# Supplementary material for: The potential use of Azolla pinnata as an alternative bio-insecticide
Source: PubMed Central journal article supplement (PMC7648075; doi:10.1038/s41598-020-75054-0), 2020-11-06
Supplement: 41598_2020_75054_MOESM1_ESM.pdf [file 41598_2020_75054_MOESM1_ESM.pdf]

## **The potential use of *Azolla pinnata* as an alternative bio-insecticide**

Rajiv Ravi<sup>1</sup>, Dinesh Rajendran<sup>2,3</sup>, Wen-Da Oh<sup>4</sup>, Mohd Sukhairi Mat Rasat<sup>6</sup>, Zulhazman Hamzah<sup>5</sup>, Intan H. Ishak<sup>2,3\*</sup>, Mohamad Faiz Mohd Amin<sup>5\*</sup>

<sup>1</sup>School of Biological Sciences, Faculty of Science and Technology, Quest International University, Jalan Raja Permaisuri Bainun, 30250 Ipoh, Perak, Malaysia.

<sup>2</sup>School of Biological Sciences, Universiti Sains Malaysia, 11800 Penang, Malaysia.

<sup>3</sup>Vector Control Research Unit, School of Biological Sciences, Universiti Sains Malaysia, 11800 Penang, Malaysia.

<sup>4</sup>School of Chemical Sciences, Universiti Sains Malaysia, 11800 Penang, Malaysia.

<sup>5</sup>Faculty of Earth Science, Universiti Malaysia Kelantan, Jeli Campus, 17600 Jeli, Kelantan, Malaysia

<sup>6</sup>Faculty of Bioengineering and Technology, Universiti Malaysia Kelantan, Jeli Campus, 17600 Jeli, Kelantan, Malaysia

Correspondence and requests for materials should be addressed to M.F.M.A, I.H.I (email: mohamadfaiz@umk.edu.my, intanishak@usm.my)

# Qualitative Compound Report

|                               |                                                     |                      |                       |
|-------------------------------|-----------------------------------------------------|----------------------|-----------------------|
| <b>Data File</b>              | M1.d                                                | <b>Sample Name</b>   | M1                    |
| <b>Sample Type</b>            | Sample                                              | <b>Position</b>      | P1-A1                 |
| <b>Instrument Name</b>        | Instrument 1                                        | <b>User Name</b>     |                       |
| <b>Acq Method</b>             | RAJIV MEOH POS.m                                    | <b>Acquired Time</b> | 21-Dec-18 10:48:09 AM |
| <b>IRM Calibration Status</b> | Success                                             | <b>DA Method</b>     | 1.m                   |
| <b>Comment</b>                |                                                     |                      |                       |
| <b>Sample Group</b>           |                                                     |                      |                       |
| <b>Acquisition SW Version</b> | 6200 series TOF/6500 series Q-TOF B.05.01 (B5125.1) |                      |                       |
|                               |                                                     | <b>Info.</b>         |                       |

**Fragmentor Voltage** 175    **Collision Energy** 0    **Ionization Mode** ESI

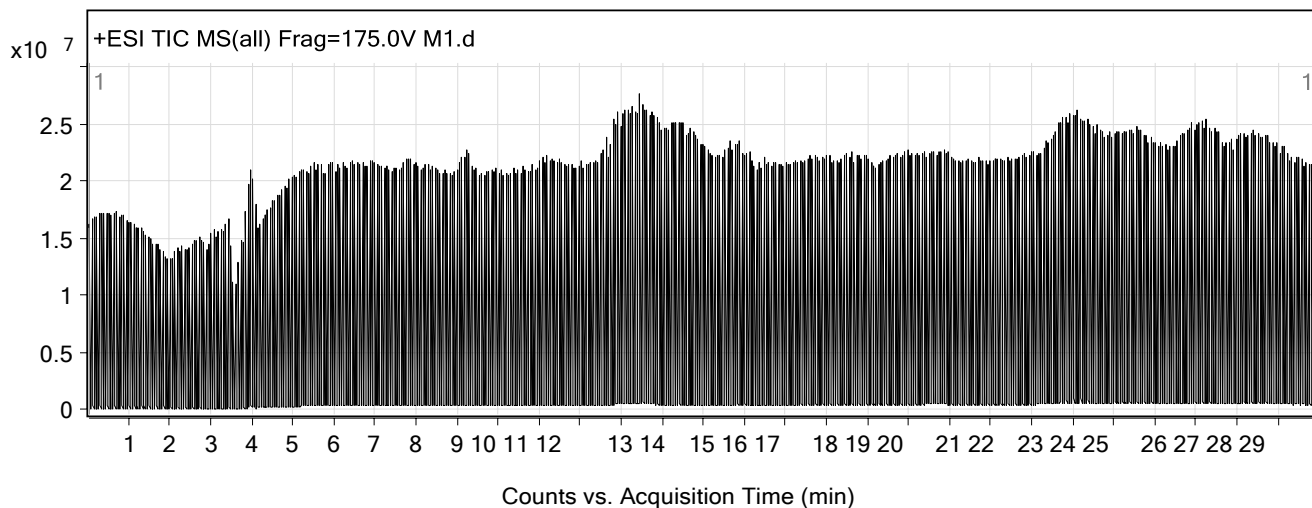

**Fragmentor Voltage** 175    **Collision Energy** 0    **Ionization Mode** ESI

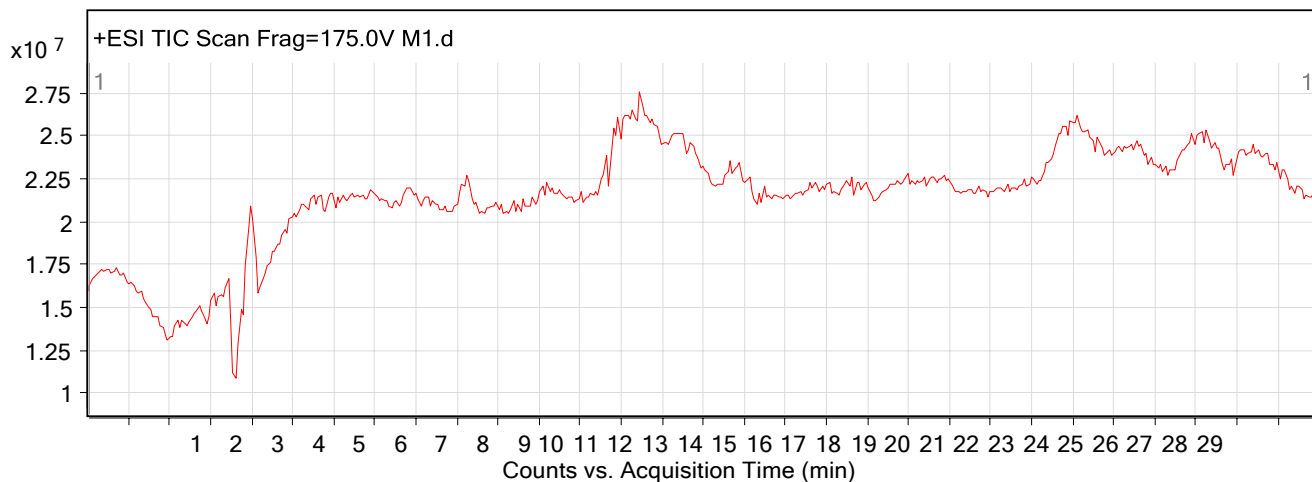

**Compound Table**

| Compound Label        | RT    | Mass     | Abund  | Name | MFG Formula    | MFG Diff (ppm) | DB Formula | DB Diff (ppm) |
|-----------------------|-------|----------|--------|------|----------------|----------------|------------|---------------|
| Cpd 1: C24 H46 N3 O12 | 6.78  | 568.3092 | 763846 |      | C24 H46 N3 O12 | -1.81          |            |               |
| Cpd 2: C26 H48 O13    | 7.076 | 568.3093 |        |      | C26 H48 O13    | 0.38           |            |               |

|                        |        |          |         |  |                |       |
|------------------------|--------|----------|---------|--|----------------|-------|
| Cpd 3: C26 H48 O13     | 7.373  | 568.3093 |         |  | C26 H48 O13    | 0.33  |
| Cpd 4: C28 H52 O14     | 7.389  | 612.3357 |         |  | C28 H52 O14    | 0.01  |
| Cpd 5: C26 H48 O13     | 7.669  | 568.3092 |         |  | C26 H48 O13    | 0.49  |
| Cpd 6: C28 H52 O14     | 7.686  | 612.3356 |         |  | C28 H52 O14    | 0.23  |
| Cpd 7: C24 H46 N3 O12  | 7.966  | 568.3091 |         |  | C24 H46 N3 O12 | -1.65 |
| Cpd 8: C28 H52 O14     | 7.982  | 612.3354 |         |  | C28 H52 O14    | 0.44  |
| Cpd 9: C24 H46 N3 O12  | 8.262  | 568.3091 |         |  | C24 H46 N3 O12 | -1.76 |
| Cpd 10: C28 H52 O14    | 8.279  | 612.3355 |         |  | C28 H52 O14    | 0.36  |
| Cpd 11: C24 H46 N3 O12 | 8.559  | 568.309  |         |  | C24 H46 N3 O12 | -1.51 |
| Cpd 12: C26 H50 N3 O13 | 8.575  | 612.3354 |         |  | C26 H50 N3 O13 | -1.61 |
| Cpd 13: C24 H46 N3 O12 | 8.855  | 568.3088 |         |  | C24 H46 N3 O12 | -1.13 |
| Cpd 14: C26 H50 N3 O13 | 8.872  | 612.3351 | 780661  |  | C26 H50 N3 O13 | -1.28 |
| Cpd 15: C26 H48 O13    | 9.152  | 568.3092 |         |  | C26 H48 O13    | 0.5   |
| Cpd 16: C24 H46 N3 O12 | 9.448  | 568.3087 |         |  | C24 H46 N3 O12 | -0.99 |
| Cpd 17: C24 H46 N3 O12 | 9.744  | 568.3092 |         |  | C24 H46 N3 O12 | -1.83 |
| Cpd 18: C28 H52 O14    | 9.761  | 612.3356 | 759748  |  | C28 H52 O14    | 0.18  |
| Cpd 19: C24 H46 N3 O12 | 10.041 | 568.3089 |         |  | C24 H46 N3 O12 | -1.32 |
| Cpd 20: C26 H50 N3 O13 | 10.057 | 612.3353 | 761718  |  | C26 H50 N3 O13 | -1.59 |
| Cpd 21: C24 H46 N3 O12 | 10.337 | 568.309  |         |  | C24 H46 N3 O12 | -1.58 |
| Cpd 22: C28 H52 O14    | 10.354 | 612.3355 |         |  | C28 H52 O14    | 0.37  |
| Cpd 23: C24 H46 N3 O12 | 10.634 | 568.3092 |         |  | C24 H46 N3 O12 | -1.85 |
| Cpd 24: C28 H52 O14    | 10.65  | 612.3356 |         |  | C28 H52 O14    | 0.15  |
| Cpd 25: C26 H48 O13    | 10.93  | 568.3094 |         |  | C26 H48 O13    | 0.08  |
| Cpd 26: C24 H46 N3 O12 | 11.227 | 568.3092 |         |  | C24 H46 N3 O12 | -1.88 |
| Cpd 27: C26 H48 O13    | 11.523 | 568.3096 |         |  | C26 H48 O13    | -0.12 |
| Cpd 28: C26 H48 O13    | 11.82  | 568.3093 |         |  | C26 H48 O13    | 0.41  |
| Cpd 29: C26 H48 O13    | 12.116 | 568.3095 |         |  | C26 H48 O13    | -0.04 |
| Cpd 30: C26 H48 O13    | 12.413 | 568.3093 |         |  | C26 H48 O13    | 0.3   |
| Cpd 31: C25 H48 N3 O6  | 12.777 | 486.355  |         |  | C25 H48 N3 O6  | -1.51 |
| Cpd 32: C23 H44 N3 O5  | 12.806 | 442.3289 |         |  | C23 H44 N3 O5  | -1.75 |
| Cpd 33: C25 H48 N3 O6  | 13.065 | 486.3551 |         |  | C25 H48 N3 O6  | -1.58 |
| Cpd 34: C23 H44 N3 O5  | 13.081 | 442.3288 |         |  | C23 H44 N3 O5  | -1.7  |
| Cpd 35: C25 H48 N3 O6  | 13.361 | 486.3551 |         |  | C25 H48 N3 O6  | -1.63 |
| Cpd 36: C23 H44 N3 O5  | 13.378 | 442.3288 | 1142531 |  | C23 H44 N3 O5  | -1.52 |
| Cpd 37: C25 H48 N3 O6  | 13.658 | 486.3552 |         |  | C25 H48 N3 O6  | -1.75 |
| Cpd 38: C23 H44 N3 O5  | 13.674 | 442.3288 |         |  | C23 H44 N3 O5  | -1.49 |
| Cpd 39: C25 H46 O6     | 13.941 | 442.3291 |         |  | C25 H46 O6     | 0.67  |
| Cpd 40: C25 H48 N3 O6  | 13.954 | 486.3553 |         |  | C25 H48 N3 O6  | -2.1  |
| Cpd 41: C24 H46 N3 O12 | 14.149 | 568.3092 |         |  | C24 H46 N3 O12 | -1.84 |
| Cpd 42: C25 H48 N3 O6  | 14.251 | 486.3551 |         |  | C25 H48 N3 O6  | -1.59 |
| Cpd 43: C23 H44 N3 O5  | 14.386 | 442.3289 |         |  | C23 H44 N3 O5  | -1.75 |
| Cpd 44: C25 H48 N3 O6  | 14.547 | 486.3551 |         |  | C25 H48 N3 O6  | -1.66 |
| Cpd 45: C26 H48 O13    | 14.911 | 568.3094 |         |  | C26 H48 O13    | 0.14  |
| Cpd 46: C26 H48 O13    | 15.199 | 568.3094 |         |  | C26 H48 O13    | 0.18  |
| Cpd 47: C28 H52 O14    | 15.394 | 612.3355 |         |  | C28 H52 O14    | 0.32  |
| Cpd 48: C26 H48 O13    | 15.496 | 568.3093 |         |  | C26 H48 O13    | 0.35  |
| Cpd 49: C28 H52 O14    | 15.69  | 612.3356 |         |  | C28 H52 O14    | 0.13  |
| Cpd 50: C24 H46 N3 O12 | 15.792 | 568.3091 |         |  | C24 H46 N3 O12 | -1.6  |
| Cpd 51: C28 H52 O14    | 15.987 | 612.3356 |         |  | C28 H52 O14    | 0.22  |
| Cpd 52: C24 H46 N3 O12 | 16.089 | 568.3092 |         |  | C24 H46 N3 O12 | -1.77 |
| Cpd 53: C28 H52 O14    | 16.283 | 612.3357 |         |  | C28 H52 O14    | 0.07  |
| Cpd 54: C24 H46 N3 O12 | 16.385 | 568.3093 |         |  | C24 H46 N3 O12 | -1.95 |
| Cpd 55: C26 H50 N3 O13 | 16.58  | 612.3354 |         |  | C26 H50 N3 O13 | -1.74 |
| Cpd 56: C24 H46 N3 O12 | 16.682 | 568.3092 |         |  | C24 H46 N3 O12 | -1.87 |
| Cpd 57: C28 H52 O14    | 16.876 | 612.3356 |         |  | C28 H52 O14    | 0.12  |
| Cpd 58: C24 H46 N3 O12 | 16.978 | 568.3091 |         |  | C24 H46 N3 O12 | -1.63 |
| Cpd 59: C28 H52 O14    | 17.173 | 612.3354 |         |  | C28 H52 O14    | 0.51  |
| Cpd 60: C24 H46 N3 O12 | 17.274 | 568.3089 |         |  | C24 H46 N3 O12 | -1.4  |
| Cpd 61: C28 H52 O14    | 17.469 | 612.3355 |         |  | C28 H52 O14    | 0.35  |
| Cpd 62: C24 H46 N3 O12 | 17.571 | 568.309  |         |  | C24 H46 N3 O12 | -1.41 |
| Cpd 63: C28 H52 O14    | 17.766 | 612.3356 |         |  | C28 H52 O14    | 0.21  |
| Cpd 64: C26 H48 O13    | 17.868 | 568.3093 |         |  | C26 H48 O13    | 0.35  |
| Cpd 65: C28 H52 O14    | 18.062 | 612.3359 |         |  | C28 H52 O14    | -0.32 |
| Cpd 66: C26 H48 O13    | 18.164 | 568.3094 |         |  | C26 H48 O13    | 0.25  |
| Cpd 67: C28 H52 O14    | 18.359 | 612.3356 |         |  | C28 H52 O14    | 0.1   |
| Cpd 68: C24 H46 N3 O12 | 18.46  | 568.3091 |         |  | C24 H46 N3 O12 | -1.69 |
| Cpd 69: C28 H52 O14    | 18.655 | 612.3356 |         |  | C28 H52 O14    | 0.19  |
| Cpd 70: C24 H46 N3 O12 | 18.757 | 568.3092 |         |  | C24 H46 N3 O12 | -1.94 |
| Cpd 71: C28 H52 O14    | 18.951 | 612.3357 |         |  | C28 H52 O14    | 0.09  |
| Cpd 72: C24 H46 N3 O12 | 19.053 | 568.3092 |         |  | C24 H46 N3 O12 | -1.94 |
| Cpd 73: C28 H52 O14    | 19.248 | 612.3354 |         |  | C28 H52 O14    | 0.48  |
| Cpd 74: C24 H46 N3 O12 | 19.35  | 568.3089 |         |  | C24 H46 N3 O12 | -1.35 |
| Cpd 75: C28 H52 O14    | 19.544 | 612.3355 |         |  | C28 H52 O14    | 0.38  |
| Cpd 76: C24 H46 N3 O12 | 19.646 | 568.3092 |         |  | C24 H46 N3 O12 | -1.82 |
| Cpd 77: C28 H52 O14    | 19.841 | 612.3355 |         |  | C28 H52 O14    | 0.4   |
| Cpd 78: C24 H46 N3 O12 | 19.943 | 568.3092 |         |  | C24 H46 N3 O12 | -1.88 |
| Cpd 79: C28 H52 O14    | 20.137 | 612.3358 |         |  | C28 H52 O14    | -0.14 |
| Cpd 80: C26 H48 O13    | 20.239 | 568.3092 |         |  | C26 H48 O13    | 0.55  |
| Cpd 81: C28 H52 O14    | 20.434 | 612.3356 |         |  | C28 H52 O14    | 0.19  |
| Cpd 82: C24 H46 N3 O12 | 20.536 | 568.3091 |         |  | C24 H46 N3 O12 | -1.66 |
| Cpd 83: C28 H52 O14    | 20.73  | 612.3356 |         |  | C28 H52 O14    | 0.18  |
| Cpd 84: C26 H48 O13    | 20.832 | 568.3092 |         |  | C26 H48 O13    | 0.44  |
| Cpd 85: C28 H52 O14    | 21.027 | 612.3357 |         |  | C28 H52 O14    | -0.02 |
| Cpd 86: C24 H46 N3 O12 | 21.129 | 568.3092 |         |  | C24 H46 N3 O12 | -1.82 |
| Cpd 87: C28 H52 O14    | 21.323 | 612.3358 |         |  | C28 H52 O14    | -0.21 |
| Cpd 88: C26 H48 O13    | 21.425 | 568.3095 |         |  | C26 H48 O13    | 0.07  |
| Cpd 89: C28 H52 O14    | 21.62  | 612.3355 |         |  | C28 H52 O14    | 0.38  |
| Cpd 90: C24 H46 N3 O12 | 21.722 | 568.3088 |         |  | C24 H46 N3 O12 | -1.18 |
| Cpd 91: C28 H52 O14    | 21.916 | 612.3358 |         |  | C28 H52 O14    | -0.11 |
| Cpd 92: C24 H46 N3 O12 | 22.018 | 568.3092 |         |  | C24 H46 N3 O12 | -1.89 |
| Cpd 93: C28 H52 O14    | 22.213 | 612.3356 |         |  | C28 H52 O14    | 0.25  |
| Cpd 94: C26 H48 O13    | 22.315 | 568.3093 |         |  | C26 H48 O13    | 0.25  |
| Cpd 95: C28 H52 O14    | 22.509 | 612.3359 |         |  | C28 H52 O14    | -0.24 |

|                                                                  |        |          |         |  |                                                         |       |            |       |
|------------------------------------------------------------------|--------|----------|---------|--|---------------------------------------------------------|-------|------------|-------|
| Cpd 96: C24 H46 N3 O12                                           | 22.611 | 568.3091 |         |  | C24 H46 N3 O12                                          | -1.66 |            |       |
| Cpd 97: C28 H52 O14                                              | 22.806 | 612.3354 |         |  | C28 H52 O14                                             | 0.48  |            |       |
| Cpd 98: C24 H46 N3 O12                                           | 22.907 | 568.3091 |         |  | C24 H46 N3 O12                                          | -1.6  |            |       |
| Cpd 99: C28 H52 O14                                              | 23.102 | 612.3356 |         |  | C28 H52 O14                                             | 0.1   |            |       |
| Cpd 100: C24 H46 N3 O12                                          | 23.204 | 568.3092 |         |  | C24 H46 N3 O12                                          | -1.77 |            |       |
| Cpd 101: C28 H52 O14                                             | 23.398 | 612.3357 |         |  | C28 H52 O14                                             | 0.05  |            |       |
| Cpd 102: C26 H48 O13                                             | 23.5   | 568.3097 |         |  | C26 H48 O13                                             | -0.29 |            |       |
| Cpd 103: C28 H52 O14                                             | 23.606 | 612.3364 |         |  | C28 H52 O14                                             | -1.06 |            |       |
| Cpd 104: C26 H48 O13                                             | 23.776 | 568.3094 |         |  | C26 H48 O13                                             | 0.16  |            |       |
| Cpd 105: 1-(O-alpha-D-glucopyranosyl)-(1,3R,25R)-hexacosanetriol | 23.805 | 576.4623 |         |  | 1-(O-alpha-D-glucopyranosyl)-(1,3R,25R)-hexacosanetriol | -3.84 | C32 H64 O8 | -3.84 |
| Cpd 106: C26 H48 O13                                             | 24.051 | 568.3094 |         |  | C26 H48 O13                                             | 0.22  |            |       |
| Cpd 107: 1-(O-alpha-D-glucopyranosyl)-(1,3R,25R)-hexacosanetriol | 24.093 | 576.4627 |         |  | 1-(O-alpha-D-glucopyranosyl)-(1,3R,25R)-hexacosanetriol | -4.5  | C32 H64 O8 | -4.5  |
| Cpd 108: C26 H48 O13                                             | 24.347 | 568.3096 |         |  | C26 H48 O13                                             | -0.14 |            |       |
| Cpd 109: 1-(O-alpha-D-glucopyranosyl)-(1,3R,25R)-hexacosanetriol | 24.39  | 576.4624 |         |  | 1-(O-alpha-D-glucopyranosyl)-(1,3R,25R)-hexacosanetriol | -3.92 | C32 H64 O8 | -3.92 |
| Cpd 110: 1-(O-alpha-D-glucopyranosyl)-(1,3R,25R)-hexacosanetriol | 24.606 | 576.4626 |         |  | 1-(O-alpha-D-glucopyranosyl)-(1,3R,25R)-hexacosanetriol | -4.27 | C32 H64 O8 | -4.27 |
| Cpd 111: C26 H48 O13                                             | 24.635 | 568.3095 |         |  | C26 H48 O13                                             | 0.04  |            |       |
| Cpd 112: C28 H52 O14                                             | 24.821 | 612.3358 |         |  | C28 H52 O14                                             | -0.14 |            |       |
| Cpd 113: C26 H48 O13                                             | 24.923 | 568.3095 |         |  | C26 H48 O13                                             | 0.07  |            |       |
| Cpd 114: C28 H52 O14                                             | 25.118 | 612.3355 |         |  | C28 H52 O14                                             | 0.39  |            |       |
| Cpd 115: C26 H48 O13                                             | 25.22  | 568.3095 |         |  | C26 H48 O13                                             | 0.03  |            |       |
| Cpd 116: C28 H52 O14                                             | 25.414 | 612.3362 |         |  | C28 H52 O14                                             | -0.85 |            |       |
| Cpd 117: C26 H48 O13                                             | 25.516 | 568.3099 |         |  | C26 H48 O13                                             | -0.73 |            |       |
| Cpd 118: C28 H52 O14                                             | 25.711 | 612.3359 |         |  | C28 H52 O14                                             | -0.27 |            |       |
| Cpd 119: C26 H48 O13                                             | 25.813 | 568.3096 |         |  | C26 H48 O13                                             | -0.22 |            |       |
| Cpd 120: C28 H52 O14                                             | 26.007 | 612.3357 | 1077429 |  | C28 H52 O14                                             | 0.02  |            |       |
| Cpd 121: C26 H48 O13                                             | 26.109 | 568.3095 |         |  | C26 H48 O13                                             | -0.04 |            |       |
| Cpd 122: C28 H52 O14                                             | 26.215 | 612.3362 | 1003813 |  | C28 H52 O14                                             | -0.88 |            |       |
| Cpd 123: C26 H48 O13                                             | 26.406 | 568.3095 |         |  | C26 H48 O13                                             | 0.05  |            |       |
| Cpd 124: C24 H44 O12                                             | 26.422 | 524.2832 |         |  | C24 H44 O12                                             | 0.15  |            |       |
| Cpd 125: C26 H48 O13                                             | 26.702 | 568.3096 |         |  | C26 H48 O13                                             | -0.13 |            |       |
| Cpd 126: C24 H44 O12                                             | 26.719 | 524.2832 |         |  | C24 H44 O12                                             | 0.2   |            |       |
| Cpd 127: C24 H46 N3 O12                                          | 26.999 | 568.3091 |         |  | C24 H46 N3 O12                                          | -1.76 |            |       |
| Cpd 128: C22 H42 N3 O11                                          | 27.015 | 524.2827 |         |  | C22 H42 N3 O11                                          | -1.5  |            |       |
| Cpd 129: C26 H48 O13                                             | 27.295 | 568.3093 |         |  | C26 H48 O13                                             | 0.29  |            |       |
| Cpd 130: C22 H42 N3 O11                                          | 27.312 | 524.2829 |         |  | C22 H42 N3 O11                                          | -1.93 |            |       |
| Cpd 131: C26 H48 O13                                             | 27.592 | 568.3094 |         |  | C26 H48 O13                                             | 0.25  |            |       |
| Cpd 132: C22 H42 N3 O11                                          | 27.608 | 524.283  |         |  | C22 H42 N3 O11                                          | -2.03 |            |       |
| Cpd 133: C22 H42 N3 O11                                          | 27.845 | 524.2825 |         |  | C22 H42 N3 O11                                          | -1.08 |            |       |
| Cpd 134: C26 H48 O13                                             | 27.888 | 568.3094 | 1198499 |  | C26 H48 O13                                             | 0.19  |            |       |
| Cpd 135: C28 H52 O14                                             | 27.905 | 612.3358 | 1050410 |  | C28 H52 O14                                             | -0.13 |            |       |
| Cpd 136: C26 H48 O13                                             | 28.185 | 568.3096 | 1252735 |  | C26 H48 O13                                             | -0.14 |            |       |
| Cpd 137: C28 H52 O14                                             | 28.201 | 612.3358 |         |  | C28 H52 O14                                             | -0.2  |            |       |
| Cpd 138: C26 H48 O13                                             | 28.481 | 568.3095 | 1294616 |  | C26 H48 O13                                             | 0.04  |            |       |
| Cpd 139: C28 H52 O14                                             | 28.498 | 612.3357 |         |  | C28 H52 O14                                             | 0.02  |            |       |
| Cpd 140: C26 H48 O13                                             | 28.756 | 568.3096 | 1257625 |  | C26 H48 O13                                             | -0.27 |            |       |
| Cpd 141: C28 H52 O14                                             | 28.786 | 612.3358 |         |  | C28 H52 O14                                             | -0.17 |            |       |
| Cpd 142: C26 H48 O13                                             | 28.972 | 568.3095 | 1199141 |  | C26 H48 O13                                             | -0.04 |            |       |
| Cpd 143: C28 H52 O14                                             | 29.074 | 612.3356 |         |  | C28 H52 O14                                             | 0.21  |            |       |
| Cpd 144: C22 H42 N3 O11                                          | 29.18  | 524.2828 |         |  | C22 H42 N3 O11                                          | -1.6  |            |       |
| Cpd 145: C26 H48 O13                                             | 29.319 | 568.3094 | 1095542 |  | C26 H48 O13                                             | 0.24  |            |       |
| Cpd 146: C28 H52 O14                                             | 29.349 | 612.3357 |         |  | C28 H52 O14                                             | 0.08  |            |       |
| Cpd 147: C24 H46 N3 O12                                          | 29.608 | 568.3092 | 1063629 |  | C24 H46 N3 O12                                          | -1.88 |            |       |
| Cpd 148: C28 H52 O14                                             | 29.624 | 612.3356 |         |  | C28 H52 O14                                             | 0.23  |            |       |
| Cpd 149: C26 H48 O13                                             | 29.874 | 568.3093 | 1046445 |  | C26 H48 O13                                             | 0.35  |            |       |
| Cpd 150: C28 H52 O14                                             | 29.891 | 612.3357 |         |  | C28 H52 O14                                             | -0.02 |            |       |

| Compound Label        | m/z      | RT   | Algorithm  | Mass     |
|-----------------------|----------|------|------------|----------|
| Cpd 1: C24 H46 N3 O12 | 569.3166 | 6.78 | Auto MS/MS | 568.3092 |

#### Compound Chromatograms

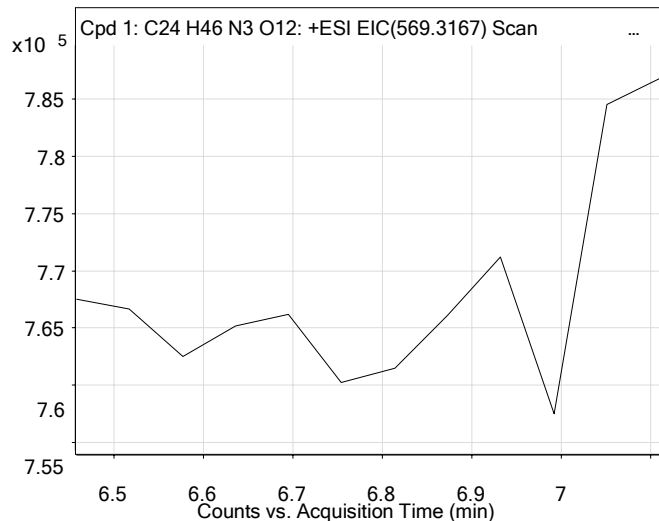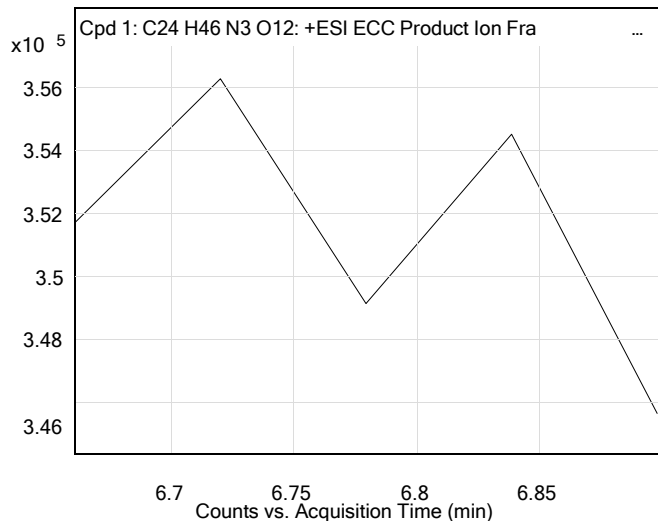

MS Spectrum

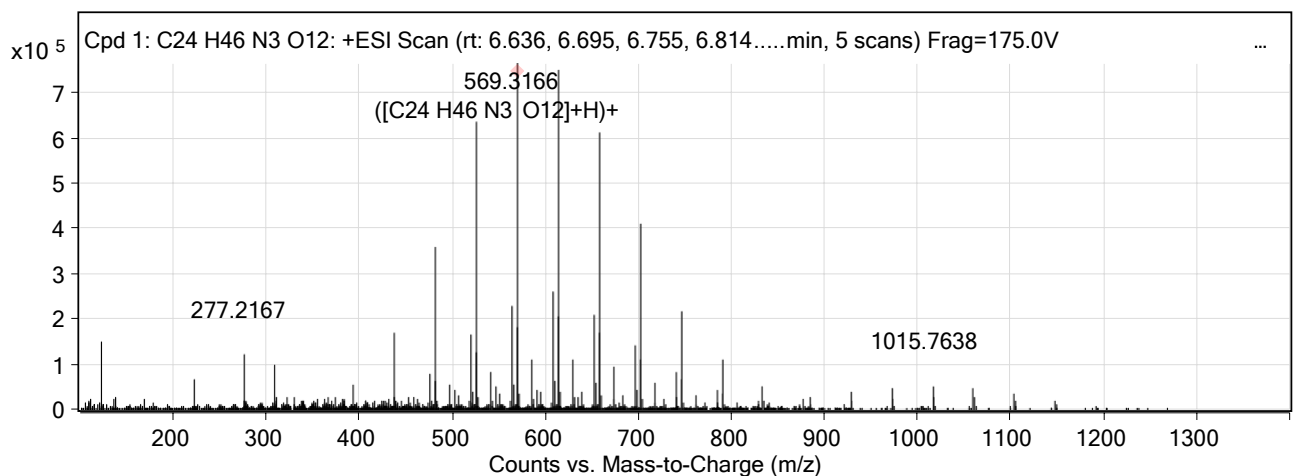

MS Zoomed Spectrum

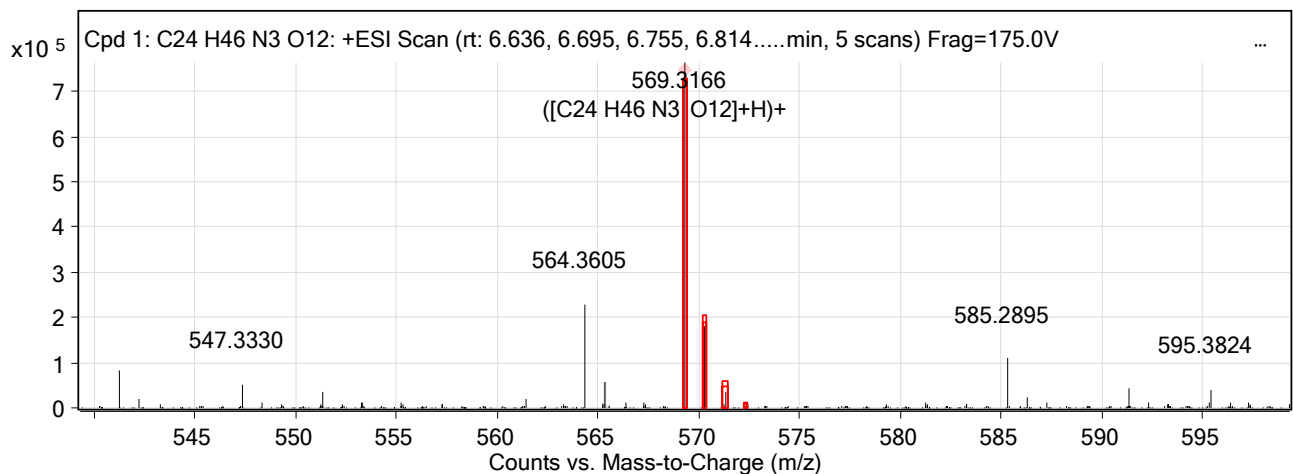

MS Spectrum Peak List

| m/z      | Calc m/z | Diff(ppm) | z | Abund     | Formula        | Ion    |
|----------|----------|-----------|---|-----------|----------------|--------|
| 481.2634 |          |           | 1 | 360453.59 |                |        |
| 525.2899 |          |           | 1 | 635024.13 |                |        |
| 569.3166 | 569.3154 | -2.11     | 1 | 763845.75 | C24 H46 N3 O12 | (M+H)+ |
| 570.3192 | 570.3186 | -1.12     | 1 | 182956.59 | C24 H46 N3 O12 | (M+H)+ |
| 571.3204 | 571.3209 | 0.89      | 1 | 35173.77  | C24 H46 N3 O12 | (M+H)+ |
| 572.323  | 572.3235 | 0.98      | 1 | 5395.52   | C24 H46 N3 O12 | (M+H)+ |
| 608.3868 |          |           | 1 | 259448.13 |                |        |
| 613.343  |          |           | 1 | 746702.31 |                |        |
| 657.3691 |          |           | 1 | 611324.63 |                |        |

MSMS Spectrum

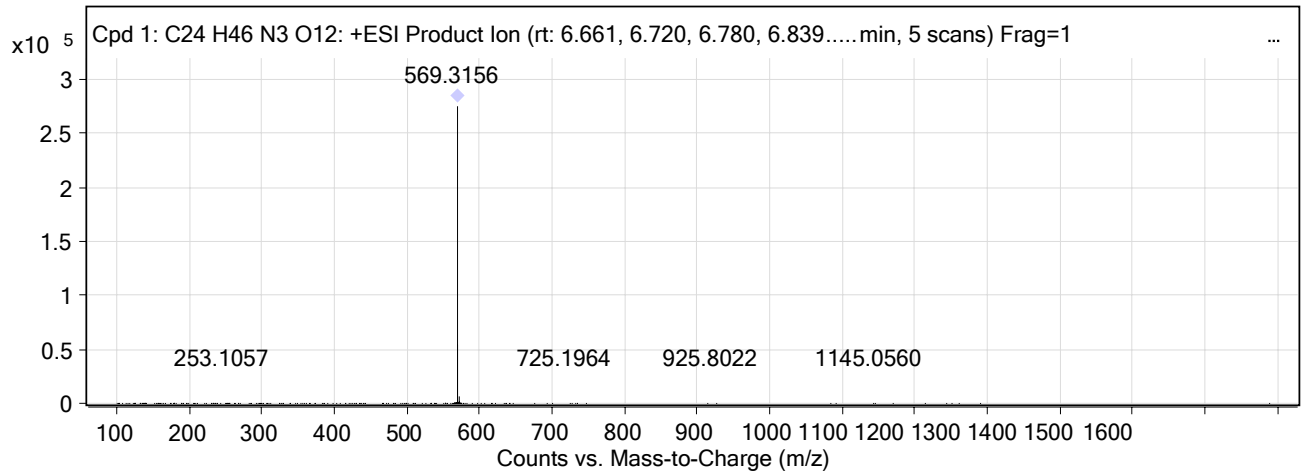

MS/MS Spectrum PeakList

| m/z      | Calc m/z | Diff(ppm) | z | Abund     |
|----------|----------|-----------|---|-----------|
| 123.0416 | 123.0427 | 9.05      | 1 | 62.5      |
| 137.0579 | 137.0584 | 3.32      | 1 | 52.39     |
| 181.084  | 181.0846 | 3.03      |   | 23.68     |
| 209.0807 | 209.0768 | -18.37    |   | 31.15     |
| 221.1134 | 221.1132 | -1.01     |   | 30.31     |
| 237.1122 | 237.1081 | -17.25    |   | 20.51     |
| 253.1057 | 253.103  | -10.5     | 1 | 46.32     |
| 309.2783 | 309.2788 | 1.74      |   | 24.28     |
| 566.2923 | 566.292  | -0.62     | 1 | 41.6      |
| 569.3156 | 569.3154 | -0.36     | 1 | 275670.47 |

| Compound Label     | m/z      | RT    | Algorithm  | Mass     |
|--------------------|----------|-------|------------|----------|
| Cpd 2: C26 H48 O13 | 569.3168 | 7.076 | Auto MS/MS | 568.3093 |

Compound Chromatograms

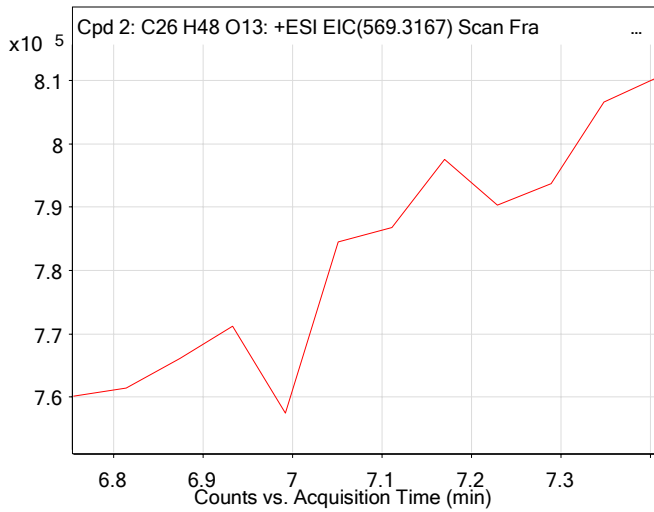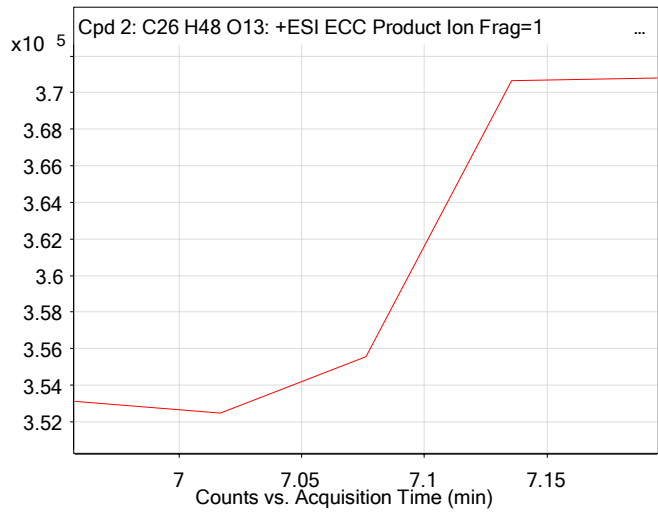

MS Spectrum

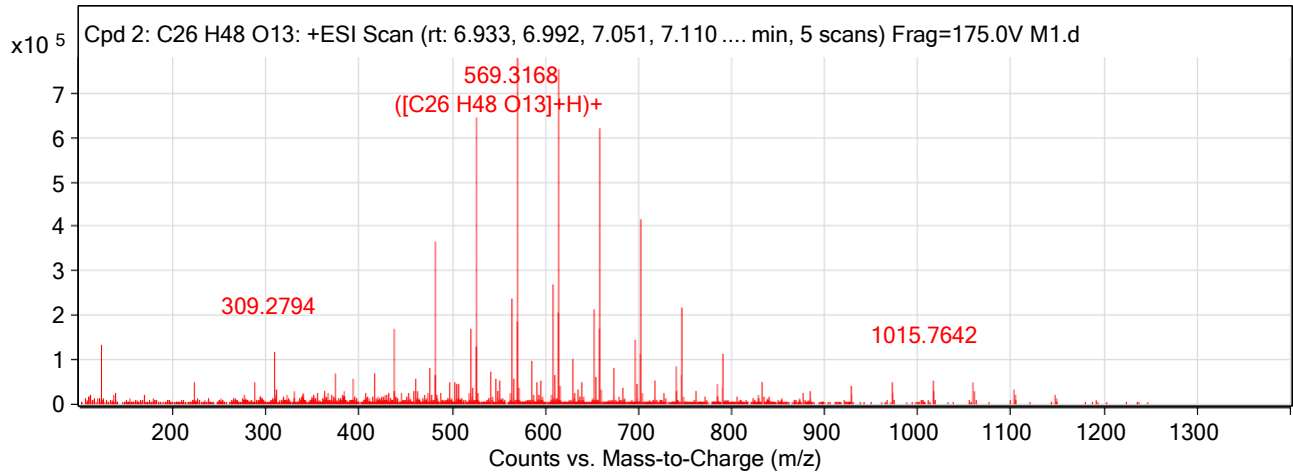

MS Zoomed Spectrum

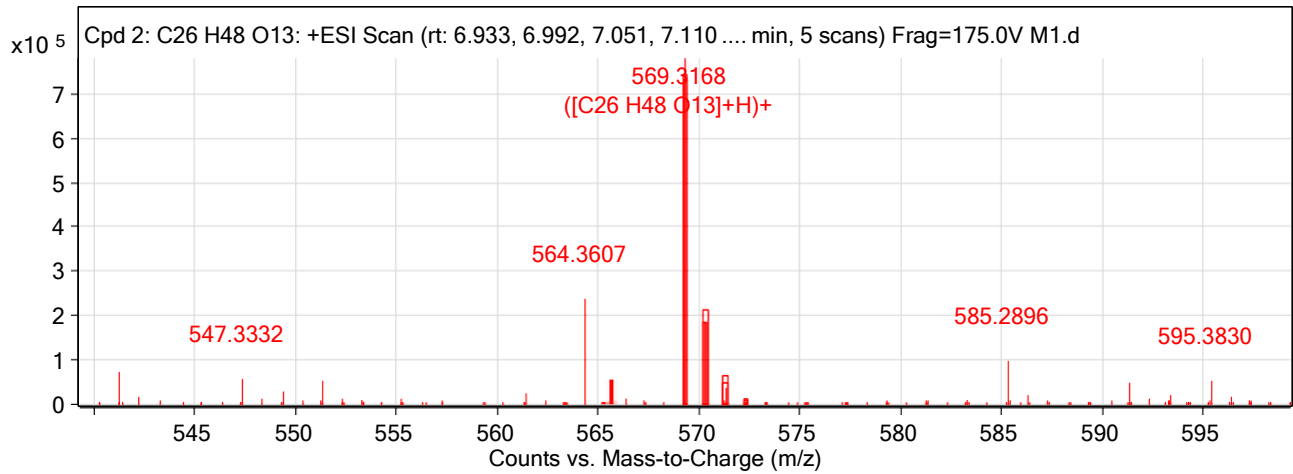

MS Spectrum Peak List

| m/z      | Calc m/z | Diff(ppm) | z | Abund     | Formula     | Ion    |
|----------|----------|-----------|---|-----------|-------------|--------|
| 481.2635 |          |           | 1 | 365058.25 |             |        |
| 525.2901 |          |           | 1 | 644685.44 |             |        |
| 569.3168 | 569.3168 | -0.03     | 1 | 779540.69 | C26 H48 O13 | (M+H)+ |
| 570.3193 | 570.3202 | 1.49      | 1 | 184214.08 | C26 H48 O13 | (M+H)+ |
| 571.3208 | 571.3226 | 3.17      | 1 | 35404.6   | C26 H48 O13 | (M+H)+ |
| 572.3233 | 572.3253 | 3.55      | 1 | 5395.84   | C26 H48 O13 | (M+H)+ |
| 608.387  |          |           | 1 | 267952.19 |             |        |
| 613.3432 |          |           | 1 | 753142.5  |             |        |
| 657.3692 |          |           | 1 | 620547.69 |             |        |
| 701.3954 |          |           | 1 | 412605.53 |             |        |

MSMS Spectrum

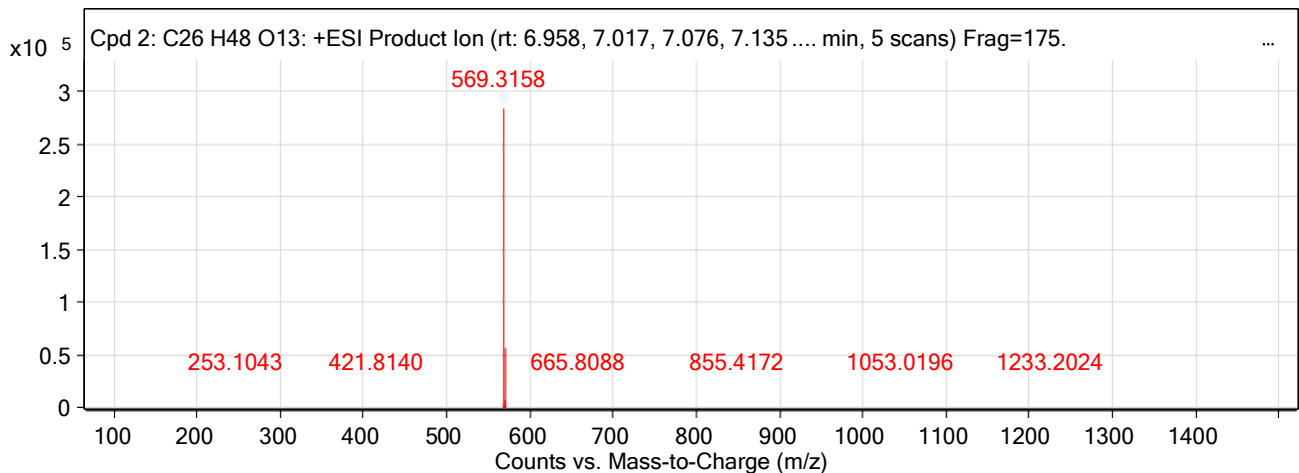

**MS/MS Spectrum Peak List**

| m/z      | Calc m/z | Diff(ppm) | z | Abund     |
|----------|----------|-----------|---|-----------|
| 113.0592 | 113.0597 | 4.69      |   | 14.42     |
| 123.0418 | 123.0441 | 18.06     |   | 72.87     |
| 137.0582 | 137.0597 | 10.63     |   | 21.84     |
| 139.0753 | 139.0754 | 0.05      |   | 14.65     |
| 175.1335 | 175.1329 | -3.67     |   | 24.55     |
| 265.1693 | 265.1646 | -17.78    |   | 19.75     |
| 309.2774 | 309.2788 | 4.65      | 1 | 17.28     |
| 566.285  | 566.2933 | 14.63     | 1 | 28.29     |
| 567.3067 |          |           | 1 | 16.31     |
| 569.3158 | 569.3168 | 1.75      | 1 | 283397.41 |

| Compound Label     | m/z      | RT    | Algorithm  | Mass     |
|--------------------|----------|-------|------------|----------|
| Cpd 3: C26 H48 O13 | 569.3168 | 7.373 | Auto MS/MS | 568.3093 |

**Compound Chromatograms**

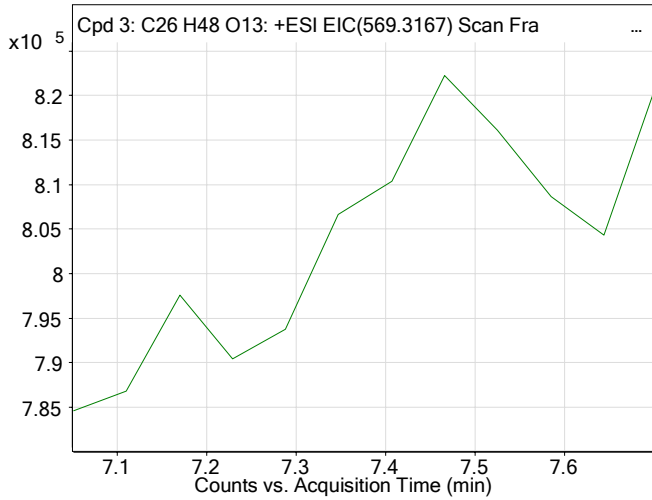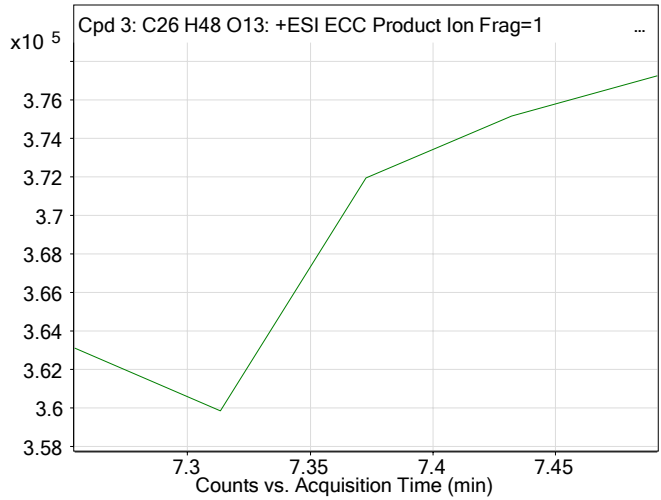

MS Spectrum

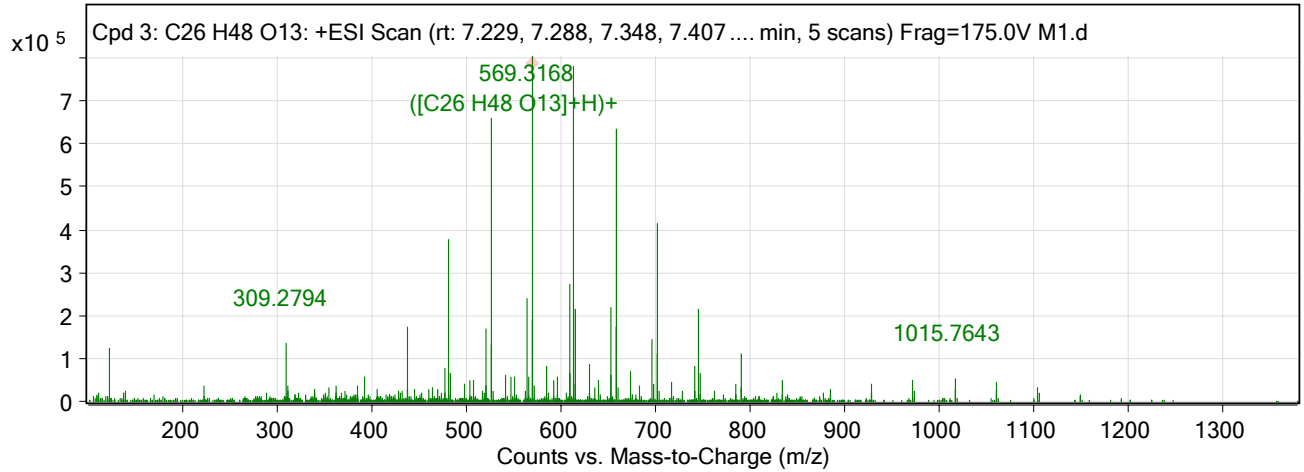

MS Zoomed Spectrum



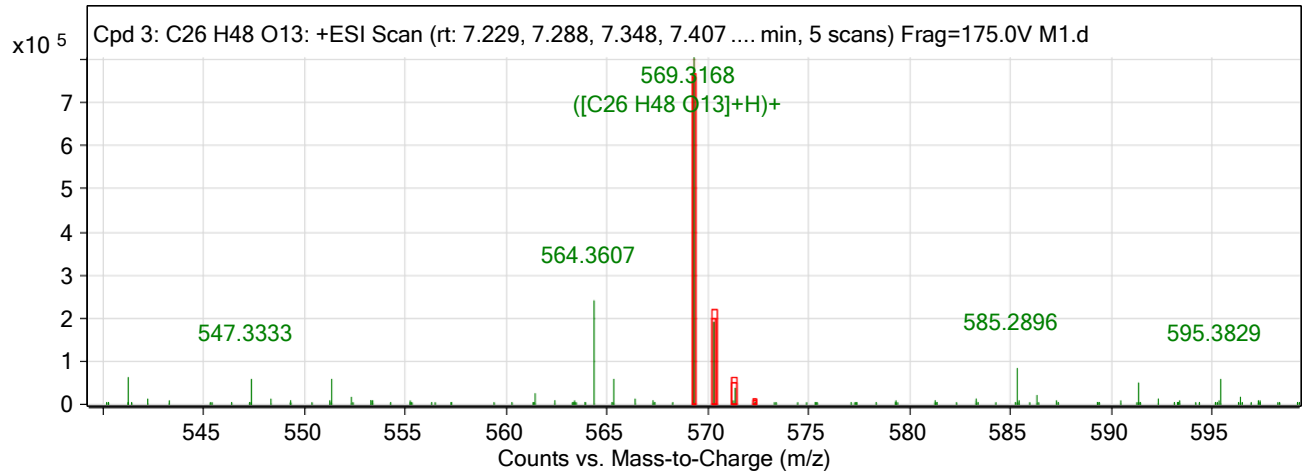

**MS Spectrum Peak List**

| m/z      | Calc m/z | Diff(ppm) | z | Abund     | Formula     | Ion    |
|----------|----------|-----------|---|-----------|-------------|--------|
| 481.2636 |          |           | 1 | 375904.41 |             |        |
| 525.2902 |          |           | 1 | 658268.69 |             |        |
| 569.3168 | 569.3168 | -0.09     | 1 | 804684.19 | C26 H48 O13 | (M+H)+ |
| 570.3194 | 570.3202 | 1.47      | 1 | 192350.2  | C26 H48 O13 | (M+H)+ |
| 571.3208 | 571.3226 | 3.06      | 1 | 35794.53  | C26 H48 O13 | (M+H)+ |
| 572.3232 | 572.3253 | 3.58      | 1 | 5368.08   | C26 H48 O13 | (M+H)+ |
| 608.3871 |          |           | 1 | 273130.44 |             |        |
| 613.3432 |          |           | 1 | 778643.75 |             |        |
| 657.3693 |          |           | 1 | 633454.88 |             |        |
| 701.3954 |          |           | 1 | 417069.81 |             |        |

MSMS Spectrum

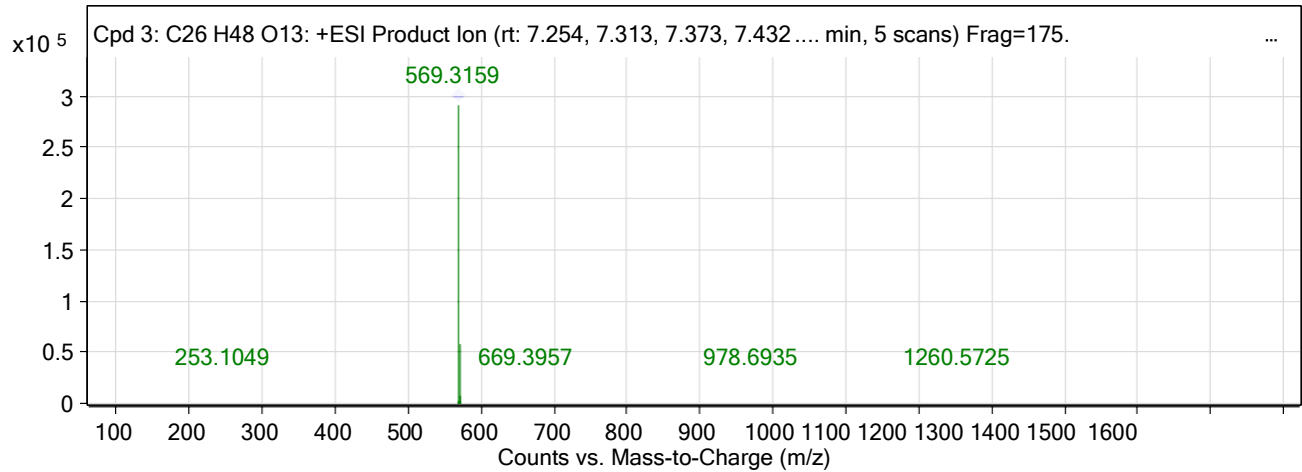

**MS/MS Spectrum Peak List**

| m/z      | Calc m/z | Diff(ppm) | z | Abund     |
|----------|----------|-----------|---|-----------|
| 123.0416 | 123.0441 | 19.75     |   | 32.08     |
| 123.0802 | 123.0804 | 2.23      |   | 22.43     |
| 137.058  | 137.0597 | 12.58     |   | 19.64     |
| 137.0951 | 137.0961 | 7.29      |   | 18.28     |
| 139.0754 | 139.0754 | -0.56     |   | 18.33     |
| 175.1308 | 175.1329 | 11.82     |   | 13.59     |
| 195.0956 | 195.1016 | 30.61     |   | 15.54     |
| 283.2608 | 283.2632 | 8.47      |   | 16.79     |
| 553.2885 | 553.2855 | -5.54     |   | 14.62     |
| 569.3159 | 569.3168 | 1.52      | 1 | 291079.69 |

| Compound Label     | m/z      | RT    | Algorithm  | Mass     |
|--------------------|----------|-------|------------|----------|
| Cpd 4: C28 H52 O14 | 613.3432 | 7.389 | Auto MS/MS | 612.3357 |

Compound Chromatograms

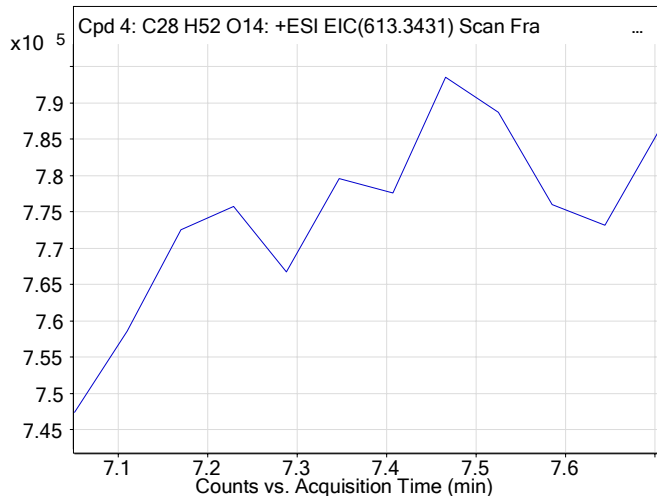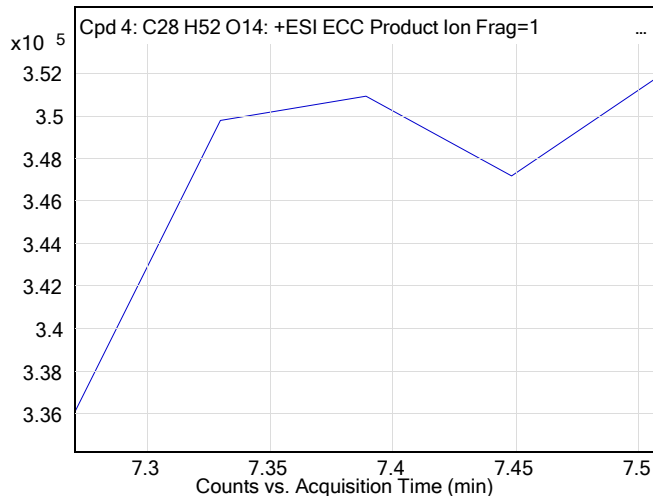

MS Spectrum

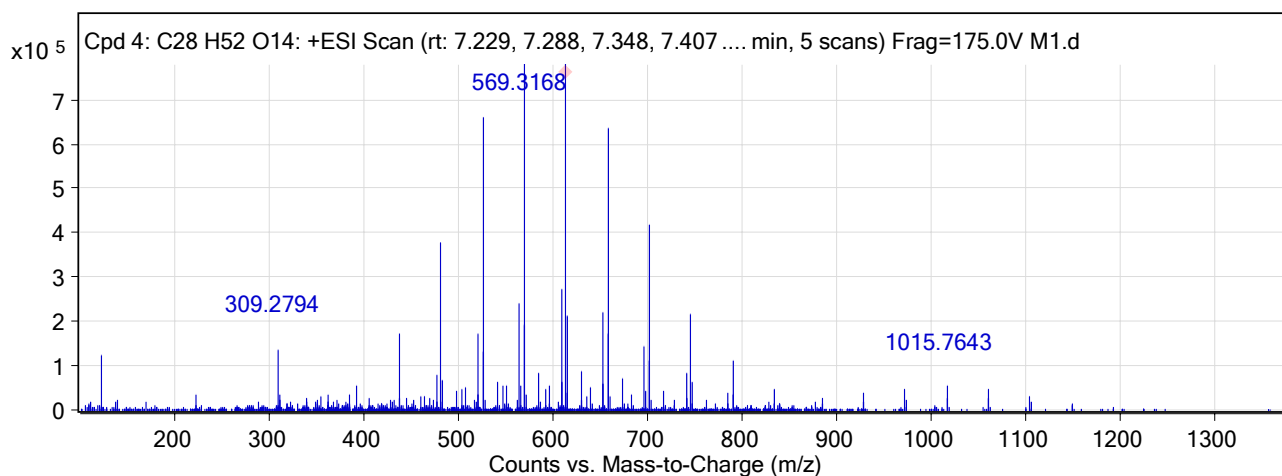

MS Zoomed Spectrum

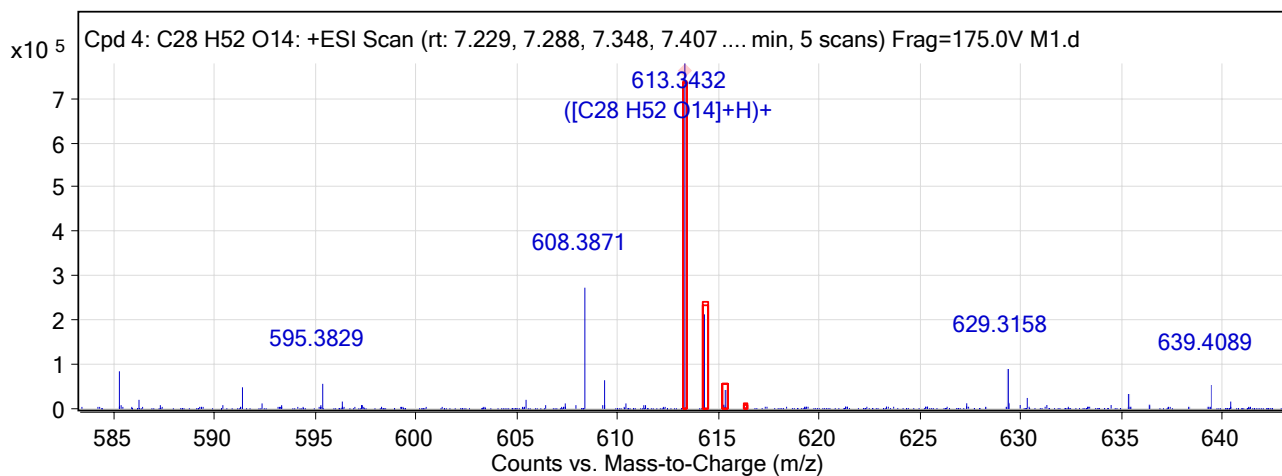

MS Spectrum Peak List

| m/z      | Calc m/z | Diff(ppm) | z | Abund     | Formula     | Ion    |
|----------|----------|-----------|---|-----------|-------------|--------|
| 481.2636 |          |           | 1 | 375904.41 |             |        |
| 525.2902 |          |           | 1 | 658268.69 |             |        |
| 569.3168 |          |           | 1 | 804684.19 |             |        |
| 608.3871 |          |           | 1 | 273130.44 |             |        |
| 613.3432 | 613.343  | -0.41     | 1 | 778643.75 | C28 H52 O14 | (M+H)+ |
| 614.3458 | 614.3464 | 1         | 1 | 214062.55 | C28 H52 O14 | (M+H)+ |
| 615.3474 | 615.3489 | 2.42      | 1 | 40915     | C28 H52 O14 | (M+H)+ |
| 616.3503 | 616.3515 | 2.02      | 1 | 5899.75   | C28 H52 O14 | (M+H)+ |

MSMS Spectrum

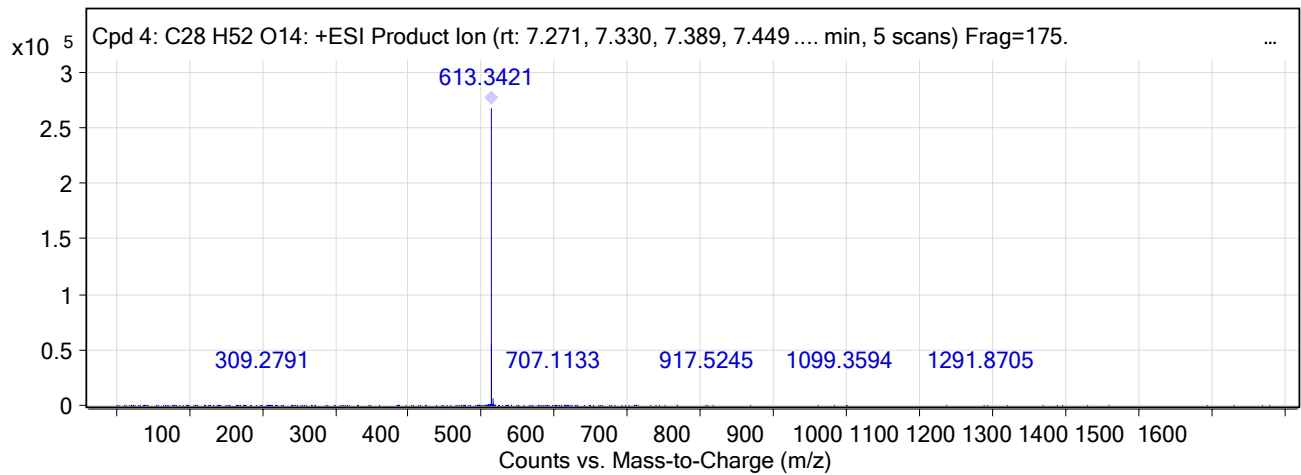

MS/MS Spectrum Peak List

| m/z      | Calc m/z | Diff(ppm) | z | Abund     |
|----------|----------|-----------|---|-----------|
| 111.116  | 111.1168 | 7.13      |   | 20.45     |
| 123.0416 | 123.0441 | 19.86     |   | 59.09     |
| 133.0865 | 133.0859 | -4.06     |   | 42.84     |
| 137.0576 | 137.0597 | 15.3      |   | 49.66     |
| 181.0852 | 181.0859 | 3.98      |   | 22.86     |
| 221.1382 | 221.1384 | 0.67      |   | 37.26     |
| 305.1549 | 305.1595 | 14.95     |   | 20.98     |
| 309.2791 | 309.2788 | -0.84     | 1 | 81        |
| 609.3179 | 609.3117 | -10.14    |   | 16.11     |
| 613.3421 | 613.343  | 1.46      | 1 | 267731.75 |

| Compound Label     | m/z      | RT    | Algorithm  | Mass     |
|--------------------|----------|-------|------------|----------|
| Cpd 5: C26 H48 O13 | 569.3167 | 7.669 | Auto MS/MS | 568.3092 |

Compound Chromatograms

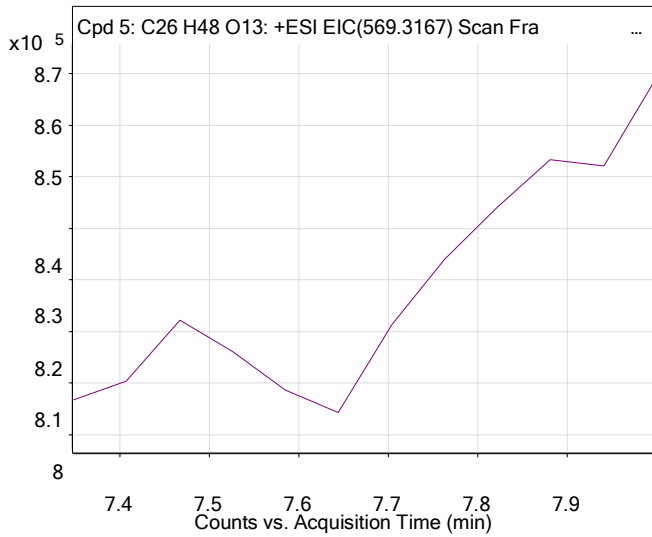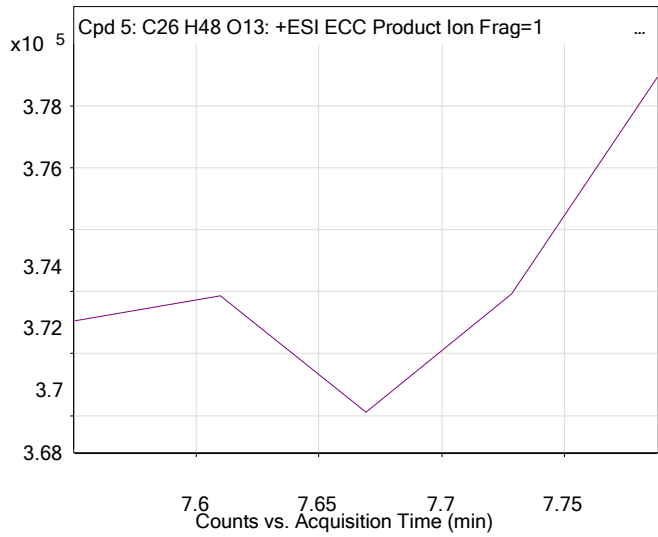

MS Spectrum

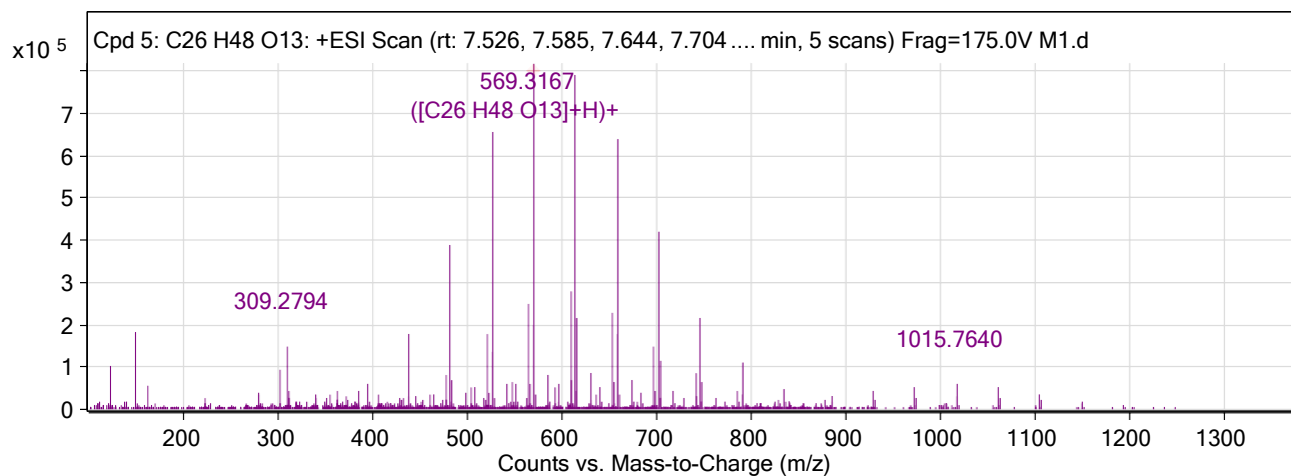

MS Zoomed Spectrum

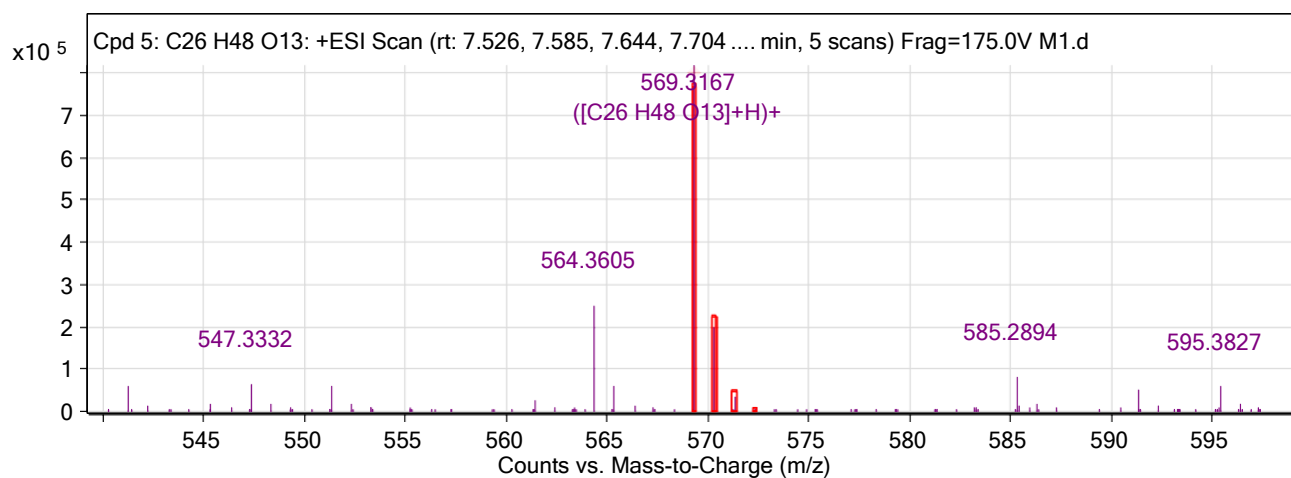

MS Spectrum Peak List

| m/z      | Calc m/z | Diff(ppm) | z | Abund     | Formula     | Ion    |
|----------|----------|-----------|---|-----------|-------------|--------|
| 481.2634 |          |           | 1 | 385549.22 |             |        |
| 525.2903 |          |           | 1 | 652988.13 |             |        |
| 569.3167 | 569.3168 | 0.08      | 1 | 816876.81 | C26 H48 O13 | (M+H)+ |
| 570.3192 | 570.3202 | 1.66      | 1 | 196281.53 | C26 H48 O13 | (M+H)+ |
| 571.321  | 571.3226 | 2.8       | 1 | 35324.41  | C26 H48 O13 | (M+H)+ |
| 572.323  | 572.3253 | 4.04      | 1 | 5107.74   | C26 H48 O13 | (M+H)+ |
| 608.387  |          |           | 1 | 280152.34 |             |        |
| 613.3431 |          |           | 1 | 786583.56 |             |        |
| 657.3692 |          |           | 1 | 635701.56 |             |        |
| 701.3953 |          |           | 1 | 417346.56 |             |        |

MSMS Spectrum

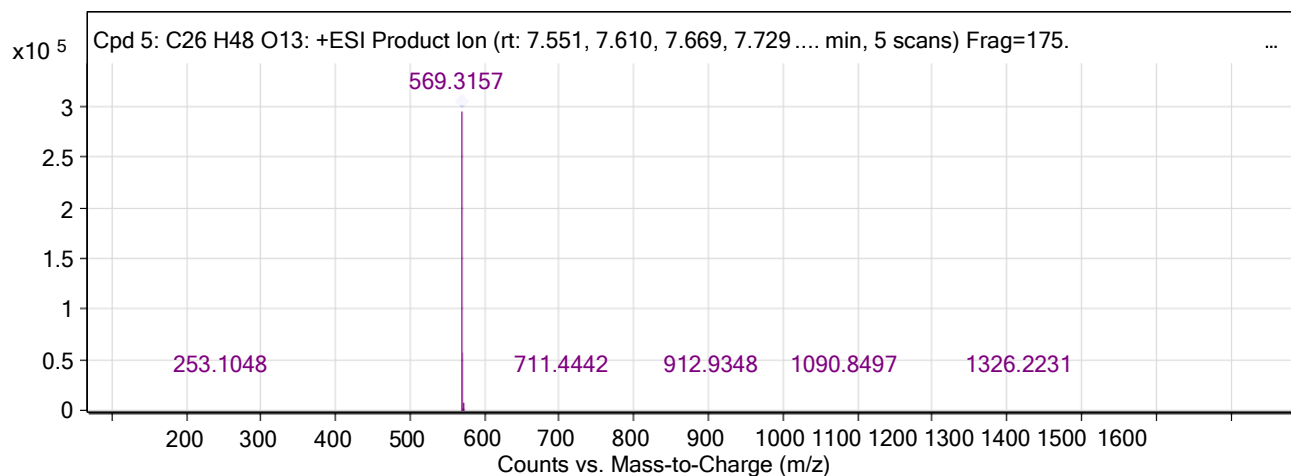

**MS/MS Spectrum Peak List**

| m/z      | Calc m/z | Diff(ppm) | z | Abund     |
|----------|----------|-----------|---|-----------|
| 123.0415 | 123.0441 | 20.59     |   | 27.43     |
| 124.0827 | 124.0883 | 45.17     |   | 10.63     |
| 170.0876 | 170.0937 | 36.09     |   | 10.83     |
| 171.1006 | 171.1016 | 5.64      |   | 11.2      |
| 233.1736 | 233.1747 | 4.84      |   | 11.88     |
| 255.1536 | 255.1591 | 21.57     |   | 11.26     |
| 309.2776 | 309.2788 | 3.91      |   | 40.03     |
| 318.1972 | 318.2037 | 20.44     |   | 12.42     |
| 350.2605 | 350.2663 | 16.49     |   | 12.08     |
| 569.3157 | 569.3168 | 1.89      | 1 | 295311.06 |

| Compound Label     | m/z      | RT    | Algorithm  | Mass     |
|--------------------|----------|-------|------------|----------|
| Cpd 6: C28 H52 O14 | 613.3431 | 7.686 | Auto MS/MS | 612.3356 |

**Compound Chromatograms**

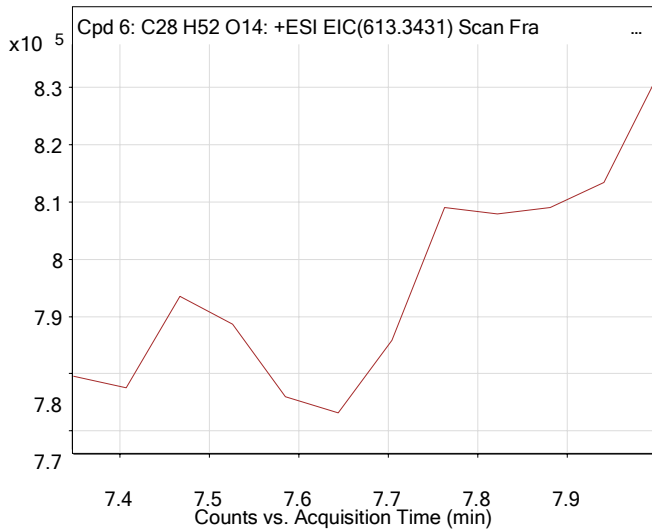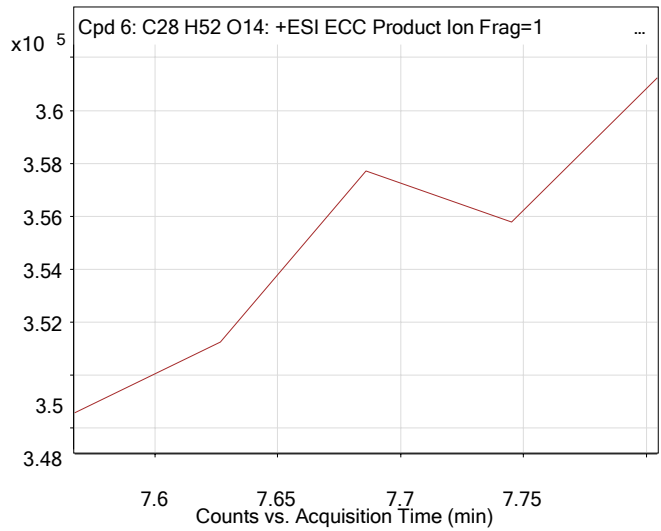

**MS Spectrum**

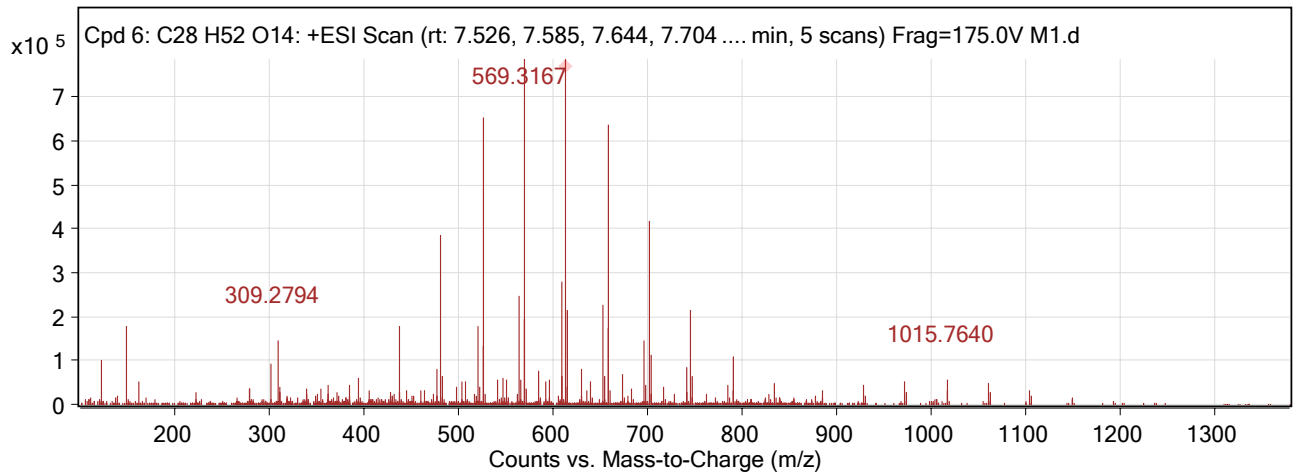

**MS Zoomed Spectrum**

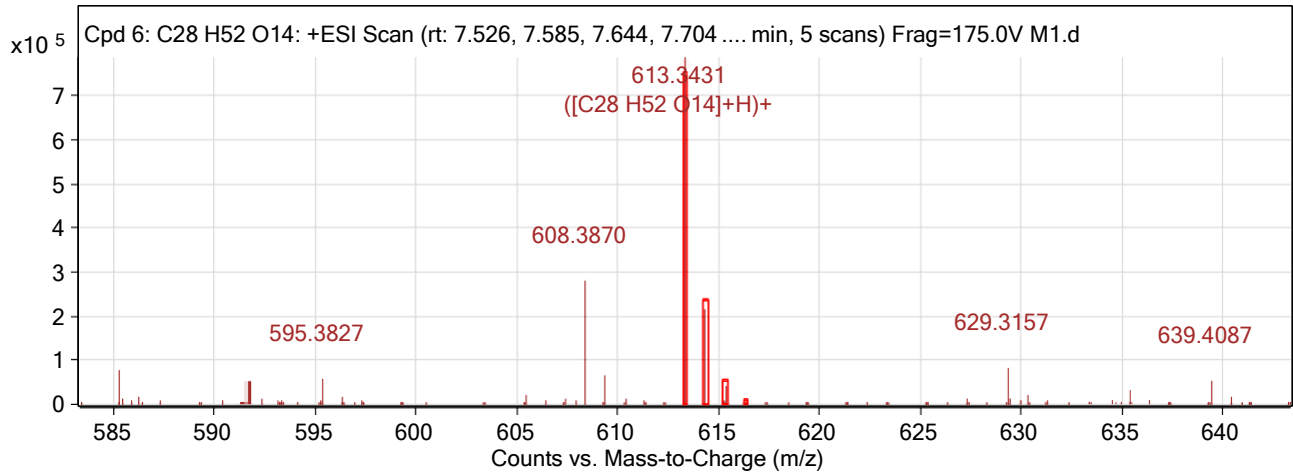

**MS Spectrum Peak List**

| m/z      | Calc m/z | Diff(ppm) | z | Abund     | Formula     | Ion    |
|----------|----------|-----------|---|-----------|-------------|--------|
| 481.2634 |          |           | 1 | 385549.22 |             |        |
| 525.2903 |          |           | 1 | 652988.13 |             |        |
| 569.3167 |          |           | 1 | 816876.81 |             |        |
| 608.387  |          |           | 1 | 280152.34 |             |        |
| 613.3431 | 613.343  | -0.17     | 1 | 786583.56 | C28 H52 O14 | (M+H)+ |
| 614.3457 | 614.3464 | 1.21      | 1 | 216046.84 | C28 H52 O14 | (M+H)+ |
| 615.3474 | 615.3489 | 2.31      | 1 | 41876.41  | C28 H52 O14 | (M+H)+ |
| 616.35   | 616.3515 | 2.55      | 1 | 5973.35   | C28 H52 O14 | (M+H)+ |
| 657.3692 |          |           | 1 | 635701.56 |             |        |
| 701.3953 |          |           | 1 | 417346.56 |             |        |

MSMS Spectrum

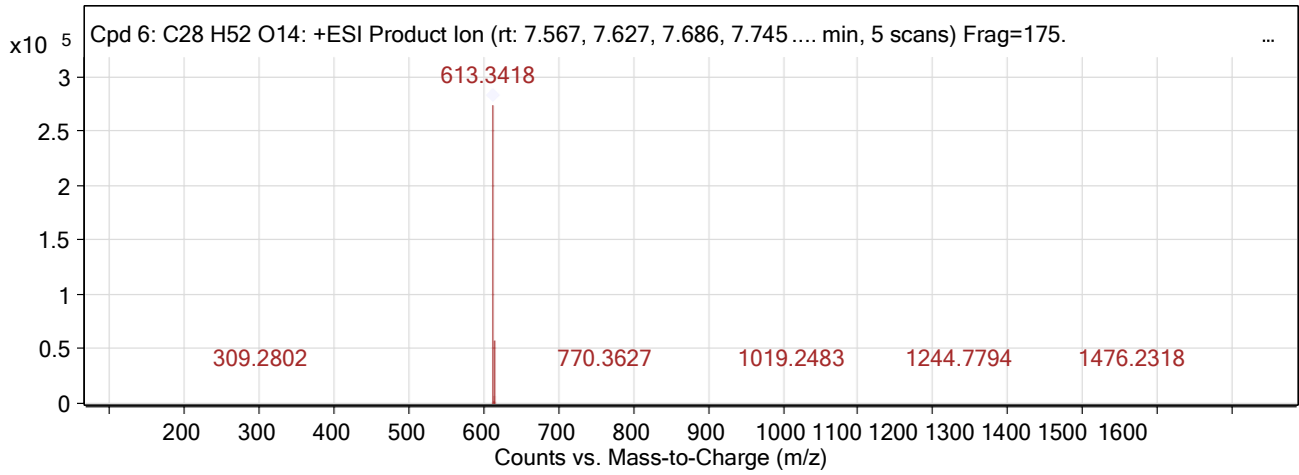

**MS/MS Spectrum Peak List**

| m/z      | Calc m/z | Diff(ppm) | z | Abund     |
|----------|----------|-----------|---|-----------|
| 123.0417 | 123.0441 | 19.22     | 1 | 42.43     |
| 137.0579 | 137.0597 | 13.45     |   | 22.99     |
| 185.1195 | 185.1172 | -12.23    |   | 18.4      |
| 221.1375 | 221.1384 | 3.79      |   | 15.86     |
| 283.2636 | 283.2632 | -1.49     |   | 20.1      |
| 298.1724 | 298.1775 | 17.17     |   | 19.89     |
| 309.2802 | 309.2788 | -4.44     | 1 | 109.57    |
| 613.3418 | 613.343  | 1.91      | 1 | 273451.75 |
| 614.3446 |          |           | 1 | 57546     |
| 615.3465 |          |           | 1 | 7294.92   |

| Compound Label        | m/z      | RT    | Algorithm  | Mass     |
|-----------------------|----------|-------|------------|----------|
| Cpd 7: C24 H46 N3 O12 | 569.3165 | 7.966 | Auto MS/MS | 568.3091 |

**Compound Chromatograms**

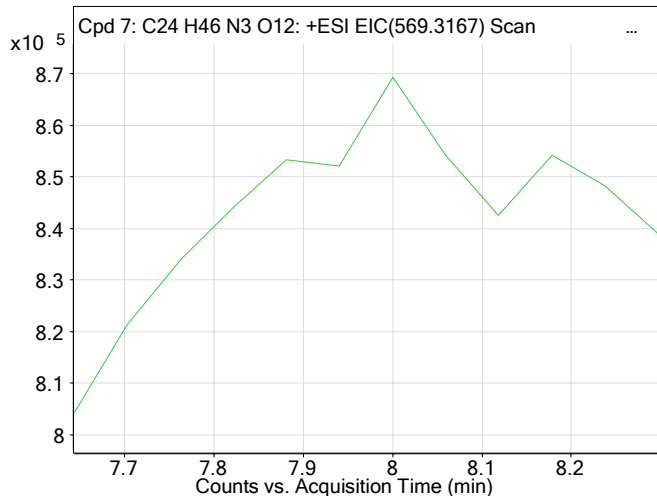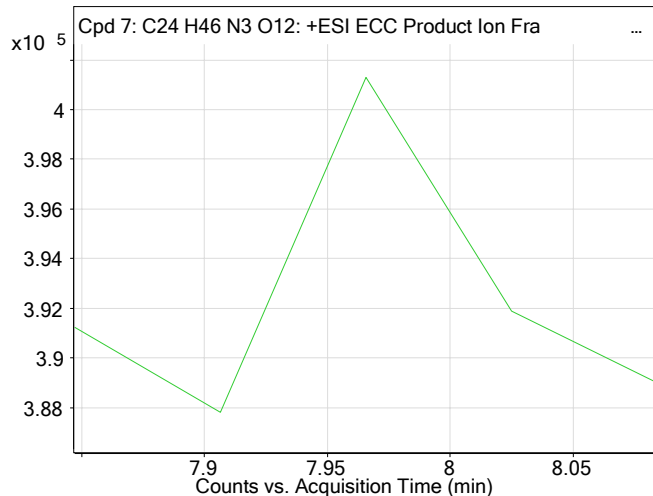

MS Spectrum

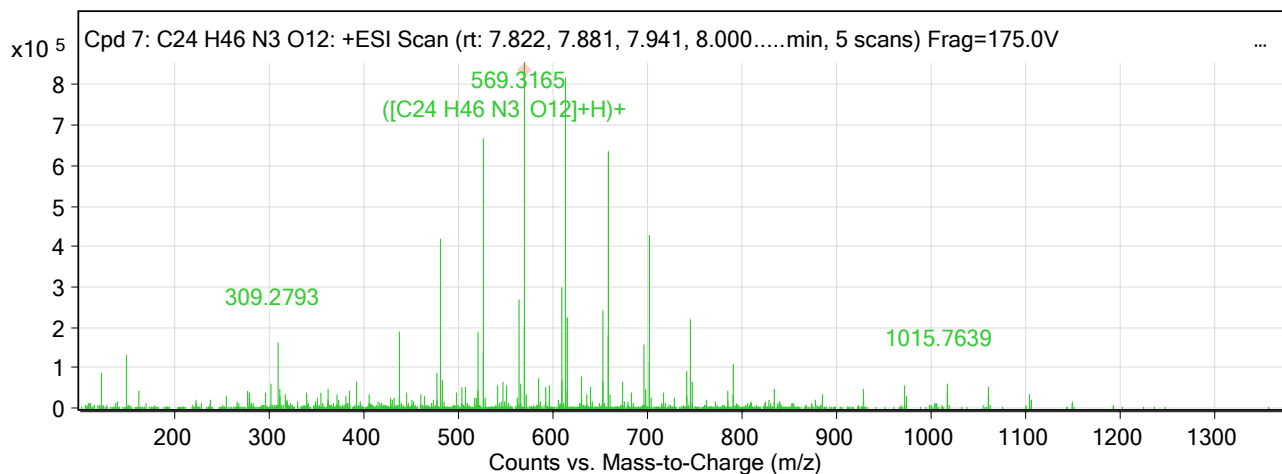

MS Zoomed Spectrum

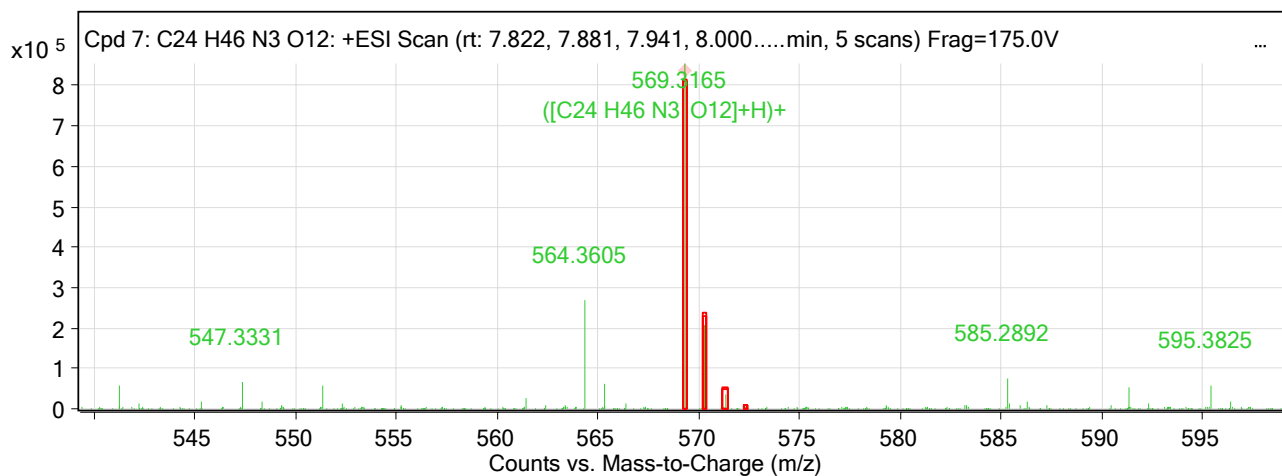

MS Spectrum Peak List

| m/z      | Calc m/z | Diff(ppm) | z | Abund     | Formula        | Ion    |
|----------|----------|-----------|---|-----------|----------------|--------|
| 481.2633 |          |           | 1 | 418216.53 |                |        |
| 525.2904 |          |           | 1 | 666824.44 |                |        |
| 569.3165 | 569.3154 | -1.94     | 1 | 854662.19 | C24 H46 N3 O12 | (M+H)+ |
| 570.3191 | 570.3186 | -0.85     | 1 | 206067.25 | C24 H46 N3 O12 | (M+H)+ |
| 571.3208 | 571.3209 | 0.32      | 1 | 36367.93  | C24 H46 N3 O12 | (M+H)+ |
| 572.3236 | 572.3235 | -0.21     | 1 | 5244.75   | C24 H46 N3 O12 | (M+H)+ |
| 608.3869 |          |           | 1 | 301534.28 |                |        |
| 613.3429 |          |           | 1 | 815728.44 |                |        |

MSMS Spectrum

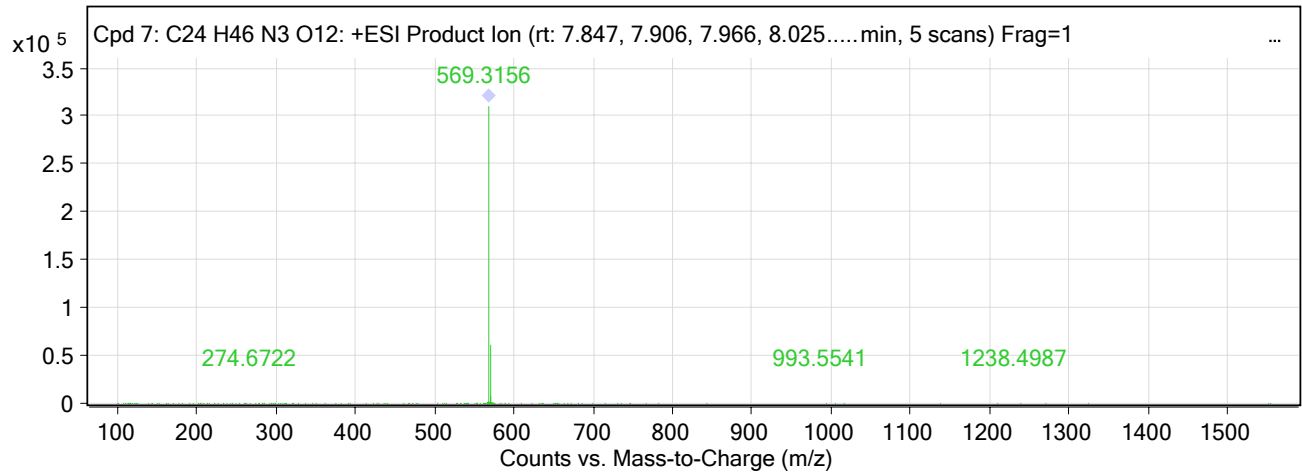

MS/MS Spectrum Peak List

| m/z      | Calc m/z | Diff(ppm) | z | Abund     |
|----------|----------|-----------|---|-----------|
| 115.9964 | 115.9978 | 12.72     |   | 15.36     |
| 123.0422 | 123.0427 | 4.19      |   | 17.8      |
| 164.0824 | 164.0832 | 4.48      |   | 12.47     |
| 181.081  | 181.0819 | 5.14      |   | 28.2      |
| 209.0792 | 209.0768 | -11.43    |   | 17.38     |
| 223.0927 | 223.0925 | -0.86     |   | 13.26     |
| 309.277  | 309.2775 | 1.49      |   | 27.67     |
| 510.2817 | 510.2783 | -6.61     |   | 14.82     |
| 551.2882 | 551.2811 | -12.98    |   | 29.41     |
| 569.3156 | 569.3154 | -0.23     | 1 | 310403.88 |

| Compound Label     | m/z      | RT    | Algorithm  | Mass     |
|--------------------|----------|-------|------------|----------|
| Cpd 8: C28 H52 O14 | 613.3429 | 7.982 | Auto MS/MS | 612.3354 |

Compound Chromatograms

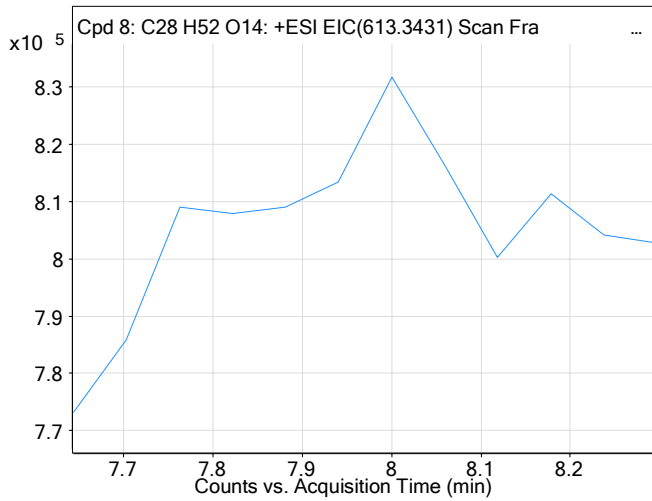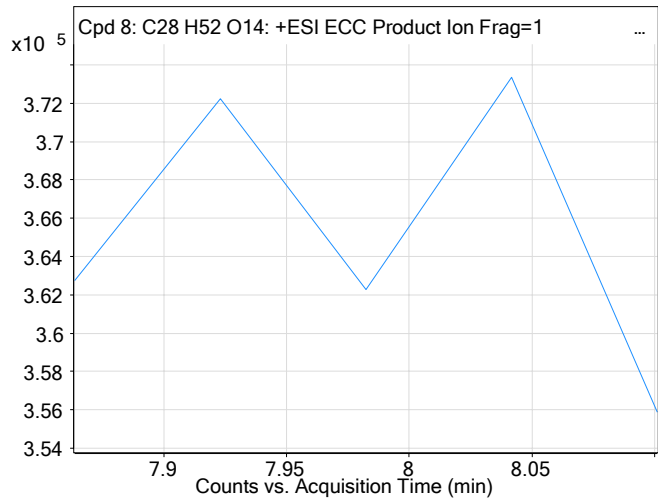

MS Spectrum



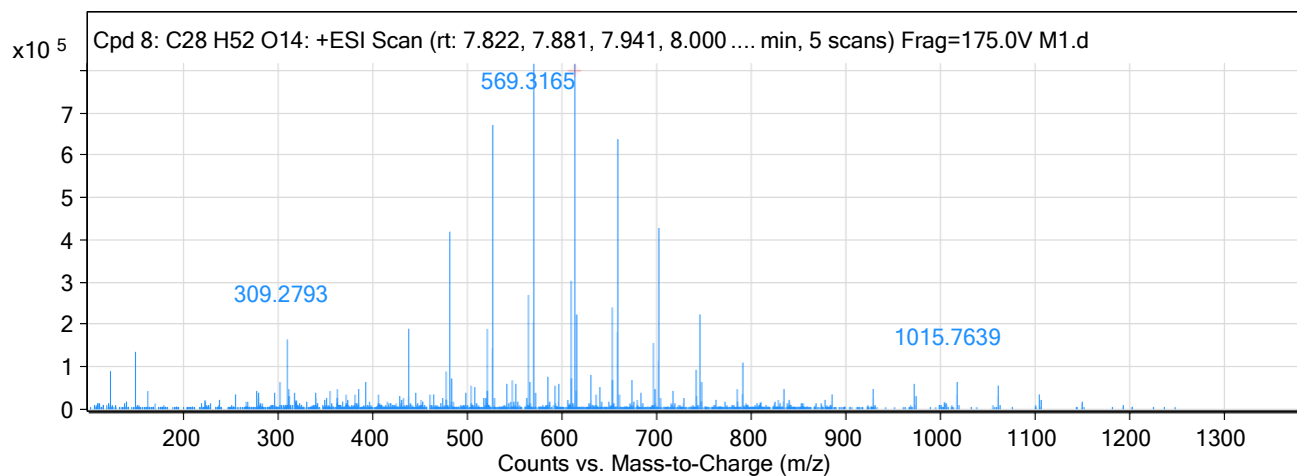

MS Zoomed Spectrum

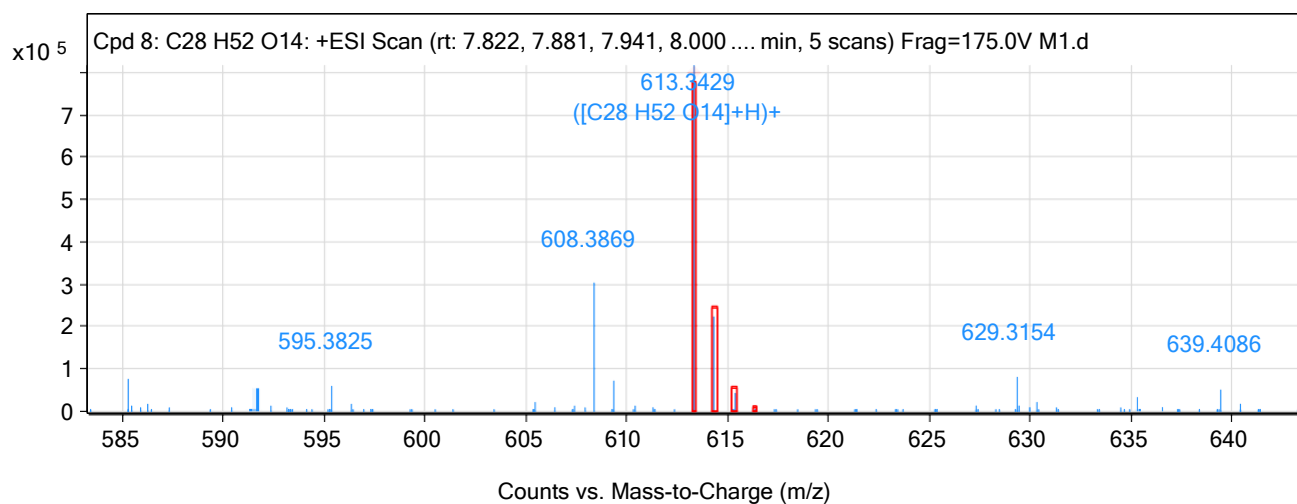

MS Spectrum Peak List

| m/z      | Calc m/z | Diff(ppm) | z | Abund     | Formula     | Ion    |
|----------|----------|-----------|---|-----------|-------------|--------|
| 481.2633 |          |           | 1 | 418216.53 |             |        |
| 525.2904 |          |           | 1 | 666824.44 |             |        |
| 569.3165 |          |           | 1 | 854662.19 |             |        |
| 608.3869 |          |           | 1 | 301534.28 |             |        |
| 613.3429 | 613.343  | 0.07      | 1 | 815728.44 | C28 H52 O14 | (M+H)+ |
| 614.3455 | 614.3464 | 1.4       | 1 | 223819.8  | C28 H52 O14 | (M+H)+ |
| 615.3474 | 615.3489 | 2.35      | 1 | 42158.16  | C28 H52 O14 | (M+H)+ |
| 616.3505 | 616.3515 | 1.67      | 1 | 6091.69   | C28 H52 O14 | (M+H)+ |
| 657.3691 |          |           | 1 | 633670.44 |             |        |
| 701.3951 |          |           | 1 | 426540.5  |             |        |

MSMS Spectrum

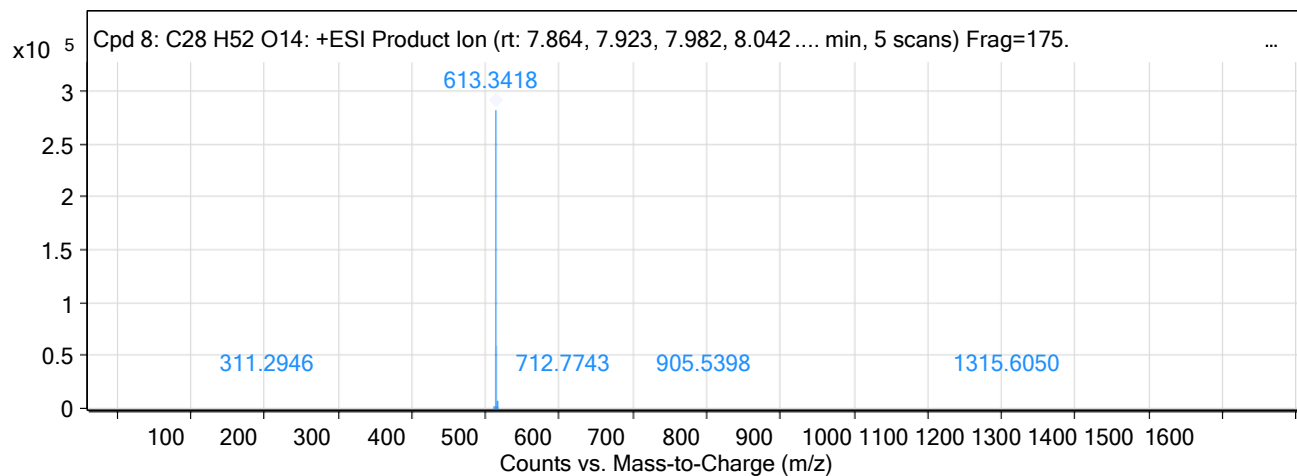

**MS/MS Spectrum Peak List**

| m/z      | Calc m/z | Diff(ppm) | z | Abund     |
|----------|----------|-----------|---|-----------|
| 101.0605 | 101.0597 | -7.94     |   | 25.93     |
| 123.0417 | 123.0441 | 18.89     |   | 16.61     |
| 133.0861 | 133.0859 | -1        |   | 41.7      |
| 137.0576 | 137.0597 | 15.2      |   | 36.92     |
| 137.1331 | 137.1325 | -4.29     |   | 16.64     |
| 169.0869 | 169.0859 | -5.9      |   | 16.36     |
| 177.1117 | 177.1121 | 2.7       |   | 32.11     |
| 221.1384 | 221.1384 | -0.16     |   | 15.9      |
| 309.2789 | 309.2788 | -0.27     | 1 | 91.47     |
| 613.3418 | 613.343  | 1.9       | 1 | 281919.84 |

| Compound Label        | m/z      | RT    | Algorithm  | Mass     |
|-----------------------|----------|-------|------------|----------|
| Cpd 9: C24 H46 N3 O12 | 569.3166 | 8.262 | Auto MS/MS | 568.3091 |

**Compound Chromatograms**

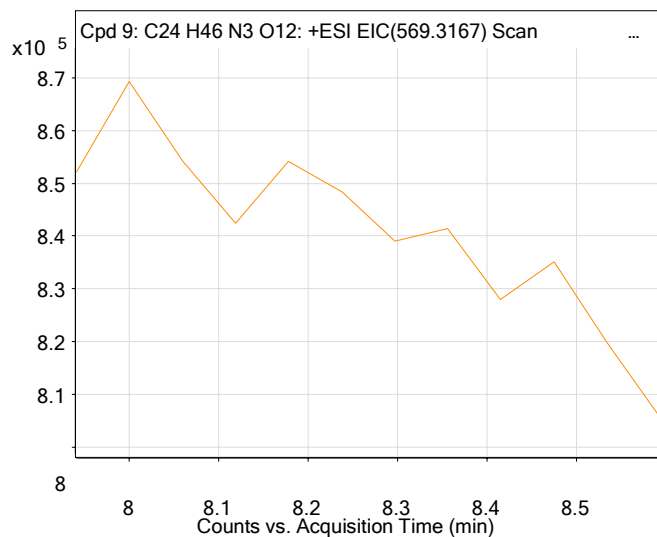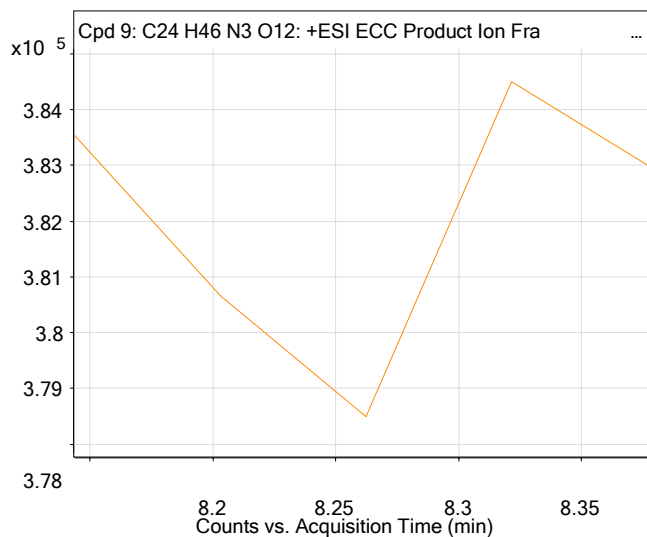

MS Spectrum

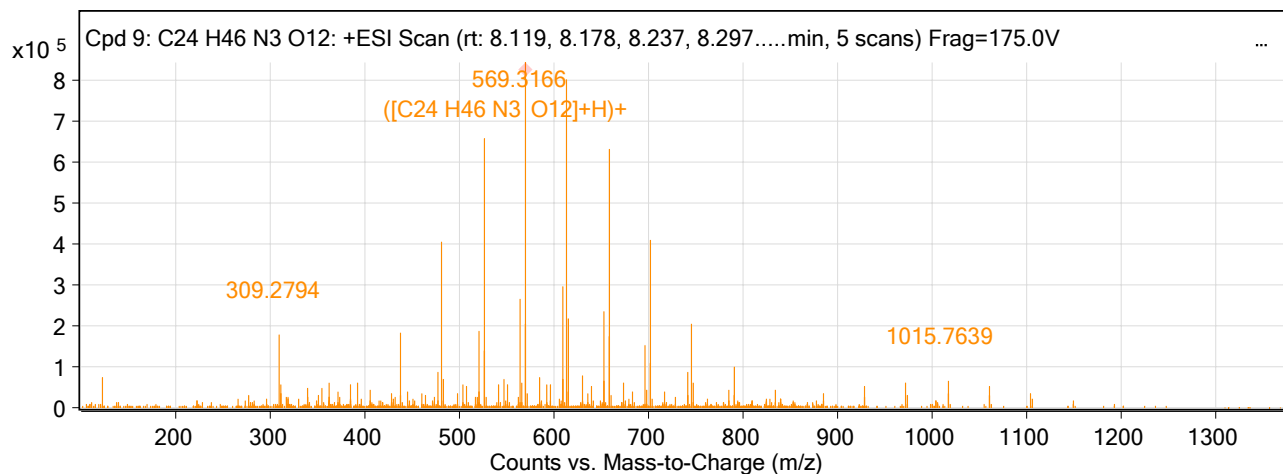

MS Zoomed Spectrum

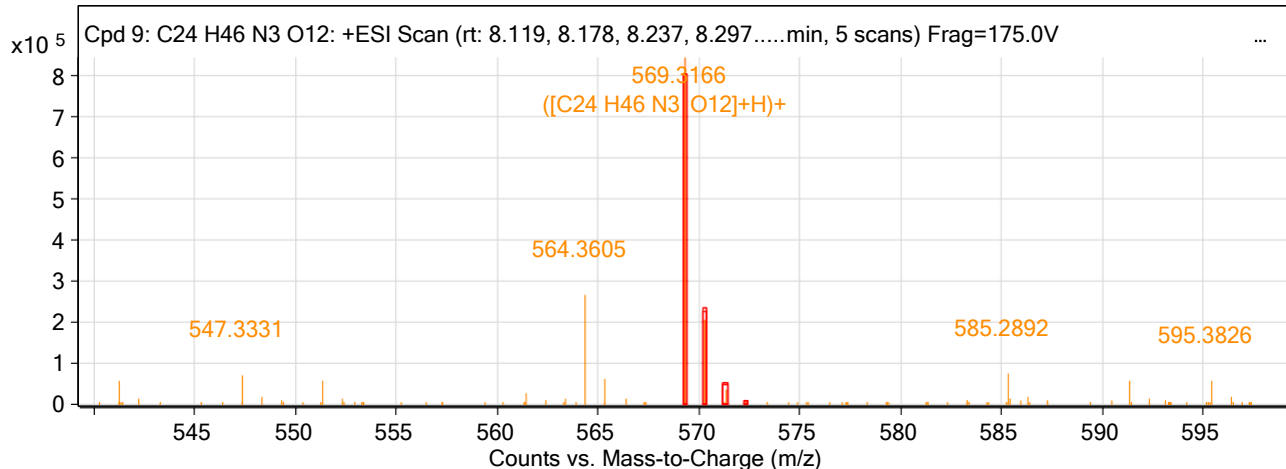

**MS Spectrum Peak List**

| m/z      | Calc m/z | Diff(ppm) | z | Abund     | Formula                                                        | Ion                |
|----------|----------|-----------|---|-----------|----------------------------------------------------------------|--------------------|
| 481.2633 |          |           | 1 | 406037.31 |                                                                |                    |
| 525.2904 |          |           | 1 | 660089.81 |                                                                |                    |
| 569.3166 | 569.3154 | -2.04     | 1 | 845153.81 | C <sub>24</sub> H <sub>46</sub> N <sub>3</sub> O <sub>12</sub> | (M+H) <sup>+</sup> |
| 570.3191 | 570.3186 | -0.91     | 1 | 204008.38 | C <sub>24</sub> H <sub>46</sub> N <sub>3</sub> O <sub>12</sub> | (M+H) <sup>+</sup> |
| 571.3209 | 571.3209 | 0.08      | 1 | 35704.37  | C <sub>24</sub> H <sub>46</sub> N <sub>3</sub> O <sub>12</sub> | (M+H) <sup>+</sup> |
| 572.3234 | 572.3235 | 0.24      | 1 | 5251.58   | C <sub>24</sub> H <sub>46</sub> N <sub>3</sub> O <sub>12</sub> | (M+H) <sup>+</sup> |
| 608.3869 |          |           | 1 | 294750.59 |                                                                |                    |
| 613.343  |          |           | 1 | 802966.44 |                                                                |                    |
| 657.3691 |          |           | 1 | 632231.88 |                                                                |                    |
| 701.3951 |          |           | 1 | 410099.91 |                                                                |                    |

**MSMS Spectrum**

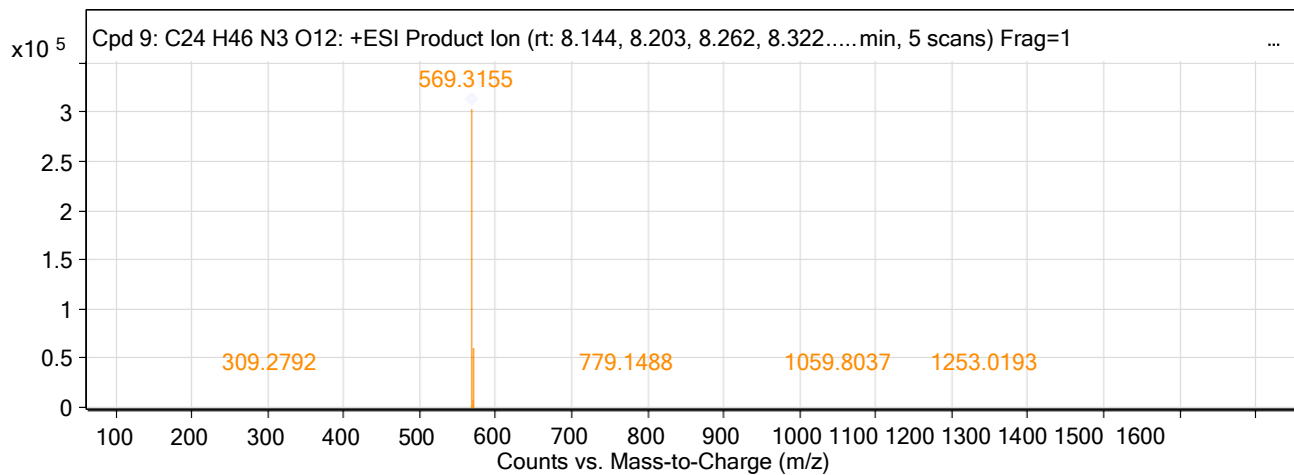

**MS/MS Spectrum PeakList**

| m/z      | Calc m/z | Diff(ppm) | z | Abund     |
|----------|----------|-----------|---|-----------|
| 115.0735 | 115.074  | 4.62      |   | 16.22     |
| 123.0412 | 123.04   | -9.74     |   | 25.55     |
| 133.0849 | 133.0846 | -2.36     |   | 32        |
| 195.0978 | 195.0975 | -1.29     |   | 16.53     |
| 283.2634 | 283.2632 | -0.9      |   | 16.22     |
| 309.2792 | 309.2788 | -1.19     |   | 35.89     |
| 311.2934 | 311.2931 | -1.05     |   | 17.91     |
| 412.2706 | 412.2694 | -2.94     |   | 17.19     |
| 566.298  | 566.292  | -10.65    | 1 | 40.56     |
| 569.3155 | 569.3154 | -0.15     | 1 | 302640.94 |

| Compound Label                                          | m/z     | RT    | Algorithm  | Mass     |
|---------------------------------------------------------|---------|-------|------------|----------|
| Cpd 10: C <sub>28</sub> H <sub>52</sub> O <sub>14</sub> | 613.343 | 8.279 | Auto MS/MS | 612.3355 |

**Compound Chromatograms**

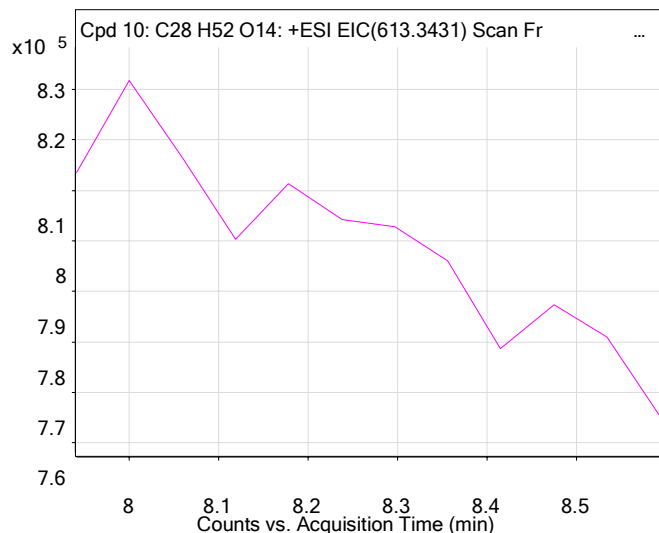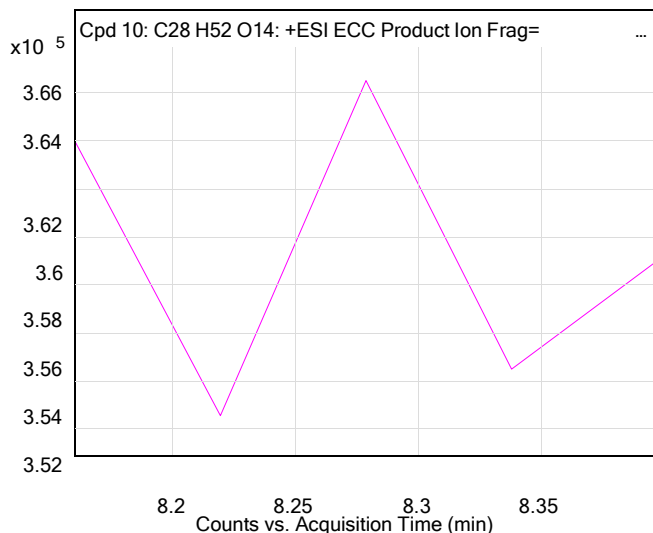

MS Spectrum

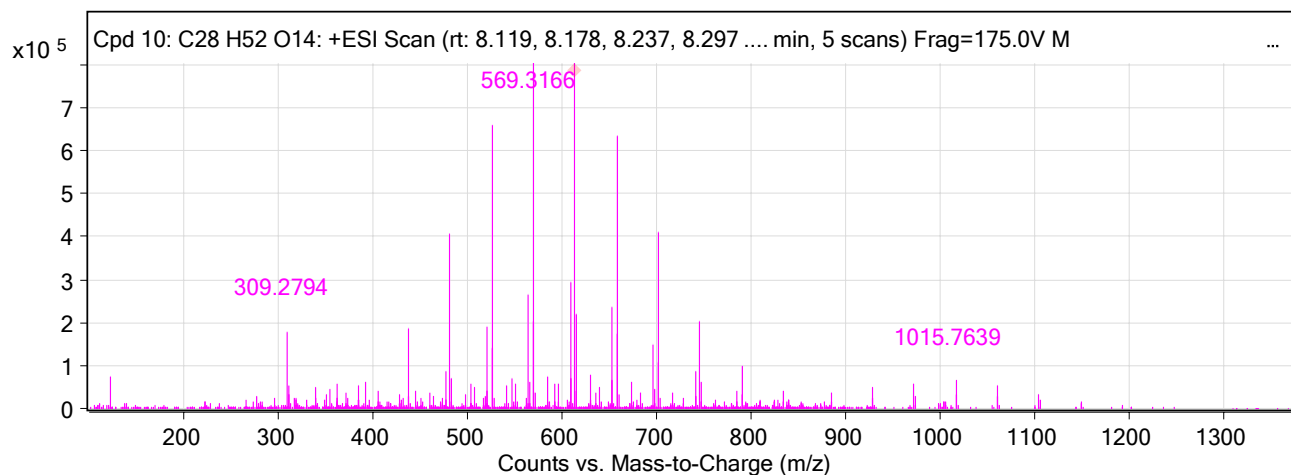

MS Zoomed Spectrum

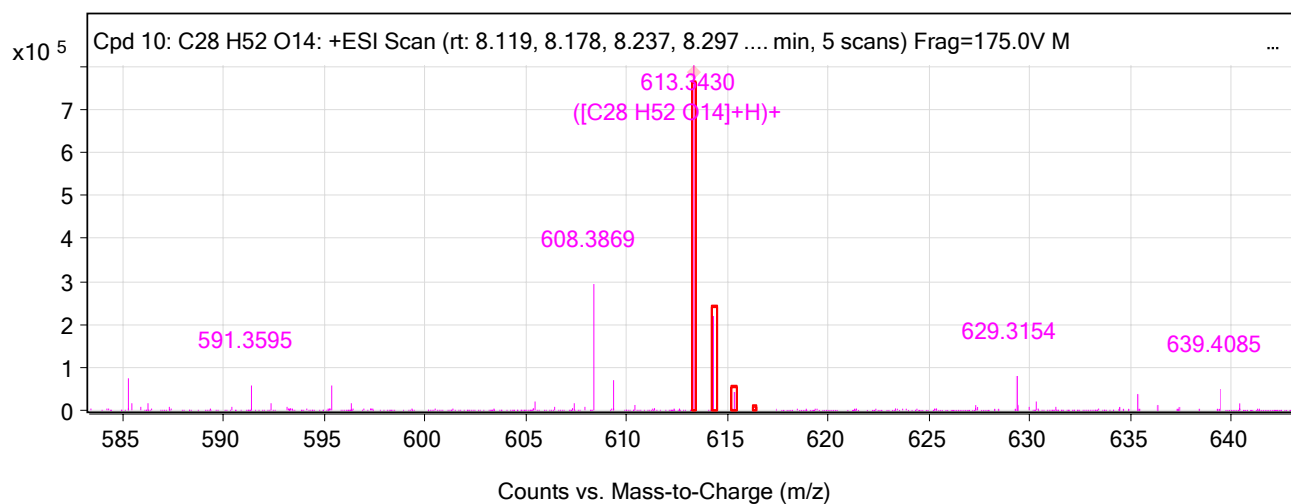

MS Spectrum Peak List

| m/z      | Calc m/z | Diff(ppm) | z | Abund     | Formula     | Ion    |
|----------|----------|-----------|---|-----------|-------------|--------|
| 481.2633 |          |           | 1 | 406037.31 |             |        |
| 525.2904 |          |           | 1 | 660089.81 |             |        |
| 569.3166 |          |           | 1 | 845153.81 |             |        |
| 608.3869 |          |           | 1 | 294750.59 |             |        |
| 613.343  | 613.343  | -0.03     | 1 | 802966.44 | C28 H52 O14 | (M+H)+ |
| 614.3456 | 614.3464 | 1.38      | 1 | 219127.25 | C28 H52 O14 | (M+H)+ |

MSMS Spectrum

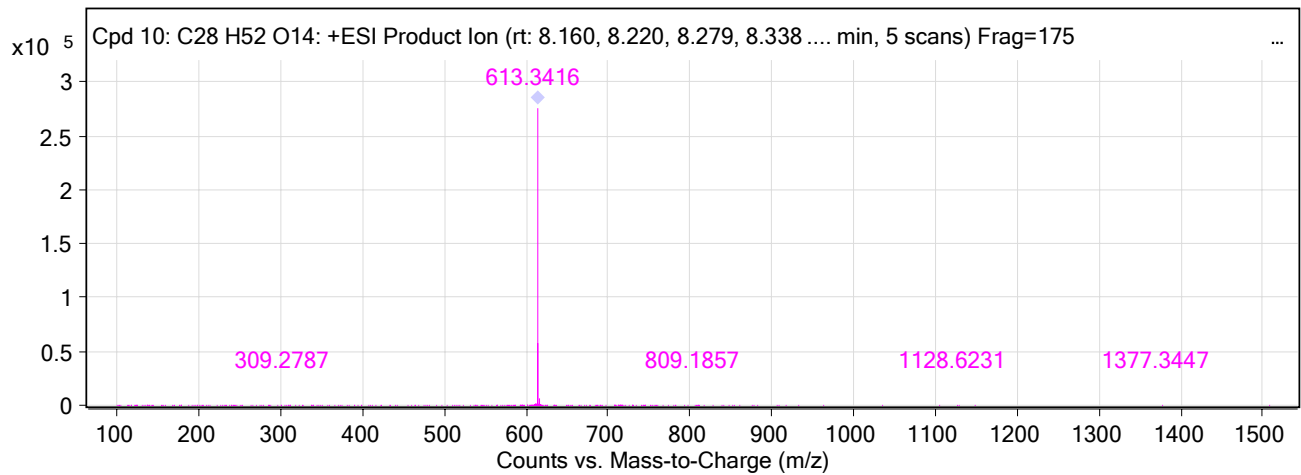

MS/MS Spectrum PeakList

| m/z      | Calc m/z | Diff(ppm)  | z | Abund     |
|----------|----------|------------|---|-----------|
| 133.0852 | 133.0859 | 5.15       |   | 60.94     |
| 137.0566 | 137.0597 | 22.41      |   | 19.82     |
| 177.1135 | 177.1121 | -7.78      |   | 34.1      |
| 199.1273 | 199.1329 | 27.8       |   | 24.51     |
| 210.1158 | 210.1098 | -28.58     |   | 24.86     |
| 309.2787 | 309.2788 | 0.41       | 1 | 146.24    |
| 611.3256 | 305.6634 | -499999.04 | 2 | 33.3      |
| 613.3416 | 613.343  | 2.2        | 1 | 276227.25 |
| 614.3444 |          |            | 1 | 57639.21  |
| 615.3466 |          |            | 1 | 7255.1    |

| Compound Label         | m/z      | RT    | Algorithm  | Mass    |
|------------------------|----------|-------|------------|---------|
| Cpd 11: C24 H46 N3 O12 | 569.3165 | 8.559 | Auto MS/MS | 568.309 |

Compound Chromatograms

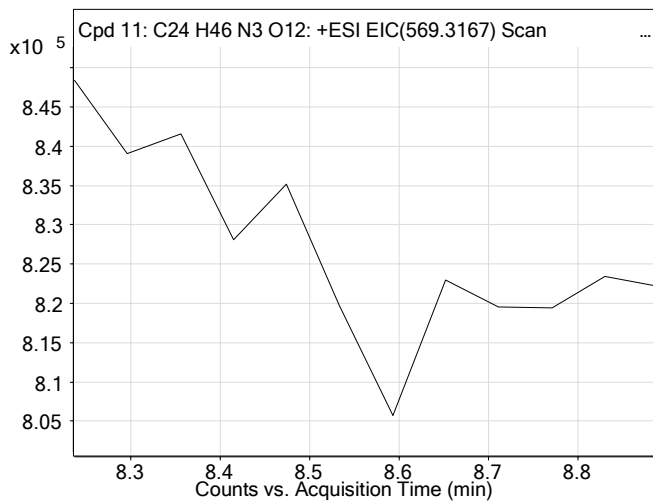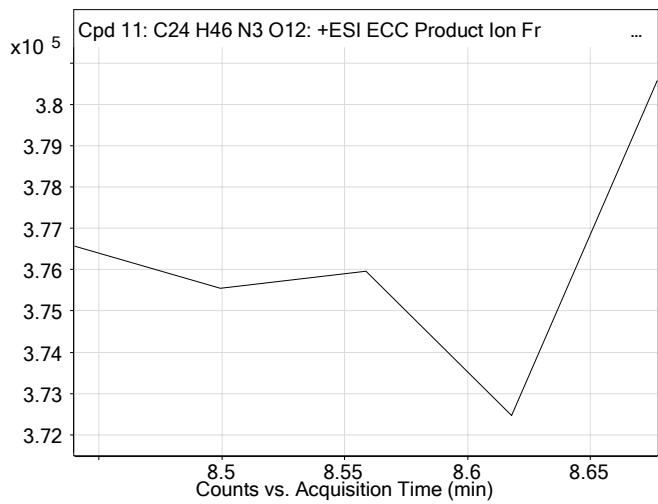

MS Spectrum

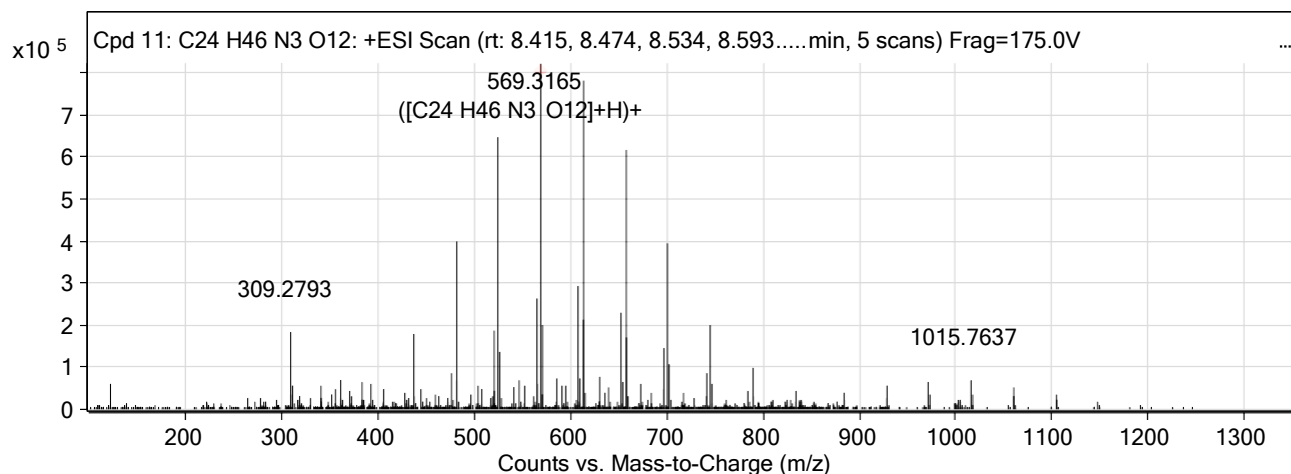

MS Zoomed Spectrum

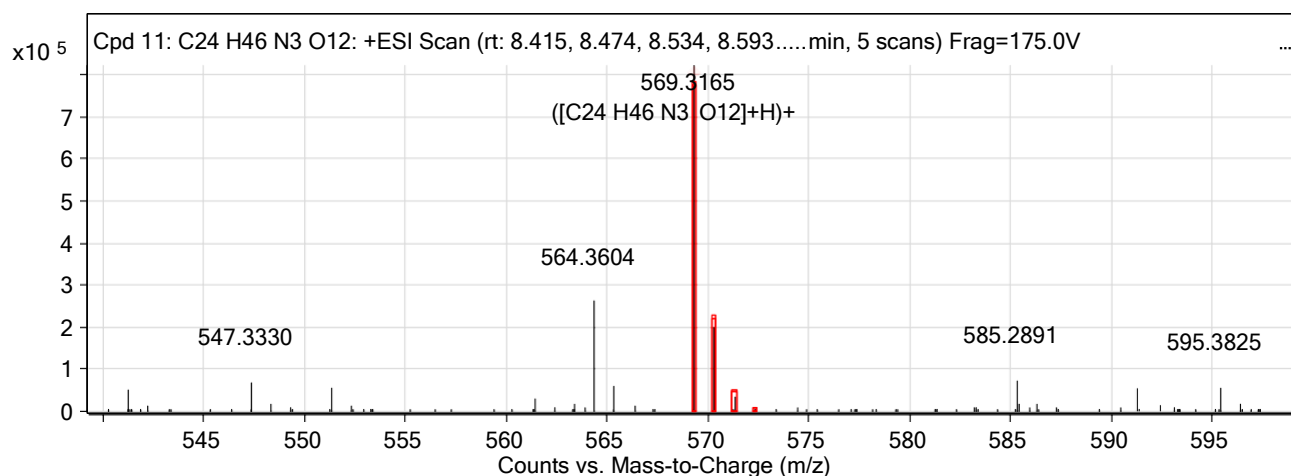

MS Spectrum Peak List

| m/z      | Calc m/z | Diff(ppm) | z | Abund     | Formula                                                        | Ion                |
|----------|----------|-----------|---|-----------|----------------------------------------------------------------|--------------------|
| 481.2631 |          |           | 1 | 400037.78 |                                                                |                    |
| 525.2903 |          |           | 1 | 644123.63 |                                                                |                    |
| 569.3165 | 569.3154 | -1.81     | 1 | 822353.81 | C <sub>24</sub> H <sub>46</sub> N <sub>3</sub> O <sub>12</sub> | (M+H) <sup>+</sup> |
| 570.3119 | 570.3186 | -0.62     | 1 | 198045.33 | C <sub>24</sub> H <sub>46</sub> N <sub>3</sub> O <sub>12</sub> | (M+H) <sup>+</sup> |
| 571.3208 | 571.3209 | 0.31      | 1 | 34914.15  | C <sub>24</sub> H <sub>46</sub> N <sub>3</sub> O <sub>12</sub> | (M+H) <sup>+</sup> |
| 572.3236 | 572.3235 | -0.18     | 1 | 4897.41   | C <sub>24</sub> H <sub>46</sub> N <sub>3</sub> O <sub>12</sub> | (M+H) <sup>+</sup> |
| 608.3868 |          |           | 1 | 291705.75 |                                                                |                    |
| 613.3428 |          |           | 1 | 778573.56 |                                                                |                    |
| 657.3689 |          |           | 1 | 615572.5  |                                                                |                    |
| 701.3949 |          |           | 1 | 393962.06 |                                                                |                    |

MSMS Spectrum

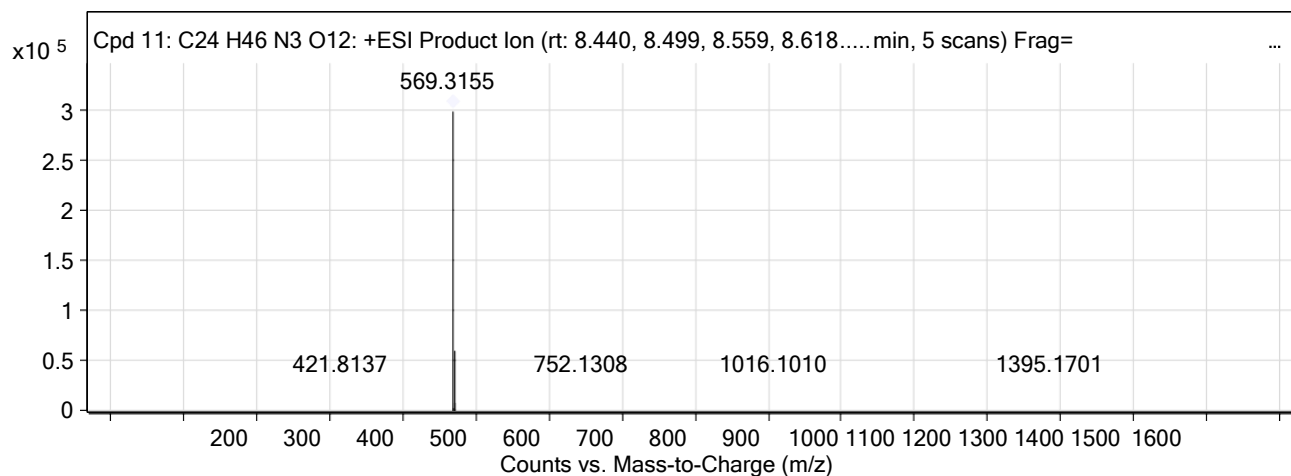

**MS/MS Spectrum Peak List**

| m/z      | Calc m/z | Diff(ppm) | z | Abund     |
|----------|----------|-----------|---|-----------|
| 113.0607 | 113.0597 | -9.2      |   | 14.67     |
| 133.0861 | 133.0859 | -1.07     |   | 25.69     |
| 157.122  | 157.1223 | 2.13      |   | 19.37     |
| 177.1123 | 177.1121 | -1.15     |   | 29.62     |
| 253.1009 | 253.103  | 8.35      |   | 16.01     |
| 311.2946 | 311.2945 | -0.49     |   | 30.64     |
| 312.2966 | 312.3009 | 13.86     |   | 21.93     |
| 431.2857 | 431.2878 | 4.68      |   | 13.67     |
| 566.2916 | 283.1457 | -500000.2 | 2 | 46.44     |
| 569.3155 | 569.3154 | -0.16     | 1 | 298496.94 |

| Compound Label         | m/z      | RT    | Algorithm  | Mass     |
|------------------------|----------|-------|------------|----------|
| Cpd 12: C26 H50 N3 O13 | 613.3428 | 8.575 | Auto MS/MS | 612.3354 |

**Compound Chromatograms**

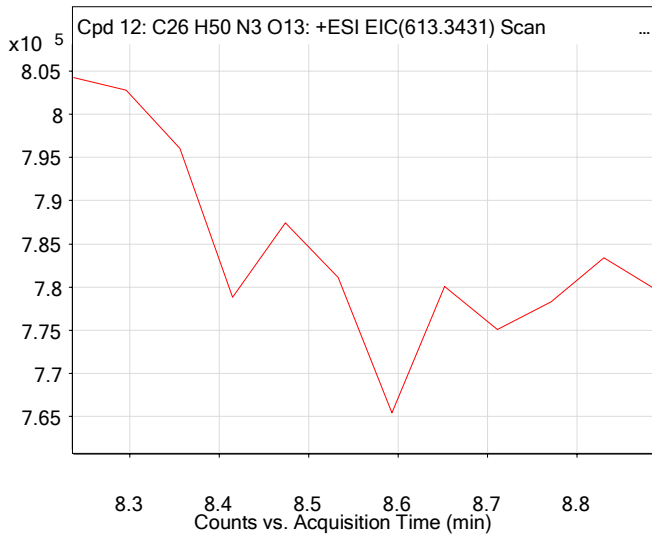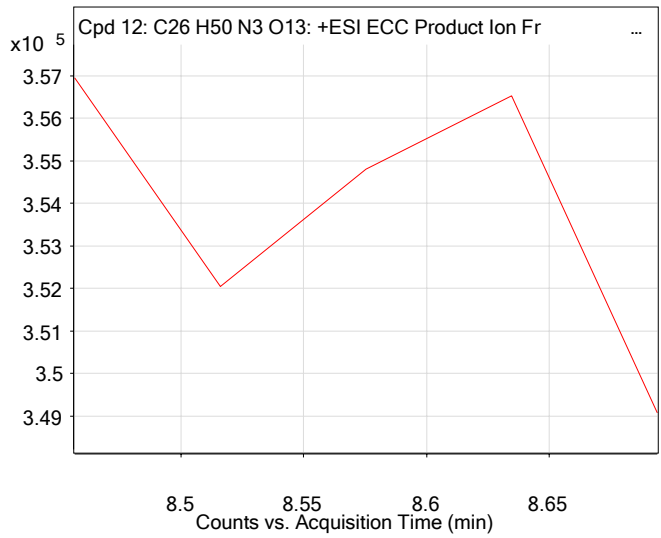

**MS Spectrum**

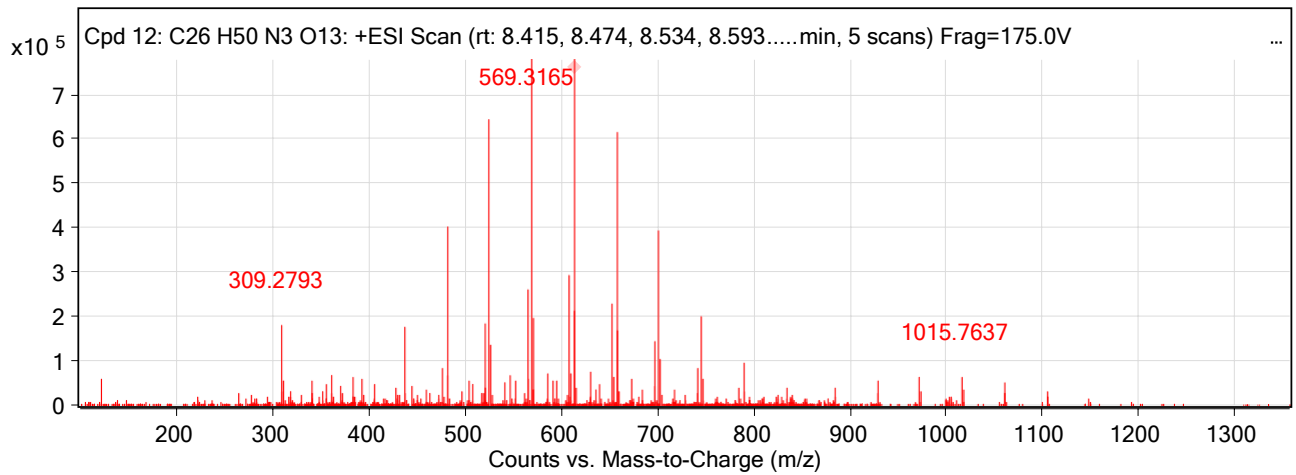

**MS Zoomed Spectrum**

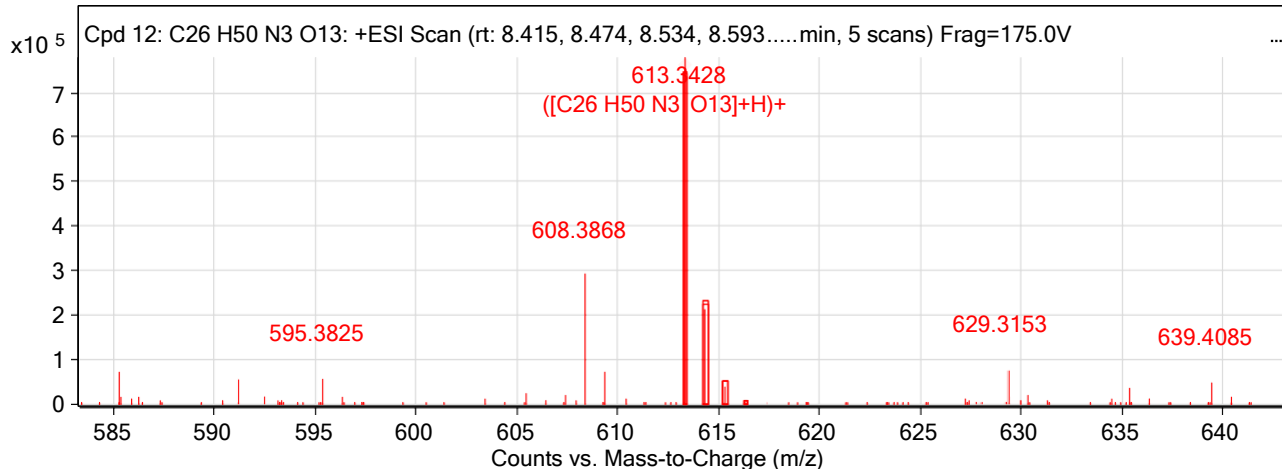

**MS Spectrum Peak List**

| m/z      | Calc m/z | Diff(ppm) | z | Abund     | Formula        | Ion    |
|----------|----------|-----------|---|-----------|----------------|--------|
| 481.2631 |          |           | 1 | 400037.78 |                |        |
| 525.2903 |          |           | 1 | 644123.63 |                |        |
| 569.3165 |          |           | 1 | 822353.81 |                |        |
| 608.3868 |          |           | 1 | 291705.75 |                |        |
| 613.3428 | 613.3416 | -1.89     | 1 | 778573.56 | C26 H50 N3 O13 | (M+H)+ |
| 614.3454 | 614.3448 | -0.86     | 1 | 211248.28 | C26 H50 N3 O13 | (M+H)+ |
| 615.3474 | 615.3472 | -0.22     | 1 | 39722.16  | C26 H50 N3 O13 | (M+H)+ |
| 616.3508 | 616.3498 | -1.58     | 1 | 5955.18   | C26 H50 N3 O13 | (M+H)+ |
| 657.3689 |          |           | 1 | 615572.5  |                |        |
| 701.3949 |          |           | 1 | 393962.06 |                |        |

MSMS Spectrum

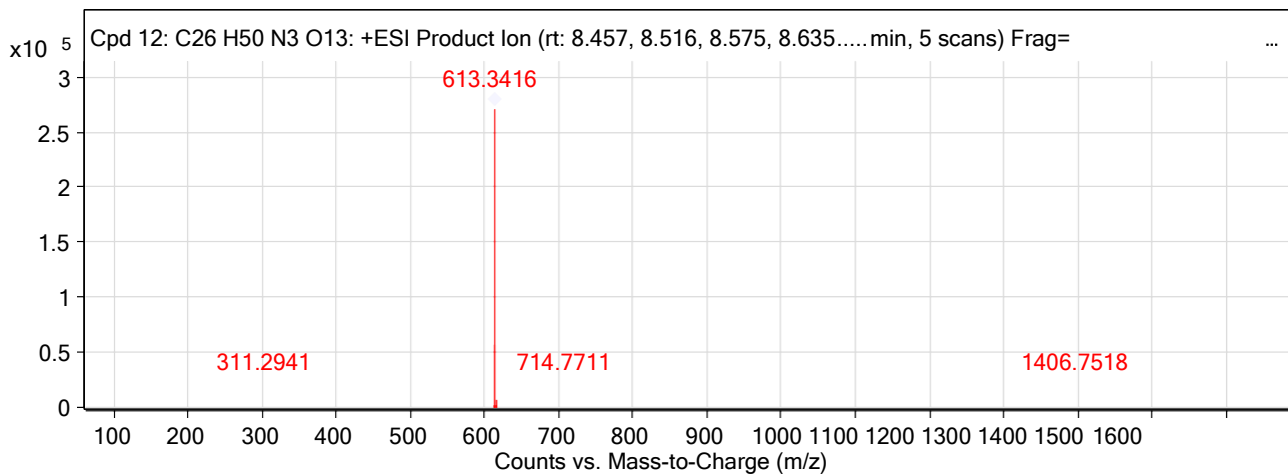

**MS/MS Spectrum Peak List**

| m/z      | Calc m/z | Diff(ppm) | z | Abund     |
|----------|----------|-----------|---|-----------|
| 123.0424 | 123.0427 | 2.8       |   | 27        |
| 133.0855 | 133.0859 | 3.34      | 1 | 48.43     |
| 137.0578 | 137.0584 | 4.03      | 1 | 38.53     |
| 195.1223 | 195.1214 | -5.06     |   | 30.62     |
| 309.2787 | 309.2788 | 0.32      | 1 | 122       |
| 371.2273 | 371.2262 | -2.99     |   | 26.3      |
| 612.3861 |          |           | 2 | 1597.39   |
| 613.3416 | 613.3416 | 0.14      | 1 | 270512.41 |
| 614.3443 |          |           | 1 | 56847.11  |
| 615.3464 |          |           | 1 | 7178.2    |

| Compound Label         | m/z      | RT    | Algorithm  | Mass     |
|------------------------|----------|-------|------------|----------|
| Cpd 13: C24 H46 N3 O12 | 569.3162 | 8.855 | Auto MS/MS | 568.3088 |

**Compound Chromatograms**



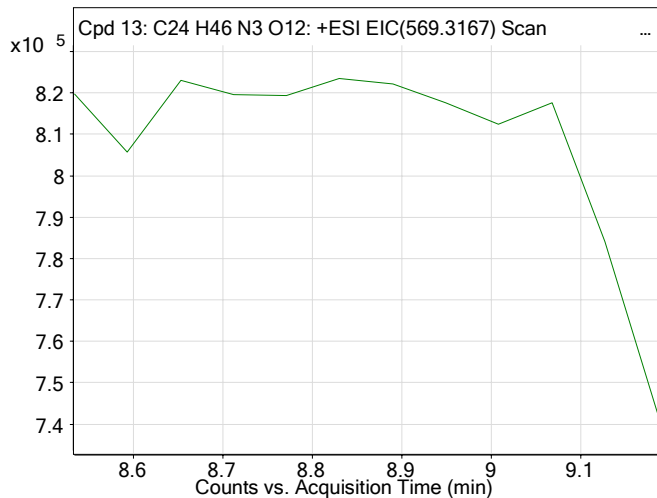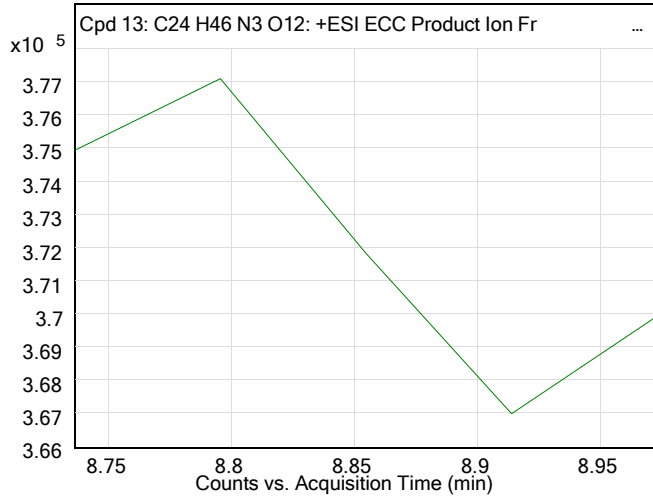

MS Spectrum

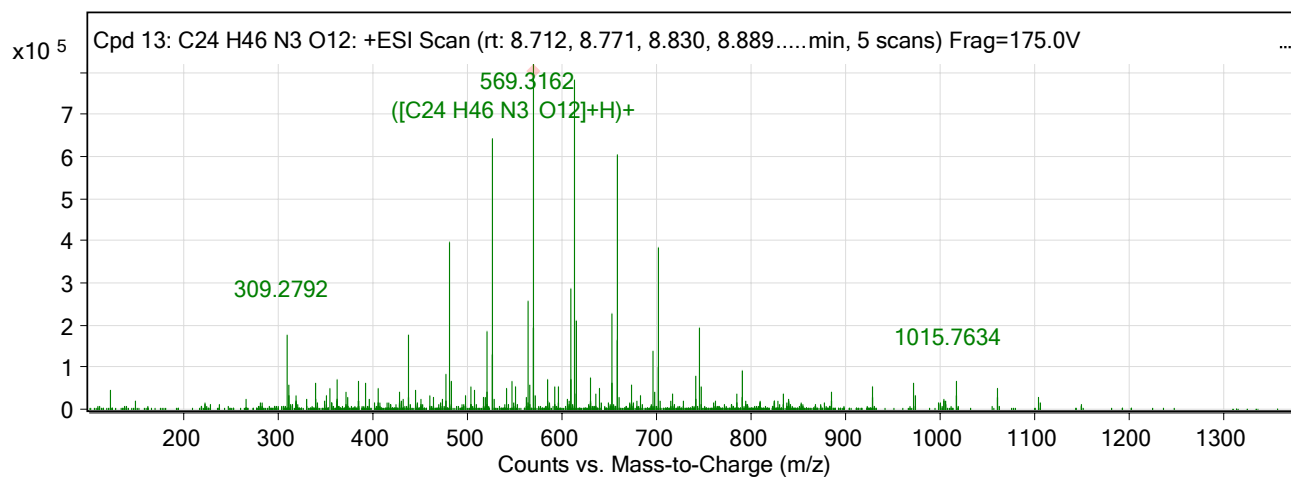

MS Zoomed Spectrum

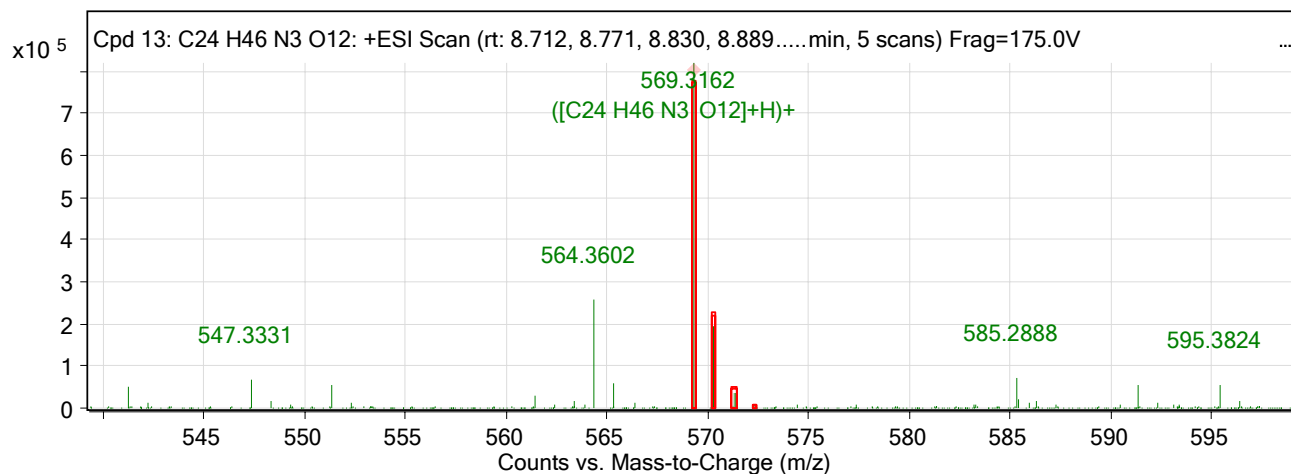

MS Spectrum Peak List

| m/z      | Calc m/z | Diff(ppm) | z | Abund     | Formula                                                        | Ion    |
|----------|----------|-----------|---|-----------|----------------------------------------------------------------|--------|
| 481.263  |          |           | 1 | 398211.56 |                                                                |        |
| 525.2901 |          |           | 1 | 643794.63 |                                                                |        |
| 569.3162 | 569.3154 | -1.39     | 1 | 820458    | C <sub>24</sub> H <sub>46</sub> N <sub>3</sub> O <sub>12</sub> | (M+H)+ |
| 570.3188 | 570.3186 | -0.38     | 1 | 195932.06 | C <sub>24</sub> H <sub>46</sub> N <sub>3</sub> O <sub>12</sub> | (M+H)+ |
| 571.3206 | 571.3209 | 0.57      | 1 | 33755.82  | C <sub>24</sub> H <sub>46</sub> N <sub>3</sub> O <sub>12</sub> | (M+H)+ |
| 572.3231 | 572.3235 | 0.71      | 1 | 5042.35   | C <sub>24</sub> H <sub>46</sub> N <sub>3</sub> O <sub>12</sub> | (M+H)+ |
| 608.3866 |          |           | 1 | 287926.59 |                                                                |        |
| 613.3426 |          |           | 1 | 780660.56 |                                                                |        |
| 657.3686 |          |           | 1 | 603059.38 |                                                                |        |

MSMS Spectrum

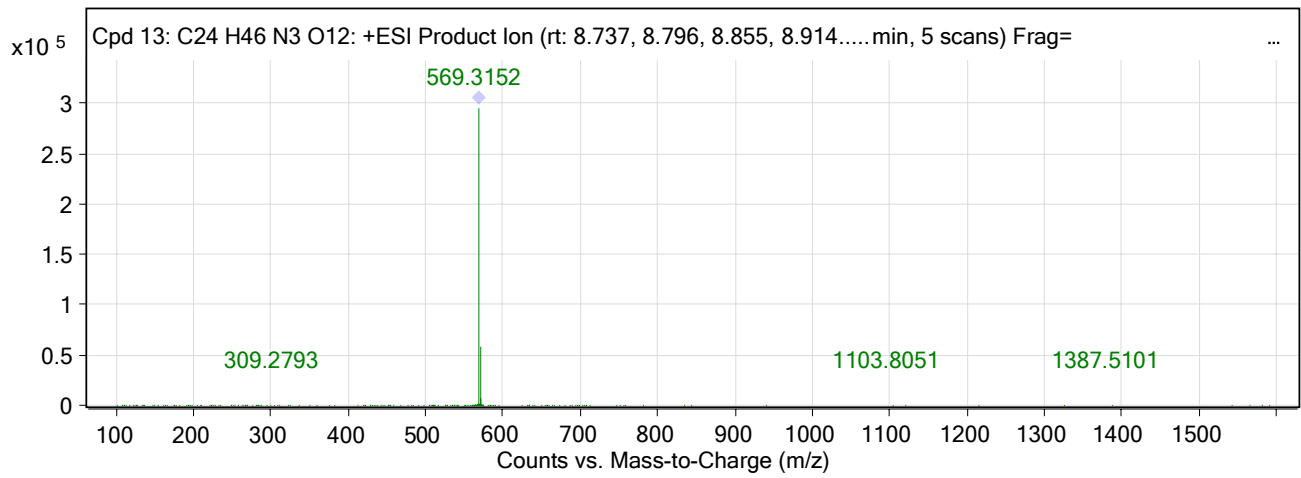

MS/MS Spectrum PeakList

| m/z      | Calc m/z | Diff(ppm) | z | Abund     |
|----------|----------|-----------|---|-----------|
| 101.0607 | 101.0597 | -9.4      |   | 18.82     |
| 117.0909 | 117.091  | 1.14      |   | 15.02     |
| 121.0606 | 121.0608 | 1.14      |   | 16.07     |
| 123.0779 | 123.0791 | 9.77      |   | 12.28     |
| 209.077  | 209.0768 | -0.82     |   | 18.45     |
| 265.1639 | 265.1646 | 2.35      |   | 17.92     |
| 309.2793 | 309.2788 | -1.59     |   | 56.67     |
| 311.2943 | 311.2945 | 0.35      |   | 32.37     |
| 568.2999 | 568.3076 | 13.56     | 1 | 191.37    |
| 569.3152 | 569.3154 | 0.34      | 1 | 295479.19 |

| Compound Label                                                         | m/z      | RT    | Algorithm  | Mass     |
|------------------------------------------------------------------------|----------|-------|------------|----------|
| Cpd 14: C <sub>26</sub> H <sub>50</sub> N <sub>3</sub> O <sub>13</sub> | 613.3426 | 8.872 | Auto MS/MS | 612.3351 |

Compound Chromatograms

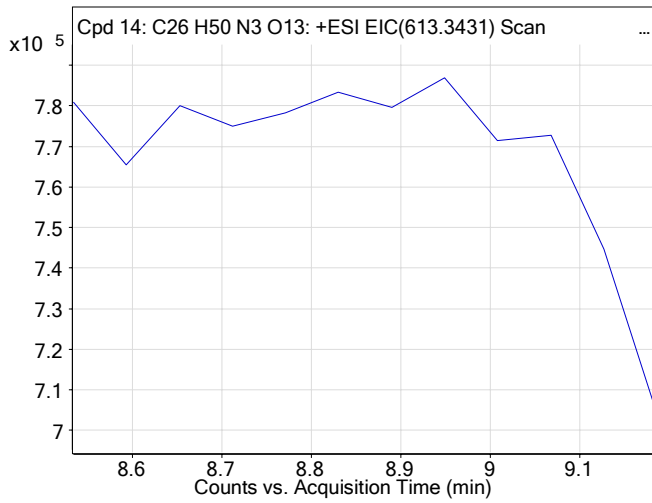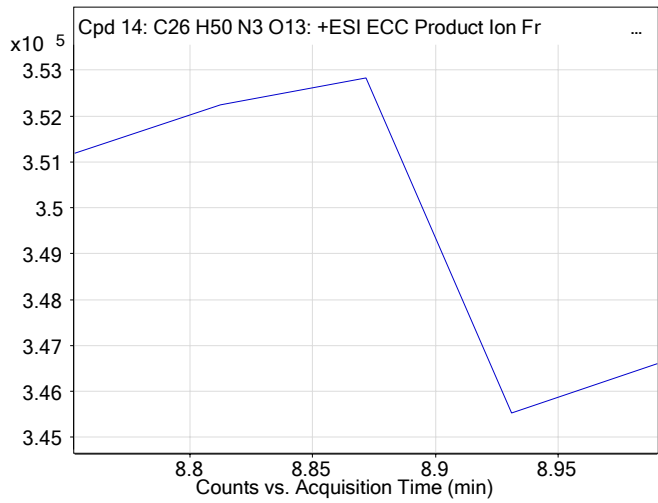

MS Spectrum

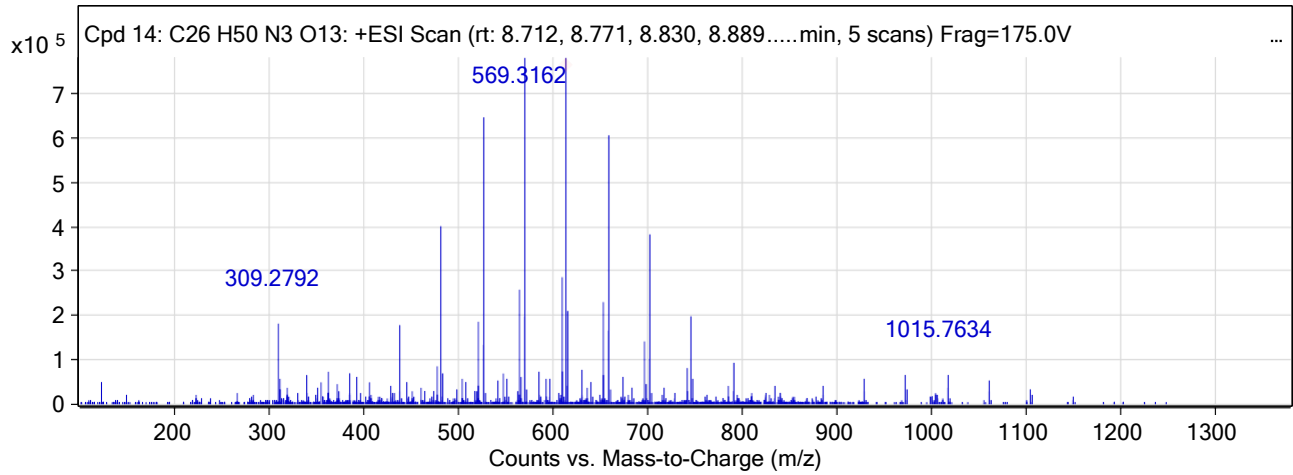

MS Zoomed Spectrum

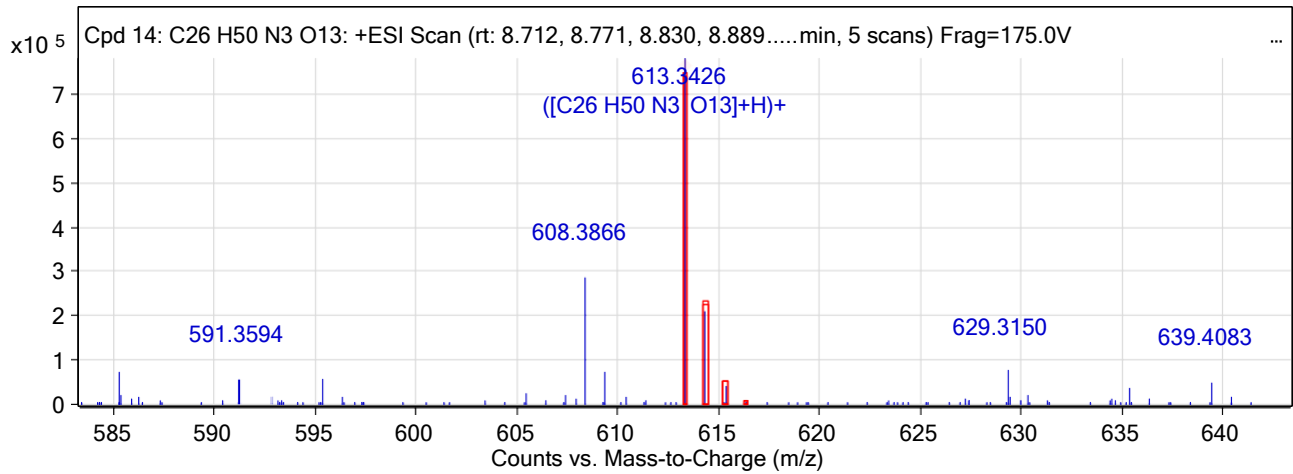

MS Spectrum Peak List

| m/z      | Calc m/z | Diff(ppm) | z | Abund     | Formula                                                        | Ion                |
|----------|----------|-----------|---|-----------|----------------------------------------------------------------|--------------------|
| 481.263  |          |           | 1 | 398211.56 |                                                                |                    |
| 525.2901 |          |           | 1 | 643794.63 |                                                                |                    |
| 569.3162 |          |           | 1 | 820458    |                                                                |                    |
| 608.3866 |          |           | 1 | 287926.59 |                                                                |                    |
| 613.3426 | 613.3416 | -1.53     | 1 | 780660.56 | C <sub>26</sub> H <sub>50</sub> N <sub>3</sub> O <sub>13</sub> | (M+H) <sup>+</sup> |
| 614.3452 | 614.3448 | -0.64     | 1 | 210532.34 | C <sub>26</sub> H <sub>50</sub> N <sub>3</sub> O <sub>13</sub> | (M+H) <sup>+</sup> |
| 615.3471 | 615.3472 | 0.25      | 1 | 39098.23  | C <sub>26</sub> H <sub>50</sub> N <sub>3</sub> O <sub>13</sub> | (M+H) <sup>+</sup> |
| 616.3507 | 616.3498 | -1.42     | 1 | 5449.26   | C <sub>26</sub> H <sub>50</sub> N <sub>3</sub> O <sub>13</sub> | (M+H) <sup>+</sup> |
| 657.3686 |          |           | 1 | 603059.38 |                                                                |                    |
| 701.3947 |          |           | 1 | 384189.75 |                                                                |                    |

MSMS Spectrum

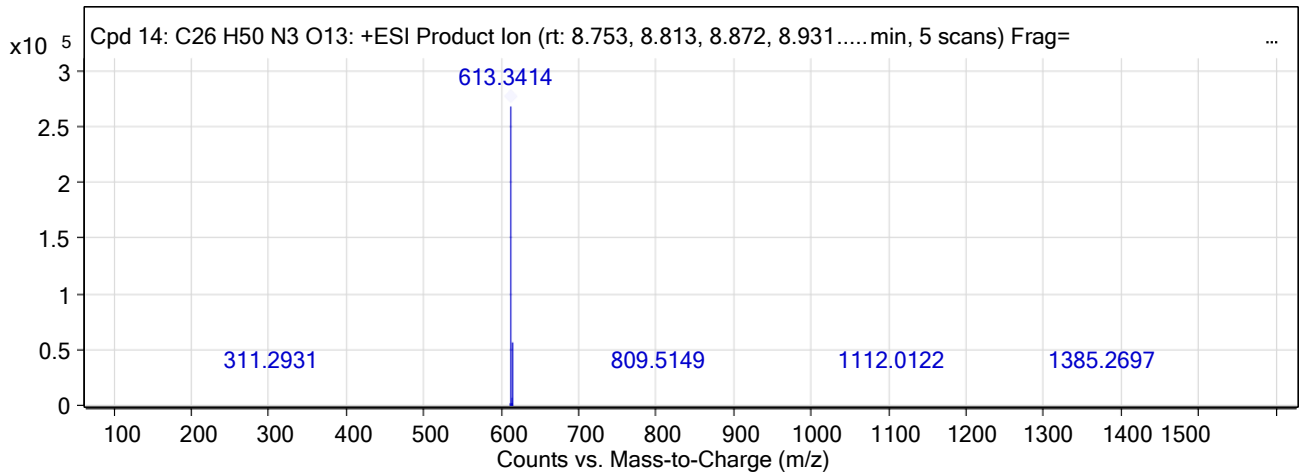

**MS/MS Spectrum Peak List**

| m/z      | Calc m/z | Diff(ppm) | z | Abund     |
|----------|----------|-----------|---|-----------|
| 133.0852 | 133.0846 | -4.96     |   | 39.14     |
| 134.089  | 134.0924 | 25.15     |   | 20.5      |
| 144.0754 | 144.0768 | 9.24      |   | 29.95     |
| 223.0637 | 223.0687 | 22.36     |   | 19.75     |
| 239.1459 | 239.1476 | 6.98      |   | 22.58     |
| 309.2799 | 309.2788 | -3.47     | 1 | 125.06    |
| 377.2136 | 377.2157 | 5.52      |   | 20.39     |
| 613.3414 | 613.3416 | 0.44      | 1 | 267720.41 |
| 614.3441 |          |           | 1 | 55749.68  |
| 615.3463 |          |           | 1 | 7028.53   |

| Compound Label      | m/z      | RT    | Algorithm  | Mass     |
|---------------------|----------|-------|------------|----------|
| Cpd 15: C26 H48 O13 | 569.3167 | 9.152 | Auto MS/MS | 568.3092 |

**Compound Chromatograms**

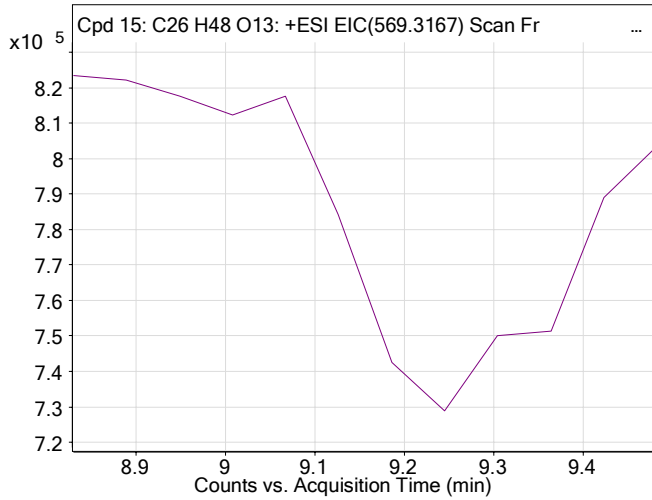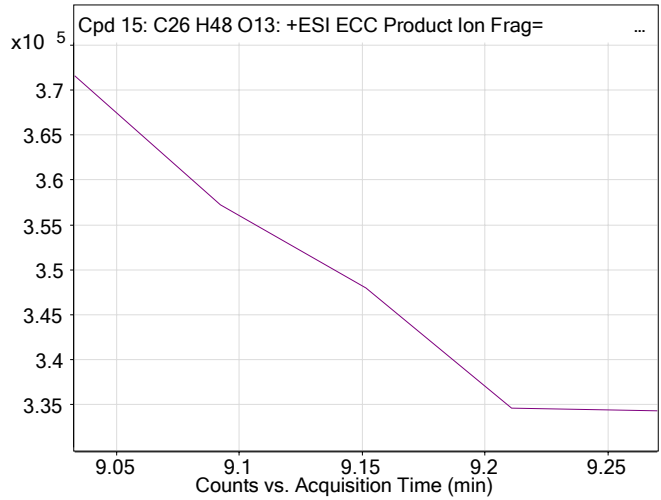

MS Spectrum

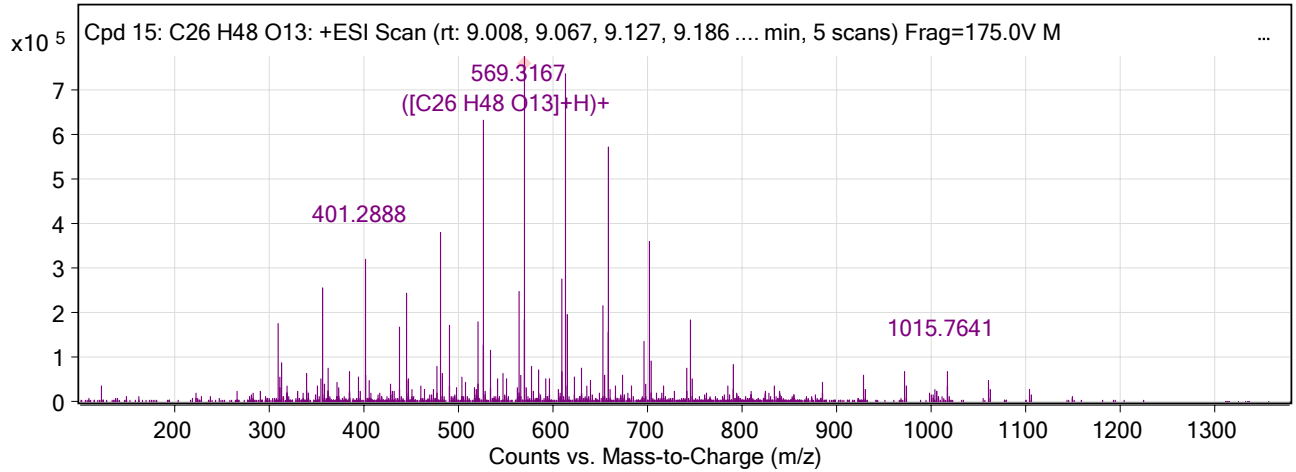

MS Zoomed Spectrum

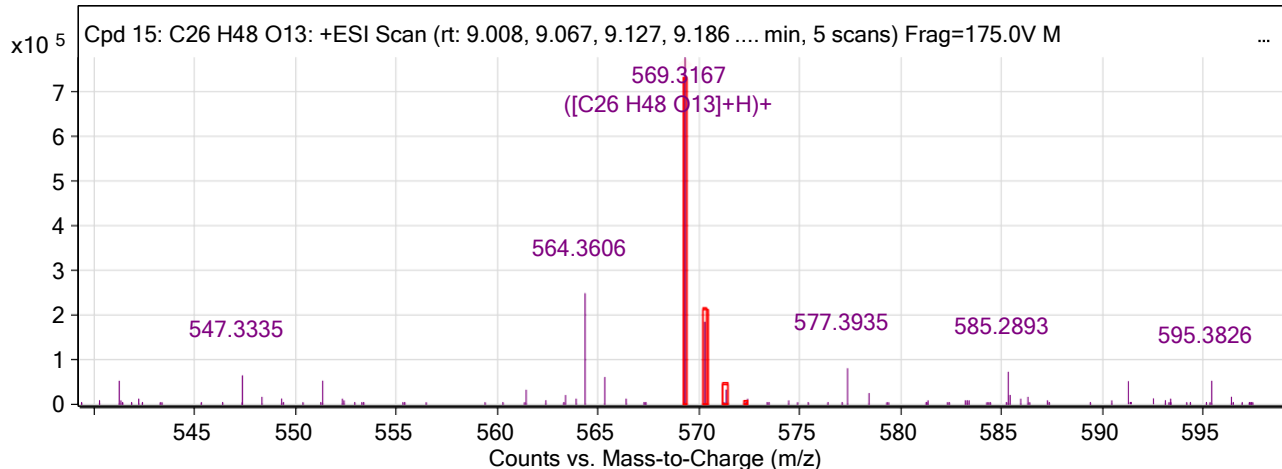

**MS Spectrum Peak List**

| m/z      | Calc m/z | Diff(ppm) | z | Abund     | Formula     | Ion    |
|----------|----------|-----------|---|-----------|-------------|--------|
| 401.2888 |          |           | 1 | 322013    |             |        |
| 481.2634 |          |           | 1 | 380988    |             |        |
| 525.2902 |          |           | 1 | 633922.19 |             |        |
| 569.3167 | 569.3168 | 0.11      | 1 | 777143.5  | C26 H48 O13 | (M+H)+ |
| 570.3192 | 570.3202 | 1.71      | 1 | 186423.81 | C26 H48 O13 | (M+H)+ |
| 571.3212 | 571.3226 | 2.39      | 1 | 32550.71  | C26 H48 O13 | (M+H)+ |
| 572.3239 | 572.3253 | 2.38      | 1 | 4694.65   | C26 H48 O13 | (M+H)+ |
| 613.3432 |          |           | 1 | 737040.31 |             |        |
| 657.3692 |          |           | 1 | 572170.13 |             |        |
| 701.3953 |          |           | 1 | 359118    |             |        |

**MS/MS Spectrum**

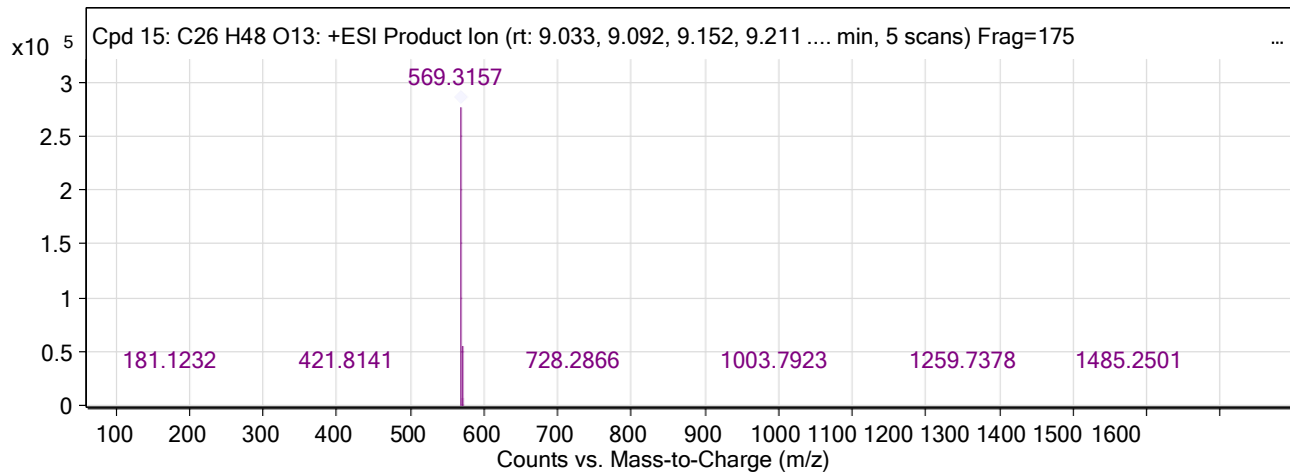

**MS/MS Spectrum Peak List**

| m/z      | Calc m/z | Diff(ppm)  | z | Abund     |
|----------|----------|------------|---|-----------|
| 133.087  | 133.0859 | -8.2       |   | 18.81     |
| 137.0542 | 137.0597 | 40.01      |   | 15.15     |
| 175.133  | 175.1329 | -0.78      |   | 18.83     |
| 181.1232 | 181.1223 | -4.82      |   | 20.84     |
| 283.2637 | 283.2632 | -1.79      | 1 | 44.42     |
| 309.277  | 309.2788 | 5.86       |   | 29.05     |
| 310.2857 | 310.2866 | 3.02       | 1 | 18.47     |
| 566.3013 | 283.1464 | -500007.59 | 2 | 22.42     |
| 568.3026 | 284.1542 | -499994.88 | 2 | 232.65    |
| 569.3157 | 569.3168 | 1.91       | 1 | 276593.31 |

| Compound Label         | m/z      | RT    | Algorithm  | Mass     |
|------------------------|----------|-------|------------|----------|
| Cpd 16: C24 H46 N3 O12 | 569.3161 | 9.448 | Auto MS/MS | 568.3087 |

**Compound Chromatograms**

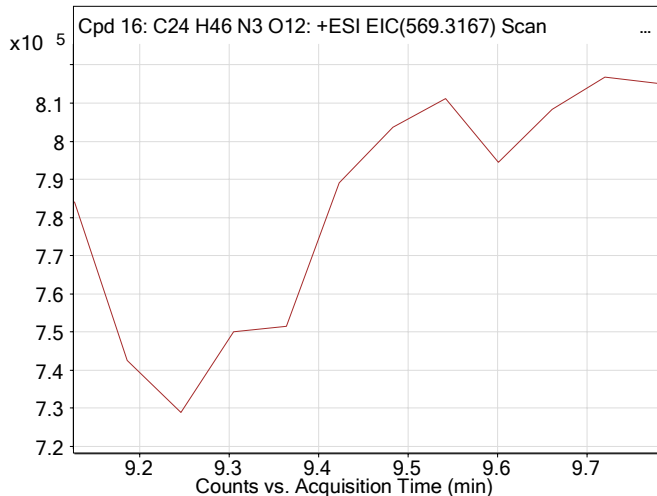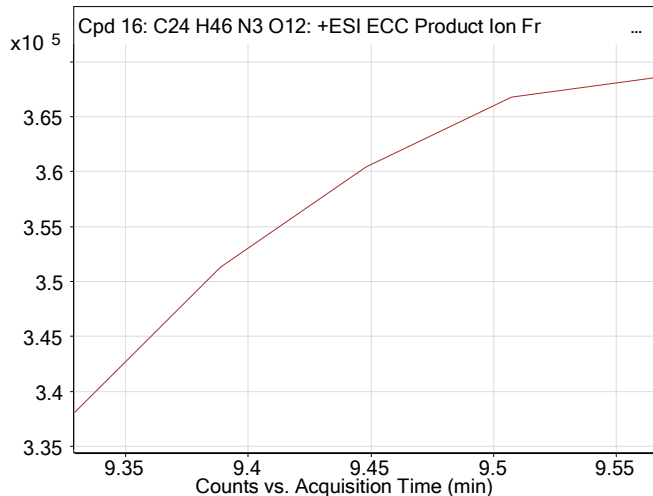

MS Spectrum

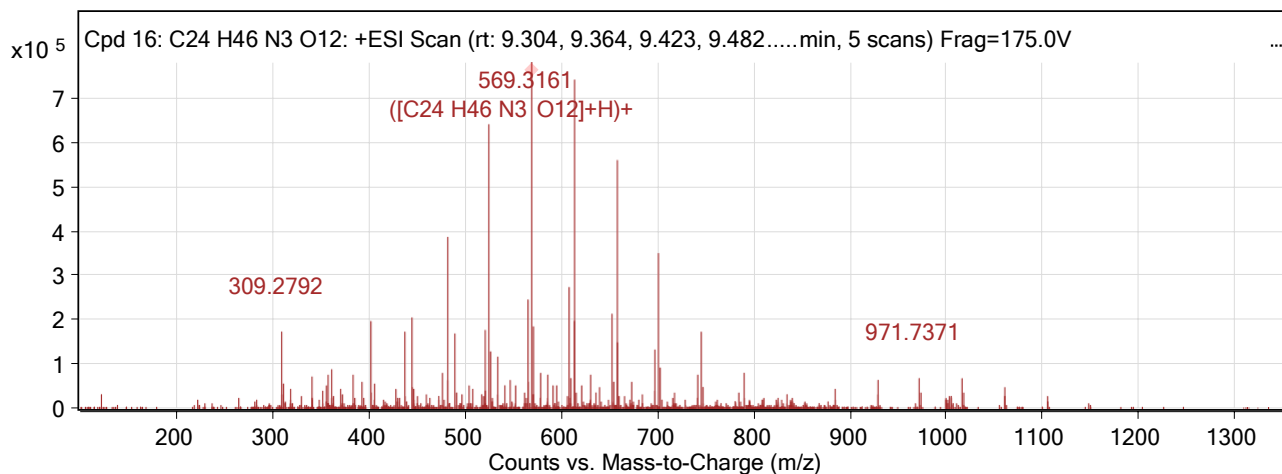

MS Zoomed Spectrum

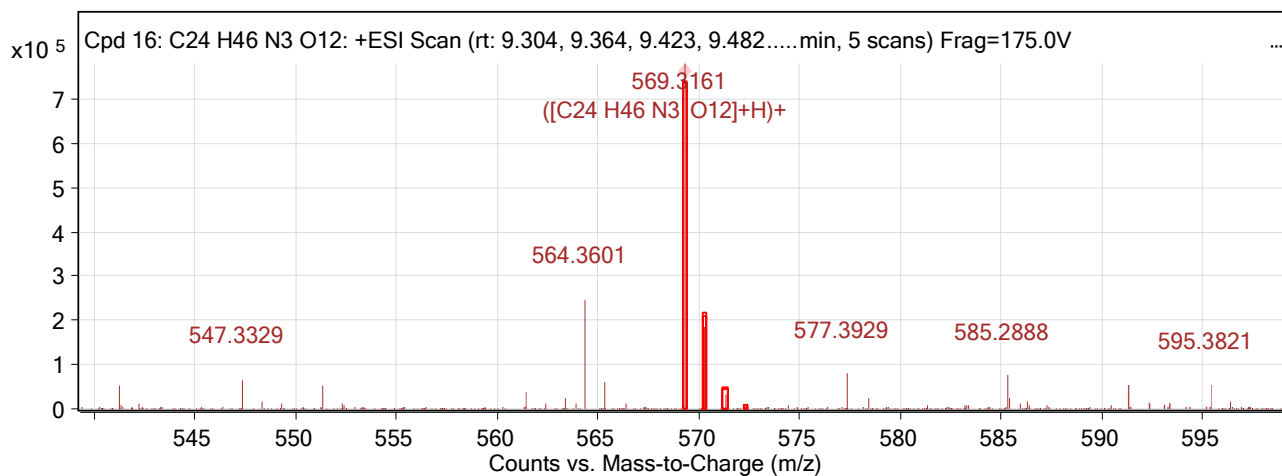

MS Spectrum Peak List

| m/z      | Calc m/z | Diff(ppm) | z | Abund     | Formula        | Ion    |
|----------|----------|-----------|---|-----------|----------------|--------|
| 481.2629 |          |           | 1 | 386254.5  |                |        |
| 525.2897 |          |           | 1 | 641333.38 |                |        |
| 569.3161 | 569.3154 | -1.25     | 1 | 781101.31 | C24 H46 N3 O12 | (M+H)+ |
| 570.3187 | 570.3186 | -0.18     | 1 | 184962.52 | C24 H46 N3 O12 | (M+H)+ |
| 571.3205 | 571.3209 | 0.73      | 1 | 31408.57  | C24 H46 N3 O12 | (M+H)+ |
| 572.324  | 572.3235 | -0.78     | 1 | 4724.56   | C24 H46 N3 O12 | (M+H)+ |
| 608.3865 |          |           | 1 | 273219.44 |                |        |
| 613.3426 |          |           | 1 | 740289    |                |        |

MSMS Spectrum

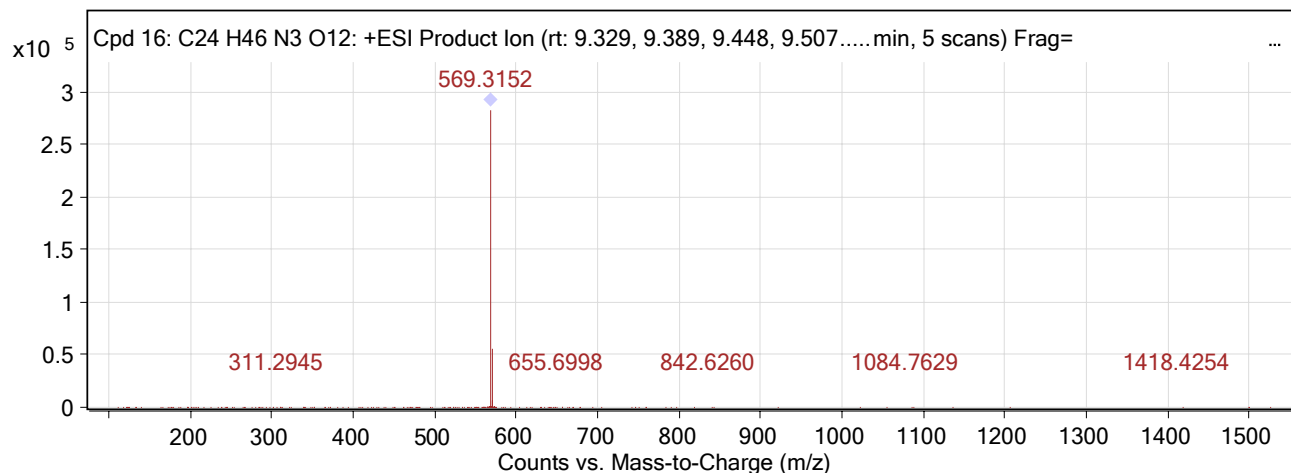

MS/MS Spectrum Peak List

| m/z      | Calc m/z | Diff(ppm) | z | Abund     |
|----------|----------|-----------|---|-----------|
| 111.0809 | 111.0804 | -4.46     |   | 12.27     |
| 117.0909 | 117.091  | 0.52      |   | 25.65     |
| 175.1324 | 175.1329 | 2.55      | 1 | 26.33     |
| 209.1107 | 209.1132 | 12.18     |   | 12.63     |
| 243.1508 | 243.1465 | -17.45    |   | 11.95     |
| 283.2621 | 283.2618 | -0.91     |   | 23.2      |
| 309.276  | 309.2775 | 4.83      |   | 15.71     |
| 311.2945 | 311.2945 | -0.14     |   | 33.1      |
| 408.3086 | 408.3082 | -1.15     |   | 16.03     |
| 569.3152 | 569.3154 | 0.4       | 1 | 283153.81 |

| Compound Label                                                         | m/z      | RT    | Algorithm  | Mass     |
|------------------------------------------------------------------------|----------|-------|------------|----------|
| Cpd 17: C <sub>24</sub> H <sub>46</sub> N <sub>3</sub> O <sub>12</sub> | 569.3166 | 9.744 | Auto MS/MS | 568.3092 |

Compound Chromatograms

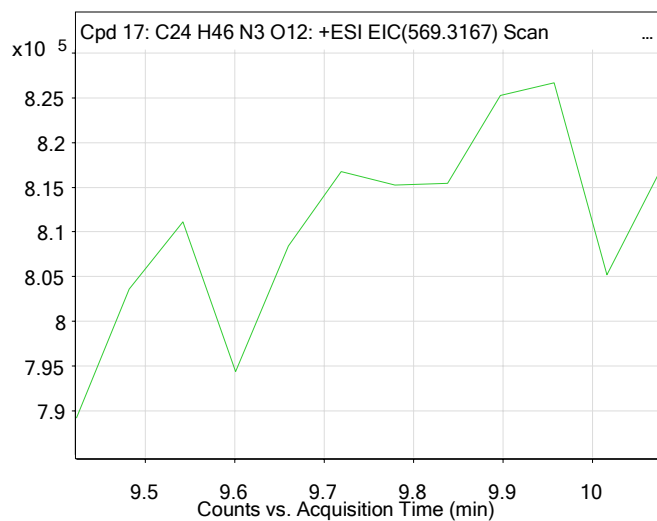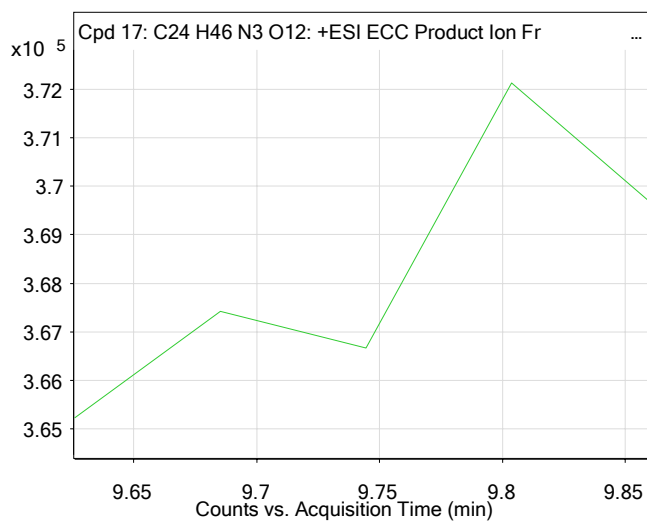

MS Spectrum

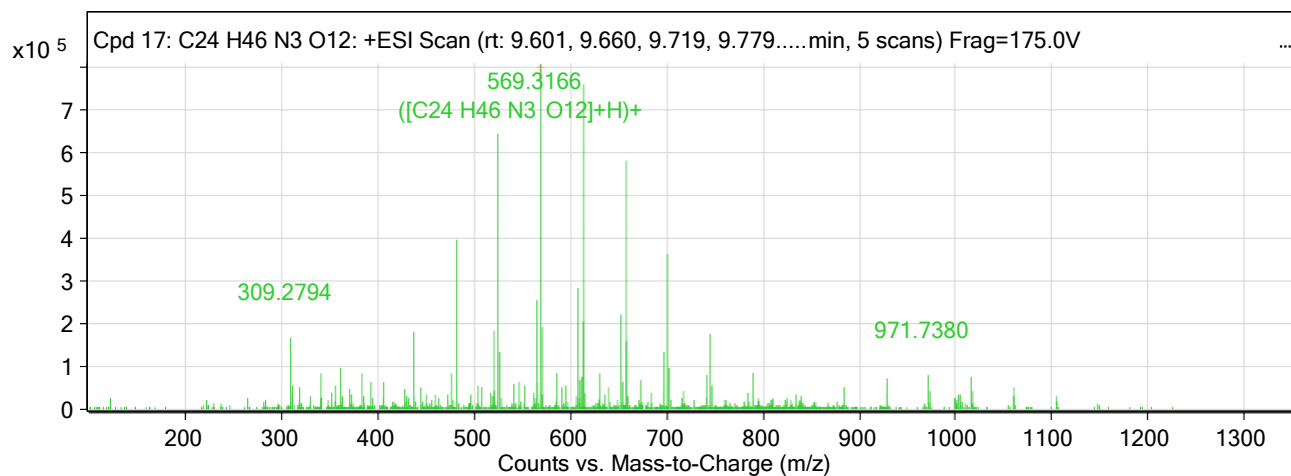

MS Zoomed Spectrum

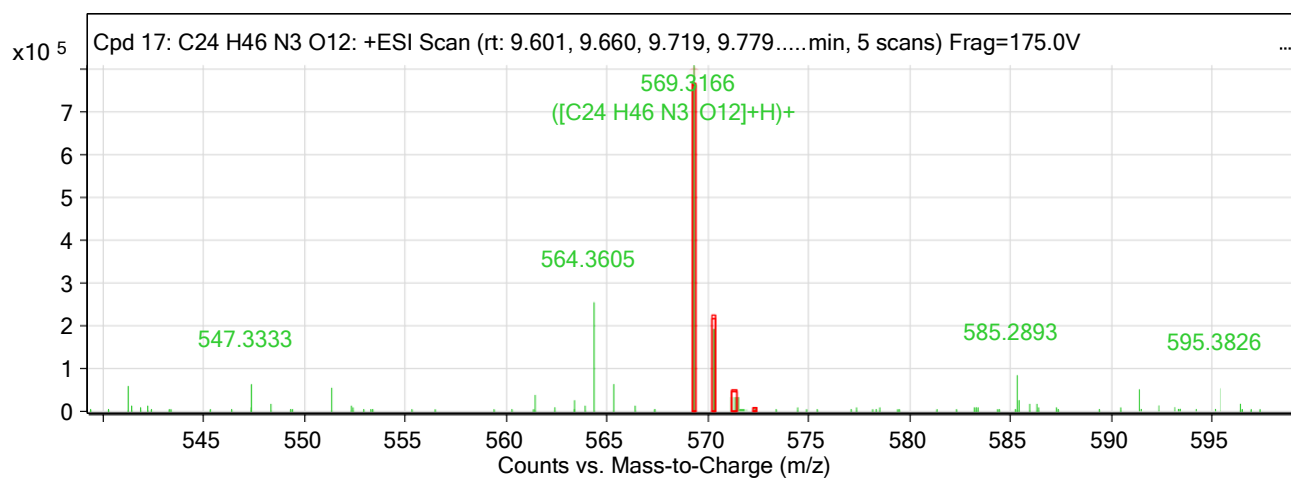

MS Spectrum Peak List

| m/z      | Calc m/z | Diff(ppm) | z | Abund     | Formula                                                        | Ion                |
|----------|----------|-----------|---|-----------|----------------------------------------------------------------|--------------------|
| 481.2633 |          |           | 1 | 396485.78 |                                                                |                    |
| 525.2904 |          |           | 1 | 642817.88 |                                                                |                    |
| 569.3166 | 569.3154 | -2.09     | 1 | 810073.88 | C <sub>24</sub> H <sub>46</sub> N <sub>3</sub> O <sub>12</sub> | (M+H) <sup>+</sup> |
| 570.3192 | 570.3186 | -0.98     | 1 | 193765.47 | C <sub>24</sub> H <sub>46</sub> N <sub>3</sub> O <sub>12</sub> | (M+H) <sup>+</sup> |
| 571.3211 | 571.3209 | -0.24     | 1 | 33132.73  | C <sub>24</sub> H <sub>46</sub> N <sub>3</sub> O <sub>12</sub> | (M+H) <sup>+</sup> |
| 572.3239 | 572.3235 | -0.71     | 1 | 4814.83   | C <sub>24</sub> H <sub>46</sub> N <sub>3</sub> O <sub>12</sub> | (M+H) <sup>+</sup> |
| 608.387  |          |           | 1 | 283568.19 |                                                                |                    |
| 613.3431 |          |           | 1 | 759747.94 |                                                                |                    |
| 657.3691 |          |           | 1 | 582333.63 |                                                                |                    |
| 701.3952 |          |           | 1 | 362210.59 |                                                                |                    |

MSMS Spectrum

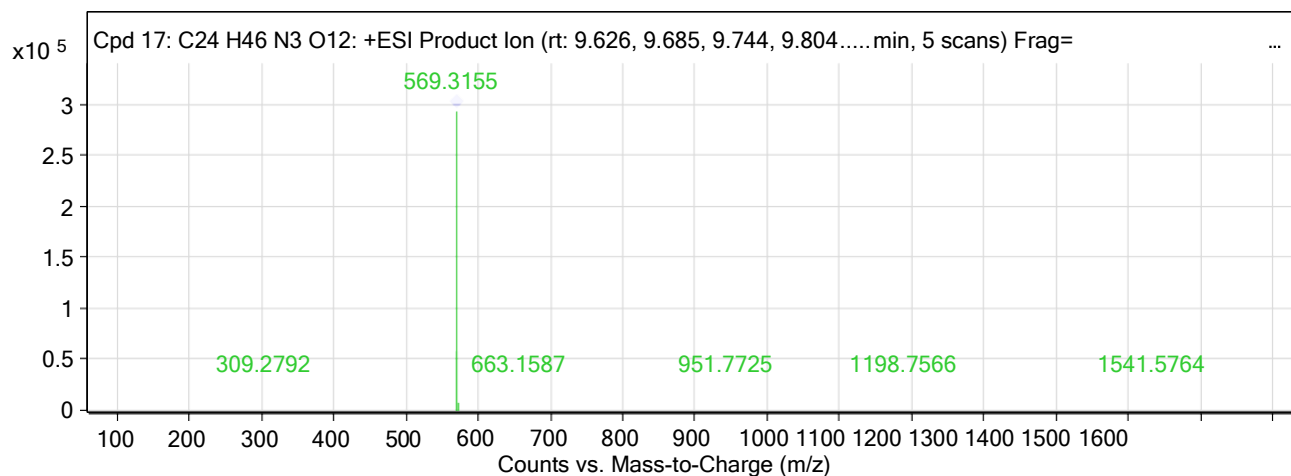



**MS/MS Spectrum Peak List**

| m/z      | Calc m/z | Diff(ppm) | z | Abund     |
|----------|----------|-----------|---|-----------|
| 115.0738 | 115.074  | 1.6       |   | 14.66     |
| 117.0912 | 117.091  | -1.38     |   | 23.53     |
| 123.0414 | 123.0427 | 10.59     |   | 14.03     |
| 133.0865 | 133.0859 | -4.13     |   | 14.75     |
| 143.1048 | 143.1053 | 3.73      |   | 22.19     |
| 272.0911 | 272.0891 | -7.36     |   | 14.8      |
| 283.2635 | 283.2632 | -1.1      |   | 24        |
| 309.2792 | 309.2788 | -1.16     | 1 | 28.46     |
| 567.3    | 567.2998 | -0.47     |   | 14.67     |
| 569.3155 | 569.3154 | -0.18     | 1 | 293070.59 |

| Compound Label      | m/z      | RT    | Algorithm  | Mass     |
|---------------------|----------|-------|------------|----------|
| Cpd 18: C28 H52 O14 | 613.3431 | 9.761 | Auto MS/MS | 612.3356 |

**Compound Chromatograms**

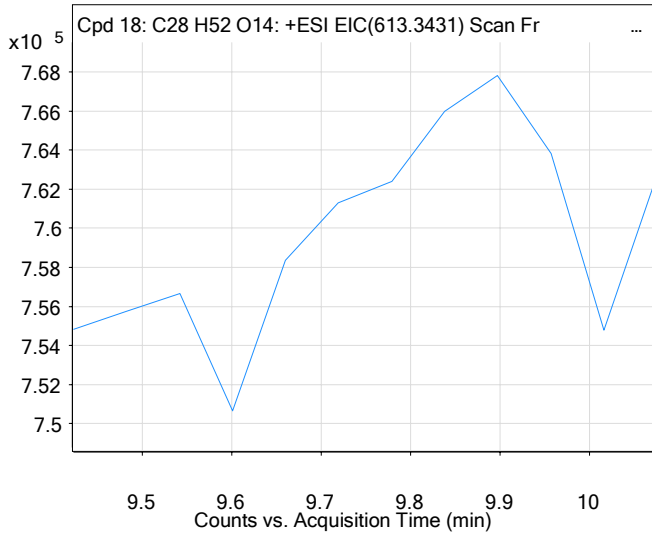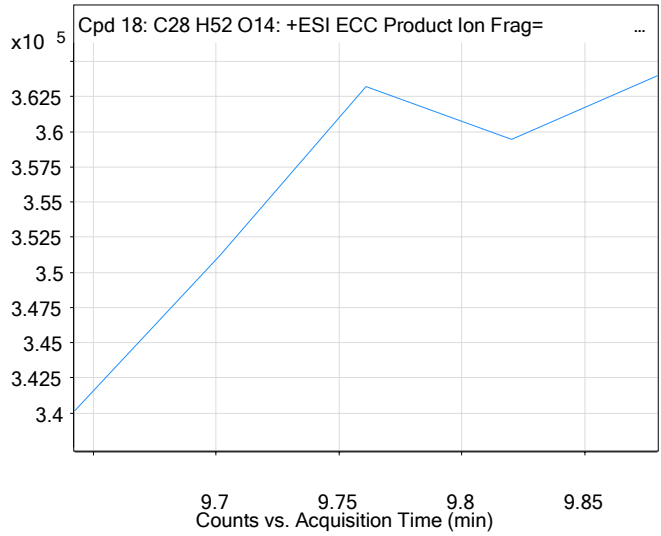

MS Spectrum

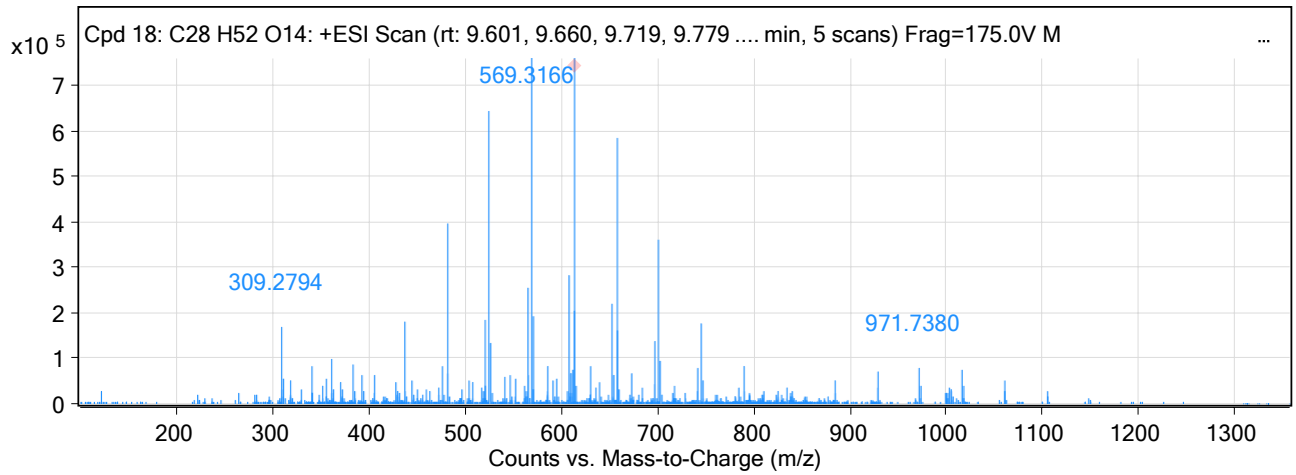

MS Zoomed Spectrum

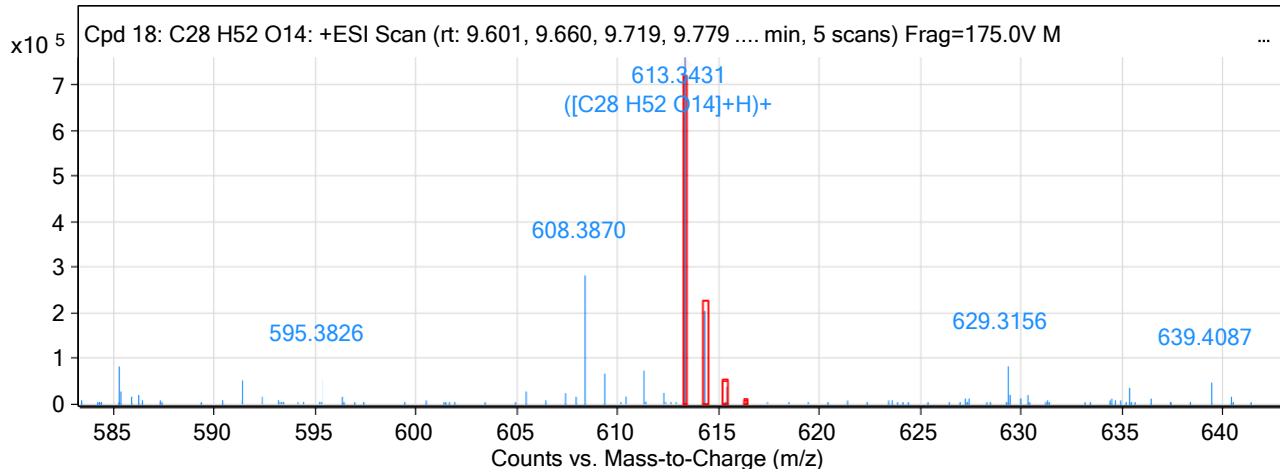

**MS Spectrum Peak List**

| m/z      | Calc m/z | Diff(ppm) | z | Abund     | Formula     | Ion    |
|----------|----------|-----------|---|-----------|-------------|--------|
| 481.2633 |          |           | 1 | 396485.78 |             |        |
| 525.2904 |          |           | 1 | 642817.88 |             |        |
| 569.3166 |          |           | 1 | 810073.88 |             |        |
| 613.3431 | 613.343  | -0.18     | 1 | 759747.94 | C28 H52 O14 | (M+H)+ |
| 614.3456 | 614.3464 | 1.27      | 1 | 205618.77 | C28 H52 O14 | (M+H)+ |
| 615.3475 | 615.3489 | 2.13      | 1 | 37857.05  | C28 H52 O14 | (M+H)+ |
| 616.3528 | 616.3515 | -2.07     | 1 | 5446.78   | C28 H52 O14 | (M+H)+ |
| 617.3642 | 617.354  | -16.56    | 1 | 780.39    | C28 H52 O14 | (M+H)+ |
| 657.3691 |          |           | 1 | 582333.63 |             |        |
| 701.3952 |          |           | 1 | 362210.59 |             |        |

MSMS Spectrum

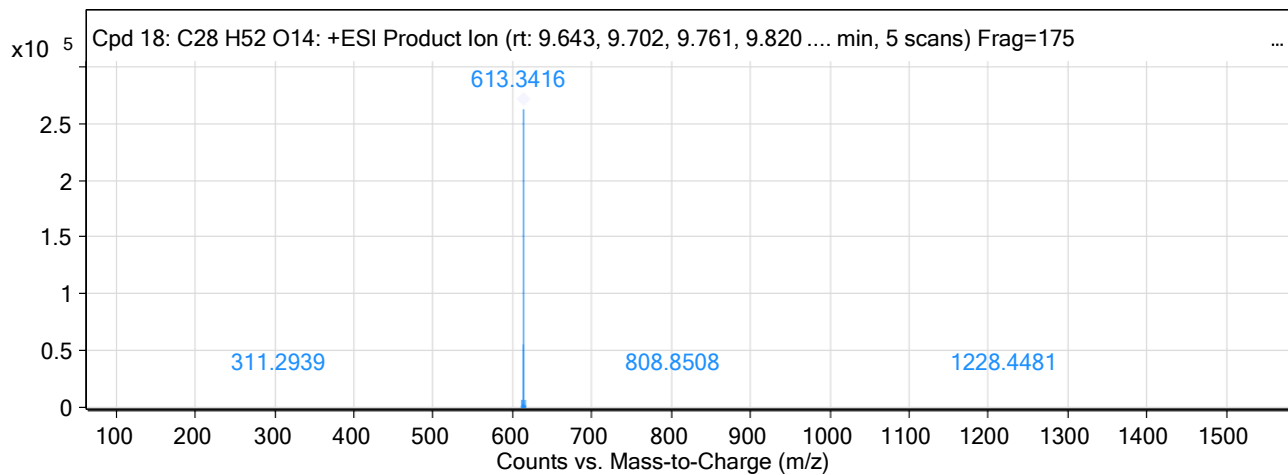

**MS/MS Spectrum Peak List**

| m/z      | Calc m/z | Diff(ppm) | z | Abund     |
|----------|----------|-----------|---|-----------|
| 133.0851 | 133.0859 | 5.97      | 1 | 42.37     |
| 309.2784 | 309.2788 | 1.47      | 1 | 119.3     |
| 312.2988 | 312.3023 | 11.21     | 1 | 36.8      |
| 357.0636 | 357.0664 | 7.87      | 1 | 28.56     |
| 612.2892 |          |           | 1 | 6226.84   |
| 612.6381 |          |           |   | 2730.84   |
| 613.2927 |          |           | 1 | 2242.29   |
| 613.3416 | 613.343  | 2.2       | 1 | 262526.81 |
| 614.3443 |          |           | 1 | 55375.81  |
| 615.3467 |          |           | 1 | 6784.2    |

| Compound Label         | m/z      | RT     | Algorithm  | Mass     |
|------------------------|----------|--------|------------|----------|
| Cpd 19: C24 H46 N3 O12 | 569.3163 | 10.041 | Auto MS/MS | 568.3089 |

**Compound Chromatograms**

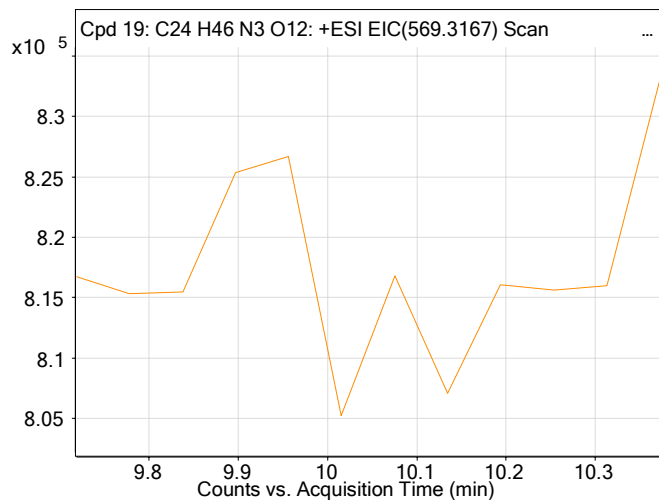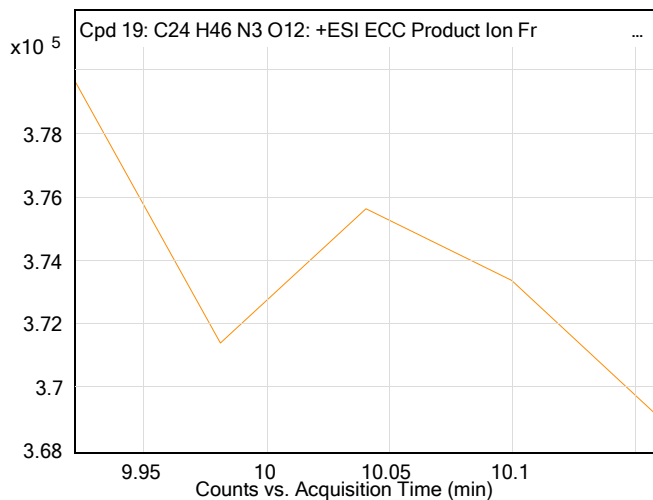

MS Spectrum

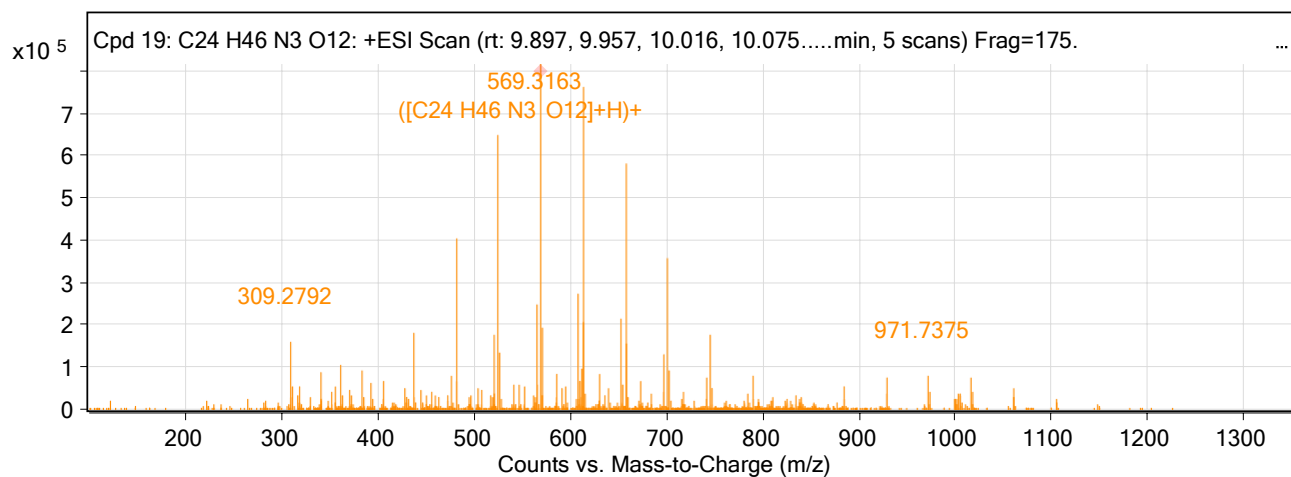

MS Zoomed Spectrum

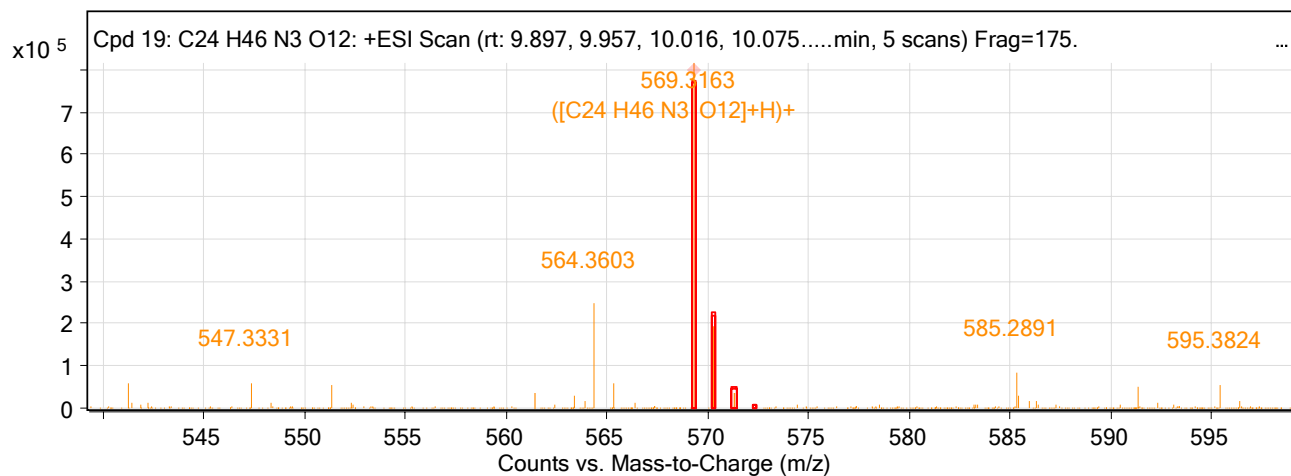

MS Spectrum Peak List

| m/z      | Calc m/z | Diff(ppm) | z | Abund     | Formula                                                        | Ion    |
|----------|----------|-----------|---|-----------|----------------------------------------------------------------|--------|
| 481.2631 |          |           | 1 | 402705.66 |                                                                |        |
| 525.2902 |          |           | 1 | 648700.75 |                                                                |        |
| 569.3163 | 569.3154 | -1.59     | 1 | 816214.63 | C <sub>24</sub> H <sub>46</sub> N <sub>3</sub> O <sub>12</sub> | (M+H)+ |
| 570.3189 | 570.3186 | -0.46     | 1 | 193713.91 | C <sub>24</sub> H <sub>46</sub> N <sub>3</sub> O <sub>12</sub> | (M+H)+ |
| 571.3208 | 571.3209 | 0.25      | 1 | 33026.93  | C <sub>24</sub> H <sub>46</sub> N <sub>3</sub> O <sub>12</sub> | (M+H)+ |
| 572.3234 | 572.3235 | 0.27      | 1 | 4759.2    | C <sub>24</sub> H <sub>46</sub> N <sub>3</sub> O <sub>12</sub> | (M+H)+ |
| 608.3867 |          |           | 1 | 274346.66 |                                                                |        |
| 613.3428 |          |           | 1 | 761718.25 |                                                                |        |
| 657.3688 |          |           | 1 | 580994.31 |                                                                |        |

MSMS Spectrum

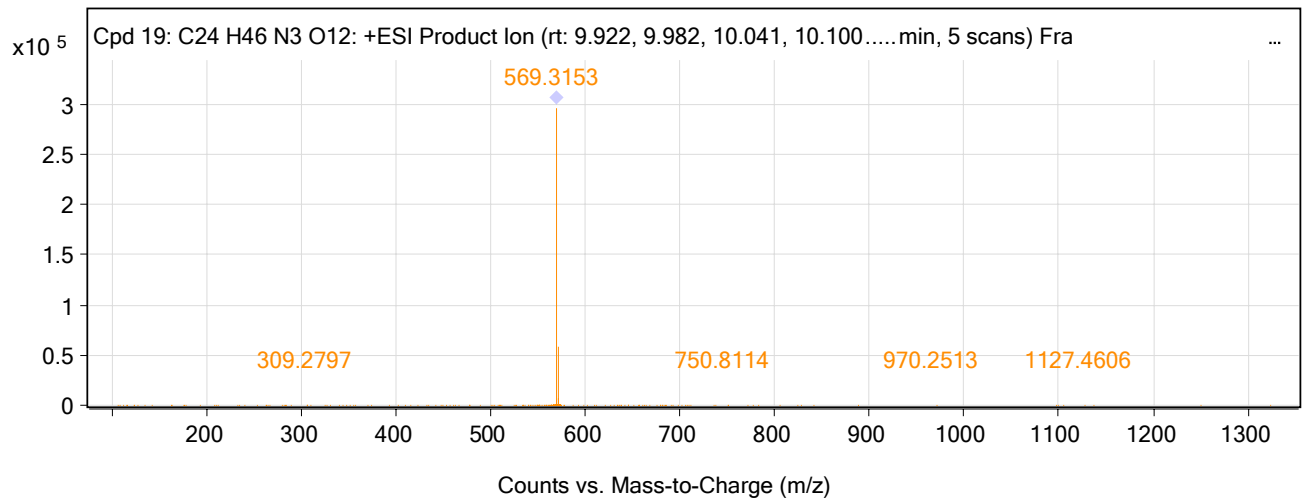

MS/MS Spectrum PeakList

| m/z      | Calc m/z | Diff(ppm) | z | Abund     |
|----------|----------|-----------|---|-----------|
| 123.0415 | 123.0427 | 9.76      |   | 21.01     |
| 133.0877 | 133.0886 | 6.86      |   | 25.87     |
| 208.1413 | 208.1418 | 2.39      |   | 16.84     |
| 262.1479 | 262.1523 | 16.93     |   | 18.37     |
| 282.2773 | 282.2791 | 6.43      |   | 16.8      |
| 283.2634 | 283.2632 | -0.8      |   | 17.61     |
| 309.2797 | 309.2788 | -3.03     |   | 35.93     |
| 538.2955 | 538.297  | 2.91      |   | 14.38     |
| 566.2915 | 566.292  | 0.78      |   | 21.27     |
| 569.3153 | 569.3154 | 0.19      | 1 | 296431.66 |

| Compound Label         | m/z      | RT     | Algorithm  | Mass     |
|------------------------|----------|--------|------------|----------|
| Cpd 20: C26 H50 N3 O13 | 613.3428 | 10.057 | Auto MS/MS | 612.3353 |

Compound Chromatograms

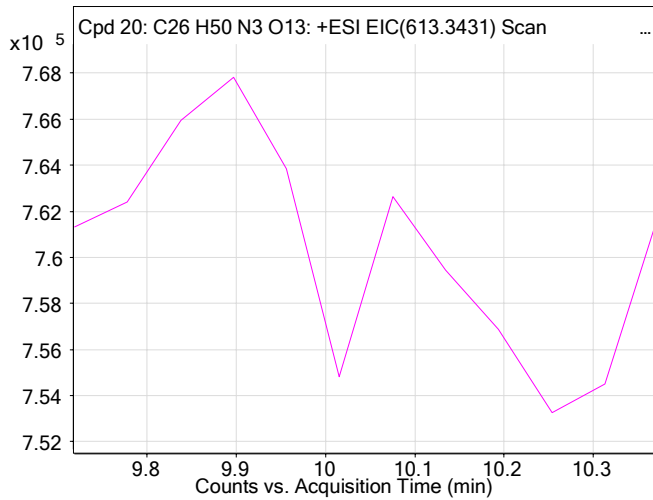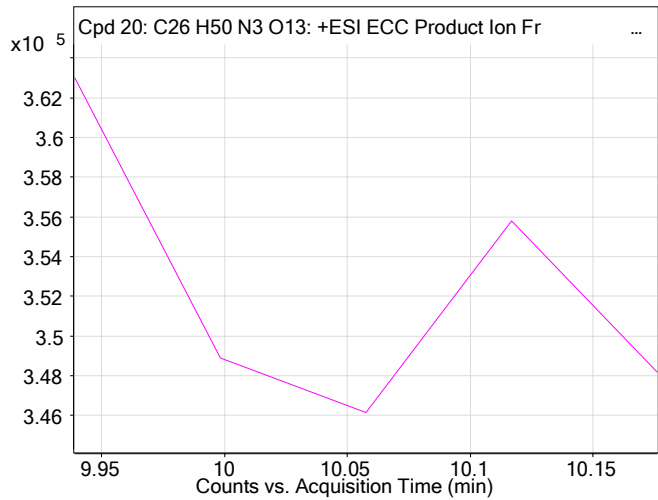

MS Spectrum

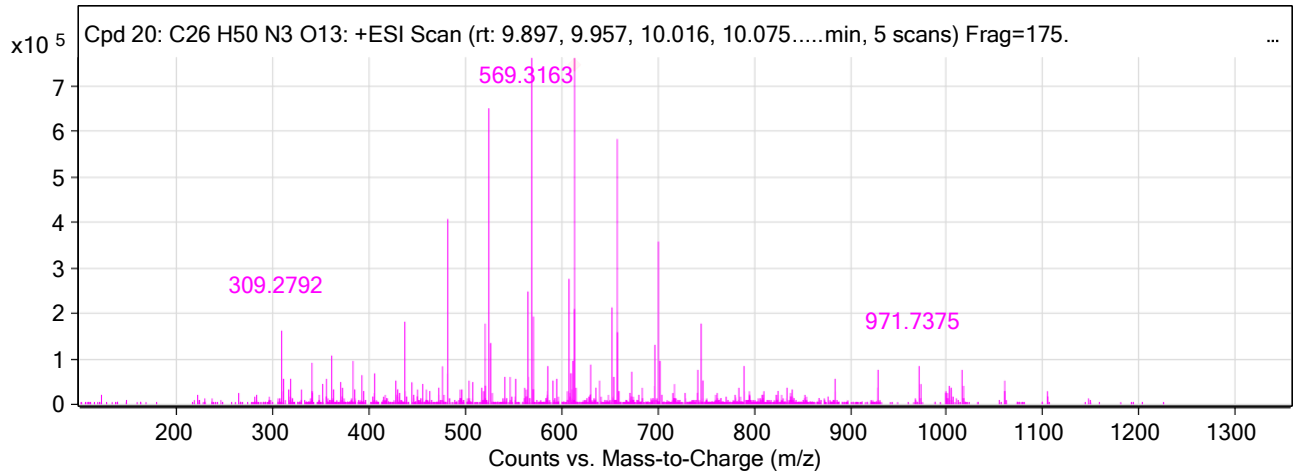

MS Zoomed Spectrum

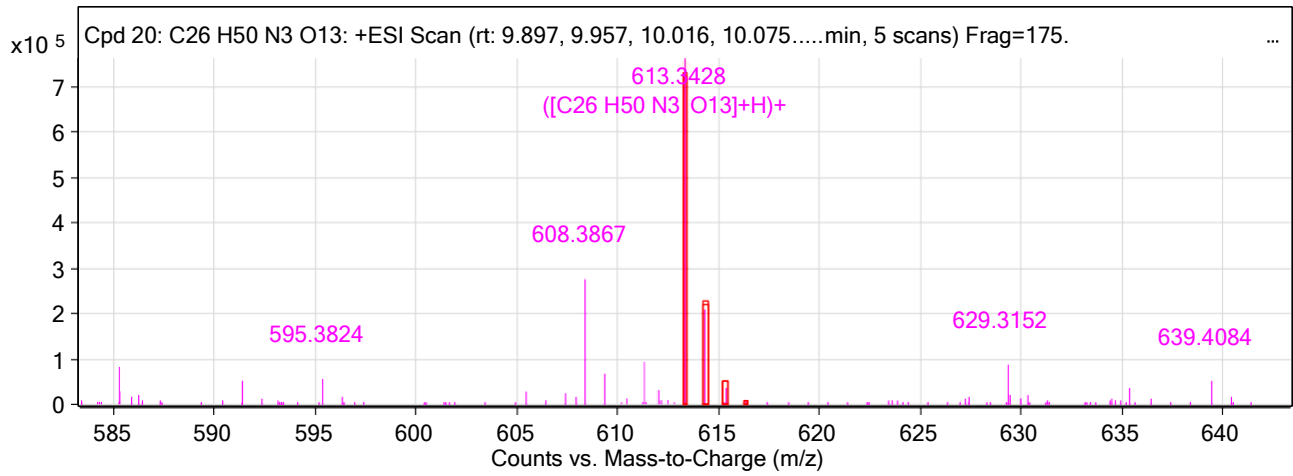

MS Spectrum Peak List

| m/z      | Calc m/z | Diff(ppm) | z | Abund     | Formula                                                        | Ion                |
|----------|----------|-----------|---|-----------|----------------------------------------------------------------|--------------------|
| 481.2631 |          |           | 1 | 402705.66 |                                                                |                    |
| 525.2902 |          |           | 1 | 648700.75 |                                                                |                    |
| 569.3163 |          |           | 1 | 816214.63 |                                                                |                    |
| 608.3867 |          |           | 1 | 274346.66 |                                                                |                    |
| 613.3428 | 613.3416 | -1.85     | 1 | 761718.25 | C <sub>26</sub> H <sub>50</sub> N <sub>3</sub> O <sub>13</sub> | (M+H) <sup>+</sup> |
| 614.3453 | 614.3448 | -0.76     | 1 | 206921.02 | C <sub>26</sub> H <sub>50</sub> N <sub>3</sub> O <sub>13</sub> | (M+H) <sup>+</sup> |
| 615.3473 | 615.3472 | -0.1      | 1 | 36959.32  | C <sub>26</sub> H <sub>50</sub> N <sub>3</sub> O <sub>13</sub> | (M+H) <sup>+</sup> |
| 616.3534 | 616.3498 | -5.89     | 1 | 5509.92   | C <sub>26</sub> H <sub>50</sub> N <sub>3</sub> O <sub>13</sub> | (M+H) <sup>+</sup> |
| 657.3688 |          |           | 1 | 580994.31 |                                                                |                    |
| 701.3948 |          |           | 1 | 359290.19 |                                                                |                    |

MSMS Spectrum

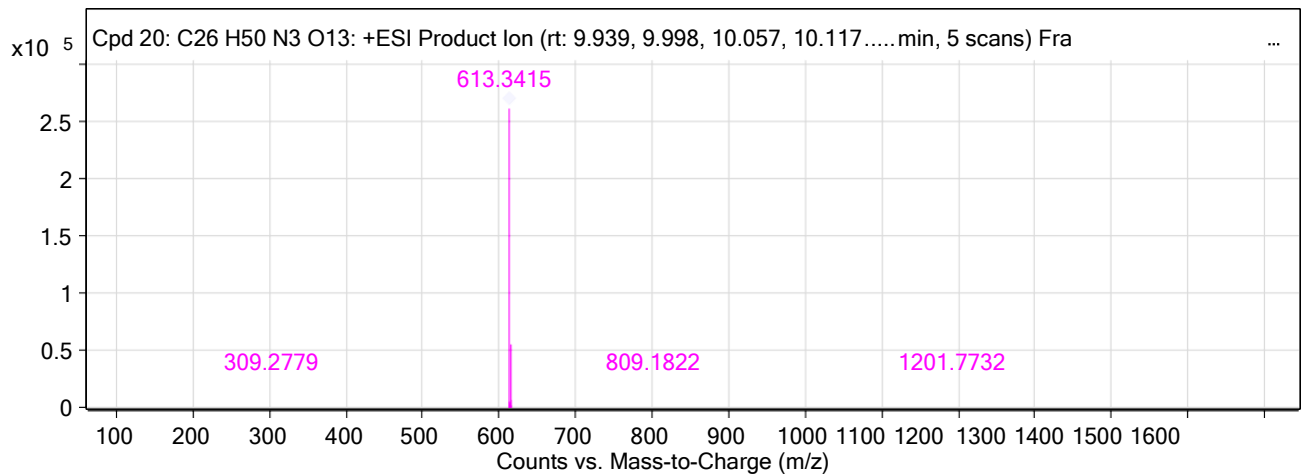

**MS/MS Spectrum Peak List**

| m/z      | Calc m/z | Diff(ppm) | z | Abund     |
|----------|----------|-----------|---|-----------|
| 309.2779 | 309.2775 | -1.39     | 1 | 102.04    |
| 612.2895 |          |           | 1 | 4513.53   |
| 612.387  |          |           | 2 | 2239.98   |
| 612.6378 |          |           |   | 2922.68   |
| 612.8887 |          |           | 2 | 2329.08   |
| 613.1398 |          |           | 1 | 1212.11   |
| 613.2917 |          |           | 1 | 1911.88   |
| 613.3415 | 613.3416 | 0.16      | 1 | 261858.58 |
| 614.3443 |          |           | 1 | 54949.06  |
| 615.3463 |          |           | 1 | 6893.73   |

| Compound Label         | m/z      | RT     | Algorithm  | Mass    |
|------------------------|----------|--------|------------|---------|
| Cpd 21: C24 H46 N3 O12 | 569.3165 | 10.337 | Auto MS/MS | 568.309 |

**Compound Chromatograms**

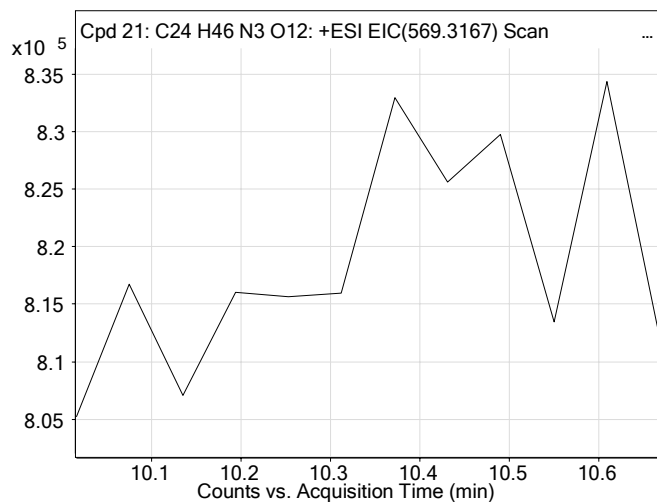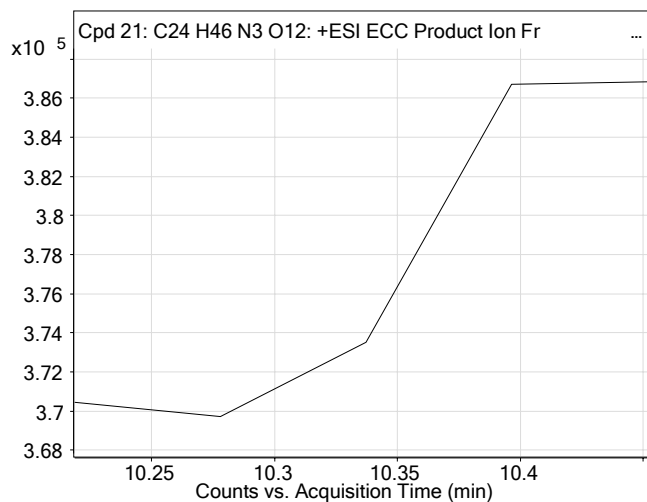

MS Spectrum

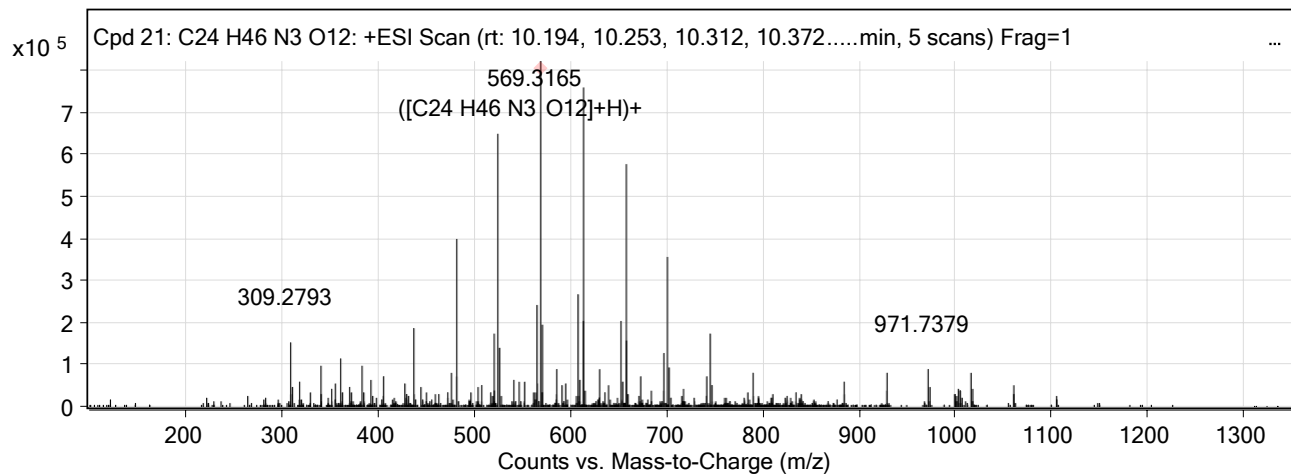

MS Zoomed Spectrum

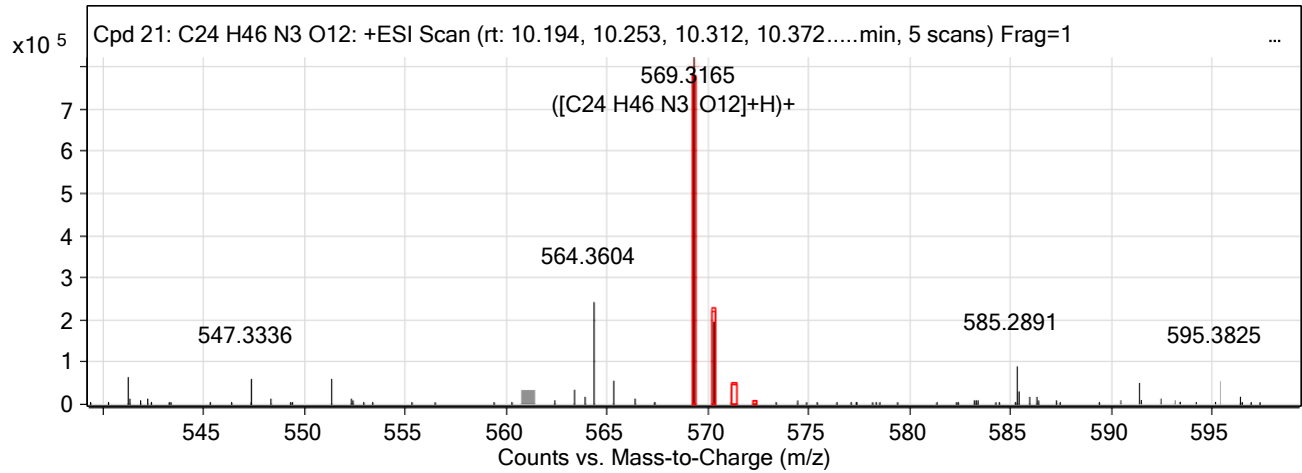

**MS Spectrum Peak List**

| m/z      | Calc m/z | Diff(ppm) | z | Abund     | Formula                                                        | Ion    |
|----------|----------|-----------|---|-----------|----------------------------------------------------------------|--------|
| 481.2632 |          |           | 1 | 399271.56 |                                                                |        |
| 525.2903 |          |           | 1 | 648719.69 |                                                                |        |
| 569.3165 | 569.3154 | -1.86     | 1 | 821254.88 | C <sub>24</sub> H <sub>46</sub> N <sub>3</sub> O <sub>12</sub> | (M+H)+ |
| 570.319  | 570.3186 | -0.73     | 1 | 195571.09 | C <sub>24</sub> H <sub>46</sub> N <sub>3</sub> O <sub>12</sub> | (M+H)+ |
| 571.3208 | 571.3209 | 0.18      | 1 | 32940.66  | C <sub>24</sub> H <sub>46</sub> N <sub>3</sub> O <sub>12</sub> | (M+H)+ |
| 572.3238 | 572.3235 | -0.49     | 1 | 4841.96   | C <sub>24</sub> H <sub>46</sub> N <sub>3</sub> O <sub>12</sub> | (M+H)+ |
| 608.3868 |          |           | 1 | 266187.63 |                                                                |        |
| 613.343  |          |           | 1 | 758859.88 |                                                                |        |
| 657.3689 |          |           | 1 | 575207.69 |                                                                |        |
| 701.395  |          |           | 1 | 355478.13 |                                                                |        |

MSMS Spectrum

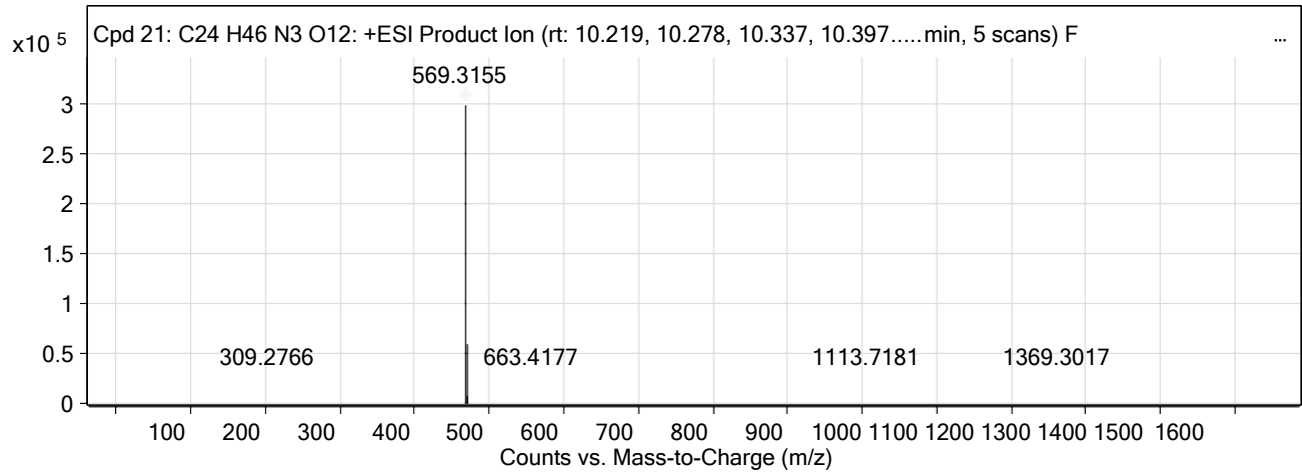

**MS/MS Spectrum Peak List**

| m/z      | Calc m/z | Diff(ppm) | z | Abund     |
|----------|----------|-----------|---|-----------|
| 117.0912 | 117.091  | -1.92     |   | 29.71     |
| 133.0867 | 133.0859 | -6        |   | 38.45     |
| 283.2645 | 283.2632 | -4.82     |   | 51.88     |
| 309.2766 | 309.2775 | 2.78      | 1 | 86.28     |
| 327.1575 | 327.1524 | -15.77    |   | 17.02     |
| 422.3108 | 211.1553 | -500000.1 | 2 | 22.18     |
| 451.2819 | 451.2776 | -9.56     |   | 16.92     |
| 536.2772 | 536.2814 | 7.86      |   | 17.52     |
| 566.2967 | 566.292  | -8.43     |   | 29.78     |
| 569.3155 | 569.3154 | -0.09     | 1 | 299229.75 |

| Compound Label                                          | m/z     | RT     | Algorithm  | Mass     |
|---------------------------------------------------------|---------|--------|------------|----------|
| Cpd 22: C <sub>28</sub> H <sub>52</sub> O <sub>14</sub> | 613.343 | 10.354 | Auto MS/MS | 612.3355 |

Compound Chromatograms

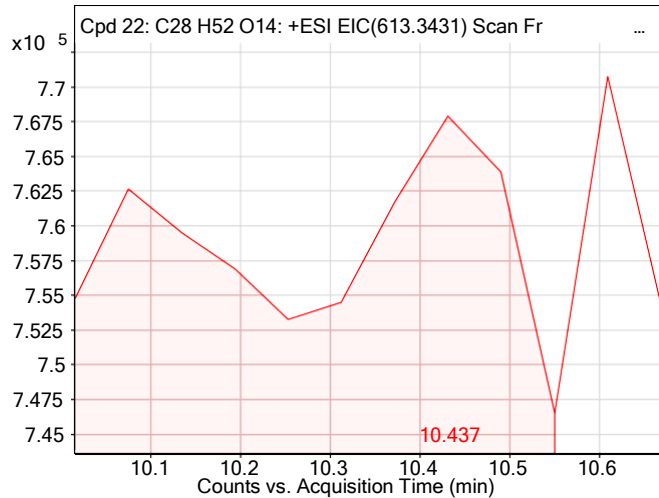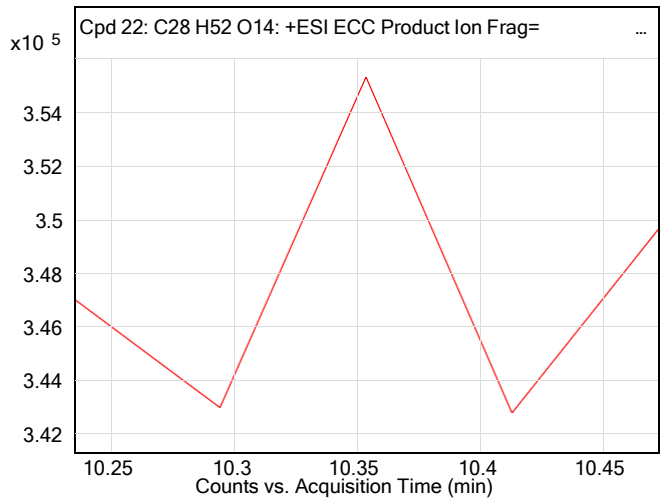

MS Spectrum

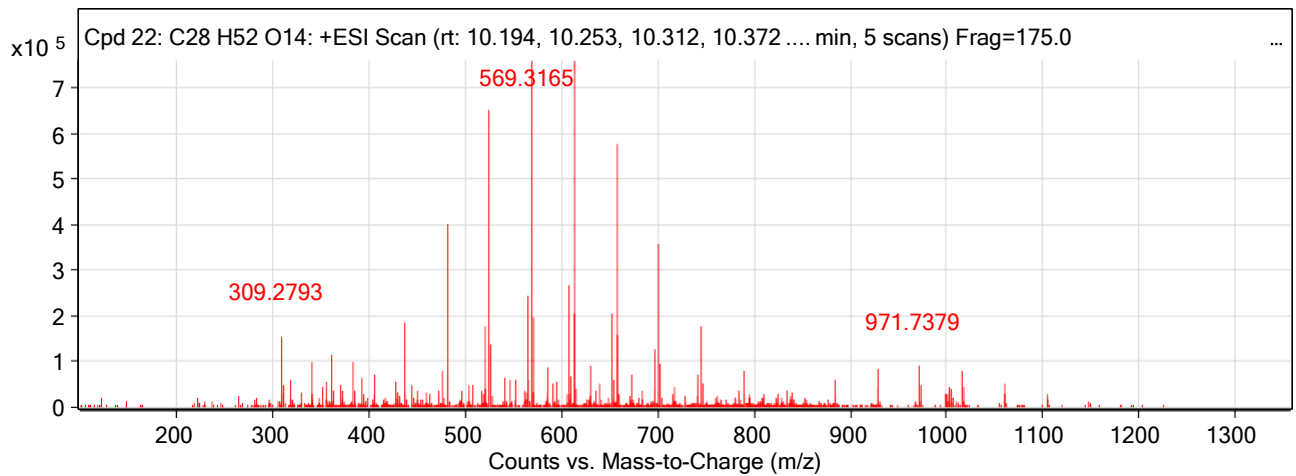

MS Zoomed Spectrum

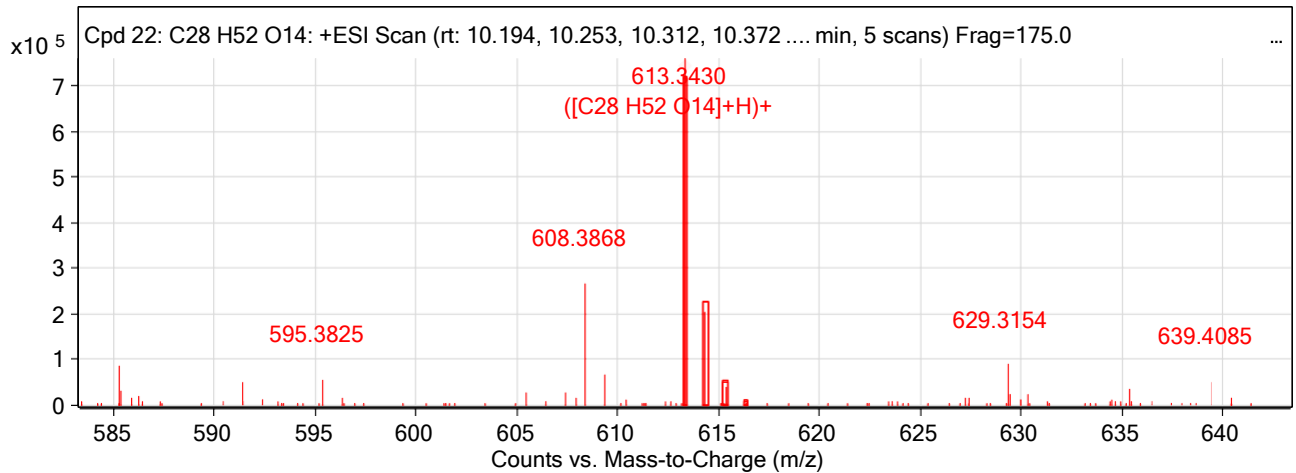

MS Spectrum Peak List

| m/z      | Calc m/z | Diff(ppm) | z | Abund     | Formula     | Ion    |
|----------|----------|-----------|---|-----------|-------------|--------|
| 481.2632 |          |           | 1 | 399271.56 |             |        |
| 525.2903 |          |           | 1 | 648719.69 |             |        |
| 569.3165 |          |           | 1 | 821254.88 |             |        |
| 608.3868 |          |           | 1 | 266187.63 |             |        |
| 613.343  | 613.343  | 0.02      | 1 | 758859.88 | C28 H52 O14 | (M+H)+ |
| 614.3455 | 614.3464 | 1.47      | 1 | 205072.28 | C28 H52 O14 | (M+H)+ |
| 615.3475 | 615.3489 | 2.14      | 1 | 37730.02  | C28 H52 O14 | (M+H)+ |
| 616.3537 | 616.3515 | -3.49     | 1 | 5407.07   | C28 H52 O14 | (M+H)+ |
| 657.3689 |          |           | 1 | 575207.69 |             |        |



MSMS Spectrum

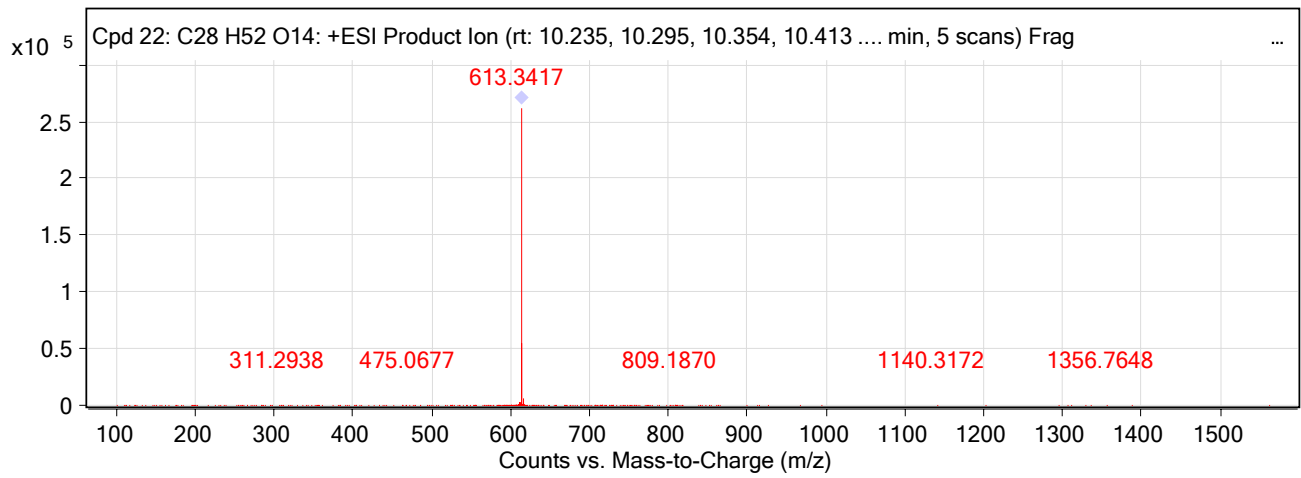

MS/MS Spectrum Peak List

| m/z      | Calc m/z | Diff(ppm)  | z | Abund     |
|----------|----------|------------|---|-----------|
| 133.0853 | 133.0859 | 4.69       |   | 24.51     |
| 177.1121 | 177.1121 | 0.31       |   | 26.3      |
| 254.1412 | 254.136  | -20.29     |   | 26.97     |
| 309.2786 | 309.2788 | 0.58       | 1 | 102.41    |
| 609.3199 | 304.6556 | -500007.19 | 2 | 57.3      |
| 612.3875 |          |            | 2 | 2468.19   |
| 612.6375 |          |            |   | 2892.04   |
| 613.3417 | 613.343  | 2.17       | 1 | 262161.13 |
| 614.3444 |          |            | 1 | 55400.41  |
| 615.3468 |          |            | 1 | 6702.06   |

| Compound Label         | m/z      | RT     | Algorithm  | Mass     |
|------------------------|----------|--------|------------|----------|
| Cpd 23: C24 H46 N3 O12 | 569.3166 | 10.634 | Auto MS/MS | 568.3092 |

Compound Chromatograms

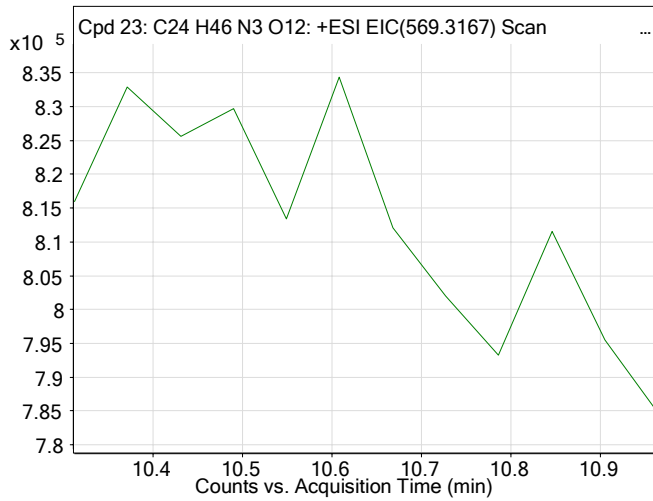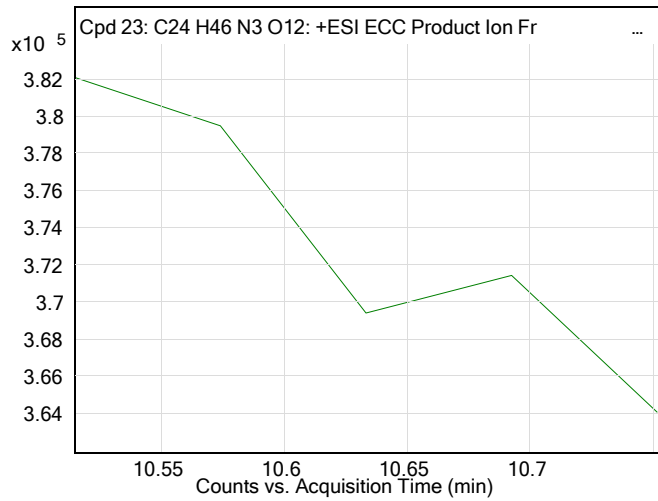

MS Spectrum

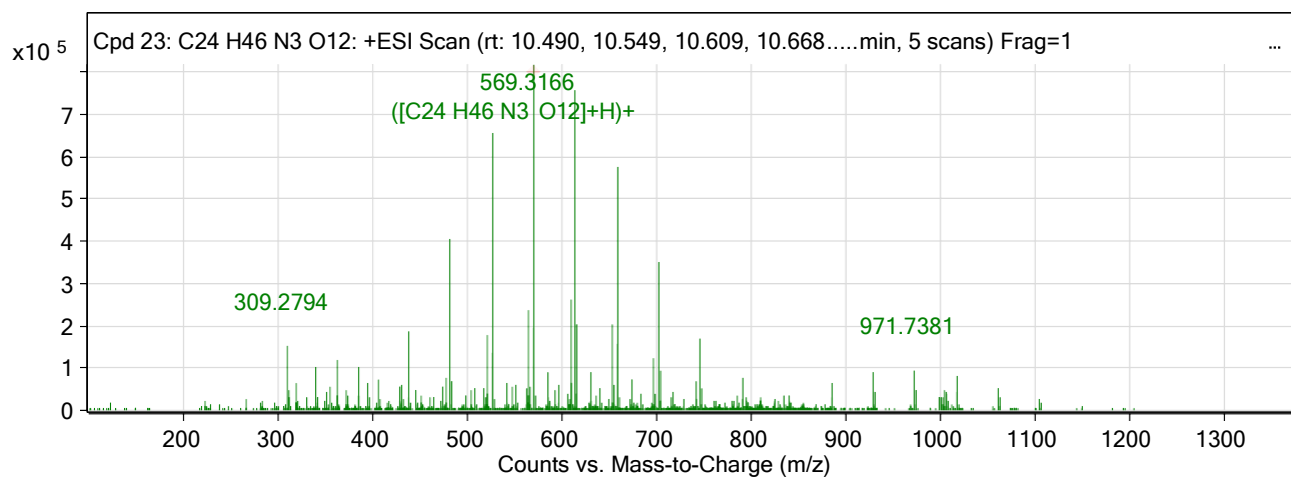

MS Zoomed Spectrum

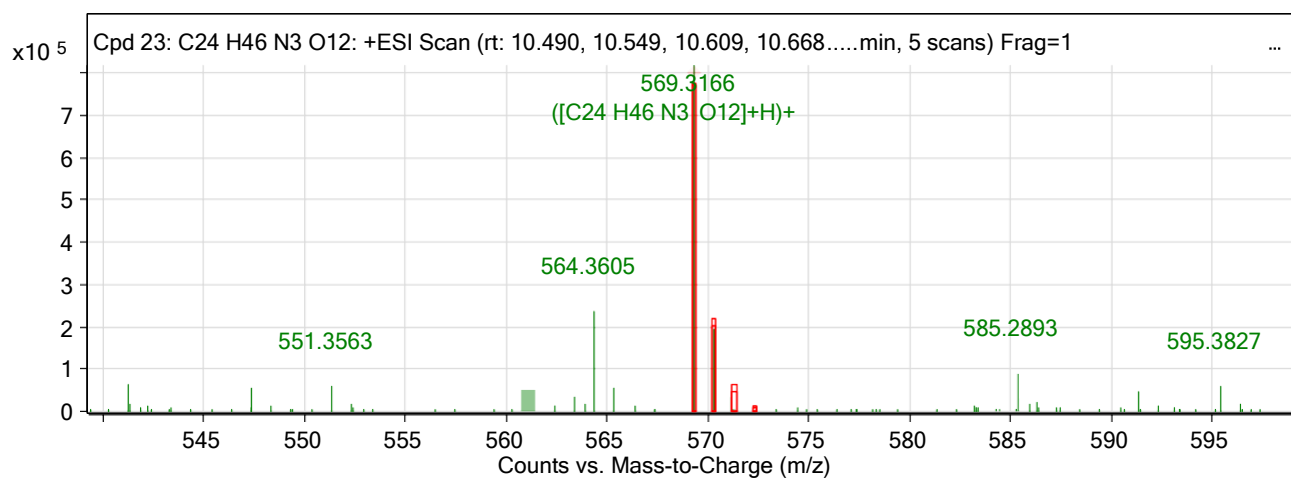

MS Spectrum Peak List

| m/z      | Calc m/z | Diff(ppm) | z | Abund     | Formula                                                        | Ion                |
|----------|----------|-----------|---|-----------|----------------------------------------------------------------|--------------------|
| 481.2633 |          |           | 1 | 405086.84 |                                                                |                    |
| 525.2904 |          |           | 1 | 653549.44 |                                                                |                    |
| 569.3166 | 569.3154 | -2.13     | 1 | 818333    | C <sub>24</sub> H <sub>46</sub> N <sub>3</sub> O <sub>12</sub> | (M+H) <sup>+</sup> |
| 570.3192 | 570.3186 | -0.97     | 1 | 192433.03 | C <sub>24</sub> H <sub>46</sub> N <sub>3</sub> O <sub>12</sub> | (M+H) <sup>+</sup> |
| 571.321  | 571.3209 | -0.15     | 1 | 32762.05  | C <sub>24</sub> H <sub>46</sub> N <sub>3</sub> O <sub>12</sub> | (M+H) <sup>+</sup> |
| 572.3238 | 572.3235 | -0.47     | 1 | 4935.98   | C <sub>24</sub> H <sub>46</sub> N <sub>3</sub> O <sub>12</sub> | (M+H) <sup>+</sup> |
| 608.387  |          |           | 1 | 261198.34 |                                                                |                    |
| 613.3431 |          |           | 1 | 755781.63 |                                                                |                    |
| 657.3691 |          |           | 1 | 573130.88 |                                                                |                    |
| 701.3952 |          |           | 1 | 350273.47 |                                                                |                    |

MSMS Spectrum

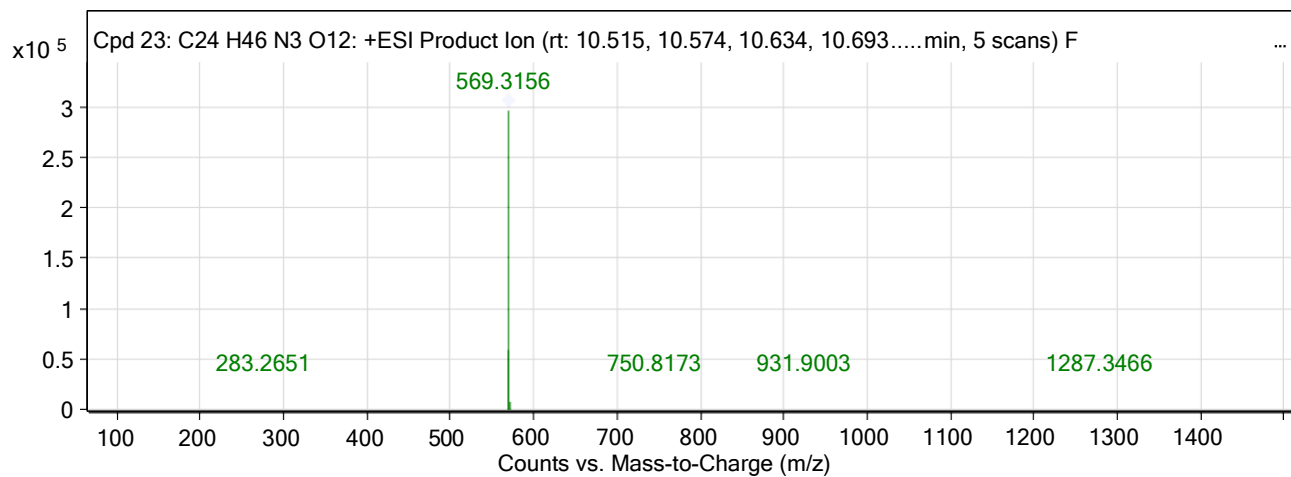

**MS/MS Spectrum Peak List**

| m/z      | Calc m/z | Diff(ppm) | z | Abund     |
|----------|----------|-----------|---|-----------|
| 133.0874 | 133.0886 | 8.91      |   | 14.4      |
| 177.1125 | 177.1121 | -2.32     |   | 15.32     |
| 244.1683 | 244.1669 | -5.52     |   | 13.98     |
| 283.2651 | 283.2632 | -6.73     |   | 33.49     |
| 309.2769 | 309.2775 | 1.74      |   | 20.59     |
| 377.2659 | 377.2646 | -3.36     |   | 13.81     |
| 381.188  | 381.1868 | -3.3      |   | 11.8      |
| 386.2337 | 386.2299 | -9.93     |   | 18.06     |
| 422.3096 | 211.1553 | -49998.73 | 2 | 17.33     |
| 569.3156 | 569.3154 | -0.26     | 1 | 296444.75 |

| Compound Label      | m/z      | RT    | Algorithm  | Mass     |
|---------------------|----------|-------|------------|----------|
| Cpd 24: C28 H52 O14 | 613.3431 | 10.65 | Auto MS/MS | 612.3356 |

**Compound Chromatograms**

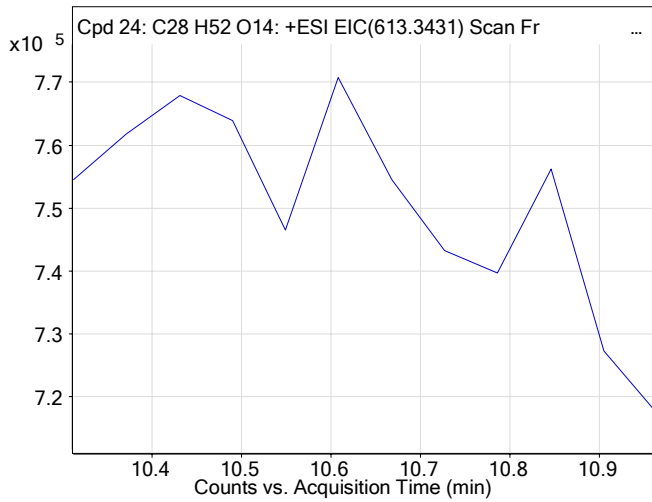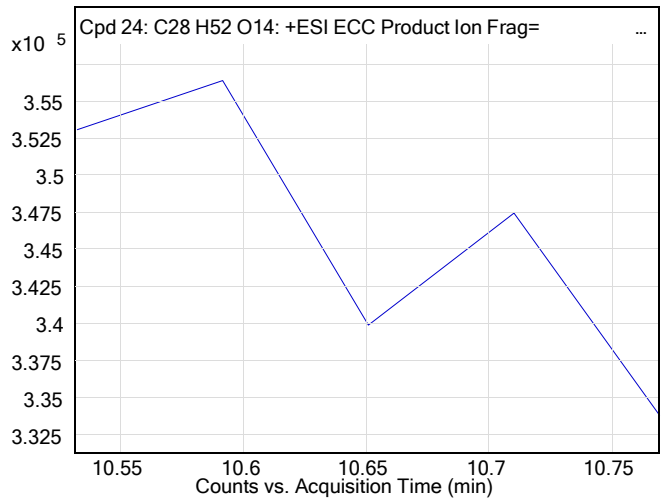

MS Spectrum

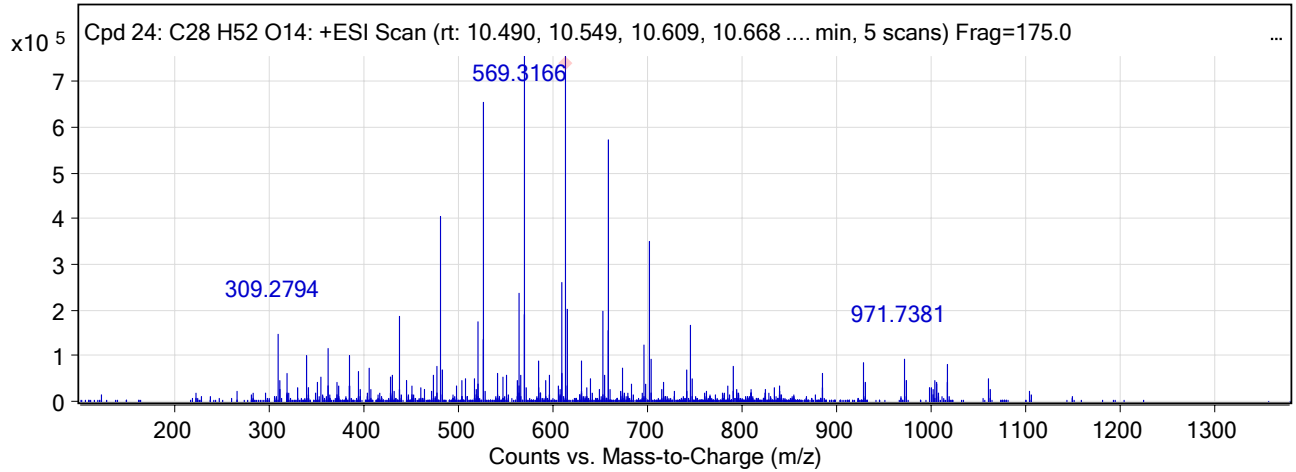

MS Zoomed Spectrum

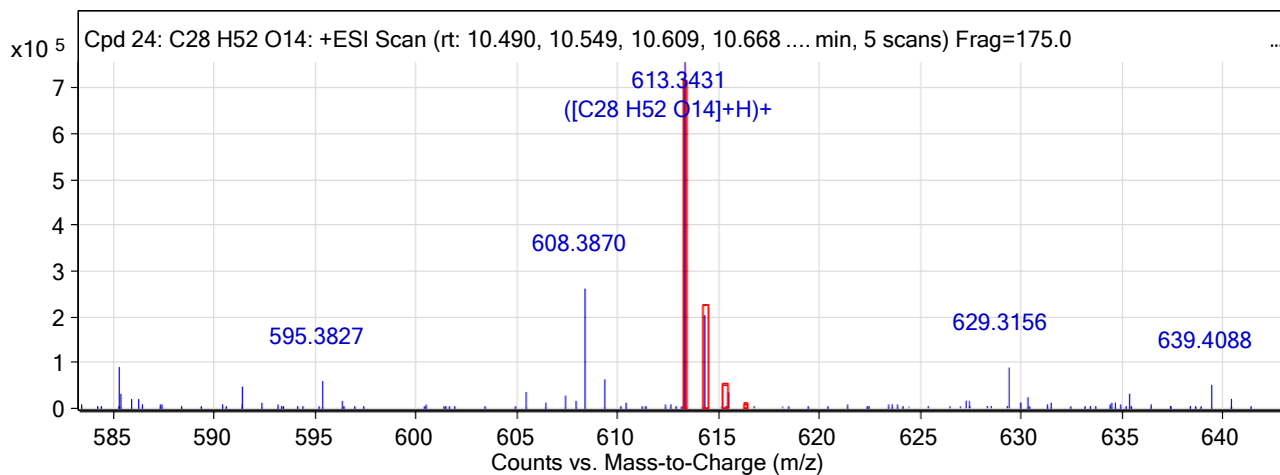

**MS Spectrum Peak List**

| m/z      | Calc m/z | Diff(ppm) | z | Abund     | Formula     | Ion    |
|----------|----------|-----------|---|-----------|-------------|--------|
| 481.2633 |          |           | 1 | 405086.84 |             |        |
| 525.2904 |          |           | 1 | 653549.44 |             |        |
| 569.3166 |          |           | 1 | 818333    |             |        |
| 608.387  |          |           | 1 | 261198.34 |             |        |
| 613.3431 | 613.343  | -0.22     | 1 | 755781.63 | C28 H52 O14 | (M+H)+ |
| 614.3456 | 614.3464 | 1.31      | 1 | 204375.63 | C28 H52 O14 | (M+H)+ |
| 615.3477 | 615.3489 | 1.95      | 1 | 36835.82  | C28 H52 O14 | (M+H)+ |
| 616.3542 | 616.3515 | -4.27     | 1 | 5391.58   | C28 H52 O14 | (M+H)+ |
| 657.3691 |          |           | 1 | 573130.88 |             |        |
| 701.3952 |          |           | 1 | 350273.47 |             |        |

MSMS Spectrum

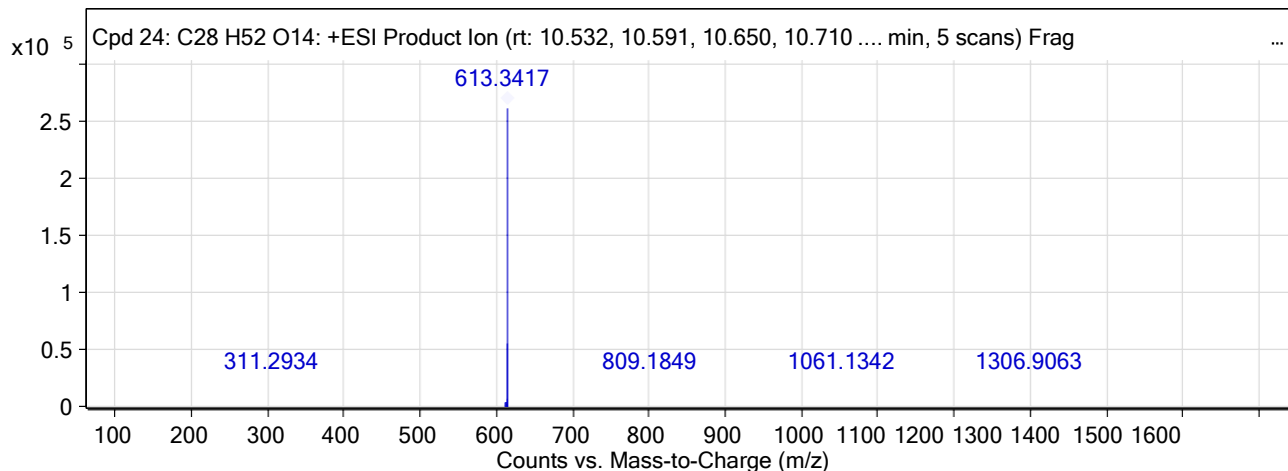

**MS/MS Spectrum Peak List**

| m/z      | Calc m/z | Diff(ppm)  | z | Abund     |
|----------|----------|------------|---|-----------|
| 309.2794 | 309.2788 | -1.98      | 1 | 94.31     |
| 609.3103 | 304.6556 | -499999.33 | 2 | 74.45     |
| 612.3873 |          |            | 2 | 2516.74   |
| 612.6383 |          |            |   | 3322.6    |
| 612.8889 |          |            | 2 | 2542.01   |
| 613.1399 |          |            | 1 | 1416.17   |
| 613.3417 | 613.343  | 2.02       | 1 | 260712.05 |
| 614.3445 |          |            | 1 | 53979.98  |
| 615.3467 |          |            | 1 | 6836.98   |
| 615.4121 |          |            | 2 | 858.29    |

| Compound Label      | m/z      | RT    | Algorithm  | Mass     |
|---------------------|----------|-------|------------|----------|
| Cpd 25: C26 H48 O13 | 569.3169 | 10.93 | Auto MS/MS | 568.3094 |

**Compound Chromatograms**

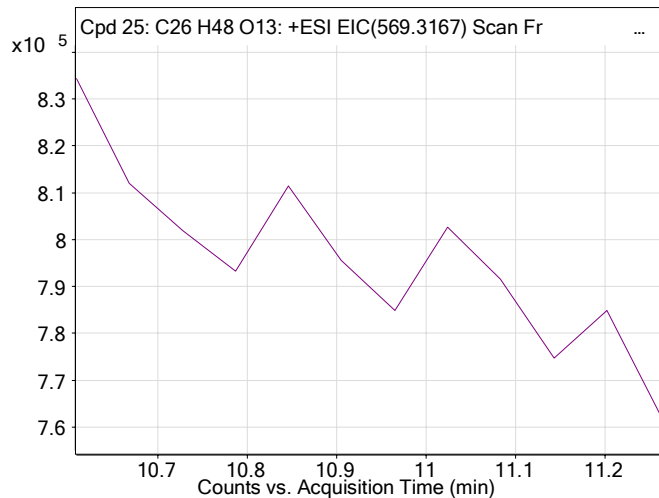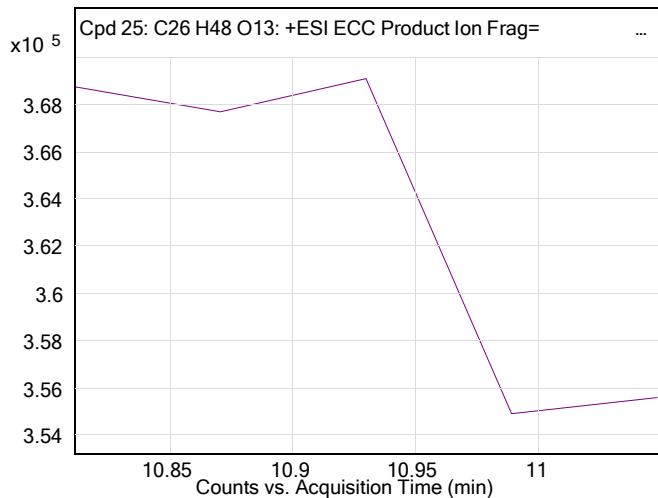

MS Spectrum

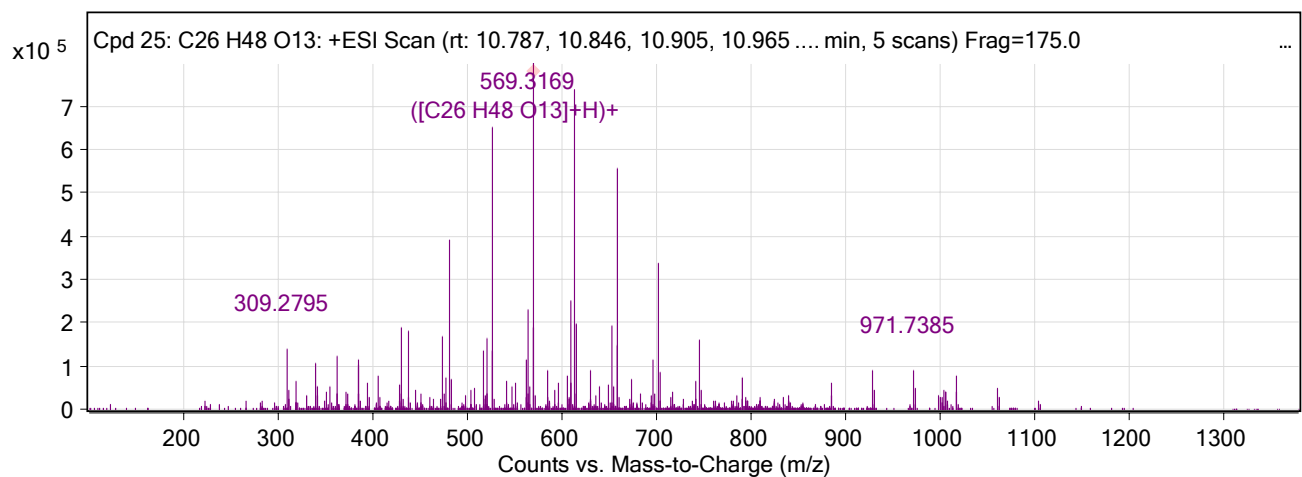

MS Zoomed Spectrum

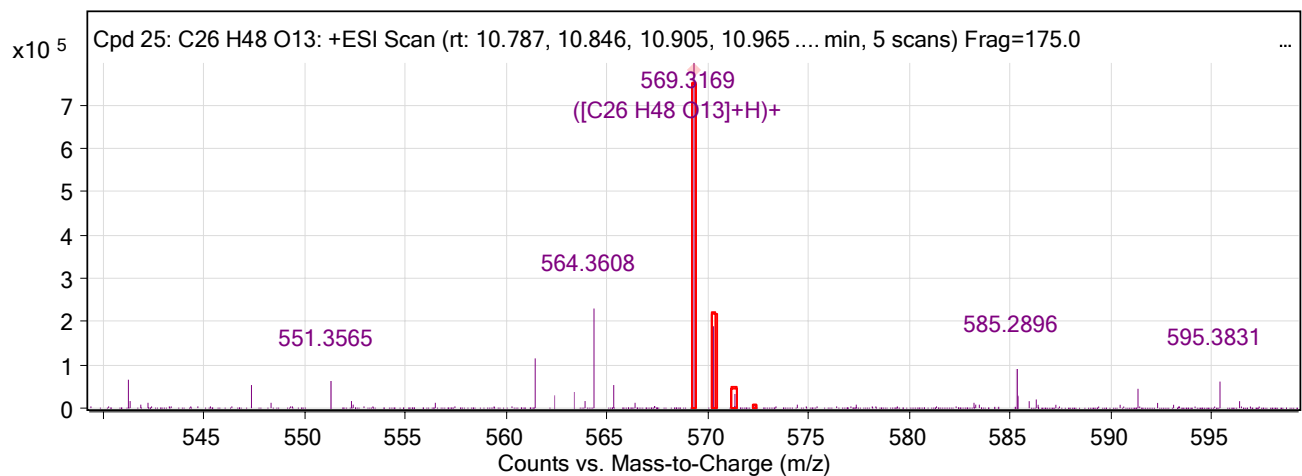

MS Spectrum Peak List

| m/z      | Calc m/z | Diff(ppm) | z | Abund     | Formula     | Ion    |
|----------|----------|-----------|---|-----------|-------------|--------|
| 481.2636 |          |           | 1 | 392387.63 |             |        |
| 525.2905 |          |           | 1 | 651139.31 |             |        |
| 569.3169 | 569.3168 | -0.31     | 1 | 797573.63 | C26 H48 O13 | (M+H)+ |
| 570.3195 | 570.3202 | 1.28      | 1 | 190473.33 | C26 H48 O13 | (M+H)+ |
| 571.3213 | 571.3226 | 2.22      | 1 | 31422.52  | C26 H48 O13 | (M+H)+ |
| 572.3241 | 572.3253 | 2.02      | 1 | 4700.17   | C26 H48 O13 | (M+H)+ |
| 608.3872 |          |           | 1 | 250745.34 |             |        |
| 613.3434 |          |           | 1 | 734516.75 |             |        |
| 657.3894 |          |           | 1 | 555389.63 |             |        |

MSMS Spectrum

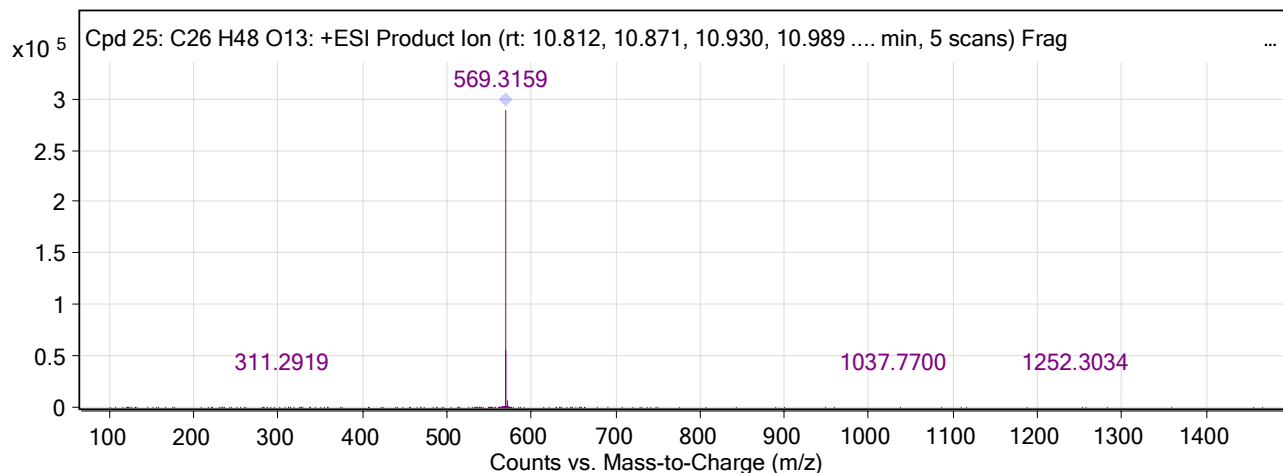

MS/MS Spectrum PeakList

| m/z      | Calc m/z | Diff(ppm)  | z | Abund     |
|----------|----------|------------|---|-----------|
| 133.0873 | 133.0859 | -10.6      |   | 24.42     |
| 157.1219 | 157.1223 | 2.31       |   | 11.82     |
| 232.129  | 232.1305 | 6.44       |   | 22.89     |
| 235.1626 | 235.1693 | 28.44      |   | 12.22     |
| 311.2919 | 311.2945 | 8.09       |   | 26.41     |
| 312.2979 | 312.3023 | 13.92      |   | 21.13     |
| 495.3114 | 495.3164 | 9.98       |   | 11.36     |
| 531.3026 | 531.3011 | -2.74      |   | 19.61     |
| 566.2986 | 283.1464 | -500005.14 | 2 | 53.71     |
| 569.3159 | 569.3168 | 1.51       | 1 | 289283.22 |

| Compound Label         | m/z      | RT     | Algorithm  | Mass     |
|------------------------|----------|--------|------------|----------|
| Cpd 26: C24 H46 N3 O12 | 569.3166 | 11.227 | Auto MS/MS | 568.3092 |

Compound Chromatograms

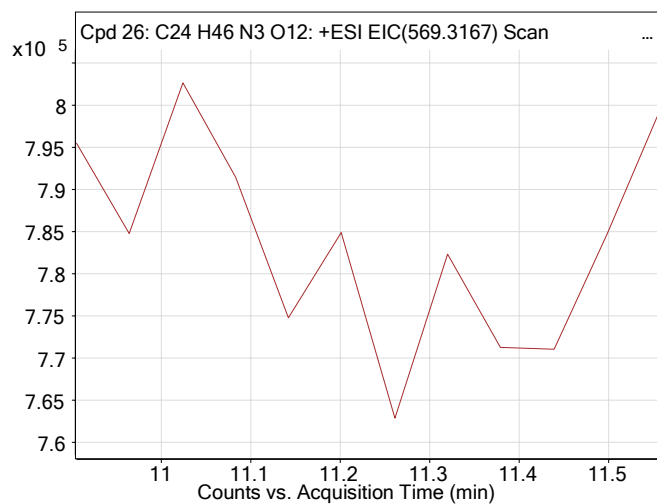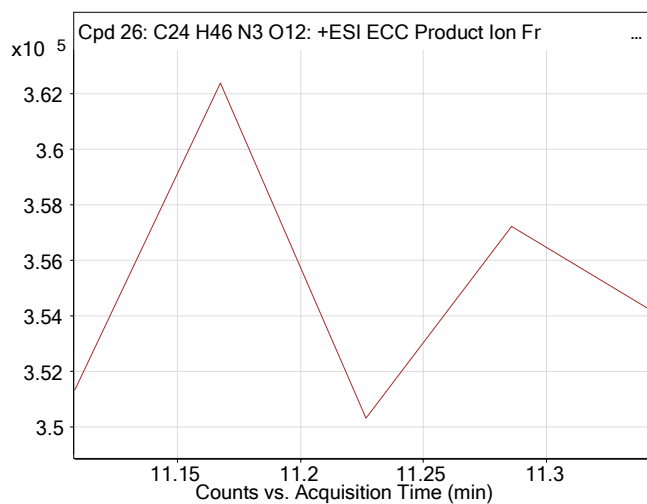

MS Spectrum

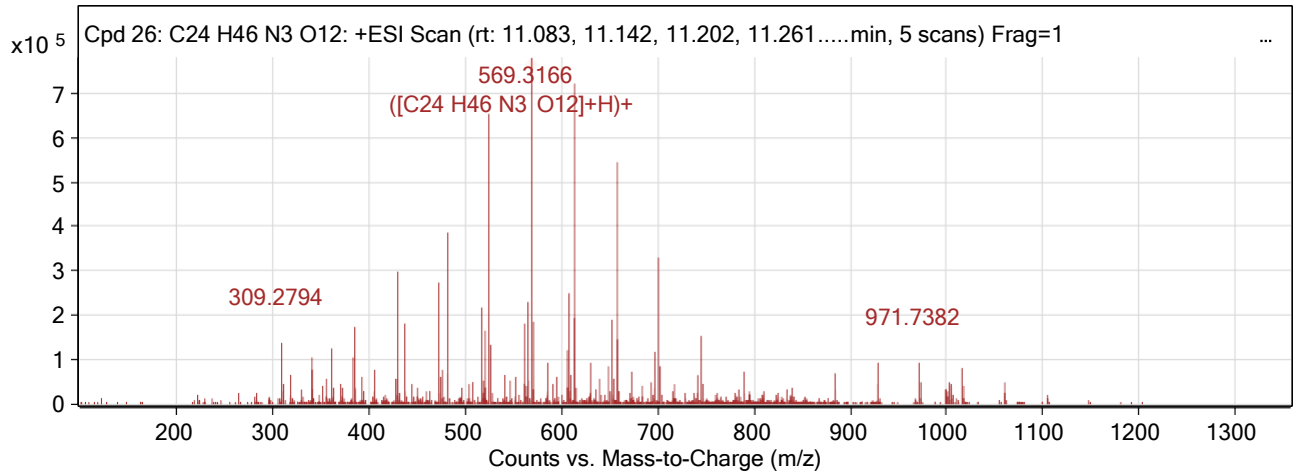

MS Zoomed Spectrum

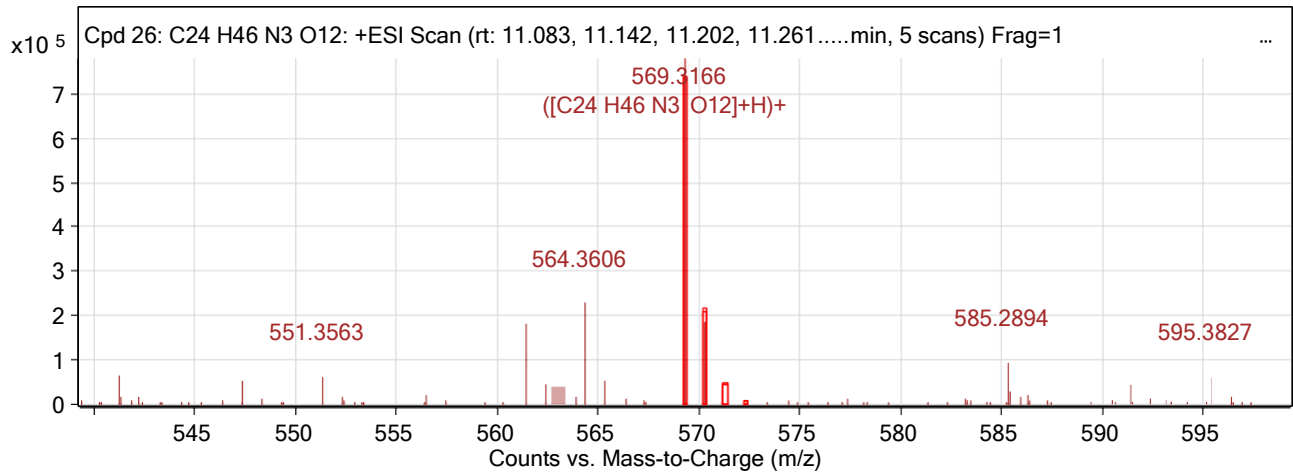

MS Spectrum Peak List

| m/z      | Calc m/z | Diff(ppm) | z | Abund     | Formula                                                        | Ion                |
|----------|----------|-----------|---|-----------|----------------------------------------------------------------|--------------------|
| 429.3199 |          |           | 1 | 296346    |                                                                |                    |
| 481.2633 |          |           | 1 | 386939.63 |                                                                |                    |
| 525.2901 |          |           | 1 | 649624.63 |                                                                |                    |
| 569.3166 | 569.3154 | -2.15     | 1 | 779273.63 | C <sub>24</sub> H <sub>46</sub> N <sub>3</sub> O <sub>12</sub> | (M+H) <sup>+</sup> |
| 570.3192 | 570.3186 | -1        | 1 | 185373.28 | C <sub>24</sub> H <sub>46</sub> N <sub>3</sub> O <sub>12</sub> | (M+H) <sup>+</sup> |
| 571.3212 | 571.3209 | -0.36     | 1 | 31541.94  | C <sub>24</sub> H <sub>46</sub> N <sub>3</sub> O <sub>12</sub> | (M+H) <sup>+</sup> |
| 572.3239 | 572.3235 | -0.65     | 1 | 4477.37   | C <sub>24</sub> H <sub>46</sub> N <sub>3</sub> O <sub>12</sub> | (M+H) <sup>+</sup> |
| 613.3432 |          |           | 1 | 719369.75 |                                                                |                    |
| 657.3691 |          |           | 1 | 542814.75 |                                                                |                    |
| 701.3952 |          |           | 1 | 328484.91 |                                                                |                    |

MSMS Spectrum

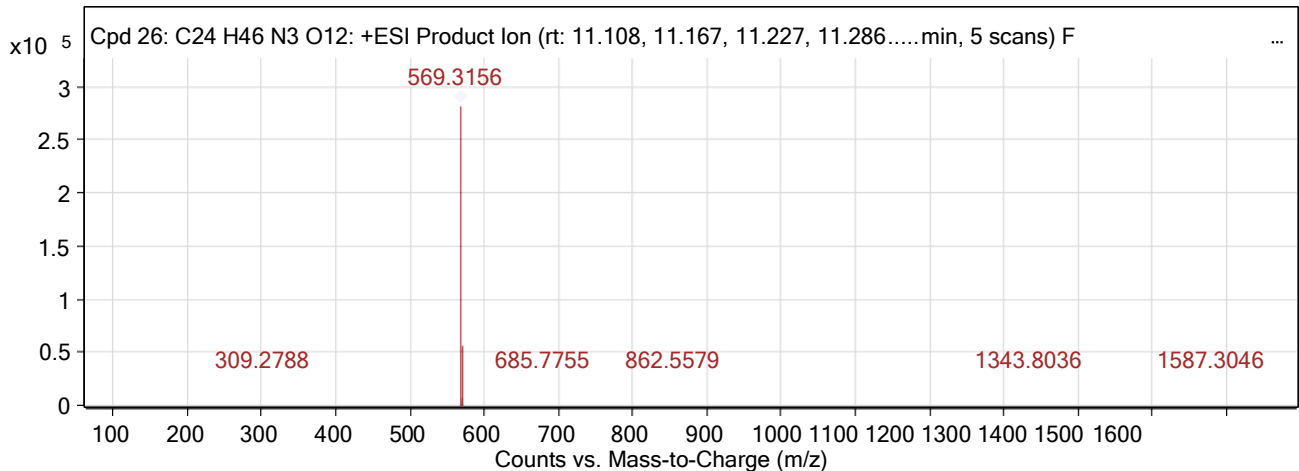

**MS/MS Spectrum Peak List**

| m/z      | Calc m/z | Diff(ppm)  | z | Abund     |
|----------|----------|------------|---|-----------|
| 265.2543 | 265.2526 | -6.55      |   | 16.32     |
| 283.2604 | 283.2618 | 4.93       |   | 25.62     |
| 307.217  | 307.2142 | -9.08      |   | 14.11     |
| 309.2788 | 309.2788 | 0.09       |   | 41.01     |
| 311.2951 | 311.2945 | -1.96      |   | 12.83     |
| 312.2988 | 312.3009 | 6.97       |   | 16.92     |
| 407.3022 | 407.303  | 1.96       |   | 12.84     |
| 425.2702 | 425.2732 | 6.92       |   | 14.94     |
| 568.3006 | 284.1535 | -499994.28 | 2 | 515.75    |
| 569.3156 | 569.3154 | -0.39      | 1 | 281042.03 |

| Compound Label      | m/z     | RT     | Algorithm  | Mass     |
|---------------------|---------|--------|------------|----------|
| Cpd 27: C26 H48 O13 | 569.317 | 11.523 | Auto MS/MS | 568.3096 |

**Compound Chromatograms**

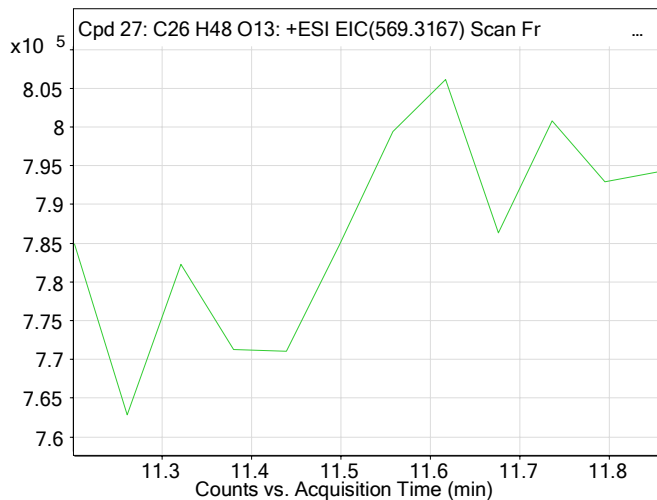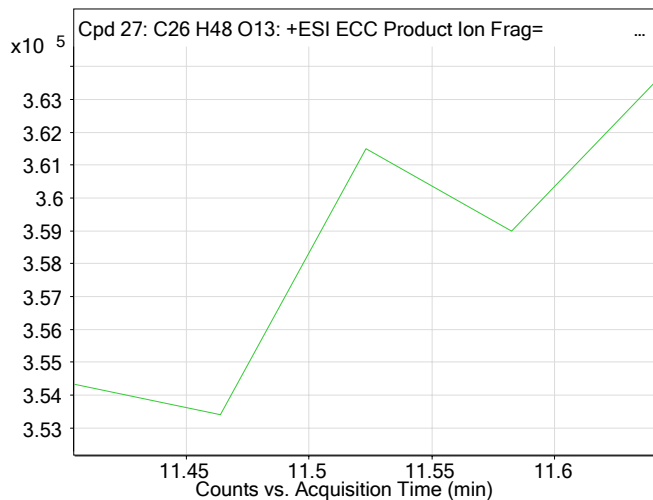

MS Spectrum

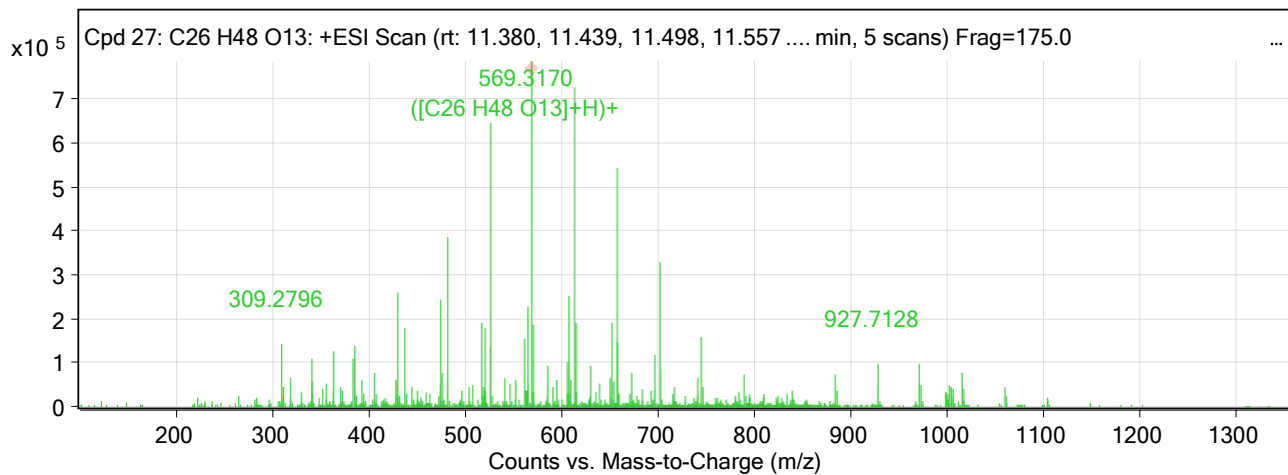

MS Zoomed Spectrum



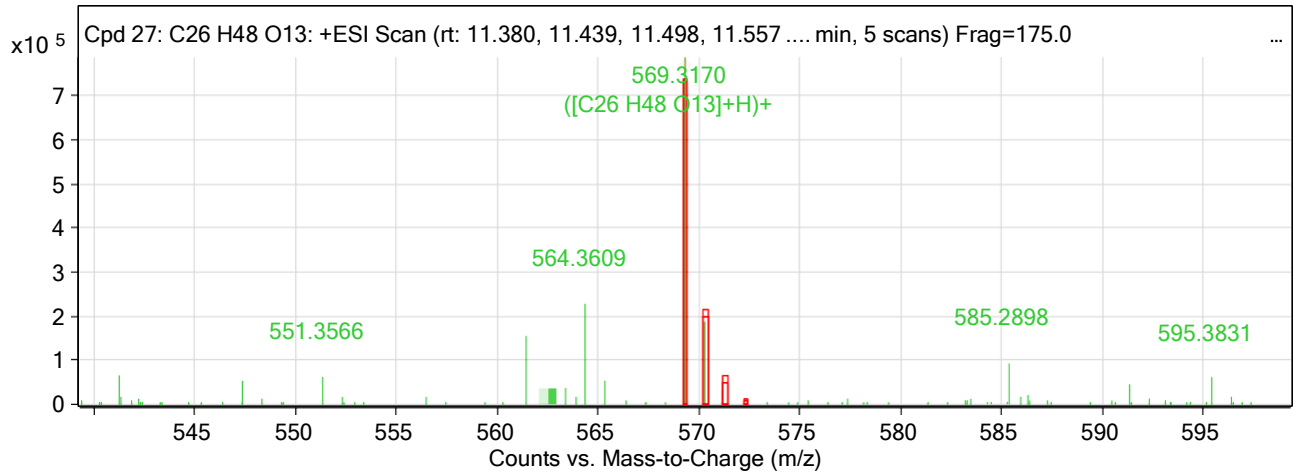

**MS Spectrum Peak List**

| m/z      | Calc m/z | Diff(ppm) | z | Abund     | Formula     | Ion    |
|----------|----------|-----------|---|-----------|-------------|--------|
| 429.3201 |          |           | 1 | 257915.08 |             |        |
| 481.2636 |          |           | 1 | 384128.44 |             |        |
| 525.2906 |          |           | 1 | 644422.69 |             |        |
| 569.317  | 569.3168 | -0.49     | 1 | 786512.19 | C26 H48 O13 | (M+H)+ |
| 570.3196 | 570.3202 | 1.07      | 1 | 186662.63 | C26 H48 O13 | (M+H)+ |
| 571.3216 | 571.3226 | 1.82      | 1 | 31462.27  | C26 H48 O13 | (M+H)+ |
| 572.3243 | 572.3253 | 1.73      | 1 | 4529.78   | C26 H48 O13 | (M+H)+ |
| 613.3436 |          |           | 1 | 726811.81 |             |        |
| 657.3695 |          |           | 1 | 543504.5  |             |        |
| 701.3956 |          |           | 1 | 330184.31 |             |        |

**MS/MS Spectrum**

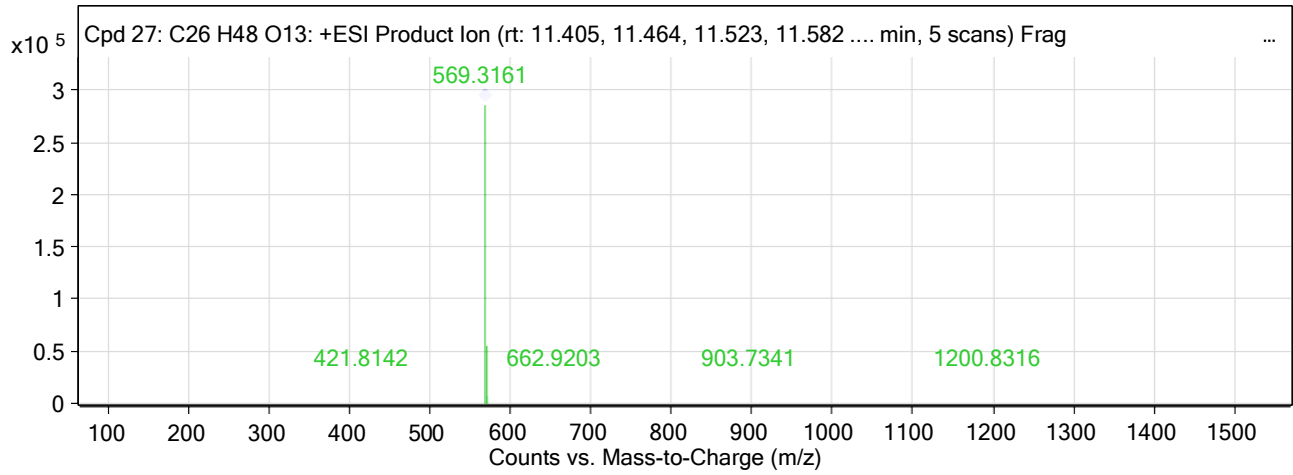

**MS/MS Spectrum PeakList**

| m/z      | Calc m/z | Diff(ppm)  | z | Abund     |
|----------|----------|------------|---|-----------|
| 101.0595 | 101.0597 | 2.02       |   | 13.36     |
| 109.1005 | 109.1012 | 6.21       |   | 14.78     |
| 111.082  | 111.0804 | -14.03     |   | 12.14     |
| 133.0874 | 133.0859 | -10.75     |   | 50.29     |
| 188.103  | 188.1043 | 6.87       |   | 11.21     |
| 283.2645 | 283.2632 | -4.76      |   | 12.64     |
| 309.2768 | 309.2788 | 6.37       |   | 19.5      |
| 538.2895 | 269.1489 | -499992.26 | 2 | 11        |
| 539.3059 |          |            | 2 | 14.57     |
| 569.3161 | 569.3168 | 1.16       | 1 | 285353.16 |

| Compound Label      | m/z      | RT    | Algorithm  | Mass     |
|---------------------|----------|-------|------------|----------|
| Cpd 28: C26 H48 O13 | 569.3167 | 11.82 | Auto MS/MS | 568.3093 |

**Compound Chromatograms**

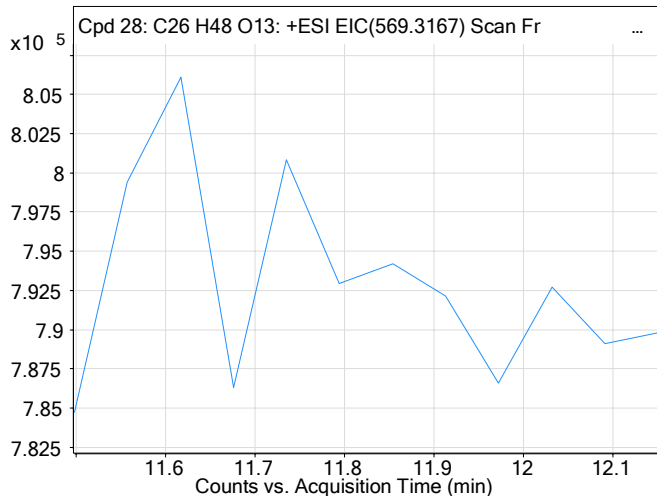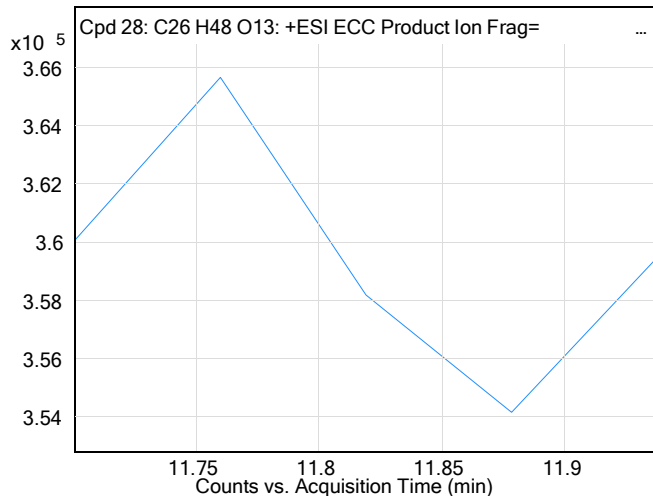

MS Spectrum

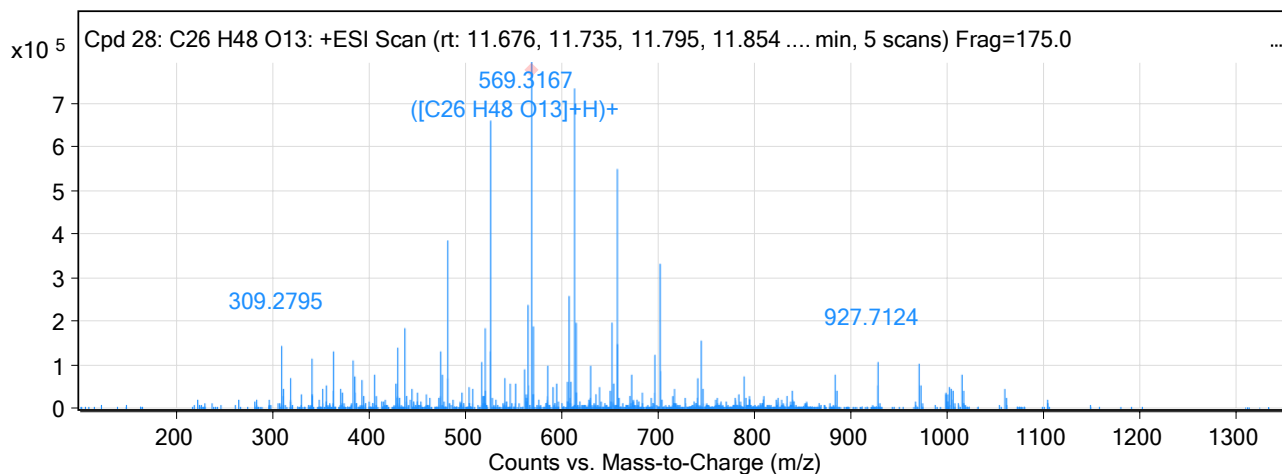

MS Zoomed Spectrum

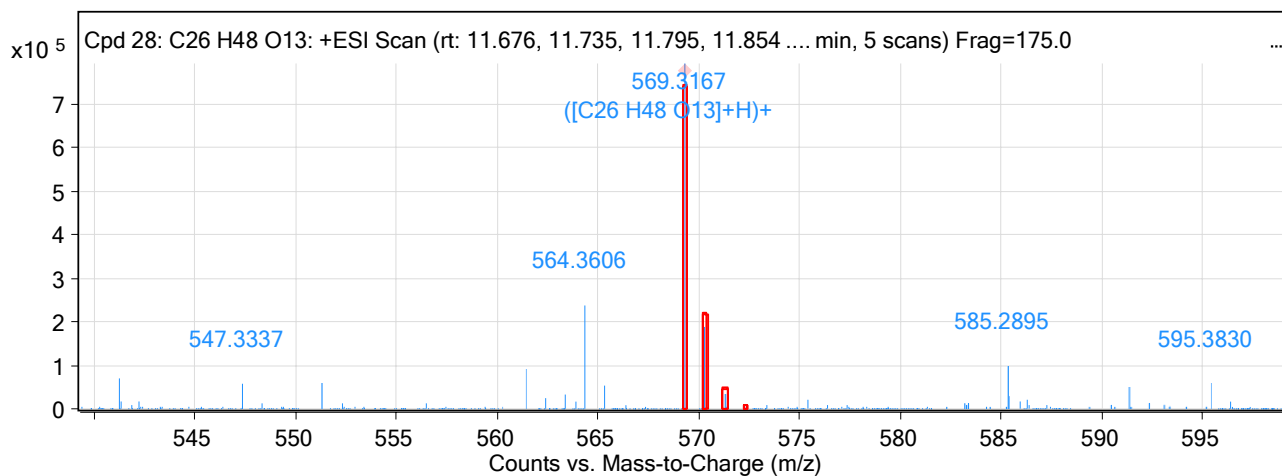

MS Spectrum Peak List

| m/z      | Calc m/z | Diff(ppm) | z | Abund     | Formula     | Ion    |
|----------|----------|-----------|---|-----------|-------------|--------|
| 481.2633 |          |           | 1 | 385756.25 |             |        |
| 525.2902 |          |           | 1 | 657172.19 |             |        |
| 569.3167 | 569.3168 | 0.06      | 1 | 793300.38 | C26 H48 O13 | (M+H)+ |
| 570.3193 | 570.3202 | 1.58      | 1 | 187327.77 | C26 H48 O13 | (M+H)+ |
| 571.3215 | 571.3226 | 1.97      | 1 | 31827.95  | C26 H48 O13 | (M+H)+ |
| 572.3243 | 572.3253 | 1.74      | 1 | 4733.86   | C26 H48 O13 | (M+H)+ |
| 608.3871 |          |           | 1 | 258926.13 |             |        |
| 613.3432 |          |           | 1 | 732383.06 |             |        |

MSMS Spectrum

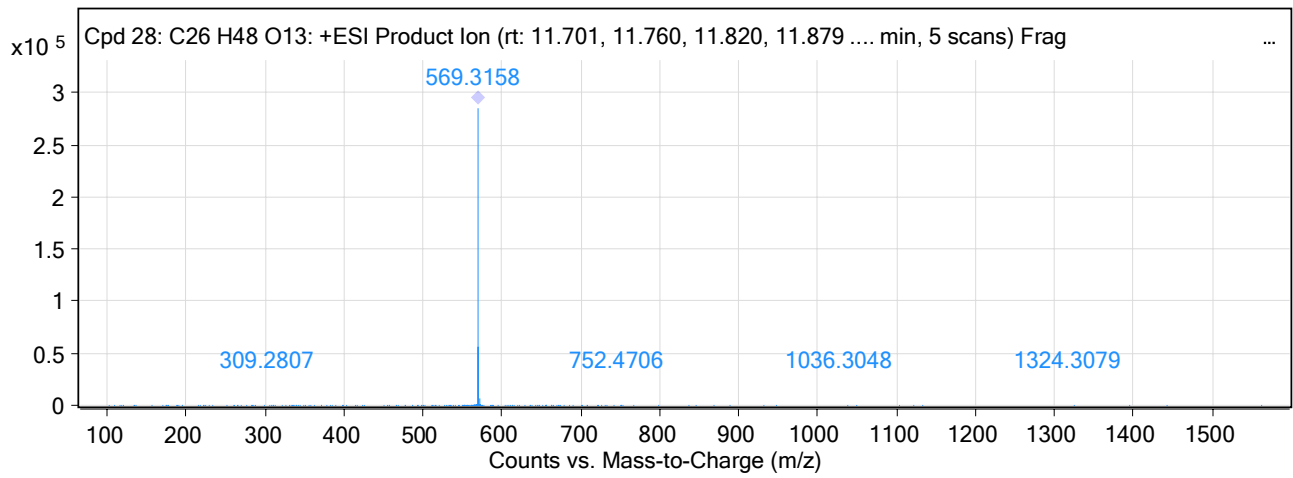

MS/MS Spectrum Peak List

| m/z      | Calc m/z | Diff(ppm) | z | Abund     |
|----------|----------|-----------|---|-----------|
| 109.1009 | 109.1012 | 2.6       |   | 12.5      |
| 117.0908 | 117.091  | 1.5       |   | 14.6      |
| 133.0865 | 133.0859 | -4.59     |   | 25.79     |
| 175.1317 | 175.1329 | 6.86      |   | 22.92     |
| 177.1124 | 177.1121 | -1.66     |   | 21.8      |
| 221.1375 | 221.1384 | 3.96      |   | 23.07     |
| 307.2195 | 307.2268 | 23.58     |   | 14.45     |
| 309.2807 | 309.2788 | -6.23     |   | 51.96     |
| 385.206  | 385.2068 | 2.21      |   | 11.2      |
| 569.3158 | 569.3168 | 1.73      | 1 | 285414.25 |

| Compound Label      | m/z     | RT     | Algorithm  | Mass     |
|---------------------|---------|--------|------------|----------|
| Cpd 29: C26 H48 O13 | 569.317 | 12.116 | Auto MS/MS | 568.3095 |

Compound Chromatograms

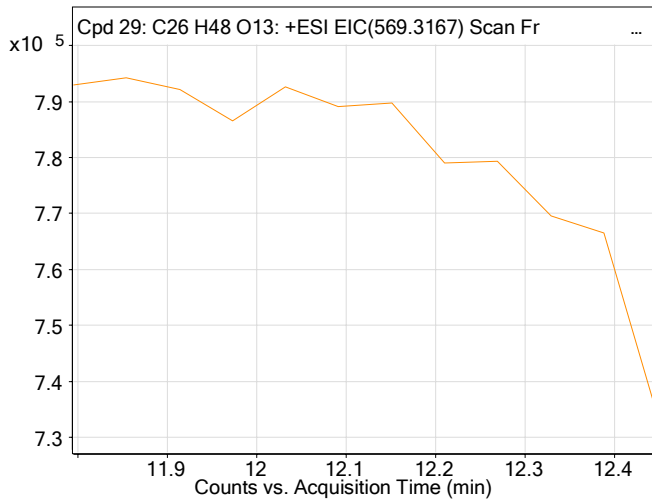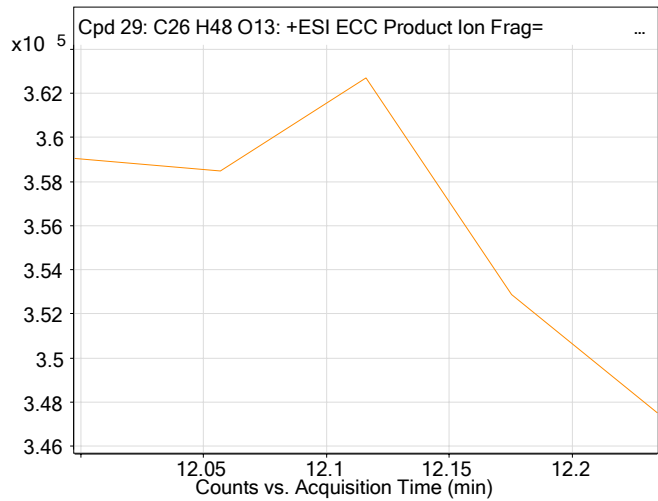

MS Spectrum

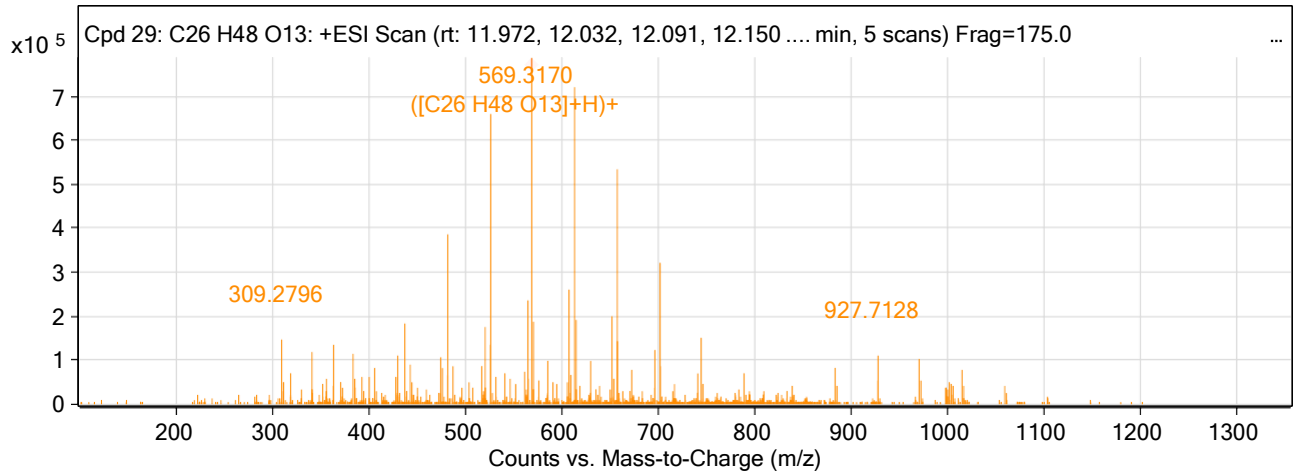

MS Zoomed Spectrum

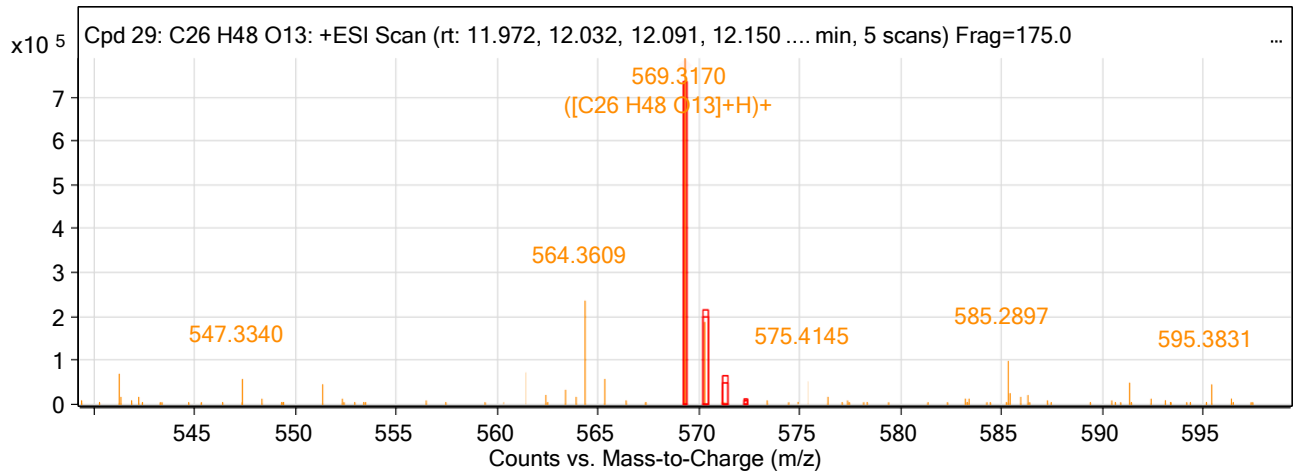

MS Spectrum Peak List

| m/z      | Calc m/z | Diff(ppm) | z | Abund     | Formula     | Ion    |
|----------|----------|-----------|---|-----------|-------------|--------|
| 481.2636 |          |           | 1 | 386061.22 |             |        |
| 525.2903 |          |           | 1 | 658030.38 |             |        |
| 569.317  | 569.3168 | -0.39     | 1 | 787438.13 | C26 H48 O13 | (M+H)+ |
| 570.3195 | 570.3202 | 1.17      | 1 | 186186.34 | C26 H48 O13 | (M+H)+ |
| 571.3217 | 571.3226 | 1.59      | 1 | 31113.96  | C26 H48 O13 | (M+H)+ |
| 572.3246 | 572.3253 | 1.23      | 1 | 4305.29   | C26 H48 O13 | (M+H)+ |
| 608.3874 |          |           | 1 | 258804.25 |             |        |
| 613.3435 |          |           | 1 | 716779.38 |             |        |
| 657.3695 |          |           | 1 | 533896.13 |             |        |
| 701.3956 |          |           | 1 | 320209.78 |             |        |

MSMS Spectrum

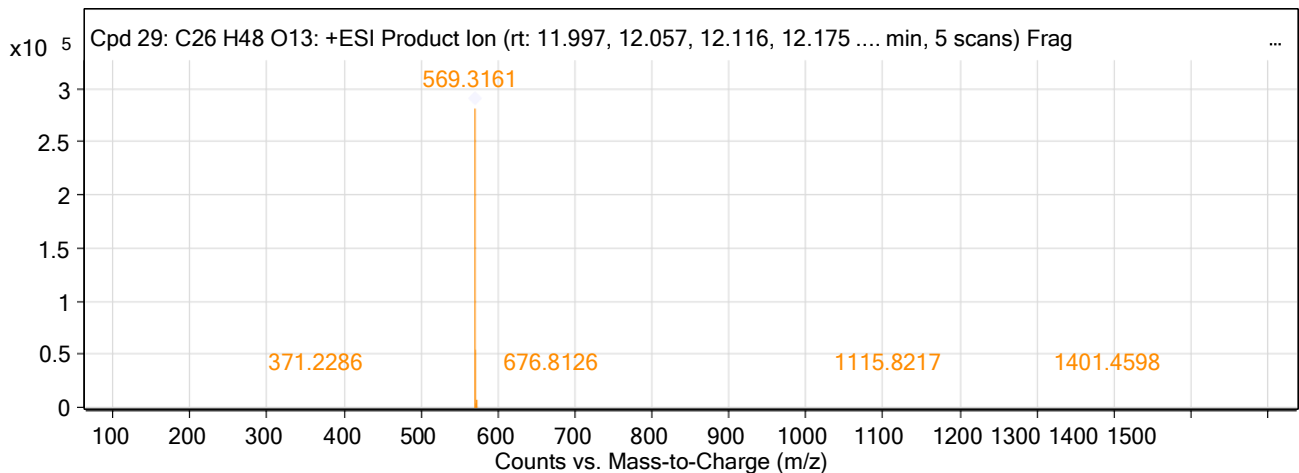

**MS/MS Spectrum Peak List**

| m/z      | Calc m/z | Diff(ppm)  | z | Abund     |
|----------|----------|------------|---|-----------|
| 102.0665 | 102.0675 | 9.97       |   | 13.63     |
| 133.0854 | 133.0859 | 3.81       | 1 | 65.15     |
| 177.1125 | 177.1121 | -1.84      |   | 35.72     |
| 261.1324 | 261.1333 | 3.32       |   | 11.86     |
| 309.2796 | 309.2788 | -2.66      |   | 15.97     |
| 311.2984 | 311.2945 | -12.52     |   | 12.94     |
| 404.2419 | 404.2405 | -3.65      |   | 12.54     |
| 539.3054 | 269.6528 | -499999.76 | 2 | 19.22     |
| 567.2926 | 283.6503 | -499993    | 2 | 18.99     |
| 569.3161 | 569.3168 | 1.18       | 1 | 281254.31 |

| Compound Label      | m/z      | RT     | Algorithm  | Mass     |
|---------------------|----------|--------|------------|----------|
| Cpd 30: C26 H48 O13 | 569.3168 | 12.413 | Auto MS/MS | 568.3093 |

**Compound Chromatograms**

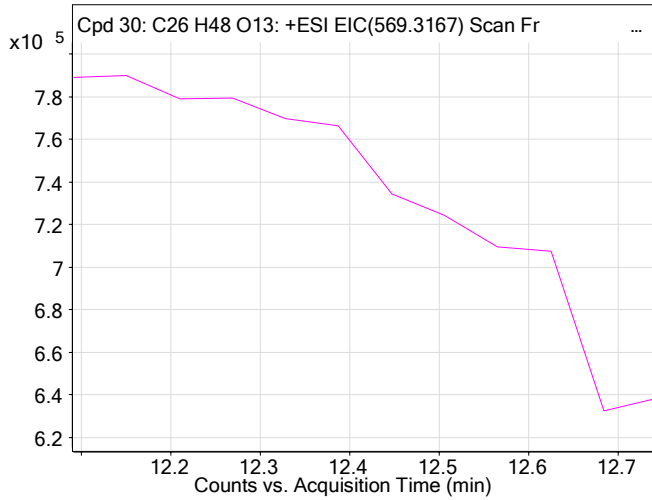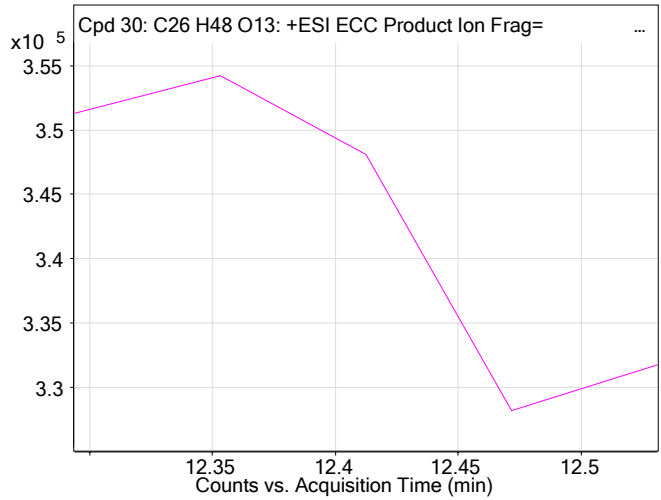

MS Spectrum

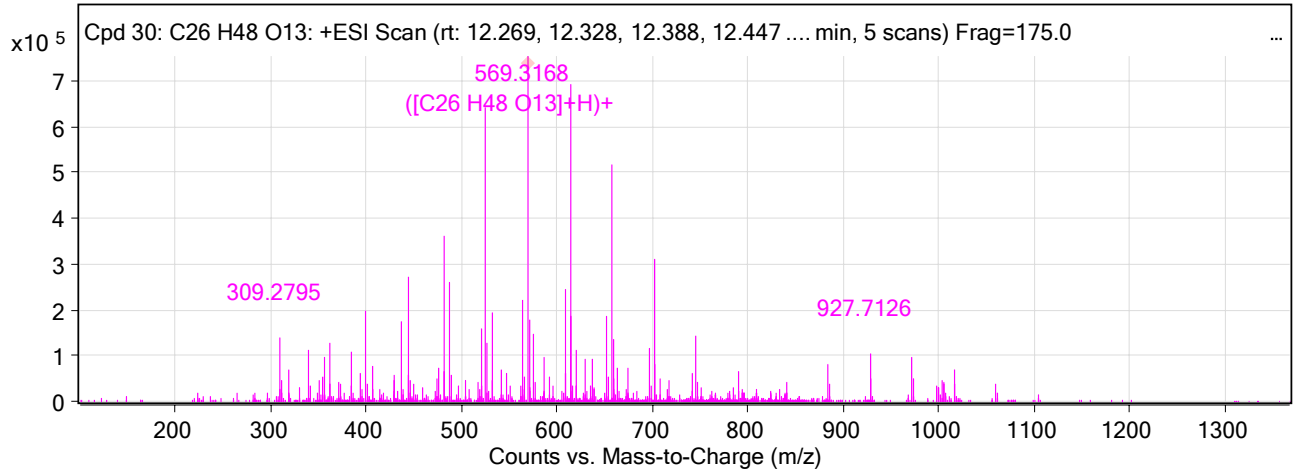

MS Zoomed Spectrum

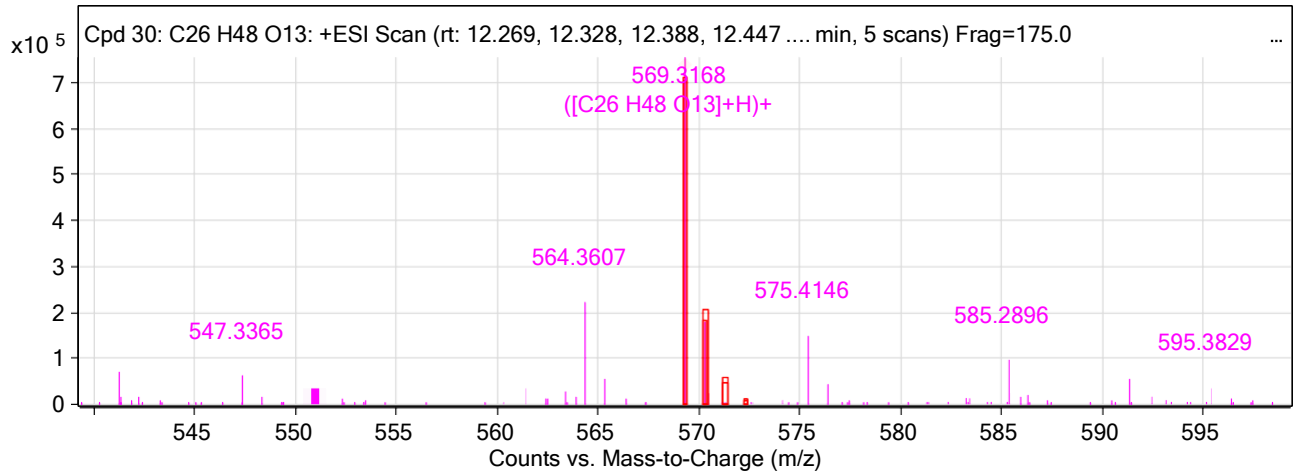

**MS Spectrum Peak List**

| m/z      | Calc m/z | Diff(ppm) | z | Abund     | Formula     | Ion    |
|----------|----------|-----------|---|-----------|-------------|--------|
| 443.3356 |          |           | 1 | 271377.5  |             |        |
| 481.2634 |          |           | 1 | 363371.97 |             |        |
| 525.2901 |          |           | 1 | 641077.75 |             |        |
| 569.3168 | 569.3168 | -0.06     | 1 | 754825.5  | C26 H48 O13 | (M+H)+ |
| 570.3193 | 570.3202 | 1.48      | 1 | 177304.19 | C26 H48 O13 | (M+H)+ |
| 571.3213 | 571.3226 | 2.2       | 1 | 29733.88  | C26 H48 O13 | (M+H)+ |
| 572.3242 | 572.3253 | 1.84      | 1 | 4491.78   | C26 H48 O13 | (M+H)+ |
| 613.3433 |          |           | 1 | 692214.81 |             |        |
| 657.3692 |          |           | 1 | 518225.81 |             |        |
| 701.3953 |          |           | 1 | 311619.81 |             |        |

**MS/MS Spectrum**

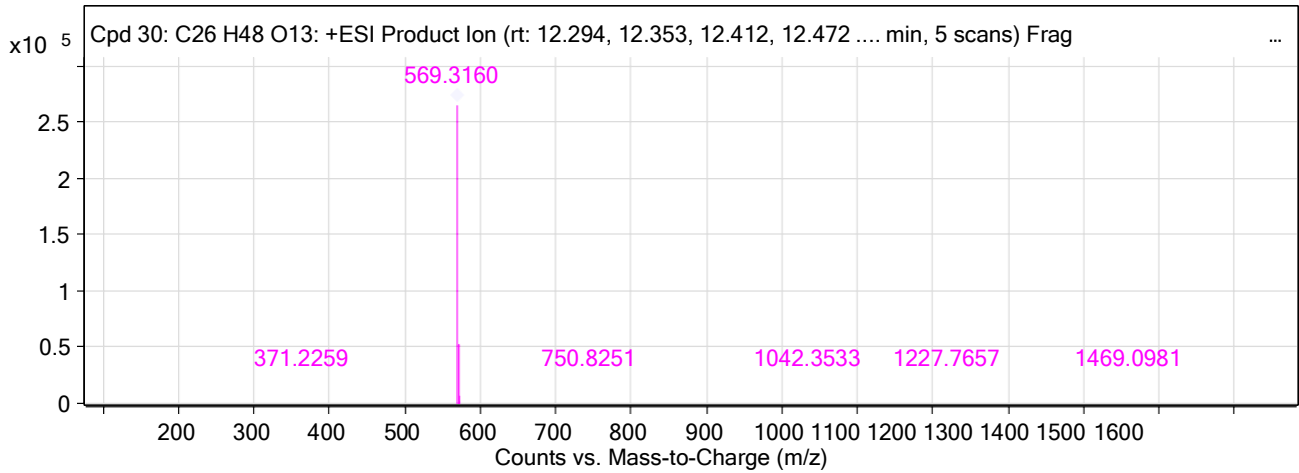

**MS/MS Spectrum PeakList**

| m/z      | Calc m/z | Diff(ppm) | z | Abund     |
|----------|----------|-----------|---|-----------|
| 123.0426 | 123.0441 | 11.82     |   | 22.05     |
| 127.1478 | 127.1481 | 2.82      |   | 13.67     |
| 133.0865 | 133.0859 | -4.67     | 1 | 69.19     |
| 177.1112 | 177.1121 | 5.18      |   | 21.13     |
| 210.1197 | 210.125  | 25.47     |   | 17.6      |
| 228.2836 | 228.2812 | -10.83    |   | 14.76     |
| 309.2771 | 309.2788 | 5.38      |   | 30.43     |
| 311.2958 | 311.2945 | -4.17     |   | 25.43     |
| 444.2764 | 444.2718 | -10.32    |   | 13.56     |
| 569.316  | 569.3168 | 1.43      | 1 | 264911.88 |

| Compound Label        | m/z      | RT     | Algorithm  | Mass    |
|-----------------------|----------|--------|------------|---------|
| Cpd 31: C25 H48 N3 O6 | 487.3625 | 12.777 | Auto MS/MS | 486.355 |

**Compound Chromatograms**

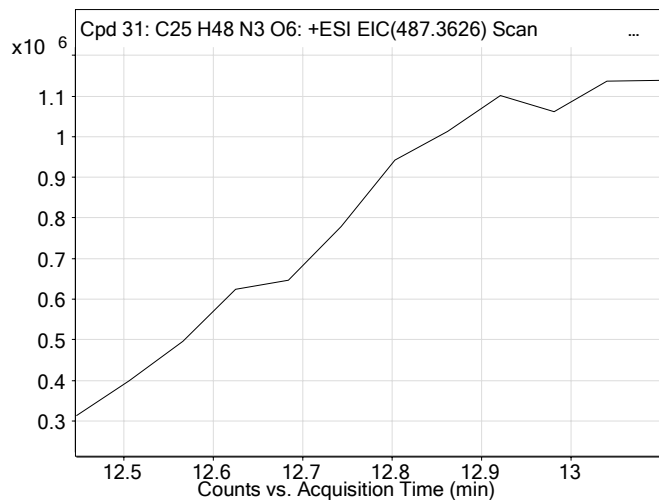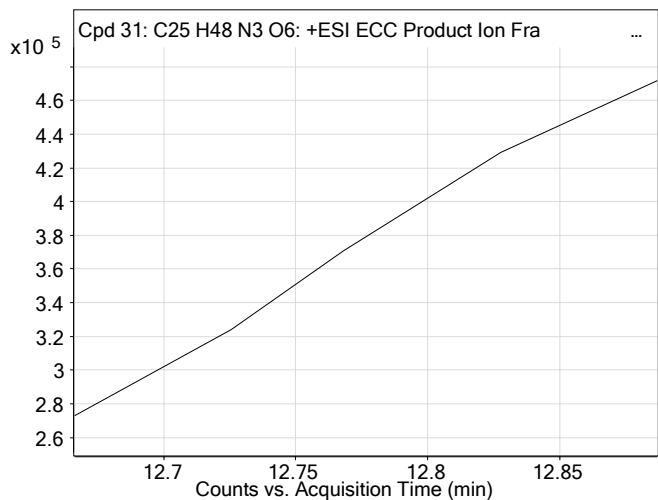

MS Spectrum

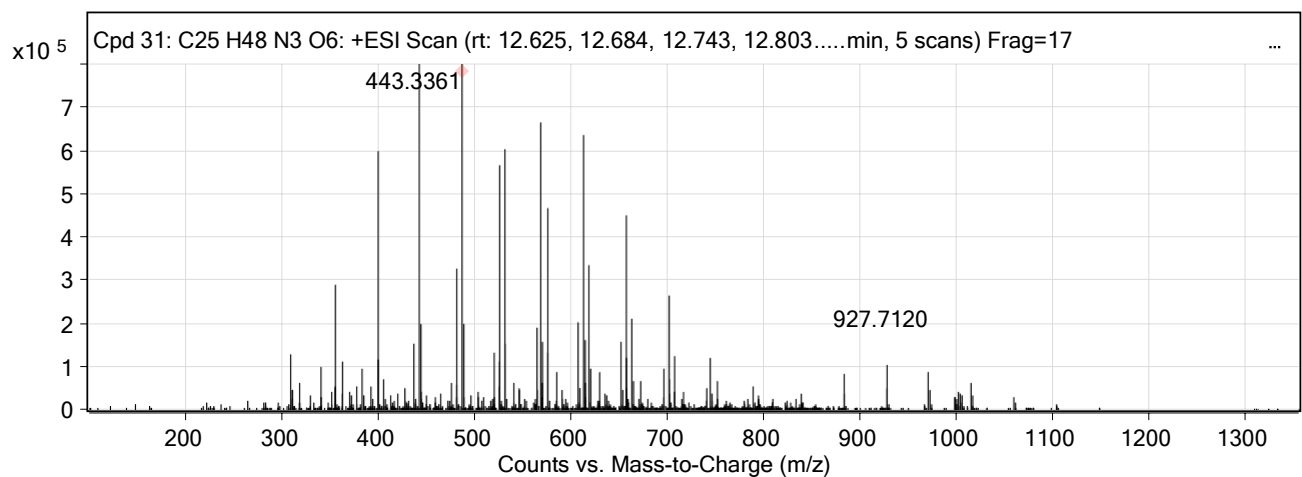

MS Zoomed Spectrum

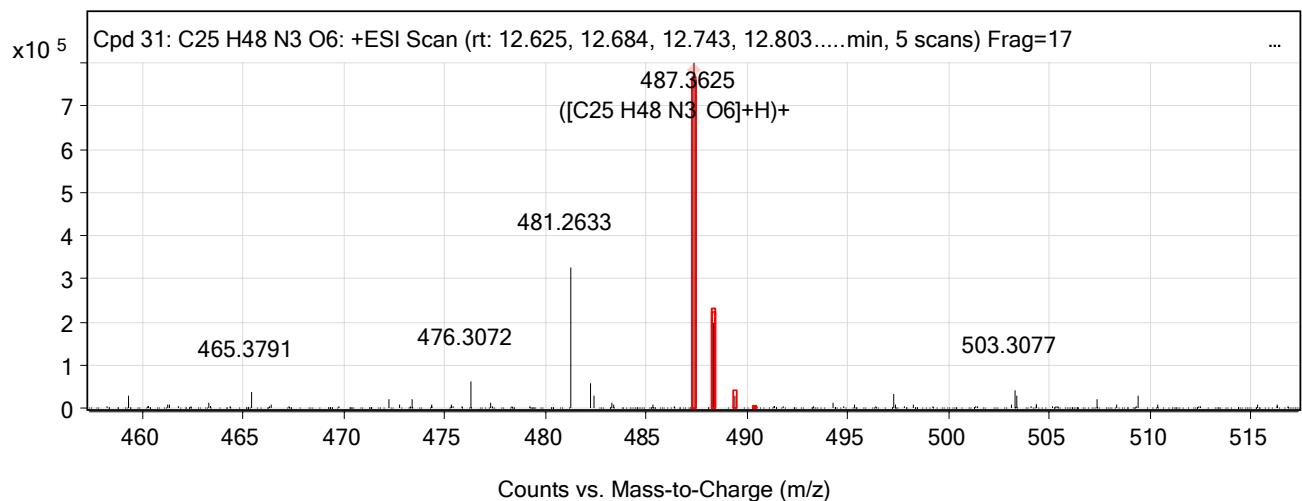

MS Spectrum Peak List

| m/z      | Calc m/z | Diff(ppm) | z | Abund     | Formula       | Ion    |
|----------|----------|-----------|---|-----------|---------------|--------|
| 399.3095 |          |           | 1 | 599186.94 |               |        |
| 443.3361 |          |           | 1 | 818220.13 |               |        |
| 487.3625 | 487.3616 | -1.8      | 1 | 801053.81 | C25 H48 N3 O6 | (M+H)+ |
| 488.3652 | 488.3648 | -0.86     | 1 | 199442.89 | C25 H48 N3 O6 | (M+H)+ |
| 489.3668 | 489.3674 | 1.37      | 1 | 29107.23  | C25 H48 N3 O6 | (M+H)+ |
| 490.3682 | 490.3701 | 3.71      | 1 | 3896.41   | C25 H48 N3 O6 | (M+H)+ |
| 525.2899 |          |           | 1 | 564760.81 |               |        |
| 531.3886 |          |           | 1 | 603833.94 |               |        |

MSMS Spectrum

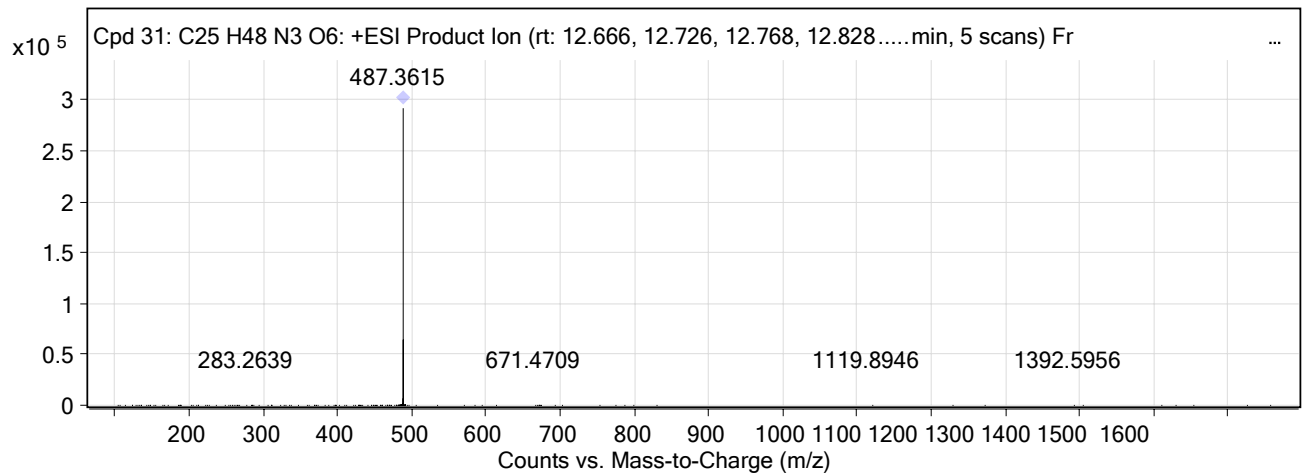

MS/MS Spectrum Peak List

| m/z      | Calc m/z | Diff(ppm) | z | Abund     |
|----------|----------|-----------|---|-----------|
| 133.0874 | 133.0886 | 9.18      |   | 29.05     |
| 135.1177 | 135.1168 | -6.72     |   | 17.18     |
| 166.0881 | 166.0863 | -10.86    |   | 25.67     |
| 265.2539 | 265.2526 | -4.92     |   | 19.34     |
| 283.2639 | 283.2632 | -2.56     | 1 | 219.45    |
| 309.2781 | 309.2775 | -1.9      |   | 53.92     |
| 311.2906 | 311.2931 | 8.1       |   | 21.92     |
| 397.2629 | 397.2585 | -11.18    |   | 47.42     |
| 471.3452 | 471.3429 | -4.9      |   | 22.43     |
| 487.3615 | 487.3616 | 0.11      | 1 | 292393.56 |

| Compound Label                                                        | m/z      | RT     | Algorithm  | Mass     |
|-----------------------------------------------------------------------|----------|--------|------------|----------|
| Cpd 32: C <sub>23</sub> H <sub>44</sub> N <sub>3</sub> O <sub>5</sub> | 443.3363 | 12.806 | Auto MS/MS | 442.3289 |

Compound Chromatograms

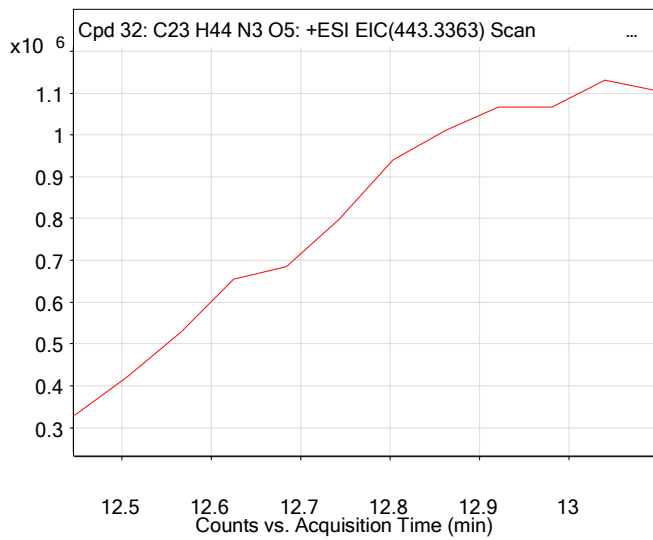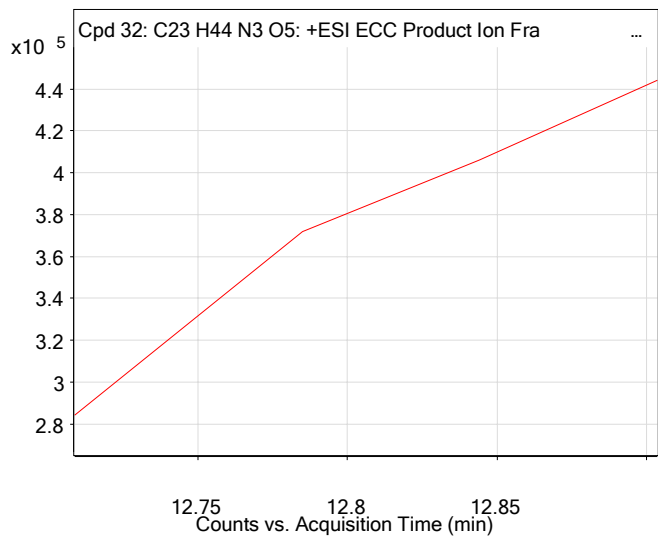

MS Spectrum



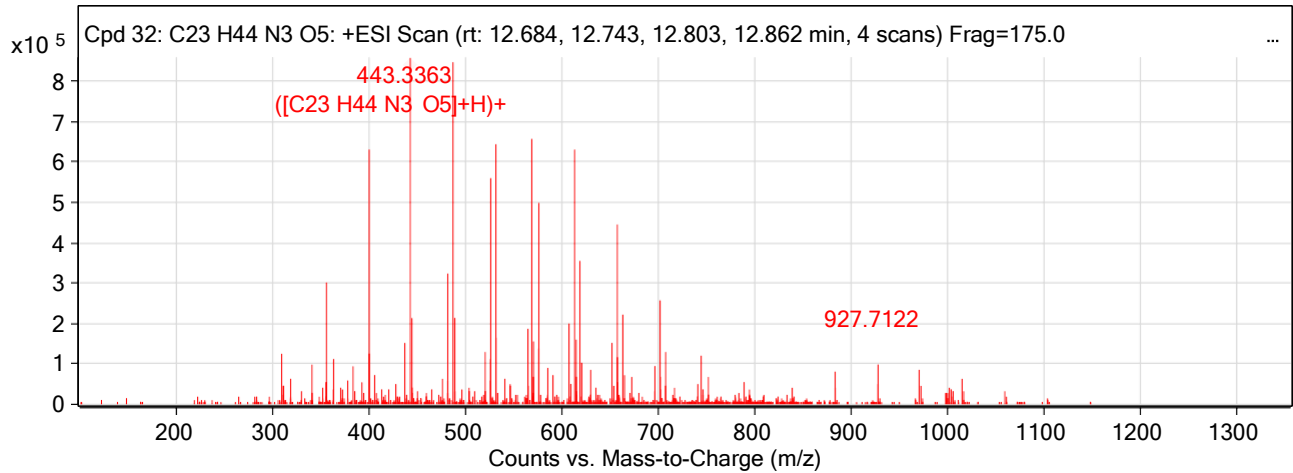

MS Zoomed Spectrum

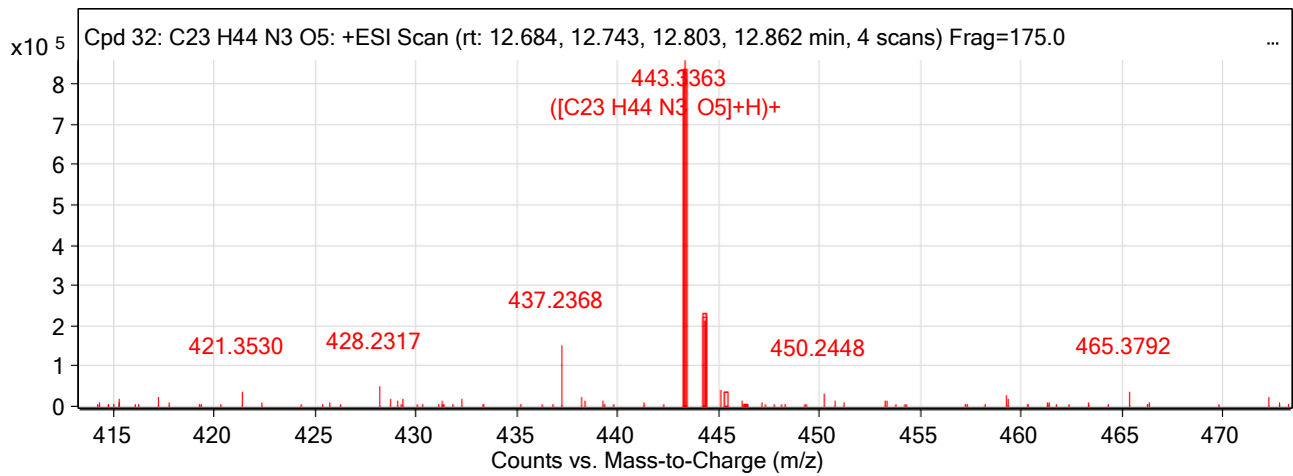

MS Spectrum Peak List

| m/z      | Calc m/z | Diff(ppm) | z | Abund     | Formula                                                       | Ion                |
|----------|----------|-----------|---|-----------|---------------------------------------------------------------|--------------------|
| 399.3096 |          |           | 1 | 629952.81 |                                                               |                    |
| 443.3363 | 443.3354 | -2.05     | 1 | 858966.88 | C <sub>23</sub> H <sub>44</sub> N <sub>3</sub> O <sub>5</sub> | (M+H) <sup>+</sup> |
| 444.339  | 444.3385 | -0.95     | 1 | 210670.41 | C <sub>23</sub> H <sub>44</sub> N <sub>3</sub> O <sub>5</sub> | (M+H) <sup>+</sup> |
| 445.3407 | 445.3412 | 1.11      | 1 | 27400.72  | C <sub>23</sub> H <sub>44</sub> N <sub>3</sub> O <sub>5</sub> | (M+H) <sup>+</sup> |
| 446.3426 | 446.3438 | 2.69      | 1 | 3261.69   | C <sub>23</sub> H <sub>44</sub> N <sub>3</sub> O <sub>5</sub> | (M+H) <sup>+</sup> |
| 487.3626 |          |           | 1 | 845414.63 |                                                               |                    |
| 525.29   |          |           | 1 | 556173.69 |                                                               |                    |
| 531.3888 |          |           | 1 | 640274.94 |                                                               |                    |
| 569.3167 |          |           | 1 | 654377.38 |                                                               |                    |
| 613.3428 |          |           | 1 | 629430.5  |                                                               |                    |

MSMS Spectrum

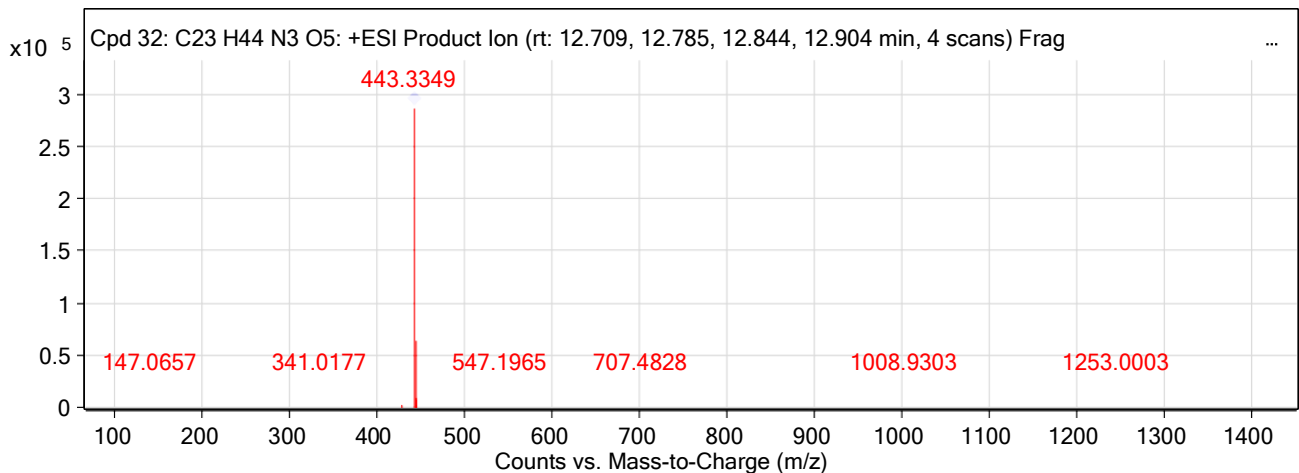

**MS/MS Spectrum Peak List**

| m/z      | Calc m/z | Diff(ppm) | z | Abund     |
|----------|----------|-----------|---|-----------|
| 117.0909 | 117.091  | 0.68      |   | 16.4      |
| 142.0972 | 142.0975 | 2.22      |   | 28.51     |
| 147.0657 | 147.0652 | -3.7      |   | 52.16     |
| 177.1664 | 177.1638 | -14.99    |   | 17.25     |
| 181.0864 | 181.0859 | -2.55     |   | 16.65     |
| 191.1788 | 191.1794 | 3.3       |   | 33.54     |
| 309.2788 | 309.2788 | 0.09      | 1 | 78.13     |
| 315.1727 | 315.1789 | 19.53     |   | 16.39     |
| 442.322  | 442.3275 | 12.49     |   | 205.19    |
| 443.3349 | 443.3354 | 0.97      | 1 | 285968.34 |

| Compound Label        | m/z      | RT     | Algorithm  | Mass     |
|-----------------------|----------|--------|------------|----------|
| Cpd 33: C25 H48 N3 O6 | 487.3625 | 13.065 | Auto MS/MS | 486.3551 |

**Compound Chromatograms**

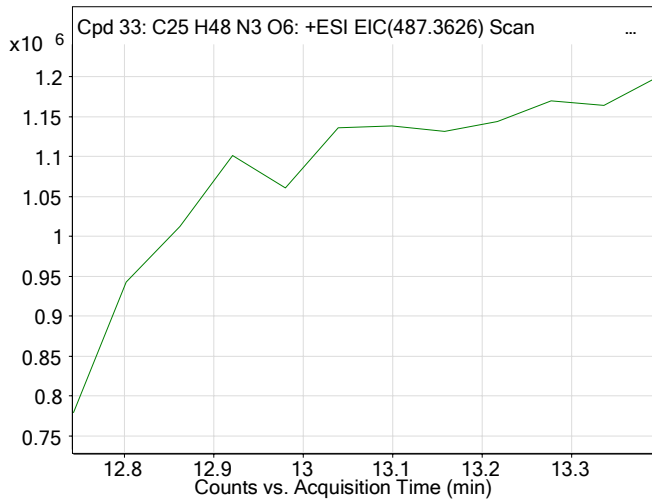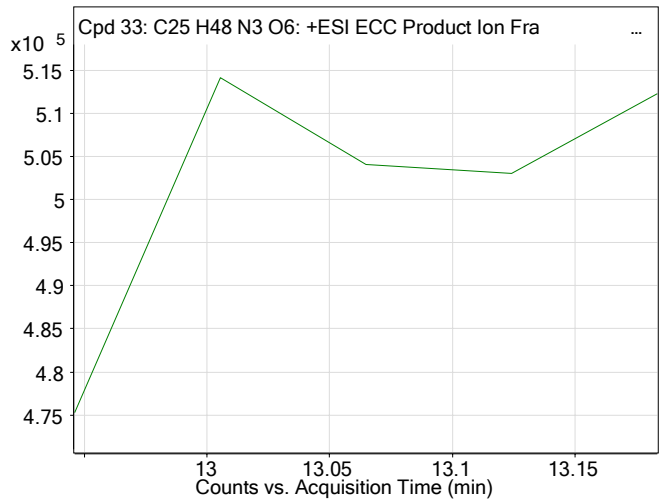

MS Spectrum

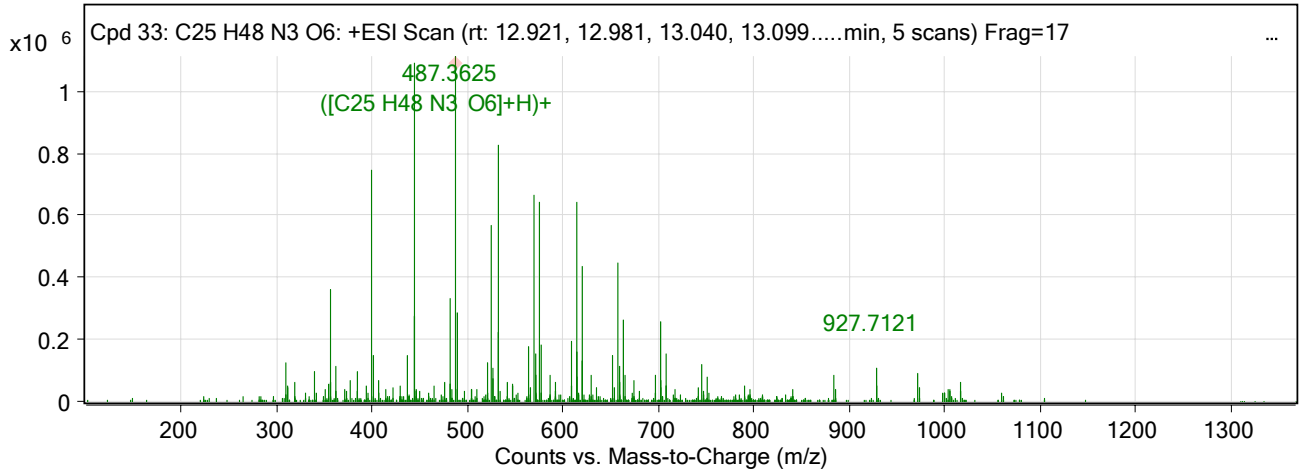

MS Zoomed Spectrum

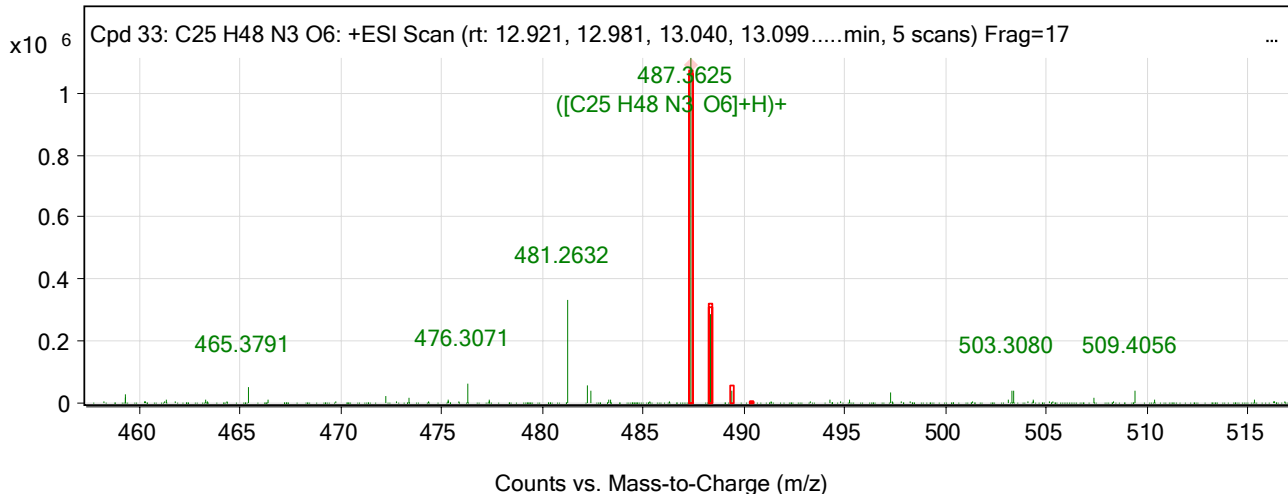

**MS Spectrum Peak List**

| m/z      | Calc m/z | Diff(ppm) | z | Abund      | Formula       | Ion    |
|----------|----------|-----------|---|------------|---------------|--------|
| 399.3096 |          |           | 1 | 745641.88  |               |        |
| 443.3363 |          |           | 1 | 1091508    |               |        |
| 487.3625 | 487.3616 | -1.84     | 1 | 1113760.25 | C25 H48 N3 O6 | (M+H)+ |
| 488.3652 | 488.3648 | -0.96     | 1 | 286090.41  | C25 H48 N3 O6 | (M+H)+ |
| 489.367  | 489.3674 | 0.88      | 1 | 41162.52   | C25 H48 N3 O6 | (M+H)+ |
| 490.3689 | 490.3701 | 2.36      | 1 | 5070.57    | C25 H48 N3 O6 | (M+H)+ |
| 531.389  |          |           | 1 | 827529.56  |               |        |
| 569.3165 |          |           | 1 | 668916.19  |               |        |
| 575.4148 |          |           | 1 | 643300.38  |               |        |
| 613.3426 |          |           | 1 | 640658.88  |               |        |

MSMS Spectrum

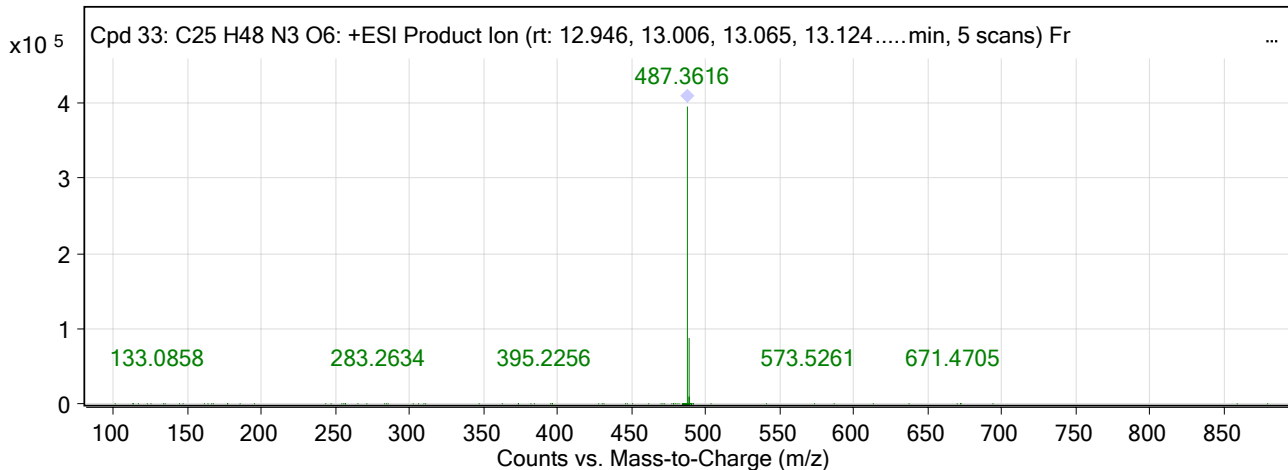

**MS/MS Spectrum PeakList**

| m/z      | Calc m/z | Diff(ppm) | z | Abund     |
|----------|----------|-----------|---|-----------|
| 133.0858 | 133.0859 | 1.06      |   | 30.29     |
| 283.2634 | 283.2632 | -1.03     | 1 | 237.13    |
| 309.2781 | 309.2775 | -2        |   | 89.84     |
| 486.3385 |          |           | 2 | 638.28    |
| 486.8311 |          |           | 2 | 418.49    |
| 487.3616 | 487.3616 | -0.05     | 1 | 396278.94 |
| 488.2768 |          |           | 1 | 620.32    |
| 488.3643 |          |           | 1 | 87285.54  |
| 489.3187 |          |           | 2 | 576       |
| 489.3663 |          |           | 1 | 9552.65   |

| Compound Label        | m/z      | RT     | Algorithm  | Mass     |
|-----------------------|----------|--------|------------|----------|
| Cpd 34: C23 H44 N3 O5 | 443.3363 | 13.081 | Auto MS/MS | 442.3288 |

Compound Chromatograms

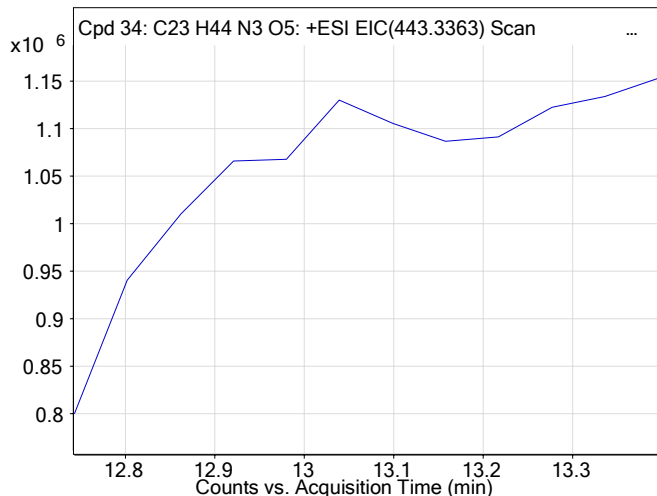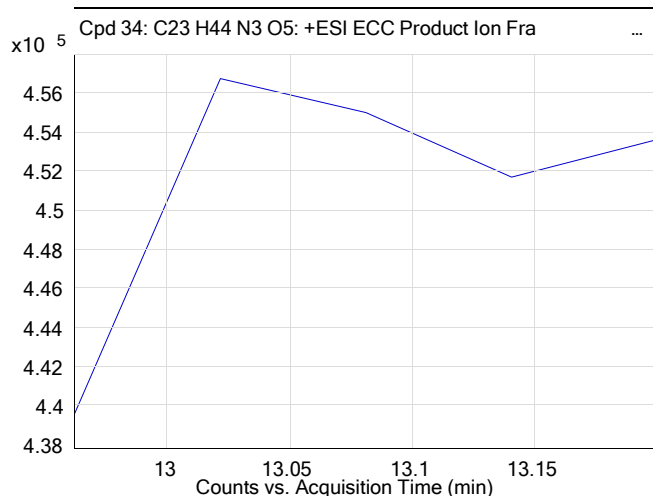

MS Spectrum

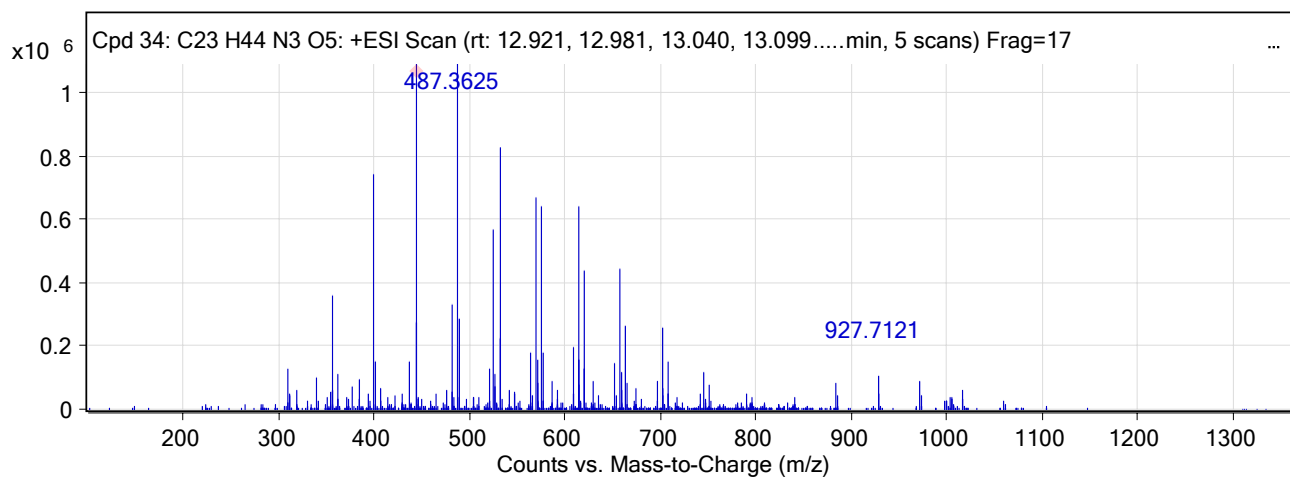

MS Zoomed Spectrum

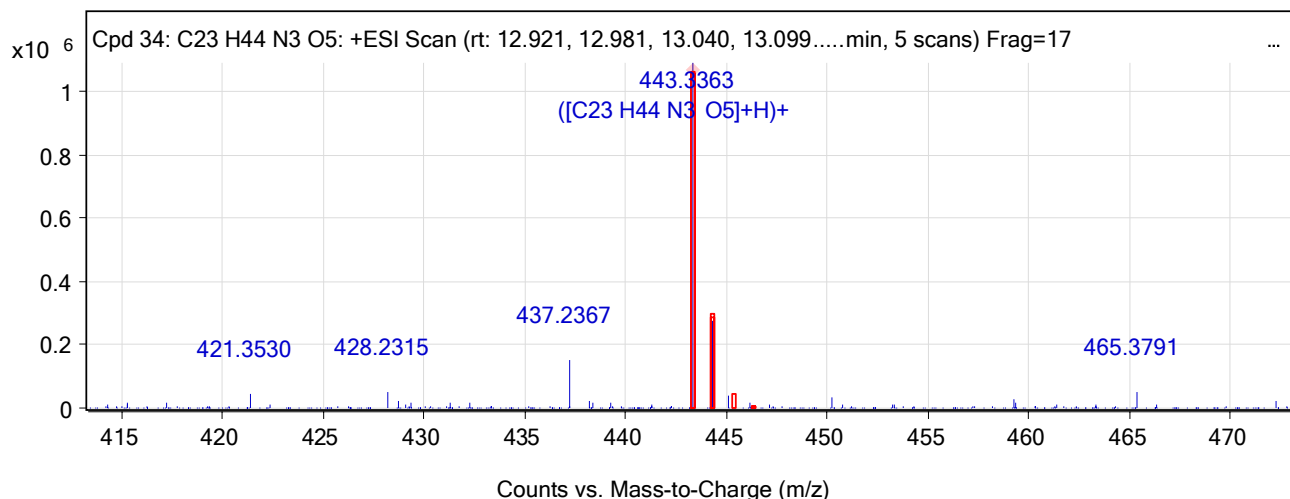

MS Spectrum Peak List

| m/z      | Calc m/z | Diff(ppm) | z | Abund      | Formula       | Ion    |
|----------|----------|-----------|---|------------|---------------|--------|
| 399.3096 |          |           | 1 | 745641.88  |               |        |
| 443.3363 | 443.3354 | -1.98     | 1 | 1091508    | C23 H44 N3 O5 | (M+H)+ |
| 444.339  | 444.3385 | -0.96     | 1 | 273572.47  | C23 H44 N3 O5 | (M+H)+ |
| 445.3408 | 445.3412 | 0.99      | 1 | 34647.34   | C23 H44 N3 O5 | (M+H)+ |
| 446.343  | 446.3438 | 1.86      | 1 | 4030.78    | C23 H44 N3 O5 | (M+H)+ |
| 487.3625 |          |           | 1 | 1113760.25 |               |        |
| 531.389  |          |           | 1 | 827529.56  |               |        |
| 569.3165 |          |           | 1 | 668916.19  |               |        |

MSMS Spectrum

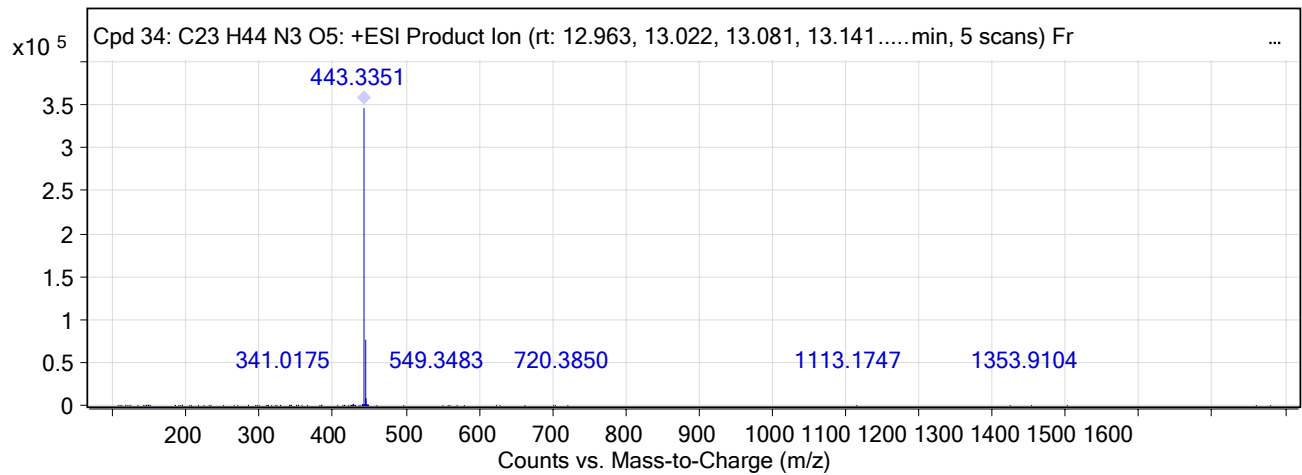

MS/MS Spectrum PeakList

| m/z      | Calc m/z | Diff(ppm) | z | Abund     |
|----------|----------|-----------|---|-----------|
| 119.0846 | 119.0855 | 8.18      |   | 13.3      |
| 133.0872 | 133.0859 | -9.74     |   | 25.46     |
| 144.0754 | 144.0768 | 9.16      |   | 16.49     |
| 147.0659 | 147.0652 | -4.73     |   | 95.47     |
| 149.134  | 149.1325 | -10.19    |   | 14.04     |
| 283.2641 | 283.2632 | -3.48     |   | 16.26     |
| 309.2783 | 309.2788 | 1.51      |   | 43.46     |
| 310.2792 | 310.2741 | -16.6     |   | 21.13     |
| 311.2909 | 311.2931 | 7.08      |   | 21.74     |
| 443.3351 | 443.3354 | 0.68      | 1 | 346486.06 |

| Compound Label                                                        | m/z      | RT     | Algorithm  | Mass     |
|-----------------------------------------------------------------------|----------|--------|------------|----------|
| Cpd 35: C <sub>25</sub> H <sub>48</sub> N <sub>3</sub> O <sub>6</sub> | 487.3625 | 13.361 | Auto MS/MS | 486.3551 |

Compound Chromatograms

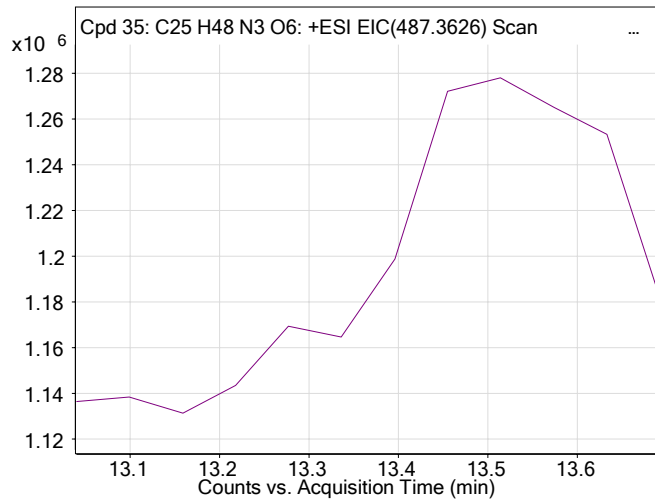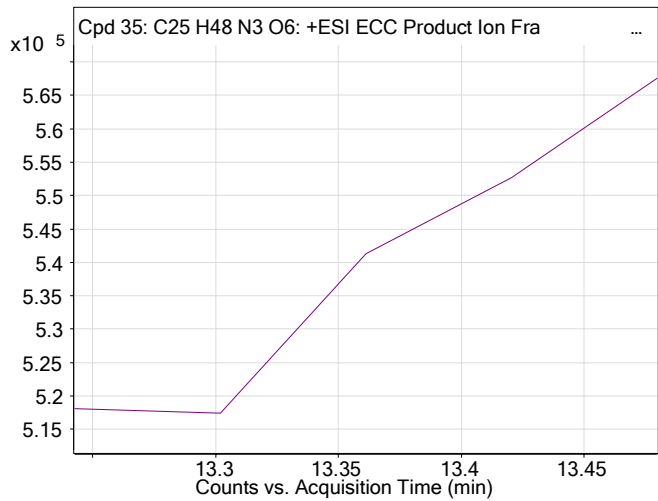

MS Spectrum

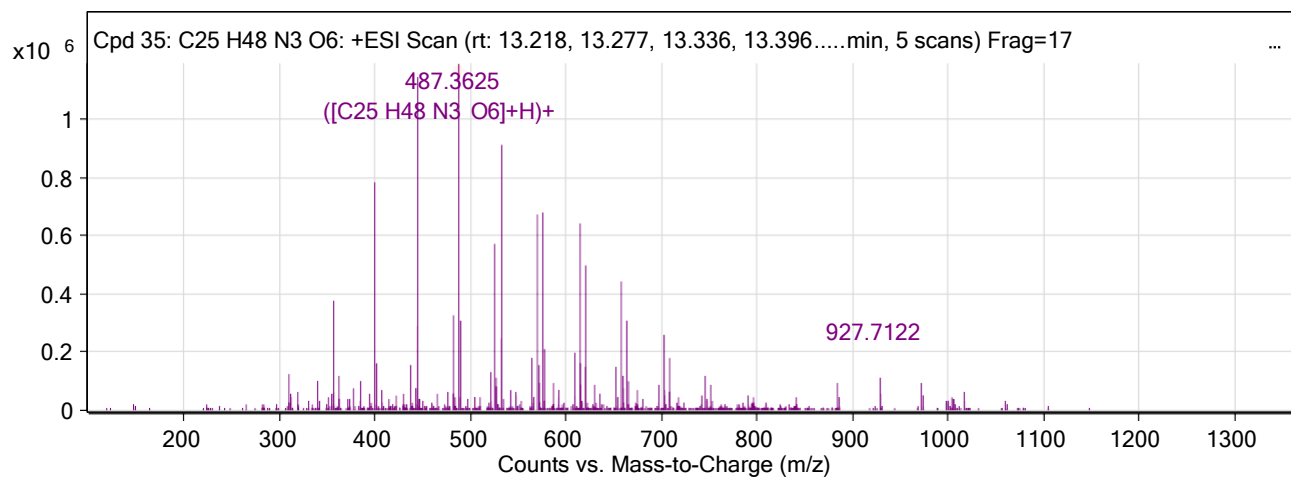

MS Zoomed Spectrum

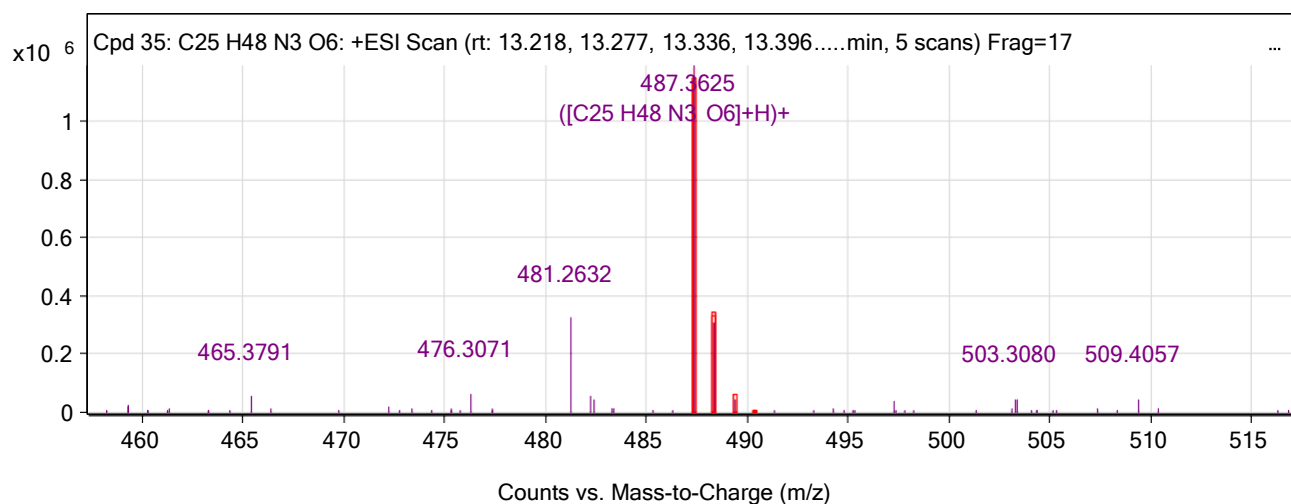

MS Spectrum Peak List

| m/z      | Calc m/z | Diff(ppm) | z | Abund      | Formula                                                       | Ion                |
|----------|----------|-----------|---|------------|---------------------------------------------------------------|--------------------|
| 399.3097 |          |           | 1 | 782131.13  |                                                               |                    |
| 443.3361 |          |           | 1 | 1142530.63 |                                                               |                    |
| 487.3625 | 487.3616 | -1.9      | 1 | 1189659.5  | C <sub>25</sub> H <sub>48</sub> N <sub>3</sub> O <sub>6</sub> | (M+H) <sup>+</sup> |
| 488.3652 | 488.3648 | -0.98     | 1 | 305906.44  | C <sub>25</sub> H <sub>48</sub> N <sub>3</sub> O <sub>6</sub> | (M+H) <sup>+</sup> |
| 489.3671 | 489.3674 | 0.69      | 1 | 42169.64   | C <sub>25</sub> H <sub>48</sub> N <sub>3</sub> O <sub>6</sub> | (M+H) <sup>+</sup> |
| 490.369  | 490.3701 | 2.25      | 1 | 5428.17    | C <sub>25</sub> H <sub>48</sub> N <sub>3</sub> O <sub>6</sub> | (M+H) <sup>+</sup> |
| 531.3892 |          |           | 1 | 906770     |                                                               |                    |
| 569.3165 |          |           | 1 | 668747.06  |                                                               |                    |
| 575.4153 |          |           | 1 | 672120.31  |                                                               |                    |
| 613.3425 |          |           | 1 | 638120.19  |                                                               |                    |

MSMS Spectrum

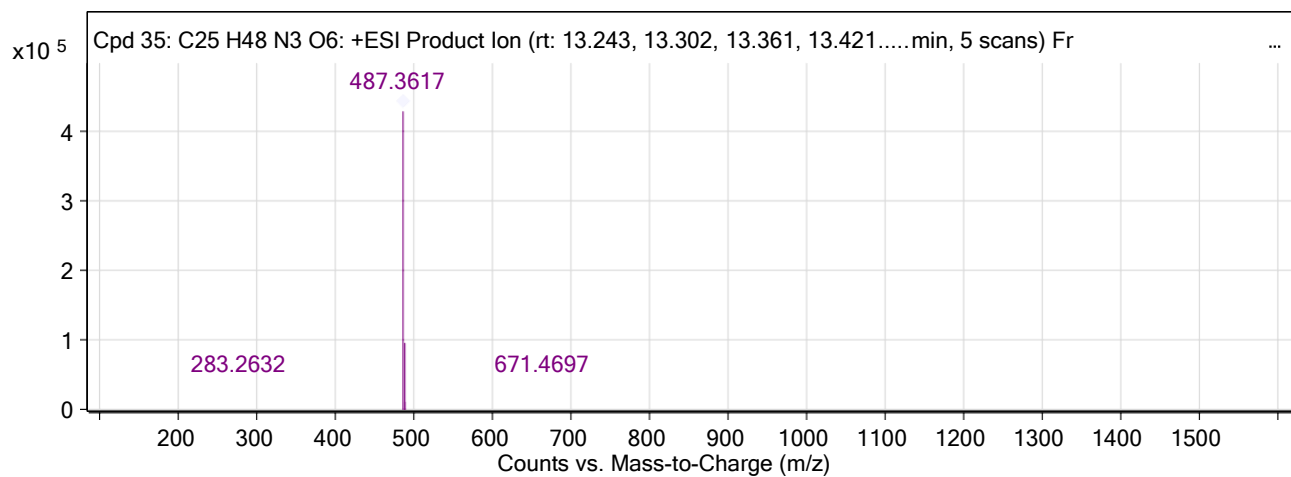

**MS/MS Spectrum Peak List**

| m/z      | Calc m/z | Diff(ppm) | z | Abund     |
|----------|----------|-----------|---|-----------|
| 283.2632 | 283.2632 | -0.26     | 1 | 175.99    |
| 309.2785 | 309.2788 | 0.94      |   | 39.53     |
| 486.3351 |          |           | 2 | 590.86    |
| 486.6622 |          |           | 2 | 253.58    |
| 486.8297 |          |           | 2 | 452.98    |
| 487.3617 | 487.3616 | -0.14     | 1 | 427468.41 |
| 488.3643 |          |           | 1 | 94058.11  |
| 489.318  |          |           | 2 | 436.91    |
| 489.3663 |          |           | 1 | 10103.49  |
| 490.3684 |          |           | 1 | 235.34    |

| Compound Label        | m/z      | RT     | Algorithm  | Mass     |
|-----------------------|----------|--------|------------|----------|
| Cpd 36: C23 H44 N3 O5 | 443.3361 | 13.378 | Auto MS/MS | 442.3288 |

**Compound Chromatograms**

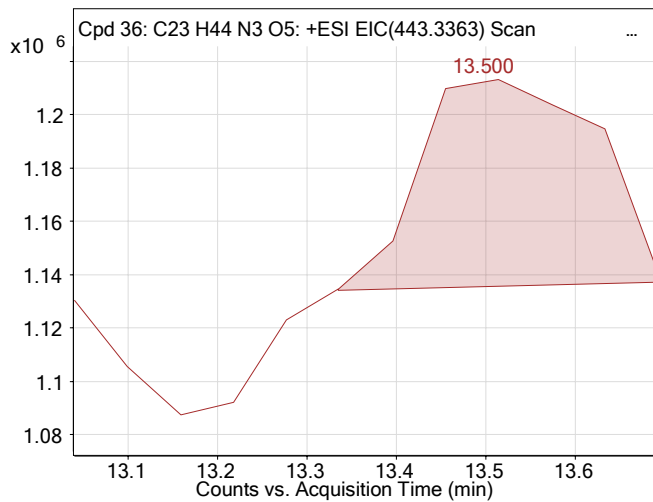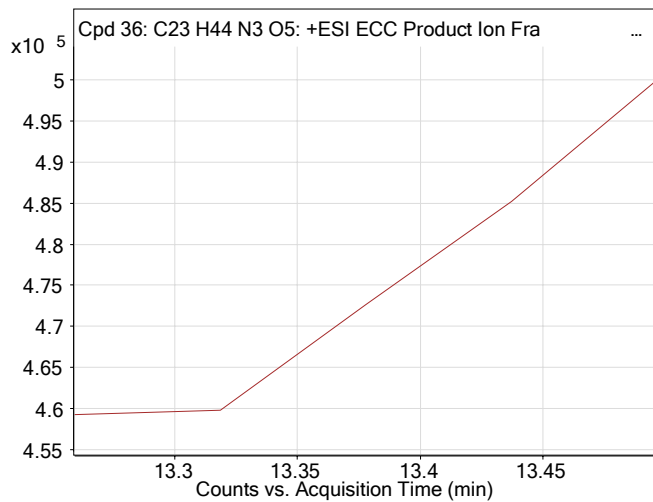

**MS Spectrum**

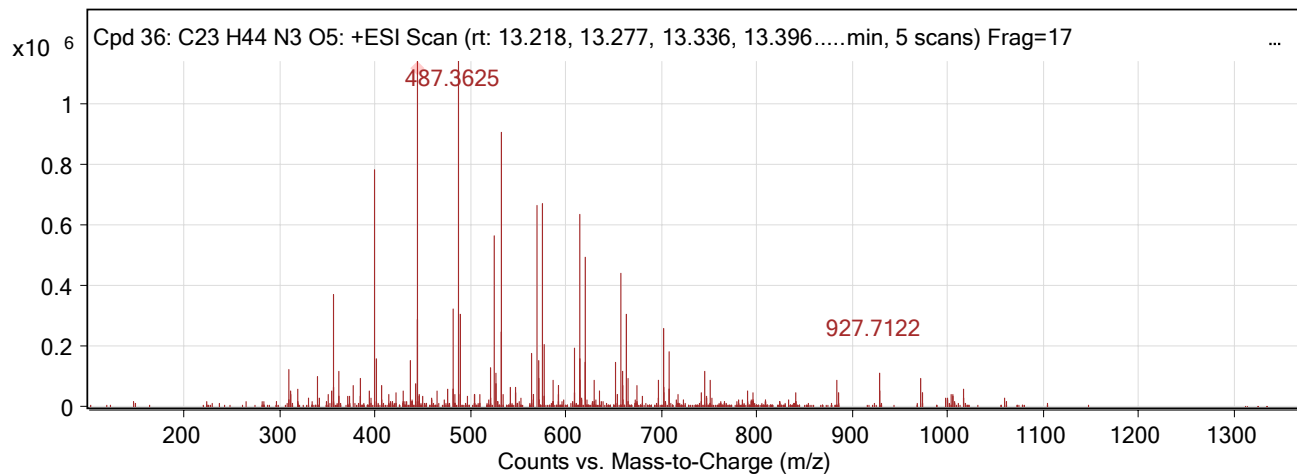

**MS Zoomed Spectrum**

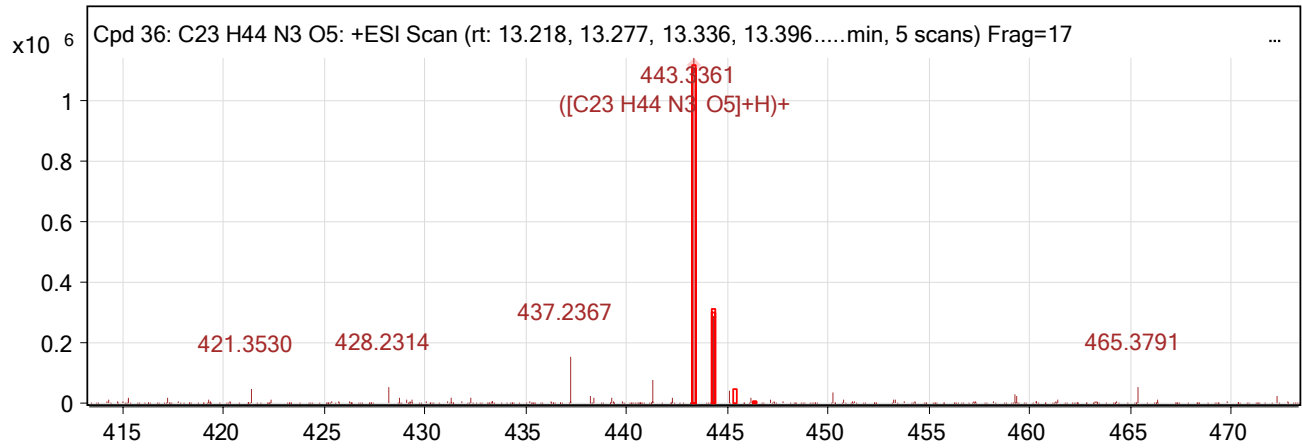

**MS Spectrum Peak List**

| m/z      | Calc m/z | Diff(ppm) | z | Abund      | Formula                                                       | Ion                |
|----------|----------|-----------|---|------------|---------------------------------------------------------------|--------------------|
| 399.3097 |          |           | 1 | 782131.13  |                                                               |                    |
| 443.3361 | 443.3354 | -1.75     | 1 | 1142530.63 | C <sub>23</sub> H <sub>44</sub> N <sub>3</sub> O <sub>5</sub> | (M+H) <sup>+</sup> |
| 444.3389 | 444.3385 | -0.92     | 1 | 288213.31  | C <sub>23</sub> H <sub>44</sub> N <sub>3</sub> O <sub>5</sub> | (M+H) <sup>+</sup> |
| 445.3408 | 445.3412 | 0.93      | 1 | 35657.84   | C <sub>23</sub> H <sub>44</sub> N <sub>3</sub> O <sub>5</sub> | (M+H) <sup>+</sup> |
| 446.3433 | 446.3438 | 1.12      | 1 | 4242.09    | C <sub>23</sub> H <sub>44</sub> N <sub>3</sub> O <sub>5</sub> | (M+H) <sup>+</sup> |
| 487.3625 |          |           | 1 | 1189659.5  |                                                               |                    |
| 531.3892 |          |           | 1 | 906770     |                                                               |                    |
| 569.3165 |          |           | 1 | 668747.06  |                                                               |                    |
| 575.4153 |          |           | 1 | 672120.31  |                                                               |                    |
| 613.3425 |          |           | 1 | 638120.19  |                                                               |                    |

MSMS Spectrum

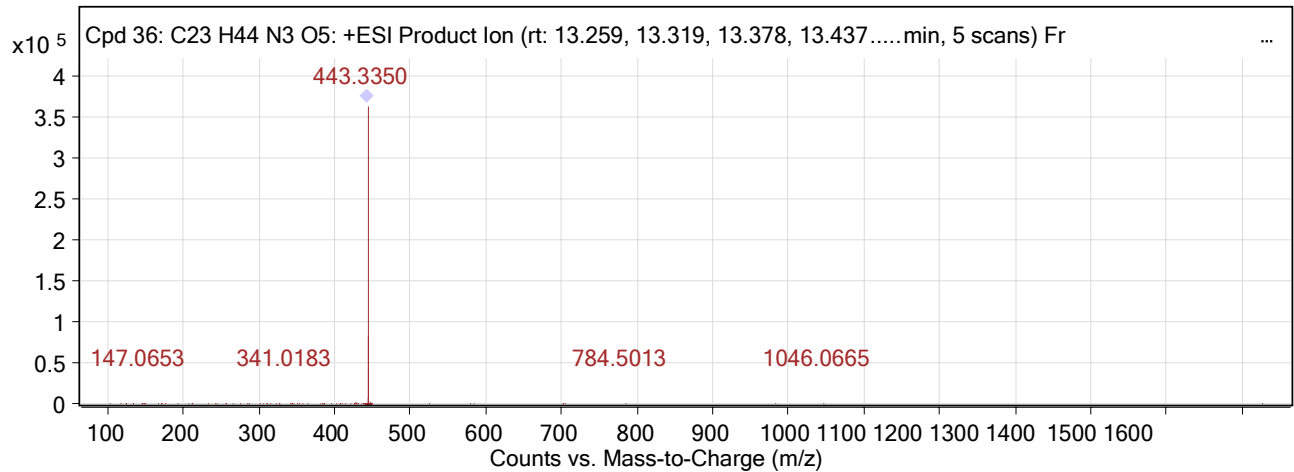

**MS/MS Spectrum Peak List**

| m/z      | Calc m/z | Diff(ppm)  | z | Abund     |
|----------|----------|------------|---|-----------|
| 117.0922 | 117.091  | -10.55     |   | 19.8      |
| 123.1146 | 123.1168 | 18.18      |   | 13.42     |
| 133.0853 | 133.0859 | 4.64       |   | 25.66     |
| 147.0653 | 147.0652 | -0.73      | 1 | 94.13     |
| 166.0907 | 166.0948 | 24.72      |   | 24.32     |
| 210.1178 | 210.121  | 15.2       |   | 15.02     |
| 265.2485 | 265.2512 | 10.54      |   | 18.91     |
| 309.2781 | 309.2775 | -1.94      | 1 | 49.19     |
| 441.3276 | 220.6596 | -500009.52 | 2 | 18.2      |
| 443.335  | 443.3354 | 0.74       | 1 | 364348.72 |

| Compound Label                                                        | m/z      | RT     | Algorithm  | Mass     |
|-----------------------------------------------------------------------|----------|--------|------------|----------|
| Cpd 37: C <sub>25</sub> H <sub>48</sub> N <sub>3</sub> O <sub>6</sub> | 487.3626 | 13.658 | Auto MS/MS | 486.3552 |

Compound Chromatograms



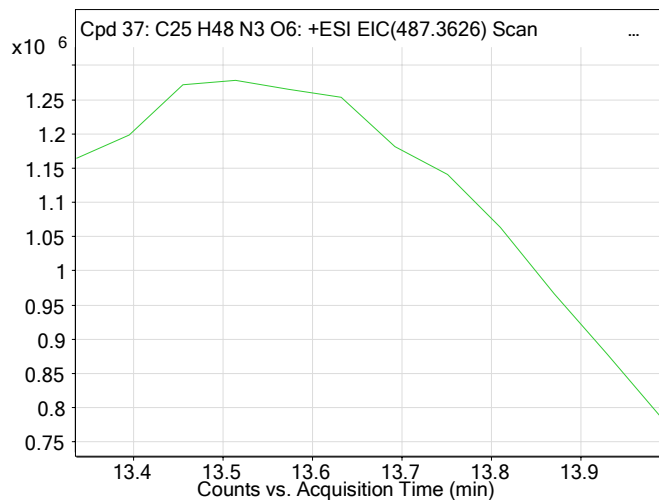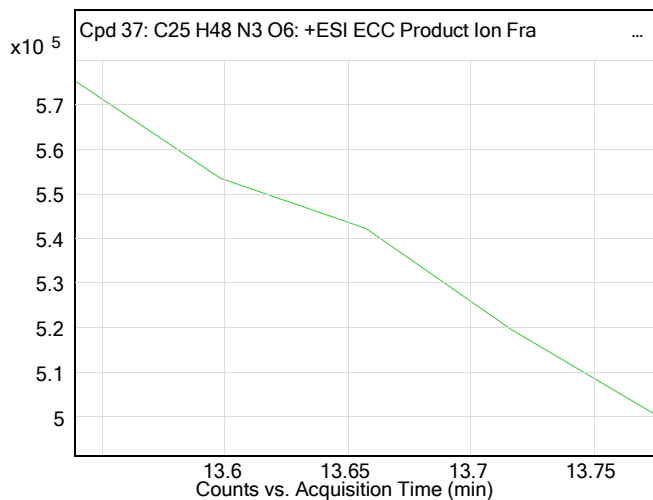

MS Spectrum

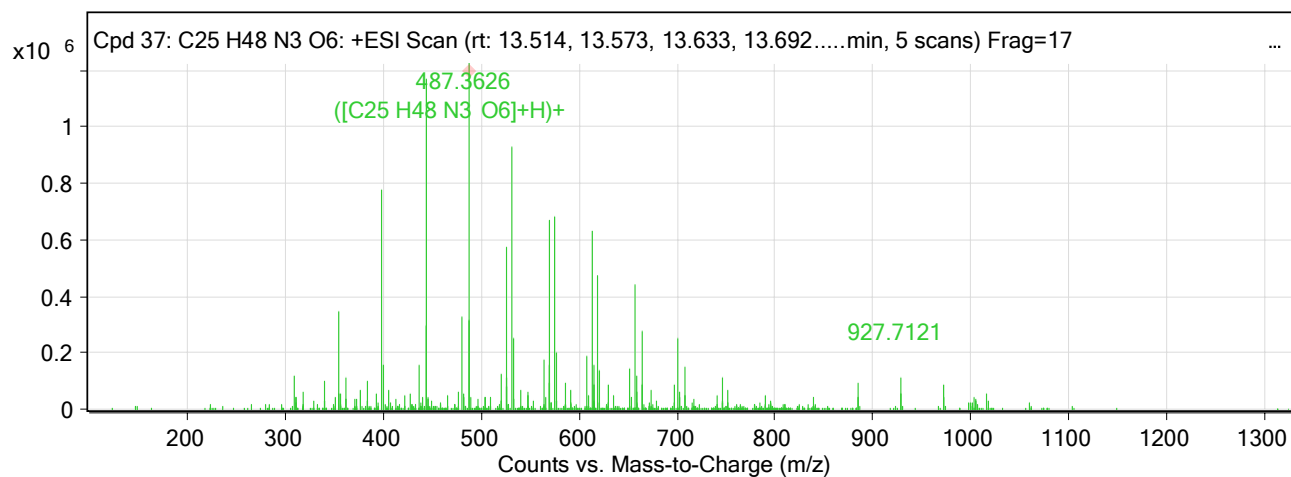

MS Zoomed Spectrum

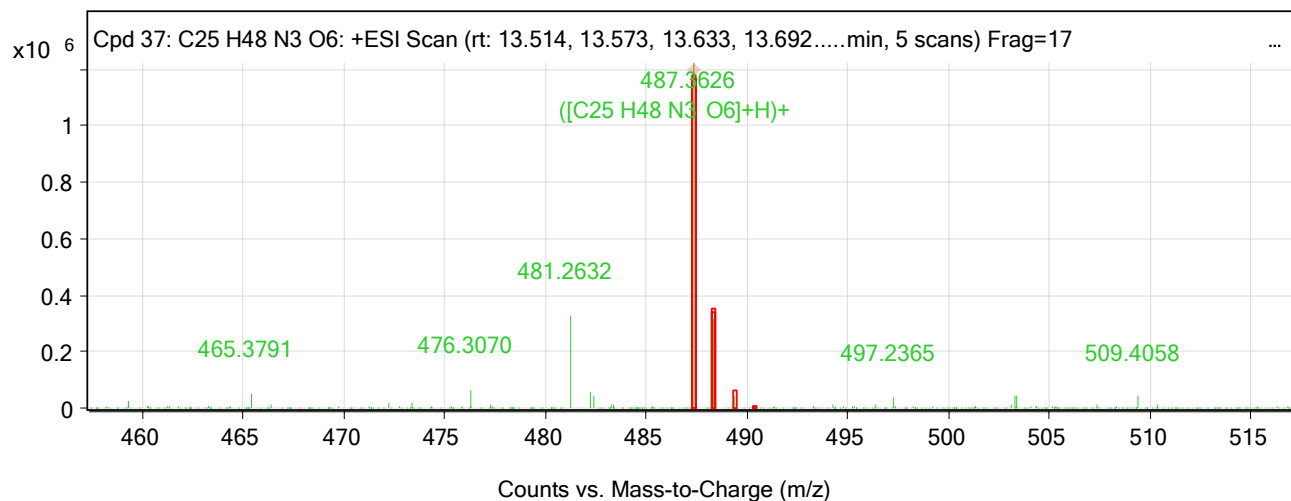

MS Spectrum Peak List

| m/z      | Calc m/z | Diff(ppm) | z | Abund     | Formula       | Ion    |
|----------|----------|-----------|---|-----------|---------------|--------|
| 399.3097 |          |           | 1 | 774213.13 |               |        |
| 443.3361 |          |           | 1 | 1166519.5 |               |        |
| 487.3626 | 487.3616 | -2.07     | 1 | 1223579   | C25 H48 N3 O6 | (M+H)+ |
| 488.3652 | 488.3648 | -0.89     | 1 | 316374.06 | C25 H48 N3 O6 | (M+H)+ |
| 489.3671 | 489.3674 | 0.65      | 1 | 43932.23  | C25 H48 N3 O6 | (M+H)+ |
| 490.3691 | 490.3701 | 1.96      | 1 | 5392.98   | C25 H48 N3 O6 | (M+H)+ |
| 531.3892 |          |           | 1 | 924618.5  |               |        |
| 569.3165 |          |           | 1 | 671237.88 |               |        |

MSMS Spectrum

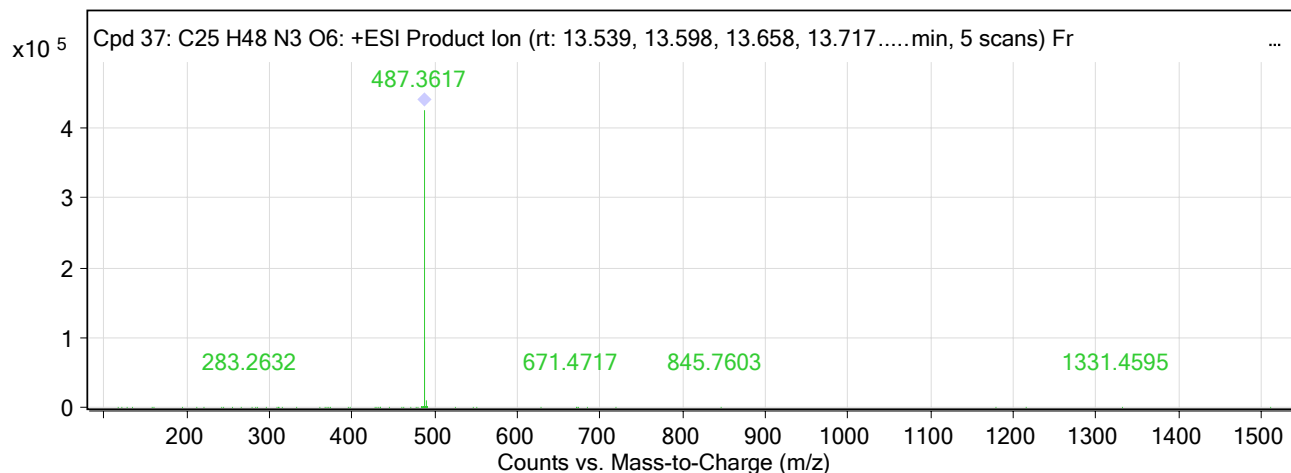

MS/MS Spectrum PeakList

| m/z      | Calc m/z | Diff(ppm) | z | Abund     |
|----------|----------|-----------|---|-----------|
| 283.2632 | 283.2632 | 0         | 1 | 188.25    |
| 309.2782 | 309.2788 | 1.98      | 1 | 57.01     |
| 486.3308 |          |           | 2 | 470.54    |
| 486.6625 |          |           | 1 | 309.01    |
| 486.8312 |          |           | 2 | 272.45    |
| 487.3617 | 487.3616 | -0.2      | 1 | 426764.44 |
| 488.3644 |          |           | 1 | 93937.3   |
| 489.3198 |          |           | 2 | 519.56    |
| 489.3663 |          |           | 1 | 10124.01  |
| 490.3689 |          |           | 1 | 250.39    |

| Compound Label                                                        | m/z      | RT     | Algorithm  | Mass     |
|-----------------------------------------------------------------------|----------|--------|------------|----------|
| Cpd 38: C <sub>23</sub> H <sub>44</sub> N <sub>3</sub> O <sub>5</sub> | 443.3361 | 13.674 | Auto MS/MS | 442.3288 |

Compound Chromatograms

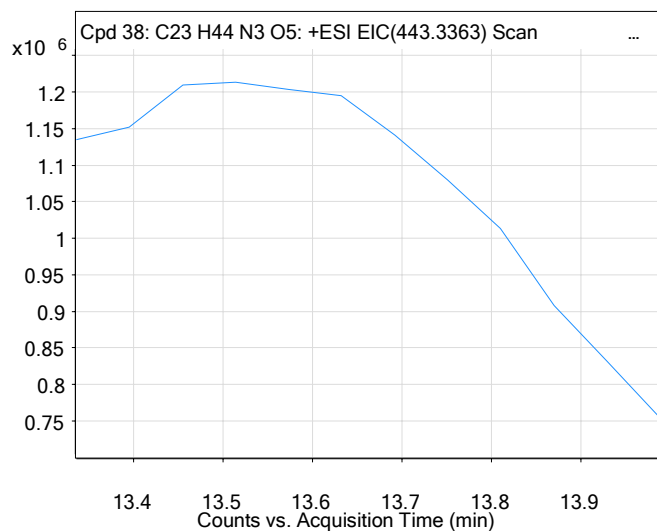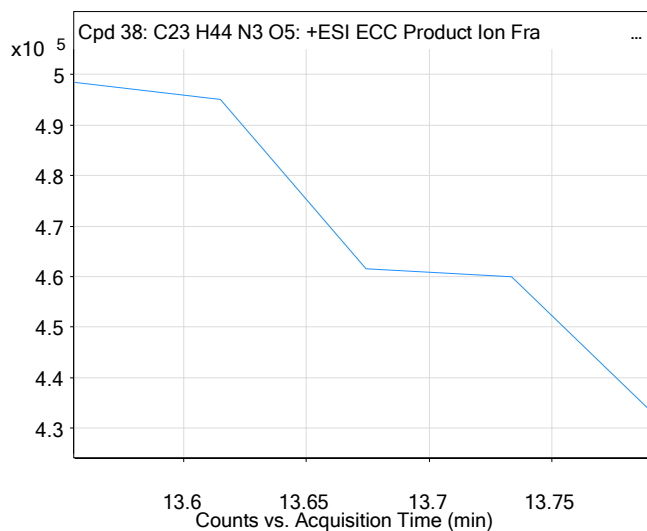

MS Spectrum

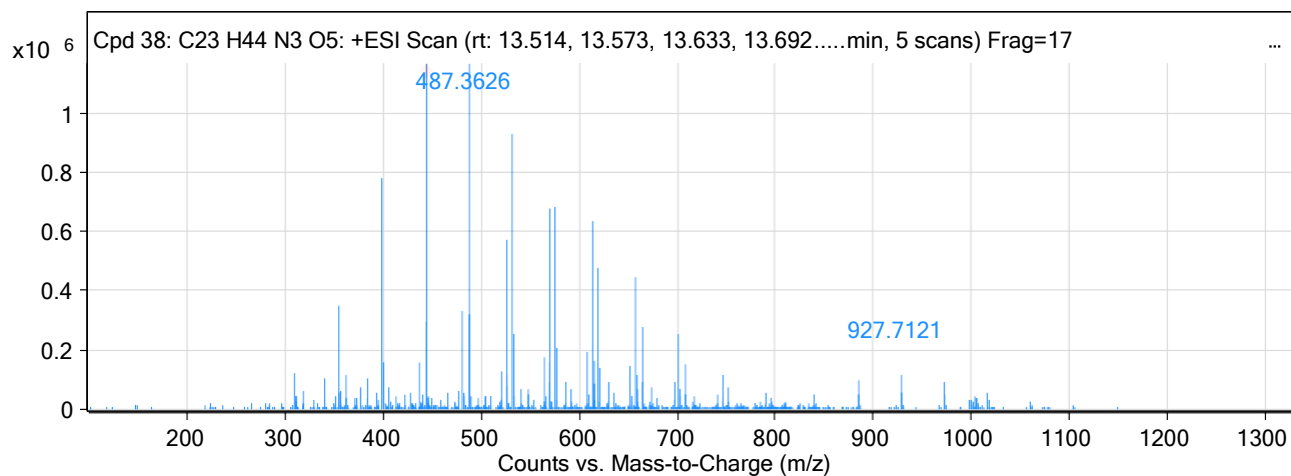

MS Zoomed Spectrum

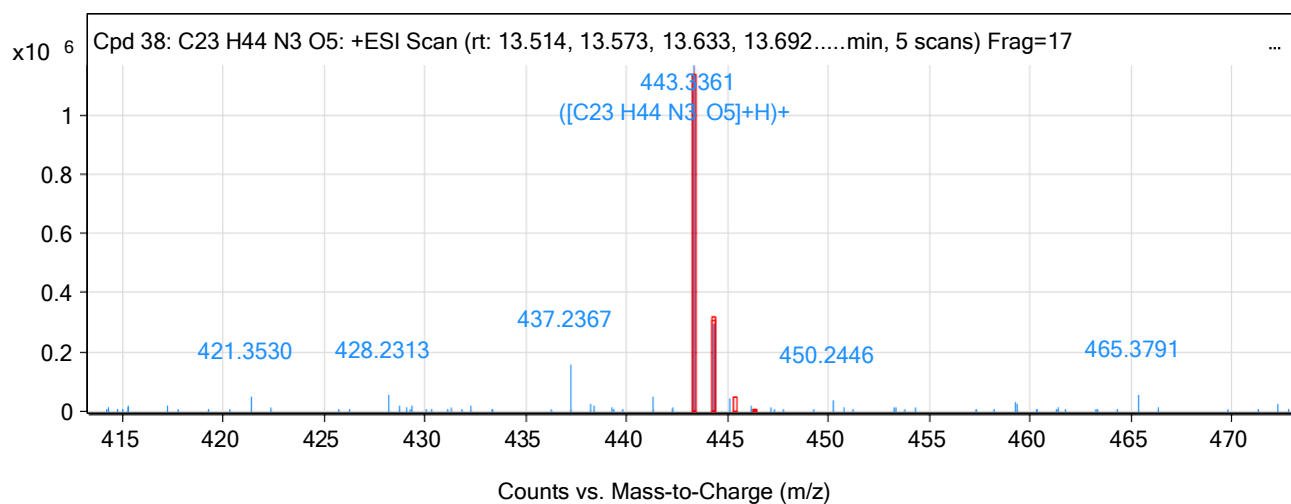

MS Spectrum Peak List

| m/z      | Calc m/z | Diff(ppm) | z | Abund     | Formula                                                       | Ion                |
|----------|----------|-----------|---|-----------|---------------------------------------------------------------|--------------------|
| 399.3097 |          |           | 1 | 774213.13 |                                                               |                    |
| 443.3361 | 443.3354 | -1.7      | 1 | 1166519.5 | C <sub>23</sub> H <sub>44</sub> N <sub>3</sub> O <sub>5</sub> | (M+H) <sup>+</sup> |
| 444.339  | 444.3385 | -0.95     | 1 | 293871.81 | C <sub>23</sub> H <sub>44</sub> N <sub>3</sub> O <sub>5</sub> | (M+H) <sup>+</sup> |
| 445.3408 | 445.3412 | 0.99      | 1 | 36007.16  | C <sub>23</sub> H <sub>44</sub> N <sub>3</sub> O <sub>5</sub> | (M+H) <sup>+</sup> |
| 446.343  | 446.3438 | 1.91      | 1 | 4085.85   | C <sub>23</sub> H <sub>44</sub> N <sub>3</sub> O <sub>5</sub> | (M+H) <sup>+</sup> |
| 487.3626 |          |           | 1 | 1223579   |                                                               |                    |
| 531.3892 |          |           | 1 | 924618.5  |                                                               |                    |
| 569.3165 |          |           | 1 | 671237.88 |                                                               |                    |
| 575.4151 |          |           | 1 | 679030.13 |                                                               |                    |
| 613.3426 |          |           | 1 | 631652.81 |                                                               |                    |

MSMS Spectrum

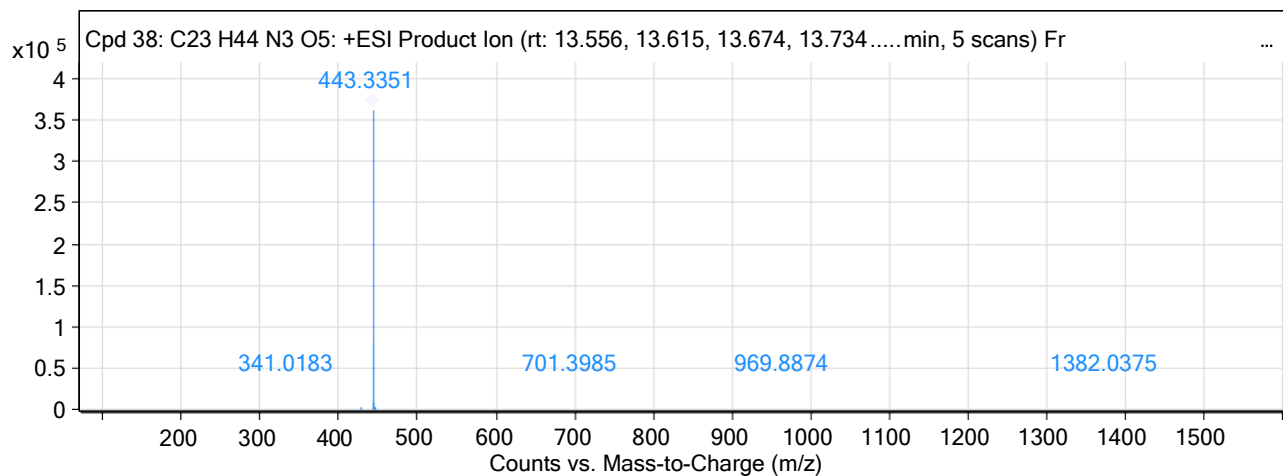

**MS/MS Spectrum Peak List**

| m/z      | Calc m/z | Diff(ppm) | z | Abund     |
|----------|----------|-----------|---|-----------|
| 133.0861 | 133.0859 | -1.67     |   | 38.68     |
| 136.1194 | 136.1247 | 38.56     |   | 11.27     |
| 147.0656 | 147.0652 | -3.03     | 1 | 128.64    |
| 149.045  | 149.0444 | -3.72     |   | 14.72     |
| 174.1295 | 174.125  | -25.79    |   | 13.21     |
| 217.1249 | 217.1309 | 27.49     |   | 12.8      |
| 283.2631 | 283.2632 | 0.21      |   | 12.24     |
| 303.2323 | 303.2278 | -14.57    |   | 17.06     |
| 309.2794 | 309.2788 | -1.88     |   | 77.3      |
| 443.3351 | 443.3354 | 0.64      | 1 | 361483.03 |

| Compound Label     | m/z      | RT     | Algorithm  | Mass     |
|--------------------|----------|--------|------------|----------|
| Cpd 39: C25 H46 O6 | 443.3366 | 13.941 | Auto MS/MS | 442.3291 |

**Compound Chromatograms**

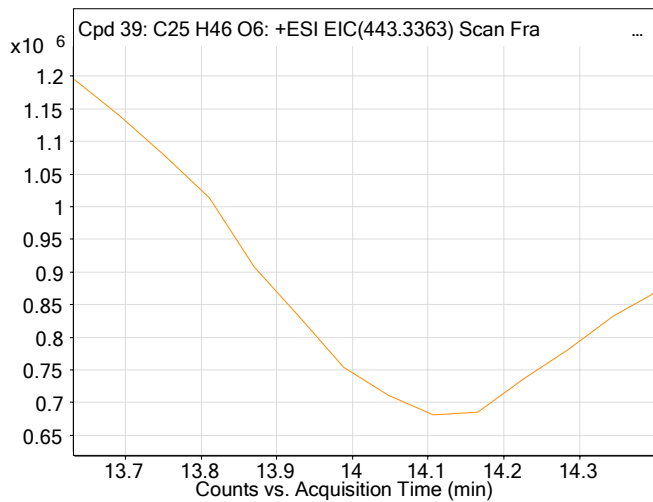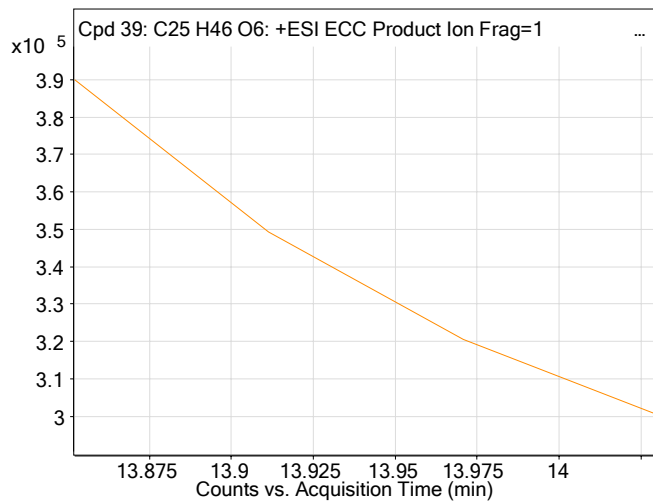

**MS Spectrum**

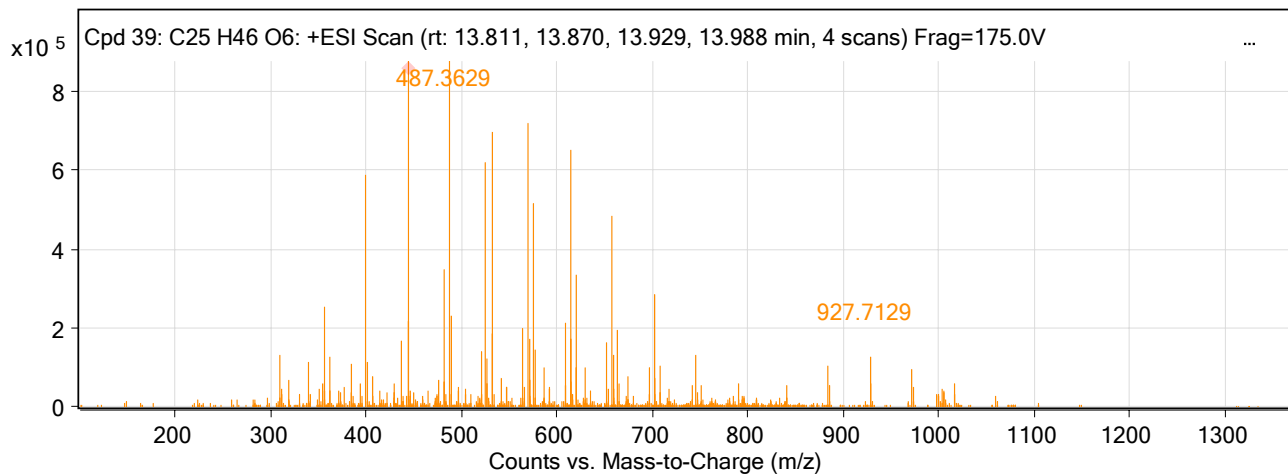

**MS Zoomed Spectrum**

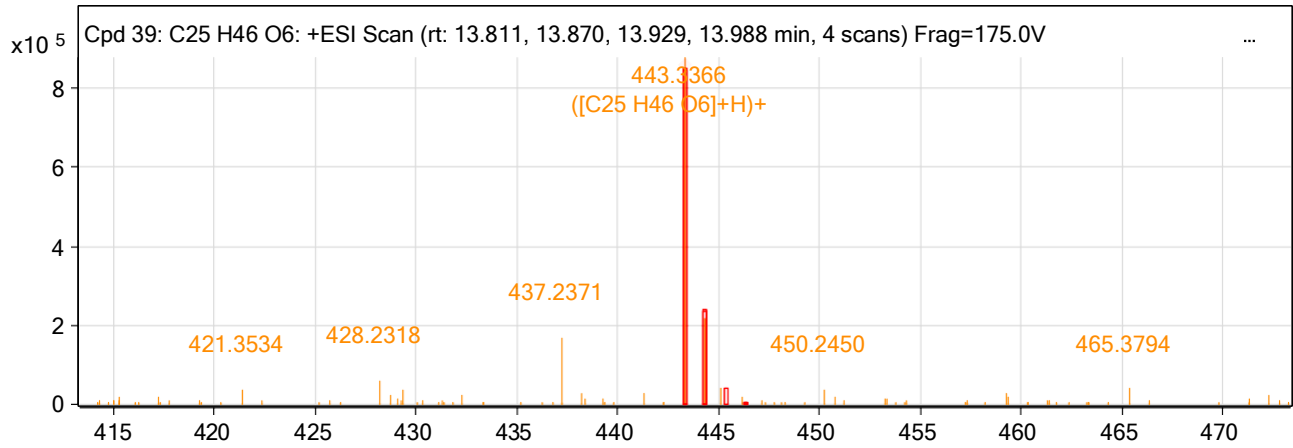

Counts vs. Mass-to-Charge (m/z)

MS Spectrum Peak List

| m/z      | Calc m/z | Diff(ppm) | z | Abund     | Formula                                        | Ion                |
|----------|----------|-----------|---|-----------|------------------------------------------------|--------------------|
| 399.3099 |          |           | 1 | 587368.25 |                                                |                    |
| 443.3366 | 443.3367 | 0.18      | 1 | 877284.44 | C <sub>25</sub> H <sub>46</sub> O <sub>6</sub> | (M+H) <sup>+</sup> |
| 444.3392 | 444.3401 | 2.07      | 1 | 218162.89 | C <sub>25</sub> H <sub>46</sub> O <sub>6</sub> | (M+H) <sup>+</sup> |
| 445.3409 | 445.3429 | 4.42      | 1 | 27472.2   | C <sub>25</sub> H <sub>46</sub> O <sub>6</sub> | (M+H) <sup>+</sup> |
| 446.3435 | 446.3456 | 4.84      | 1 | 3194.58   | C <sub>25</sub> H <sub>46</sub> O <sub>6</sub> | (M+H) <sup>+</sup> |
| 487.3629 |          |           | 1 | 924325.81 |                                                |                    |
| 525.2902 |          |           | 1 | 618520.19 |                                                |                    |
| 531.3891 |          |           | 1 | 695860.69 |                                                |                    |
| 569.317  |          |           | 1 | 718938.38 |                                                |                    |
| 613.3435 |          |           | 1 | 651222.81 |                                                |                    |

MSMS Spectrum

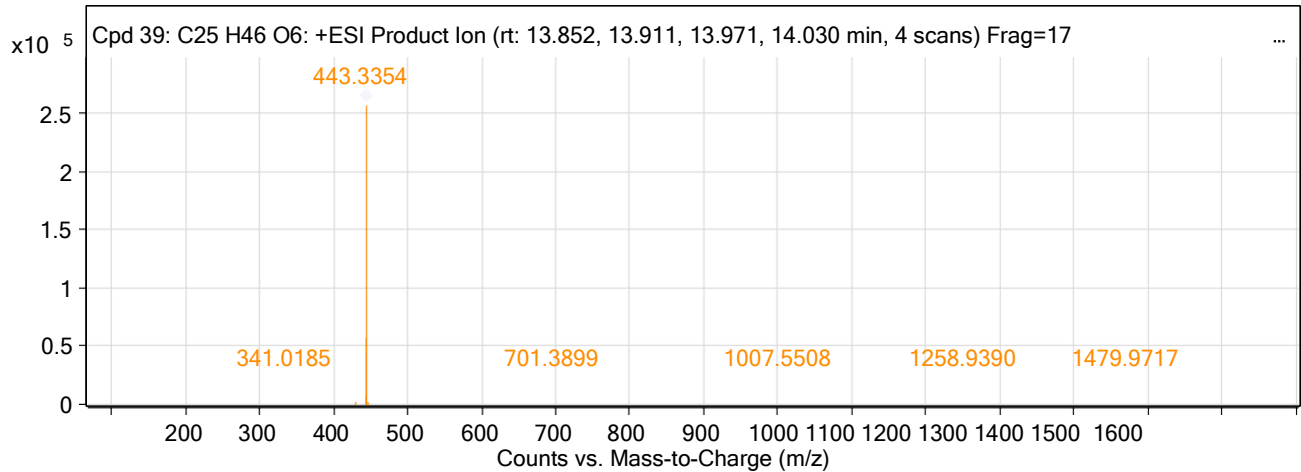

MS/MS Spectrum Peak List

| m/z      | Calc m/z | Diff(ppm) | z | Abund     |
|----------|----------|-----------|---|-----------|
| 133.0836 | 133.0859 | 17.4      |   | 15.88     |
| 144.076  | 144.0781 | 14.82     |   | 17.04     |
| 147.0664 | 147.0652 | -7.93     |   | 89.39     |
| 225.1453 | 225.1485 | 14.11     |   | 10.11     |
| 271.1508 | 271.154  | 11.98     |   | 13.96     |
| 295.2316 | 295.2268 | -16.25    |   | 10.82     |
| 309.2781 | 309.2788 | 2.25      |   | 84.31     |
| 364.3331 | 364.3336 | 1.37      |   | 11.65     |
| 426.2975 | 426.2976 | 0.1       |   | 10.02     |
| 443.3354 | 443.3367 | 3.05      | 1 | 256734.39 |

| Compound Label                                                        | m/z      | RT     | Algorithm  | Mass     |
|-----------------------------------------------------------------------|----------|--------|------------|----------|
| Cpd 40: C <sub>25</sub> H <sub>48</sub> N <sub>3</sub> O <sub>6</sub> | 487.3628 | 13.954 | Auto MS/MS | 486.3553 |

Compound Chromatograms

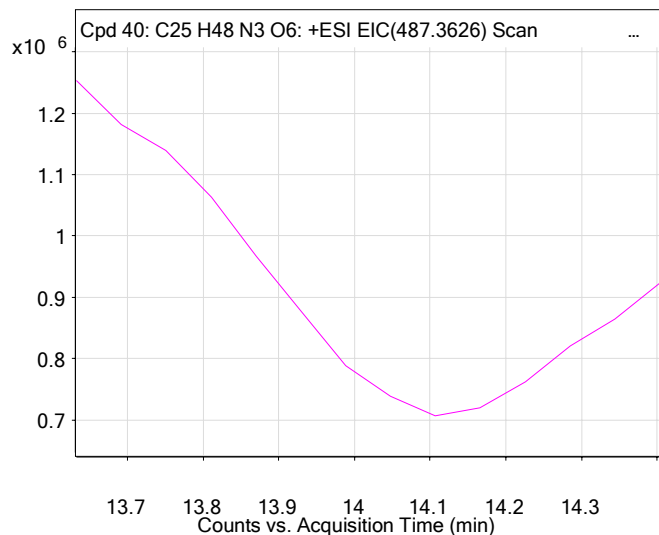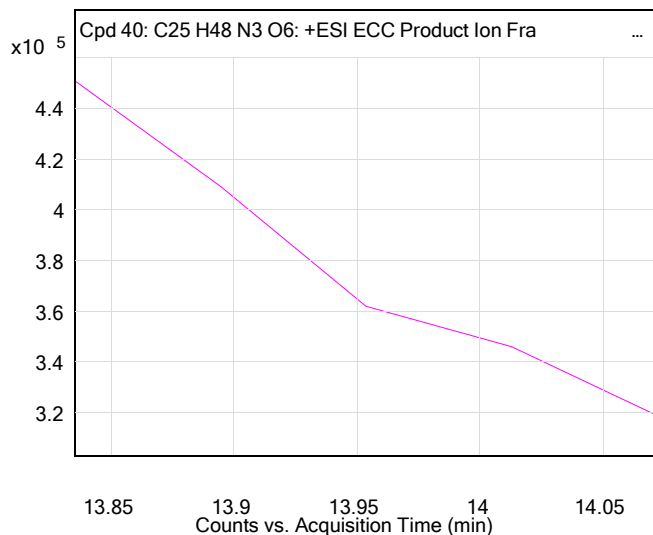

MS Spectrum

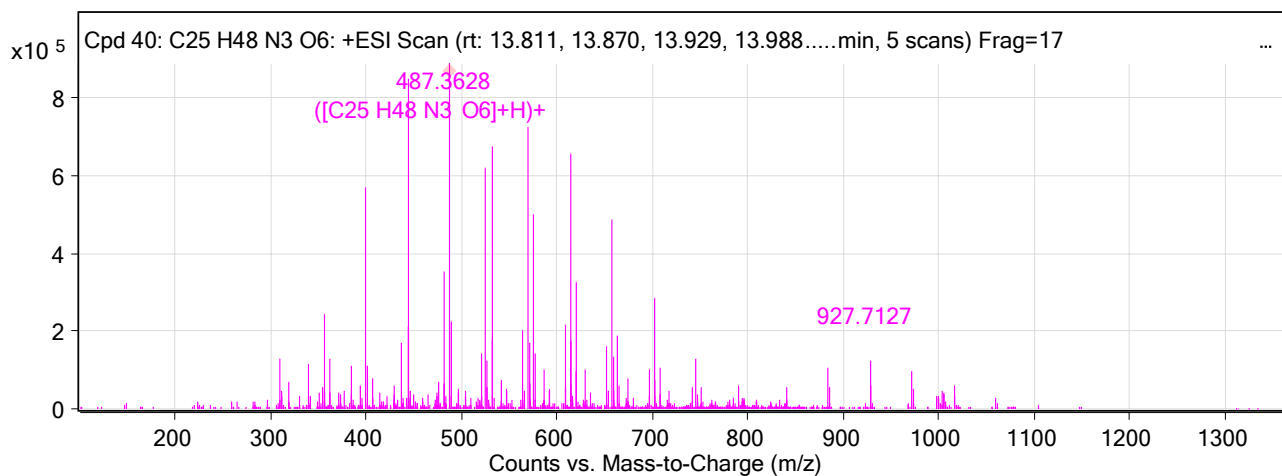

MS Zoomed Spectrum

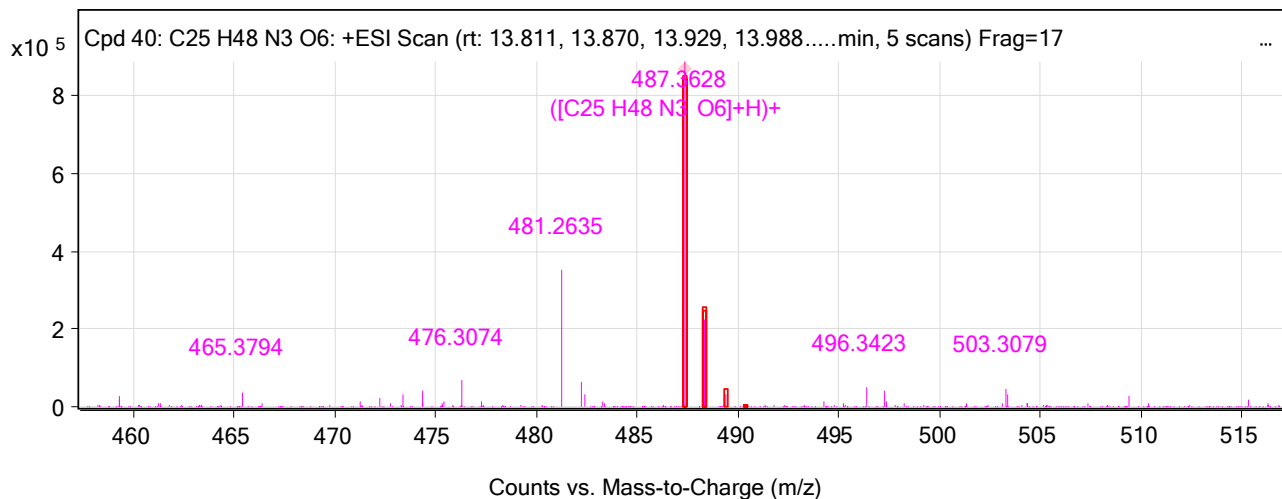

MS Spectrum Peak List

| m/z      | Calc m/z | Diff(ppm) | z | Abund     | Formula       | Ion    |
|----------|----------|-----------|---|-----------|---------------|--------|
| 399.3098 |          |           | 1 | 569323.06 |               |        |
| 443.3365 |          |           | 1 | 844094.88 |               |        |
| 487.3628 | 487.3616 | -2.4      | 1 | 887258.63 | C25 H48 N3 O6 | (M+H)+ |
| 488.3654 | 488.3648 | -1.27     | 1 | 222670.92 | C25 H48 N3 O6 | (M+H)+ |
| 489.3674 | 489.3674 | 0.14      | 1 | 32047.56  | C25 H48 N3 O6 | (M+H)+ |
| 490.3692 | 490.3701 | 1.82      | 1 | 4049.34   | C25 H48 N3 O6 | (M+H)+ |
| 525.2901 |          |           | 1 | 619103.69 |               |        |

MSMS Spectrum

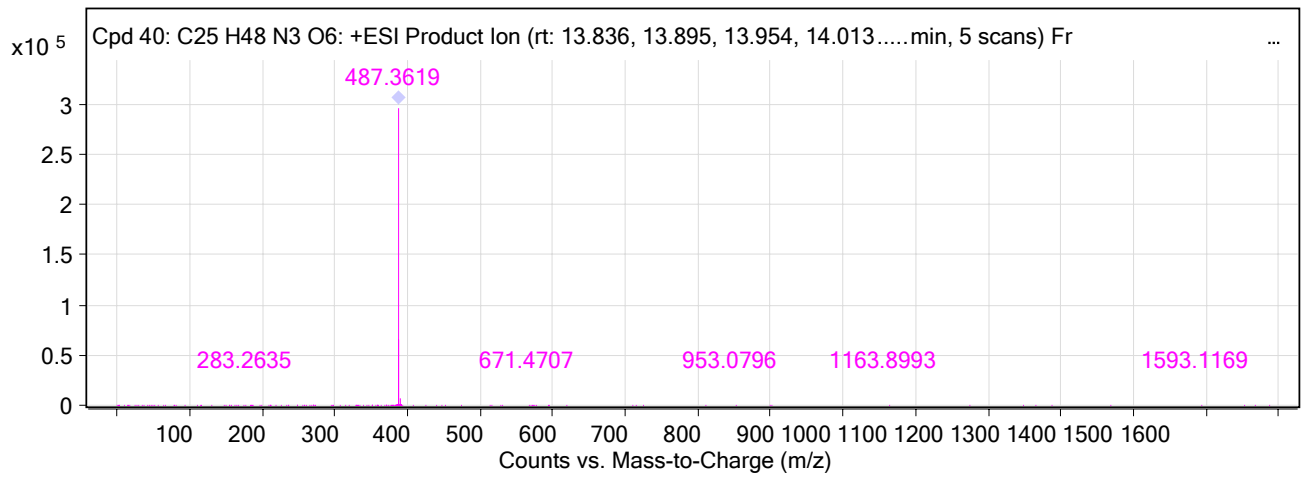

MS/MS Spectrum PeakList

| m/z      | Calc m/z | Diff(ppm) | z | Abund     |
|----------|----------|-----------|---|-----------|
| 133.0852 | 133.0846 | -4.44     |   | 22.73     |
| 144.0776 | 144.0781 | 3.61      |   | 17.17     |
| 247.2408 | 247.242  | 5.11      |   | 14.65     |
| 276.1548 | 276.1554 | 2.34      |   | 15.49     |
| 283.2635 | 283.2632 | -1.12     | 1 | 195.22    |
| 298.171  | 298.1761 | 17.15     |   | 18.4      |
| 309.2793 | 309.2788 | -1.45     | 1 | 43.35     |
| 325.2181 | 325.2207 | 8.02      |   | 16.12     |
| 470.3335 | 470.335  | 3.36      |   | 16.26     |
| 487.3619 | 487.3616 | -0.7      | 1 | 296290.84 |

| Compound Label                                                         | m/z      | RT     | Algorithm  | Mass     |
|------------------------------------------------------------------------|----------|--------|------------|----------|
| Cpd 41: C <sub>24</sub> H <sub>46</sub> N <sub>3</sub> O <sub>12</sub> | 569.3166 | 14.149 | Auto MS/MS | 568.3092 |

Compound Chromatograms

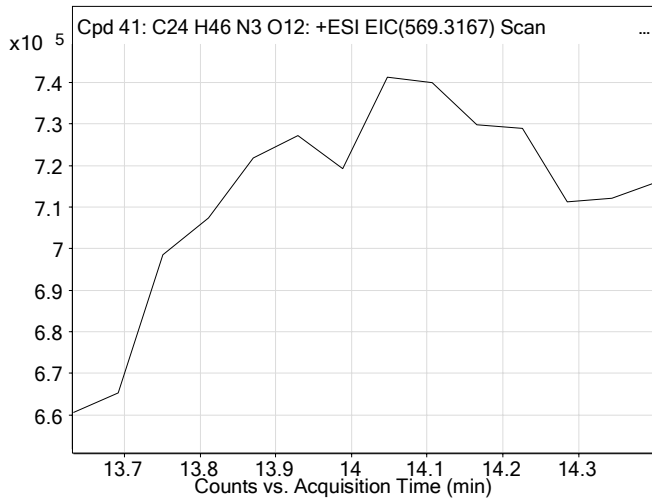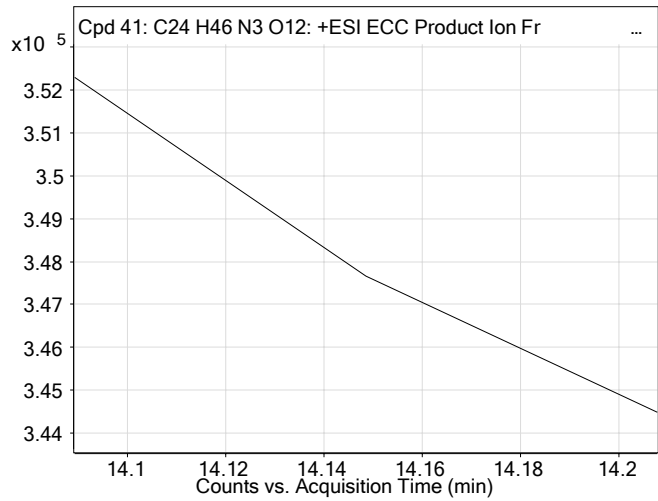

MS Spectrum

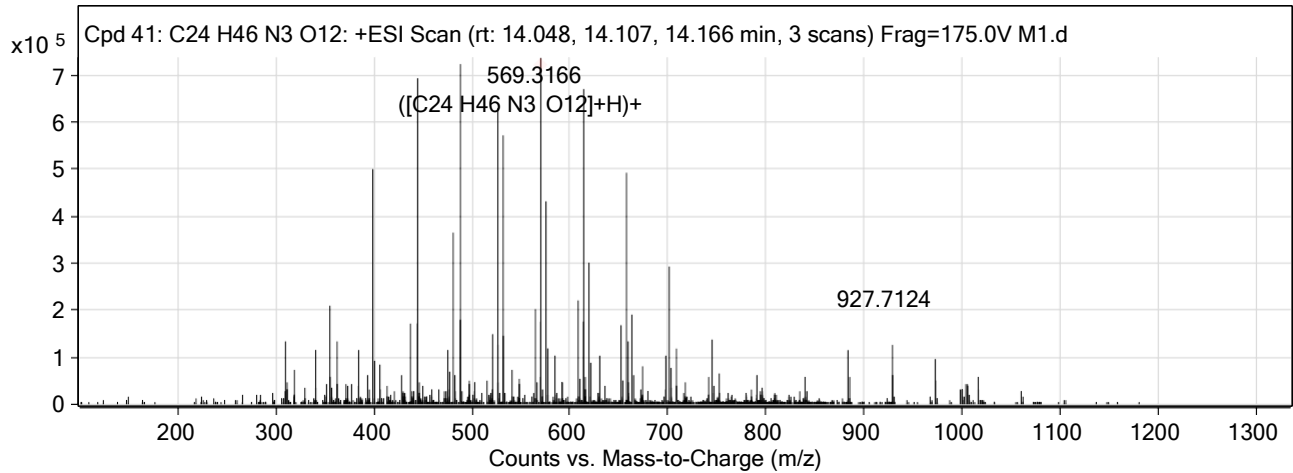

MS Zoomed Spectrum

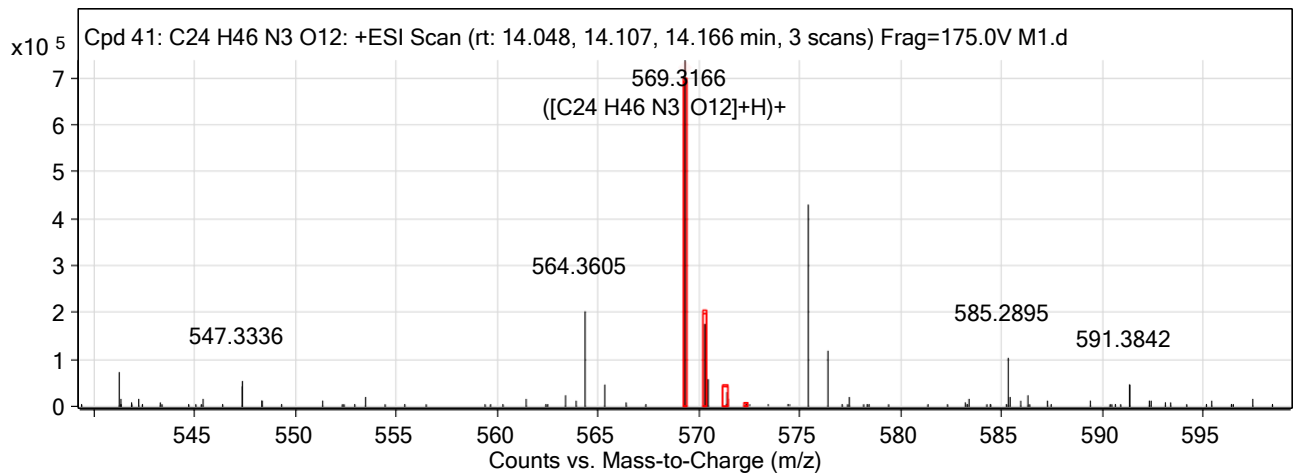

MS Spectrum Peak List

| m/z      | Calc m/z | Diff(ppm) | z | Abund     | Formula                                                        | Ion                |
|----------|----------|-----------|---|-----------|----------------------------------------------------------------|--------------------|
| 399.3095 |          |           | 1 | 496558.59 |                                                                |                    |
| 443.3363 |          |           | 1 | 692726.75 |                                                                |                    |
| 487.3625 |          |           | 1 | 722229.81 |                                                                |                    |
| 525.2899 |          |           | 1 | 625476    |                                                                |                    |
| 531.3886 |          |           | 1 | 568651.56 |                                                                |                    |
| 569.3166 | 569.3154 | -2.08     | 1 | 737069.81 | C <sub>24</sub> H <sub>46</sub> N <sub>3</sub> O <sub>12</sub> | (M+H) <sup>+</sup> |
| 570.3192 | 570.3186 | -1.07     | 1 | 174342.05 | C <sub>24</sub> H <sub>46</sub> N <sub>3</sub> O <sub>12</sub> | (M+H) <sup>+</sup> |
| 571.3211 | 571.3209 | -0.3      | 1 | 28989.62  | C <sub>24</sub> H <sub>46</sub> N <sub>3</sub> O <sub>12</sub> | (M+H) <sup>+</sup> |
| 572.3241 | 572.3235 | -0.97     | 1 | 4518.62   | C <sub>24</sub> H <sub>46</sub> N <sub>3</sub> O <sub>12</sub> | (M+H) <sup>+</sup> |
| 613.3431 |          |           | 1 | 670204.25 |                                                                |                    |

MSMS Spectrum

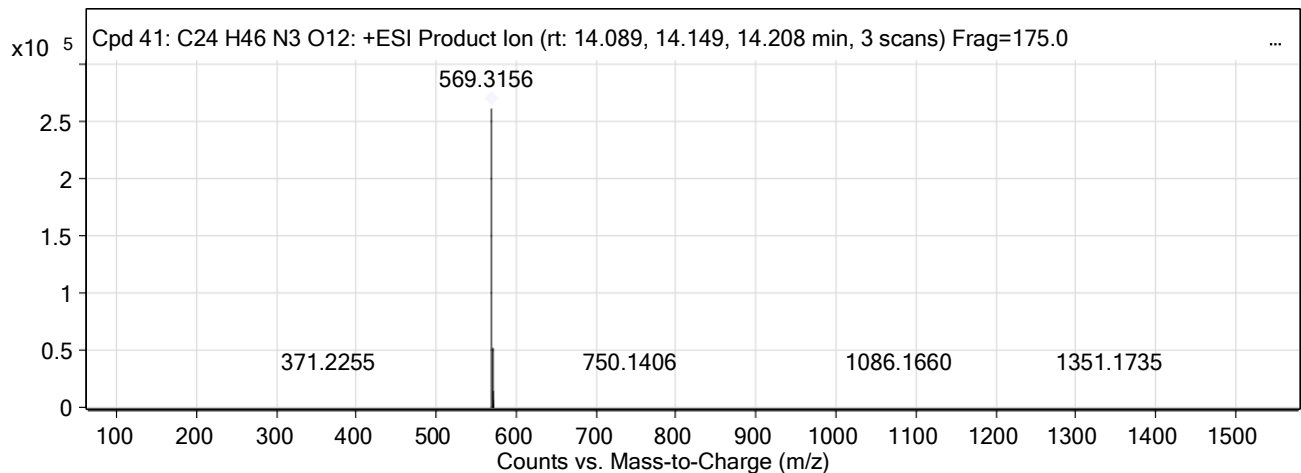



**MS/MS Spectrum Peak List**

| m/z      | Calc m/z | Diff(ppm) | z | Abund     |
|----------|----------|-----------|---|-----------|
| 117.0908 | 117.091  | 1.45      |   | 27.86     |
| 133.087  | 133.0859 | -8.37     |   | 116.29    |
| 144.0766 | 144.0768 | 1.24      |   | 26.3      |
| 177.1109 | 177.1108 | -0.5      |   | 47.76     |
| 221.1384 | 221.1384 | -0.39     |   | 25.28     |
| 309.1917 | 309.1908 | -3.1      |   | 24.04     |
| 309.2775 | 309.2775 | -0.09     |   | 28.07     |
| 327.2013 | 327.2    | -4.07     |   | 25.22     |
| 371.2255 | 371.2262 | 1.82      | 1 | 105.88    |
| 569.3156 | 569.3154 | -0.37     | 1 | 261418.05 |

| Compound Label        | m/z      | RT     | Algorithm  | Mass     |
|-----------------------|----------|--------|------------|----------|
| Cpd 42: C25 H48 N3 O6 | 487.3625 | 14.251 | Auto MS/MS | 486.3551 |

**Compound Chromatograms**

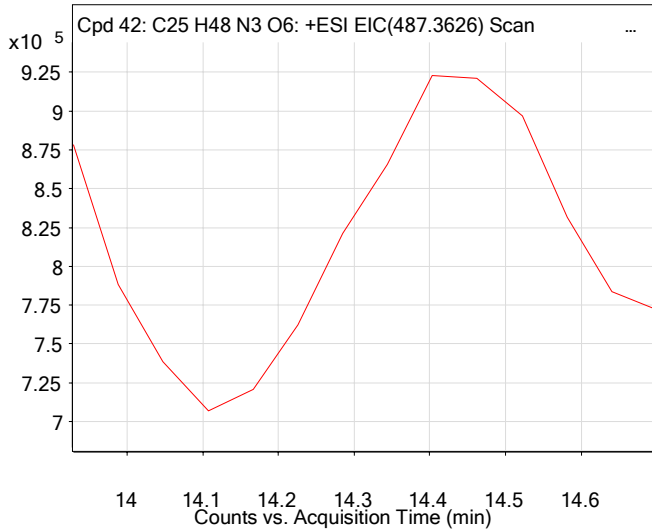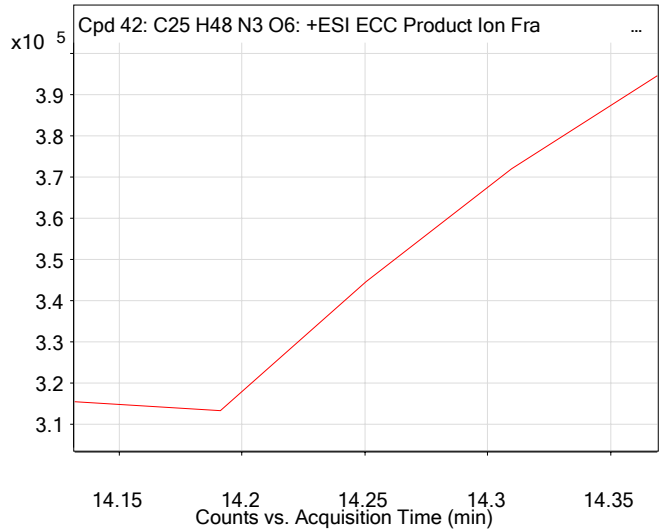

**MS Spectrum**

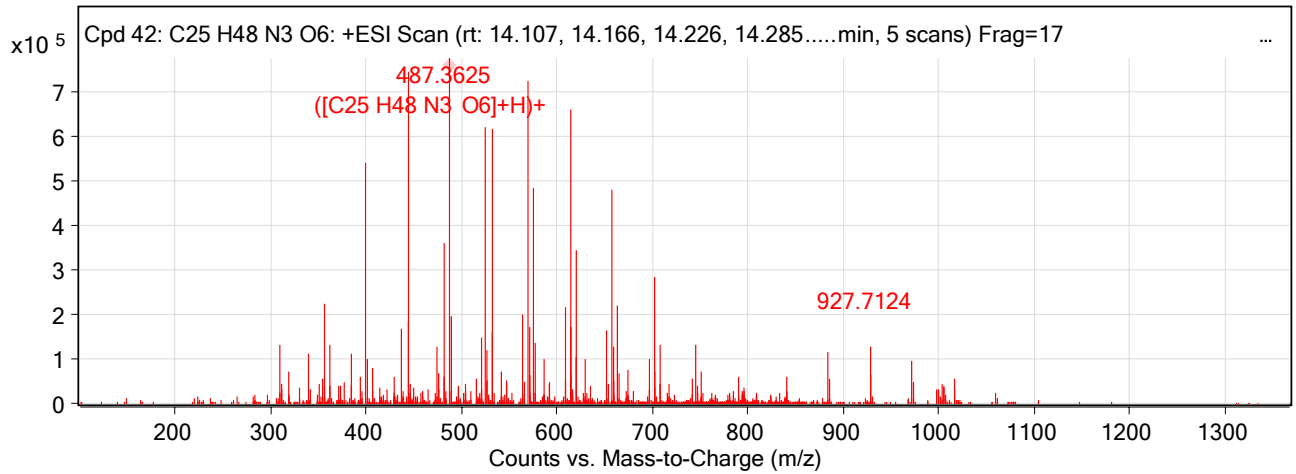

**MS Zoomed Spectrum**

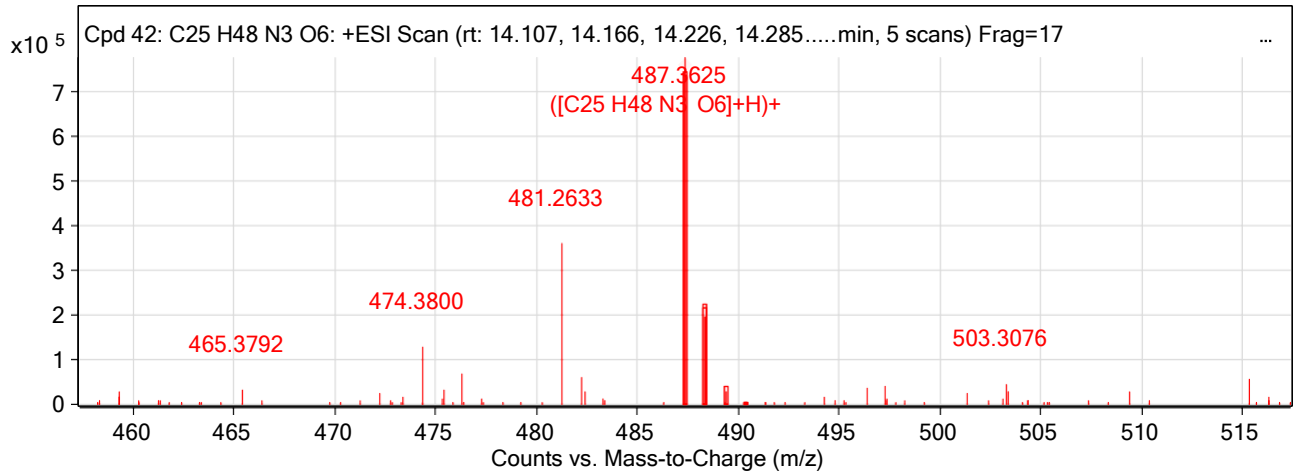

**MS Spectrum Peak List**

| m/z      | Calc m/z | Diff(ppm) | z | Abund     | Formula                                                       | Ion                |
|----------|----------|-----------|---|-----------|---------------------------------------------------------------|--------------------|
| 399.3095 |          |           | 1 | 539587.88 |                                                               |                    |
| 443.3363 |          |           | 1 | 743429.88 |                                                               |                    |
| 487.3625 | 487.3616 | -1.92     | 1 | 775392.19 | C <sub>25</sub> H <sub>48</sub> N <sub>3</sub> O <sub>6</sub> | (M+H) <sup>+</sup> |
| 488.3651 | 488.3648 | -0.67     | 1 | 195562.28 | C <sub>25</sub> H <sub>48</sub> N <sub>3</sub> O <sub>6</sub> | (M+H) <sup>+</sup> |
| 489.367  | 489.3674 | 0.82      | 1 | 27537.32  | C <sub>25</sub> H <sub>48</sub> N <sub>3</sub> O <sub>6</sub> | (M+H) <sup>+</sup> |
| 490.3691 | 490.3701 | 2.02      | 1 | 3565.99   | C <sub>25</sub> H <sub>48</sub> N <sub>3</sub> O <sub>6</sub> | (M+H) <sup>+</sup> |
| 525.2899 |          |           | 1 | 618476.13 |                                                               |                    |
| 531.3887 |          |           | 1 | 615669.88 |                                                               |                    |
| 569.3166 |          |           | 1 | 724523.06 |                                                               |                    |
| 613.3431 |          |           | 1 | 661502.88 |                                                               |                    |

**MS/MS Spectrum**

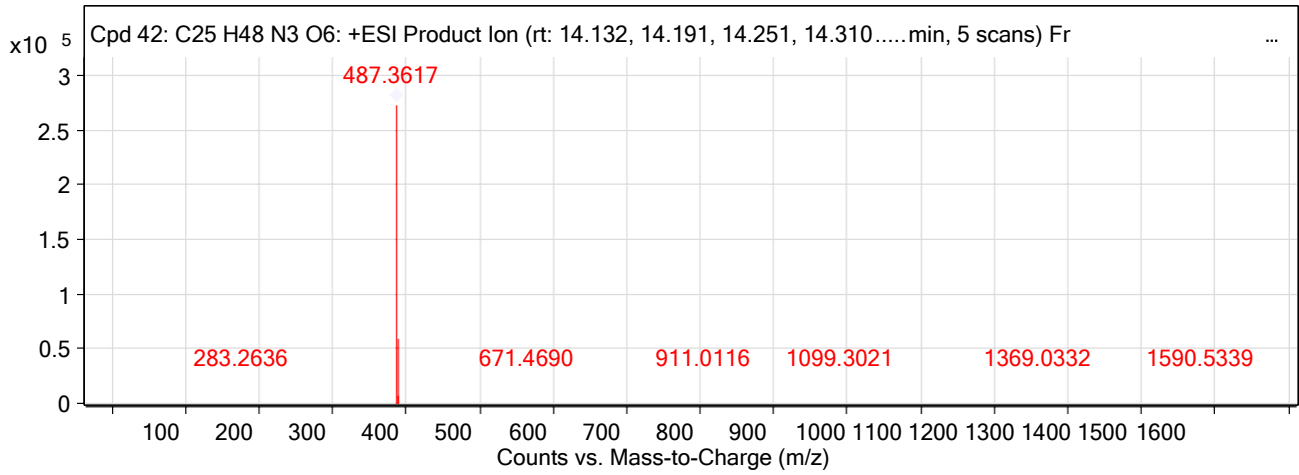

**MS/MS Spectrum Peak List**

| m/z      | Calc m/z | Diff(ppm)  | z | Abund     |
|----------|----------|------------|---|-----------|
| 133.0848 | 133.0846 | -2         |   | 26.31     |
| 283.2636 | 283.2632 | -1.61      | 1 | 235.92    |
| 309.279  | 309.2788 | -0.72      | 1 | 127.05    |
| 484.3389 | 242.1688 | -500001.34 | 2 | 69.97     |
| 486.3291 |          |            | 2 | 573.01    |
| 486.8314 |          |            | 2 | 350.36    |
| 487.3617 | 487.3616 | -0.13      | 1 | 272653.59 |
| 488.3643 |          |            | 1 | 59493.55  |
| 489.3189 |          |            | 2 | 557.49    |
| 489.3667 |          |            | 1 | 6733.72   |

| Compound Label                                                        | m/z      | RT     | Algorithm  | Mass     |
|-----------------------------------------------------------------------|----------|--------|------------|----------|
| Cpd 43: C <sub>23</sub> H <sub>44</sub> N <sub>3</sub> O <sub>5</sub> | 443.3363 | 14.386 | Auto MS/MS | 442.3289 |

**Compound Chromatograms**

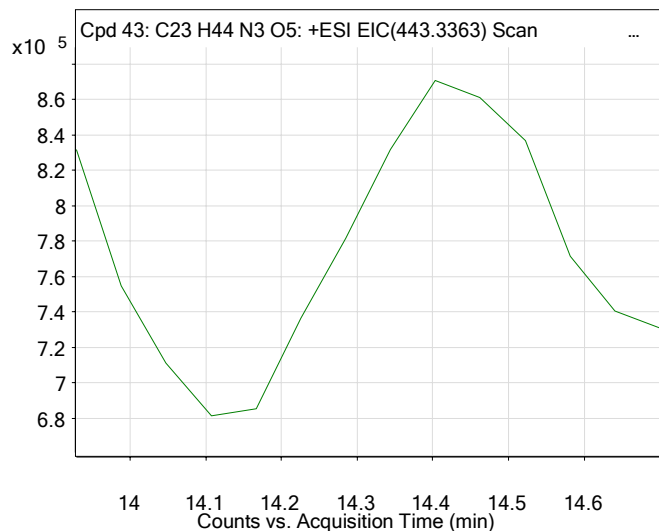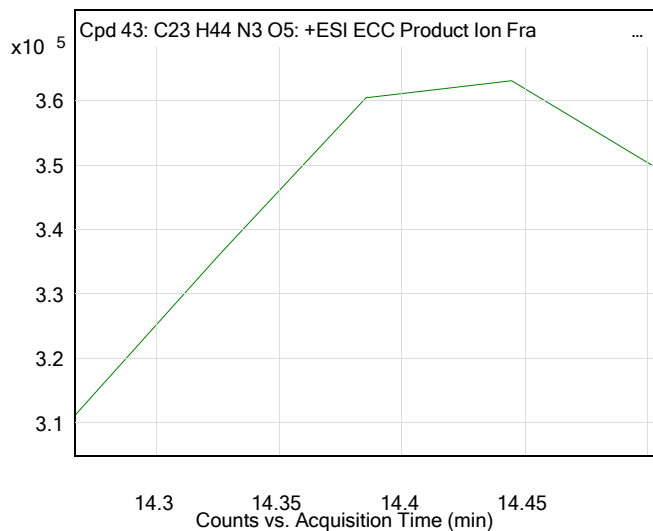

MS Spectrum

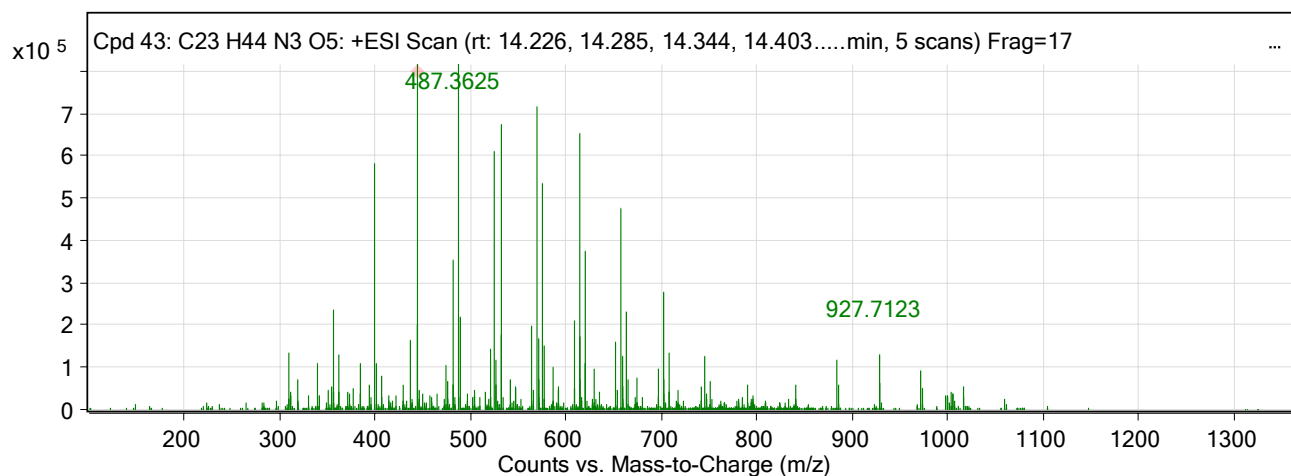

MS Zoomed Spectrum

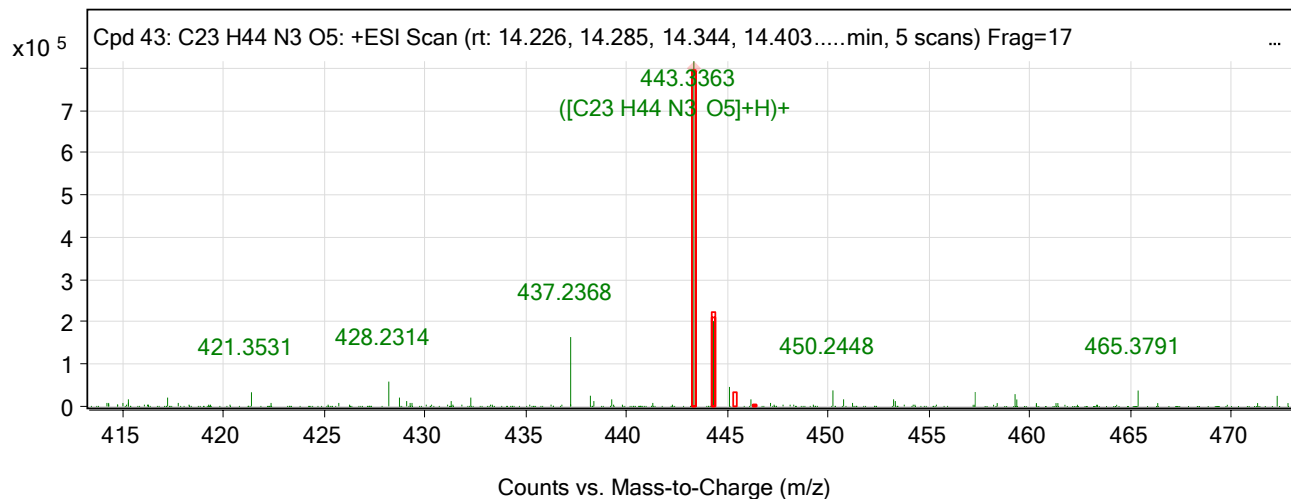

MS Spectrum Peak List

| m/z      | Calc m/z | Diff(ppm) | z | Abund     | Formula       | Ion    |
|----------|----------|-----------|---|-----------|---------------|--------|
| 399.3095 |          |           | 1 | 579705.38 |               |        |
| 443.3363 | 443.3354 | -2.08     | 1 | 816424    | C23 H44 N3 O5 | (M+H)+ |
| 444.3389 | 444.3385 | -0.86     | 1 | 202356.81 | C23 H44 N3 O5 | (M+H)+ |
| 445.3406 | 445.3412 | 1.26      | 1 | 25715.79  | C23 H44 N3 O5 | (M+H)+ |
| 446.3428 | 446.3438 | 2.23      | 1 | 2823      | C23 H44 N3 O5 | (M+H)+ |
| 487.3625 |          |           | 1 | 858582    |               |        |
| 525.2898 |          |           | 1 | 611591.56 |               |        |

MSMS Spectrum

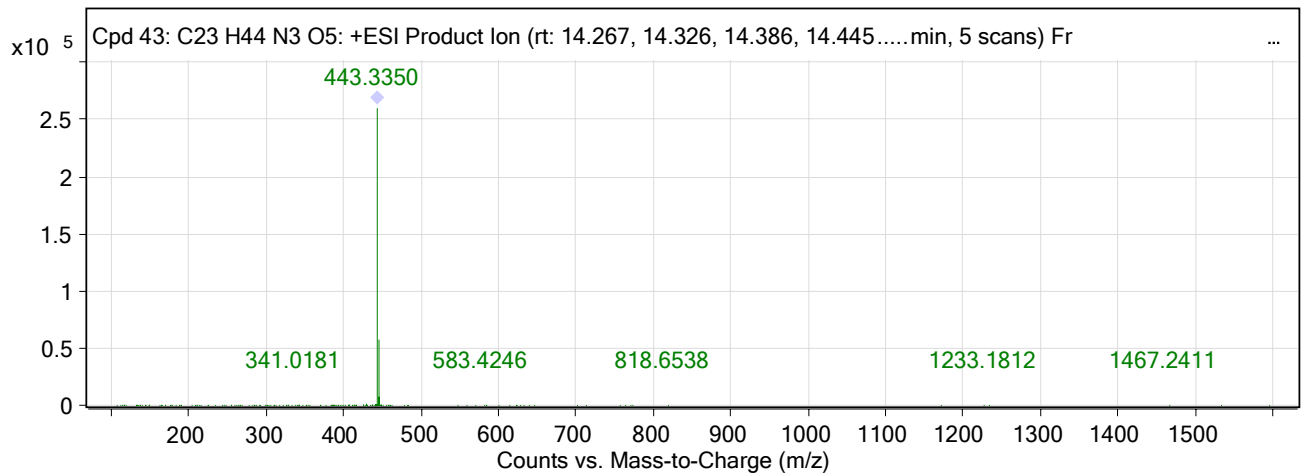

MS/MS Spectrum PeakList

| m/z      | Calc m/z | Diff(ppm)  | z | Abund    |
|----------|----------|------------|---|----------|
| 113.0583 | 113.0584 | 0.17       |   | 13.63    |
| 117.0914 | 117.091  | -3.28      |   | 14.24    |
| 137.0134 | 137.0193 | 42.72      |   | 16.41    |
| 147.0657 | 147.0652 | -3.71      |   | 93.11    |
| 149.0452 | 149.0444 | -5.34      |   | 13.42    |
| 177.1119 | 177.1121 | 1.47       |   | 13.57    |
| 303.2338 | 303.2278 | -19.66     |   | 20.33    |
| 309.2779 | 309.2775 | -1.47      | 1 | 51.53    |
| 441.3256 | 220.6596 | -500007.32 | 2 | 13.49    |
| 443.335  | 443.3354 | 0.89       | 1 | 260292.8 |

| Compound Label                                                        | m/z      | RT     | Algorithm  | Mass     |
|-----------------------------------------------------------------------|----------|--------|------------|----------|
| Cpd 44: C <sub>25</sub> H <sub>48</sub> N <sub>3</sub> O <sub>6</sub> | 487.3625 | 14.547 | Auto MS/MS | 486.3551 |

Compound Chromatograms

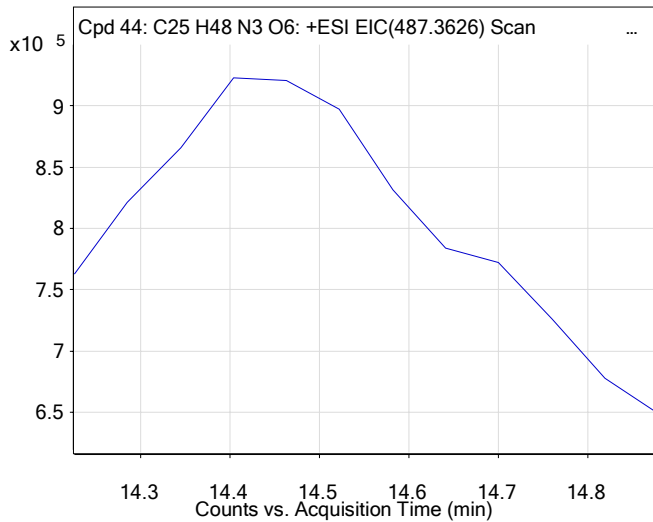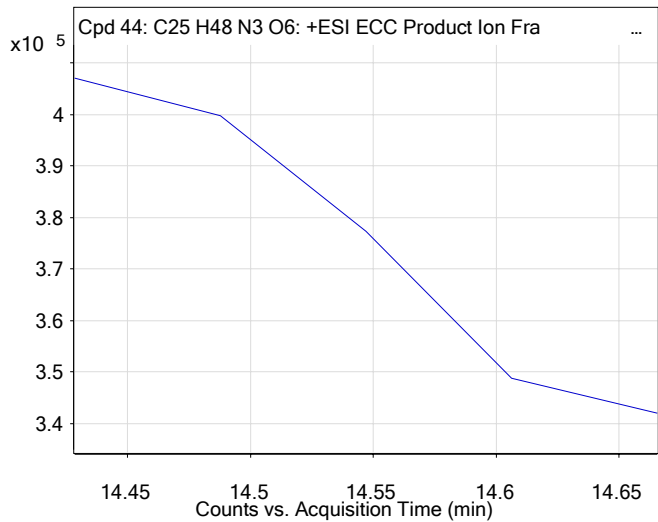

MS Spectrum

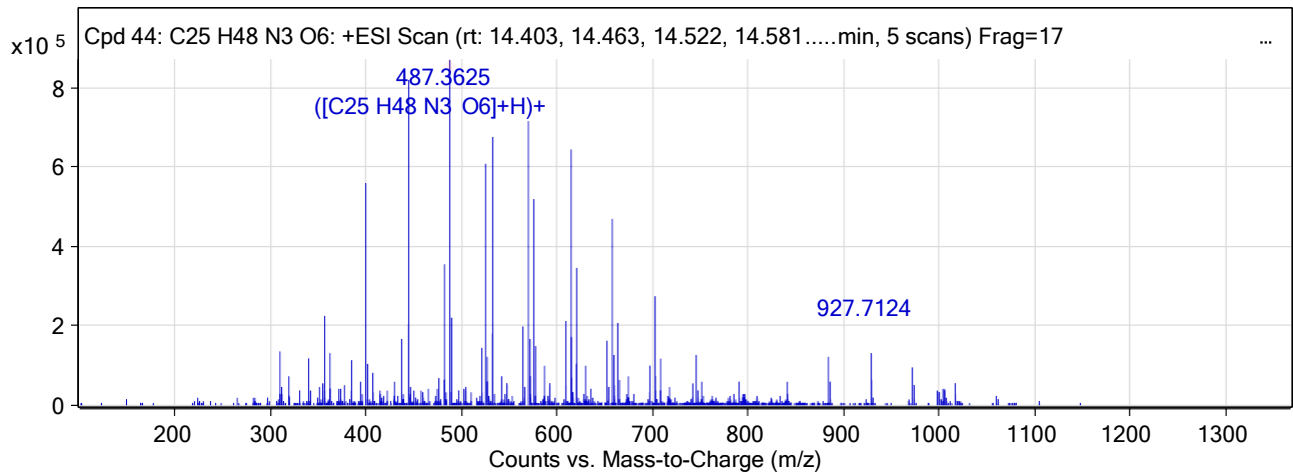

MS Zoomed Spectrum

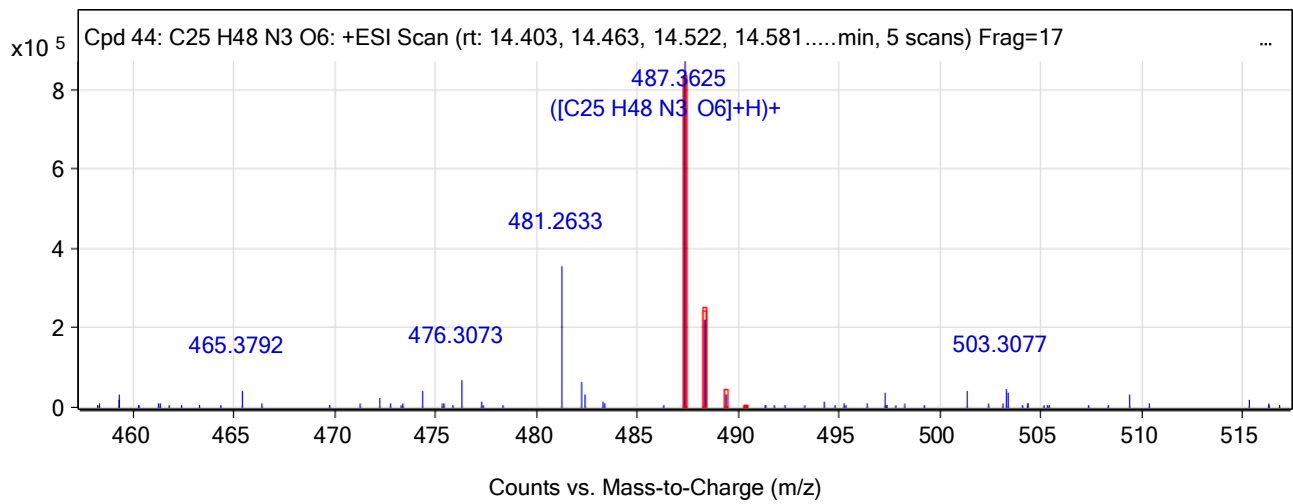

MS Spectrum Peak List

| m/z      | Calc m/z | Diff(ppm) | z | Abund     | Formula                                                       | Ion    |
|----------|----------|-----------|---|-----------|---------------------------------------------------------------|--------|
| 399.3095 |          |           | 1 | 556959.88 |                                                               |        |
| 443.3364 |          |           | 1 | 816083.69 |                                                               |        |
| 487.3625 | 487.3616 | -1.94     | 1 | 871329.81 | C <sub>25</sub> H <sub>48</sub> N <sub>3</sub> O <sub>6</sub> | (M+H)+ |
| 488.3652 | 488.3648 | -0.89     | 1 | 220065.41 | C <sub>25</sub> H <sub>48</sub> N <sub>3</sub> O <sub>6</sub> | (M+H)+ |
| 489.3672 | 489.3674 | 0.41      | 1 | 30525.59  | C <sub>25</sub> H <sub>48</sub> N <sub>3</sub> O <sub>6</sub> | (M+H)+ |
| 490.3692 | 490.3701 | 1.81      | 1 | 3817.85   | C <sub>25</sub> H <sub>48</sub> N <sub>3</sub> O <sub>6</sub> | (M+H)+ |
| 525.29   |          |           | 1 | 607888.88 |                                                               |        |
| 531.3888 |          |           | 1 | 674885.31 |                                                               |        |
| 569.3168 |          |           | 1 | 713911    |                                                               |        |
| 613.3431 |          |           | 1 | 642977.88 |                                                               |        |

MSMS Spectrum

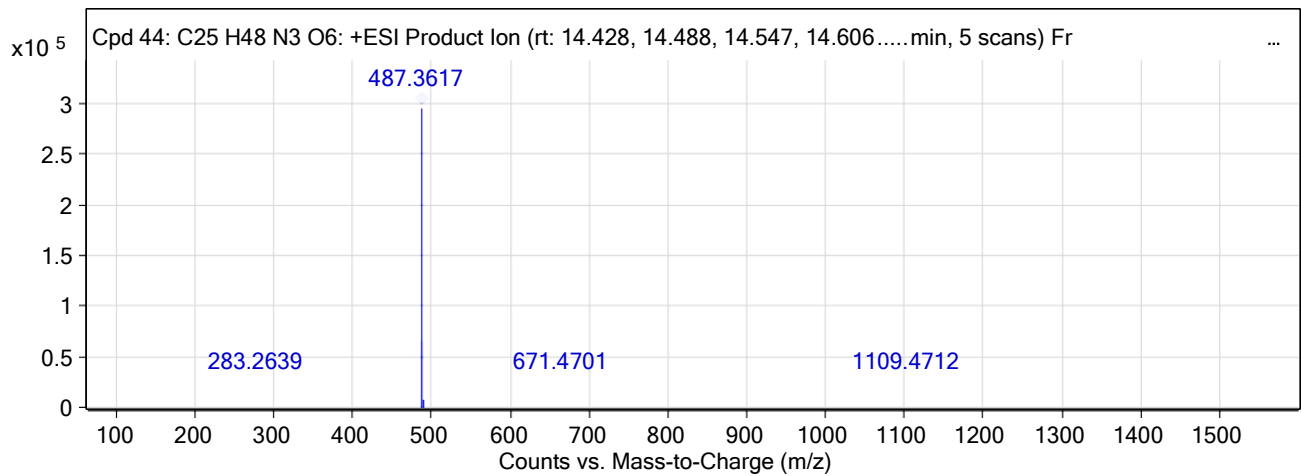

**MS/MS Spectrum Peak List**

| m/z      | Calc m/z | Diff(ppm) | z | Abund     |
|----------|----------|-----------|---|-----------|
| 210.1166 | 210.1125 | -19.73    |   | 27.18     |
| 265.2553 | 265.2526 | -10.24    |   | 30.16     |
| 283.2639 | 283.2632 | -2.67     | 1 | 226.09    |
| 309.2791 | 309.2788 | -0.86     |   | 61.34     |
| 310.2821 | 310.2853 | 10.28     |   | 35.13     |
| 486.3621 | 486.3538 | -17.21    |   | 55.4      |
| 487.3617 | 487.3616 | -0.27     | 1 | 294705.88 |
| 488.3644 |          |           | 1 | 64724.89  |
| 489.317  |          |           | 2 | 507.91    |
| 489.3668 |          |           | 1 | 6951.67   |

| Compound Label      | m/z      | RT     | Algorithm  | Mass     |
|---------------------|----------|--------|------------|----------|
| Cpd 45: C26 H48 O13 | 569.3169 | 14.911 | Auto MS/MS | 568.3094 |

**Compound Chromatograms**

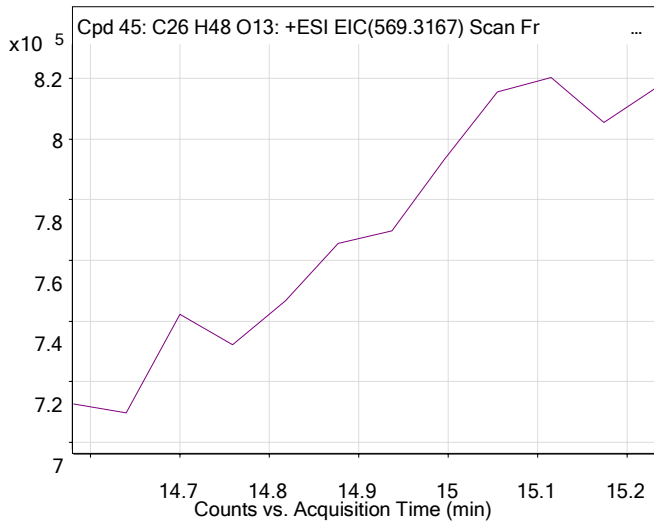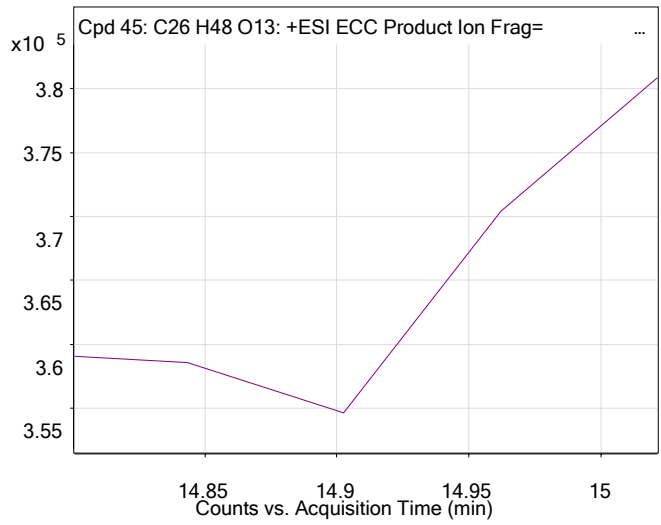

MS Spectrum

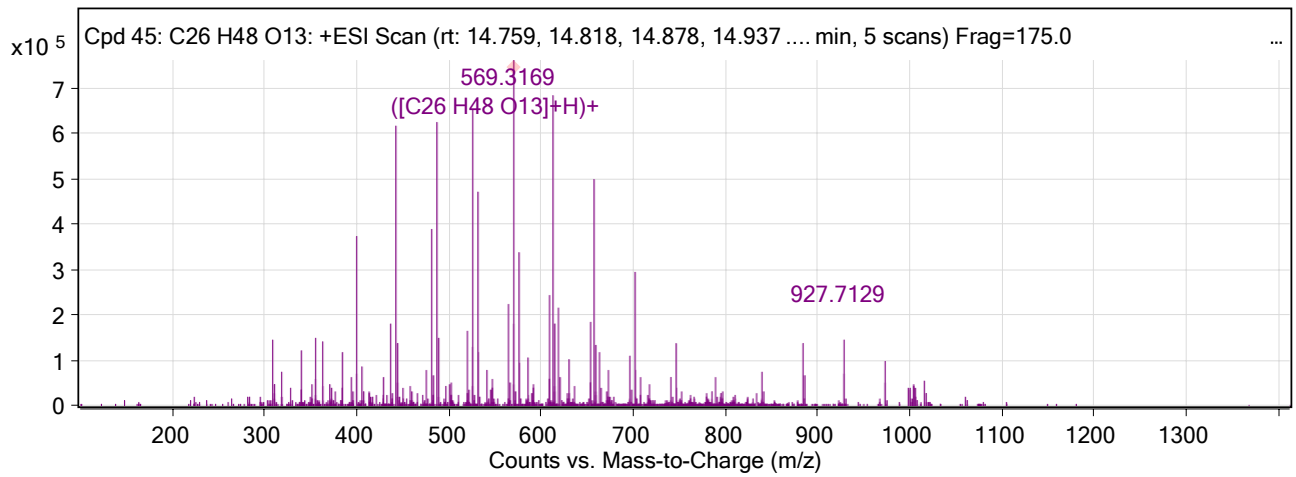

MS Zoomed Spectrum

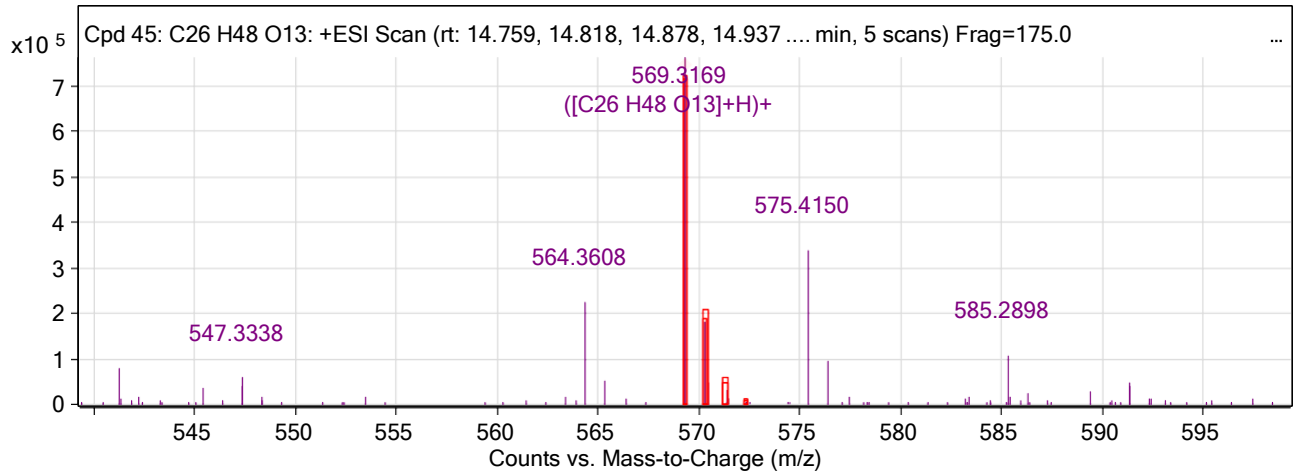

**MS Spectrum Peak List**

| m/z      | Calc m/z | Diff(ppm) | z | Abund     | Formula     | Ion    |
|----------|----------|-----------|---|-----------|-------------|--------|
| 443.3361 |          |           | 1 | 618224.5  |             |        |
| 487.3626 |          |           | 1 | 624280.56 |             |        |
| 525.2903 |          |           | 1 | 650290.88 |             |        |
| 531.3889 |          |           | 1 | 471339.75 |             |        |
| 569.3169 | 569.3168 | -0.24     | 1 | 761485.75 | C26 H48 O13 | (M+H)+ |
| 570.3194 | 570.3202 | 1.41      | 1 | 180016.53 | C26 H48 O13 | (M+H)+ |
| 571.3215 | 571.3226 | 1.98      | 1 | 30742.43  | C26 H48 O13 | (M+H)+ |
| 572.3248 | 572.3253 | 0.77      | 1 | 4531.95   | C26 H48 O13 | (M+H)+ |
| 613.3435 |          |           | 1 | 684831.44 |             |        |
| 657.3693 |          |           | 1 | 498673    |             |        |

**MS/MS Spectrum**

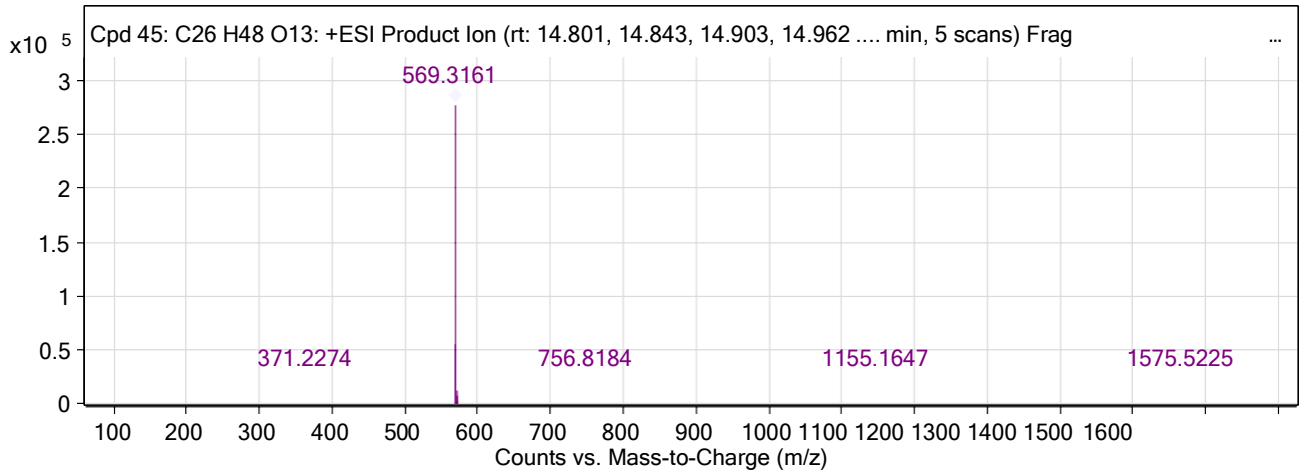

**MS/MS Spectrum Peak List**

| m/z      | Calc m/z | Diff(ppm)  | z | Abund     |
|----------|----------|------------|---|-----------|
| 102.0691 | 102.0675 | -15.58     |   | 15.48     |
| 133.0864 | 133.0859 | -3.56      |   | 133.05    |
| 177.1119 | 177.1121 | 1.31       |   | 84.02     |
| 221.1394 | 110.5689 | -500003.58 | 2 | 20.11     |
| 307.217  | 307.2115 | -17.94     |   | 17.42     |
| 309.2783 | 309.2788 | 1.54       | 1 | 34.47     |
| 509.334  | 509.332  | -3.87      |   | 11.88     |
| 528.3148 | 528.314  | -1.41      |   | 12.13     |
| 538.2978 | 269.1489 | -500000    | 2 | 17.71     |
| 569.3161 | 569.3168 | 1.24       | 1 | 277176.44 |

| Compound Label      | m/z      | RT     | Algorithm  | Mass     |
|---------------------|----------|--------|------------|----------|
| Cpd 46: C26 H48 O13 | 569.3169 | 15.199 | Auto MS/MS | 568.3094 |

**Compound Chromatograms**

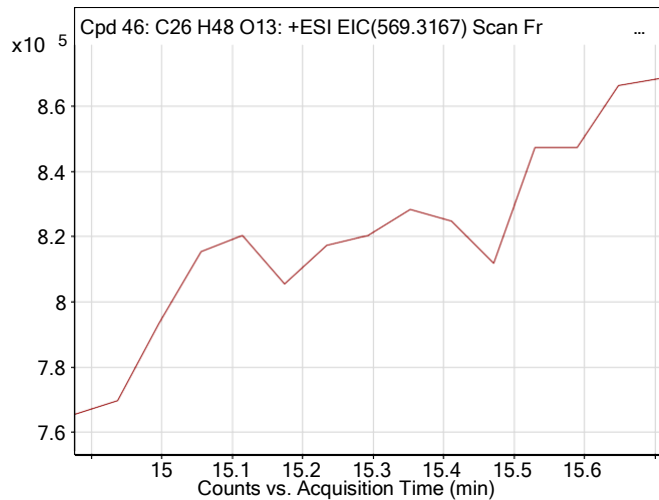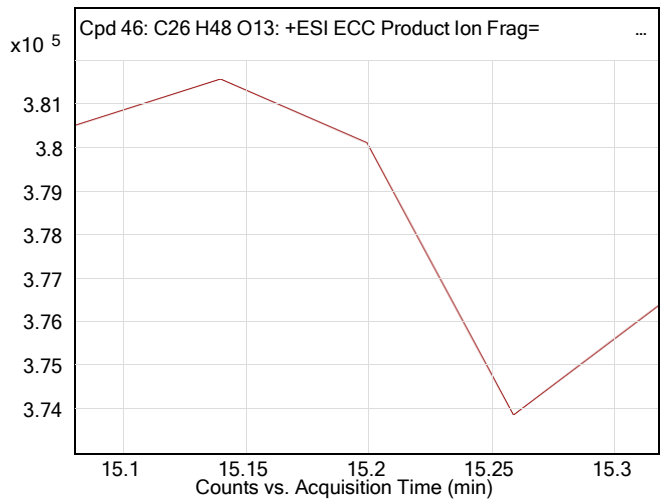

MS Spectrum

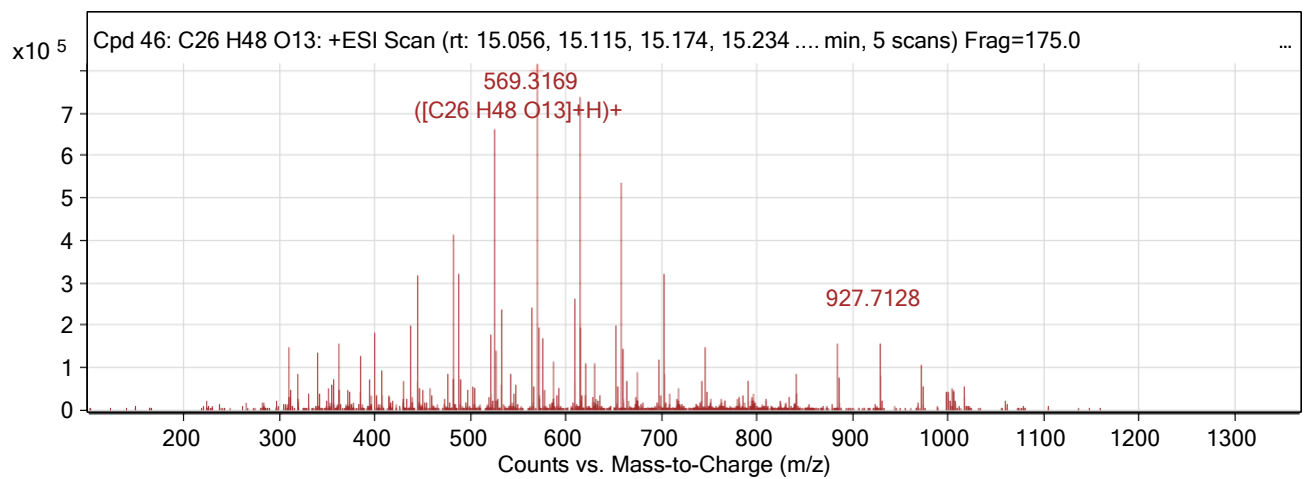

MS Zoomed Spectrum

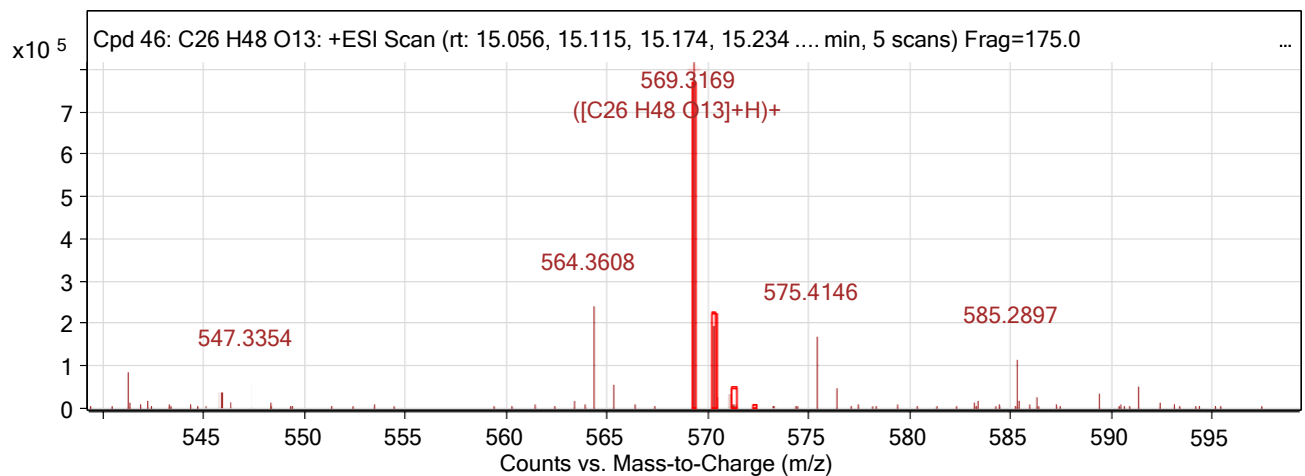

MS Spectrum Peak List

| m/z      | Calc m/z | Diff(ppm) | z | Abund     | Formula     | Ion    |
|----------|----------|-----------|---|-----------|-------------|--------|
| 481.2635 |          |           | 1 | 411716.41 |             |        |
| 487.3622 |          |           | 1 | 321046    |             |        |
| 525.2906 |          |           | 1 | 660181    |             |        |
| 569.3169 | 569.3168 | -0.17     | 1 | 815754.63 | C26 H48 O13 | (M+H)+ |
| 570.3194 | 570.3202 | 1.36      | 1 | 194135.42 | C26 H48 O13 | (M+H)+ |
| 571.3216 | 571.3226 | 1.74      | 1 | 32651.82  | C26 H48 O13 | (M+H)+ |
| 572.3246 | 572.3253 | 1.25      | 1 | 4417.55   | C26 H48 O13 | (M+H)+ |
| 613.3434 |          |           | 1 | 734624.19 |             |        |
| 657.3693 |          |           | 1 | 534955.63 |             |        |



MSMS Spectrum

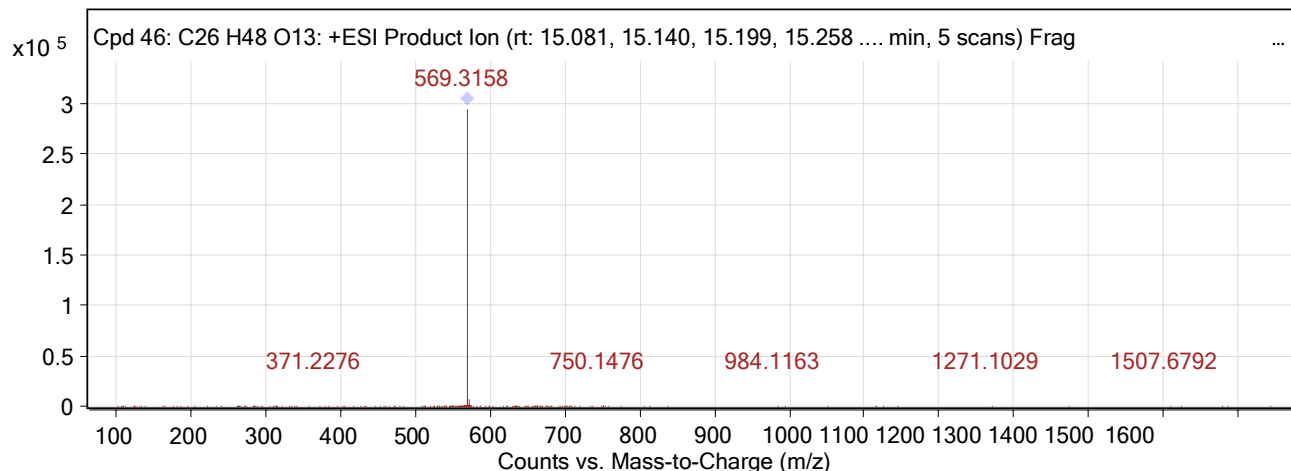

MS/MS Spectrum PeakList

| m/z      | Calc m/z | Diff(ppm) | z | Abund     |
|----------|----------|-----------|---|-----------|
| 111.1161 | 111.1168 | 6.68      |   | 11.16     |
| 133.0873 | 133.0859 | -10.05    |   | 114.11    |
| 177.1113 | 177.1121 | 4.68      |   | 28.78     |
| 283.2637 | 283.2632 | -1.77     |   | 14.99     |
| 309.2813 | 309.2788 | -8.22     |   | 43.44     |
| 311.2952 | 311.2945 | -2.51     |   | 30.91     |
| 513.321  | 513.3269 | 11.49     |   | 15.77     |
| 538.2968 | 538.2984 | 2.88      |   | 11.82     |
| 569.3158 | 569.3168 | 1.63      | 1 | 295036.31 |
| 570.3185 |          |           | 1 | 57478.53  |

| Compound Label      | m/z     | RT     | Algorithm  | Mass     |
|---------------------|---------|--------|------------|----------|
| Cpd 47: C28 H52 O14 | 613.343 | 15.394 | Auto MS/MS | 612.3355 |

Compound Chromatograms

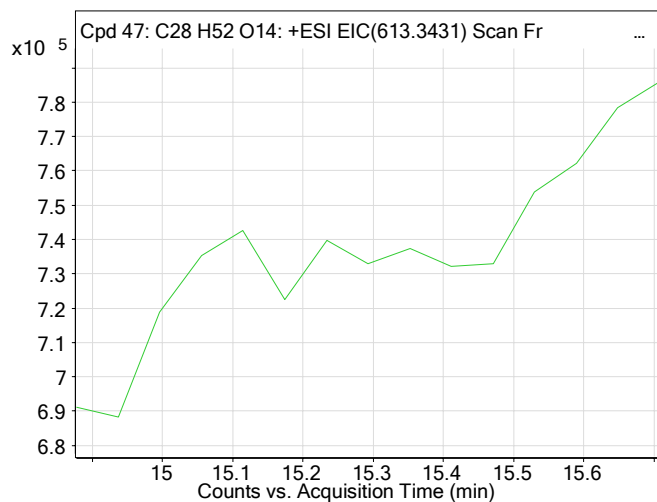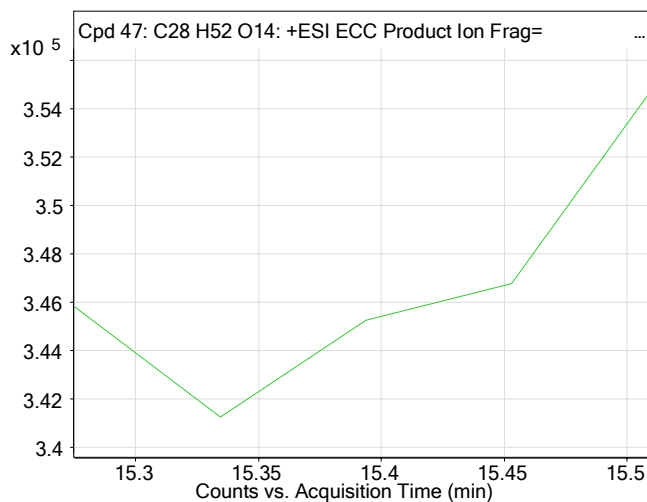

MS Spectrum

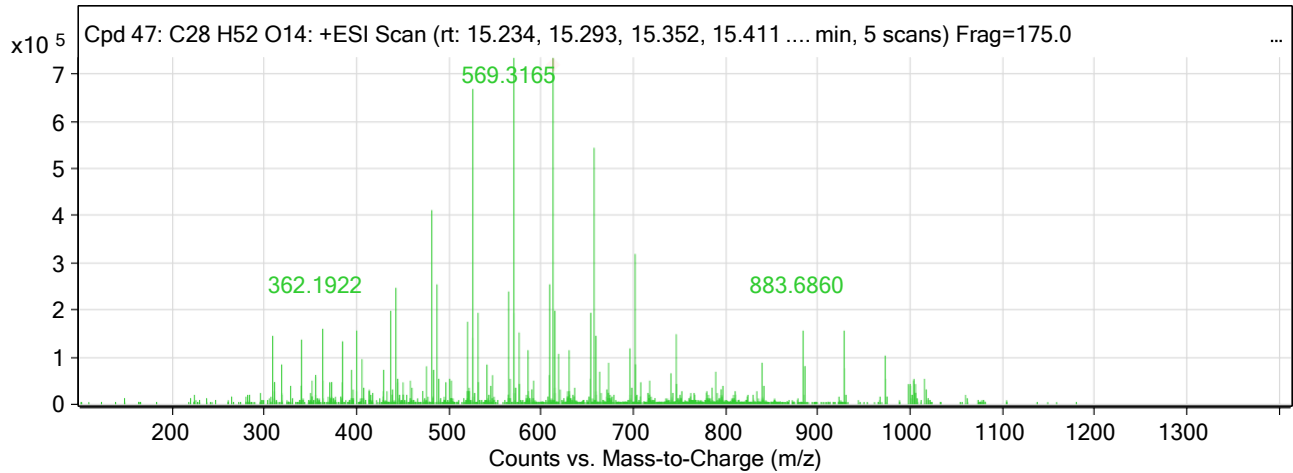

MS Zoomed Spectrum

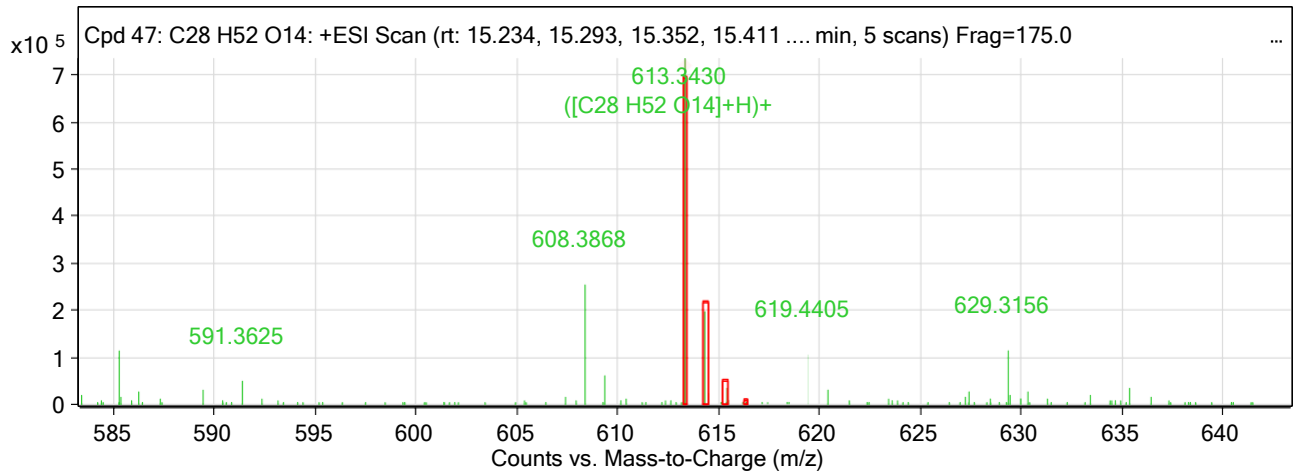

MS Spectrum Peak List

| m/z      | Calc m/z | Diff(ppm) | z | Abund     | Formula     | Ion    |
|----------|----------|-----------|---|-----------|-------------|--------|
| 481.2632 |          |           | 1 | 407922.44 |             |        |
| 525.2903 |          |           | 1 | 666210.88 |             |        |
| 569.3165 |          |           | 1 | 820530.88 |             |        |
| 608.3868 |          |           | 1 | 254049.59 |             |        |
| 613.343  | 613.343  | -0.06     | 1 | 735065.94 | C28 H52 O14 | (M+H)+ |
| 614.3454 | 614.3464 | 1.56      | 1 | 196777.53 | C28 H52 O14 | (M+H)+ |
| 615.3475 | 615.3489 | 2.26      | 1 | 35712.72  | C28 H52 O14 | (M+H)+ |
| 616.3559 | 616.3515 | -6.99     | 1 | 5151.23   | C28 H52 O14 | (M+H)+ |
| 657.3689 |          |           | 1 | 541646.69 |             |        |
| 701.395  |          |           | 1 | 318881    |             |        |

MSMS Spectrum

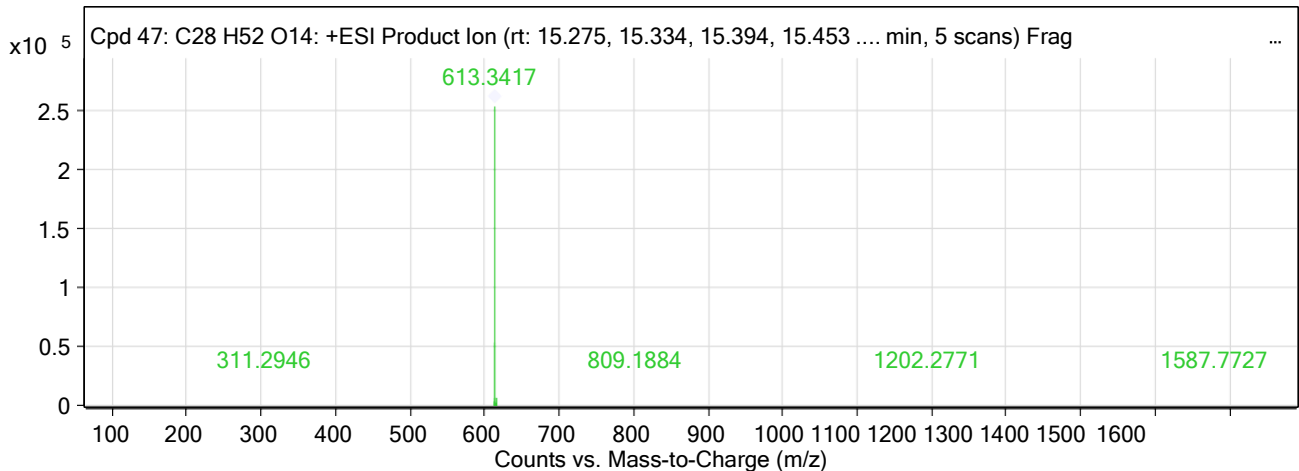

**MS/MS Spectrum Peak List**

| m/z      | Calc m/z | Diff(ppm) | z | Abund     |
|----------|----------|-----------|---|-----------|
| 133.0854 | 133.0859 | 3.86      | 1 | 51.01     |
| 309.2794 | 309.2788 | -1.78     | 1 | 52.38     |
| 357.0692 | 357.0664 | -7.93     | 1 | 30.52     |
| 609.3105 | 609.3117 | 1.97      | 1 | 103.15    |
| 612.6382 |          |           |   | 3368.23   |
| 612.8891 |          |           | 2 | 2842.77   |
| 613.3417 | 613.343  | 2.1       | 1 | 253925.75 |
| 614.3444 |          |           | 1 | 53420.11  |
| 614.4832 |          |           |   | 5713.85   |
| 615.347  |          |           | 1 | 6514.62   |

| Compound Label      | m/z      | RT     | Algorithm  | Mass     |
|---------------------|----------|--------|------------|----------|
| Cpd 48: C26 H48 O13 | 569.3168 | 15.496 | Auto MS/MS | 568.3093 |

**Compound Chromatograms**

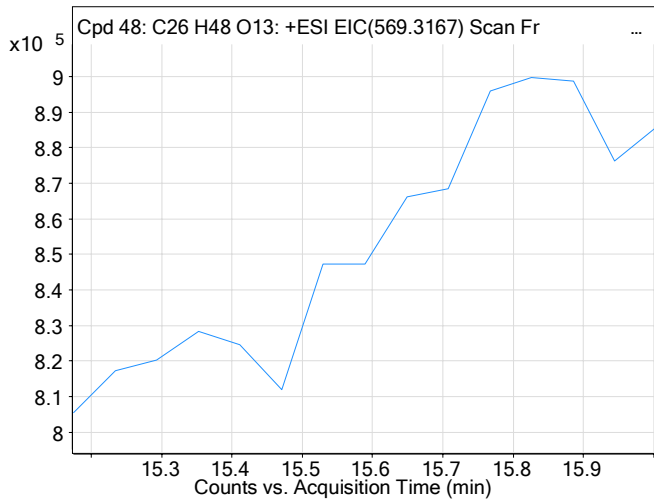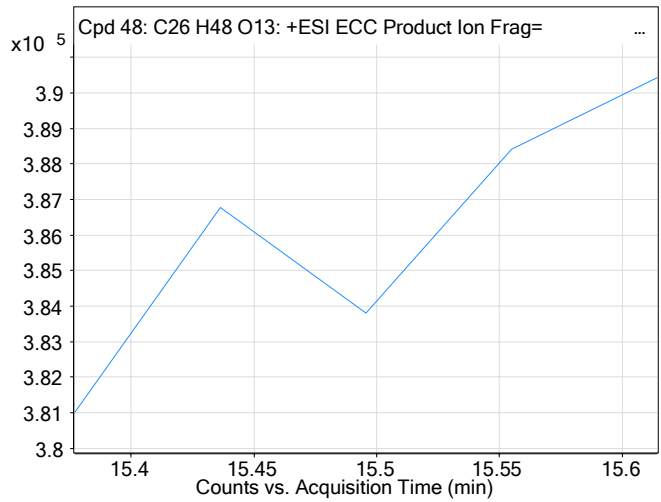

MS Spectrum

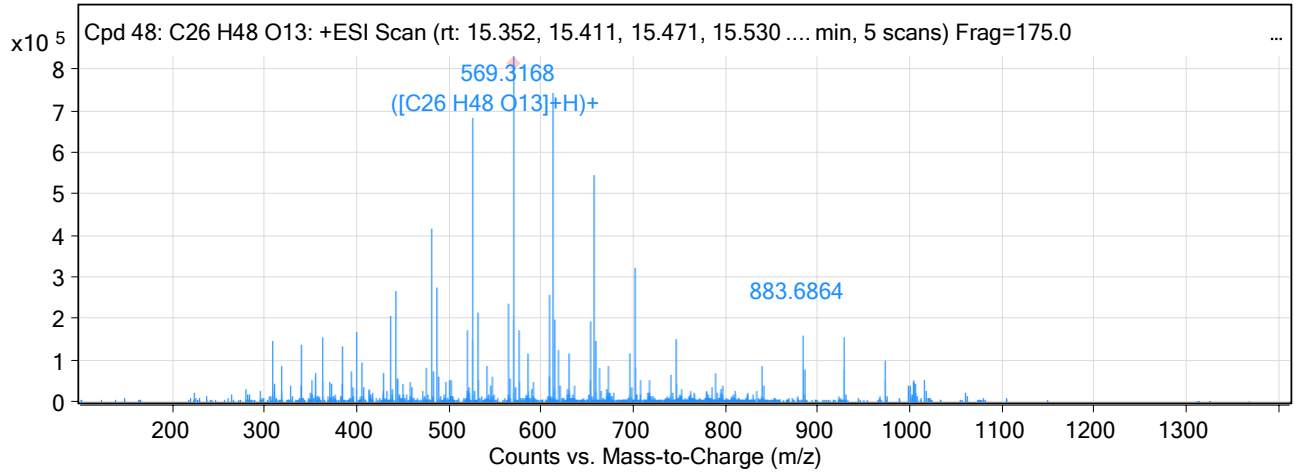

MS Zoomed Spectrum

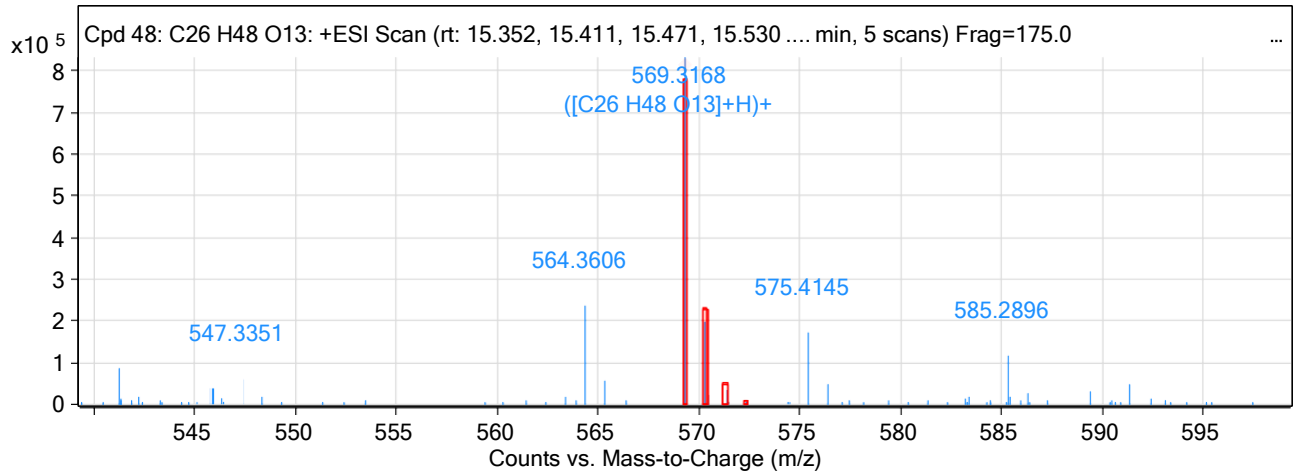

**MS Spectrum Peak List**

| m/z      | Calc m/z | Diff(ppm) | z | Abund     | Formula     | Ion    |
|----------|----------|-----------|---|-----------|-------------|--------|
| 481.2634 |          |           | 1 | 417243.47 |             |        |
| 487.362  |          |           | 1 | 273161.56 |             |        |
| 525.2905 |          |           | 1 | 680519.88 |             |        |
| 569.3168 | 569.3168 | 0         | 1 | 831946.94 | C26 H48 O13 | (M+H)+ |
| 570.3193 | 570.3202 | 1.52      | 1 | 196328.72 | C26 H48 O13 | (M+H)+ |
| 571.3215 | 571.3226 | 1.9       | 1 | 33250.46  | C26 H48 O13 | (M+H)+ |
| 572.3244 | 572.3253 | 1.52      | 1 | 4757.53   | C26 H48 O13 | (M+H)+ |
| 613.3433 |          |           | 1 | 743740.94 |             |        |
| 657.3692 |          |           | 1 | 545162.56 |             |        |
| 701.3952 |          |           | 1 | 320518.19 |             |        |

**MS/MS Spectrum**

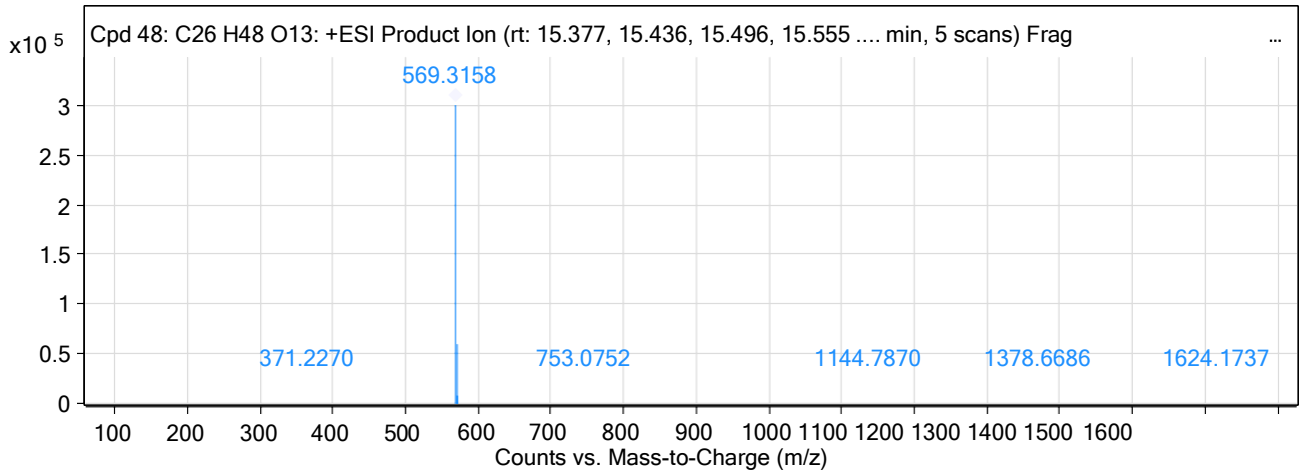

**MS/MS Spectrum PeakList**

| m/z      | Calc m/z | Diff(ppm) | z | Abund     |
|----------|----------|-----------|---|-----------|
| 117.0908 | 117.091  | 1.44      |   | 19.4      |
| 133.086  | 133.0859 | -0.41     |   | 101.36    |
| 139.1468 | 139.1481 | 9.29      |   | 15.86     |
| 166.1292 | 166.1352 | 35.95     |   | 19.29     |
| 177.1119 | 177.1121 | 1.41      |   | 21.7      |
| 307.2164 | 307.2115 | -15.87    |   | 15        |
| 309.2807 | 309.2788 | -6.26     |   | 45.31     |
| 311.2943 | 311.2945 | 0.41      | 1 | 57.72     |
| 566.2893 | 566.2933 | 7.11      | 1 | 37.05     |
| 569.3158 | 569.3168 | 1.77      | 1 | 300159.47 |

| Compound Label      | m/z      | RT    | Algorithm  | Mass     |
|---------------------|----------|-------|------------|----------|
| Cpd 49: C28 H52 O14 | 613.3431 | 15.69 | Auto MS/MS | 612.3356 |

**Compound Chromatograms**

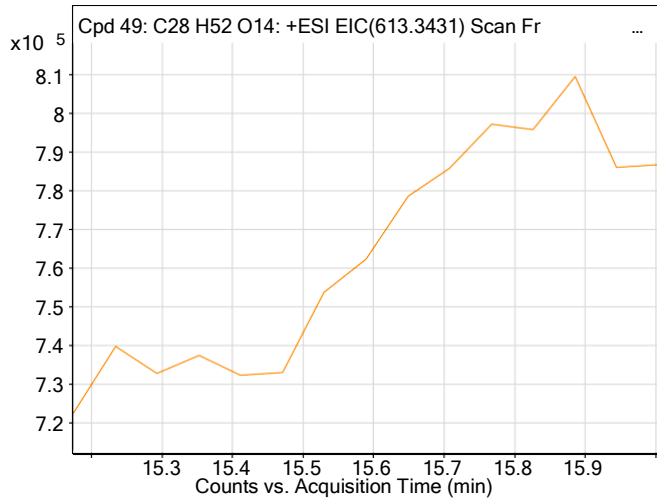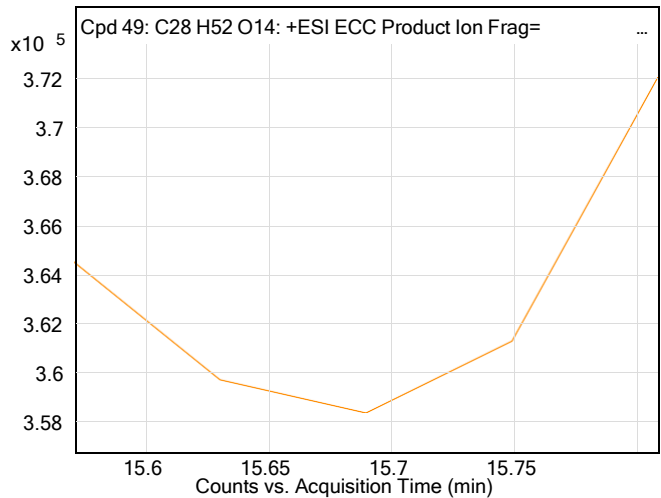

MS Spectrum

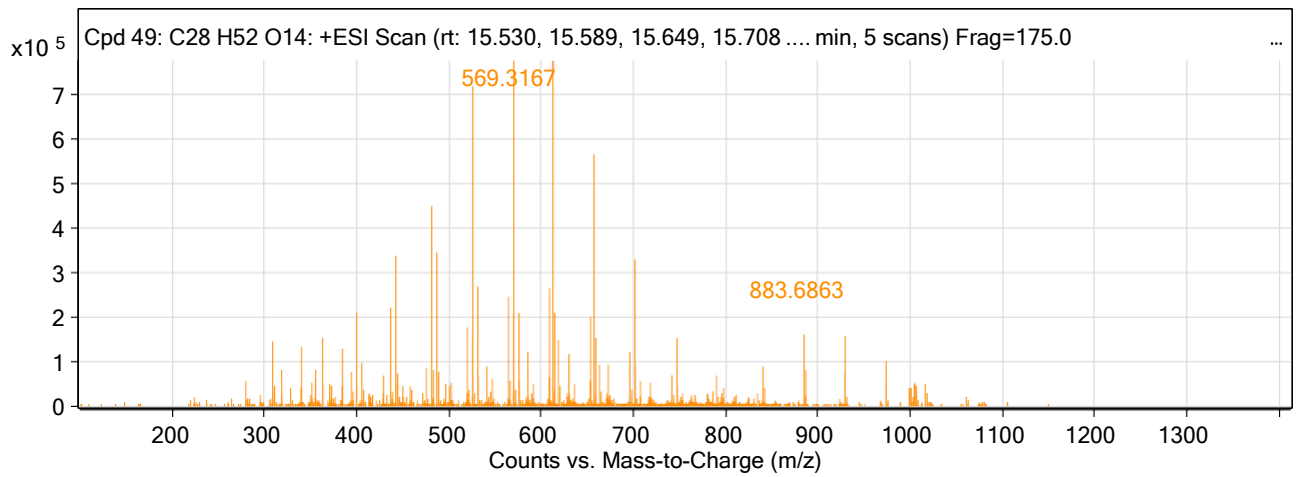

MS Zoomed Spectrum

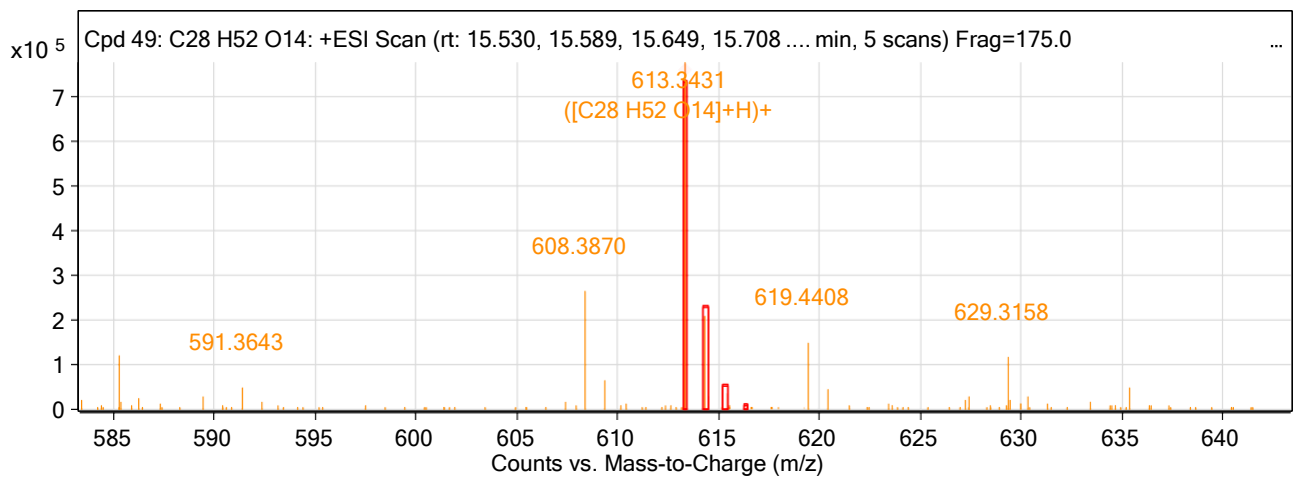

MS Spectrum Peak List

| m/z      | Calc m/z | Diff(ppm) | z | Abund     | Formula     | Ion    |
|----------|----------|-----------|---|-----------|-------------|--------|
| 443.3356 |          |           | 1 | 335055.09 |             |        |
| 481.2634 |          |           | 1 | 446216.91 |             |        |
| 487.3621 |          |           | 1 | 342141.78 |             |        |
| 525.2904 |          |           | 1 | 713908    |             |        |
| 569.3167 |          |           | 1 | 865051.5  |             |        |
| 613.3431 | 613.343  | -0.22     | 1 | 775513.63 | C28 H52 O14 | (M+H)+ |
| 614.3457 | 614.3464 | 1.2       | 1 | 206977.95 | C28 H52 O14 | (M+H)+ |
| 615.3477 | 615.3489 | 1.92      | 1 | 37917.46  | C28 H52 O14 | (M+H)+ |

MSMS Spectrum

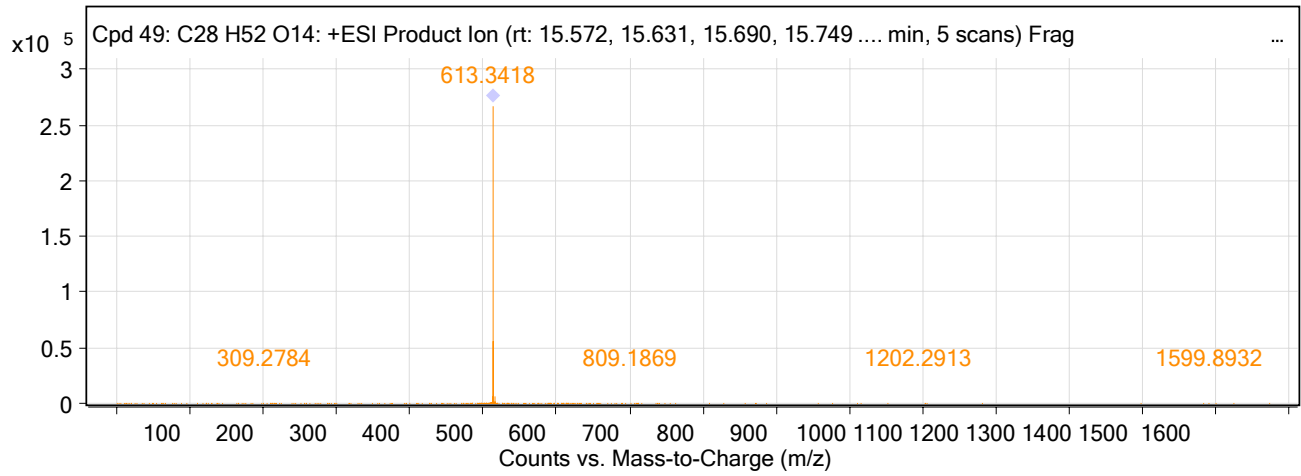

MS/MS Spectrum Peak List

| m/z      | Calc m/z | Diff(ppm) | z | Abund     |
|----------|----------|-----------|---|-----------|
| 133.0872 | 133.0859 | -9.72     |   | 57.38     |
| 177.1128 | 177.1121 | -3.77     |   | 36.55     |
| 309.2784 | 309.2788 | 1.45      | 1 | 108.52    |
| 357.0688 | 357.0664 | -6.68     | 1 | 55.14     |
| 609.3111 | 304.6556 | -49999.98 | 2 | 57.17     |
| 612.6383 |          |           | 2 | 3323.54   |
| 613.3418 | 613.343  | 1.85      | 1 | 267461.31 |
| 614.3446 |          |           | 1 | 56245.45  |
| 614.4835 |          |           | 1 | 6498.9    |
| 615.3469 |          |           | 1 | 6528.05   |

| Compound Label         | m/z      | RT     | Algorithm  | Mass     |
|------------------------|----------|--------|------------|----------|
| Cpd 50: C24 H46 N3 O12 | 569.3165 | 15.792 | Auto MS/MS | 568.3091 |

Compound Chromatograms

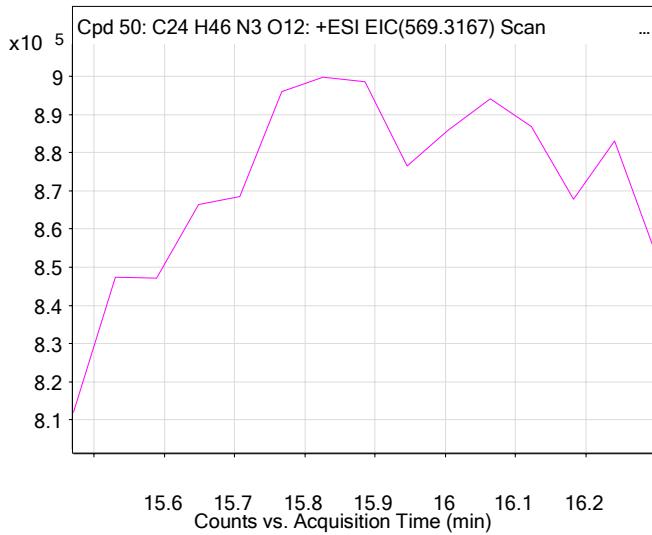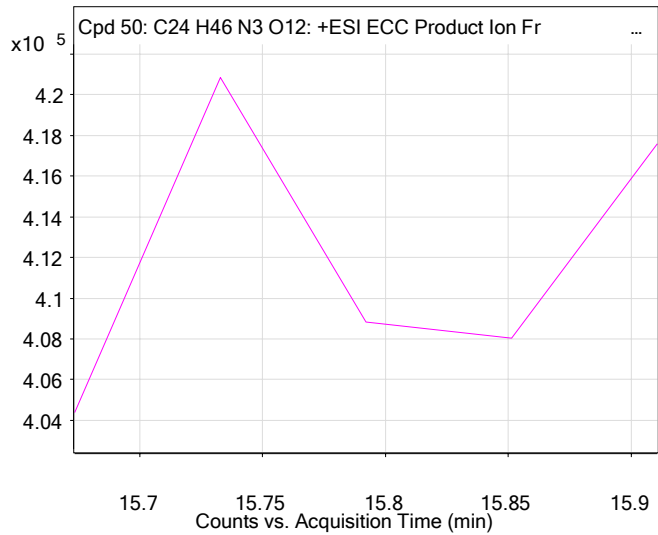

MS Spectrum

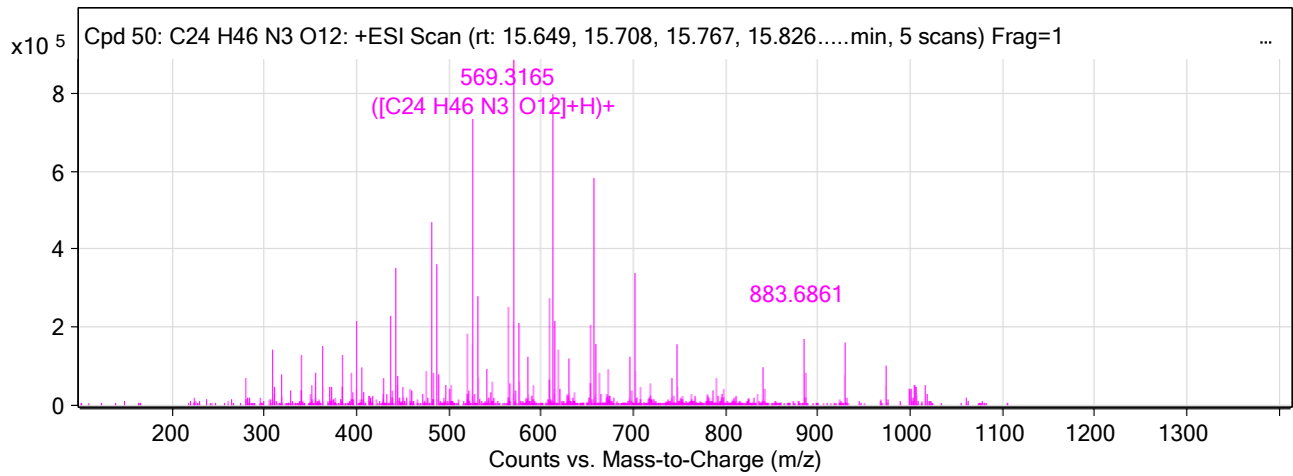

MS Zoomed Spectrum

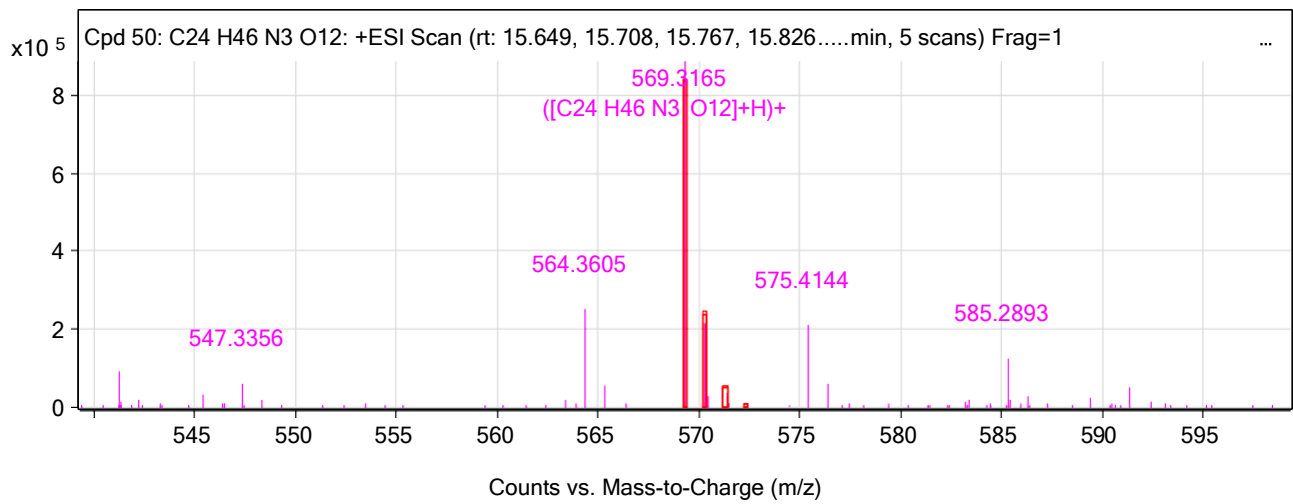

MS Spectrum Peak List

| m/z      | Calc m/z | Diff(ppm) | z | Abund     | Formula                                                        | Ion                |
|----------|----------|-----------|---|-----------|----------------------------------------------------------------|--------------------|
| 443.3355 |          |           | 1 | 353760.66 |                                                                |                    |
| 481.2632 |          |           | 1 | 467767.5  |                                                                |                    |
| 487.362  |          |           | 1 | 360804.44 |                                                                |                    |
| 525.2903 |          |           | 1 | 731222.13 |                                                                |                    |
| 569.3165 | 569.3154 | -1.83     | 1 | 885798.38 | C <sub>24</sub> H <sub>46</sub> N <sub>3</sub> O <sub>12</sub> | (M+H) <sup>+</sup> |
| 570.3191 | 570.3186 | -0.88     | 1 | 212951.97 | C <sub>24</sub> H <sub>46</sub> N <sub>3</sub> O <sub>12</sub> | (M+H) <sup>+</sup> |
| 571.3211 | 571.3209 | -0.31     | 1 | 35697.48  | C <sub>24</sub> H <sub>46</sub> N <sub>3</sub> O <sub>12</sub> | (M+H) <sup>+</sup> |
| 572.3241 | 572.3235 | -0.98     | 1 | 4973.69   | C <sub>24</sub> H <sub>46</sub> N <sub>3</sub> O <sub>12</sub> | (M+H) <sup>+</sup> |
| 613.3429 |          |           | 1 | 793334.38 |                                                                |                    |
| 657.3689 |          |           | 1 | 578116.63 |                                                                |                    |

MSMS Spectrum

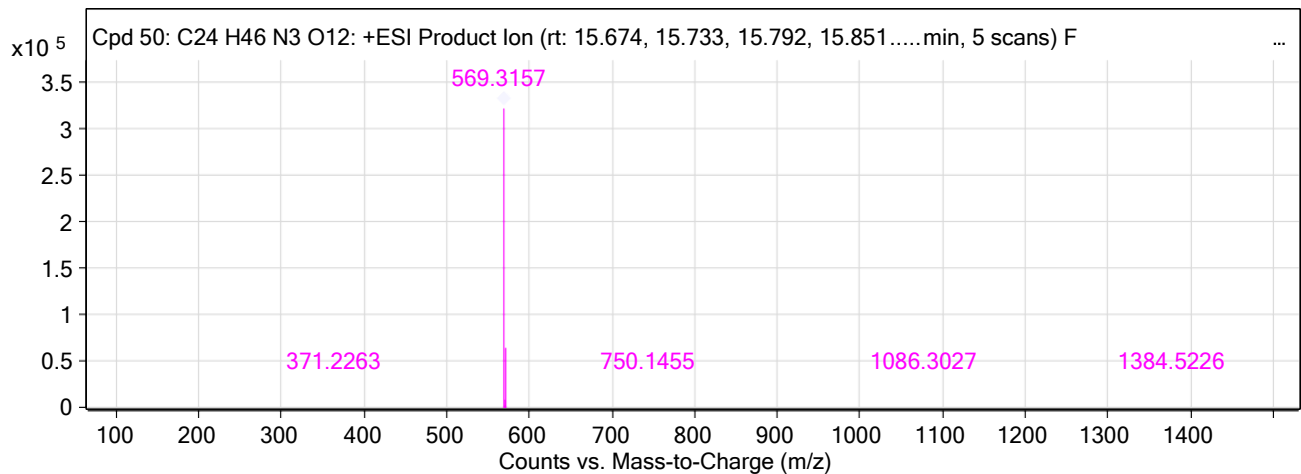

**MS/MS Spectrum Peak List**

| m/z      | Calc m/z | Diff(ppm) | z | Abund     |
|----------|----------|-----------|---|-----------|
| 117.0921 | 117.091  | -9.46     |   | 19.21     |
| 133.0857 | 133.0859 | 1.55      | 1 | 60.26     |
| 177.1114 | 177.1108 | -3.35     |   | 30.96     |
| 195.1221 | 195.1214 | -3.98     |   | 18.6      |
| 309.2802 | 309.2788 | -4.61     |   | 30.04     |
| 328.268  | 328.272  | 12.25     |   | 14.63     |
| 334.1882 | 334.186  | -6.52     |   | 15.42     |
| 371.2263 | 371.2262 | -0.13     | 1 | 59.79     |
| 411.2447 | 411.2463 | 3.89      |   | 19.6      |
| 569.3157 | 569.3154 | -0.44     | 1 | 321618.25 |

| Compound Label      | m/z     | RT     | Algorithm  | Mass     |
|---------------------|---------|--------|------------|----------|
| Cpd 51: C28 H52 O14 | 613.343 | 15.987 | Auto MS/MS | 612.3356 |

**Compound Chromatograms**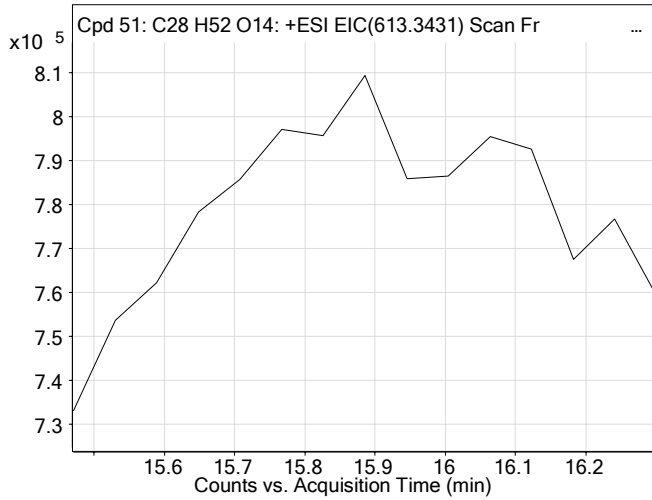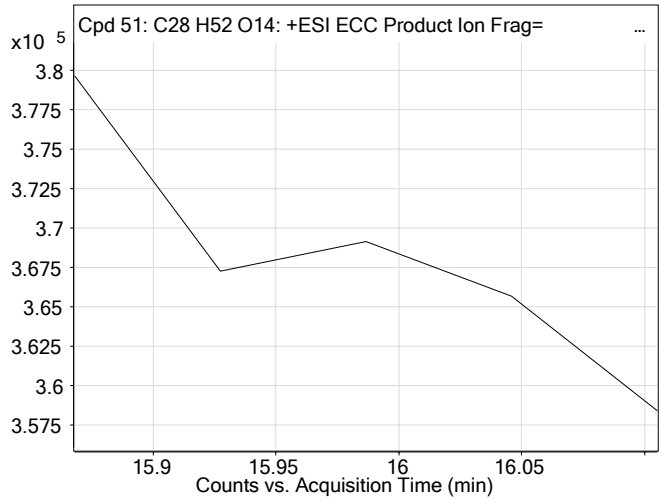

MS Spectrum

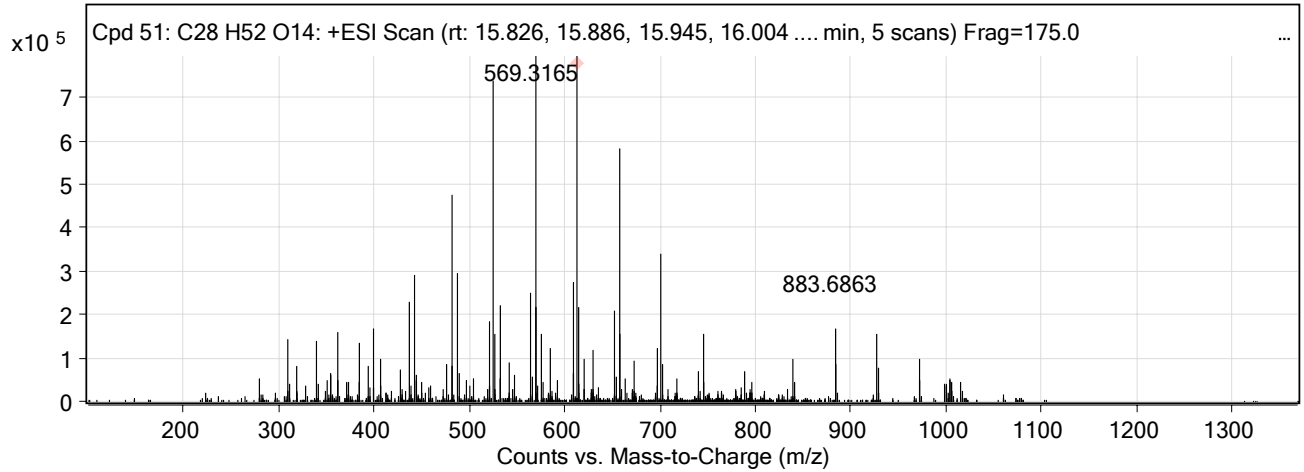

MS Zoomed Spectrum



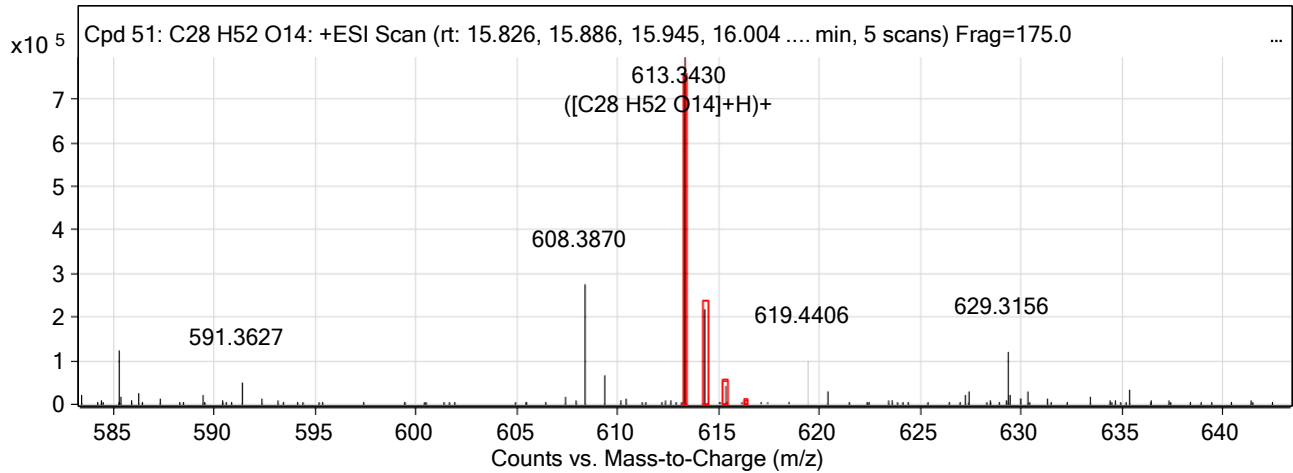

**MS Spectrum Peak List**

| m/z      | Calc m/z | Diff(ppm) | z | Abund     | Formula     | Ion    |
|----------|----------|-----------|---|-----------|-------------|--------|
| 481.2633 |          |           | 1 | 475306.41 |             |        |
| 487.362  |          |           | 1 | 297032.56 |             |        |
| 525.2904 |          |           | 1 | 736537.88 |             |        |
| 569.3165 |          |           | 1 | 890998.69 |             |        |
| 613.343  | 613.343  | -0.09     | 1 | 794630.63 | C28 H52 O14 | (M+H)+ |
| 614.3457 | 614.3464 | 1.21      | 1 | 216073.16 | C28 H52 O14 | (M+H)+ |
| 615.3476 | 615.3489 | 2.1       | 1 | 39191.81  | C28 H52 O14 | (M+H)+ |
| 616.3562 | 616.3515 | -7.62     | 1 | 5441.25   | C28 H52 O14 | (M+H)+ |
| 657.369  |          |           | 1 | 581532.56 |             |        |
| 701.3952 |          |           | 1 | 341566.03 |             |        |

**MSMS Spectrum**

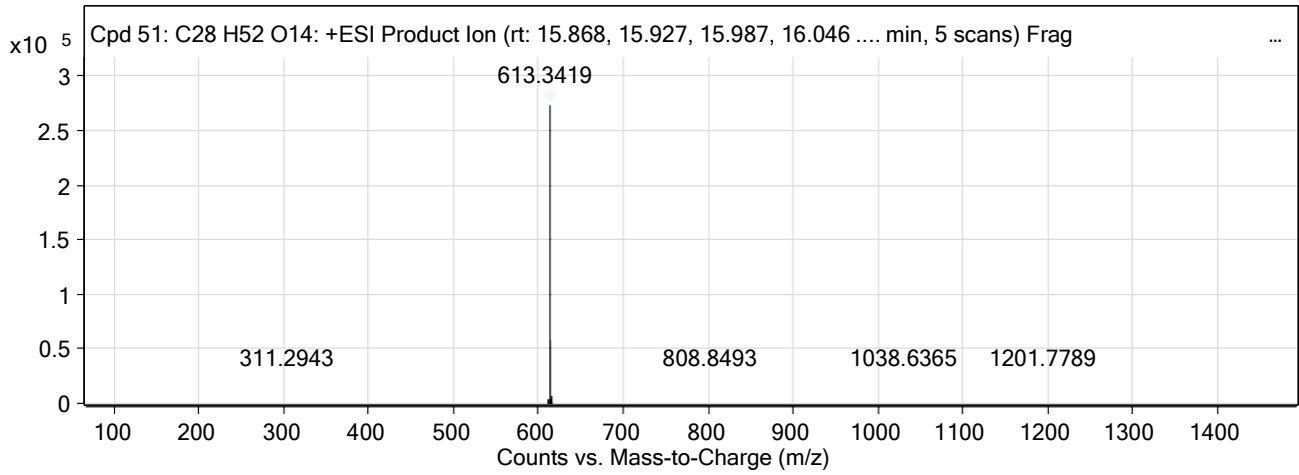

**MS/MS Spectrum Peak List**

| m/z      | Calc m/z | Diff(ppm) | z | Abund     |
|----------|----------|-----------|---|-----------|
| 133.0861 | 133.0859 | -1.49     |   | 92.79     |
| 309.2769 | 309.2788 | 6.26      | 1 | 63.57     |
| 609.3181 | 609.3117 | -10.59    |   | 56.38     |
| 612.3879 |          |           | 2 | 2905.51   |
| 612.6388 |          |           |   | 3381.46   |
| 612.8897 |          |           | 2 | 2849.39   |
| 613.3419 | 613.343  | 1.73      | 1 | 273187.53 |
| 614.3447 |          |           | 1 | 56952.87  |
| 614.4833 |          |           |   | 4237.55   |
| 615.347  |          |           | 1 | 6993.34   |

| Compound Label         | m/z      | RT     | Algorithm  | Mass     |
|------------------------|----------|--------|------------|----------|
| Cpd 52: C24 H46 N3 O12 | 569.3165 | 16.089 | Auto MS/MS | 568.3092 |

**Compound Chromatograms**

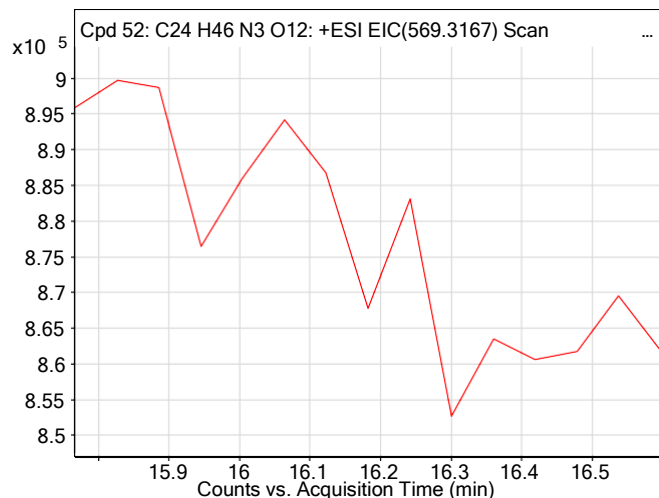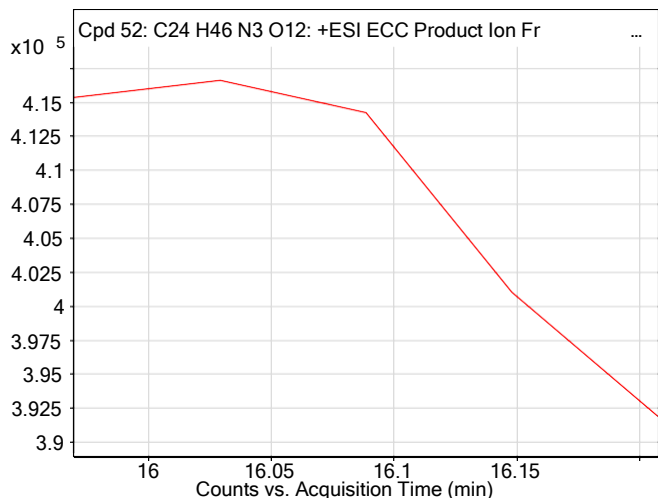

MS Spectrum

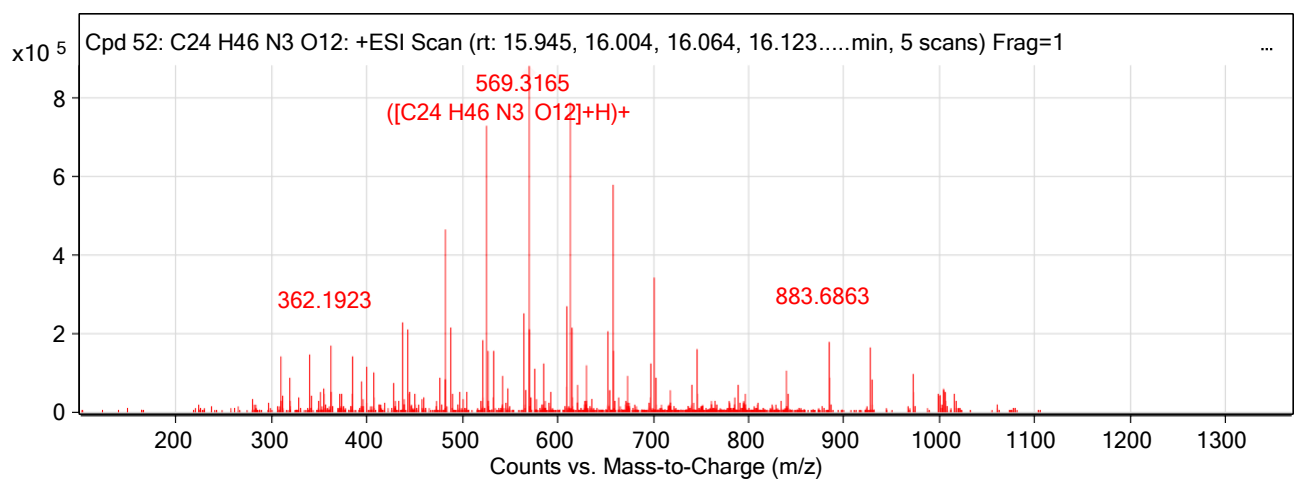

MS Zoomed Spectrum

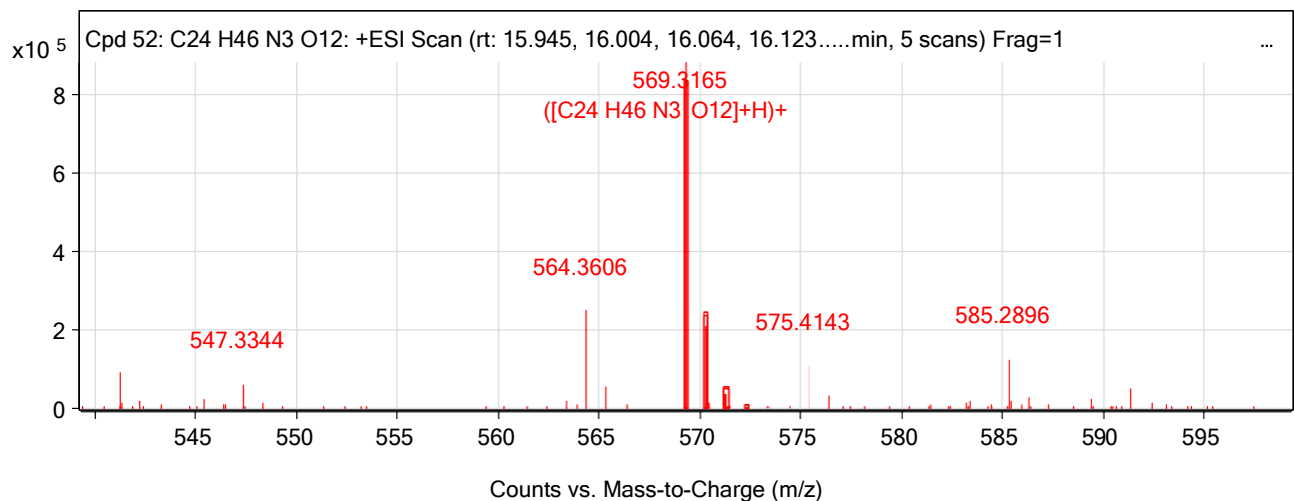

MS Spectrum Peak List

| m/z      | Calc m/z | Diff(ppm) | z | Abund     | Formula        | Ion    |
|----------|----------|-----------|---|-----------|----------------|--------|
| 481.2634 |          |           | 1 | 462339.84 |                |        |
| 525.2904 |          |           | 1 | 727025.63 |                |        |
| 569.3165 | 569.3154 | -1.96     | 1 | 882234.88 | C24 H46 N3 O12 | (M+H)+ |
| 570.3192 | 570.3186 | -1.13     | 1 | 211549.2  | C24 H46 N3 O12 | (M+H)+ |
| 571.3214 | 571.3209 | -0.85     | 1 | 35876.45  | C24 H46 N3 O12 | (M+H)+ |
| 572.3243 | 572.3235 | -1.29     | 1 | 5218.18   | C24 H46 N3 O12 | (M+H)+ |
| 608.387  |          |           | 1 | 269149.22 |                |        |
| 613.3431 |          |           | 1 | 785671.31 |                |        |

MSMS Spectrum

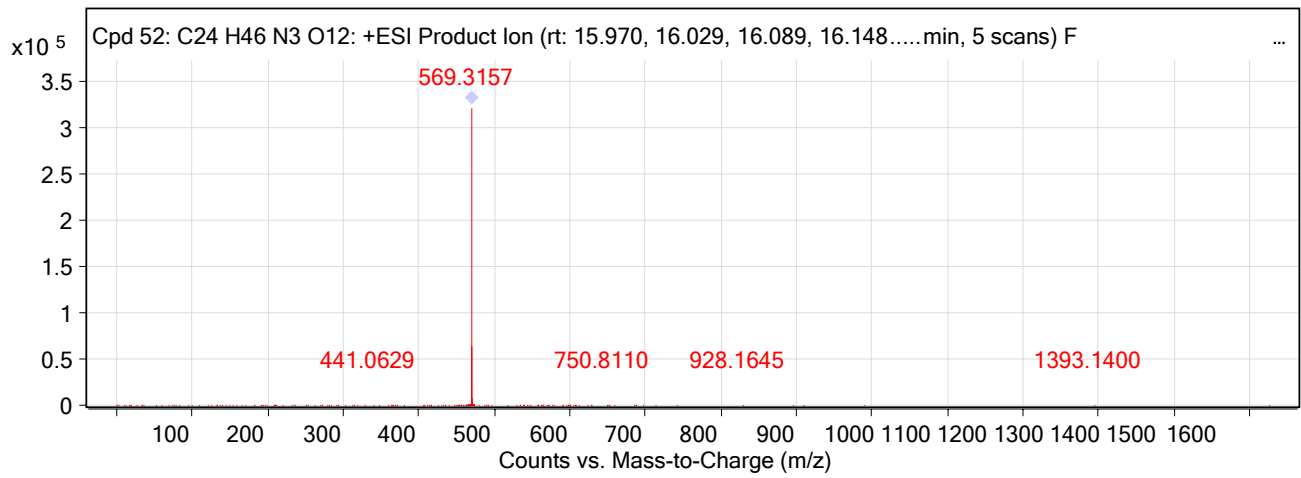

MS/MS Spectrum PeakList

| m/z      | Calc m/z | Diff(ppm) | z | Abund     |
|----------|----------|-----------|---|-----------|
| 101.0959 | 101.0961 | 1.77      |   | 18.97     |
| 133.0869 | 133.0859 | -7.13     |   | 33.16     |
| 151.0972 | 151.0992 | 12.87     |   | 26.14     |
| 309.2779 | 309.2775 | -1.54     | 1 | 30.63     |
| 370.233  | 370.2336 | 1.74      |   | 18.53     |
| 371.2258 | 371.2262 | 1.12      |   | 31.85     |
| 372.2323 | 372.234  | 4.66      |   | 25.81     |
| 394.2611 | 394.2561 | -12.51    |   | 17.25     |
| 566.2904 | 283.1457 | -499999.1 | 2 | 25.23     |
| 569.3157 | 569.3154 | -0.57     | 1 | 321031.28 |

| Compound Label      | m/z      | RT     | Algorithm  | Mass     |
|---------------------|----------|--------|------------|----------|
| Cpd 53: C28 H52 O14 | 613.3432 | 16.283 | Auto MS/MS | 612.3357 |

Compound Chromatograms

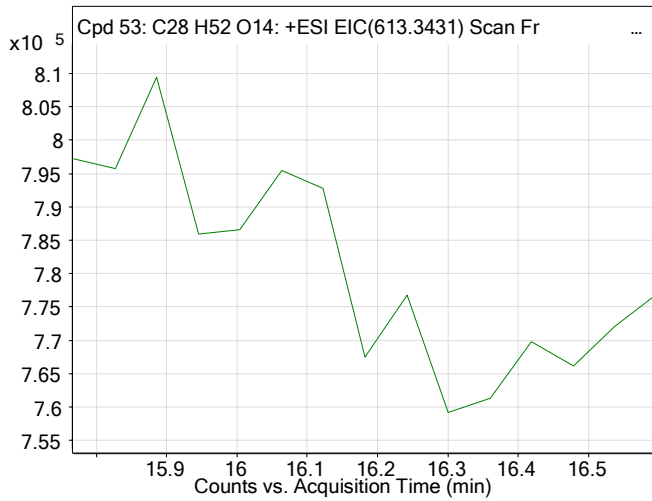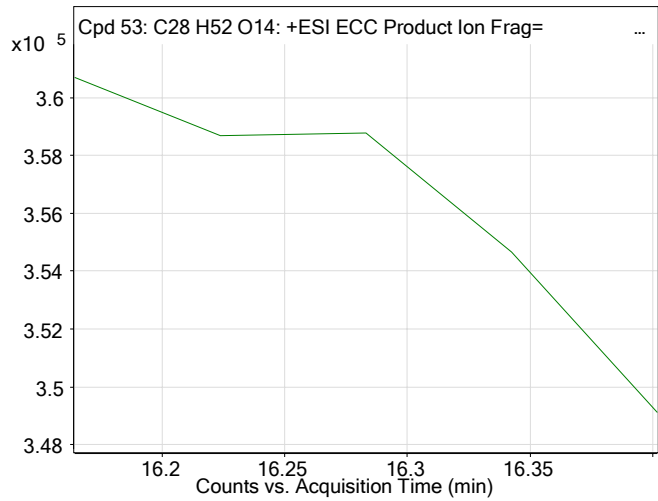

MS Spectrum

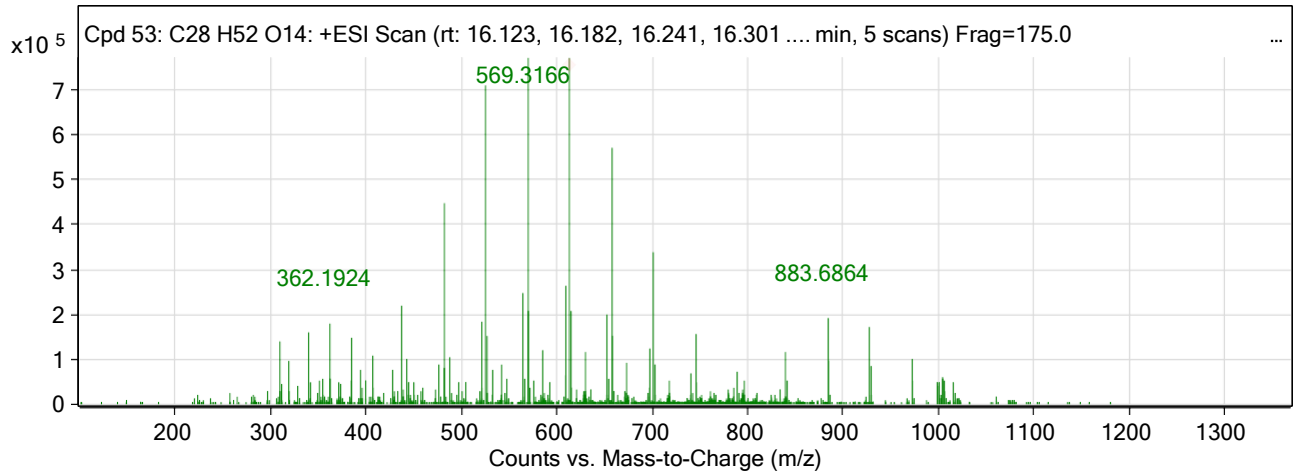

MS Zoomed Spectrum

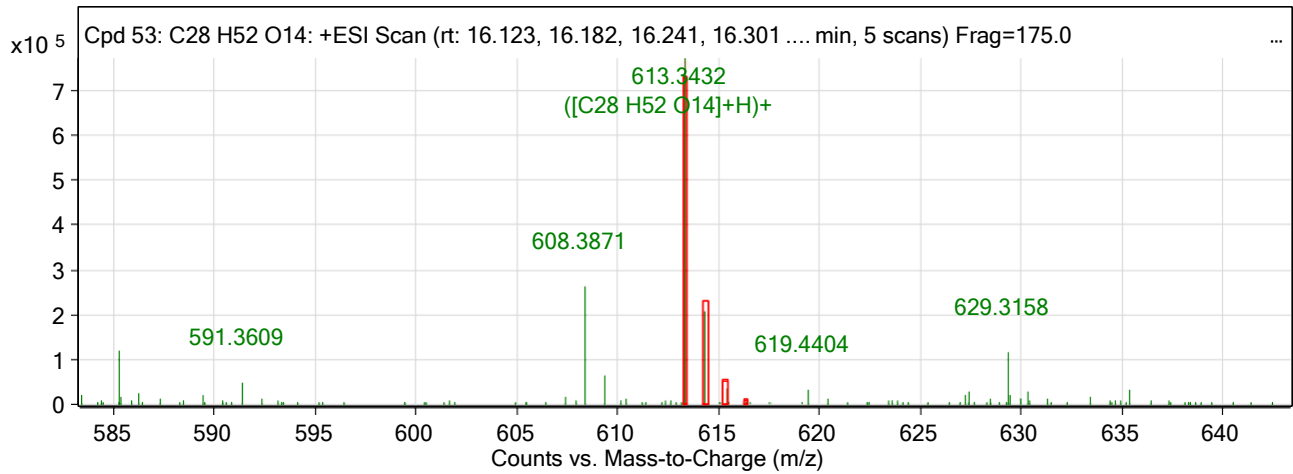

MS Spectrum Peak List

| m/z      | Calc m/z | Diff(ppm) | z | Abund     | Formula     | Ion    |
|----------|----------|-----------|---|-----------|-------------|--------|
| 481.2634 |          |           | 1 | 445991    |             |        |
| 525.2905 |          |           | 1 | 708394.5  |             |        |
| 569.3166 |          |           | 1 | 870778.69 |             |        |
| 608.3871 |          |           | 1 | 263772.59 |             |        |
| 613.3432 | 613.343  | -0.28     | 1 | 771518.06 | C28 H52 O14 | (M+H)+ |
| 614.3457 | 614.3464 | 1.21      | 1 | 209016.72 | C28 H52 O14 | (M+H)+ |
| 615.3478 | 615.3489 | 1.78      | 1 | 37182.54  | C28 H52 O14 | (M+H)+ |
| 616.3557 | 616.3515 | -6.72     | 1 | 5346.43   | C28 H52 O14 | (M+H)+ |
| 657.3692 |          |           | 1 | 568138.38 |             |        |
| 701.3952 |          |           | 1 | 336483.91 |             |        |

MSMS Spectrum

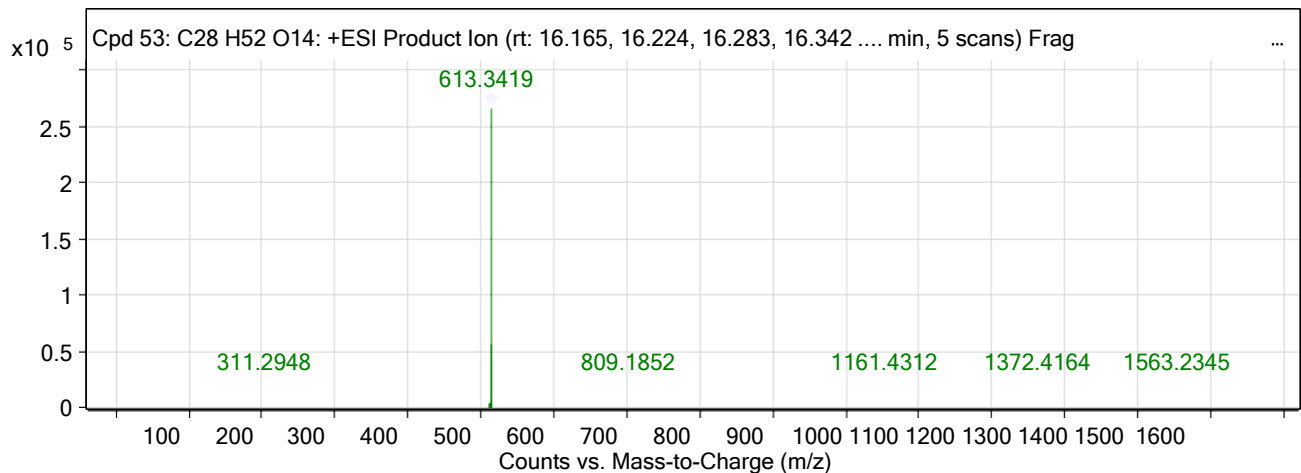

**MS/MS Spectrum Peak List**

| m/z      | Calc m/z | Diff(ppm) | z | Abund    |
|----------|----------|-----------|---|----------|
| 133.0876 | 133.0859 | -12.63    | 1 | 90.7     |
| 309.2791 | 309.2788 | -1.03     | 1 | 59.55    |
| 612.3877 |          |           | 2 | 2841.78  |
| 612.6387 |          |           |   | 3837.07  |
| 612.8895 |          |           | 2 | 3112.13  |
| 613.1408 |          |           | 1 | 1445.73  |
| 613.3419 | 613.343  | 1.74      | 1 | 26548.59 |
| 614.3447 |          |           | 1 | 55271.11 |
| 615.1403 |          |           | 1 | 1147.04  |
| 615.347  |          |           | 1 | 7179.27  |

| Compound Label         | m/z      | RT     | Algorithm  | Mass     |
|------------------------|----------|--------|------------|----------|
| Cpd 54: C24 H46 N3 O12 | 569.3167 | 16.385 | Auto MS/MS | 568.3093 |

**Compound Chromatograms**

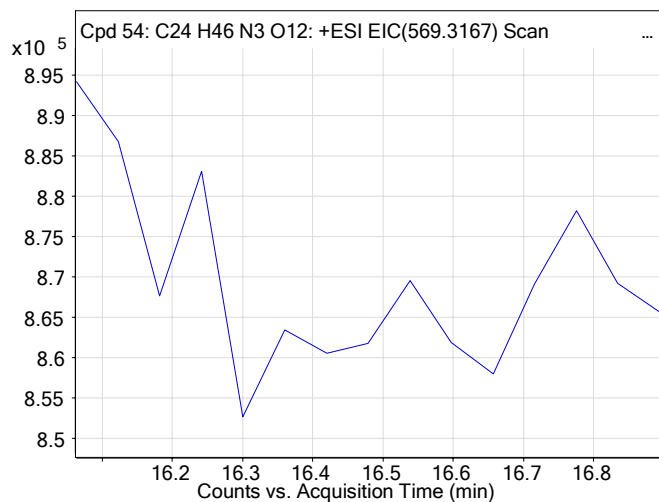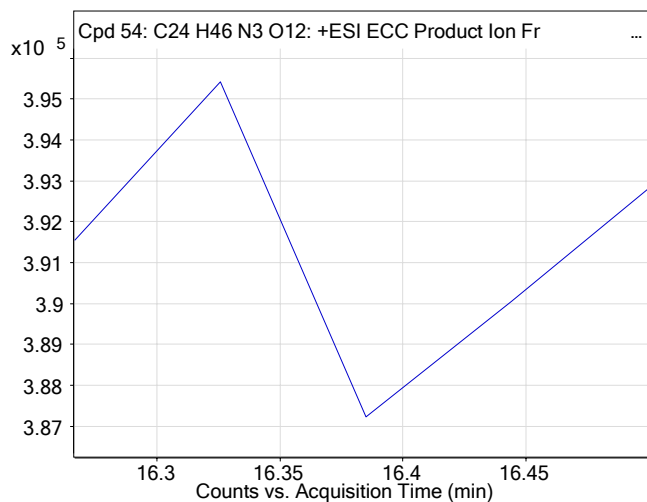

MS Spectrum

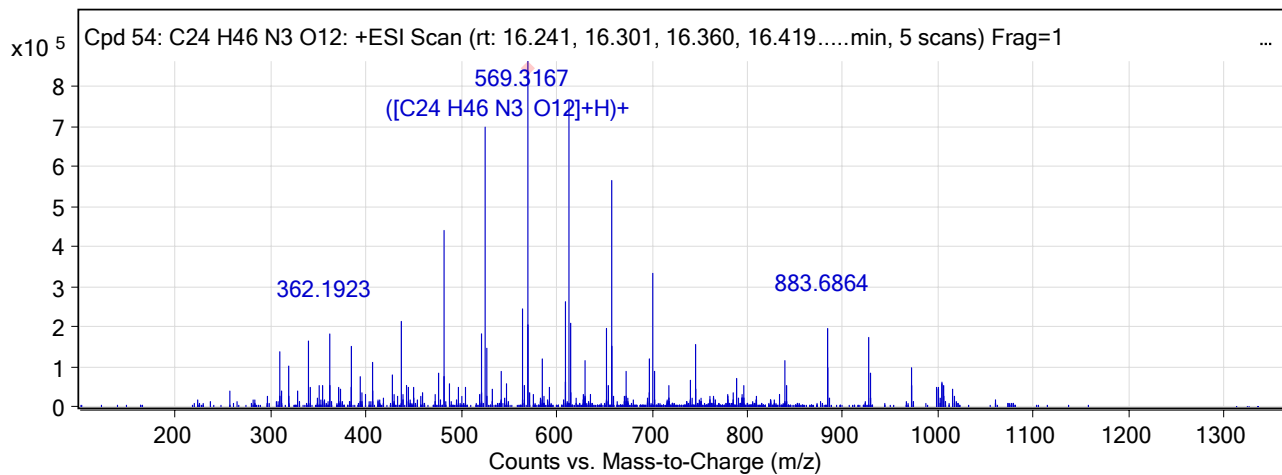

MS Zoomed Spectrum

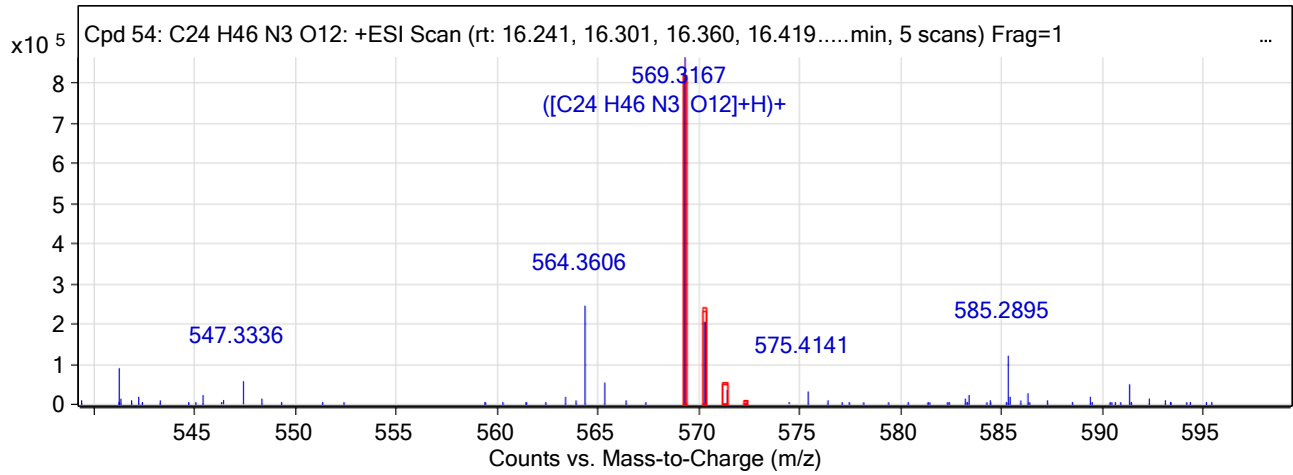

**MS Spectrum Peak List**

| m/z      | Calc m/z | Diff(ppm) | z | Abund     | Formula                                                        | Ion                |
|----------|----------|-----------|---|-----------|----------------------------------------------------------------|--------------------|
| 481.2633 |          |           | 1 | 439920.75 |                                                                |                    |
| 525.2905 |          |           | 1 | 701579.63 |                                                                |                    |
| 569.3167 | 569.3154 | -2.19     | 1 | 864348.13 | C <sub>24</sub> H <sub>46</sub> N <sub>3</sub> O <sub>12</sub> | (M+H) <sup>+</sup> |
| 570.3192 | 570.3186 | -1.13     | 1 | 205308.03 | C <sub>24</sub> H <sub>46</sub> N <sub>3</sub> O <sub>12</sub> | (M+H) <sup>+</sup> |
| 571.3213 | 571.3209 | -0.6      | 1 | 34019.66  | C <sub>24</sub> H <sub>46</sub> N <sub>3</sub> O <sub>12</sub> | (M+H) <sup>+</sup> |
| 572.3245 | 572.3235 | -1.69     | 1 | 4779.05   | C <sub>24</sub> H <sub>46</sub> N <sub>3</sub> O <sub>12</sub> | (M+H) <sup>+</sup> |
| 608.387  |          |           | 1 | 264480.69 |                                                                |                    |
| 613.3431 |          |           | 1 | 76640.69  |                                                                |                    |
| 657.3691 |          |           | 1 | 565226.31 |                                                                |                    |
| 701.3952 |          |           | 1 | 335125.47 |                                                                |                    |

MSMS Spectrum

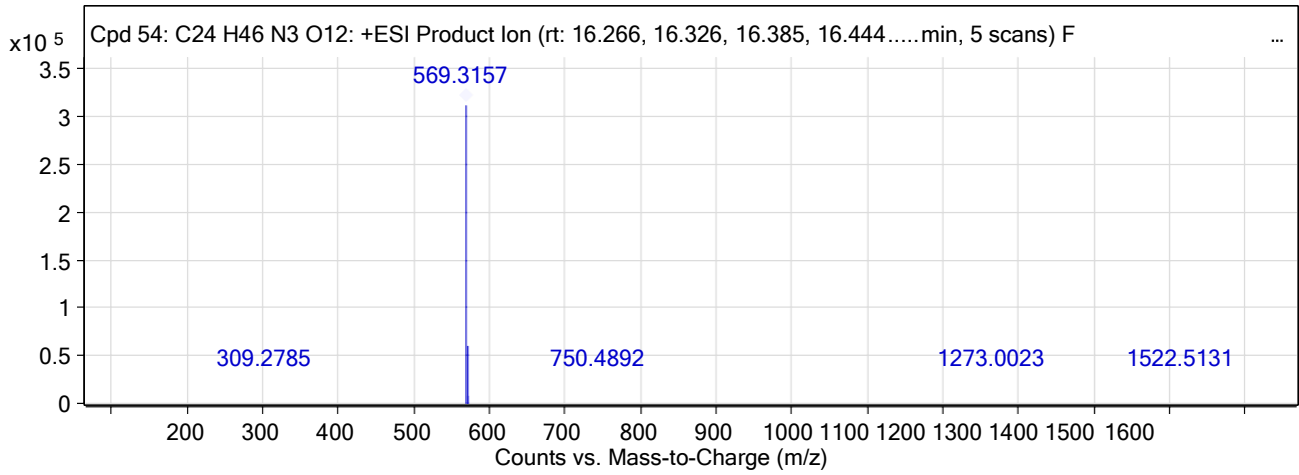

**MS/MS Spectrum Peak List**

| m/z      | Calc m/z | Diff(ppm) | z | Abund     |
|----------|----------|-----------|---|-----------|
| 151.0976 | 151.0992 | 10.29     |   | 15.02     |
| 175.1345 | 175.1356 | 5.73      |   | 17.34     |
| 177.1113 | 177.1108 | -3.04     |   | 18.63     |
| 210.119  | 210.121  | 9.84      |   | 15.11     |
| 275.1594 | 275.1601 | 2.54      |   | 14.19     |
| 309.2785 | 309.2788 | 1.08      |   | 47.83     |
| 336.2169 | 336.2143 | -8.01     |   | 13.44     |
| 371.2259 | 371.2262 | 0.86      |   | 43.66     |
| 428.257  | 428.2603 | 7.5       |   | 12.42     |
| 569.3157 | 569.3154 | -0.44     | 1 | 311949.34 |

| Compound Label                                                         | m/z      | RT    | Algorithm  | Mass     |
|------------------------------------------------------------------------|----------|-------|------------|----------|
| Cpd 55: C <sub>26</sub> H <sub>50</sub> N <sub>3</sub> O <sub>13</sub> | 613.3428 | 16.58 | Auto MS/MS | 612.3354 |

**Compound Chromatograms**

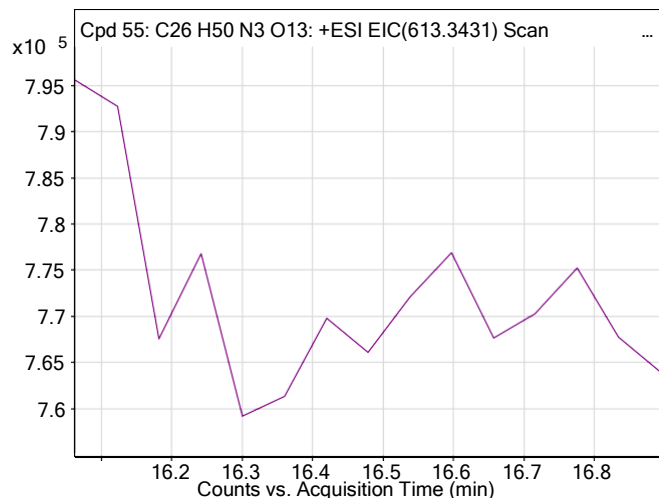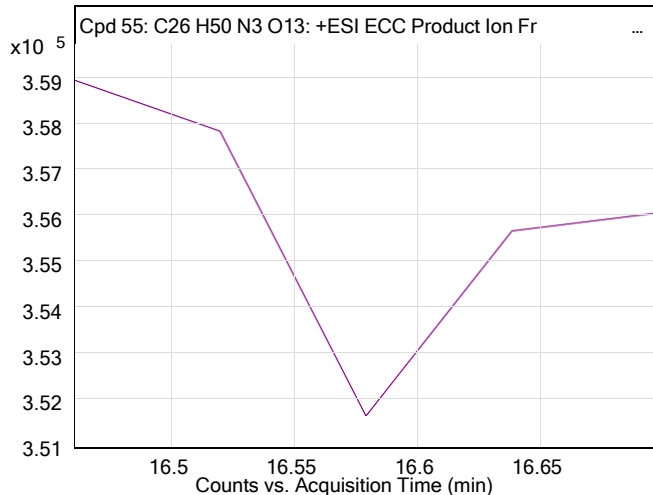

MS Spectrum

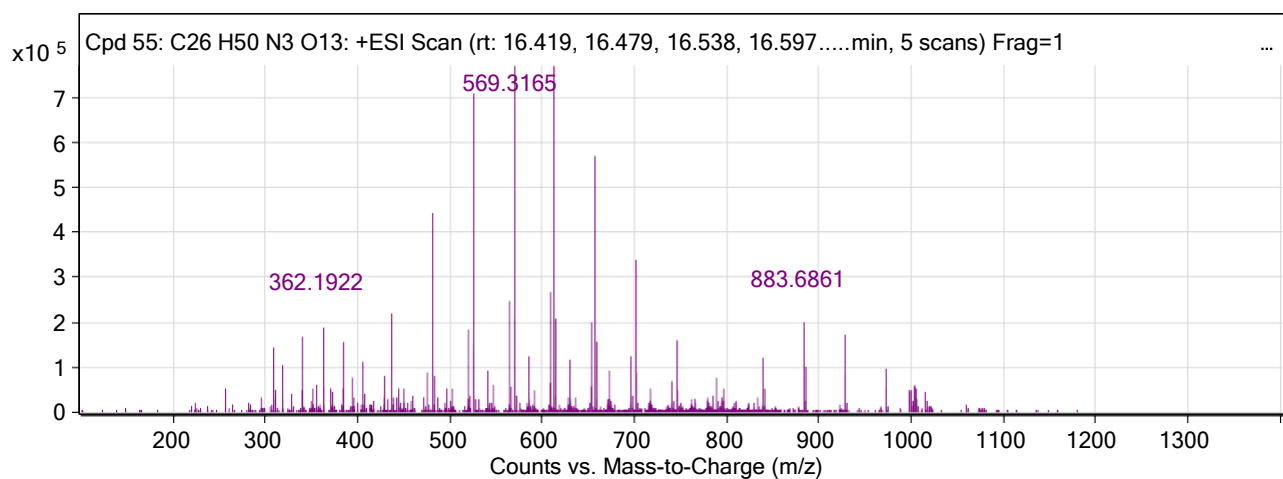

MS Zoomed Spectrum

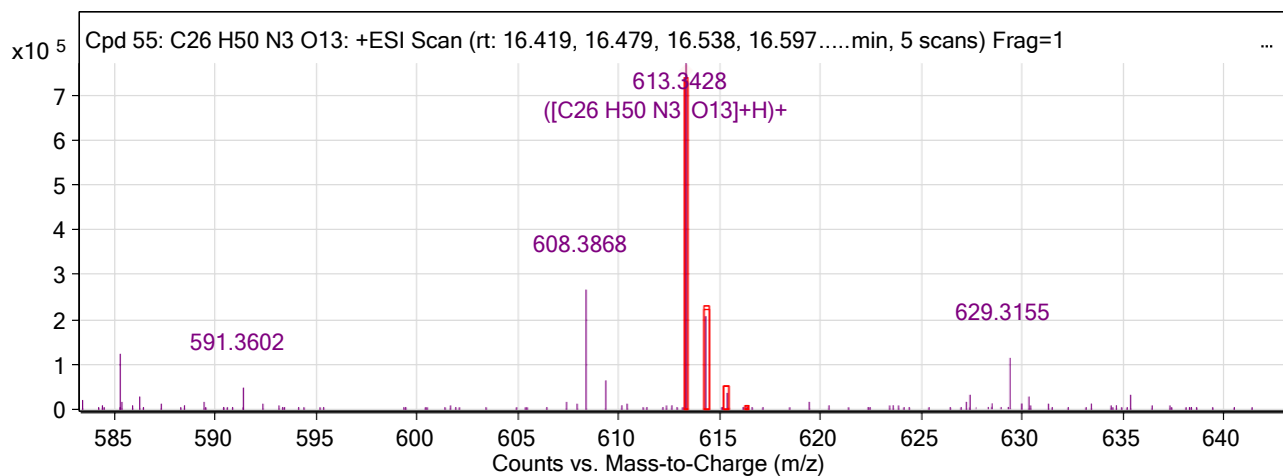

MS Spectrum Peak List

| m/z      | Calc m/z | Diff(ppm) | z | Abund     | Formula                                                        | Ion    |
|----------|----------|-----------|---|-----------|----------------------------------------------------------------|--------|
| 481.2632 |          |           | 1 | 441840.56 |                                                                |        |
| 525.2903 |          |           | 1 | 708574.19 |                                                                |        |
| 569.3165 |          |           | 1 | 862372.38 |                                                                |        |
| 608.3868 |          |           | 1 | 266458.53 |                                                                |        |
| 613.3428 | 613.3416 | -1.94     | 1 | 770506.81 | C <sub>26</sub> H <sub>50</sub> N <sub>3</sub> O <sub>13</sub> | (M+H)+ |
| 614.3454 | 614.3448 | -0.91     | 1 | 207956.61 | C <sub>26</sub> H <sub>50</sub> N <sub>3</sub> O <sub>13</sub> | (M+H)+ |
| 615.3475 | 615.3472 | -0.46     | 1 | 37503.39  | C <sub>26</sub> H <sub>50</sub> N <sub>3</sub> O <sub>13</sub> | (M+H)+ |
| 616.3576 | 616.3498 | -12.59    | 1 | 5637.1    | C <sub>26</sub> H <sub>50</sub> N <sub>3</sub> O <sub>13</sub> | (M+H)+ |
| 657.3689 |          |           | 1 | 568562    |                                                                |        |

MSMS Spectrum

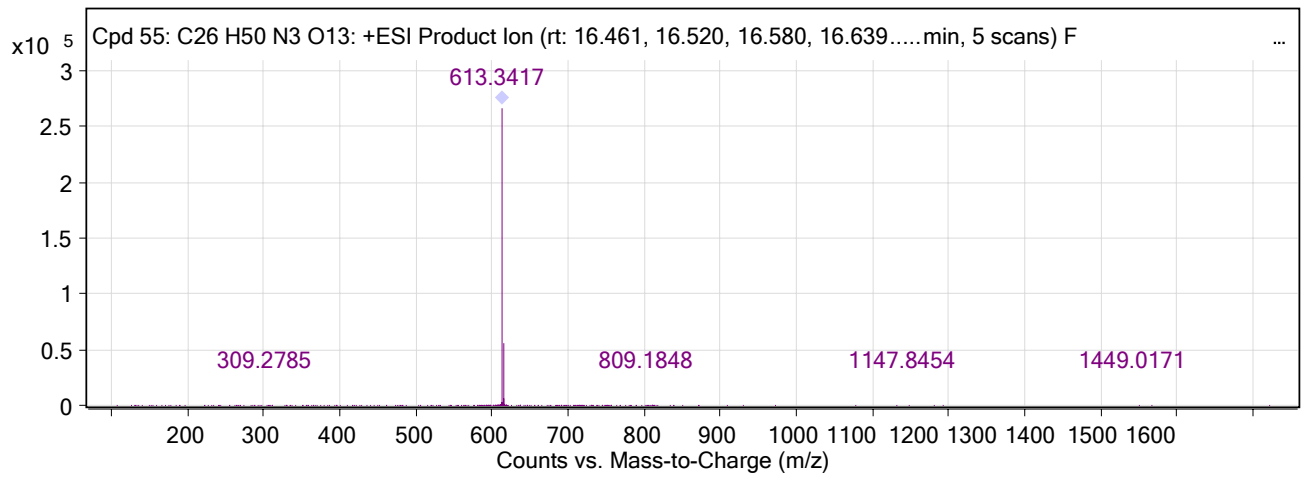

MS/MS Spectrum Peak List

| m/z      | Calc m/z | Diff(ppm) | z | Abund     |
|----------|----------|-----------|---|-----------|
| 133.0863 | 133.0859 | -2.9      | 1 | 50.93     |
| 195.1217 | 195.1214 | -1.62     |   | 43.47     |
| 309.2785 | 309.2788 | 0.91      | 1 | 96.8      |
| 355.0704 | 355.0745 | 11.51     |   | 32.52     |
| 357.0716 | 357.0664 | -14.66    |   | 32.16     |
| 612.6379 |          |           |   | 3868.05   |
| 612.8889 |          |           | 2 | 2943.66   |
| 613.3417 | 613.3416 | -0.09     | 1 | 266878.38 |
| 614.3444 |          |           | 1 | 56055.98  |
| 615.3467 |          |           | 1 | 6833.52   |

| Compound Label         | m/z      | RT     | Algorithm  | Mass     |
|------------------------|----------|--------|------------|----------|
| Cpd 56: C24 H46 N3 O12 | 569.3166 | 16.682 | Auto MS/MS | 568.3092 |

Compound Chromatograms

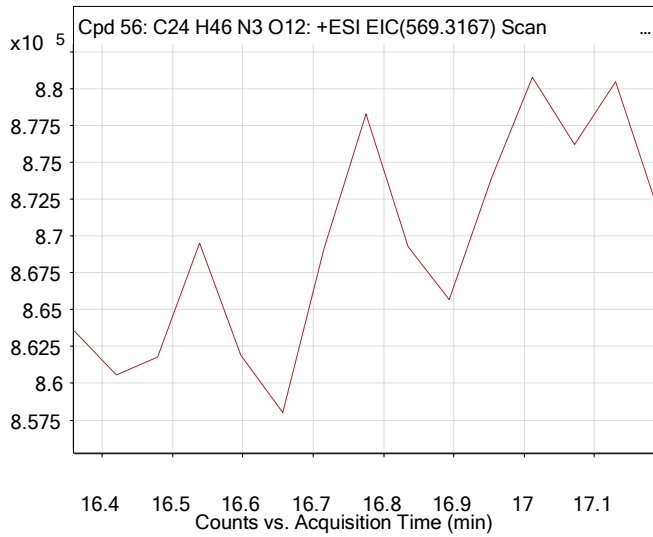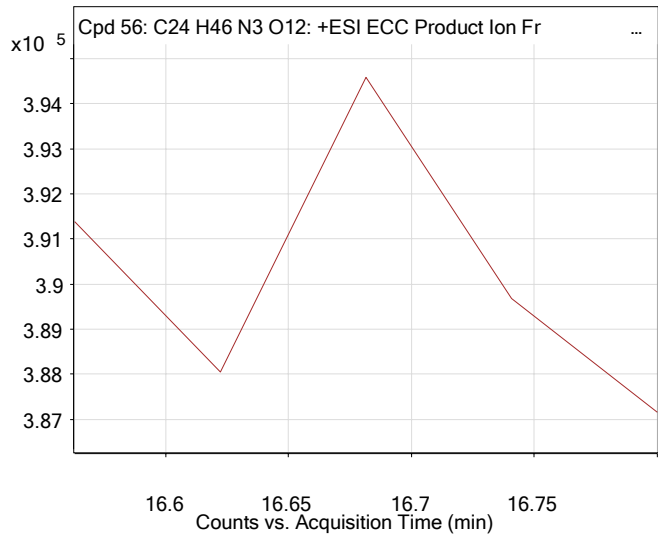

MS Spectrum



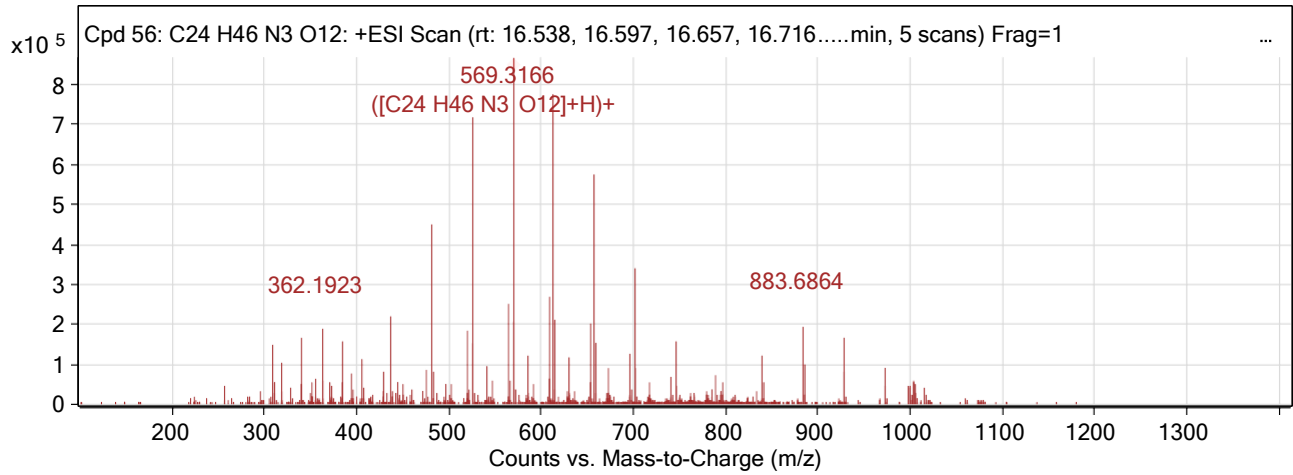

MS Zoomed Spectrum

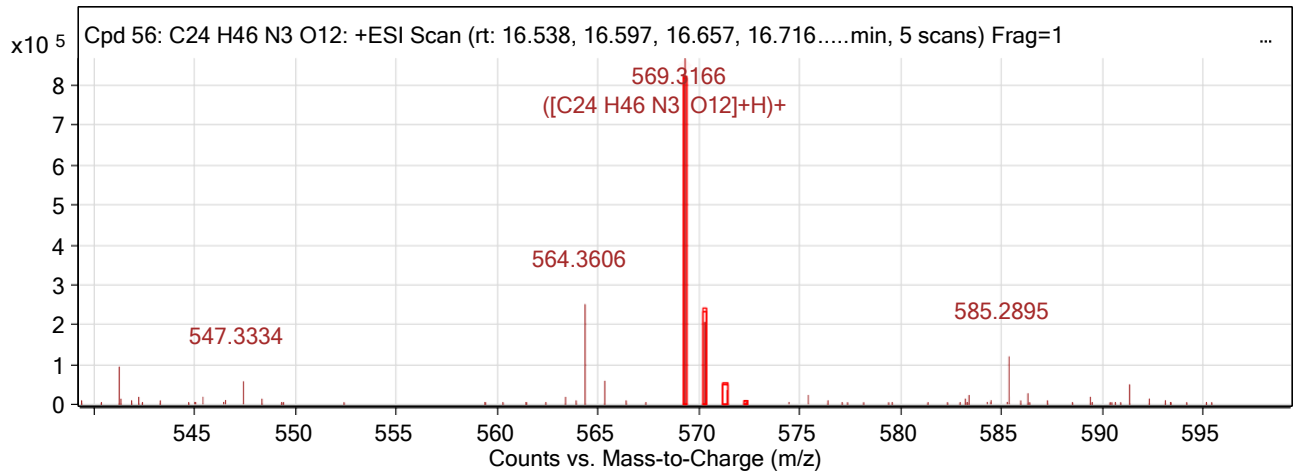

MS Spectrum Peak List

| m/z      | Calc m/z | Diff(ppm) | z | Abund     | Formula                                                        | Ion                |
|----------|----------|-----------|---|-----------|----------------------------------------------------------------|--------------------|
| 481.2633 |          |           | 1 | 446834.34 |                                                                |                    |
| 525.2904 |          |           | 1 | 715784.5  |                                                                |                    |
| 569.3166 | 569.3154 | -2.1      | 1 | 867385.69 | C <sub>24</sub> H <sub>46</sub> N <sub>3</sub> O <sub>12</sub> | (M+H) <sup>+</sup> |
| 570.3193 | 570.3186 | -1.15     | 1 | 207230.66 | C <sub>24</sub> H <sub>46</sub> N <sub>3</sub> O <sub>12</sub> | (M+H) <sup>+</sup> |
| 571.3212 | 571.3209 | -0.53     | 1 | 34627.9   | C <sub>24</sub> H <sub>46</sub> N <sub>3</sub> O <sub>12</sub> | (M+H) <sup>+</sup> |
| 572.3239 | 572.3235 | -0.72     | 1 | 4742.23   | C <sub>24</sub> H <sub>46</sub> N <sub>3</sub> O <sub>12</sub> | (M+H) <sup>+</sup> |
| 608.387  |          |           | 1 | 268516.19 |                                                                |                    |
| 613.343  |          |           | 1 | 772425.63 |                                                                |                    |
| 657.369  |          |           | 1 | 571057.38 |                                                                |                    |
| 701.3951 |          |           | 1 | 340615.28 |                                                                |                    |

MSMS Spectrum

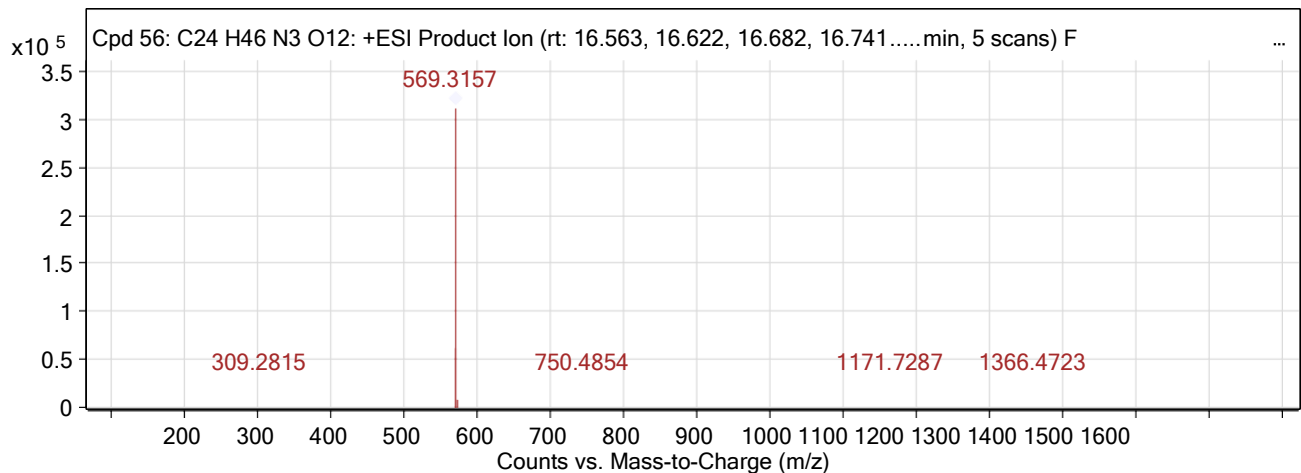

**MS/MS Spectrum Peak List**

| m/z      | Calc m/z | Diff(ppm) | z | Abund     |
|----------|----------|-----------|---|-----------|
| 117.0908 | 117.091  | 1.79      |   | 19.67     |
| 133.0866 | 133.0859 | -5.18     |   | 43.77     |
| 175.1316 | 175.1315 | -0.55     |   | 21.81     |
| 177.1115 | 177.1121 | 3.77      |   | 24.92     |
| 307.1738 | 307.1738 | -0.18     |   | 16.73     |
| 309.2815 | 309.2788 | -8.75     |   | 43.76     |
| 311.2912 | 311.2931 | 6.17      |   | 23.91     |
| 407.2553 | 407.2514 | -9.66     |   | 21.2      |
| 440.2926 | 440.2966 | 9.27      |   | 17.08     |
| 569.3157 | 569.3154 | -0.53     | 1 | 311193.66 |

| Compound Label      | m/z      | RT     | Algorithm  | Mass     |
|---------------------|----------|--------|------------|----------|
| Cpd 57: C28 H52 O14 | 613.3431 | 16.876 | Auto MS/MS | 612.3356 |

**Compound Chromatograms**

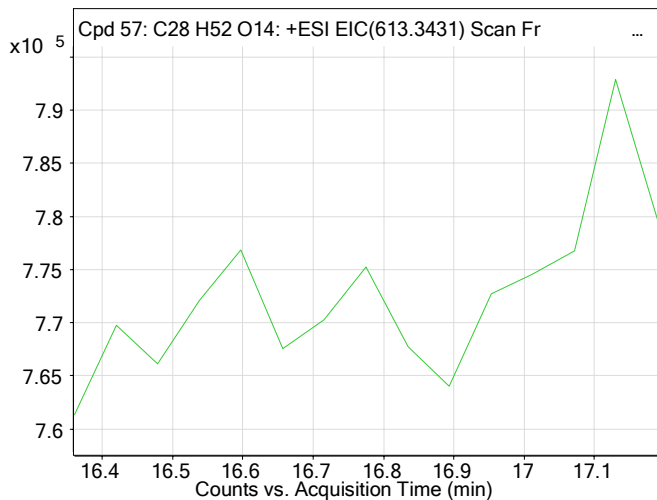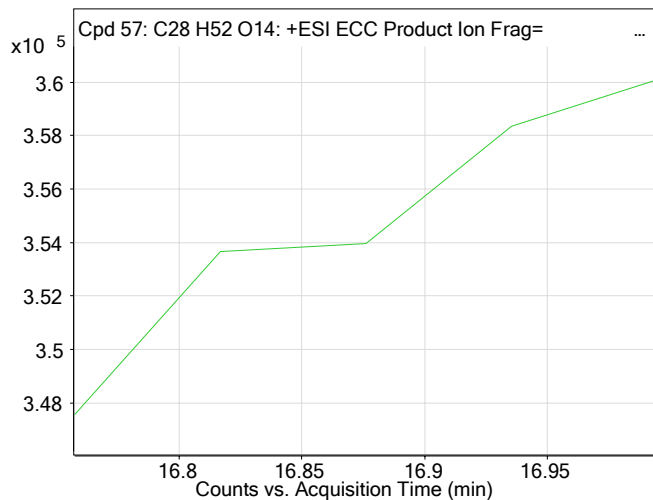

**MS Spectrum**

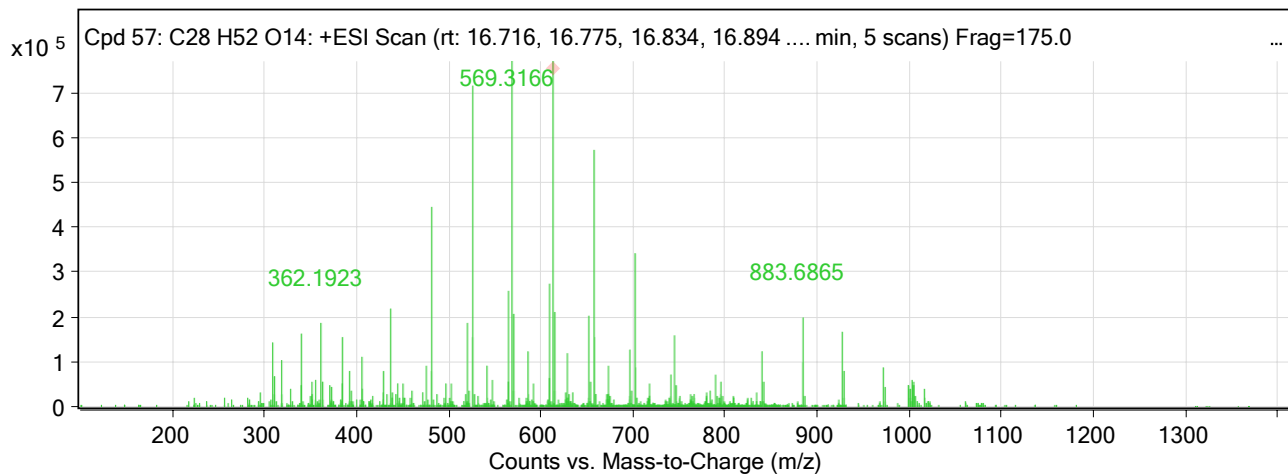

**MS Zoomed Spectrum**

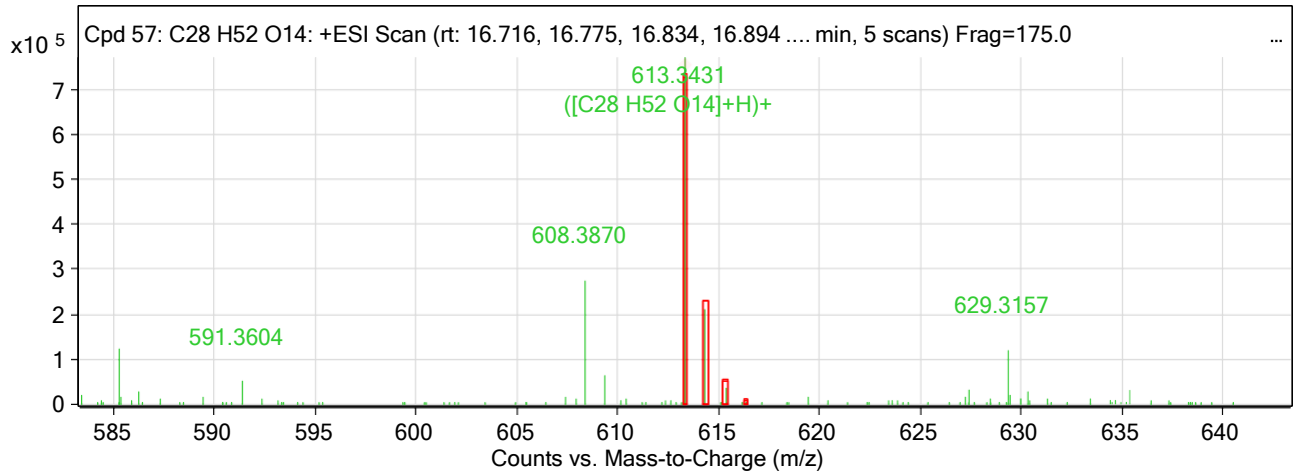

**MS Spectrum Peak List**

| m/z      | Calc m/z | Diff(ppm) | z | Abund     | Formula     | Ion    |
|----------|----------|-----------|---|-----------|-------------|--------|
| 481.2634 |          |           | 1 | 445857.59 |             |        |
| 525.2905 |          |           | 1 | 712815.94 |             |        |
| 569.3166 |          |           | 1 | 871255.69 |             |        |
| 608.387  |          |           | 1 | 275386.69 |             |        |
| 613.3431 | 613.343  | -0.2      | 1 | 769988.44 | C28 H52 O14 | (M+H)+ |
| 614.3456 | 614.3464 | 1.24      | 1 | 209893.92 | C28 H52 O14 | (M+H)+ |
| 615.3477 | 615.3489 | 1.83      | 1 | 37577.42  | C28 H52 O14 | (M+H)+ |
| 616.3573 | 616.3515 | -9.4      | 1 | 5363.75   | C28 H52 O14 | (M+H)+ |
| 657.3691 |          |           | 1 | 571644.88 |             |        |
| 701.3952 |          |           | 1 | 340682.06 |             |        |

**MS/MS Spectrum**

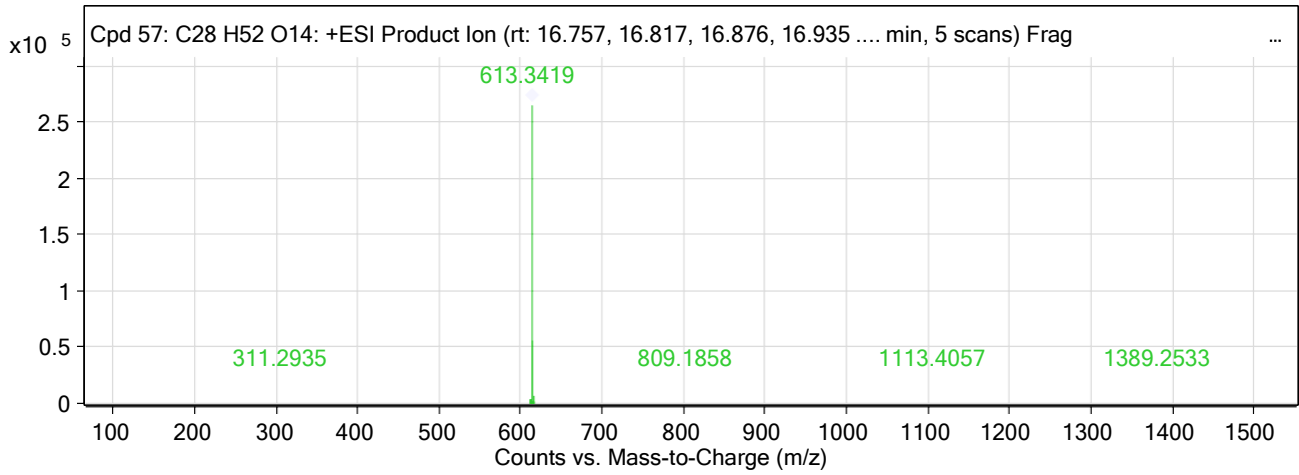

**MS/MS Spectrum Peak List**

| m/z      | Calc m/z | Diff(ppm) | z | Abund     |
|----------|----------|-----------|---|-----------|
| 133.0856 | 133.0859 | 2.06      |   | 63.59     |
| 309.2779 | 309.2788 | 2.99      |   | 69.53     |
| 311.2935 | 311.2945 | 3.14      | 1 | 97.24     |
| 612.3879 |          |           | 2 | 2679.64   |
| 612.638  |          |           |   | 3727.46   |
| 612.8889 |          |           | 2 | 2685.04   |
| 613.1409 |          |           | 1 | 1585.42   |
| 613.3419 | 613.343  | 1.83      | 1 | 265174.97 |
| 614.3446 |          |           | 1 | 56028.04  |
| 615.3469 |          |           | 1 | 6935.85   |

| Compound Label         | m/z      | RT     | Algorithm  | Mass     |
|------------------------|----------|--------|------------|----------|
| Cpd 58: C24 H46 N3 O12 | 569.3165 | 16.978 | Auto MS/MS | 568.3091 |

**Compound Chromatograms**

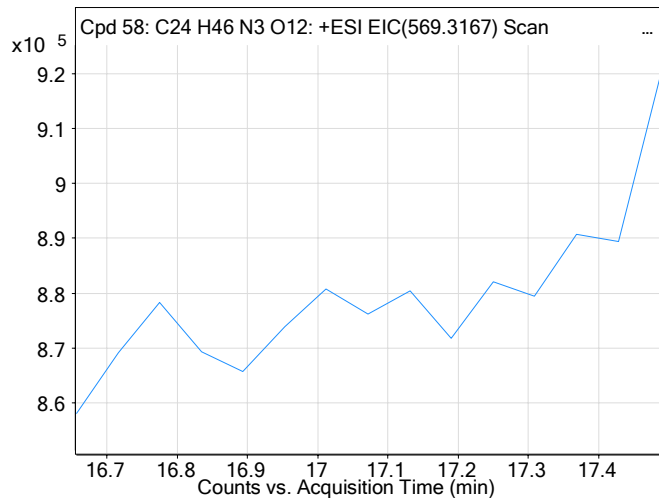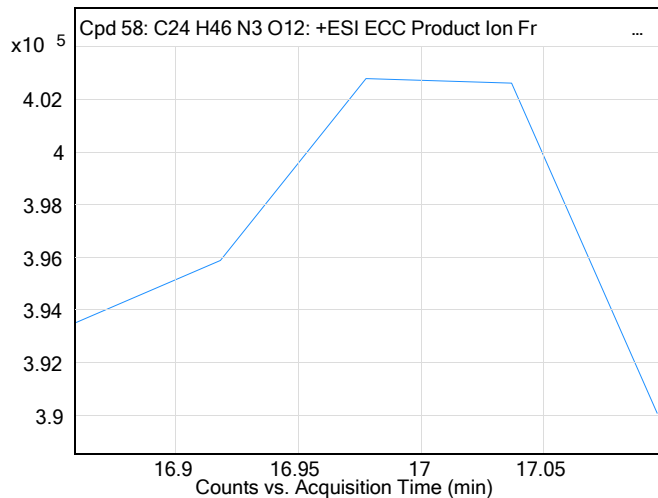

MS Spectrum

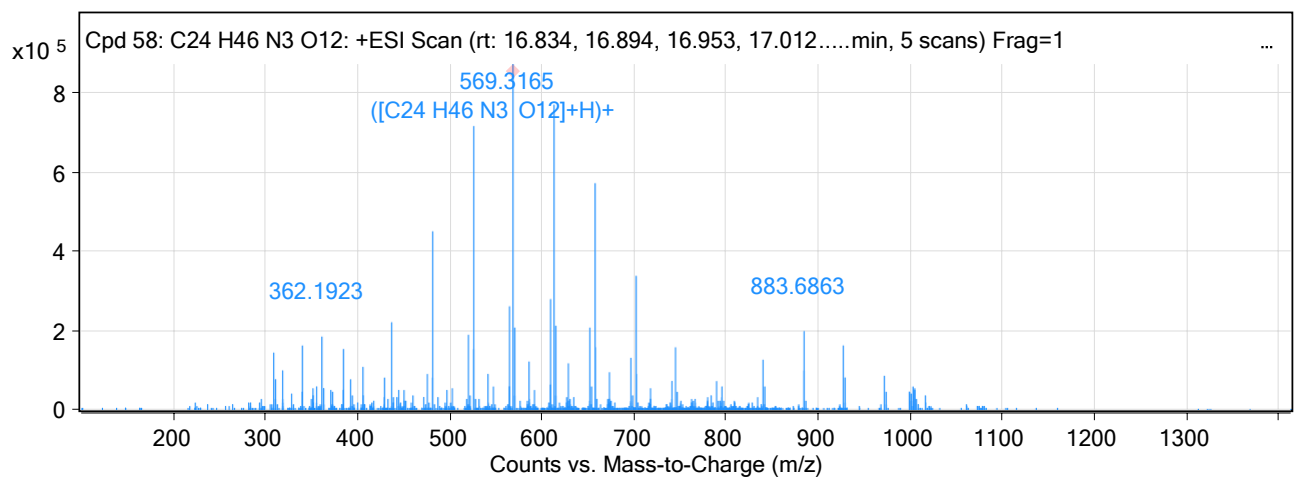

MS Zoomed Spectrum

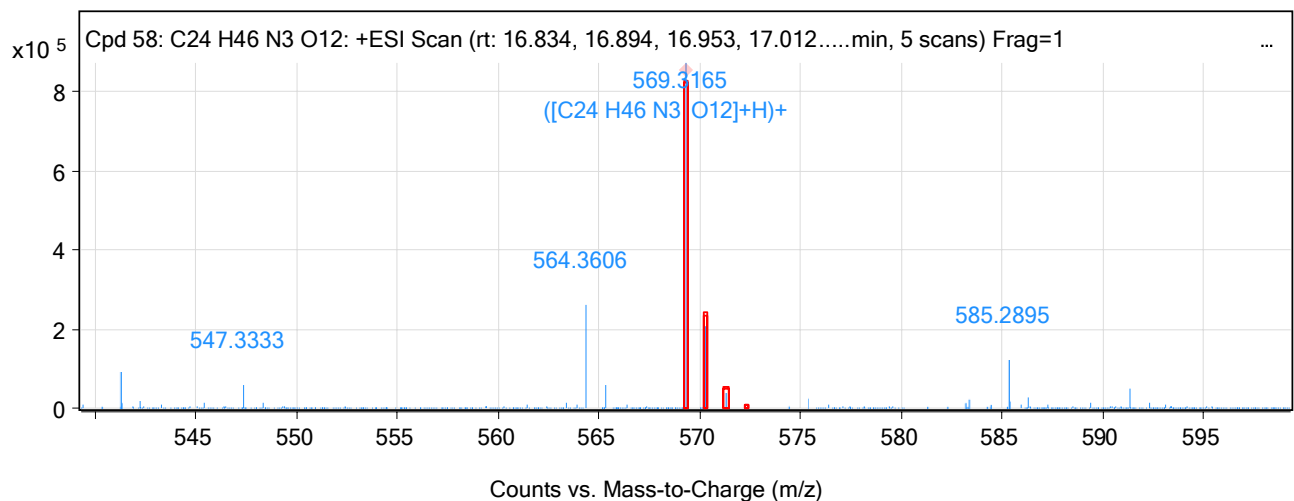

MS Spectrum Peak List

| m/z      | Calc m/z | Diff(ppm) | z | Abund     | Formula                                                        | Ion                |
|----------|----------|-----------|---|-----------|----------------------------------------------------------------|--------------------|
| 481.2633 |          |           | 1 | 450555.19 |                                                                |                    |
| 525.2904 |          |           | 1 | 714818.63 |                                                                |                    |
| 569.3165 | 569.3154 | -1.83     | 1 | 873159.38 | C <sub>24</sub> H <sub>46</sub> N <sub>3</sub> O <sub>12</sub> | (M+H) <sup>+</sup> |
| 570.3191 | 570.3186 | -0.95     | 1 | 206779.22 | C <sub>24</sub> H <sub>46</sub> N <sub>3</sub> O <sub>12</sub> | (M+H) <sup>+</sup> |
| 571.3213 | 571.3209 | -0.54     | 1 | 34989.93  | C <sub>24</sub> H <sub>46</sub> N <sub>3</sub> O <sub>12</sub> | (M+H) <sup>+</sup> |
| 572.3241 | 572.3235 | -1.03     | 1 | 4937.85   | C <sub>24</sub> H <sub>46</sub> N <sub>3</sub> O <sub>12</sub> | (M+H) <sup>+</sup> |
| 608.3869 |          |           | 1 | 277970.06 |                                                                |                    |
| 613.343  |          |           | 1 | 771148.75 |                                                                |                    |

MSMS Spectrum

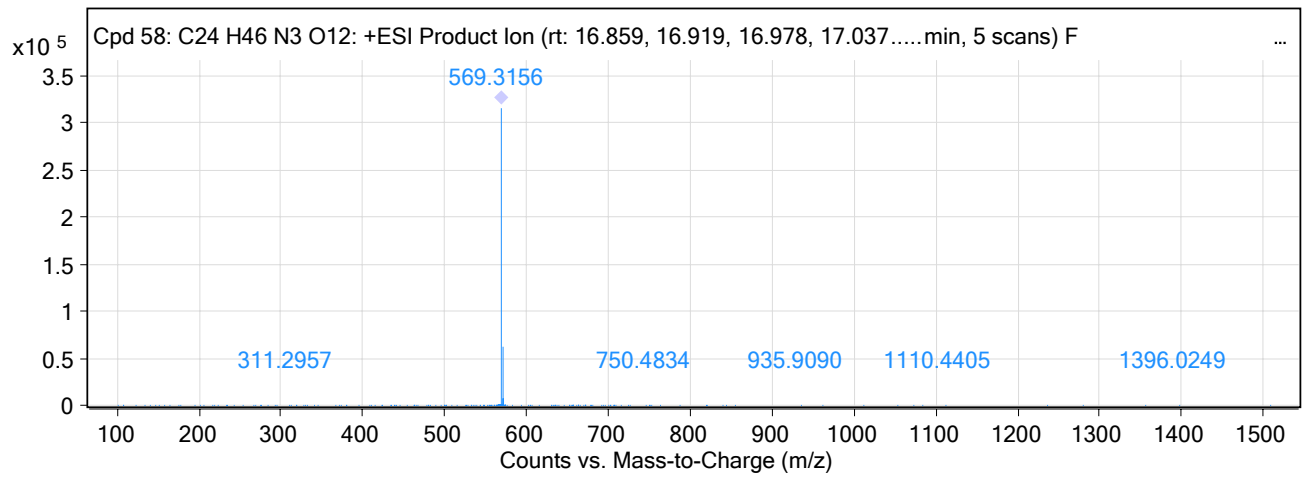

MS/MS Spectrum PeakList

| m/z      | Calc m/z | Diff(ppm) | z | Abund  |
|----------|----------|-----------|---|--------|
| 133.0855 | 133.0859 | 2.83      |   | 38.32  |
| 195.1217 | 195.1214 | -1.68     |   | 32.5   |
| 200.0609 | 200.0639 | 14.97     |   | 12.66  |
| 233.1758 | 233.1747 | -4.52     |   | 13.3   |
| 309.2774 | 309.2775 | 0.28      |   | 50.15  |
| 311.2957 | 311.2945 | -3.98     |   | 58.15  |
| 371.2279 | 371.2262 | -4.55     |   | 20.08  |
| 372.2315 | 372.234  | 6.92      |   | 17.32  |
| 538.2578 | 538.2607 | 5.32      |   | 15.68  |
| 569.3156 | 569.3154 | -0.34     | 1 | 316164 |

| Compound Label                                          | m/z      | RT     | Algorithm  | Mass     |
|---------------------------------------------------------|----------|--------|------------|----------|
| Cpd 59: C <sub>28</sub> H <sub>52</sub> O <sub>14</sub> | 613.3429 | 17.173 | Auto MS/MS | 612.3354 |

Compound Chromatograms

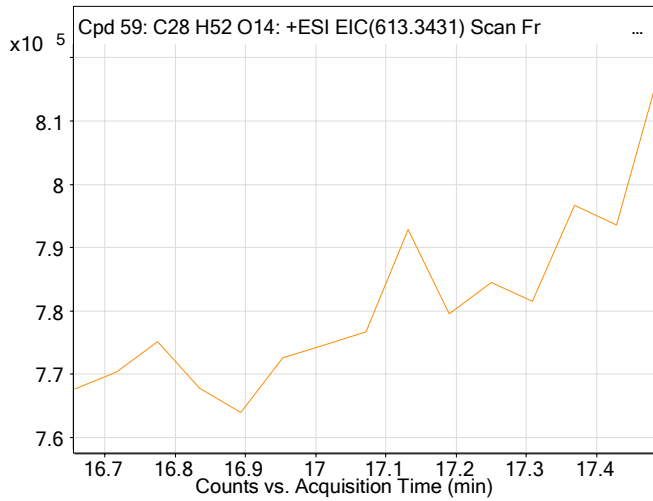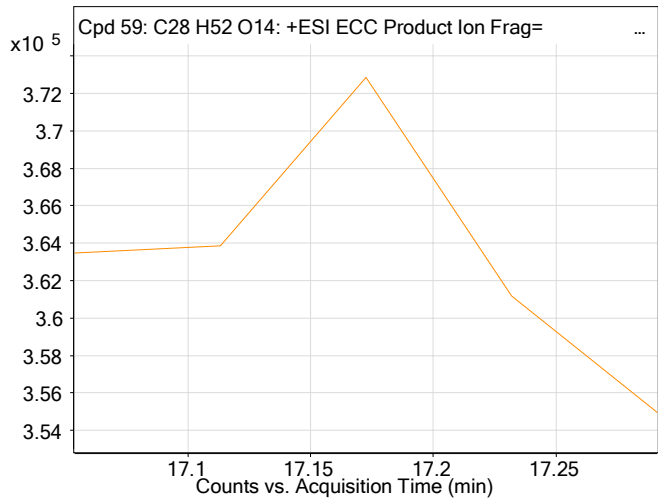

MS Spectrum

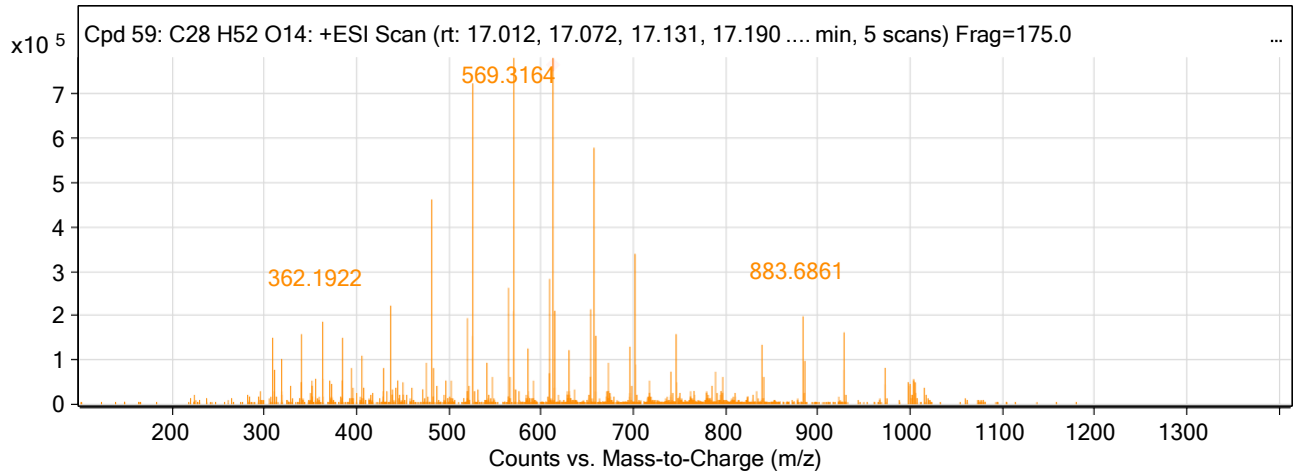

MS Zoomed Spectrum

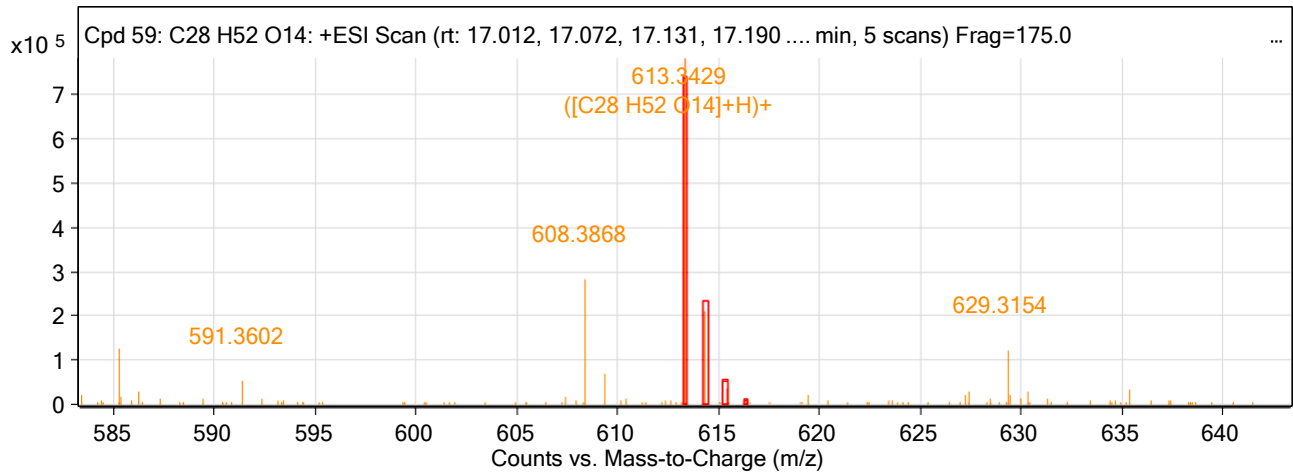

MS Spectrum Peak List

| m/z      | Calc m/z | Diff(ppm) | z | Abund     | Formula     | Ion    |
|----------|----------|-----------|---|-----------|-------------|--------|
| 481.2632 |          |           | 1 | 459397.59 |             |        |
| 525.2902 |          |           | 1 | 723400.19 |             |        |
| 569.3164 |          |           | 1 | 878250.63 |             |        |
| 608.3868 |          |           | 1 | 283154.03 |             |        |
| 613.3429 | 613.343  | 0.18      | 1 | 781659.06 | C28 H52 O14 | (M+H)+ |
| 614.3454 | 614.3464 | 1.62      | 1 | 211229.8  | C28 H52 O14 | (M+H)+ |
| 615.3475 | 615.3489 | 2.28      | 1 | 37878.04  | C28 H52 O14 | (M+H)+ |
| 616.3564 | 616.3515 | -7.84     | 1 | 5548.65   | C28 H52 O14 | (M+H)+ |
| 657.3688 |          |           | 1 | 575827.56 |             |        |
| 701.3949 |          |           | 1 | 339910.03 |             |        |

MSMS Spectrum

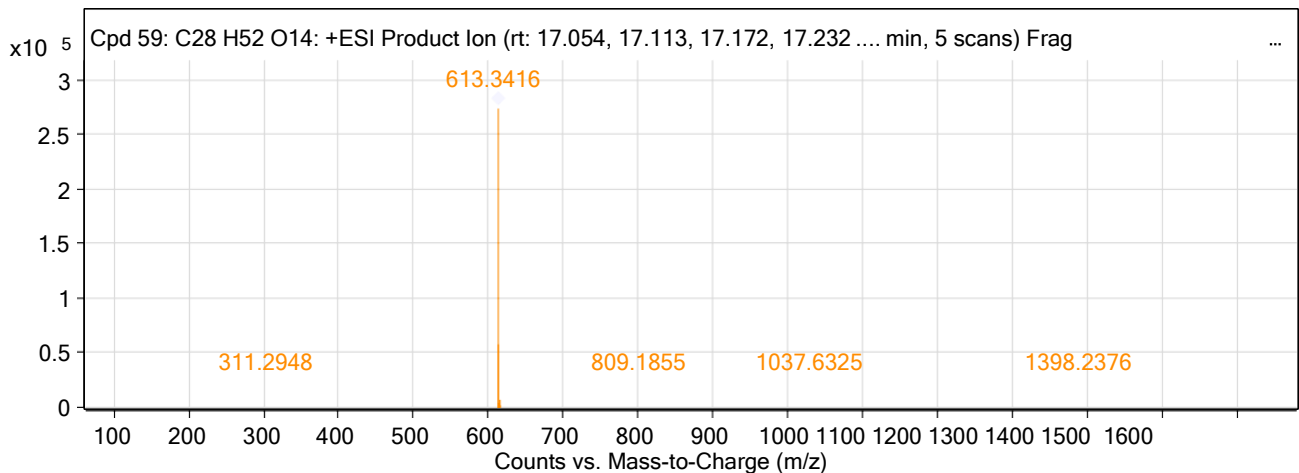

**MS/MS Spectrum Peak List**

| m/z      | Calc m/z | Diff(ppm) | z | Abund     |
|----------|----------|-----------|---|-----------|
| 133.0865 | 133.0859 | -4.71     |   | 37.53     |
| 309.2781 | 309.2788 | 2.23      |   | 60.35     |
| 311.2948 | 311.2945 | -1.2      |   | 101.73    |
| 357.0641 | 357.0664 | 6.4       | 1 | 44.22     |
| 612.3876 |          |           | 2 | 2824.14   |
| 612.6379 |          |           |   | 3534.99   |
| 612.8883 |          |           | 2 | 2744.48   |
| 613.3416 | 613.343  | 2.19      | 1 | 273502.72 |
| 614.3443 |          |           | 1 | 56977.68  |
| 615.3468 |          |           | 1 | 6892.29   |

| Compound Label         | m/z      | RT     | Algorithm  | Mass     |
|------------------------|----------|--------|------------|----------|
| Cpd 60: C24 H46 N3 O12 | 569.3164 | 17.274 | Auto MS/MS | 568.3089 |

**Compound Chromatograms**

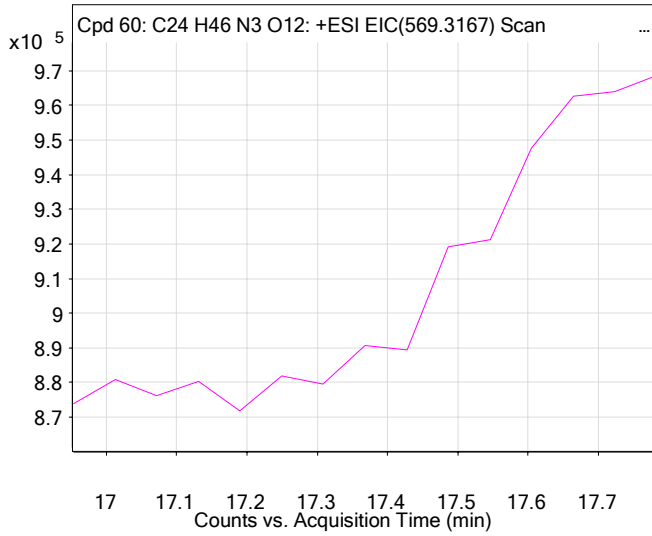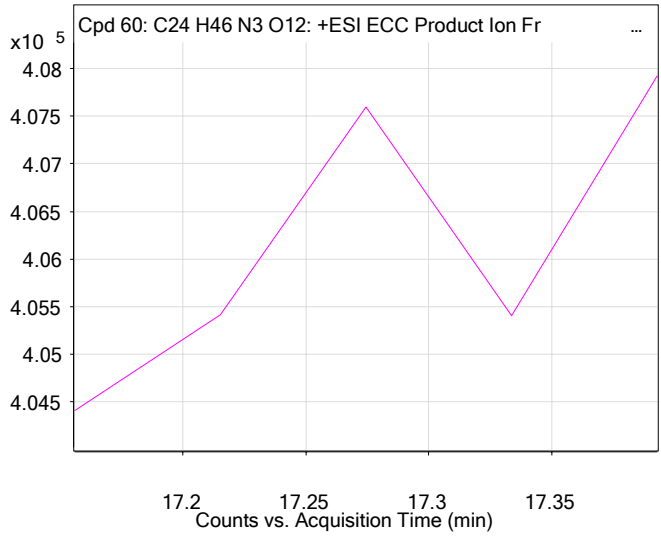

**MS Spectrum**

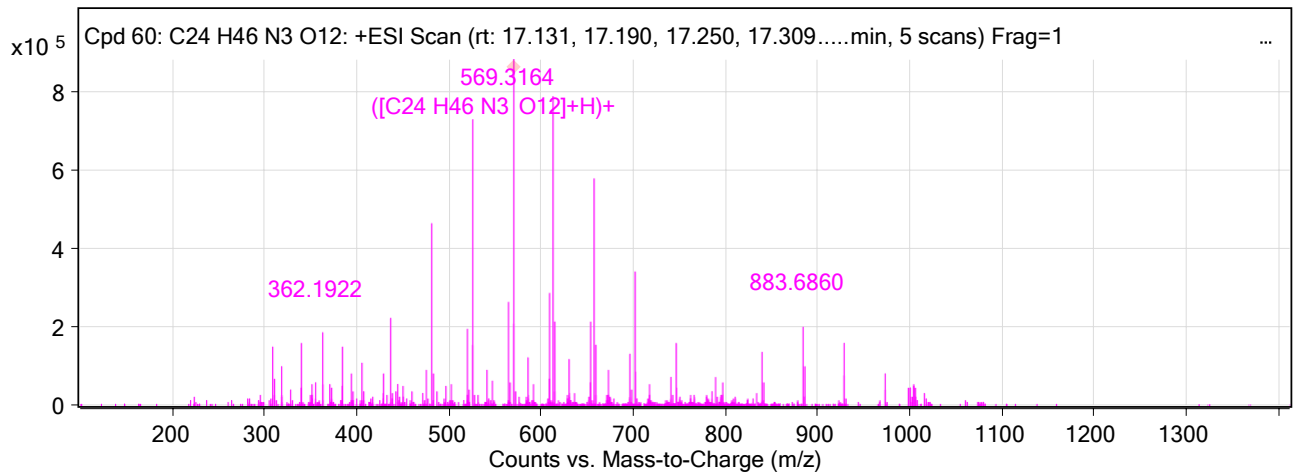

**MS Zoomed Spectrum**

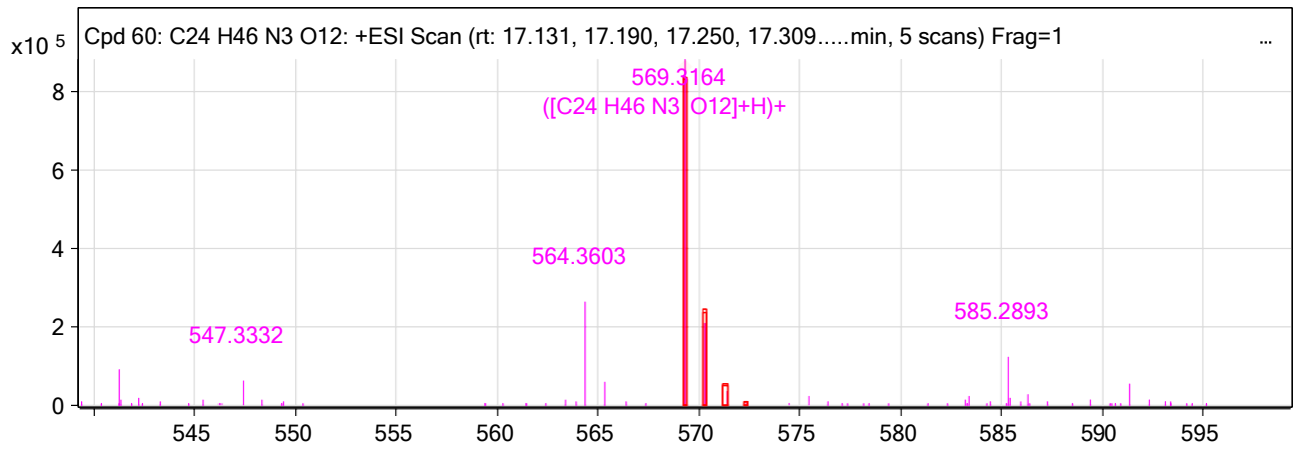

**MS Spectrum Peak List**

| m/z      | Calc m/z | Diff(ppm) | z | Abund     | Formula                                                        | Ion                |
|----------|----------|-----------|---|-----------|----------------------------------------------------------------|--------------------|
| 481.2631 |          |           | 1 | 462033.19 |                                                                |                    |
| 525.2902 |          |           | 1 | 727032.81 |                                                                |                    |
| 569.3164 | 569.3154 | -1.64     | 1 | 880898.31 | C <sub>24</sub> H <sub>46</sub> N <sub>3</sub> O <sub>12</sub> | (M+H) <sup>+</sup> |
| 570.319  | 570.3186 | -0.63     | 1 | 210176.91 | C <sub>24</sub> H <sub>46</sub> N <sub>3</sub> O <sub>12</sub> | (M+H) <sup>+</sup> |
| 571.321  | 571.3209 | -0.09     | 1 | 34799.26  | C <sub>24</sub> H <sub>46</sub> N <sub>3</sub> O <sub>12</sub> | (M+H) <sup>+</sup> |
| 572.324  | 572.3235 | -0.85     | 1 | 5138.92   | C <sub>24</sub> H <sub>46</sub> N <sub>3</sub> O <sub>12</sub> | (M+H) <sup>+</sup> |
| 608.3867 |          |           | 1 | 284964.25 |                                                                |                    |
| 613.3428 |          |           | 1 | 787050.19 |                                                                |                    |
| 657.3688 |          |           | 1 | 575656.5  |                                                                |                    |
| 701.3948 |          |           | 1 | 341920.94 |                                                                |                    |

MSMS Spectrum

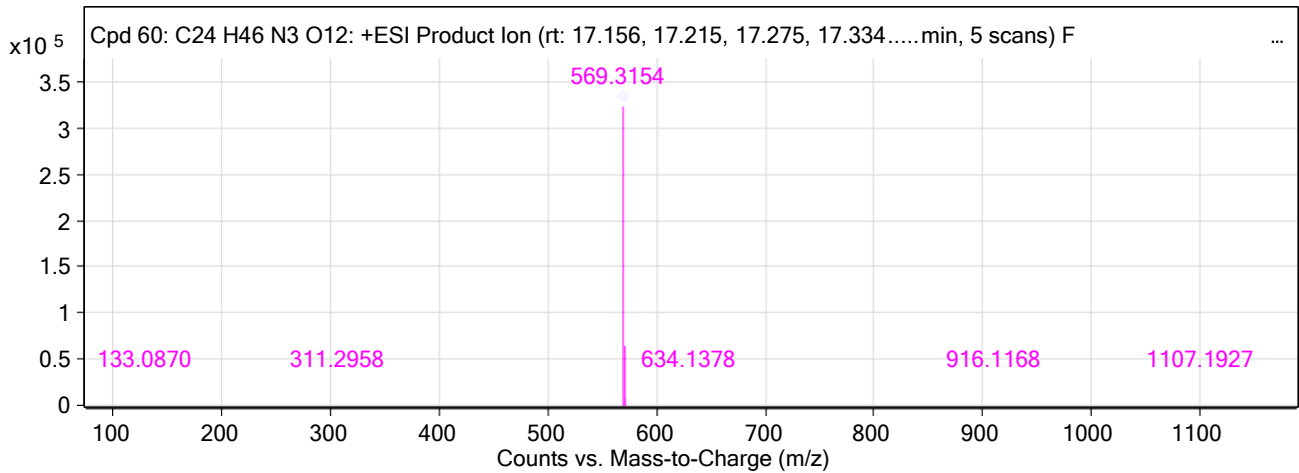

**MS/MS Spectrum Peak List**

| m/z      | Calc m/z | Diff(ppm) | z | Abund     |
|----------|----------|-----------|---|-----------|
| 117.091  | 117.091  | 0.43      |   | 14.93     |
| 133.087  | 133.0859 | -7.91     |   | 60.09     |
| 177.1117 | 177.1121 | 2.58      |   | 11.83     |
| 208.1307 | 208.1305 | -0.7      |   | 13.46     |
| 309.2795 | 309.2788 | -2.12     |   | 18.04     |
| 311.2958 | 311.2945 | -4.2      | 1 | 43.91     |
| 351.2847 | 351.2853 | 1.84      |   | 11.83     |
| 504.296  | 504.2916 | -8.73     |   | 18        |
| 538.3019 | 538.297  | -8.94     | 1 | 19.76     |
| 569.3154 | 569.3154 | 0.07      | 1 | 323318.41 |

| Compound Label                                          | m/z     | RT     | Algorithm  | Mass     |
|---------------------------------------------------------|---------|--------|------------|----------|
| Cpd 61: C <sub>28</sub> H <sub>52</sub> O <sub>14</sub> | 613.343 | 17.469 | Auto MS/MS | 612.3355 |

**Compound Chromatograms**



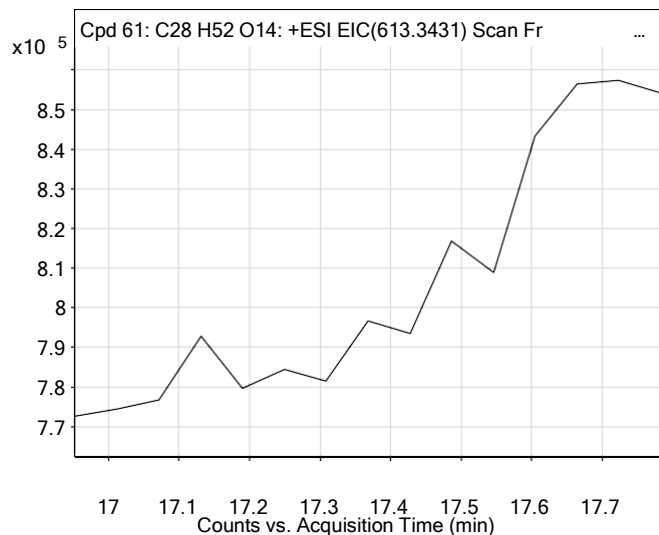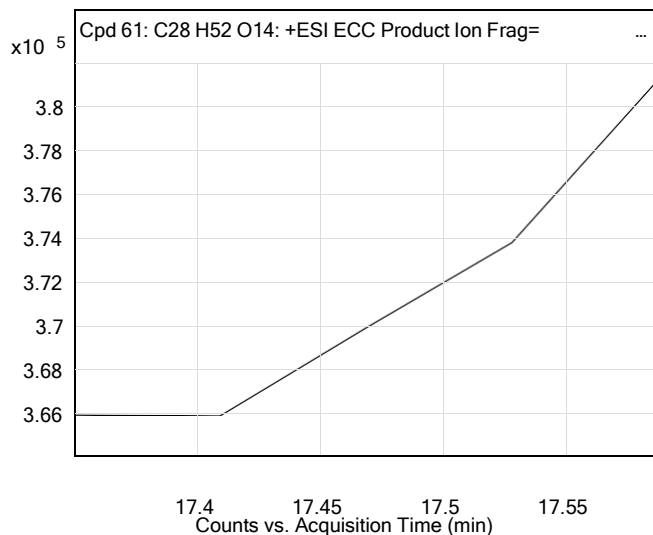

MS Spectrum

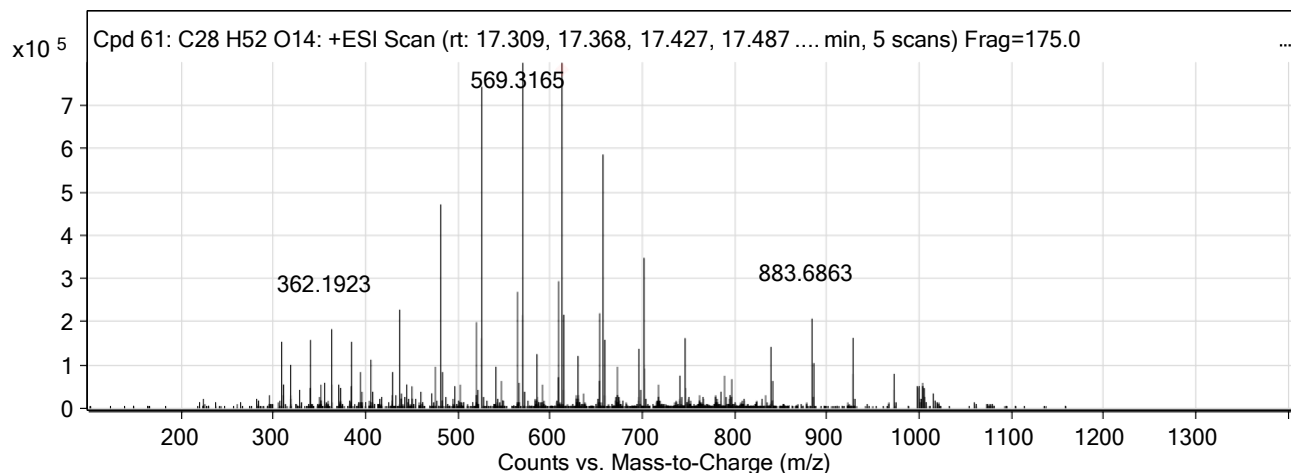

MS Zoomed Spectrum

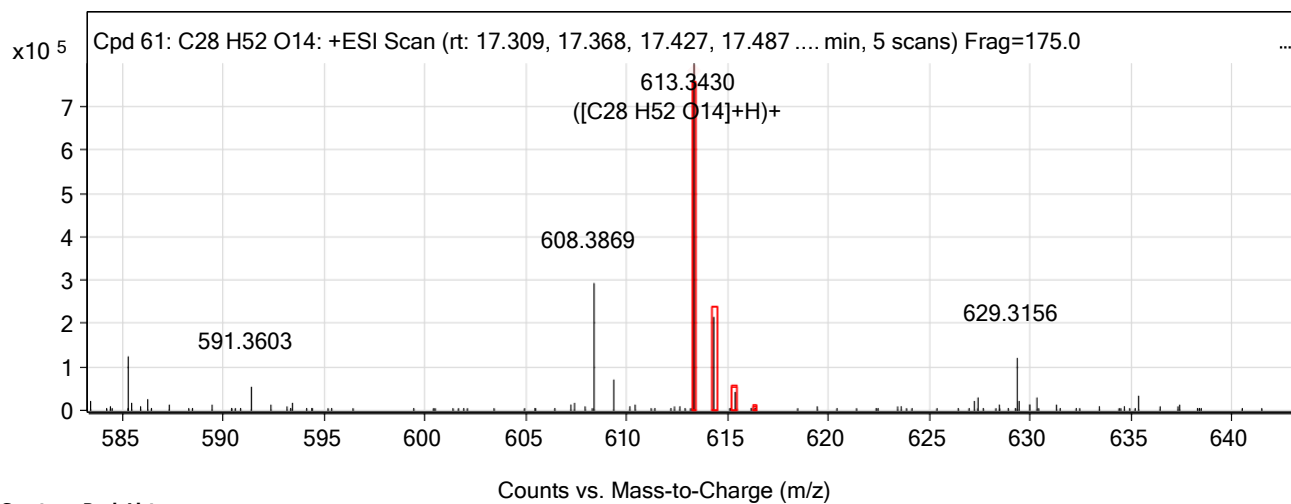

MS Spectrum Peak List

| m/z      | Calc m/z | Diff(ppm) | z | Abund     | Formula     | Ion    |
|----------|----------|-----------|---|-----------|-------------|--------|
| 481.2633 |          |           | 1 | 469381.69 |             |        |
| 525.2903 |          |           | 1 | 741508.13 |             |        |
| 569.3165 |          |           | 1 | 899988.69 |             |        |
| 608.3869 |          |           | 1 | 291407.44 |             |        |
| 613.343  | 613.343  | 0.04      | 1 | 799522.88 | C28 H52 O14 | (M+H)+ |
| 614.3456 | 614.3464 | 1.37      | 1 | 216132.09 | C28 H52 O14 | (M+H)+ |
| 615.3476 | 615.3489 | 2.06      | 1 | 39409.12  | C28 H52 O14 | (M+H)+ |

MSMS Spectrum

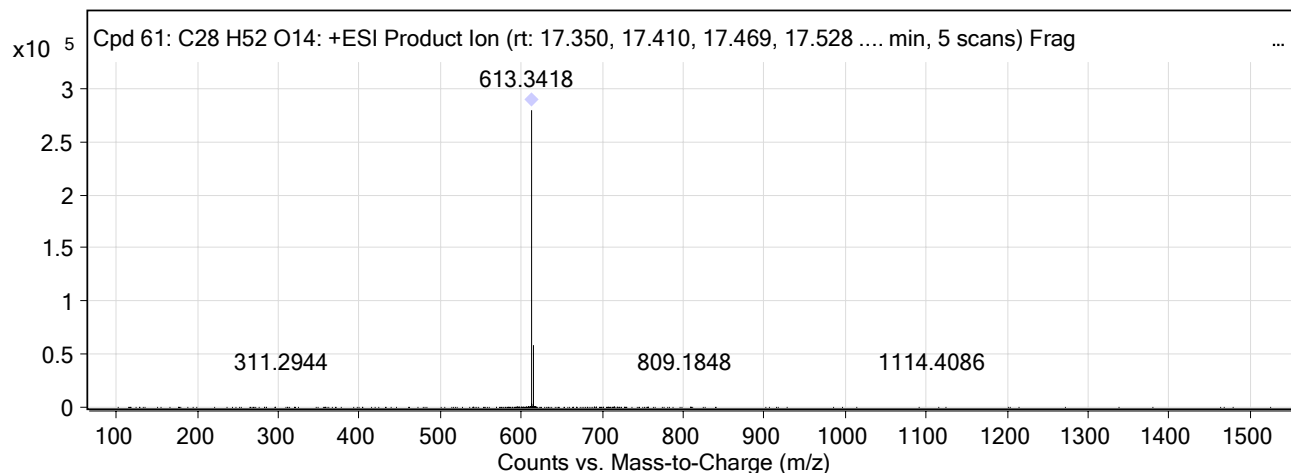

MS/MS Spectrum PeakList

| m/z      | Calc m/z | Diff(ppm) | z | Abund     |
|----------|----------|-----------|---|-----------|
| 309.2769 | 309.2788 | 6.2       | 1 | 89.42     |
| 357.0632 | 357.0664 | 8.9       | 1 | 42.52     |
| 612.3879 |          |           | 2 | 2889.56   |
| 612.6381 |          |           | 2 | 3354.27   |
| 612.8897 |          |           | 2 | 2820.5    |
| 613.1398 |          |           | 2 | 1373.2    |
| 613.3418 | 613.343  | 1.9       | 1 | 279875.97 |
| 614.3446 |          |           | 1 | 58874.28  |
| 615.1412 |          |           | 1 | 1175.73   |
| 615.3467 |          |           | 1 | 7152.39   |

| Compound Label         | m/z      | RT     | Algorithm  | Mass    |
|------------------------|----------|--------|------------|---------|
| Cpd 62: C24 H46 N3 O12 | 569.3163 | 17.571 | Auto MS/MS | 568.309 |

Compound Chromatograms

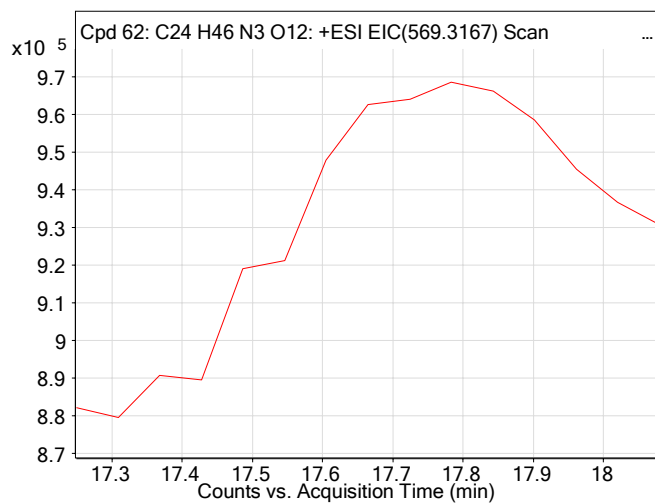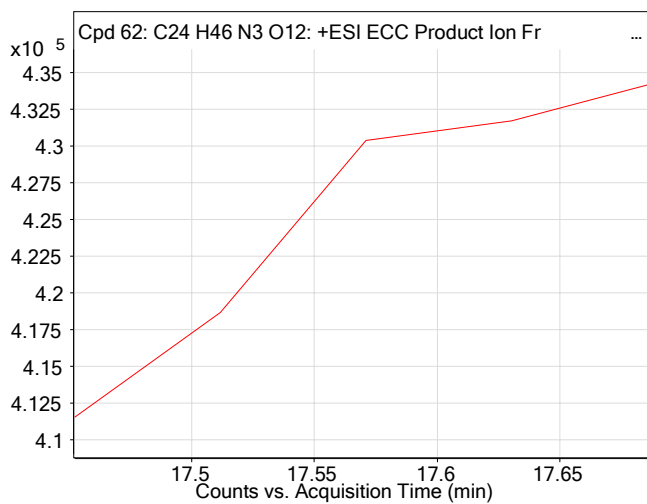

MS Spectrum

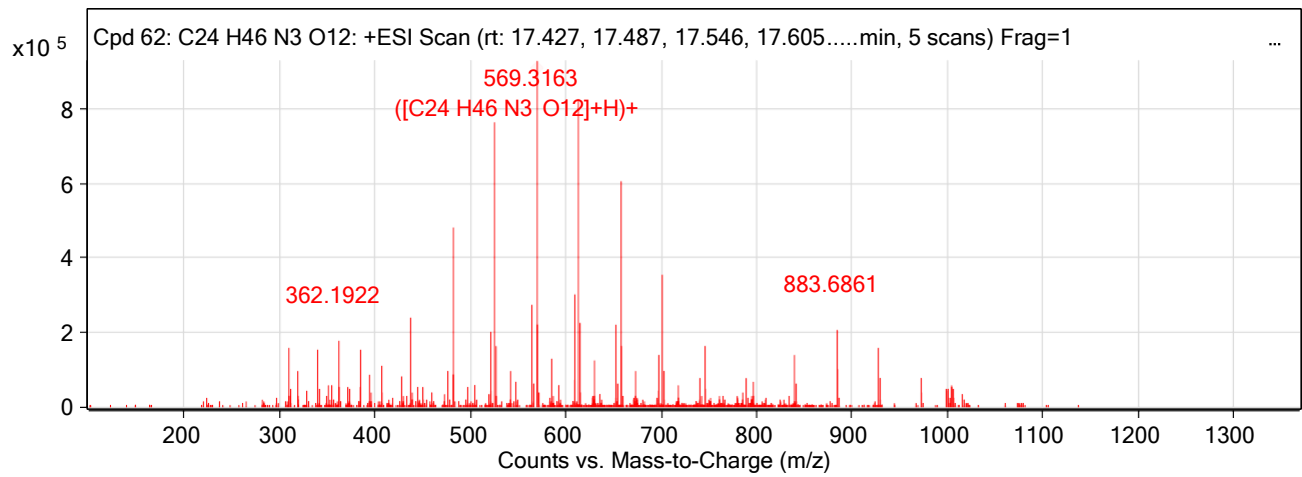

MS Zoomed Spectrum

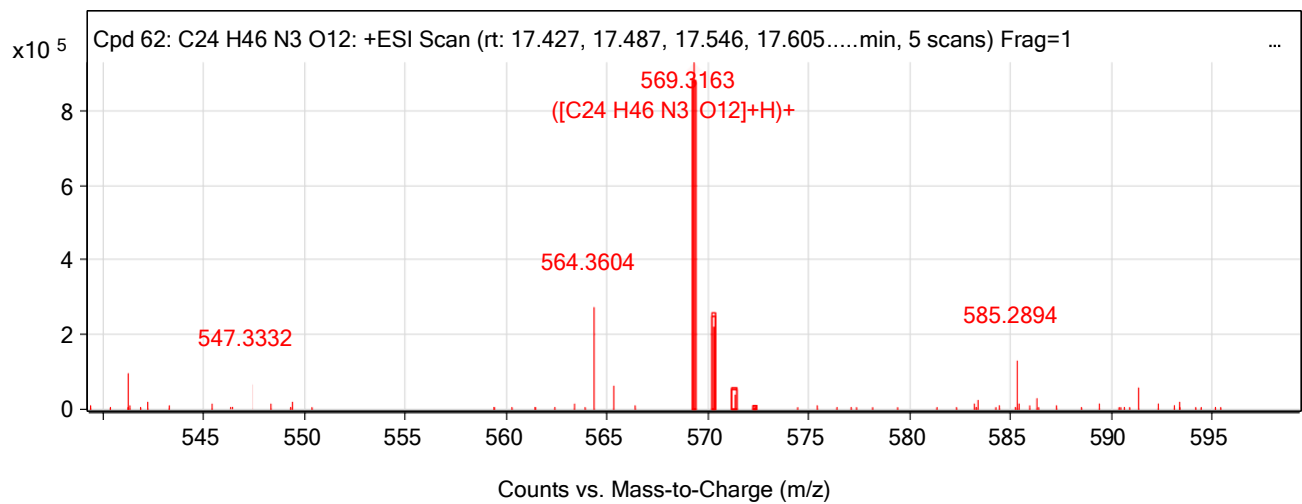

MS Spectrum Peak List

| m/z      | Calc m/z | Diff(ppm) | z | Abund     | Formula                                                        | Ion                |
|----------|----------|-----------|---|-----------|----------------------------------------------------------------|--------------------|
| 481.2632 |          |           | 1 | 480305.66 |                                                                |                    |
| 525.2902 |          |           | 1 | 762819.88 |                                                                |                    |
| 569.3163 | 569.3154 | -1.6      | 1 | 928038.69 | C <sub>24</sub> H <sub>46</sub> N <sub>3</sub> O <sub>12</sub> | (M+H) <sup>+</sup> |
| 570.319  | 570.3186 | -0.78     | 1 | 220927.58 | C <sub>24</sub> H <sub>46</sub> N <sub>3</sub> O <sub>12</sub> | (M+H) <sup>+</sup> |
| 571.3212 | 571.3209 | -0.43     | 1 | 36533.21  | C <sub>24</sub> H <sub>46</sub> N <sub>3</sub> O <sub>12</sub> | (M+H) <sup>+</sup> |
| 572.3239 | 572.3235 | -0.64     | 1 | 5256.66   | C <sub>24</sub> H <sub>46</sub> N <sub>3</sub> O <sub>12</sub> | (M+H) <sup>+</sup> |
| 608.3868 |          |           | 1 | 300599.34 |                                                                |                    |
| 613.3429 |          |           | 1 | 823814.13 |                                                                |                    |
| 657.3688 |          |           | 1 | 601934.13 |                                                                |                    |
| 701.3948 |          |           | 1 | 355407.44 |                                                                |                    |

MSMS Spectrum

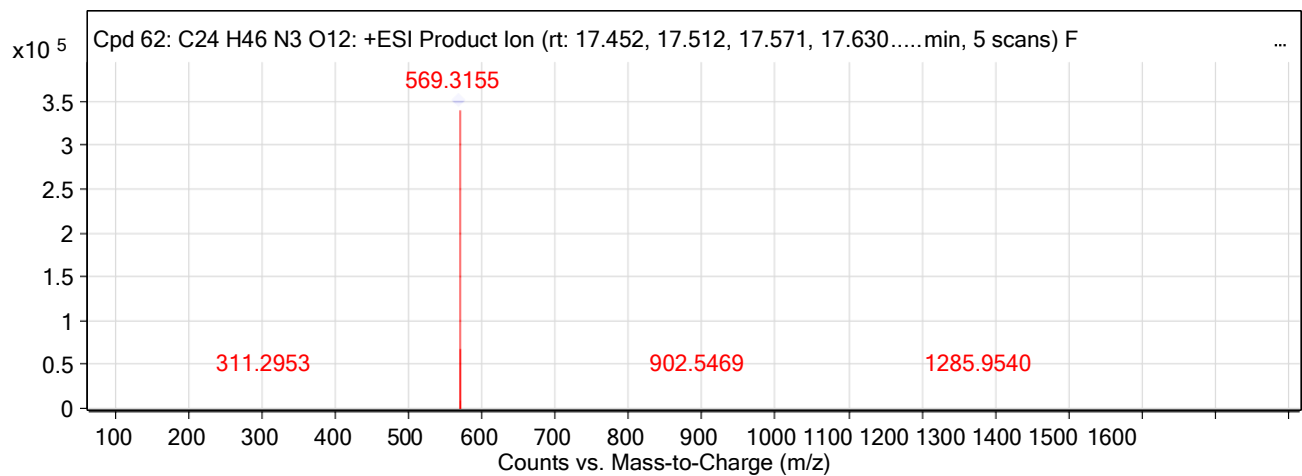

**MS/MS Spectrum Peak List**

| m/z      | Calc m/z | Diff(ppm) | z | Abund     |
|----------|----------|-----------|---|-----------|
| 124.0802 | 124.0757 | -36.52    |   | 15.25     |
| 133.0854 | 133.0859 | 4.1       |   | 38.19     |
| 175.134  | 175.1329 | -6.42     |   | 15.33     |
| 283.1765 | 283.1778 | 4.7       |   | 27.57     |
| 309.2764 | 309.2775 | 3.45      |   | 18.01     |
| 311.2953 | 311.2945 | -2.84     | 1 | 37.92     |
| 371.2266 | 371.2262 | -0.97     |   | 28.29     |
| 449.28   | 449.2745 | -12.15    |   | 16.77     |
| 460.2609 | 460.2627 | 3.88      |   | 15.3      |
| 569.3155 | 569.3154 | -0.07     | 1 | 339869.97 |

| Compound Label      | m/z      | RT     | Algorithm  | Mass     |
|---------------------|----------|--------|------------|----------|
| Cpd 63: C28 H52 O14 | 613.3431 | 17.766 | Auto MS/MS | 612.3356 |

**Compound Chromatograms**

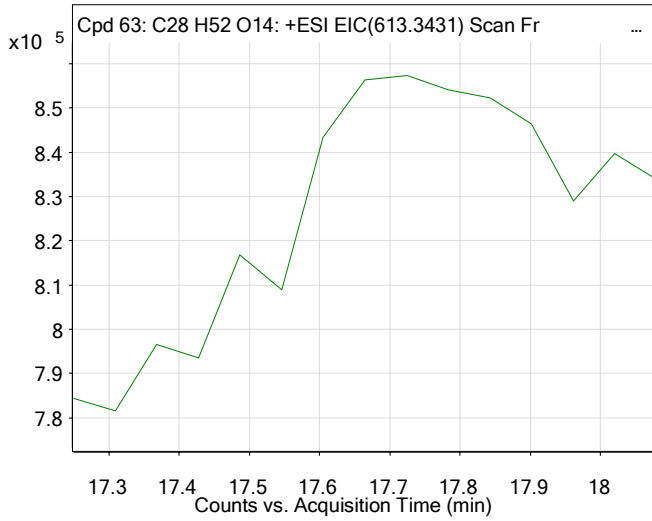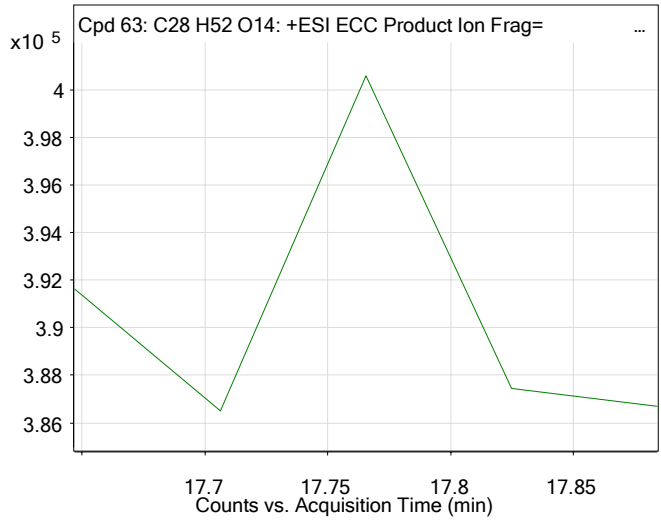

**MS Spectrum**

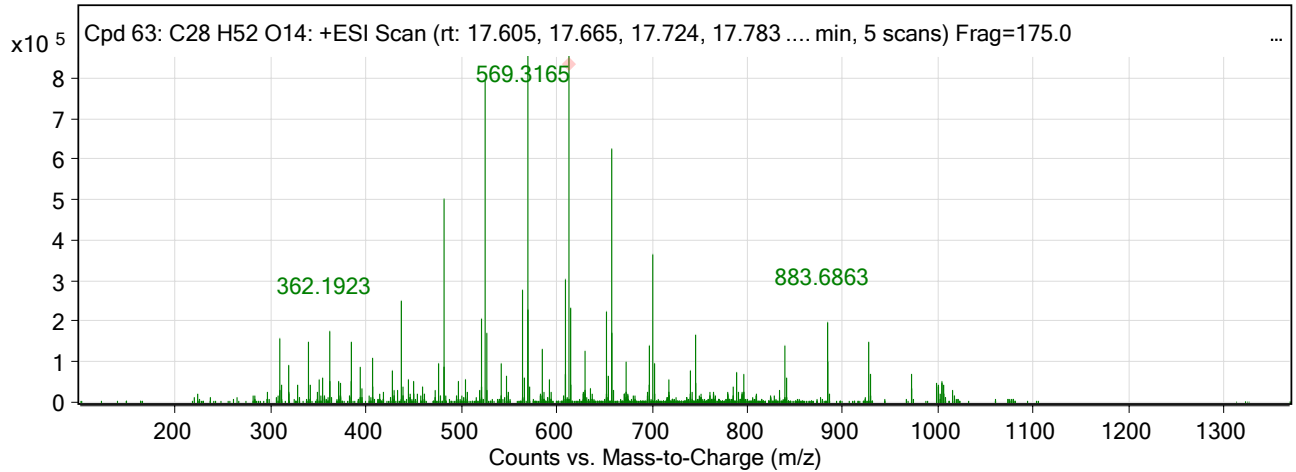

**MS Zoomed Spectrum**

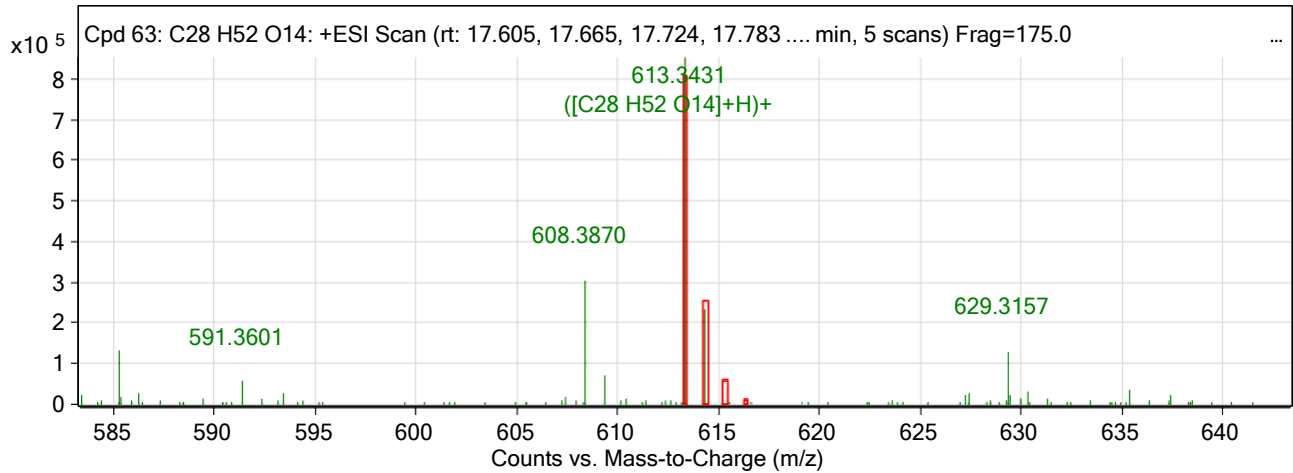

**MS Spectrum Peak List**

| m/z      | Calc m/z | Diff(ppm) | z | Abund     | Formula     | Ion    |
|----------|----------|-----------|---|-----------|-------------|--------|
| 481.2633 |          |           | 1 | 499613.94 |             |        |
| 525.2903 |          |           | 1 | 791541.38 |             |        |
| 569.3165 |          |           | 1 | 961874.81 |             |        |
| 608.387  |          |           | 1 | 303752.69 |             |        |
| 613.3431 | 613.343  | -0.13     | 1 | 852726.19 | C28 H52 O14 | (M+H)+ |
| 614.3457 | 614.3464 | 1.23      | 1 | 231127.03 | C28 H52 O14 | (M+H)+ |
| 615.3475 | 615.3489 | 2.18      | 1 | 42106.76  | C28 H52 O14 | (M+H)+ |
| 616.3549 | 616.3515 | -5.42     | 1 | 5801.87   | C28 H52 O14 | (M+H)+ |
| 657.369  |          |           | 1 | 625370.31 |             |        |
| 701.3951 |          |           | 1 | 367256.47 |             |        |

**MS/MS Spectrum**

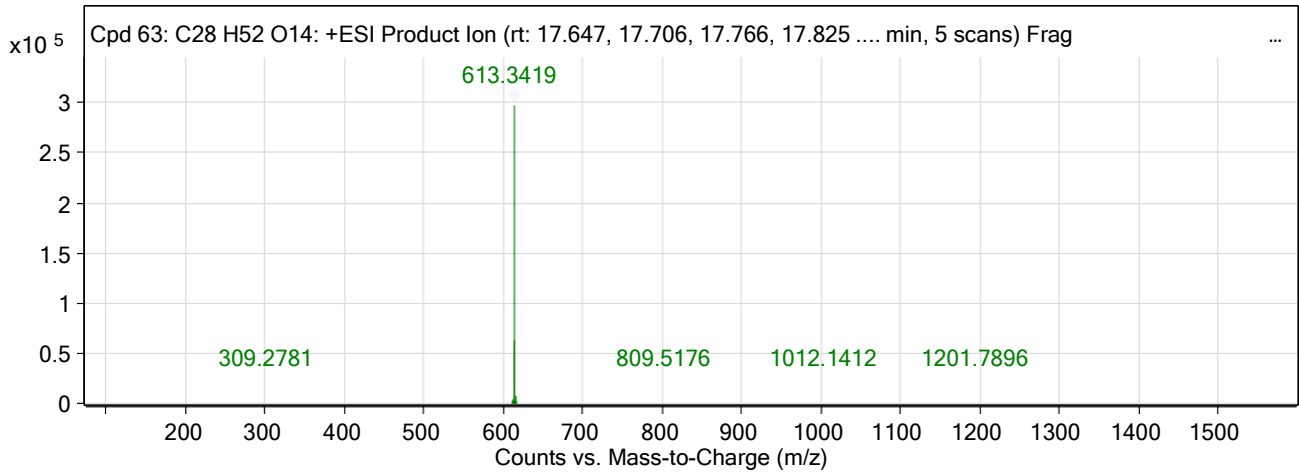

**MS/MS Spectrum Peak List**

| m/z      | Calc m/z | Diff(ppm)  | z | Abund     |
|----------|----------|------------|---|-----------|
| 133.0854 | 133.0859 | 3.87       |   | 53.02     |
| 177.1136 | 88.5558  | -500005.63 | 2 | 39.25     |
| 309.2781 | 309.2788 | 2.41       |   | 89.59     |
| 311.2949 | 311.2945 | -1.36      | 1 | 78.73     |
| 357.067  | 357.0664 | -1.76      |   | 46.48     |
| 612.6385 |          |            |   | 3013.63   |
| 612.8889 |          |            | 2 | 2609.03   |
| 613.3419 | 613.343  | 1.83       | 1 | 297409.25 |
| 614.3446 |          |            | 1 | 61632.29  |
| 615.3467 |          |            | 1 | 7343.65   |

| Compound Label      | m/z      | RT     | Algorithm  | Mass     |
|---------------------|----------|--------|------------|----------|
| Cpd 64: C26 H48 O13 | 569.3167 | 17.868 | Auto MS/MS | 568.3093 |

**Compound Chromatograms**

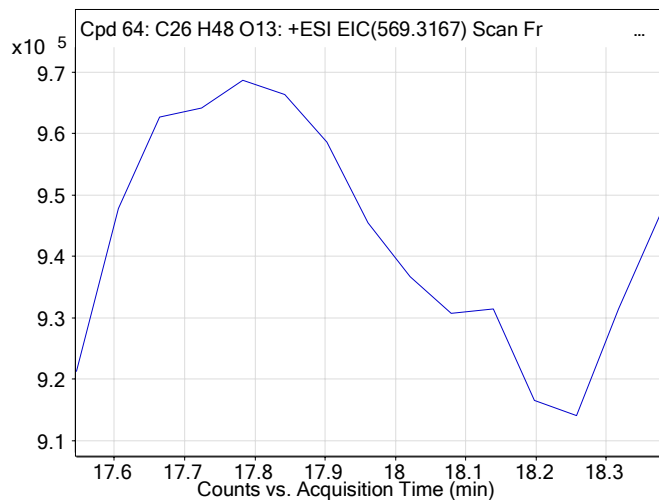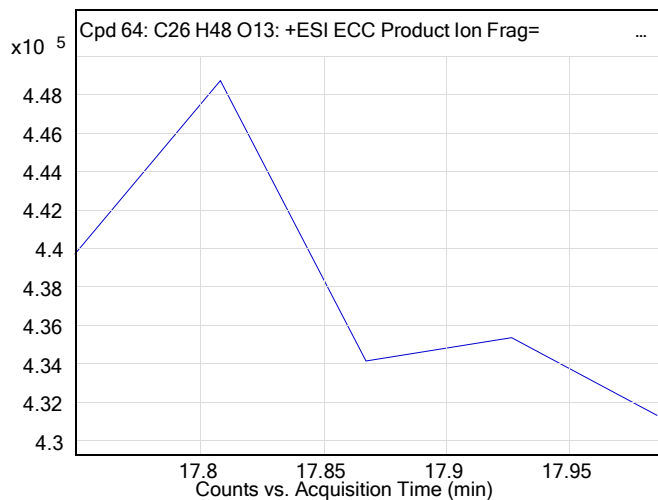

MS Spectrum

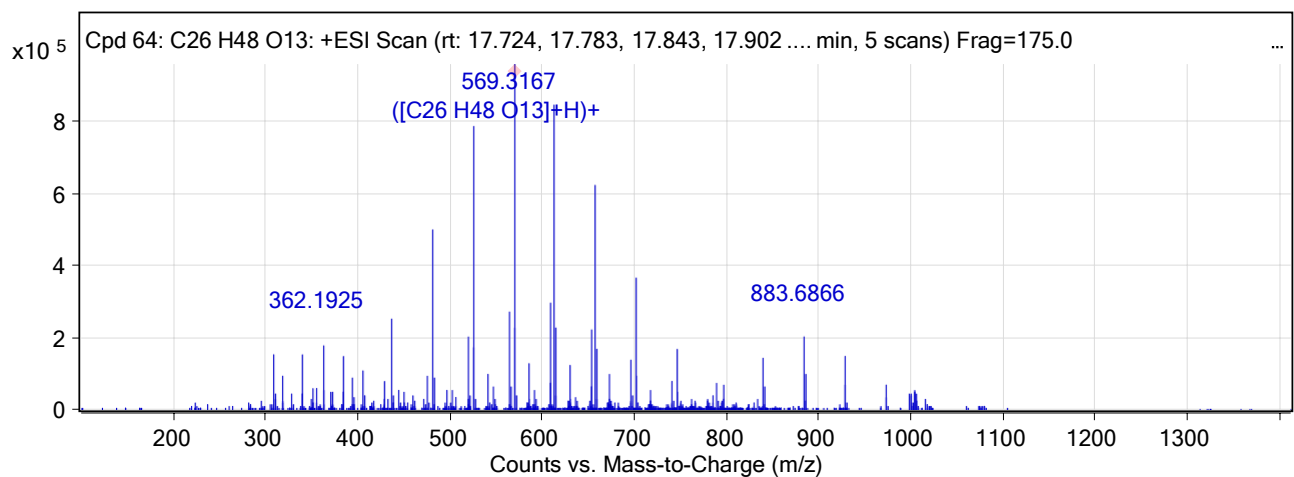

MS Zoomed Spectrum

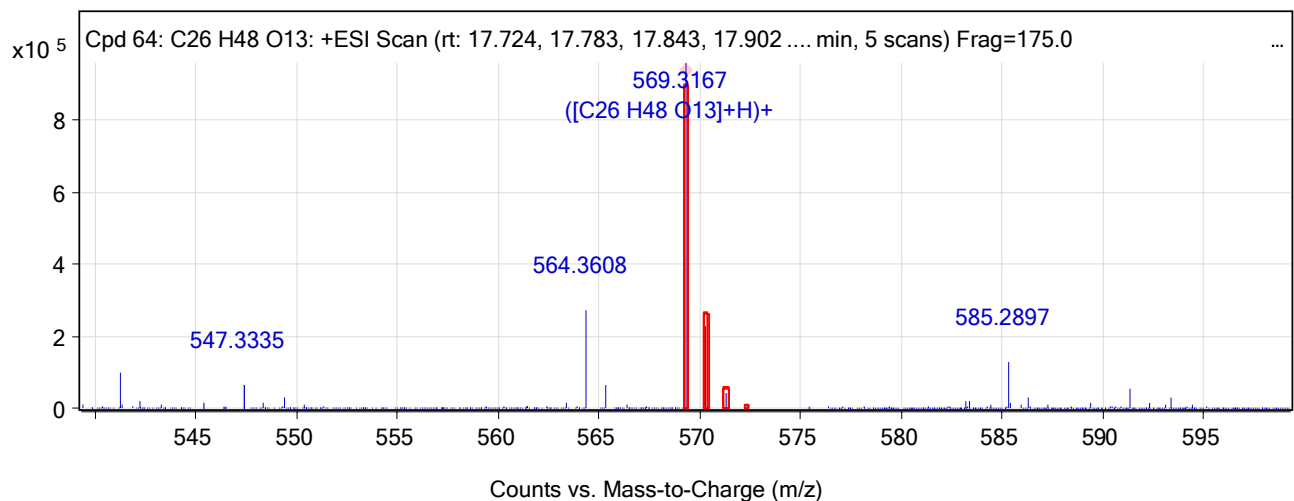

MS Spectrum Peak List

| m/z      | Calc m/z | Diff(ppm) | z | Abund     | Formula     | Ion    |
|----------|----------|-----------|---|-----------|-------------|--------|
| 481.2635 |          |           | 1 | 498299    |             |        |
| 525.2905 |          |           | 1 | 789769.63 |             |        |
| 569.3167 | 569.3168 | 0.06      | 1 | 960597.19 | C26 H48 O13 | (M+H)+ |
| 570.3195 | 570.3202 | 1.27      | 1 | 226029.33 | C26 H48 O13 | (M+H)+ |
| 571.3215 | 571.3226 | 1.93      | 1 | 37727.27  | C26 H48 O13 | (M+H)+ |
| 572.3244 | 572.3253 | 1.57      | 1 | 5429.35   | C26 H48 O13 | (M+H)+ |
| 608.3872 |          |           | 1 | 297684.94 |             |        |
| 613.3433 |          |           | 1 | 847880.63 |             |        |

MSMS Spectrum

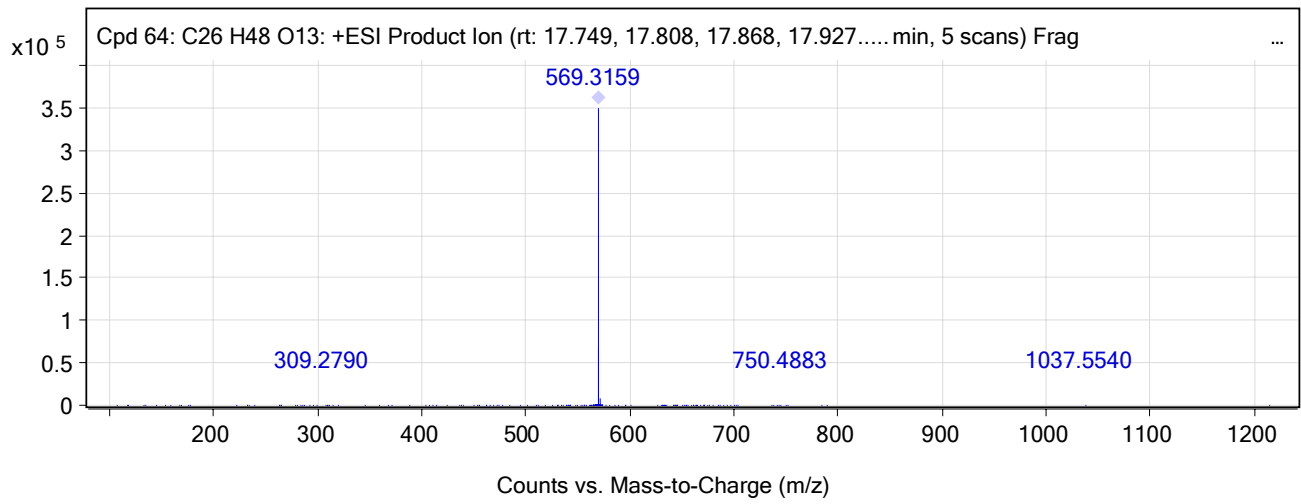

MS/MS Spectrum Peak List

| m/z      | Calc m/z | Diff(ppm)  | z | Abund     |
|----------|----------|------------|---|-----------|
| 117.0914 | 117.091  | -3.2       |   | 51.96     |
| 133.0873 | 133.0859 | -10.44     |   | 34.9      |
| 166.1296 | 166.1352 | 33.96      |   | 17.95     |
| 177.1114 | 177.1121 | 4          |   | 26.68     |
| 309.279  | 309.2788 | -0.71      |   | 45.36     |
| 311.2966 | 311.2945 | -6.97      |   | 43.92     |
| 454.2735 | 454.2772 | 8.16       |   | 16.58     |
| 538.2931 | 538.2984 | 9.86       |   | 19.18     |
| 566.3023 | 283.1464 | -500008.47 | 2 | 23.46     |
| 569.3159 | 569.3168 | 1.55       | 1 | 350099.38 |

| Compound Label      | m/z      | RT     | Algorithm  | Mass     |
|---------------------|----------|--------|------------|----------|
| Cpd 65: C28 H52 O14 | 613.3434 | 18.062 | Auto MS/MS | 612.3359 |

Compound Chromatograms

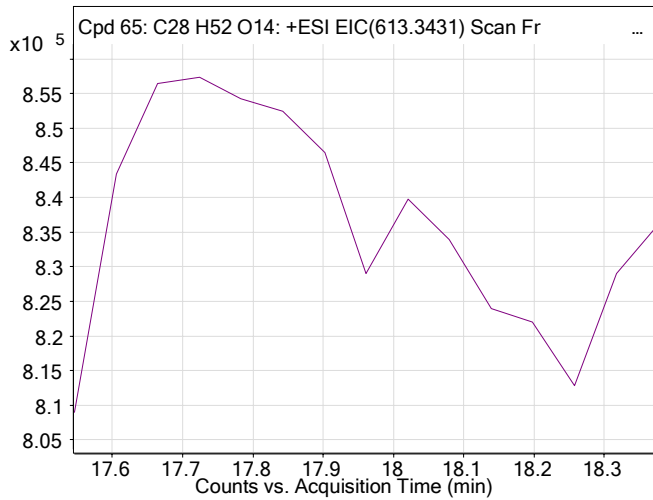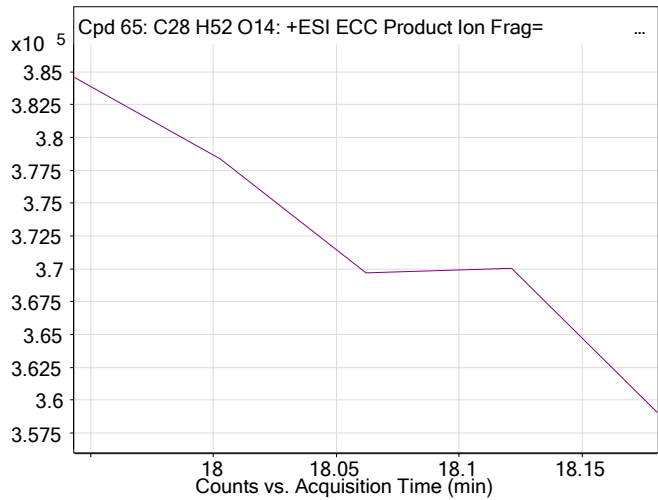

MS Spectrum

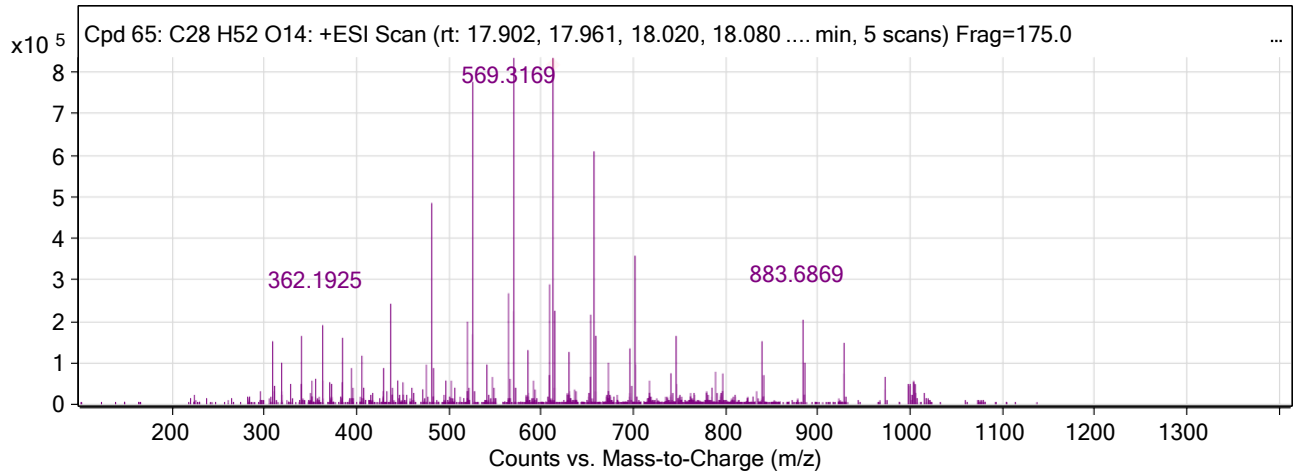

MS Zoomed Spectrum

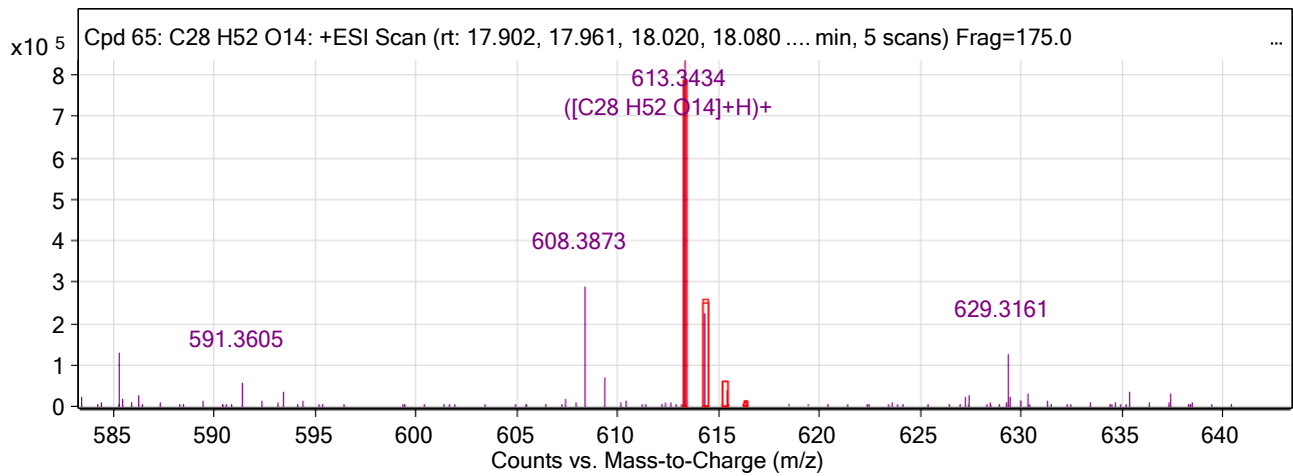

MS Spectrum Peak List

| m/z      | Calc m/z | Diff(ppm) | z | Abund     | Formula     | Ion    |
|----------|----------|-----------|---|-----------|-------------|--------|
| 481.2636 |          |           | 1 | 482438.59 |             |        |
| 525.2906 |          |           | 1 | 773262.13 |             |        |
| 569.3169 |          |           | 1 | 940570.88 |             |        |
| 608.3873 |          |           | 1 | 290243.44 |             |        |
| 613.3434 | 613.343  | -0.65     | 1 | 834629.63 | C28 H52 O14 | (M+H)+ |
| 614.346  | 614.3464 | 0.74      | 1 | 226020.25 | C28 H52 O14 | (M+H)+ |
| 615.3479 | 615.3489 | 1.59      | 1 | 40722.14  | C28 H52 O14 | (M+H)+ |
| 616.3555 | 616.3515 | -6.46     | 1 | 5551.1    | C28 H52 O14 | (M+H)+ |
| 657.3694 |          |           | 1 | 608608.13 |             |        |
| 701.3955 |          |           | 1 | 357756.56 |             |        |

MSMS Spectrum

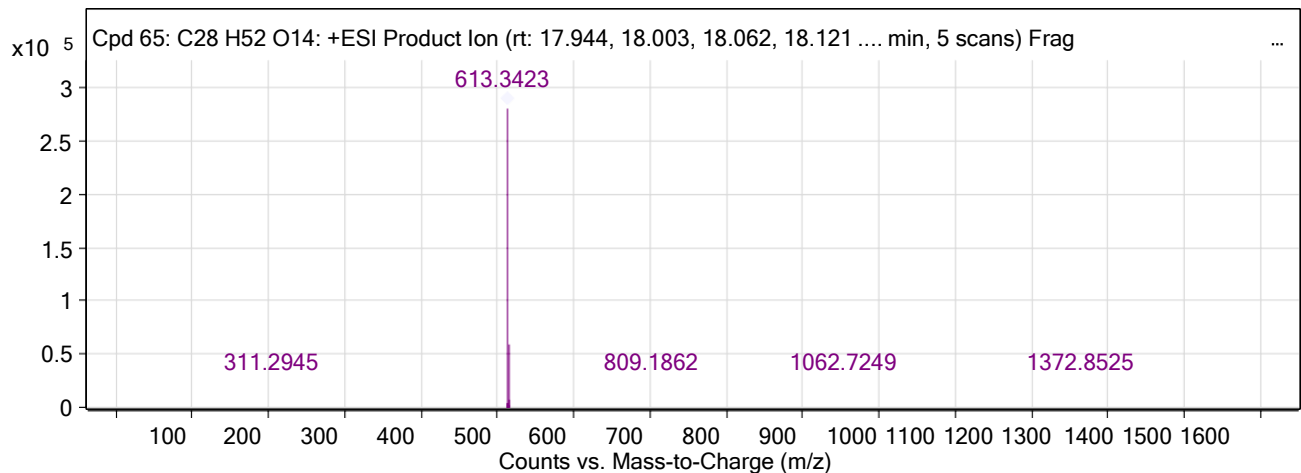



**MS/MS Spectrum Peak List**

| m/z      | Calc m/z | Diff(ppm) | z | Abund     |
|----------|----------|-----------|---|-----------|
| 133.0846 | 133.0859 | 10.17     | 2 | 56.85     |
| 309.2795 | 309.2788 | -2.12     | 2 | 84.35     |
| 311.2945 | 311.2945 | -0.28     | 1 | 143.46    |
| 357.0672 | 357.0664 | -2.46     | 1 | 50.05     |
| 612.3884 |          |           | 2 | 2708.1    |
| 612.6385 |          |           | 2 | 3444.62   |
| 612.8893 |          |           | 2 | 2789.47   |
| 613.3423 | 613.343  | 1.19      | 1 | 280812.06 |
| 614.345  |          |           | 1 | 58680.13  |
| 615.347  |          |           | 1 | 7225.08   |

| Compound Label      | m/z      | RT     | Algorithm  | Mass     |
|---------------------|----------|--------|------------|----------|
| Cpd 66: C26 H48 O13 | 569.3168 | 18.164 | Auto MS/MS | 568.3094 |

**Compound Chromatograms**

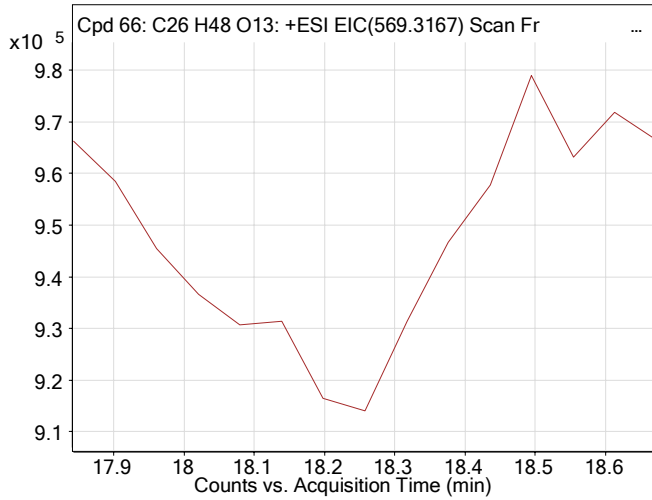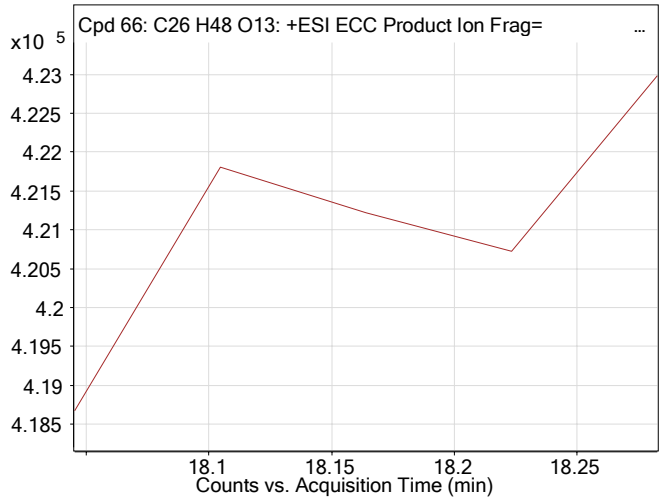

MS Spectrum

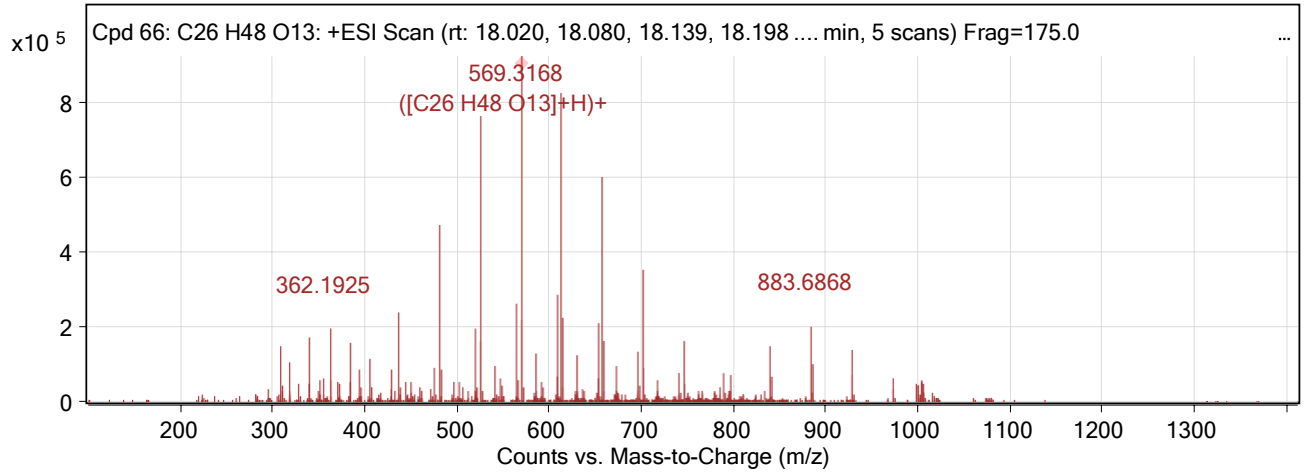

MS Zoomed Spectrum

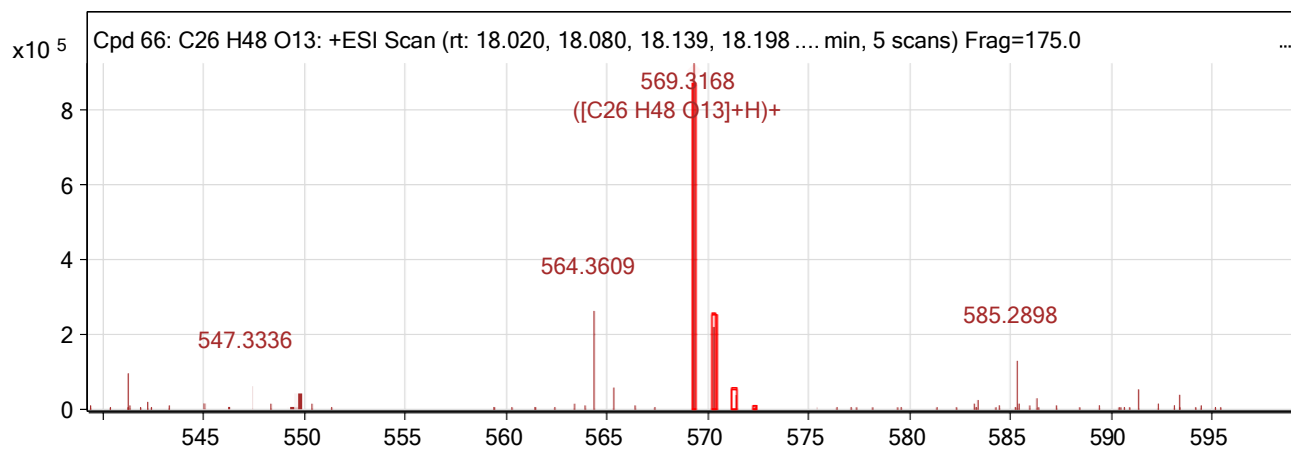

**MS Spectrum Peak List**

| m/z      | Calc m/z | Diff(ppm) | z | Abund     | Formula                                         | Ion                |
|----------|----------|-----------|---|-----------|-------------------------------------------------|--------------------|
| 481.2636 |          |           | 1 | 473319.81 |                                                 |                    |
| 525.2906 |          |           | 1 | 762296.13 |                                                 |                    |
| 569.3168 | 569.3168 | -0.06     | 1 | 925875.39 | C <sub>26</sub> H <sub>48</sub> O <sub>13</sub> | (M+H) <sup>+</sup> |
| 570.3195 | 570.3202 | 1.22      | 1 | 220301.63 | C <sub>26</sub> H <sub>48</sub> O <sub>13</sub> | (M+H) <sup>+</sup> |
| 571.3215 | 571.3226 | 1.92      | 1 | 37102.61  | C <sub>26</sub> H <sub>48</sub> O <sub>13</sub> | (M+H) <sup>+</sup> |
| 572.3244 | 572.3253 | 1.62      | 1 | 5044.19   | C <sub>26</sub> H <sub>48</sub> O <sub>13</sub> | (M+H) <sup>+</sup> |
| 608.3873 |          |           | 1 | 286128.06 |                                                 |                    |
| 613.3433 |          |           | 1 | 826483    |                                                 |                    |
| 657.3694 |          |           | 1 | 602299.75 |                                                 |                    |
| 701.3955 |          |           | 1 | 355095.22 |                                                 |                    |

MSMS Spectrum

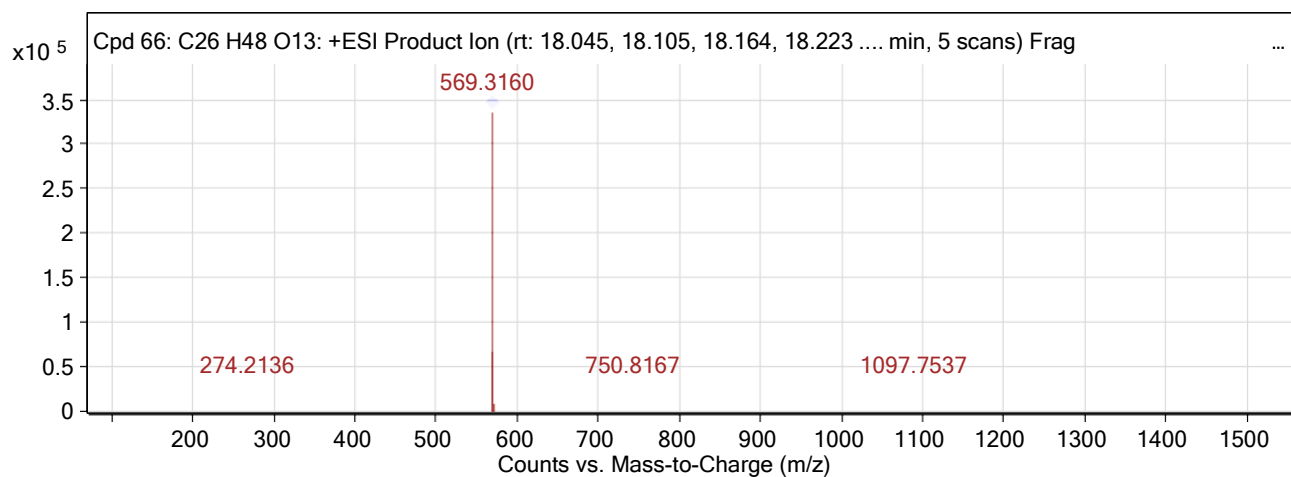

**MS/MS Spectrum Peak List**

| m/z      | Calc m/z | Diff(ppm) | z | Abund     |
|----------|----------|-----------|---|-----------|
| 133.0855 | 133.0859 | 2.84      |   | 54.79     |
| 274.2136 | 274.2139 | 1.02      |   | 30.09     |
| 309.2781 | 309.2788 | 2.37      |   | 29.13     |
| 568.3616 |          |           | 2 | 678.78    |
| 568.6124 |          |           |   | 650.81    |
| 568.8621 |          |           | 2 | 446.21    |
| 569.316  | 569.3168 | 1.37      | 1 | 335299.25 |
| 570.3185 |          |           | 1 | 66275.09  |
| 571.3207 |          |           | 1 | 7754.39   |
| 571.4074 |          |           | 2 | 844.77    |

| Compound Label                                          | m/z      | RT     | Algorithm  | Mass     |
|---------------------------------------------------------|----------|--------|------------|----------|
| Cpd 67: C <sub>28</sub> H <sub>52</sub> O <sub>14</sub> | 613.3431 | 18.359 | Auto MS/MS | 612.3356 |

Compound Chromatograms

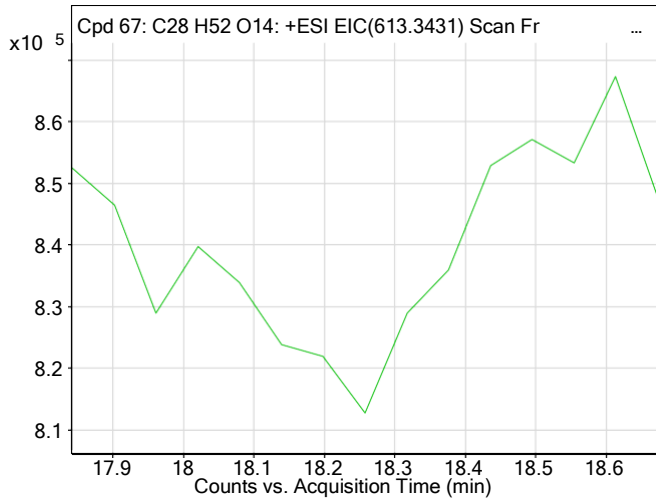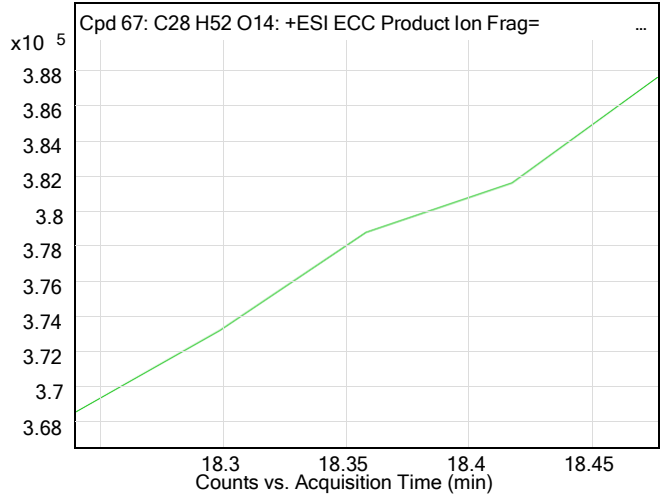

MS Spectrum

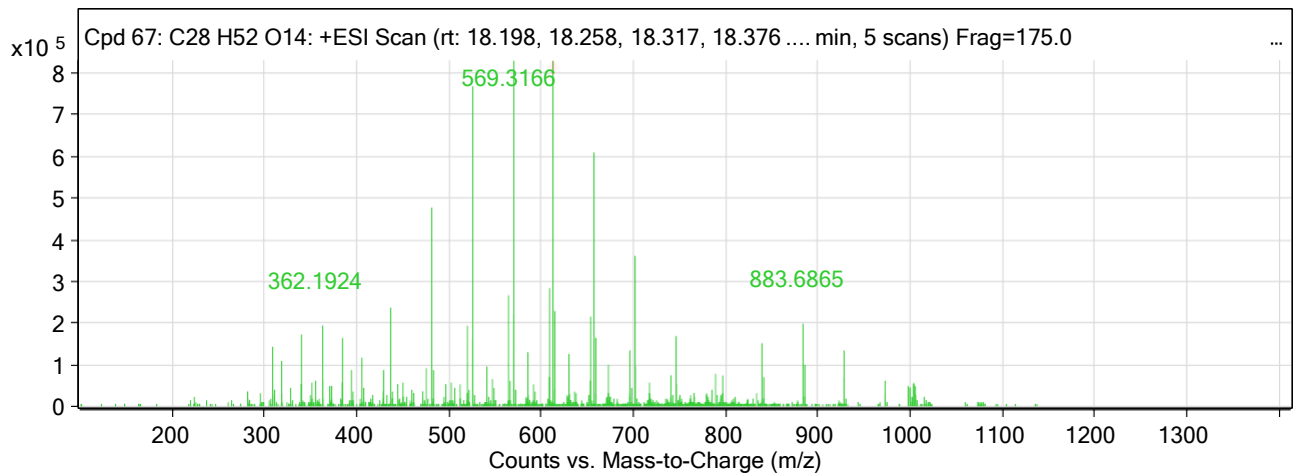

MS Zoomed Spectrum

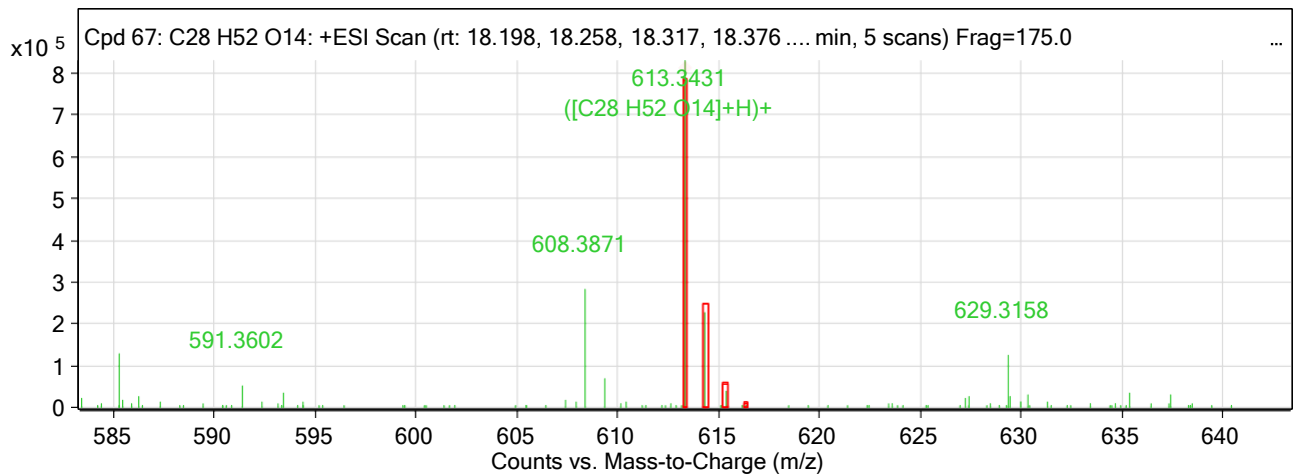

MS Spectrum Peak List

| m/z      | Calc m/z | Diff(ppm) | z | Abund     | Formula     | Ion    |
|----------|----------|-----------|---|-----------|-------------|--------|
| 481.2634 |          |           | 1 | 474407.75 |             |        |
| 525.2904 |          |           | 1 | 766626.19 |             |        |
| 569.3166 |          |           | 1 | 933279.19 |             |        |
| 608.3871 |          |           | 1 | 283249.41 |             |        |
| 613.3431 | 613.343  | -0.24     | 1 | 830543.88 | C28 H52 O14 | (M+H)+ |
| 614.3457 | 614.3464 | 1.17      | 1 | 225706.75 | C28 H52 O14 | (M+H)+ |
| 615.3476 | 615.3489 | 1.97      | 1 | 39549.45  | C28 H52 O14 | (M+H)+ |
| 616.3548 | 616.3515 | -5.36     | 1 | 5543.01   | C28 H52 O14 | (M+H)+ |

MSMS Spectrum

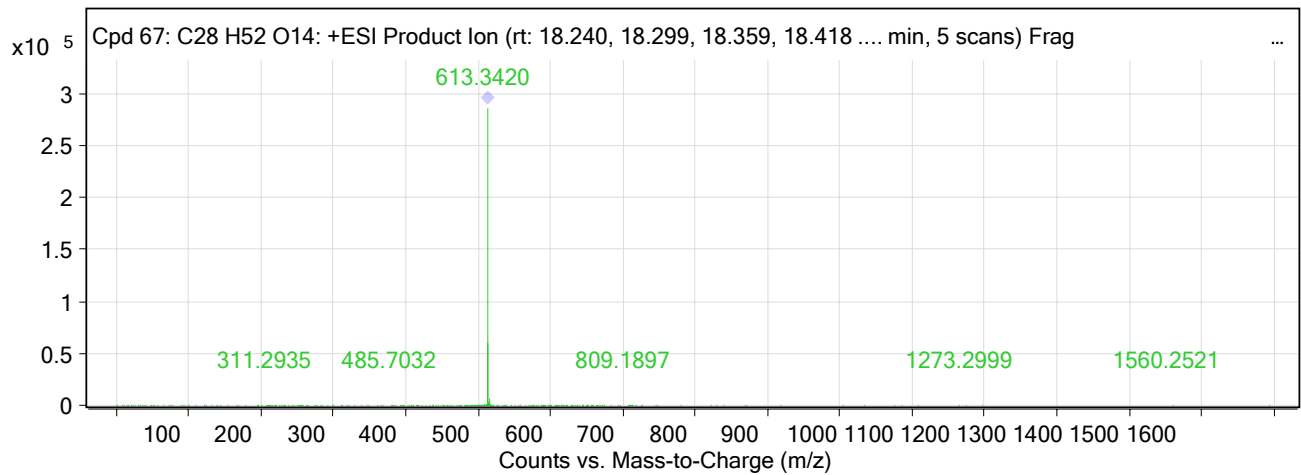

MS/MS Spectrum PeakList

| m/z      | Calc m/z | Diff(ppm) | z | Abund     |
|----------|----------|-----------|---|-----------|
| 309.2786 | 309.2788 | 0.67      | 1 | 72.33     |
| 612.3871 |          |           | 2 | 2623.38   |
| 612.6389 |          |           |   | 3152      |
| 612.8891 |          |           | 2 | 2734.38   |
| 613.14   |          |           | 1 | 1261.18   |
| 613.342  | 613.343  | 1.68      | 1 | 286248.44 |
| 614.3446 |          |           | 1 | 59301.96  |
| 615.1412 |          |           | 1 | 1005.97   |
| 615.347  |          |           | 1 | 7285.03   |
| 615.4246 |          |           | 2 | 923.83    |

| Compound Label                                                         | m/z      | RT    | Algorithm  | Mass     |
|------------------------------------------------------------------------|----------|-------|------------|----------|
| Cpd 68: C <sub>24</sub> H <sub>46</sub> N <sub>3</sub> O <sub>12</sub> | 569.3165 | 18.46 | Auto MS/MS | 568.3091 |

Compound Chromatograms

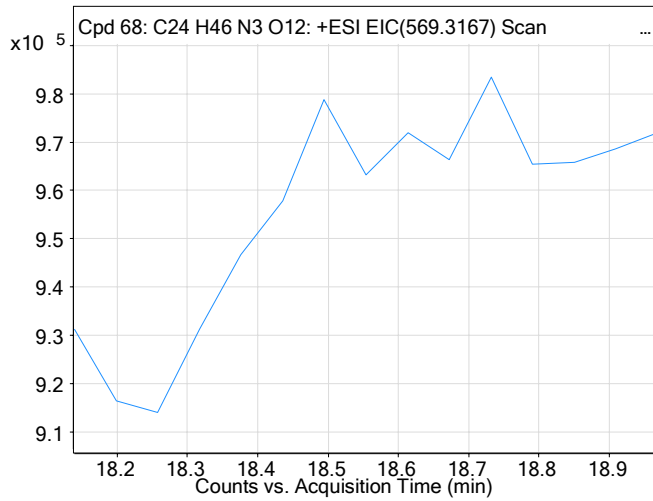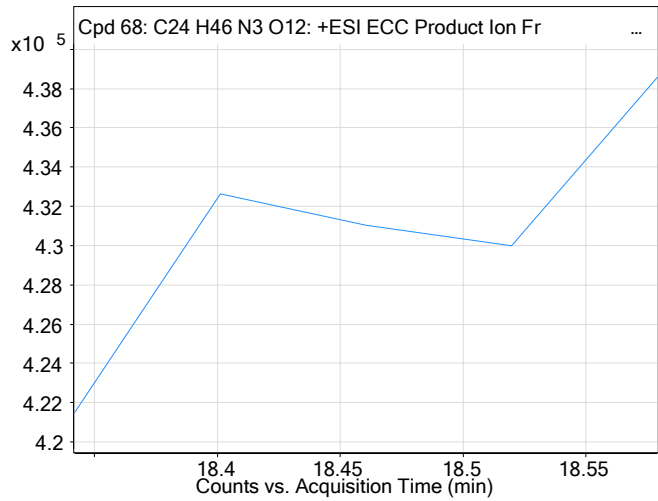

MS Spectrum

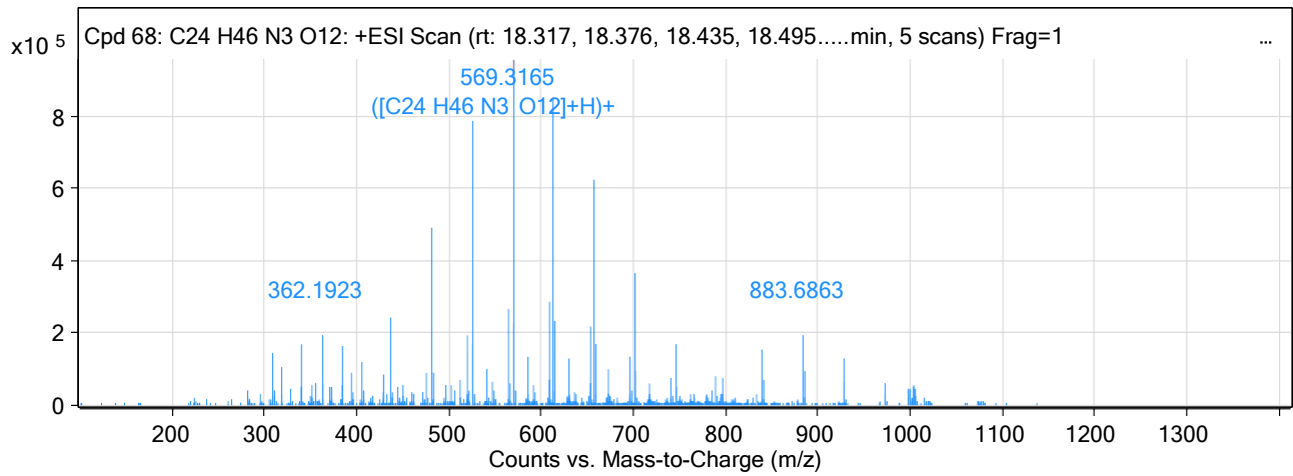

MS Zoomed Spectrum

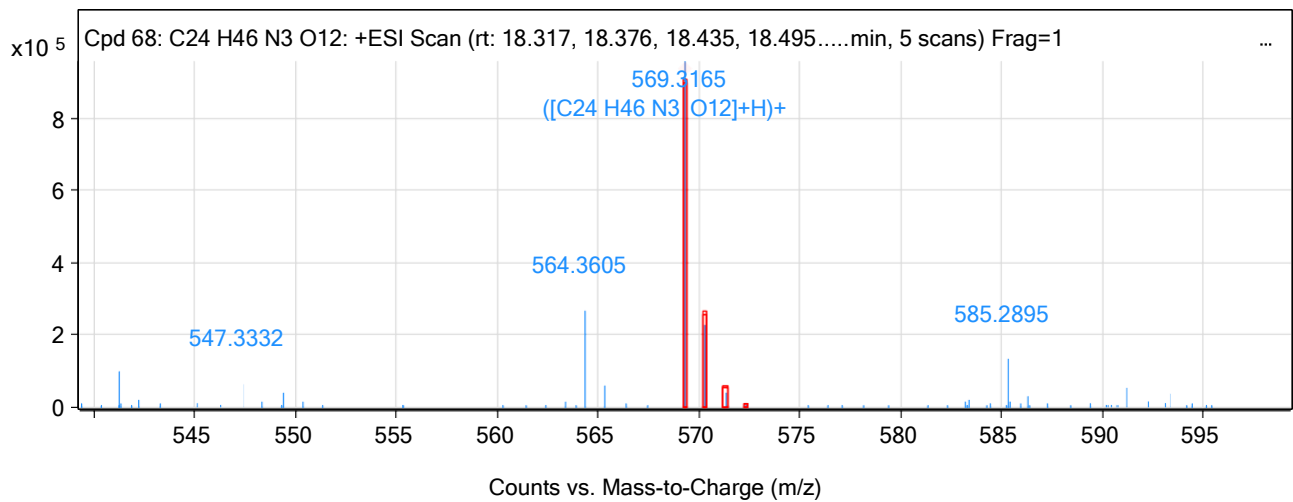

MS Spectrum Peak List

| m/z      | Calc m/z | Diff(ppm) | z | Abund     | Formula                                                        | Ion                |
|----------|----------|-----------|---|-----------|----------------------------------------------------------------|--------------------|
| 481.2633 |          |           | 1 | 486575.31 |                                                                |                    |
| 525.2903 |          |           | 1 | 782744.13 |                                                                |                    |
| 569.3165 | 569.3154 | -1.89     | 1 | 955572.19 | C <sub>24</sub> H <sub>46</sub> N <sub>3</sub> O <sub>12</sub> | (M+H) <sup>+</sup> |
| 570.3192 | 570.3186 | -1.02     | 1 | 225768.09 | C <sub>24</sub> H <sub>46</sub> N <sub>3</sub> O <sub>12</sub> | (M+H) <sup>+</sup> |
| 571.3213 | 571.3209 | -0.61     | 1 | 38387.57  | C <sub>24</sub> H <sub>46</sub> N <sub>3</sub> O <sub>12</sub> | (M+H) <sup>+</sup> |
| 572.3238 | 572.3235 | -0.42     | 1 | 5402.2    | C <sub>24</sub> H <sub>46</sub> N <sub>3</sub> O <sub>12</sub> | (M+H) <sup>+</sup> |
| 608.3869 |          |           | 1 | 285653.84 |                                                                |                    |
| 613.343  |          |           | 1 | 845679.38 |                                                                |                    |
| 657.369  |          |           | 1 | 620297.19 |                                                                |                    |
| 701.3951 |          |           | 1 | 366203.59 |                                                                |                    |

MSMS Spectrum

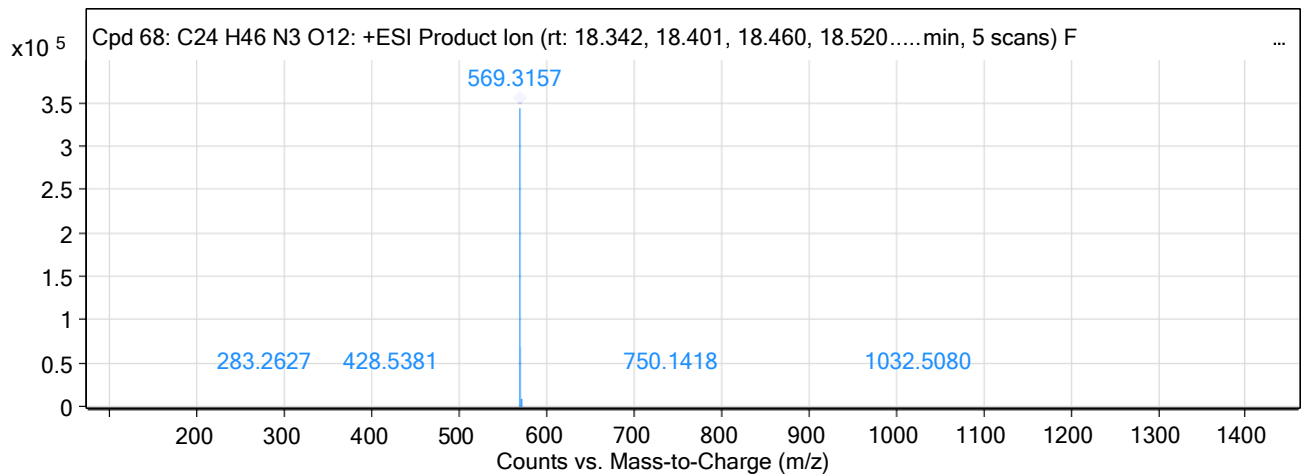

**MS/MS Spectrum Peak List**

| m/z      | Calc m/z | Diff(ppm) | z | Abund     |
|----------|----------|-----------|---|-----------|
| 133.0859 | 133.0859 | 0.08      |   | 46.51     |
| 175.1312 | 175.1315 | 1.61      |   | 17.58     |
| 177.1109 | 177.1108 | -0.46     |   | 30.93     |
| 275.1586 | 275.1601 | 5.75      |   | 22.36     |
| 283.2627 | 283.2632 | 1.72      |   | 30.48     |
| 309.2761 | 309.2775 | 4.28      |   | 29.33     |
| 510.2696 | 510.2671 | -4.89     |   | 17.67     |
| 513.2501 | 513.2528 | 5.39      |   | 21.71     |
| 533.3213 | 533.3154 | -11.01    | 1 | 133.12    |
| 569.3157 | 569.3154 | -0.43     | 1 | 343641.16 |

| Compound Label      | m/z      | RT     | Algorithm  | Mass     |
|---------------------|----------|--------|------------|----------|
| Cpd 69: C28 H52 O14 | 613.3431 | 18.655 | Auto MS/MS | 612.3356 |

**Compound Chromatograms**

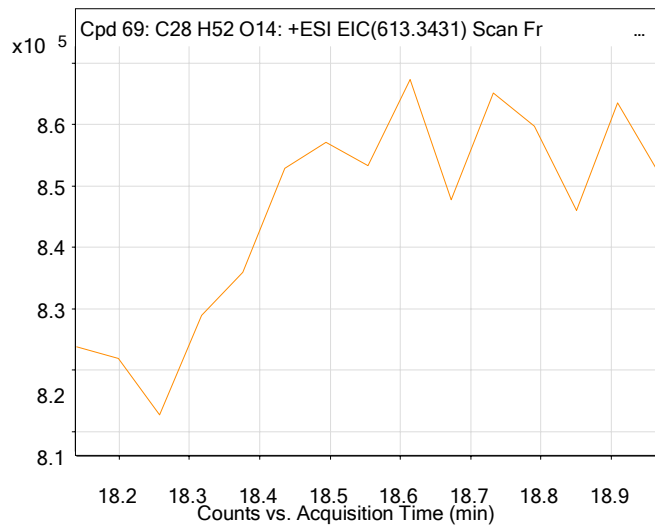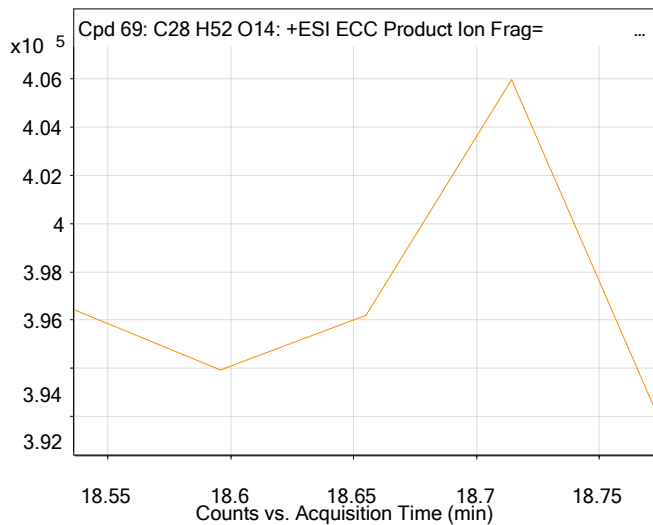

**MS Spectrum**

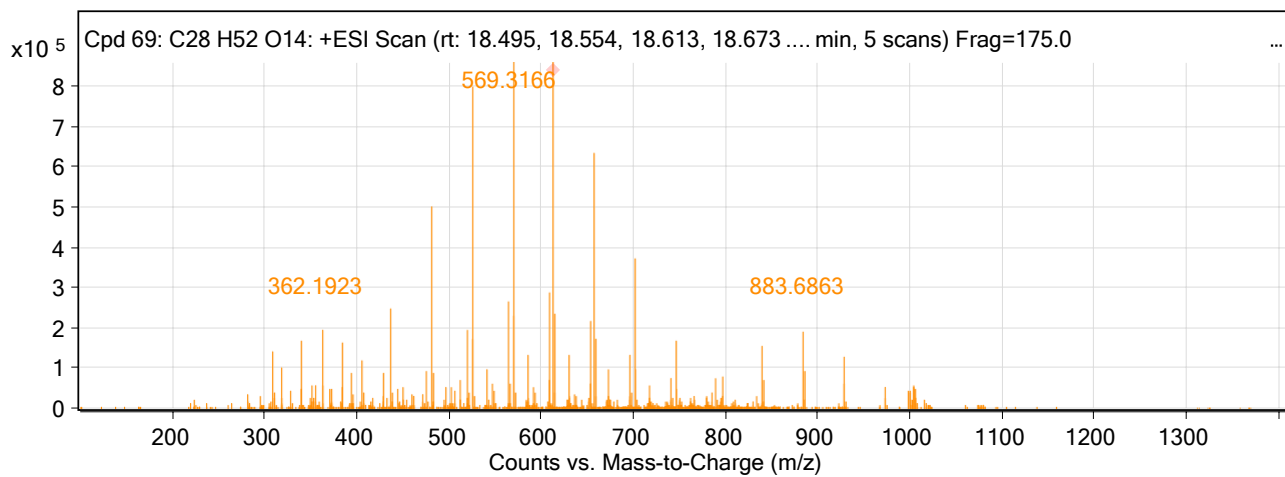

**MS Zoomed Spectrum**

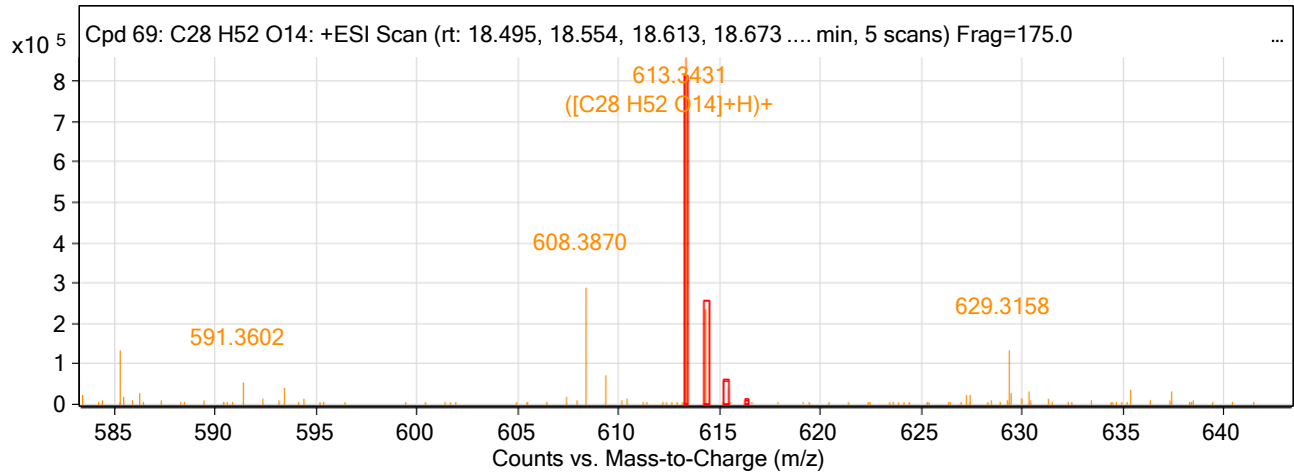

**MS Spectrum Peak List**

| m/z      | Calc m/z | Diff(ppm) | z | Abund     | Formula     | Ion    |
|----------|----------|-----------|---|-----------|-------------|--------|
| 481.2634 |          |           | 1 | 500254.44 |             |        |
| 525.2903 |          |           | 1 | 796595.44 |             |        |
| 569.3166 |          |           | 1 | 972753.63 |             |        |
| 608.387  |          |           | 1 | 288078.69 |             |        |
| 613.3431 | 613.343  | -0.14     | 1 | 858146.5  | C28 H52 O14 | (M+H)+ |
| 614.3457 | 614.3464 | 1.22      | 1 | 233178.63 | C28 H52 O14 | (M+H)+ |
| 615.3476 | 615.3489 | 2.08      | 1 | 42080.64  | C28 H52 O14 | (M+H)+ |
| 616.3551 | 616.3515 | -5.72     | 1 | 5899.26   | C28 H52 O14 | (M+H)+ |
| 657.3691 |          |           | 1 | 633993.44 |             |        |
| 701.3952 |          |           | 1 | 372688.16 |             |        |

**MS/MS Spectrum**

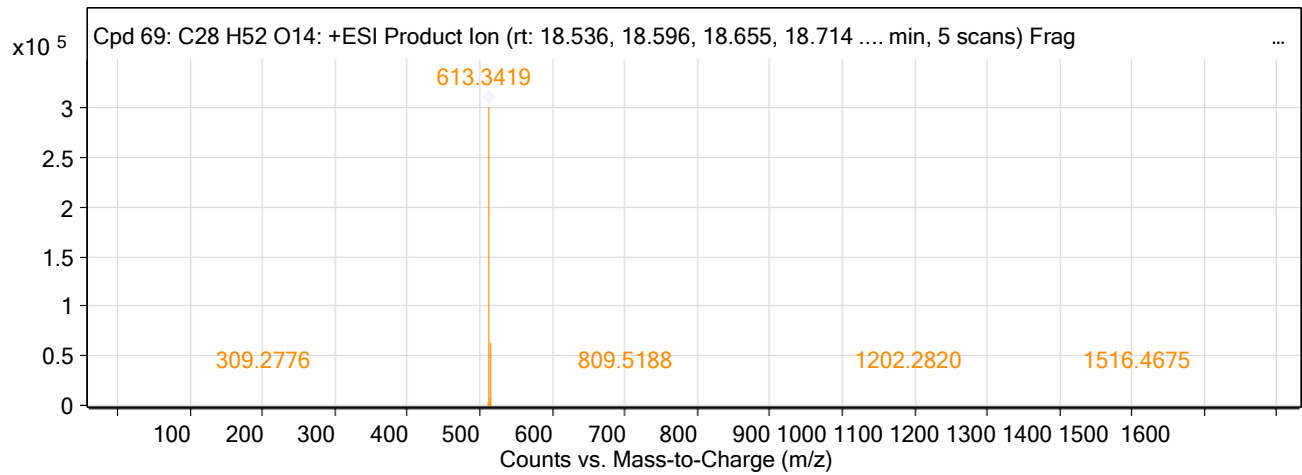

**MS/MS Spectrum Peak List**

| m/z      | Calc m/z | Diff(ppm) | z | Abund     |
|----------|----------|-----------|---|-----------|
| 117.0911 | 117.091  | -1.12     |   | 41.13     |
| 309.2776 | 309.2788 | 4.02      |   | 104.61    |
| 311.2936 | 311.2945 | 2.66      | 1 | 95.57     |
| 612.3882 |          |           | 2 | 2598.53   |
| 612.6389 |          |           | 2 | 3131.89   |
| 612.8892 |          |           | 2 | 2535.5    |
| 613.1391 |          |           | 2 | 1406.79   |
| 613.3419 | 613.343  | 1.79      | 1 | 301087.75 |
| 614.3446 |          |           | 1 | 63135.57  |
| 615.3469 |          |           | 1 | 7681.89   |

| Compound Label         | m/z      | RT     | Algorithm  | Mass     |
|------------------------|----------|--------|------------|----------|
| Cpd 70: C24 H46 N3 O12 | 569.3166 | 18.757 | Auto MS/MS | 568.3092 |

**Compound Chromatograms**

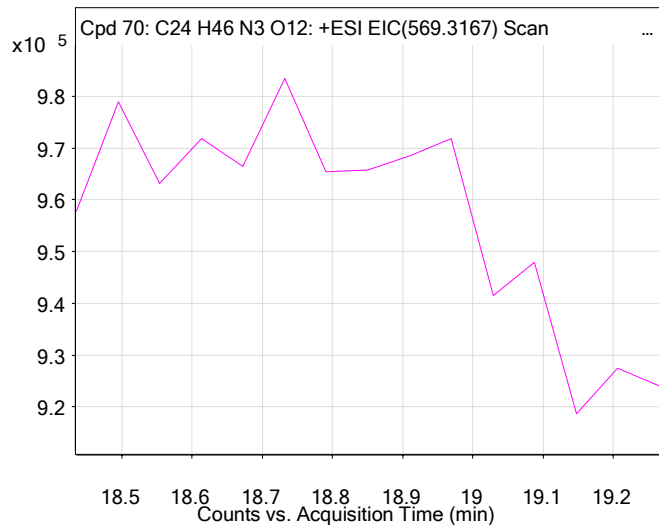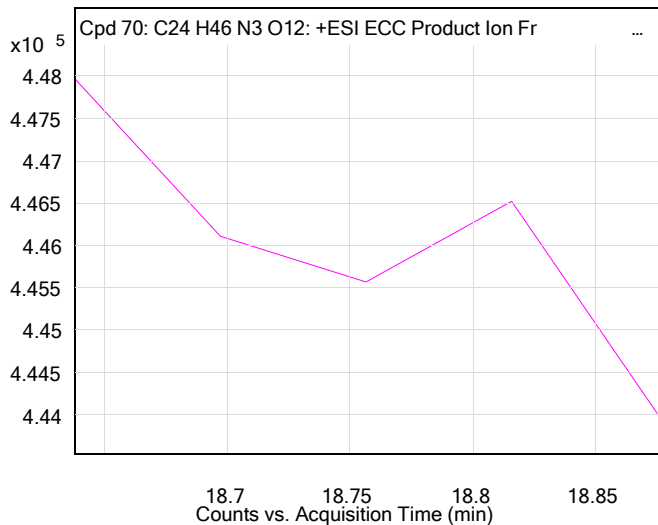

MS Spectrum

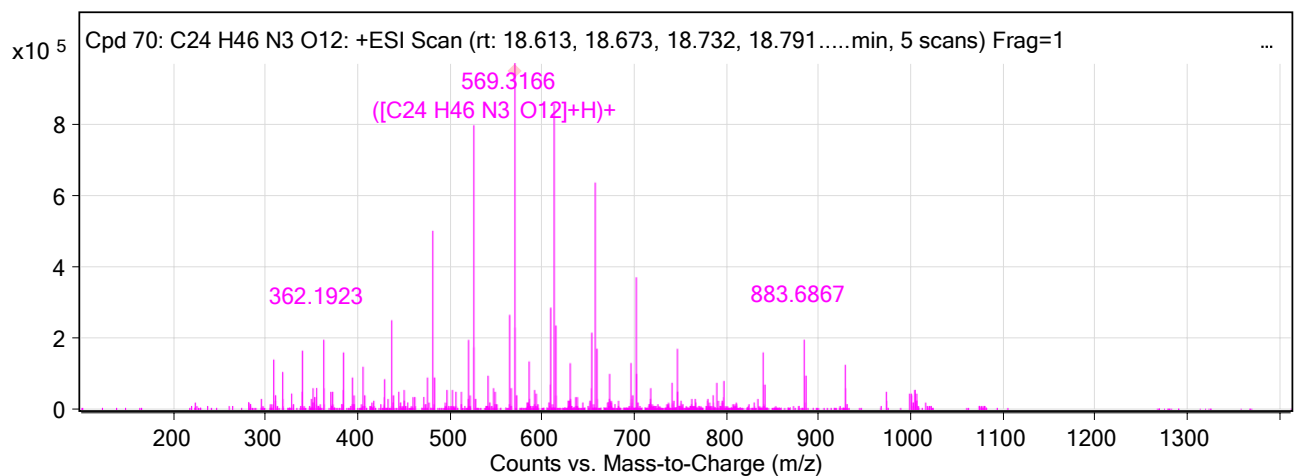

MS Zoomed Spectrum

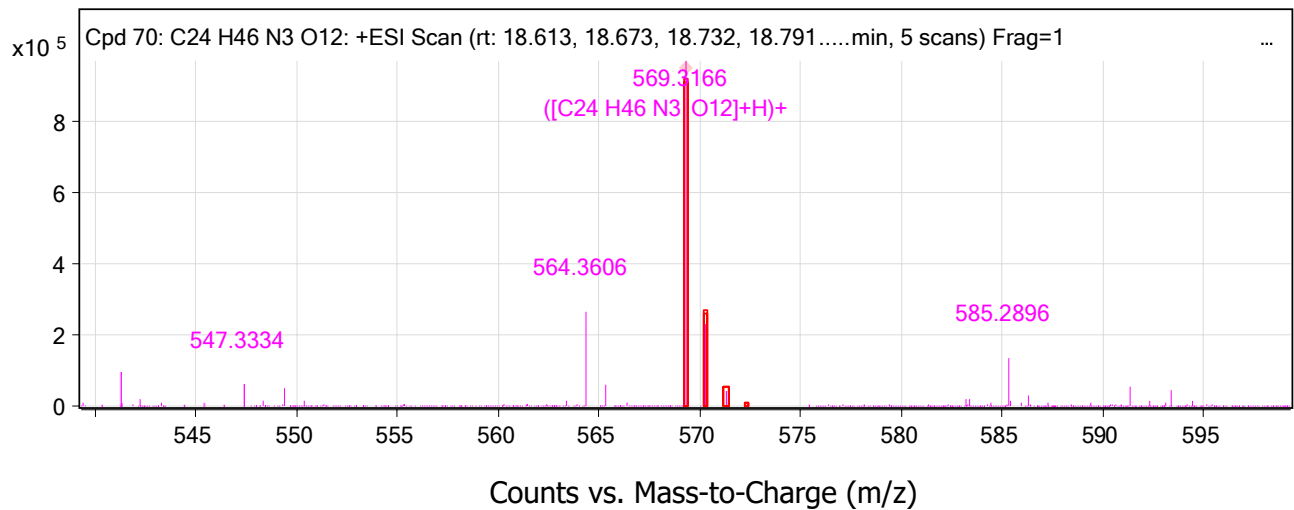

MS Spectrum Peak List

| m/z      | Calc m/z | Diff(ppm) | z | Abund     | Formula                                                        | Ion    |
|----------|----------|-----------|---|-----------|----------------------------------------------------------------|--------|
| 481.2634 |          |           | 1 | 501283.59 |                                                                |        |
| 525.2903 |          |           | 1 | 794213.06 |                                                                |        |
| 569.3166 | 569.3154 | -2.14     | 1 | 970616.38 | C <sub>24</sub> H <sub>46</sub> N <sub>3</sub> O <sub>12</sub> | (M+H)+ |
| 570.3193 | 570.3186 | -1.25     | 1 | 228159.33 | C <sub>24</sub> H <sub>46</sub> N <sub>3</sub> O <sub>12</sub> | (M+H)+ |
| 571.3214 | 571.3209 | -0.86     | 1 | 38808.07  | C <sub>24</sub> H <sub>46</sub> N <sub>3</sub> O <sub>12</sub> | (M+H)+ |
| 572.3243 | 572.3235 | -1.29     | 1 | 5550.11   | C <sub>24</sub> H <sub>46</sub> N <sub>3</sub> O <sub>12</sub> | (M+H)+ |
| 608.3871 |          |           | 1 | 286012.56 |                                                                |        |
| 613.3432 |          |           | 1 | 857215.81 |                                                                |        |
| 657.3692 |          |           | 1 | 635595.81 |                                                                |        |



MSMS Spectrum

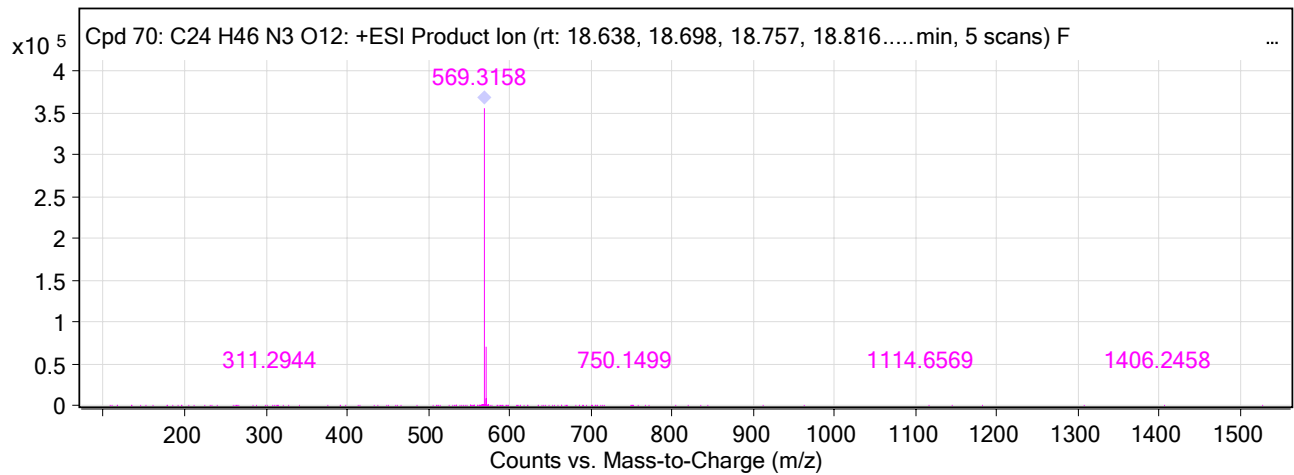

MS/MS Spectrum PeakList

| m/z      | Calc m/z | Diff(ppm) | z | Abund     |
|----------|----------|-----------|---|-----------|
| 108.0863 | 108.0808 | -50.89    |   | 20.95     |
| 144.0794 | 144.0781 | -9.39     |   | 16.67     |
| 195.1221 | 195.1214 | -3.75     |   | 22.58     |
| 195.9877 | 195.985  | -13.96    |   | 33.69     |
| 264.1953 | 264.1958 | 1.94      |   | 16.1      |
| 287.1865 | 287.1853 | -4.12     |   | 22.37     |
| 311.2944 | 311.2945 | 0.05      |   | 54.31     |
| 412.2986 | 412.3017 | 7.68      |   | 17.38     |
| 533.3227 | 533.3154 | -13.58    | 1 | 66.36     |
| 569.3158 | 569.3154 | -0.63     | 1 | 355951.53 |

| Compound Label      | m/z      | RT     | Algorithm  | Mass     |
|---------------------|----------|--------|------------|----------|
| Cpd 71: C28 H52 O14 | 613.3431 | 18.951 | Auto MS/MS | 612.3357 |

Compound Chromatograms

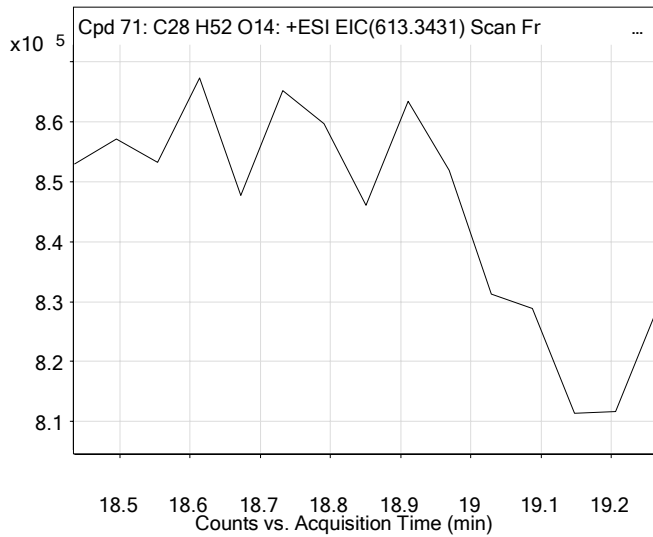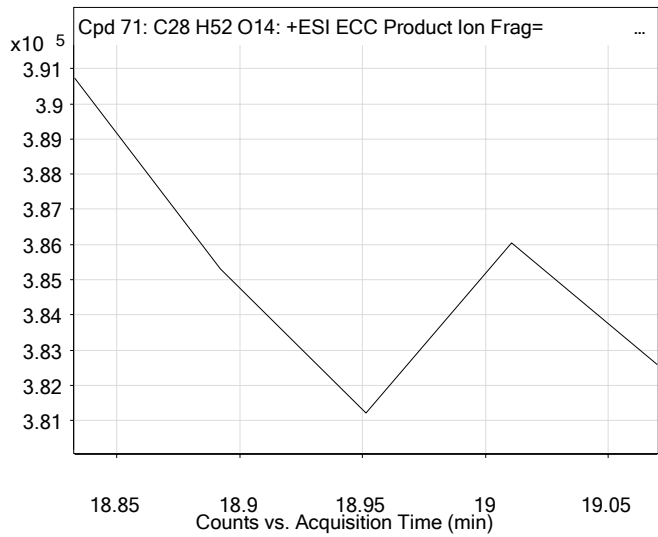

MS Spectrum

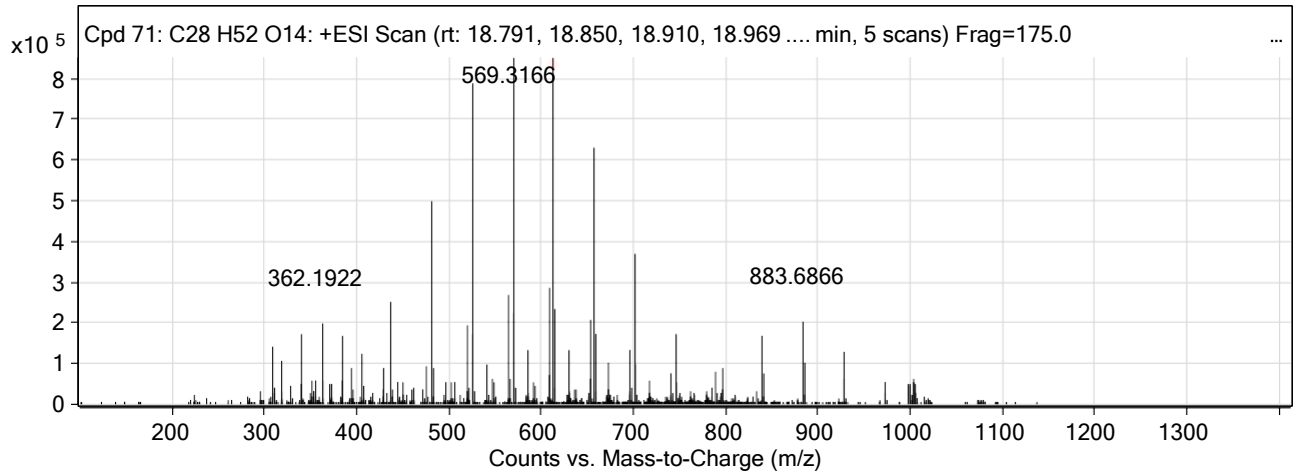

MS Zoomed Spectrum

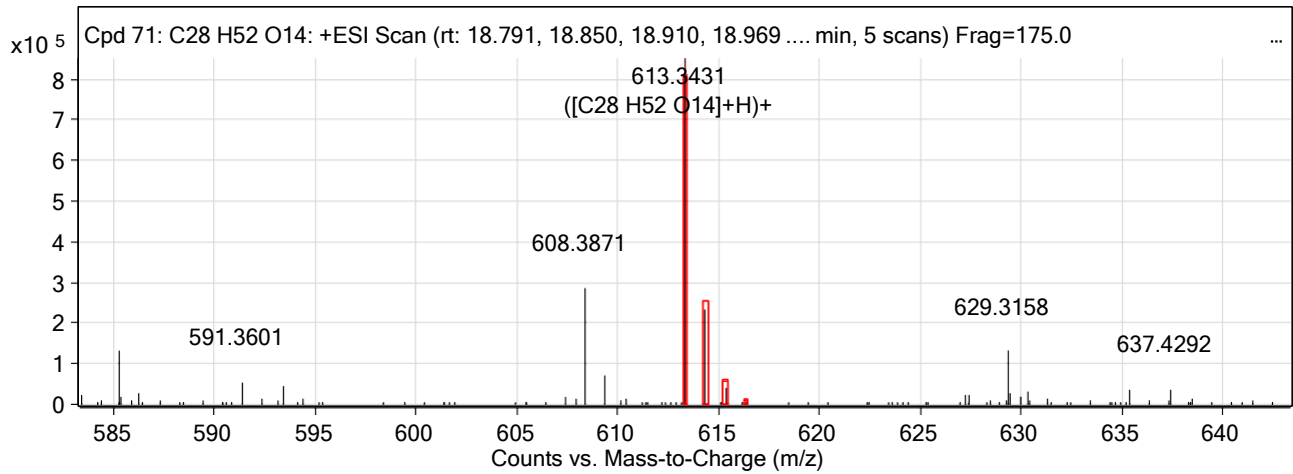

MS Spectrum Peak List

| m/z      | Calc m/z | Diff(ppm) | z | Abund     | Formula     | Ion    |
|----------|----------|-----------|---|-----------|-------------|--------|
| 481.2634 |          |           | 1 | 494913.94 |             |        |
| 525.2903 |          |           | 1 | 785217.5  |             |        |
| 569.3166 |          |           | 1 | 962696.5  |             |        |
| 608.3871 |          |           | 1 | 284059.41 |             |        |
| 613.3431 | 613.343  | -0.27     | 1 | 850508.81 | C28 H52 O14 | (M+H)+ |
| 614.3457 | 614.3464 | 1.17      | 1 | 232425.7  | C28 H52 O14 | (M+H)+ |
| 615.3476 | 615.3489 | 1.97      | 1 | 41270.75  | C28 H52 O14 | (M+H)+ |
| 616.3538 | 616.3515 | -3.72     | 1 | 6052.58   | C28 H52 O14 | (M+H)+ |
| 657.3692 |          |           | 1 | 627421.81 |             |        |
| 701.3953 |          |           | 1 | 367611.69 |             |        |

MSMS Spectrum

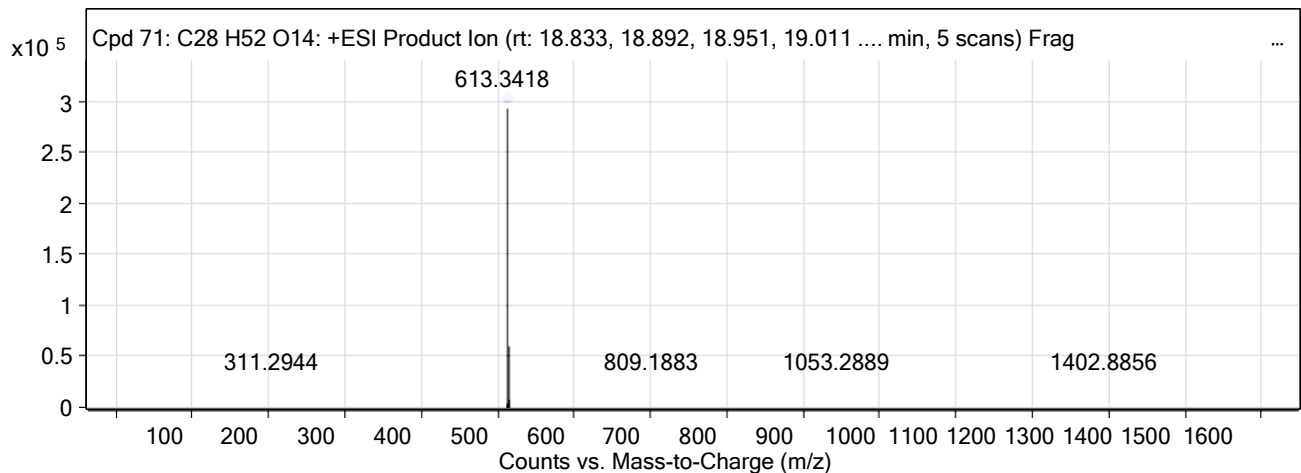

**MS/MS Spectrum Peak List**

| m/z      | Calc m/z | Diff(ppm)  | z | Abund     |
|----------|----------|------------|---|-----------|
| 133.0856 | 133.0859 | 2.04       |   | 90.52     |
| 309.2797 | 309.2788 | -2.81      |   | 50.3      |
| 311.2944 | 311.2945 | 0.19       | 1 | 105.22    |
| 357.0666 | 357.0664 | -0.55      |   | 56.3      |
| 609.3047 | 304.6556 | -499994.69 | 2 | 42.72     |
| 612.3876 |          |            | 2 | 2706.39   |
| 612.6381 |          |            |   | 3273.33   |
| 613.3418 | 613.343  | 1.91       | 1 | 292827.75 |
| 614.3446 |          |            | 1 | 60240.28  |
| 615.3469 |          |            | 1 | 7703.74   |

| Compound Label         | m/z      | RT     | Algorithm  | Mass     |
|------------------------|----------|--------|------------|----------|
| Cpd 72: C24 H46 N3 O12 | 569.3166 | 19.053 | Auto MS/MS | 568.3092 |

**Compound Chromatograms**

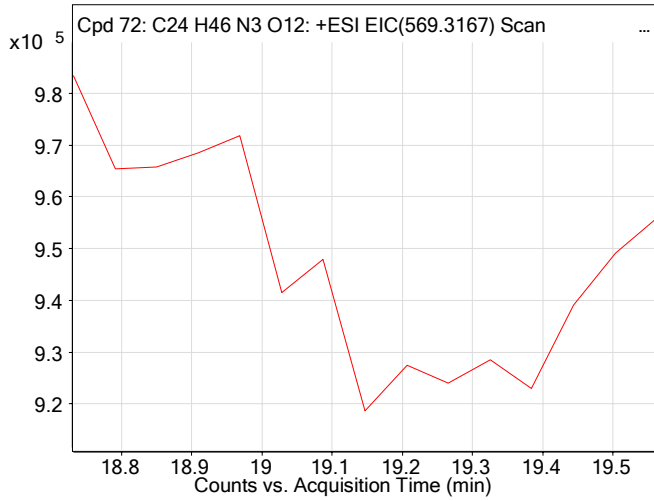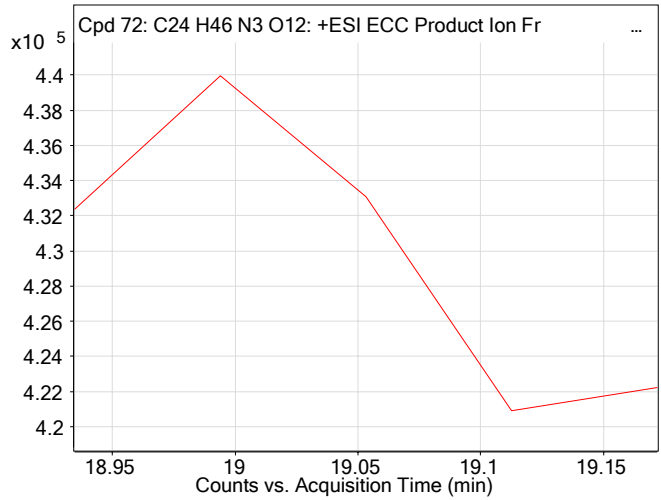

MS Spectrum

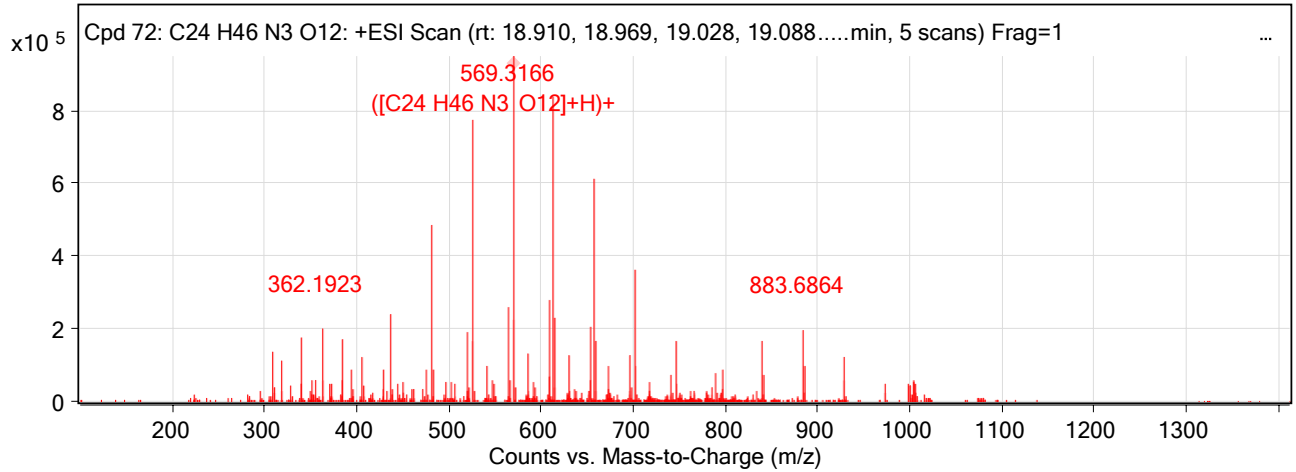

MS Zoomed Spectrum

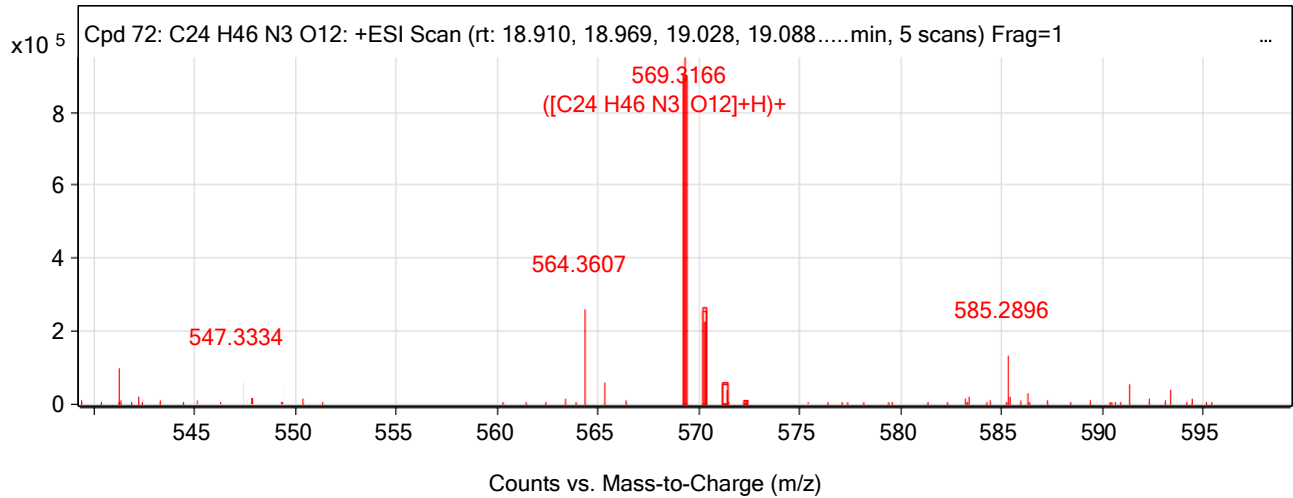

**MS Spectrum Peak List**

| m/z      | Calc m/z | Diff(ppm) | z | Abund     | Formula                                                        | Ion                |
|----------|----------|-----------|---|-----------|----------------------------------------------------------------|--------------------|
| 481.2634 |          |           | 1 | 484513.91 |                                                                |                    |
| 525.2904 |          |           | 1 | 774252.88 |                                                                |                    |
| 569.3166 | 569.3154 | -2.15     | 1 | 949752.31 | C <sub>24</sub> H <sub>46</sub> N <sub>3</sub> O <sub>12</sub> | (M+H) <sup>+</sup> |
| 570.3193 | 570.3186 | -1.22     | 1 | 224682    | C <sub>24</sub> H <sub>46</sub> N <sub>3</sub> O <sub>12</sub> | (M+H) <sup>+</sup> |
| 571.3214 | 571.3209 | -0.73     | 1 | 37767.02  | C <sub>24</sub> H <sub>46</sub> N <sub>3</sub> O <sub>12</sub> | (M+H) <sup>+</sup> |
| 572.3242 | 572.3235 | -1.13     | 1 | 5356.59   | C <sub>24</sub> H <sub>46</sub> N <sub>3</sub> O <sub>12</sub> | (M+H) <sup>+</sup> |
| 608.3871 |          |           | 1 | 278416.25 |                                                                |                    |
| 613.3431 |          |           | 1 | 837392    |                                                                |                    |
| 657.3691 |          |           | 1 | 611239.38 |                                                                |                    |
| 701.3953 |          |           | 1 | 361517.56 |                                                                |                    |

MSMS Spectrum

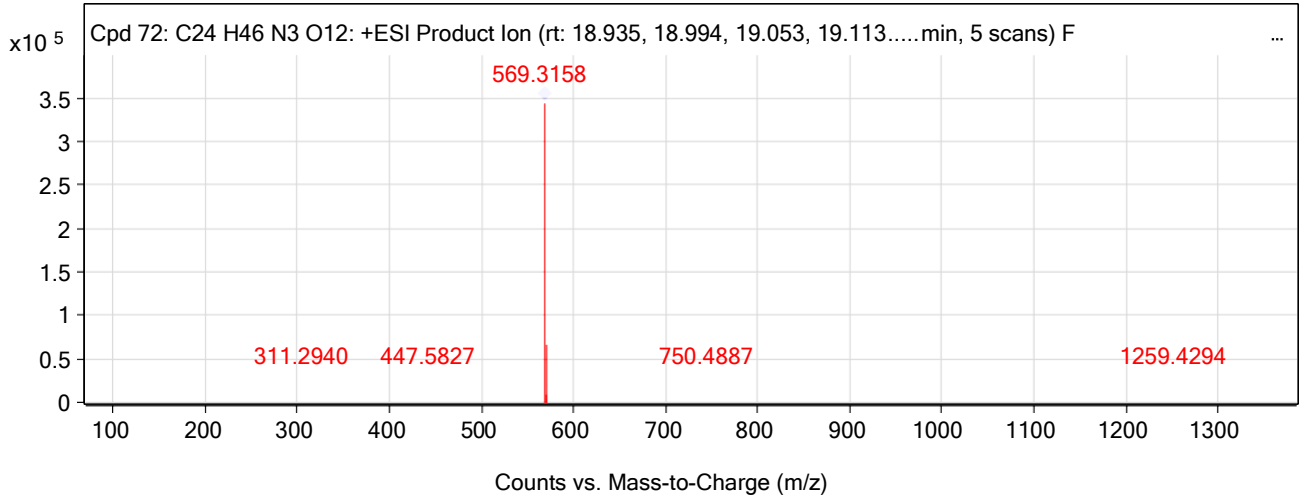

**MS/MS Spectrum Peak List**

| m/z      | Calc m/z | Diff(ppm) | z | Abund     |
|----------|----------|-----------|---|-----------|
| 117.0909 | 117.091  | 0.63      |   | 26.76     |
| 133.0866 | 133.0859 | -4.82     |   | 35.61     |
| 177.1111 | 177.1108 | -1.42     |   | 28.56     |
| 195.122  | 195.1214 | -3.15     |   | 15.99     |
| 195.146  | 195.1492 | 16.58     |   | 16.2      |
| 307.1739 | 307.1738 | -0.22     |   | 14.4      |
| 311.294  | 311.2945 | 1.33      |   | 50.57     |
| 312.2973 | 312.3009 | 11.73     |   | 21.65     |
| 371.2245 | 371.2262 | 4.74      |   | 19.67     |
| 569.3158 | 569.3154 | -0.65     | 1 | 343717.03 |

| Compound Label                                          | m/z      | RT     | Algorithm  | Mass     |
|---------------------------------------------------------|----------|--------|------------|----------|
| Cpd 73: C <sub>28</sub> H <sub>52</sub> O <sub>14</sub> | 613.3429 | 19.248 | Auto MS/MS | 612.3354 |

Compound Chromatograms

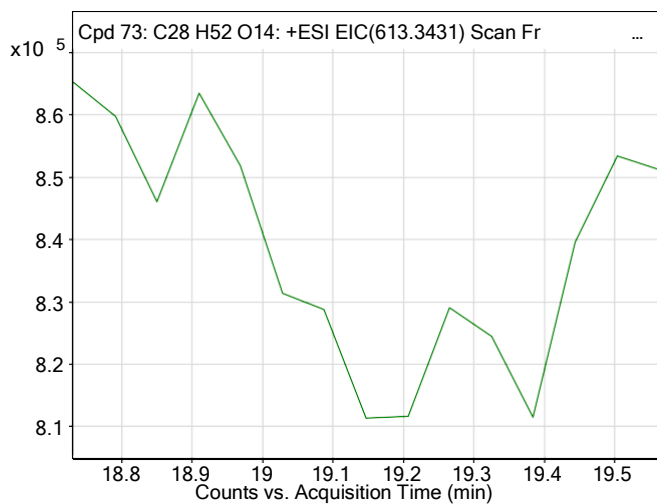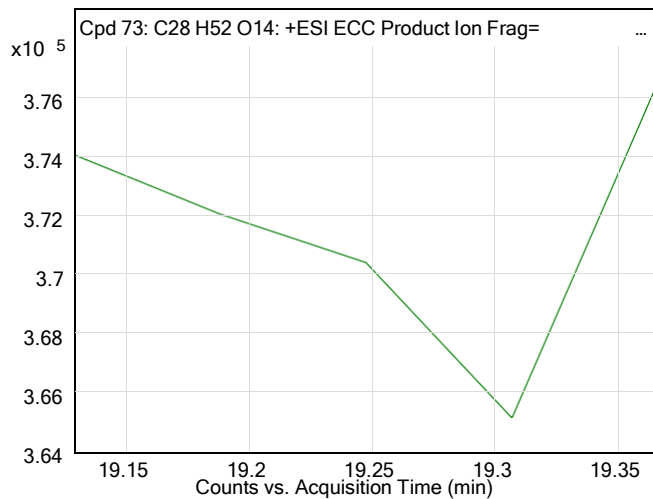

MS Spectrum

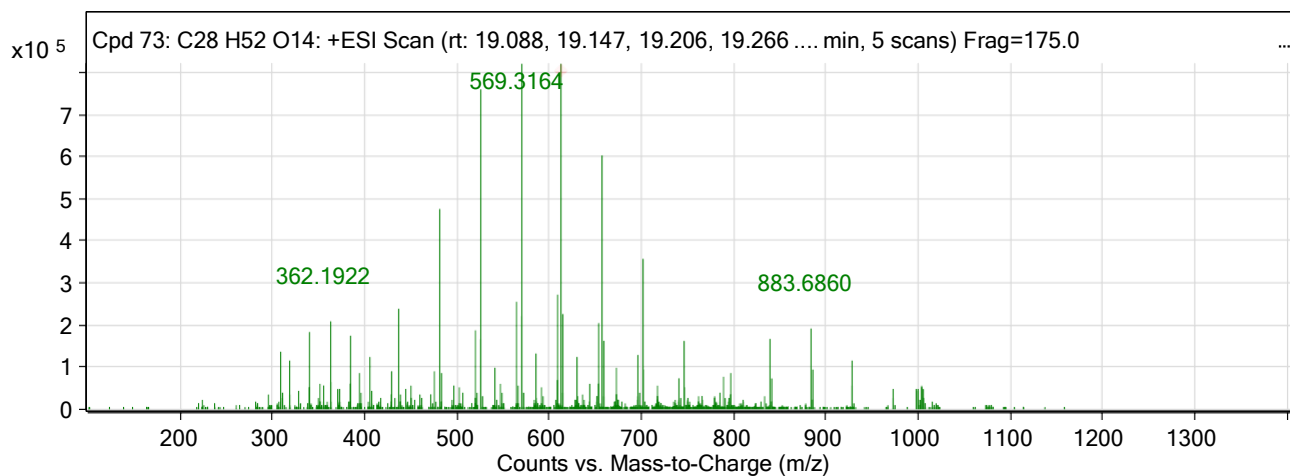

MS Zoomed Spectrum

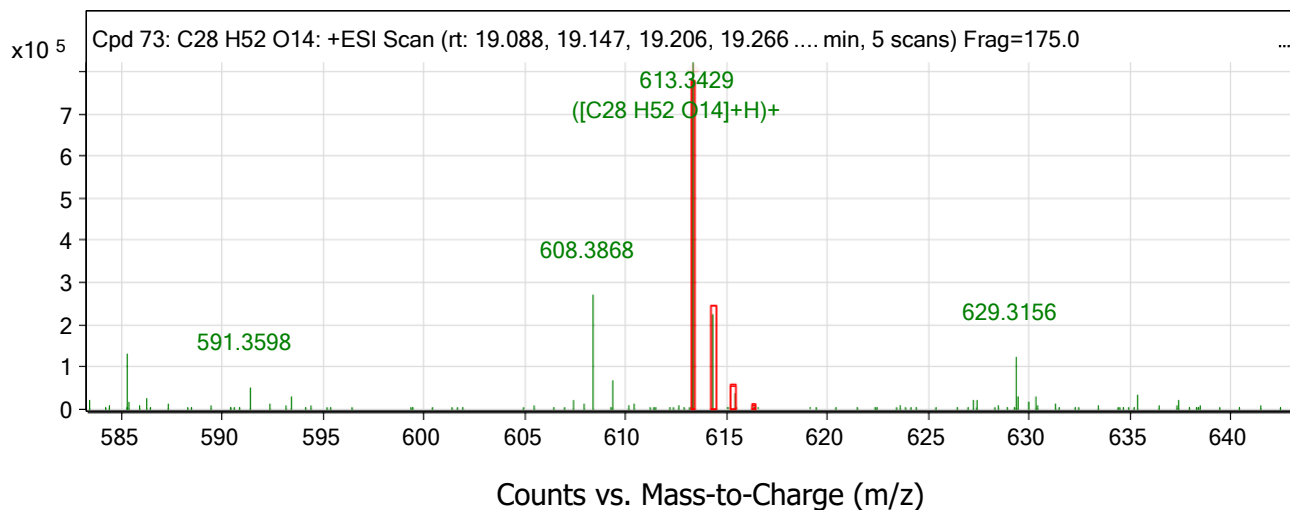

MS Spectrum Peak List

| m/z      | Calc m/z | Diff(ppm) | z | Abund     | Formula     | Ion    |
|----------|----------|-----------|---|-----------|-------------|--------|
| 481.2632 |          |           | 1 | 474488.19 |             |        |
| 525.2902 |          |           | 1 | 757965.38 |             |        |
| 569.3164 |          |           | 1 | 929368.38 |             |        |
| 608.3868 |          |           | 1 | 272291.59 |             |        |
| 613.3429 | 613.343  | 0.14      | 1 | 821093.81 | C28 H52 O14 | (M+H)+ |
| 614.3455 | 614.3464 | 1.55      | 1 | 223164.05 | C28 H52 O14 | (M+H)+ |
| 615.3474 | 615.3489 | 2.29      | 1 | 39371.34  | C28 H52 O14 | (M+H)+ |
| 616.3553 | 616.3515 | -6.11     | 1 | 5464.25   | C28 H52 O14 | (M+H)+ |

MSMS Spectrum

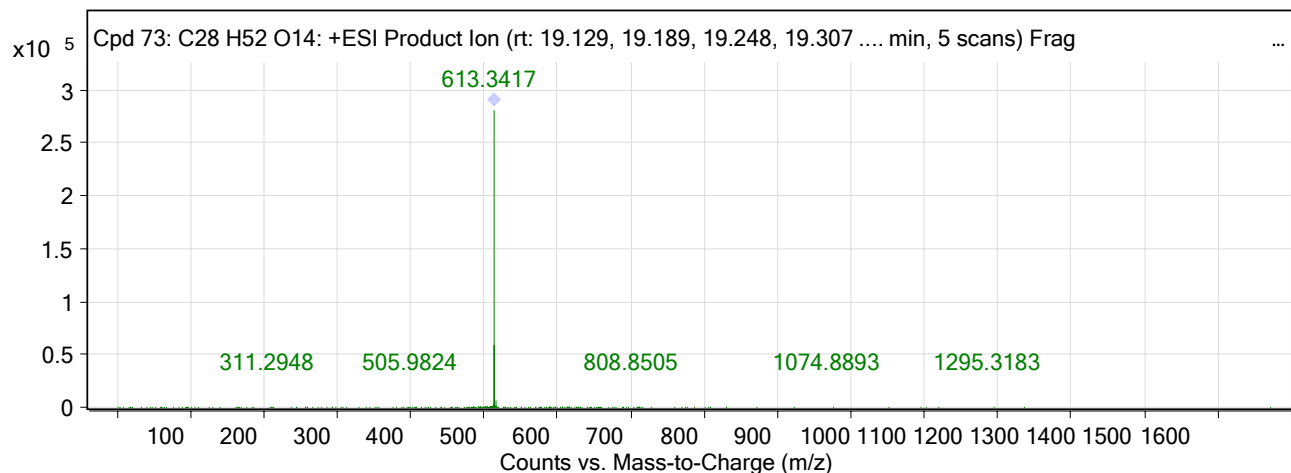

MS/MS Spectrum PeakList

| m/z      | Calc m/z | Diff(ppm) | z | Abund     |
|----------|----------|-----------|---|-----------|
| 311.2948 | 311.2945 | -1.23     |   | 86.26     |
| 312.2977 | 312.3023 | 14.79     |   | 50.95     |
| 357.0689 | 357.0664 | -7.13     | 1 | 40.89     |
| 612.3875 |          |           | 2 | 2479.21   |
| 612.6384 |          |           | 2 | 3085.39   |
| 612.8885 |          |           | 2 | 2631.04   |
| 613.1406 |          |           | 2 | 1446.79   |
| 613.3417 | 613.343  | 2.11      | 1 | 281031.31 |
| 614.3444 |          |           | 1 | 59240.95  |
| 615.3467 |          |           | 1 | 7176.95   |

| Compound Label                                                         | m/z      | RT    | Algorithm  | Mass     |
|------------------------------------------------------------------------|----------|-------|------------|----------|
| Cpd 74: C <sub>24</sub> H <sub>46</sub> N <sub>3</sub> O <sub>12</sub> | 569.3163 | 19.35 | Auto MS/MS | 568.3089 |

Compound Chromatograms

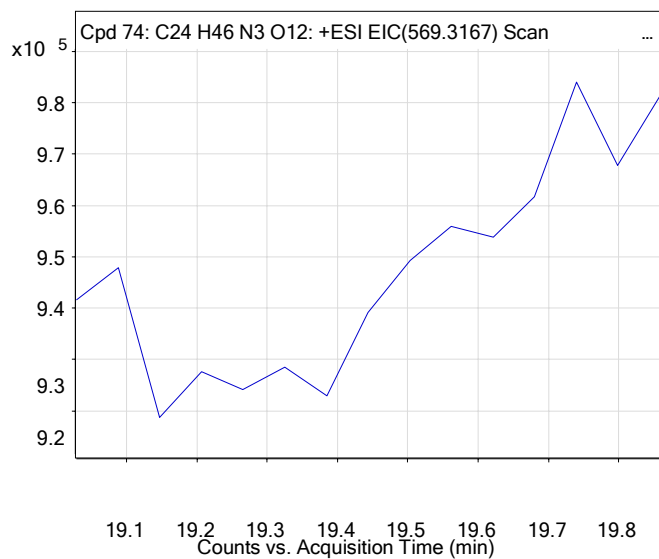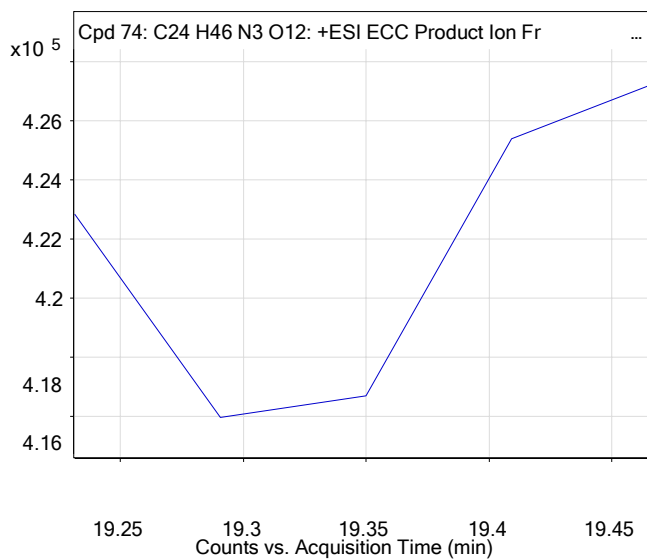

MS Spectrum

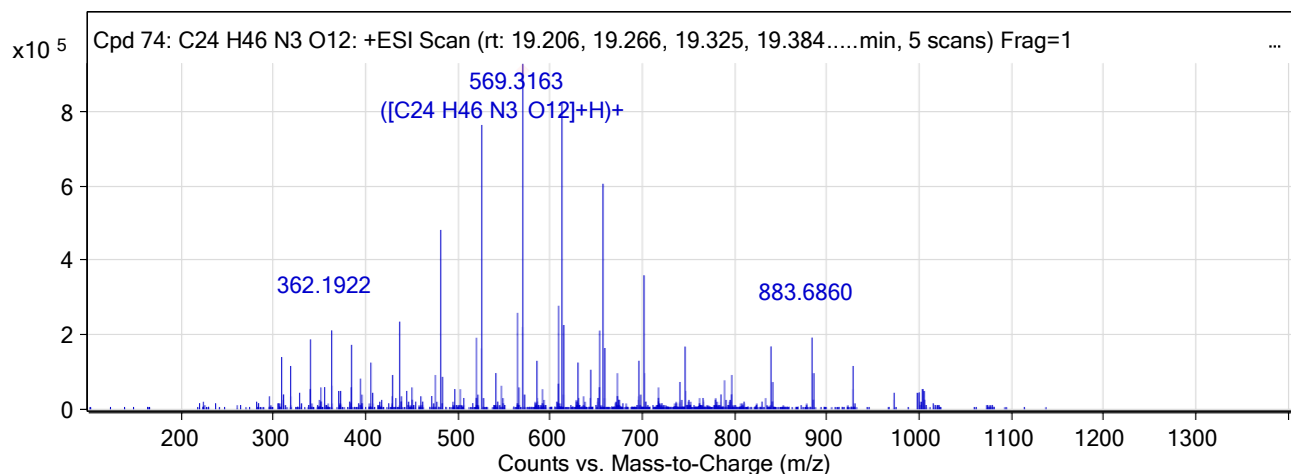

MS Zoomed Spectrum

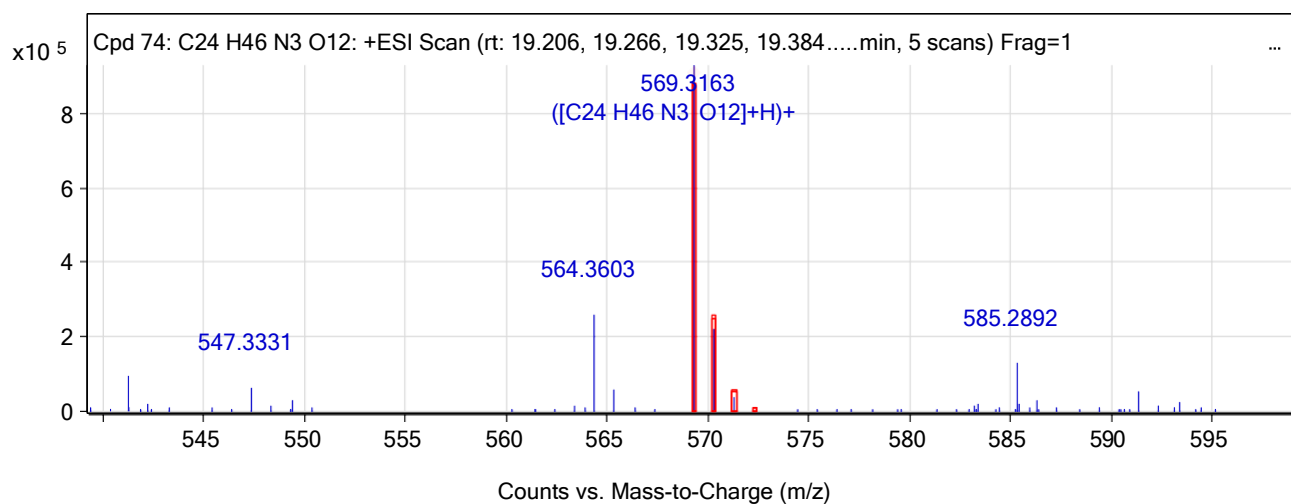

MS Spectrum Peak List

| m/z      | Calc m/z | Diff(ppm) | z | Abund     | Formula                                                        | Ion                |
|----------|----------|-----------|---|-----------|----------------------------------------------------------------|--------------------|
| 481.2632 |          |           | 1 | 478007    |                                                                |                    |
| 525.2901 |          |           | 1 | 759178.31 |                                                                |                    |
| 569.3163 | 569.3154 | -1.55     | 1 | 928466.31 | C <sub>24</sub> H <sub>46</sub> N <sub>3</sub> O <sub>12</sub> | (M+H) <sup>+</sup> |
| 570.319  | 570.3186 | -0.71     | 1 | 221630.09 | C <sub>24</sub> H <sub>46</sub> N <sub>3</sub> O <sub>12</sub> | (M+H) <sup>+</sup> |
| 571.3211 | 571.3209 | -0.25     | 1 | 37321.54  | C <sub>24</sub> H <sub>46</sub> N <sub>3</sub> O <sub>12</sub> | (M+H) <sup>+</sup> |
| 572.3238 | 572.3235 | -0.42     | 1 | 5126.16   | C <sub>24</sub> H <sub>46</sub> N <sub>3</sub> O <sub>12</sub> | (M+H) <sup>+</sup> |
| 608.3867 |          |           | 1 | 277992.91 |                                                                |                    |
| 613.3428 |          |           | 1 | 823280.13 |                                                                |                    |
| 657.3688 |          |           | 1 | 603302    |                                                                |                    |
| 701.395  |          |           | 1 | 359565.44 |                                                                |                    |

MSMS Spectrum

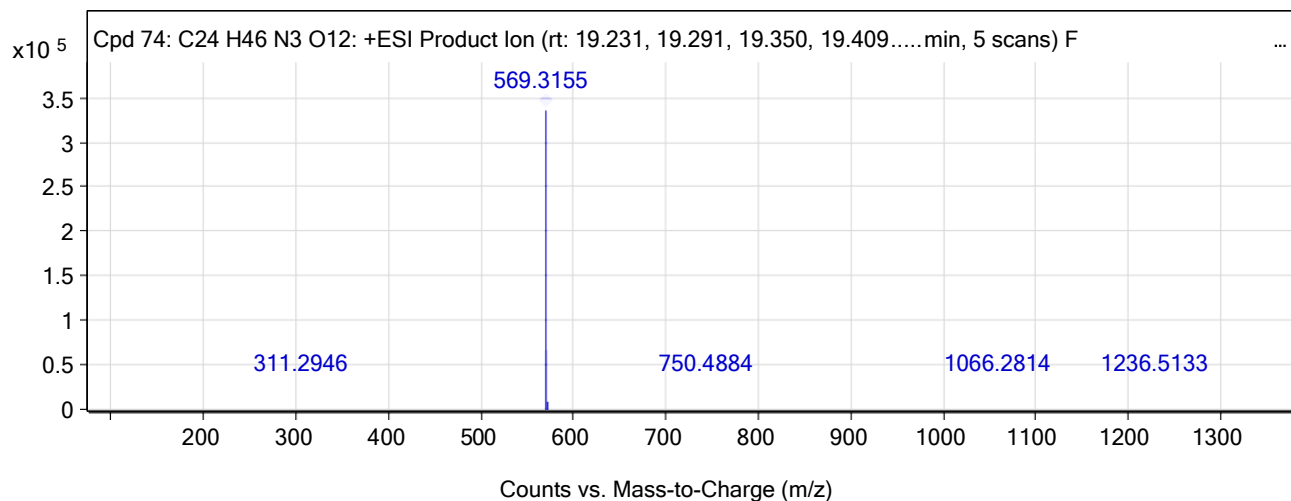

**MS/MS Spectrum Peak List**

| m/z      | Calc m/z | Diff(ppm)  | z | Abund    |
|----------|----------|------------|---|----------|
| 151.0963 | 151.0951 | -7.8       |   | 23.34    |
| 195.1222 | 195.1214 | -4.23      |   | 27.97    |
| 254.1423 | 254.1387 | -14.23     |   | 14.03    |
| 262.1958 | 262.1927 | -11.53     |   | 24.17    |
| 283.2633 | 283.2632 | -0.41      |   | 18       |
| 309.2783 | 309.2788 | 1.78       |   | 30.83    |
| 311.2946 | 311.2945 | -0.5       |   | 61.25    |
| 566.2857 | 283.1457 | -499994.95 | 2 | 43.04    |
| 569.3155 | 569.3154 | -0.14      | 1 | 335627   |
| 570.318  |          |            | 1 | 66946.32 |

| Compound Label      | m/z     | RT     | Algorithm  | Mass     |
|---------------------|---------|--------|------------|----------|
| Cpd 75: C28 H52 O14 | 613.343 | 19.544 | Auto MS/MS | 612.3355 |

**Compound Chromatograms**

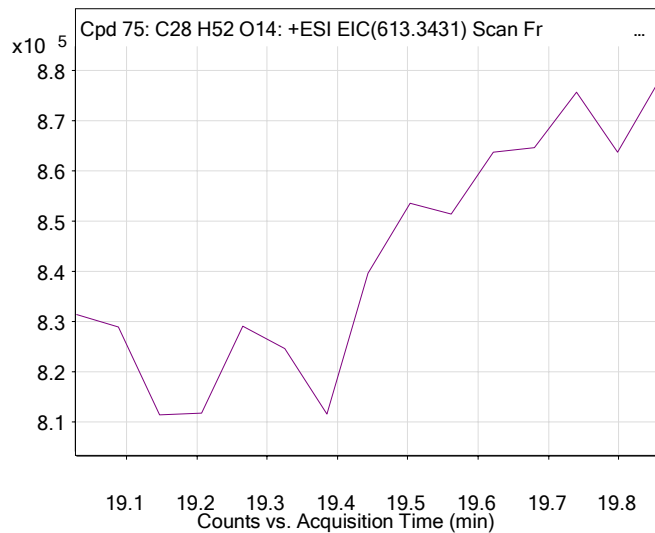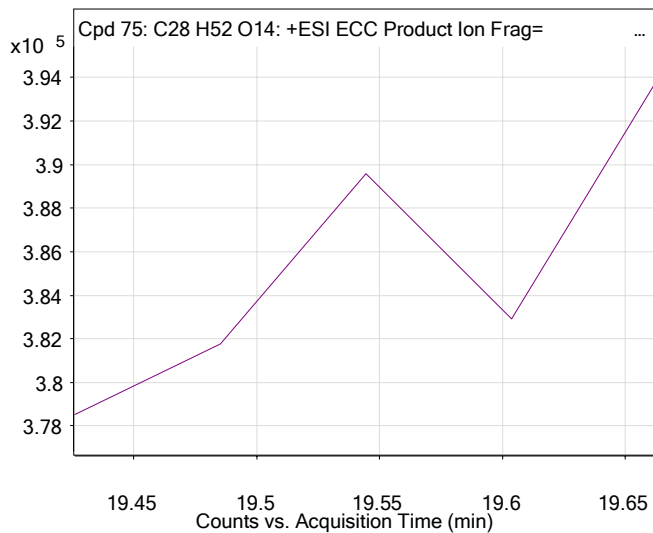

**MS Spectrum**

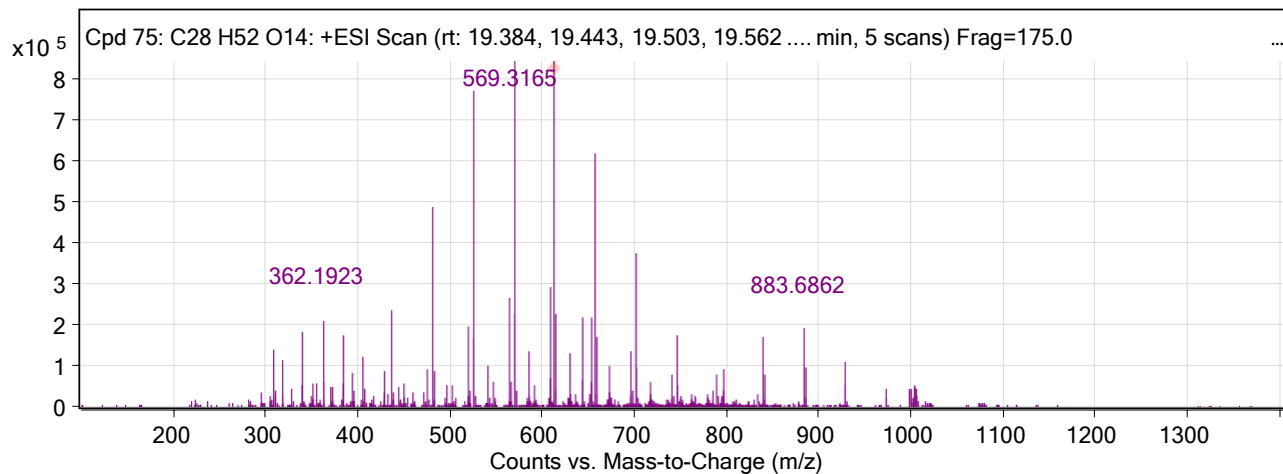

**MS Zoomed Spectrum**



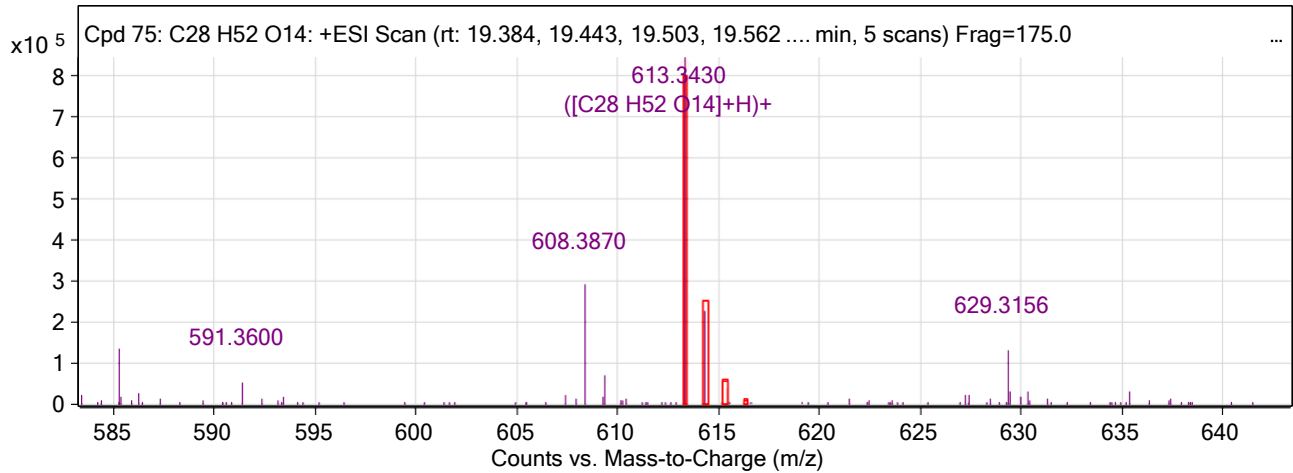

**MS Spectrum Peak List**

| m/z      | Calc m/z | Diff(ppm) | z | Abund     | Formula     | Ion    |
|----------|----------|-----------|---|-----------|-------------|--------|
| 481.2633 |          |           | 1 | 486582.91 |             |        |
| 525.2902 |          |           | 1 | 771782.38 |             |        |
| 569.3165 |          |           | 1 | 944226    |             |        |
| 608.387  |          |           | 1 | 289551.69 |             |        |
| 613.343  | 613.343  | 0.05      | 1 | 843929.81 | C28 H52 O14 | (M+H)+ |
| 614.3455 | 614.3464 | 1.4       | 1 | 228473.59 | C28 H52 O14 | (M+H)+ |
| 615.3475 | 615.3489 | 2.19      | 1 | 41469.36  | C28 H52 O14 | (M+H)+ |
| 616.349  | 616.3515 | -5.52     | 1 | 5574.86   | C28 H52 O14 | (M+H)+ |
| 657.369  |          |           | 1 | 620132.19 |             |        |
| 701.3952 |          |           | 1 | 372892.25 |             |        |

**MS/MS Spectrum**

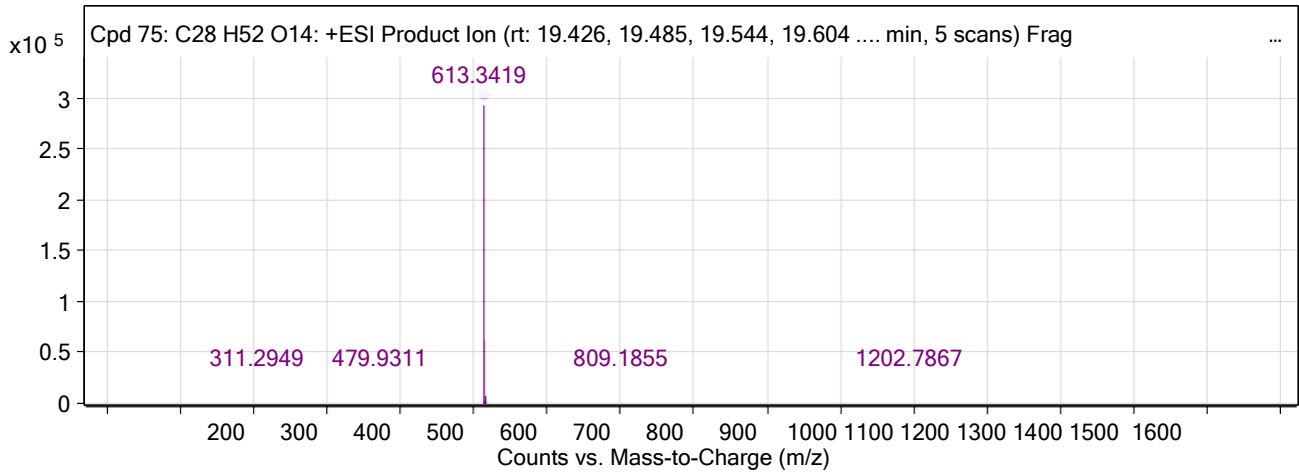

**MS/MS Spectrum Peak List**

| m/z      | Calc m/z | Diff(ppm) | z | Abund     |
|----------|----------|-----------|---|-----------|
| 133.0863 | 133.0859 | -3.02     |   | 53.48     |
| 309.2781 | 309.2788 | 2.21      | 1 | 54.37     |
| 612.3881 |          |           | 2 | 2459.06   |
| 612.6386 |          |           |   | 3053.22   |
| 612.8893 |          |           | 2 | 2529.44   |
| 613.1408 |          |           | 1 | 1383.53   |
| 613.3419 | 613.343  | 1.77      | 1 | 292887.53 |
| 614.3445 |          |           | 1 | 61240.73  |
| 615.3469 |          |           | 1 | 7404.53   |
| 615.4246 |          |           | 2 | 1123.99   |

| Compound Label         | m/z      | RT     | Algorithm  | Mass     |
|------------------------|----------|--------|------------|----------|
| Cpd 76: C24 H46 N3 O12 | 569.3166 | 19.646 | Auto MS/MS | 568.3092 |

**Compound Chromatograms**

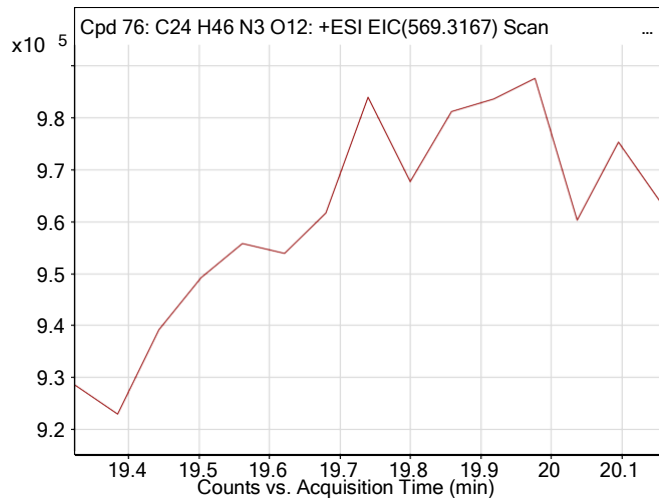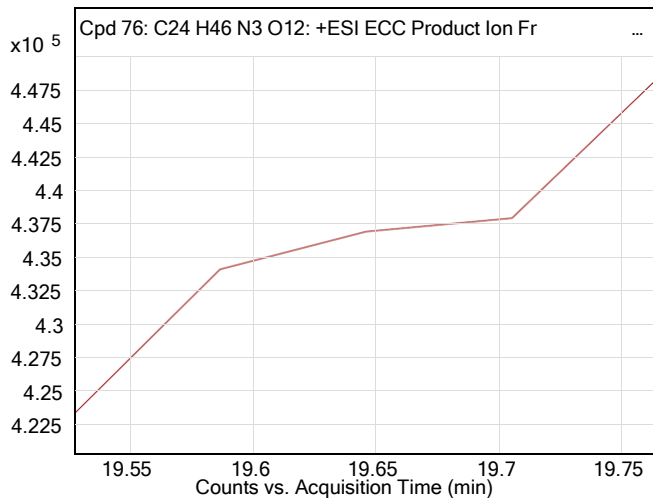

MS Spectrum

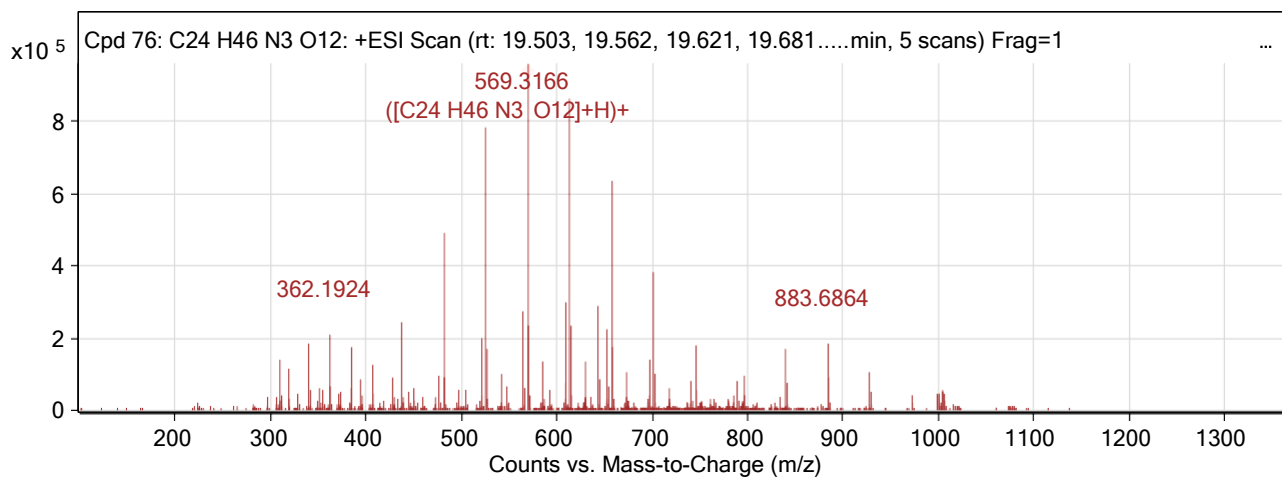

MS Zoomed Spectrum

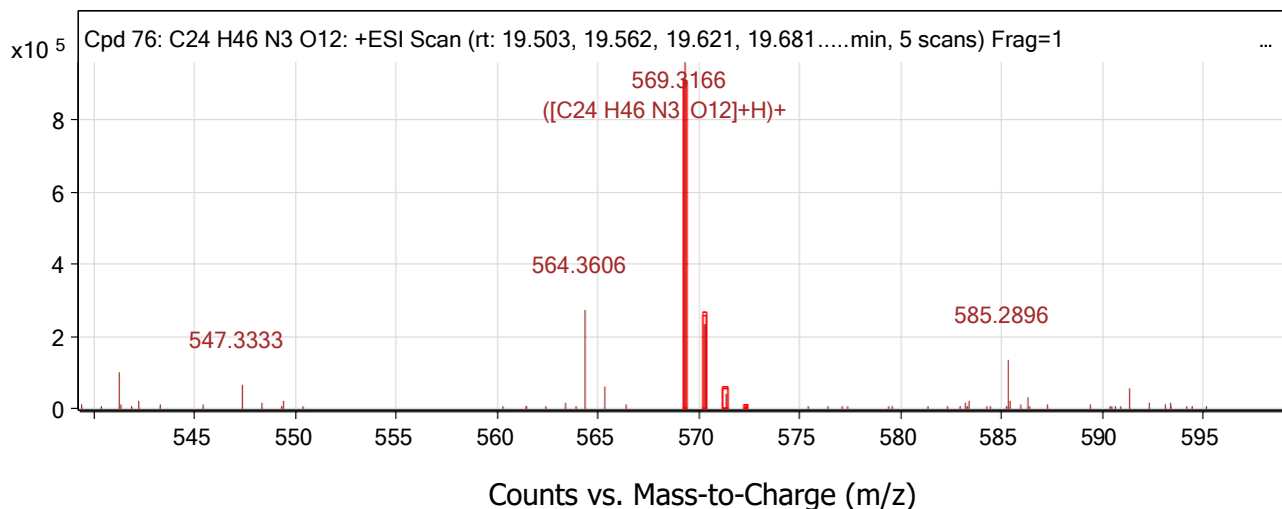

MS Spectrum Peak List

| m/z      | Calc m/z | Diff(ppm) | z | Abund     | Formula                                                        | Ion                |
|----------|----------|-----------|---|-----------|----------------------------------------------------------------|--------------------|
| 481.2634 |          |           | 1 | 490302.56 |                                                                |                    |
| 525.2903 |          |           | 1 | 782116.38 |                                                                |                    |
| 569.3166 | 569.3154 | -2.02     | 1 | 960951.88 | C <sub>24</sub> H <sub>46</sub> N <sub>3</sub> O <sub>12</sub> | (M+H) <sup>+</sup> |
| 570.3193 | 570.3186 | -1.16     | 1 | 231245.83 | C <sub>24</sub> H <sub>46</sub> N <sub>3</sub> O <sub>12</sub> | (M+H) <sup>+</sup> |
| 571.3214 | 571.3209 | -0.73     | 1 | 38435.08  | C <sub>24</sub> H <sub>46</sub> N <sub>3</sub> O <sub>12</sub> | (M+H) <sup>+</sup> |
| 572.3244 | 572.3235 | -1.51     | 1 | 5164.91   | C <sub>24</sub> H <sub>46</sub> N <sub>3</sub> O <sub>12</sub> | (M+H) <sup>+</sup> |
| 608.3871 |          |           | 1 | 297885.19 |                                                                |                    |
| 613.3431 |          |           | 1 | 861766.88 |                                                                |                    |
| 657.3691 |          |           | 1 | 635402.88 |                                                                |                    |

MSMS Spectrum

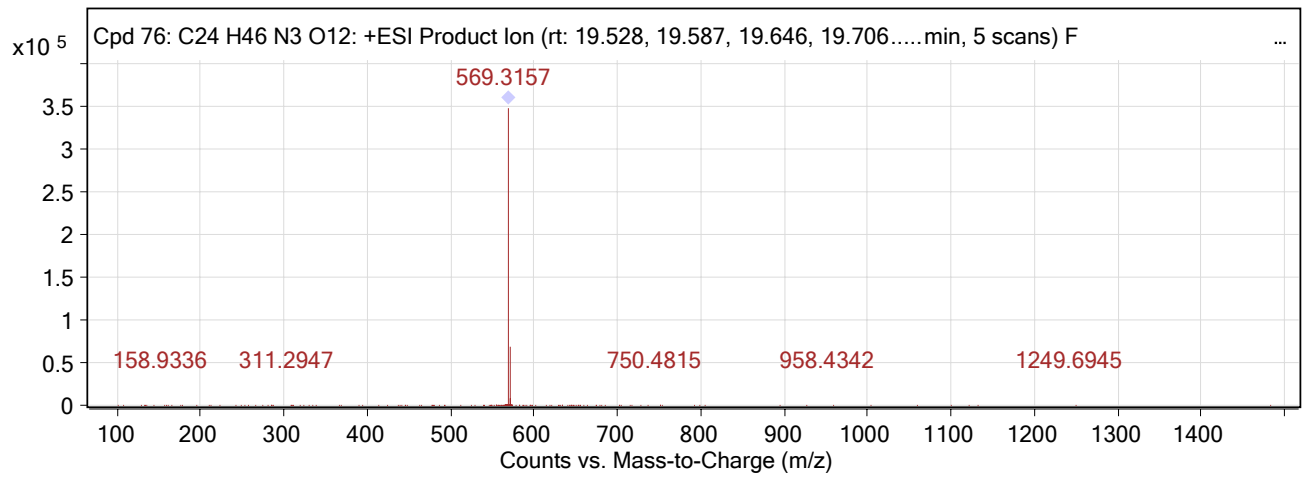

MS/MS Spectrum Peak List

| m/z      | Calc m/z | Diff(ppm) | z | Abund     |
|----------|----------|-----------|---|-----------|
| 133.0867 | 133.0859 | -5.49     |   | 49.59     |
| 177.1112 | 177.1108 | -2.08     |   | 18.38     |
| 195.1219 | 195.1214 | -2.68     |   | 30.79     |
| 241.136  | 241.1394 | 13.97     |   | 13.8      |
| 274.2152 | 274.2139 | -4.82     |   | 15.99     |
| 284.2664 | 284.2696 | 11.48     |   | 15.2      |
| 309.2761 | 309.2775 | 4.45      |   | 14.02     |
| 311.2947 | 311.2945 | -0.9      |   | 62.71     |
| 329.2271 | 329.2309 | 11.63     |   | 28.66     |
| 569.3157 | 569.3154 | -0.53     | 1 | 348678.03 |

| Compound Label      | m/z      | RT     | Algorithm  | Mass     |
|---------------------|----------|--------|------------|----------|
| Cpd 77: C28 H52 O14 | 613.3429 | 19.841 | Auto MS/MS | 612.3355 |

Compound Chromatograms

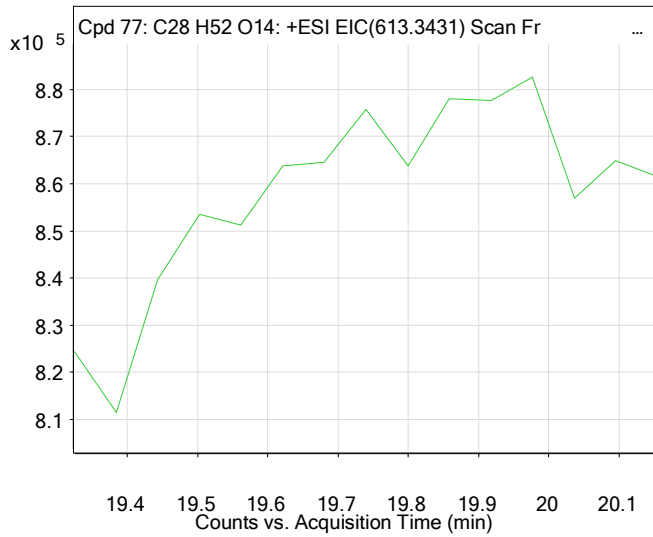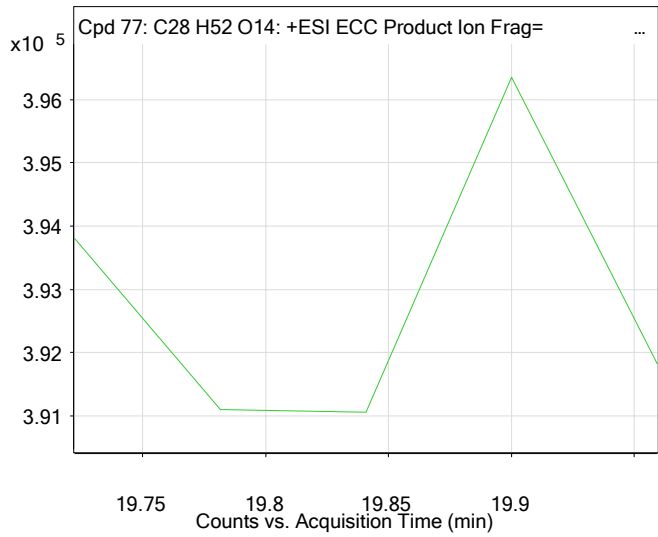

MS Spectrum

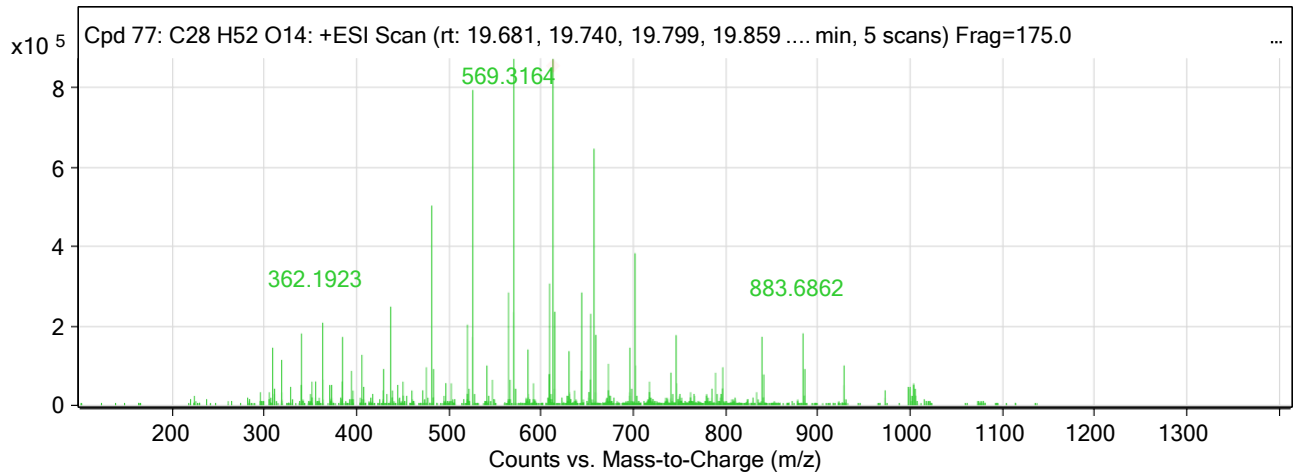

MS Zoomed Spectrum

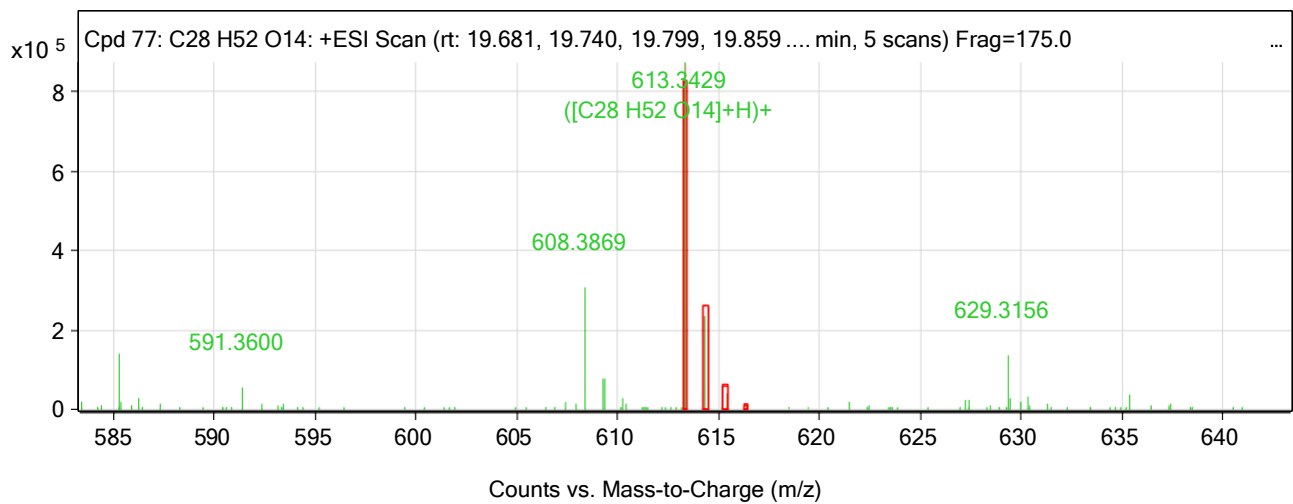

MS Spectrum Peak List

| m/z      | Calc m/z | Diff(ppm) | z | Abund     | Formula                                         | Ion                |
|----------|----------|-----------|---|-----------|-------------------------------------------------|--------------------|
| 481.2633 |          |           | 1 | 498434.34 |                                                 |                    |
| 525.2902 |          |           | 1 | 792185.38 |                                                 |                    |
| 569.3164 |          |           | 1 | 975695.81 |                                                 |                    |
| 608.3869 |          |           | 1 | 306253.81 |                                                 |                    |
| 613.3429 | 613.343  | 0.06      | 1 | 871966.63 | C <sub>28</sub> H <sub>52</sub> O <sub>14</sub> | (M+H) <sup>+</sup> |
| 614.3455 | 614.3464 | 1.42      | 1 | 235697.72 | C <sub>28</sub> H <sub>52</sub> O <sub>14</sub> | (M+H) <sup>+</sup> |
| 615.3474 | 615.3489 | 2.31      | 1 | 42572.23  | C <sub>28</sub> H <sub>52</sub> O <sub>14</sub> | (M+H) <sup>+</sup> |
| 616.3543 | 616.3515 | -4.42     | 1 | 5851.39   | C <sub>28</sub> H <sub>52</sub> O <sub>14</sub> | (M+H) <sup>+</sup> |
| 657.369  |          |           | 1 | 641540.13 |                                                 |                    |
| 701.3953 |          |           | 1 | 382727.38 |                                                 |                    |

MSMS Spectrum

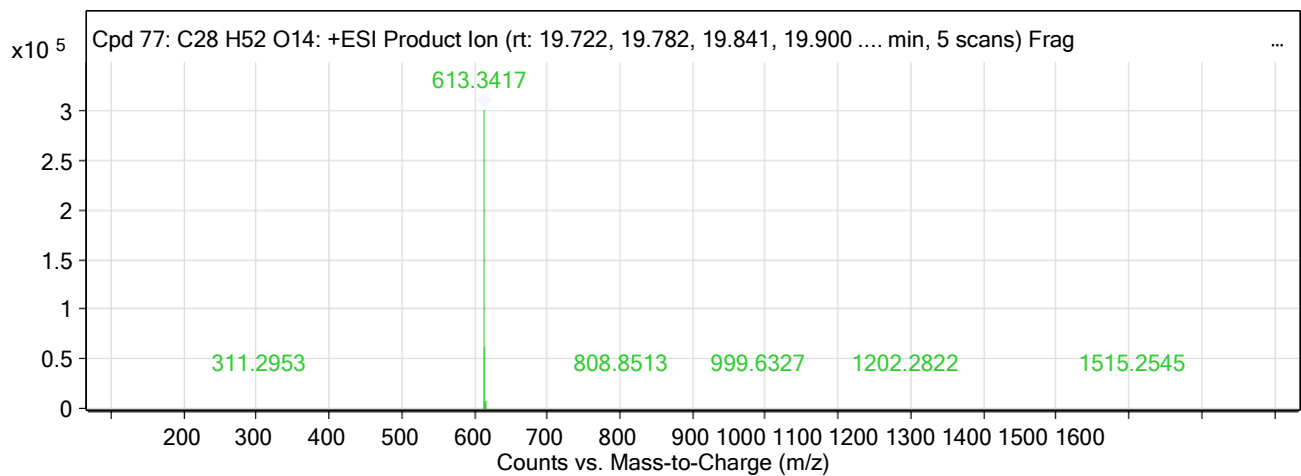

**MS/MS Spectrum Peak List**

| m/z      | Calc m/z | Diff(ppm) | z | Abund     |
|----------|----------|-----------|---|-----------|
| 133.0859 | 133.0859 | 0.28      | 2 | 60.58     |
| 309.2787 | 309.2788 | 0.27      | 2 | 83.32     |
| 311.2953 | 311.2945 | -2.8      | 1 | 88.89     |
| 612.3888 |          |           | 2 | 2205.02   |
| 612.638  |          |           | 2 | 3024.56   |
| 612.889  |          |           | 2 | 2411.54   |
| 613.1418 |          |           | 2 | 1252.13   |
| 613.3417 | 613.343  | 2.07      | 1 | 301169.94 |
| 614.3444 |          |           | 1 | 61472.11  |
| 615.3467 |          |           | 1 | 7617.62   |

| Compound Label         | m/z      | RT     | Algorithm  | Mass     |
|------------------------|----------|--------|------------|----------|
| Cpd 78: C24 H46 N3 O12 | 569.3166 | 19.943 | Auto MS/MS | 568.3092 |

**Compound Chromatograms**

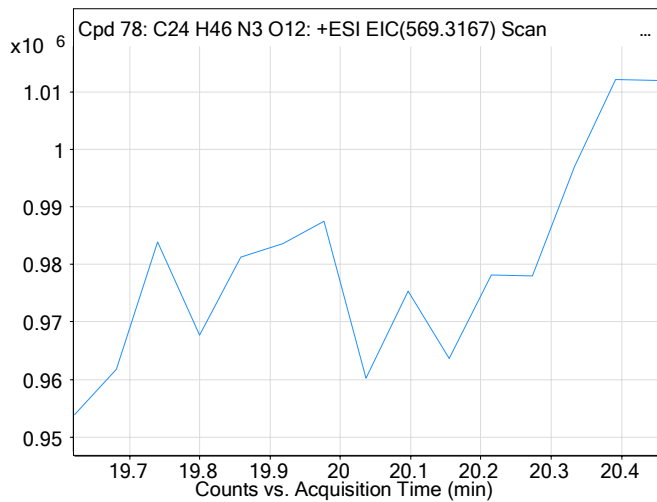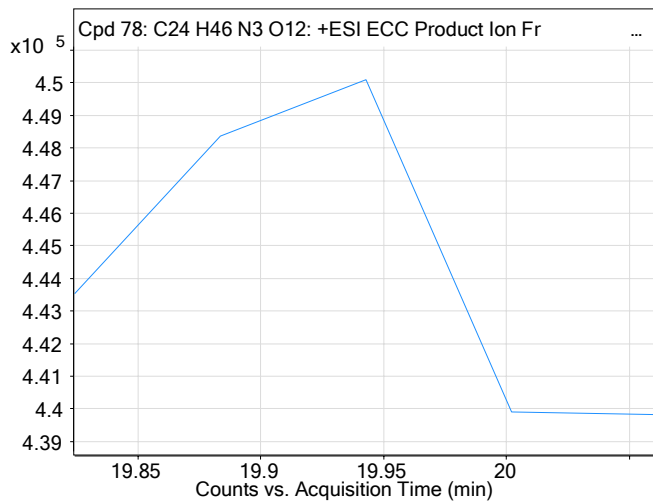

MS Spectrum

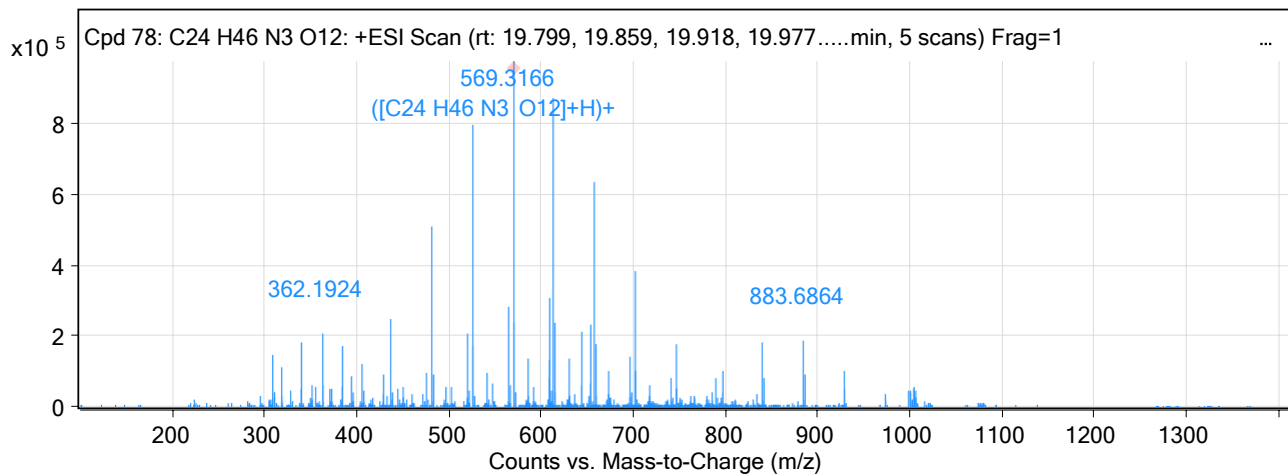

MS Zoomed Spectrum

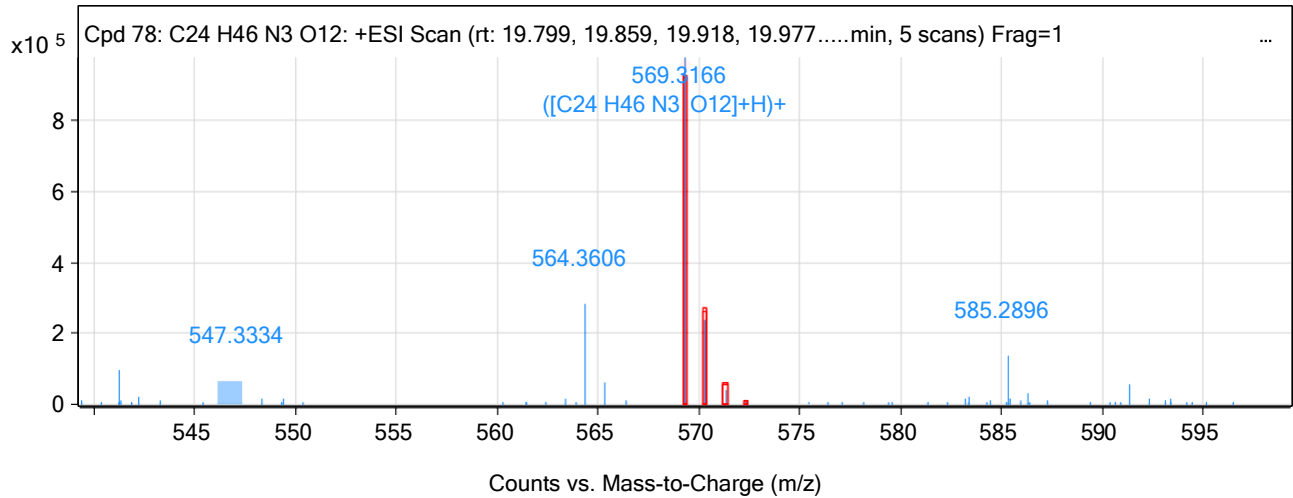

**MS Spectrum Peak List**

| m/z      | Calc m/z | Diff(ppm) | z | Abund     | Formula                                                        | Ion                |
|----------|----------|-----------|---|-----------|----------------------------------------------------------------|--------------------|
| 481.2634 |          |           | 1 | 509704.59 |                                                                |                    |
| 525.2904 |          |           | 1 | 797159.13 |                                                                |                    |
| 569.3166 | 569.3154 | -2.06     | 1 | 976116.31 | C <sub>24</sub> H <sub>46</sub> N <sub>3</sub> O <sub>12</sub> | (M+H) <sup>+</sup> |
| 570.3194 | 570.3186 | -1.31     | 1 | 234469    | C <sub>24</sub> H <sub>46</sub> N <sub>3</sub> O <sub>12</sub> | (M+H) <sup>+</sup> |
| 571.3214 | 571.3209 | -0.72     | 1 | 38682.89  | C <sub>24</sub> H <sub>46</sub> N <sub>3</sub> O <sub>12</sub> | (M+H) <sup>+</sup> |
| 572.3245 | 572.3235 | -1.63     | 1 | 5424.57   | C <sub>24</sub> H <sub>46</sub> N <sub>3</sub> O <sub>12</sub> | (M+H) <sup>+</sup> |
| 608.3871 |          |           | 1 | 307247.16 |                                                                |                    |
| 613.3431 |          |           | 1 | 871787.63 |                                                                |                    |
| 657.3692 |          |           | 1 | 635472.63 |                                                                |                    |
| 701.3954 |          |           | 1 | 383051.31 |                                                                |                    |

MSMS Spectrum

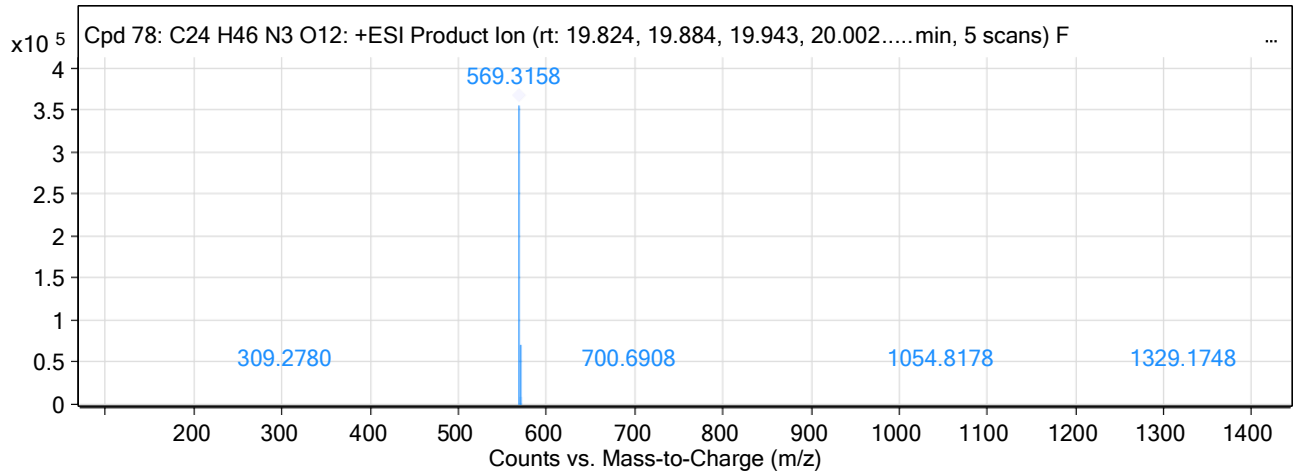

**MS/MS Spectrum PeakList**

| m/z      | Calc m/z | Diff(ppm) | z | Abund     |
|----------|----------|-----------|---|-----------|
| 107.0707 | 107.0689 | -16.11    |   | 21.74     |
| 133.0856 | 133.0859 | 2.61      |   | 32.49     |
| 151.0977 | 151.0992 | 9.98      |   | 21.91     |
| 195.123  | 195.1214 | -8.27     |   | 16.01     |
| 283.2639 | 283.2632 | -2.72     |   | 17.65     |
| 285.2066 | 285.206  | -1.86     |   | 35.76     |
| 309.278  | 309.2775 | -1.72     |   | 47.54     |
| 374.2319 | 374.2299 | -5.34     |   | 14.46     |
| 459.3021 | 459.3065 | 9.61      |   | 16.83     |
| 569.3158 | 569.3154 | -0.68     | 1 | 354972.22 |

| Compound Label                                          | m/z      | RT     | Algorithm  | Mass     |
|---------------------------------------------------------|----------|--------|------------|----------|
| Cpd 79: C <sub>28</sub> H <sub>52</sub> O <sub>14</sub> | 613.3433 | 20.137 | Auto MS/MS | 612.3358 |

Compound Chromatograms

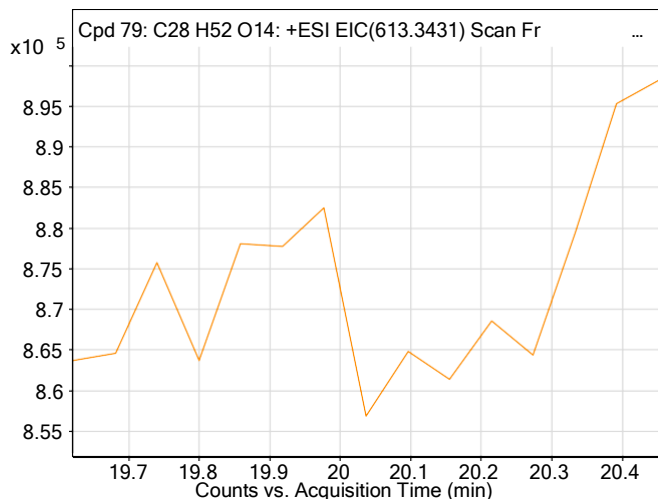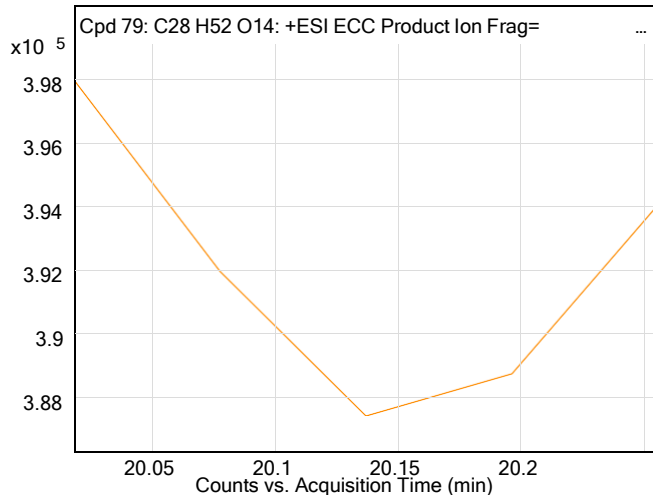

MS Spectrum

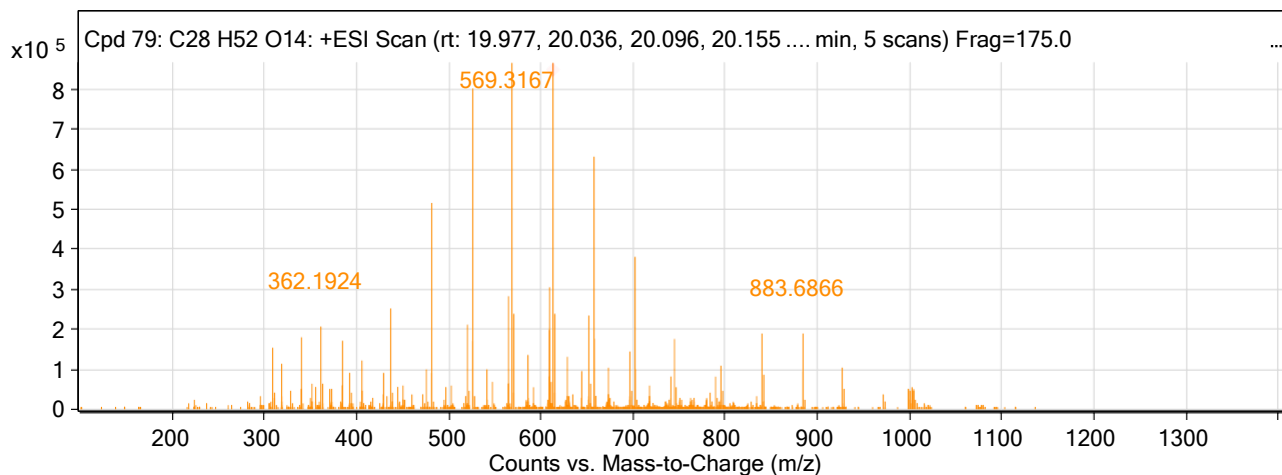

MS Zoomed Spectrum

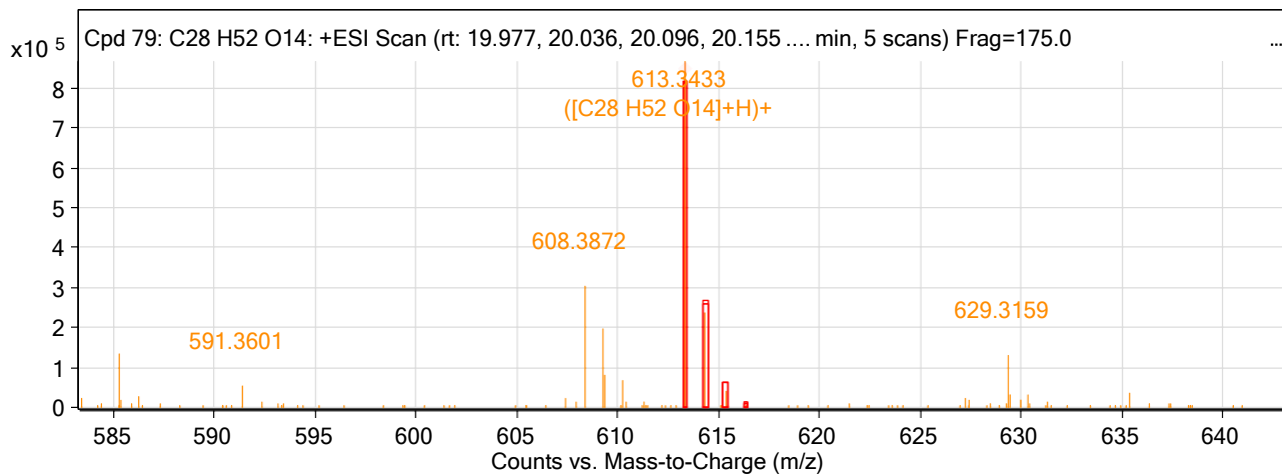

MS Spectrum Peak List

| m/z      | Calc m/z | Diff(ppm) | z | Abund     | Formula     | Ion    |
|----------|----------|-----------|---|-----------|-------------|--------|
| 481.2635 |          |           | 1 | 513905.94 |             |        |
| 525.2905 |          |           | 1 | 800544.13 |             |        |
| 569.3167 |          |           | 1 | 973019.69 |             |        |
| 608.3872 |          |           | 1 | 306251.97 |             |        |
| 613.3433 | 613.343  | -0.47     | 1 | 866863.5  | C28 H52 O14 | (M+H)+ |
| 614.3459 | 614.3464 | 0.86      | 1 | 236219.7  | C28 H52 O14 | (M+H)+ |
| 615.3478 | 615.3489 | 1.7       | 1 | 42276.55  | C28 H52 O14 | (M+H)+ |
| 616.3549 | 616.3515 | -5.5      | 1 | 5742.26   | C28 H52 O14 | (M+H)+ |
| 657.3693 |          |           | 1 | 631557.38 |             |        |

MSMS Spectrum

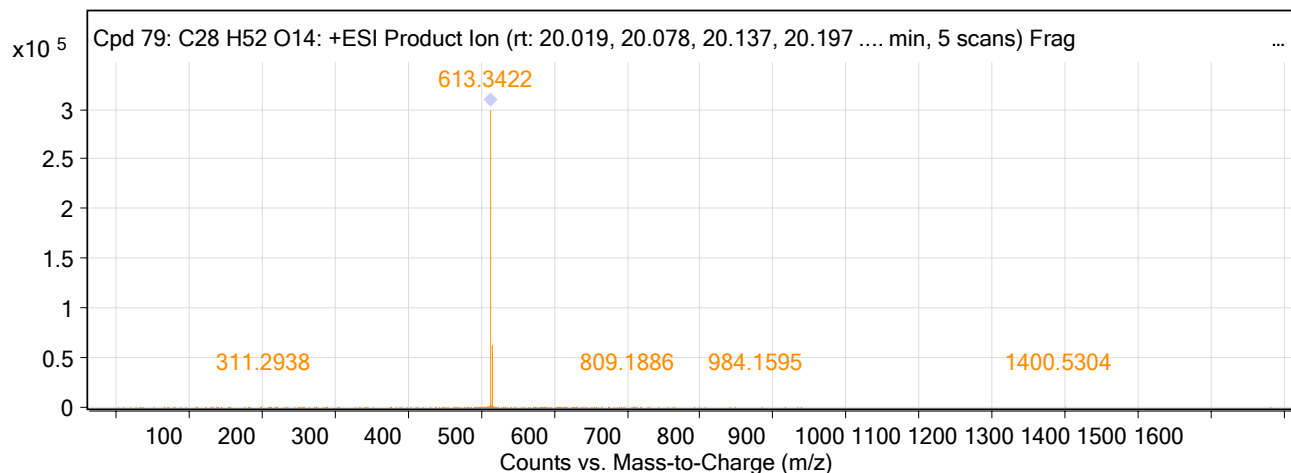

MS/MS Spectrum Peak List

| m/z      | Calc m/z | Diff(ppm) | z | Abund     |
|----------|----------|-----------|---|-----------|
| 133.0861 | 133.0859 | -1.71     |   | 45.44     |
| 309.2785 | 309.2788 | 0.99      | 1 | 82.46     |
| 357.0658 | 357.0664 | 1.62      |   | 48.27     |
| 610.3133 | 610.3195 | 10.15     | 1 | 40.56     |
| 612.3883 |          |           | 2 | 2292.89   |
| 612.6382 |          |           |   | 2747.36   |
| 612.8896 |          |           | 2 | 2450.2    |
| 613.3422 | 613.343  | 1.36      | 1 | 299439.34 |
| 614.3448 |          |           | 1 | 62780.96  |
| 615.3472 |          |           | 1 | 7390.79   |

| Compound Label                                          | m/z      | RT     | Algorithm  | Mass     |
|---------------------------------------------------------|----------|--------|------------|----------|
| Cpd 80: C <sub>26</sub> H <sub>48</sub> O <sub>13</sub> | 569.3166 | 20.239 | Auto MS/MS | 568.3092 |

Compound Chromatograms

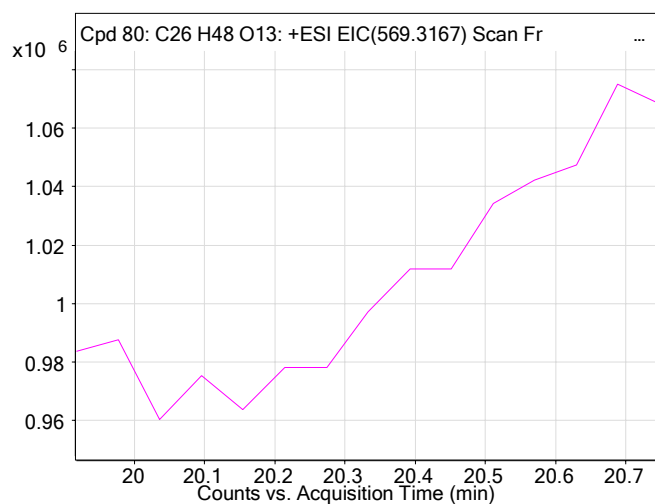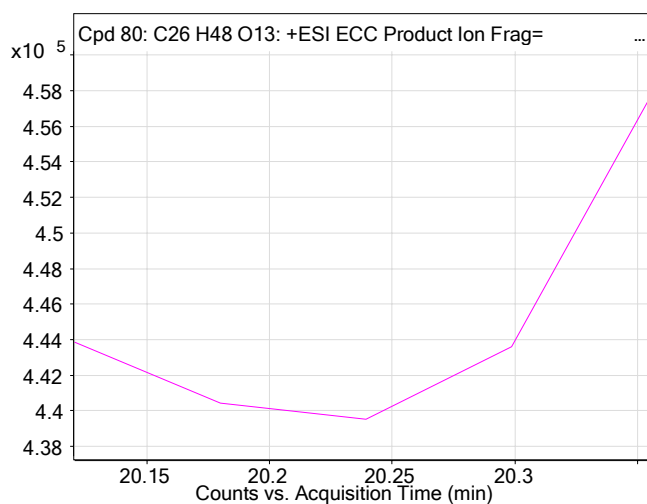

MS Spectrum



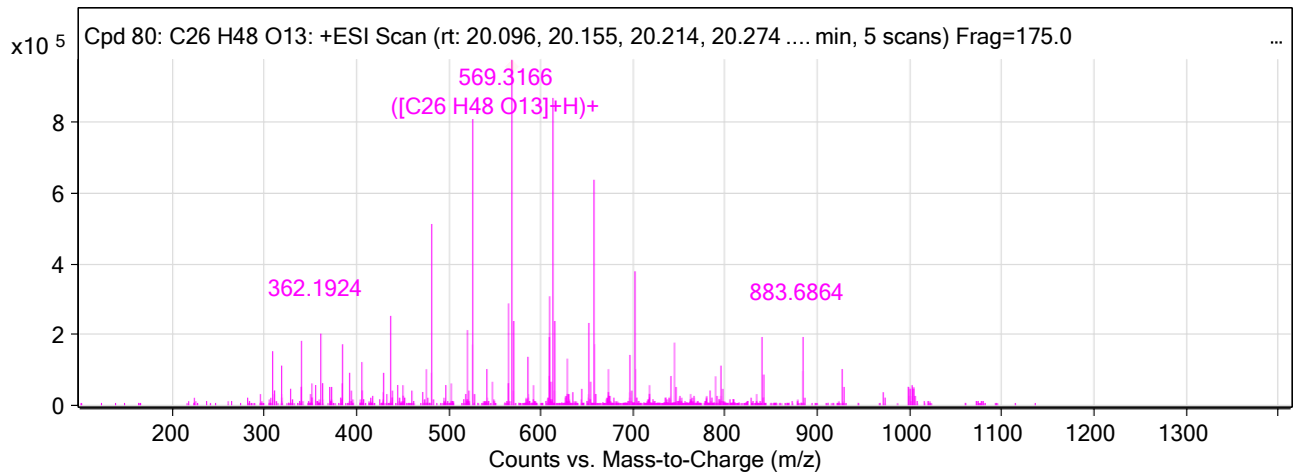

MS Zoomed Spectrum

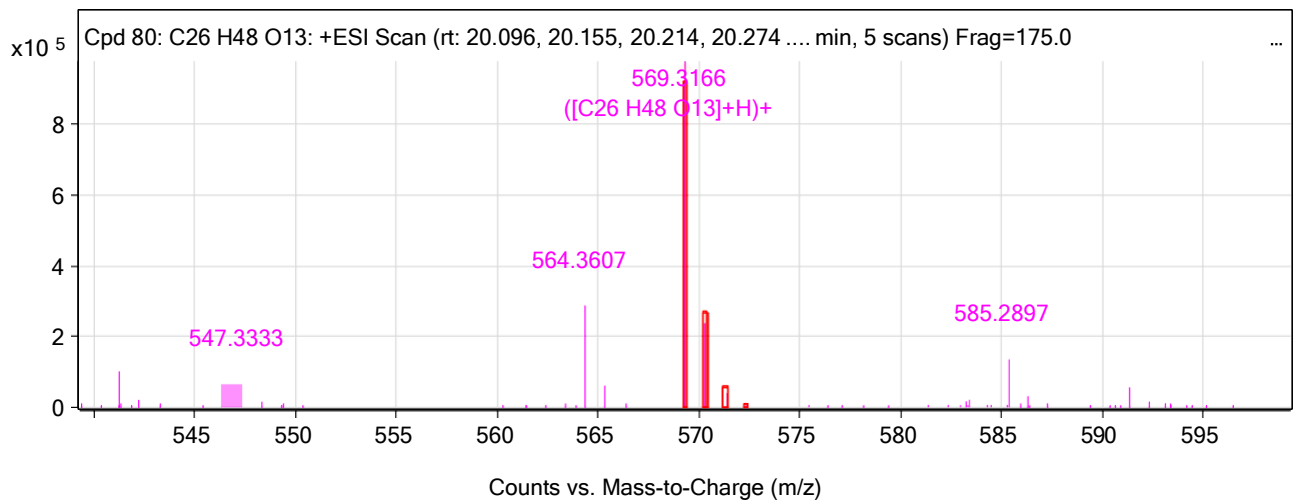

MS Spectrum Peak List

| m/z      | Calc m/z | Diff(ppm) | z | Abund     | Formula                                         | Ion    |
|----------|----------|-----------|---|-----------|-------------------------------------------------|--------|
| 481.2635 |          |           | 1 | 510358.81 |                                                 |        |
| 525.2904 |          |           | 1 | 805427.81 |                                                 |        |
| 569.3166 | 569.3168 | 0.25      | 1 | 978470.13 | C <sub>26</sub> H <sub>48</sub> O <sub>13</sub> | (M+H)+ |
| 570.3193 | 570.3202 | 1.49      | 1 | 236060.72 | C <sub>26</sub> H <sub>48</sub> O <sub>13</sub> | (M+H)+ |
| 571.3214 | 571.3226 | 2.1       | 1 | 38583.9   | C <sub>26</sub> H <sub>48</sub> O <sub>13</sub> | (M+H)+ |
| 572.324  | 572.3253 | 2.33      | 1 | 5249.86   | C <sub>26</sub> H <sub>48</sub> O <sub>13</sub> | (M+H)+ |
| 608.3871 |          |           | 1 | 307935.81 |                                                 |        |
| 613.3432 |          |           | 1 | 867755    |                                                 |        |
| 657.3692 |          |           | 1 | 636366.69 |                                                 |        |
| 701.3953 |          |           | 1 | 378011.25 |                                                 |        |

MSMS Spectrum

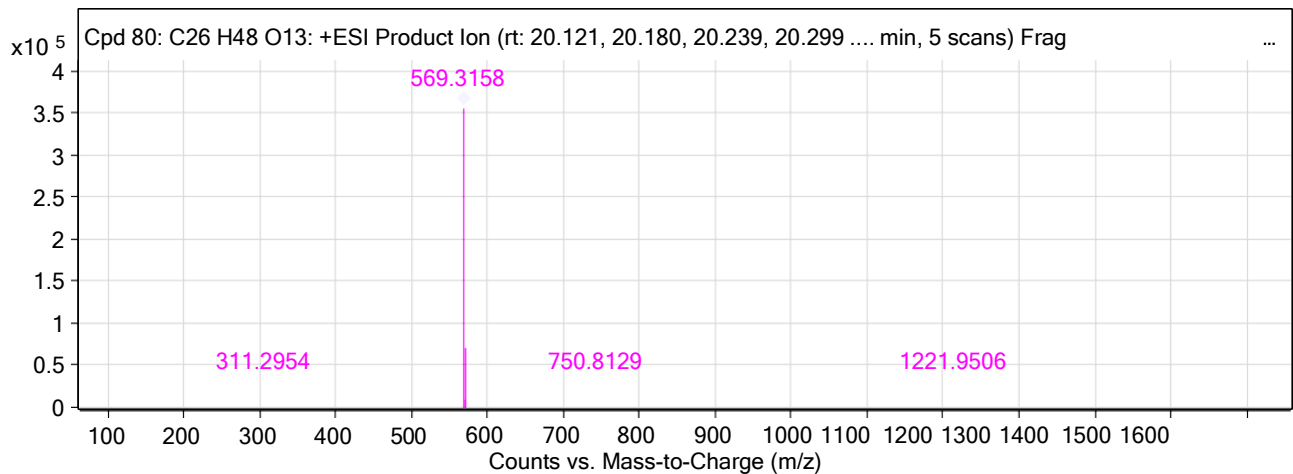

**MS/MS Spectrum Peak List**

| m/z      | Calc m/z | Diff(ppm) | z | Abund     |
|----------|----------|-----------|---|-----------|
| 117.0908 | 117.091  | 1.9       |   | 13.8      |
| 133.0865 | 133.0859 | -4.49     |   | 25.18     |
| 165.0856 | 165.091  | 32.55     |   | 12.52     |
| 177.1127 | 177.1121 | -3.25     |   | 35.51     |
| 221.1397 | 221.1384 | -6.02     |   | 21.23     |
| 309.2799 | 309.2788 | -3.49     |   | 30.91     |
| 311.2954 | 311.2945 | -2.92     | 1 | 59.34     |
| 318.2403 | 318.2401 | -0.78     |   | 14.44     |
| 569.3158 | 569.3168 | 1.69      | 1 | 354797.84 |
| 570.3183 |          |           | 1 | 70302.67  |

| Compound Label      | m/z      | RT     | Algorithm  | Mass     |
|---------------------|----------|--------|------------|----------|
| Cpd 81: C28 H52 O14 | 613.3431 | 20.434 | Auto MS/MS | 612.3356 |

**Compound Chromatograms**

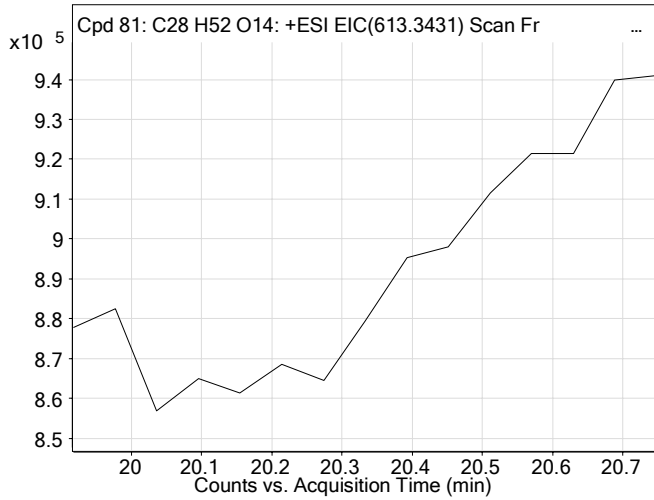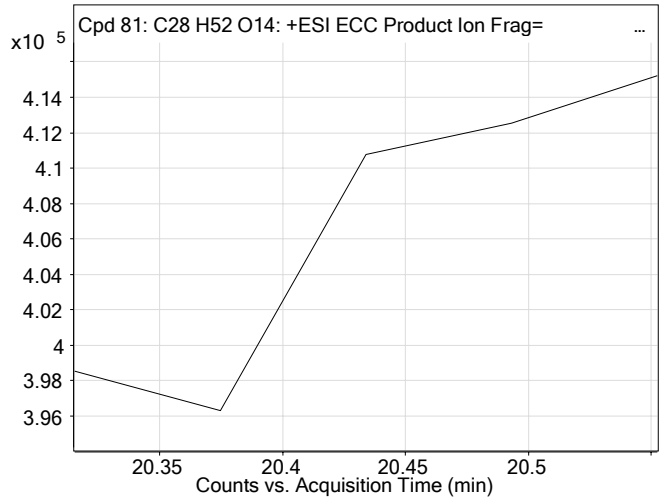

MS Spectrum

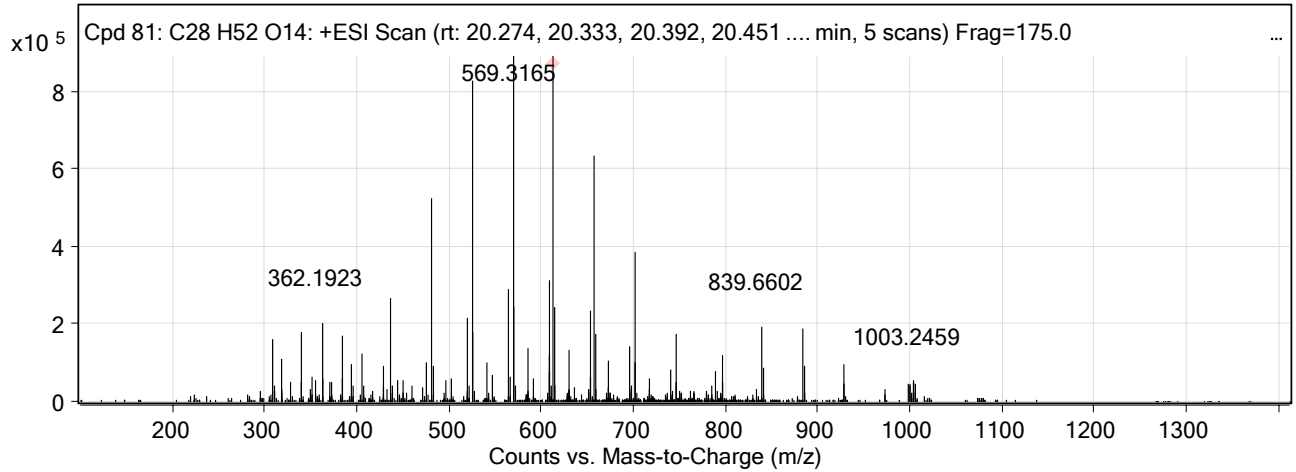

MS Zoomed Spectrum

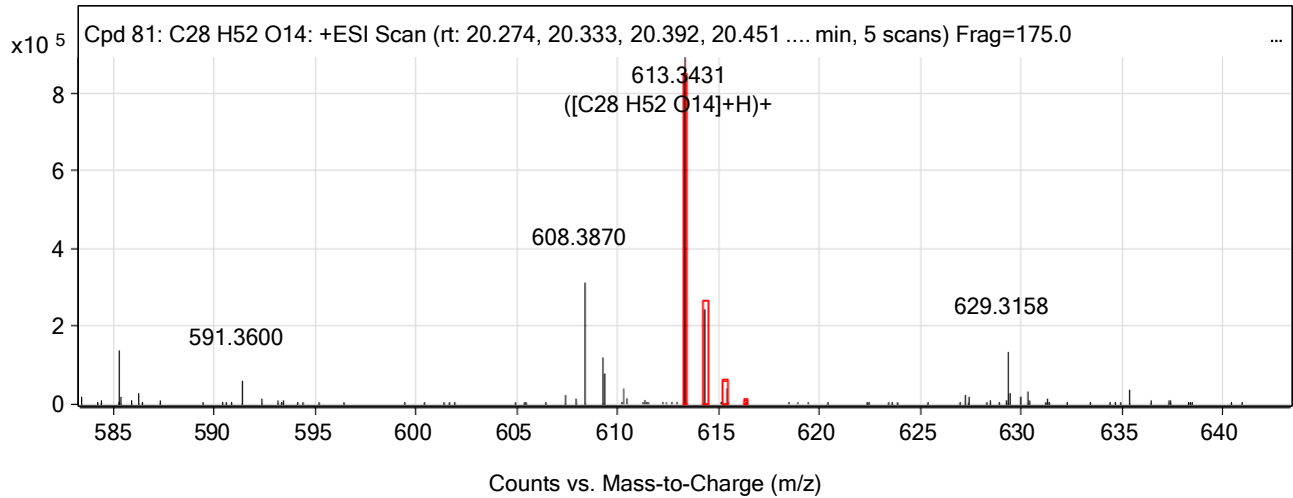

**MS Spectrum Peak List**

| m/z      | Calc m/z | Diff(ppm) | z | Abund     | Formula     | Ion    |
|----------|----------|-----------|---|-----------|-------------|--------|
| 481.2634 |          |           | 1 | 522086.69 |             |        |
| 525.2903 |          |           | 1 | 827616.75 |             |        |
| 569.3165 |          |           | 1 | 1006700   |             |        |
| 608.387  |          |           | 1 | 311904.03 |             |        |
| 613.3431 | 613.343  | -0.15     | 1 | 889775.63 | C28 H52 O14 | (M+H)+ |
| 614.3457 | 614.3464 | 1.19      | 1 | 243484.47 | C28 H52 O14 | (M+H)+ |
| 615.3477 | 615.3489 | 1.93      | 1 | 43194.82  | C28 H52 O14 | (M+H)+ |
| 616.354  | 616.3515 | -3.93     | 1 | 6013.37   | C28 H52 O14 | (M+H)+ |
| 657.3692 |          |           | 1 | 631542.38 |             |        |
| 701.3952 |          |           | 1 | 383540.03 |             |        |

MSMS Spectrum

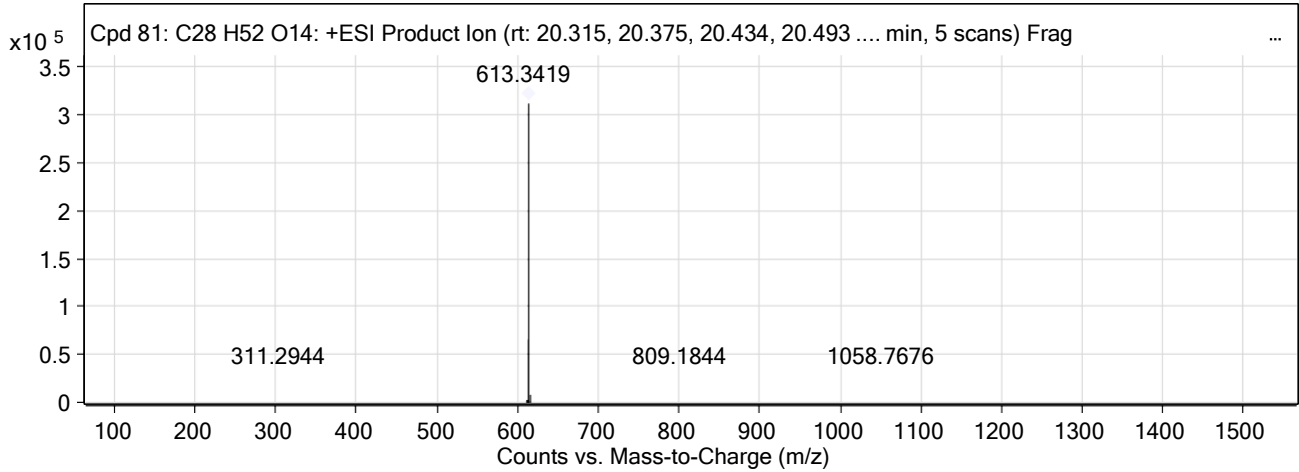

**MS/MS Spectrum Peak List**

| m/z      | Calc m/z | Diff(ppm) | z | Abund     |
|----------|----------|-----------|---|-----------|
| 133.0863 | 133.0859 | -2.89     |   | 24.13     |
| 296.1515 | 296.1466 | -16.66    |   | 29.67     |
| 309.2776 | 309.2788 | 4.06      | 1 | 64.43     |
| 612.3887 |          |           | 2 | 2133.87   |
| 612.638  |          |           | 2 | 2731.26   |
| 612.8892 |          |           | 2 | 2030.21   |
| 613.1402 |          |           | 2 | 1287.45   |
| 613.3419 | 613.343  | 1.7       | 1 | 311985.41 |
| 614.3446 |          |           | 1 | 64535.2   |
| 615.3467 |          |           | 1 | 7810.14   |

| Compound Label         | m/z      | RT     | Algorithm  | Mass     |
|------------------------|----------|--------|------------|----------|
| Cpd 82: C24 H46 N3 O12 | 569.3165 | 20.536 | Auto MS/MS | 568.3091 |

**Compound Chromatograms**

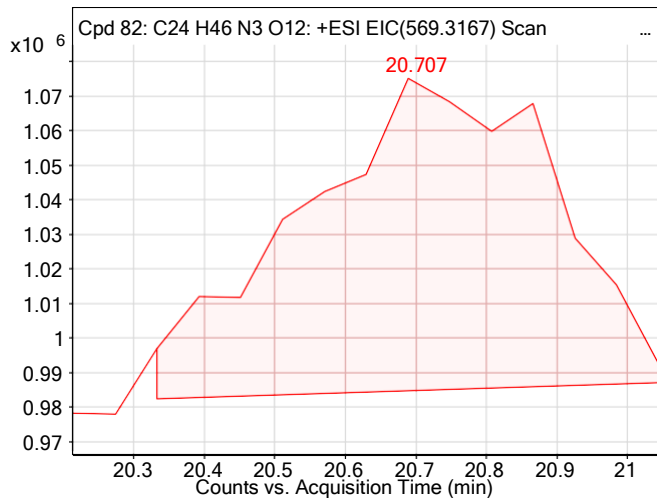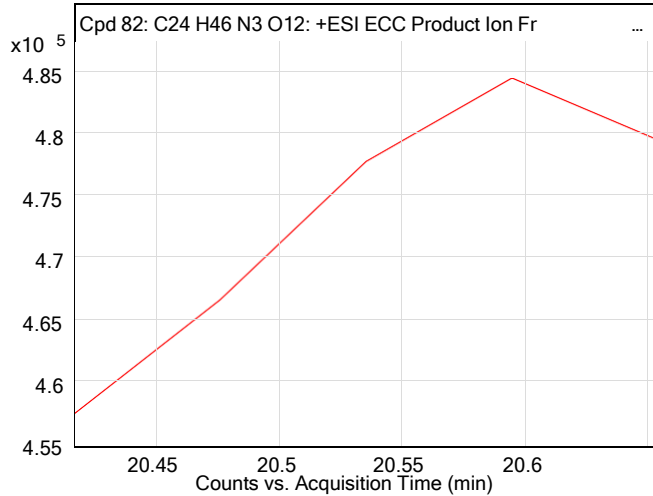

MS Spectrum

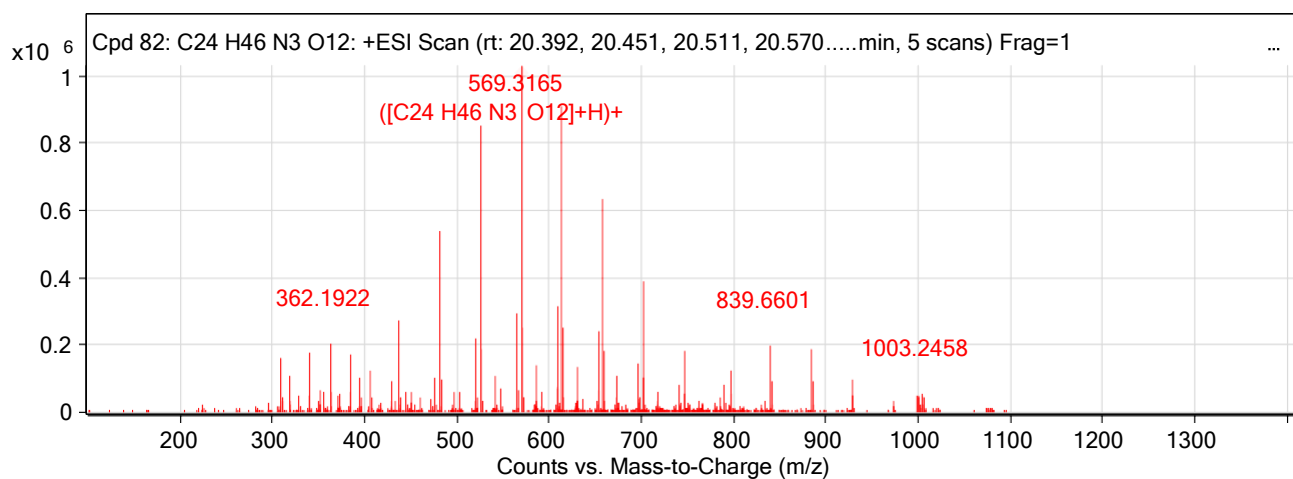

MS Zoomed Spectrum

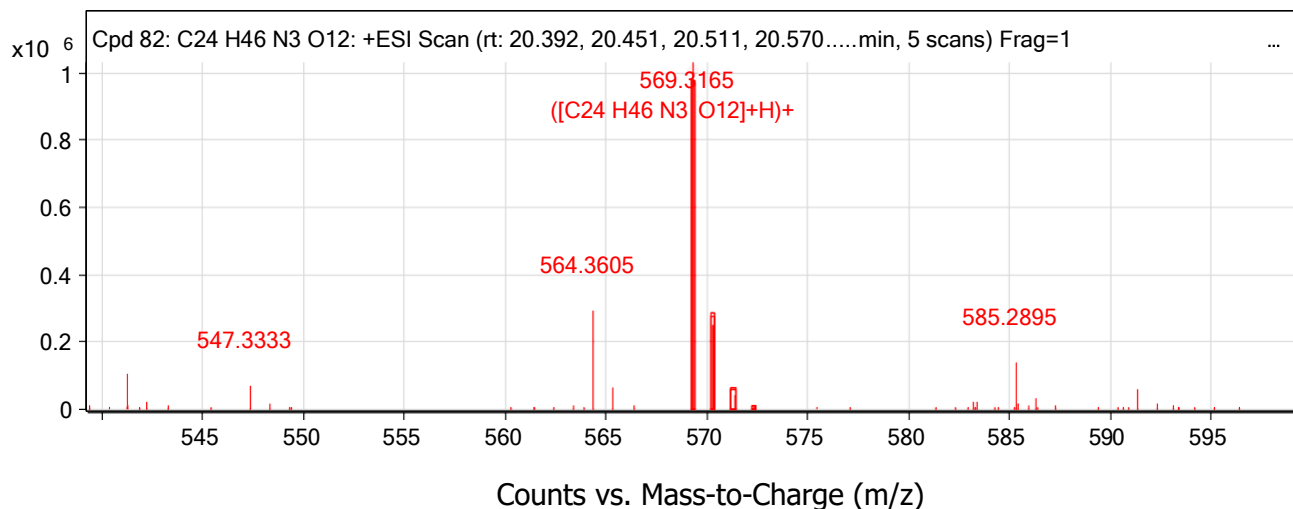

MS Spectrum Peak List

| m/z      | Calc m/z | Diff(ppm) | z | Abund      | Formula        | Ion    |
|----------|----------|-----------|---|------------|----------------|--------|
| 481.2633 |          |           | 1 | 538703.06  |                |        |
| 525.2902 |          |           | 1 | 849161     |                |        |
| 569.3165 | 569.3154 | -1.87     | 1 | 1029638.38 | C24 H46 N3 O12 | (M+H)+ |
| 570.3192 | 570.3186 | -1.01     | 1 | 248469.63  | C24 H46 N3 O12 | (M+H)+ |
| 571.3212 | 571.3209 | -0.47     | 1 | 40797.7    | C24 H46 N3 O12 | (M+H)+ |
| 572.324  | 572.3235 | -0.9      | 1 | 5532.4     | C24 H46 N3 O12 | (M+H)+ |
| 608.387  |          |           | 1 | 314592.16  |                |        |
| 613.343  |          |           | 1 | 909564     |                |        |
| 657.3691 |          |           | 1 | 633909.88  |                |        |

MSMS Spectrum

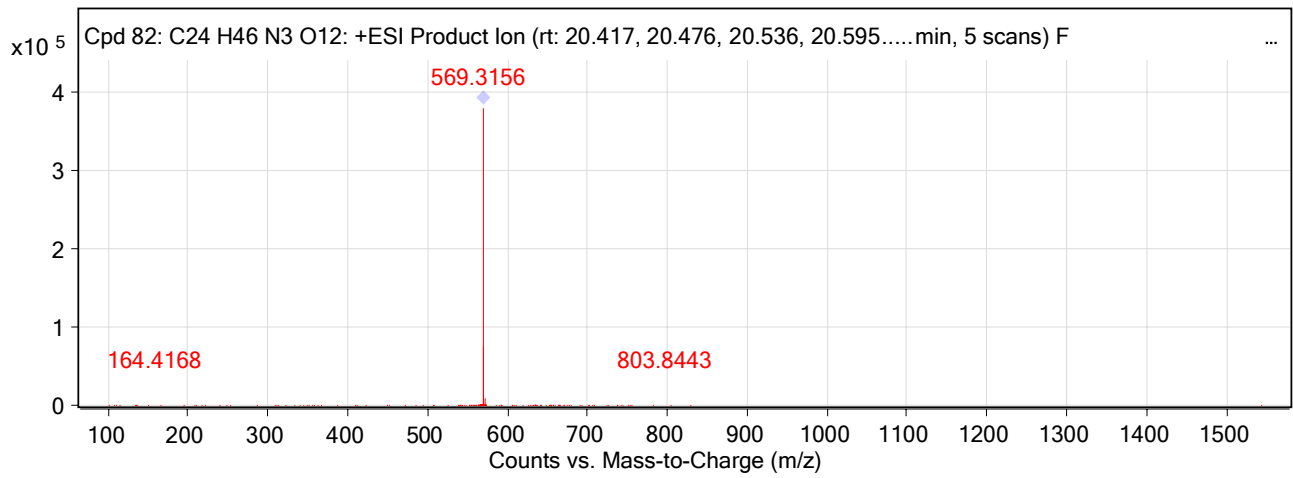

MS/MS Spectrum Peak List

| m/z      | Calc m/z | Diff(ppm) | z | Abund     |
|----------|----------|-----------|---|-----------|
| 133.087  | 133.0859 | -8.36     |   | 36.38     |
| 221.1369 | 221.137  | 0.31      |   | 13.5      |
| 309.2801 | 309.2788 | -4.07     |   | 42.62     |
| 311.2948 | 311.2945 | -1.19     |   | 50.39     |
| 566.2951 | 566.292  | -5.64     |   | 19.33     |
| 568.3613 |          |           | 2 | 615.56    |
| 568.8614 |          |           | 2 | 604.71    |
| 569.3156 | 569.3154 | -0.38     | 1 | 379015.69 |
| 570.3182 |          |           | 1 | 74985.11  |
| 571.3204 |          |           | 1 | 8635.67   |

| Compound Label      | m/z      | RT    | Algorithm  | Mass     |
|---------------------|----------|-------|------------|----------|
| Cpd 83: C28 H52 O14 | 613.3431 | 20.73 | Auto MS/MS | 612.3356 |

Compound Chromatograms

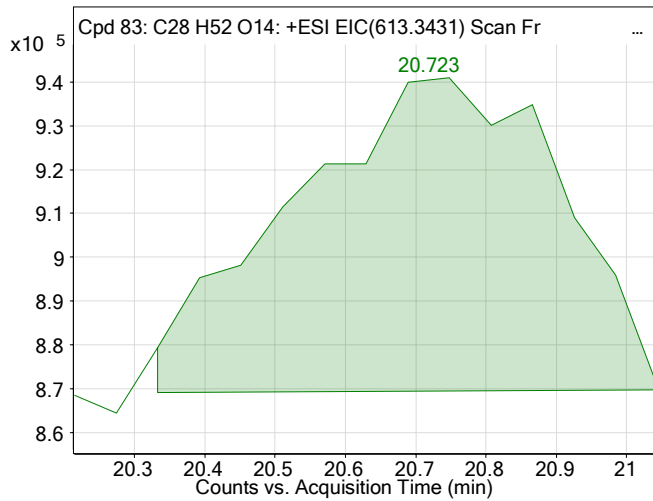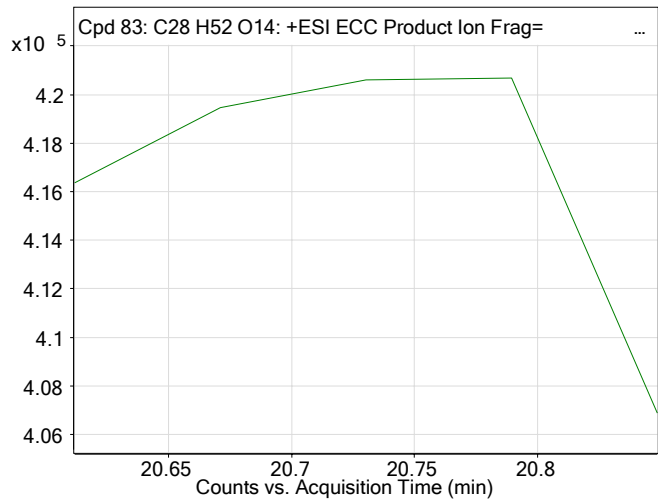

MS Spectrum

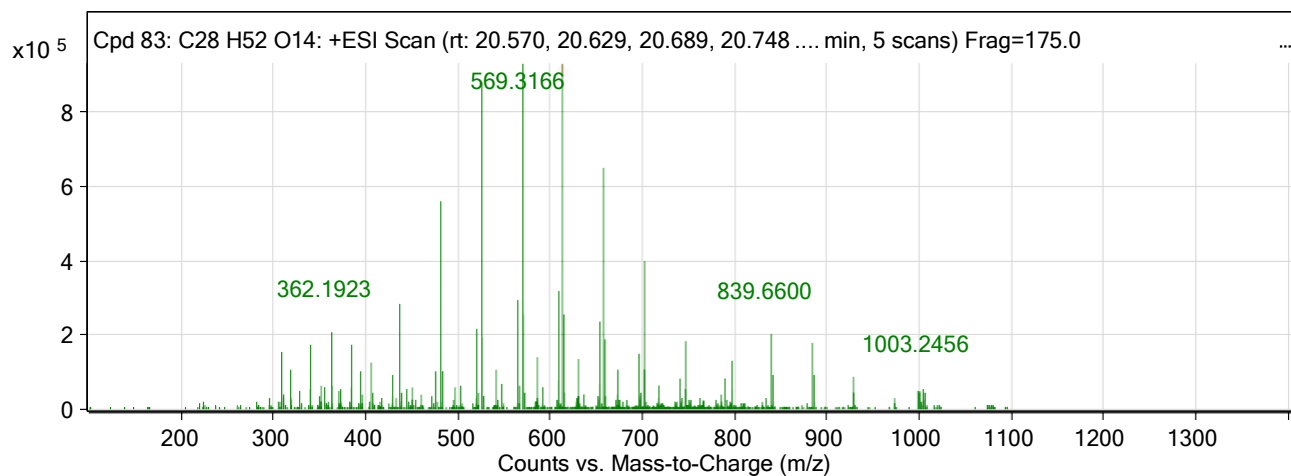

MS Zoomed Spectrum

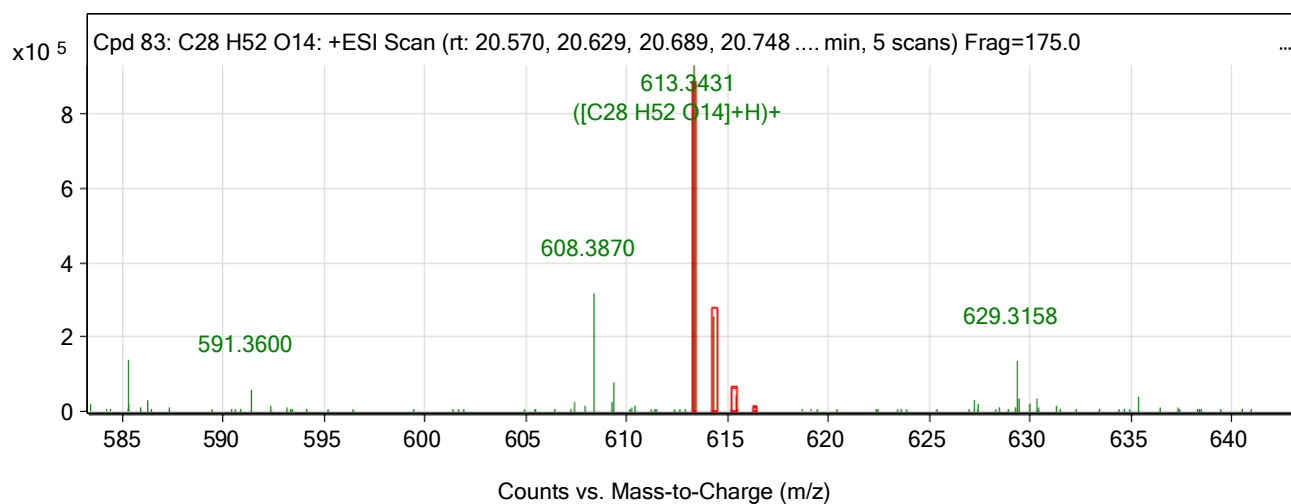

MS Spectrum Peak List

| m/z      | Calc m/z | Diff(ppm) | z | Abund      | Formula                                         | Ion                |
|----------|----------|-----------|---|------------|-------------------------------------------------|--------------------|
| 481.2634 |          |           | 1 | 557861.13  |                                                 |                    |
| 525.2903 |          |           | 1 | 878224.63  |                                                 |                    |
| 569.3166 |          |           | 1 | 1058599.75 |                                                 |                    |
| 608.387  |          |           | 1 | 317239.75  |                                                 |                    |
| 613.3431 | 613.343  | -0.17     | 1 | 930779     | C <sub>28</sub> H <sub>52</sub> O <sub>14</sub> | (M+H) <sup>+</sup> |
| 614.3457 | 614.3464 | 1.21      | 1 | 254644.34  | C <sub>28</sub> H <sub>52</sub> O <sub>14</sub> | (M+H) <sup>+</sup> |
| 615.3476 | 615.3489 | 2.09      | 1 | 45512.98   | C <sub>28</sub> H <sub>52</sub> O <sub>14</sub> | (M+H) <sup>+</sup> |
| 616.3537 | 616.3515 | -3.42     | 1 | 6275.49    | C <sub>28</sub> H <sub>52</sub> O <sub>14</sub> | (M+H) <sup>+</sup> |
| 657.3692 |          |           | 1 | 648769.31  |                                                 |                    |
| 701.3952 |          |           | 1 | 397825.75  |                                                 |                    |

MSMS Spectrum

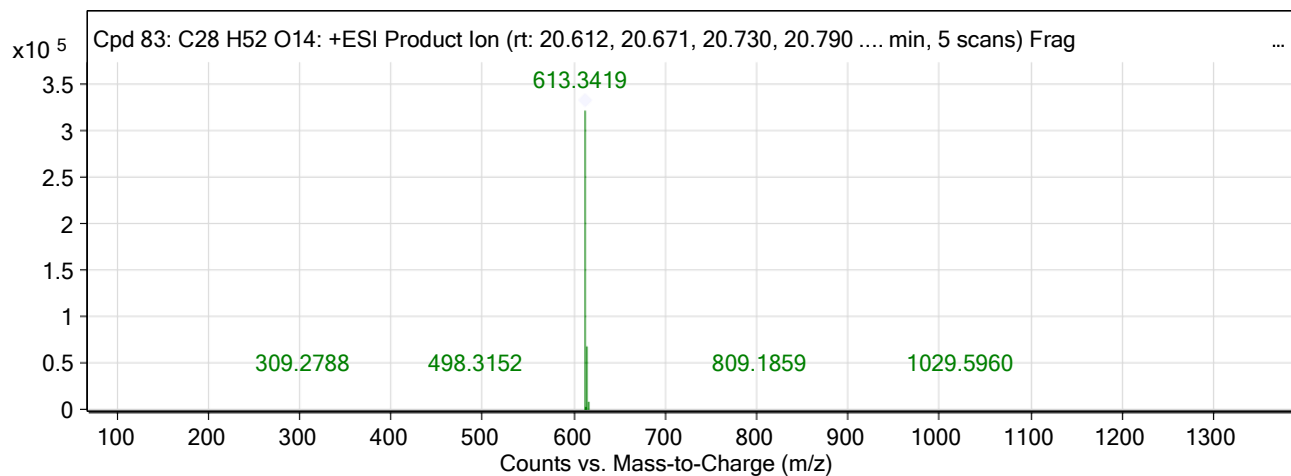

**MS/MS Spectrum Peak List**

| m/z      | Calc m/z | Diff(ppm)  | z | Abund     |
|----------|----------|------------|---|-----------|
| 133.0861 | 133.0859 | -1.69      | 1 | 52.8      |
| 177.1119 | 177.1121 | 1.35       |   | 36.9      |
| 233.175  | 233.1747 | -1.22      |   | 28.16     |
| 309.2788 | 309.2788 | -0.08      | 1 | 79.65     |
| 610.3182 | 305.1595 | -499999.35 | 2 | 35.14     |
| 611.3278 | 305.6634 | -500000.79 | 2 | 26.92     |
| 612.6384 |          |            | 2 | 2383.24   |
| 613.3419 | 613.343  | 1.71       | 1 | 321444.41 |
| 614.3447 |          |            | 1 | 66908.69  |
| 615.3468 |          |            | 1 | 8240.13   |

| Compound Label      | m/z      | RT     | Algorithm  | Mass     |
|---------------------|----------|--------|------------|----------|
| Cpd 84: C26 H48 O13 | 569.3167 | 20.832 | Auto MS/MS | 568.3092 |

**Compound Chromatograms**

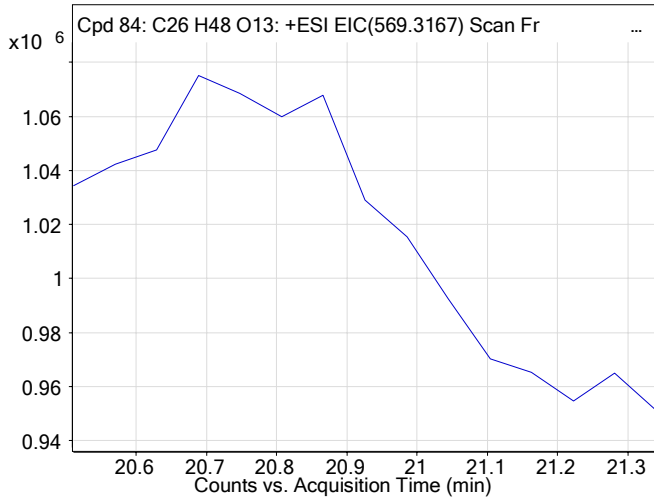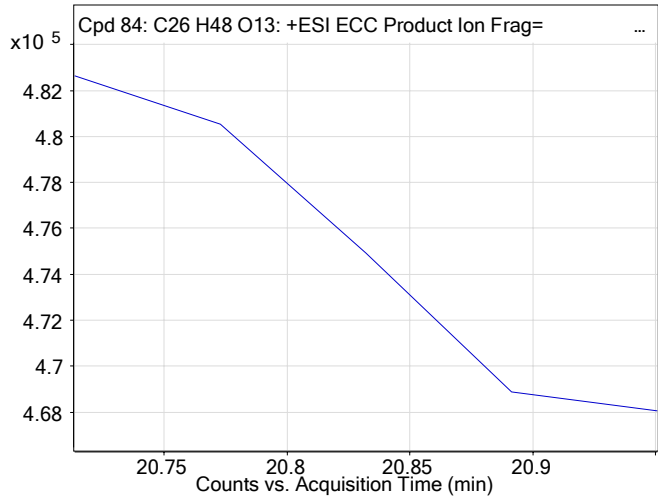

MS Spectrum

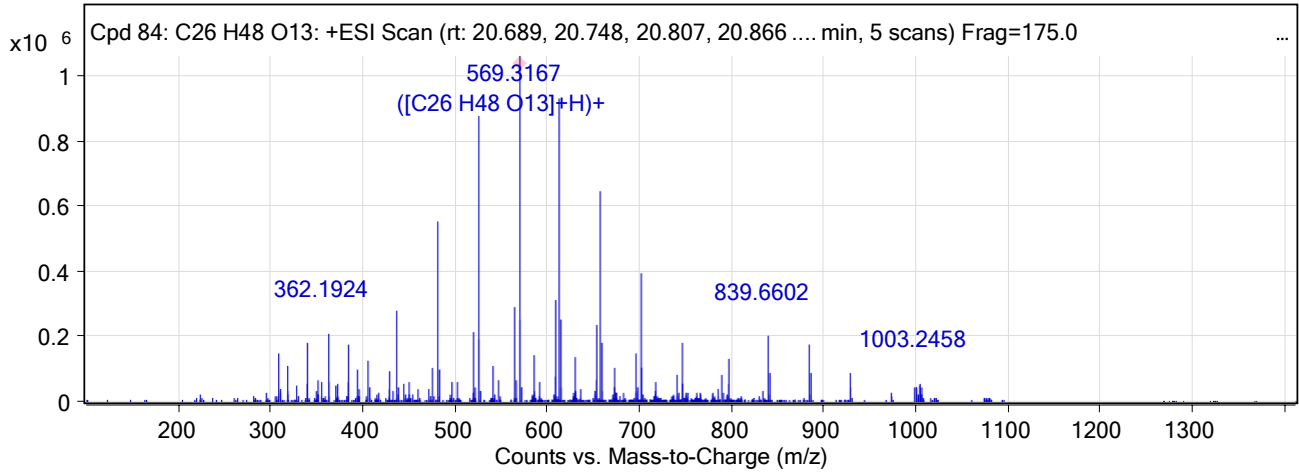

MS Zoomed Spectrum

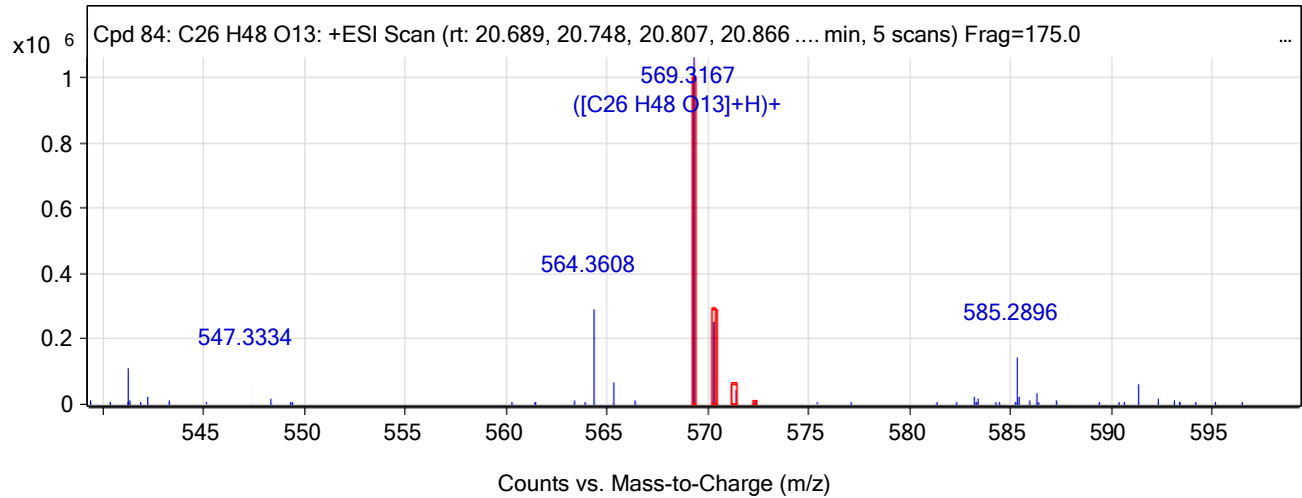

**MS Spectrum Peak List**

| m/z      | Calc m/z | Diff(ppm) | z | Abund     | Formula     | Ion    |
|----------|----------|-----------|---|-----------|-------------|--------|
| 481.2635 |          |           | 1 | 553781.75 |             |        |
| 525.2904 |          |           | 1 | 874875.31 |             |        |
| 569.3167 | 569.3168 | 0.13      | 1 | 1060016   | C26 H48 O13 | (M+H)+ |
| 570.3194 | 570.3202 | 1.43      | 1 | 253619.45 | C26 H48 O13 | (M+H)+ |
| 571.3214 | 571.3226 | 2.08      | 1 | 42225.76  | C26 H48 O13 | (M+H)+ |
| 572.3238 | 572.3253 | 2.58      | 1 | 5681.76   | C26 H48 O13 | (M+H)+ |
| 608.3872 |          |           | 1 | 312799.56 |             |        |
| 613.3432 |          |           | 1 | 931009.88 |             |        |
| 657.3693 |          |           | 1 | 646027.63 |             |        |
| 701.3953 |          |           | 1 | 396088.44 |             |        |

MSMS Spectrum

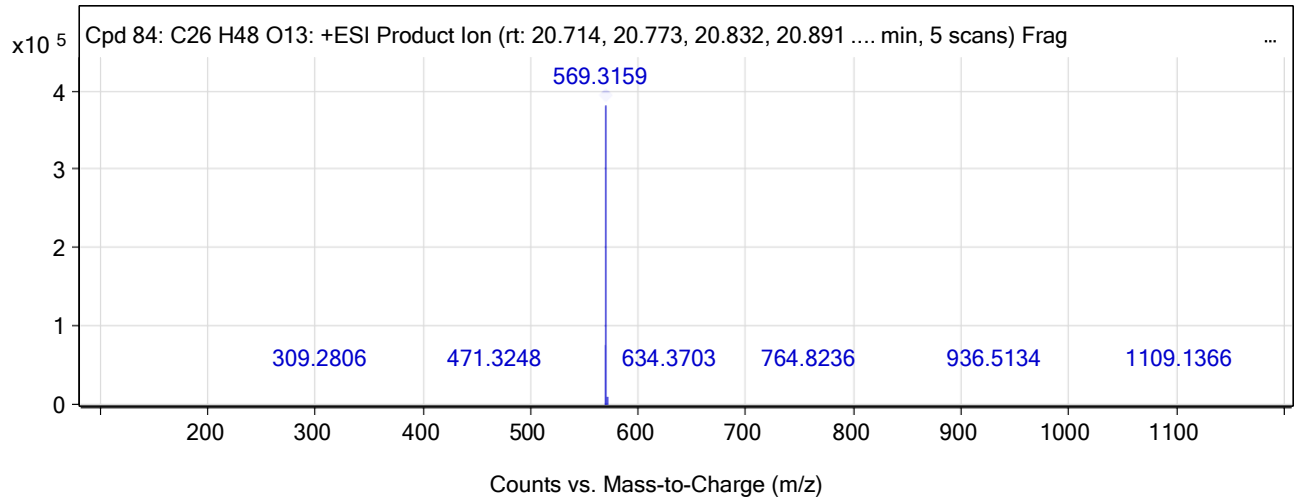

**MS/MS Spectrum Peak List**

| m/z      | Calc m/z | Diff(ppm)  | z | Abund     |
|----------|----------|------------|---|-----------|
| 146.0956 | 146.0937 | -13.02     |   | 13.88     |
| 210.1136 | 210.1098 | -18.04     |   | 18.66     |
| 265.2493 | 265.2526 | 12.42      |   | 13.34     |
| 309.2806 | 309.2788 | -5.81      |   | 37.72     |
| 471.3248 | 471.3316 | 14.53      |   | 17.02     |
| 538.2903 | 269.1489 | -499992.98 | 2 | 20.78     |
| 568.6122 |          |            | 2 | 793.97    |
| 569.3159 | 569.3168 | 1.53       | 1 | 381023.56 |
| 570.3185 |          |            | 1 | 74487.7   |
| 571.3206 |          |            | 1 | 8772.77   |

| Compound Label      | m/z      | RT     | Algorithm  | Mass     |
|---------------------|----------|--------|------------|----------|
| Cpd 85: C28 H52 O14 | 613.3432 | 21.027 | Auto MS/MS | 612.3357 |

Compound Chromatograms



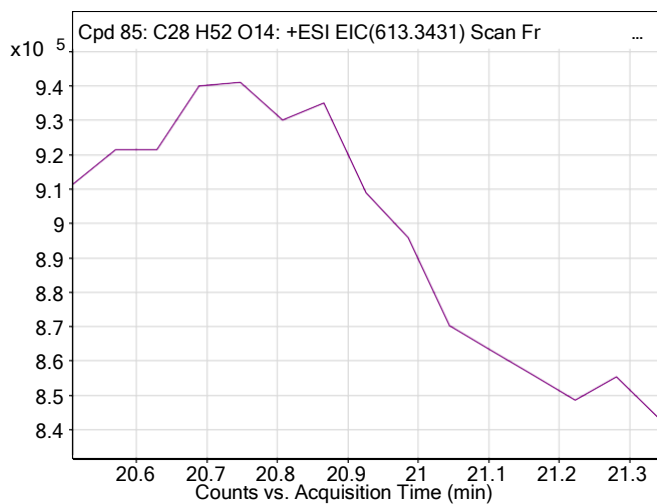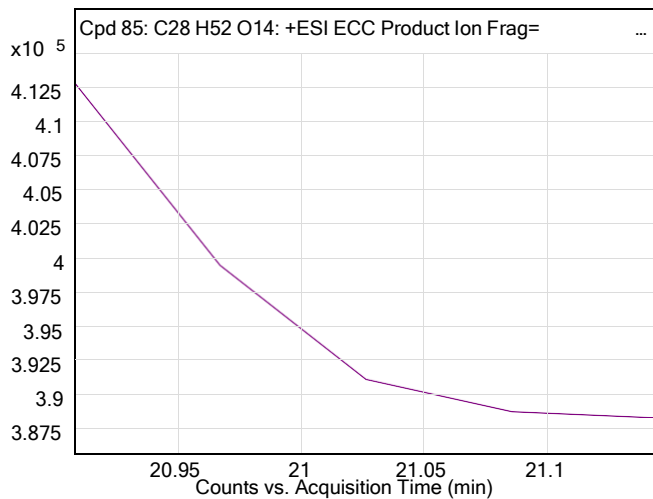

MS Spectrum

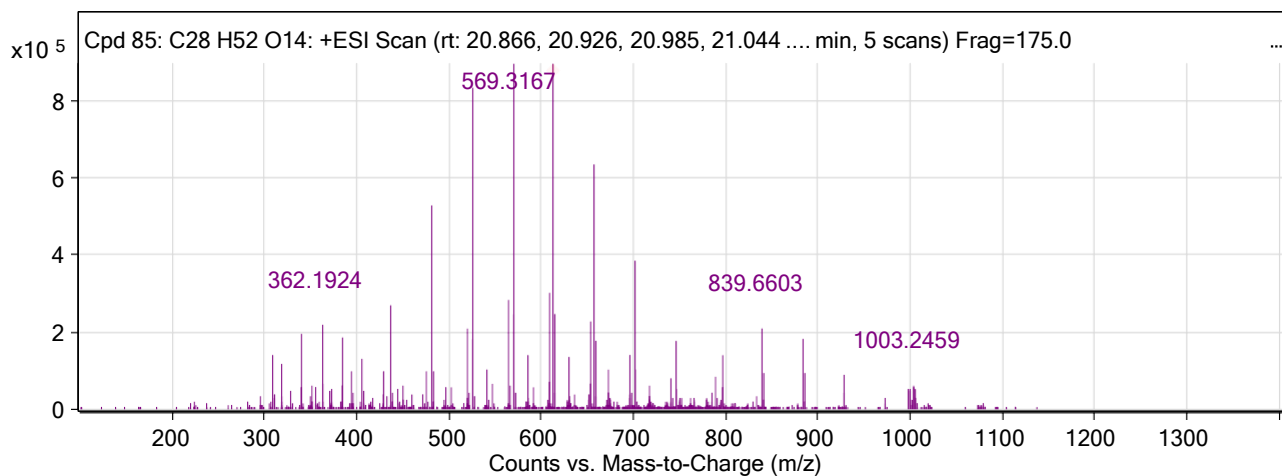

MS Zoomed Spectrum

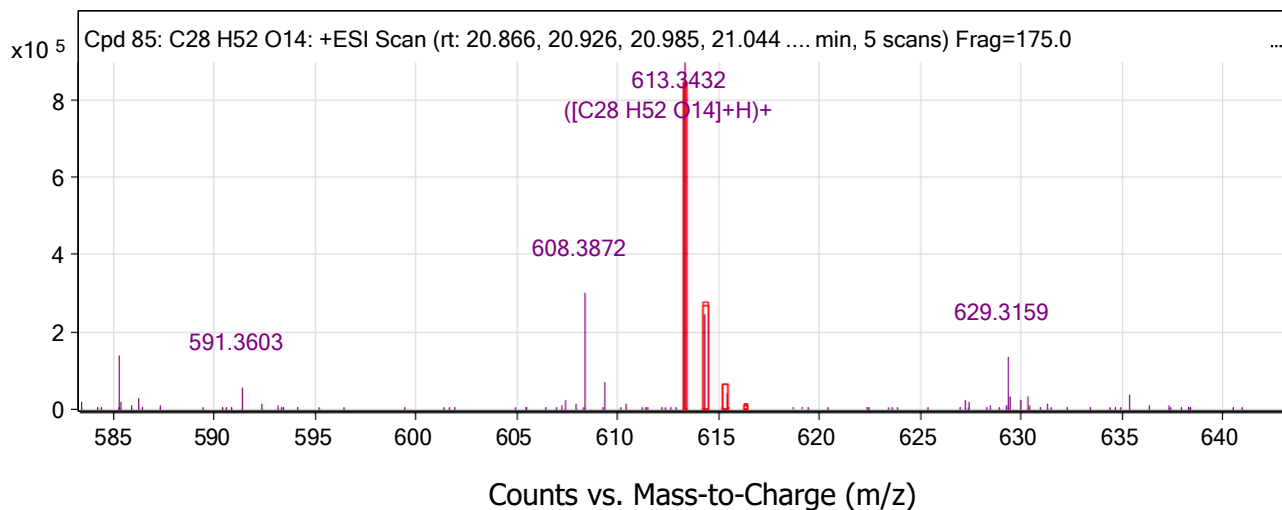

MS Spectrum Peak List

| m/z      | Calc m/z | Diff(ppm) | z | Abund      | Formula     | Ion    |
|----------|----------|-----------|---|------------|-------------|--------|
| 481.2635 |          |           | 1 | 527171.88  |             |        |
| 525.2904 |          |           | 1 | 832653.13  |             |        |
| 569.3167 |          |           | 1 | 1015013.69 |             |        |
| 608.3872 |          |           | 1 | 301009.06  |             |        |
| 613.3432 | 613.343  | -0.37     | 1 | 894690.69  | C28 H52 O14 | (M+H)+ |
| 614.3458 | 614.3464 | 1.03      | 1 | 243687.55  | C28 H52 O14 | (M+H)+ |
| 615.3478 | 615.3489 | 1.8       | 1 | 43336.34   | C28 H52 O14 | (M+H)+ |
| 616.354  | 616.3515 | -3.96     | 1 | 6045.07    | C28 H52 O14 | (M+H)+ |

MSMS Spectrum

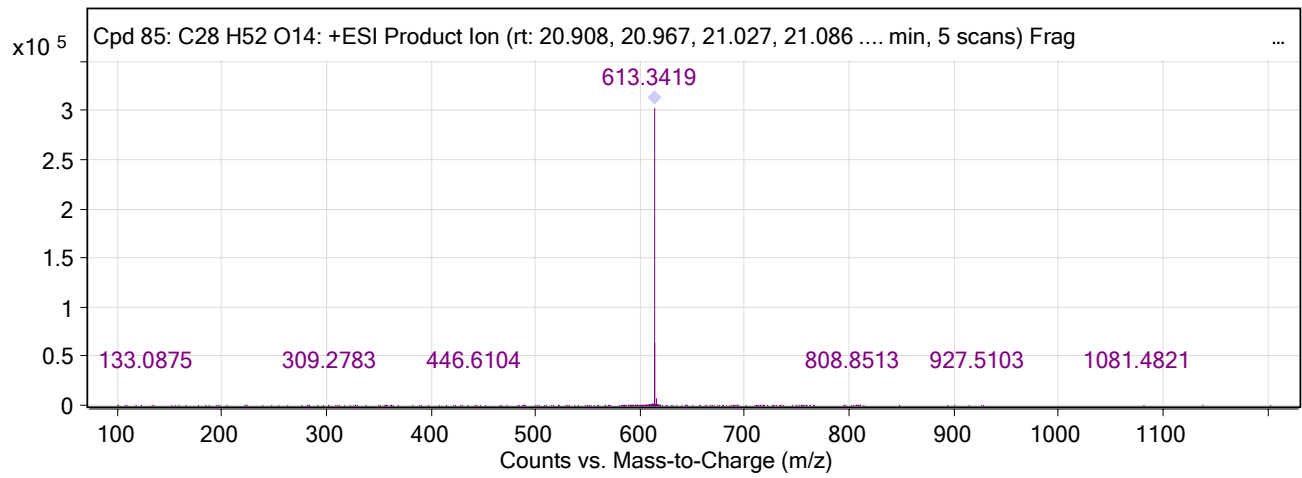

MS/MS Spectrum Peak List

| m/z      | Calc m/z | Diff(ppm) | z | Abund     |
|----------|----------|-----------|---|-----------|
| 133.0875 | 133.0859 | -11.78    |   | 33.99     |
| 309.2783 | 309.2788 | 1.73      | 1 | 49.36     |
| 612.3874 |          |           | 2 | 1944.05   |
| 612.6384 |          |           | 2 | 2364.05   |
| 612.8896 |          |           | 2 | 2199.9    |
| 613.1403 |          |           | 2 | 1087.17   |
| 613.3419 | 613.343  | 1.7       | 1 | 302760.25 |
| 614.3446 |          |           | 1 | 64078.77  |
| 615.3469 |          |           | 1 | 7836.38   |
| 615.4157 |          |           | 2 | 1133.17   |

| Compound Label         | m/z      | RT     | Algorithm  | Mass     |
|------------------------|----------|--------|------------|----------|
| Cpd 86: C24 H46 N3 O12 | 569.3166 | 21.129 | Auto MS/MS | 568.3092 |

Compound Chromatograms

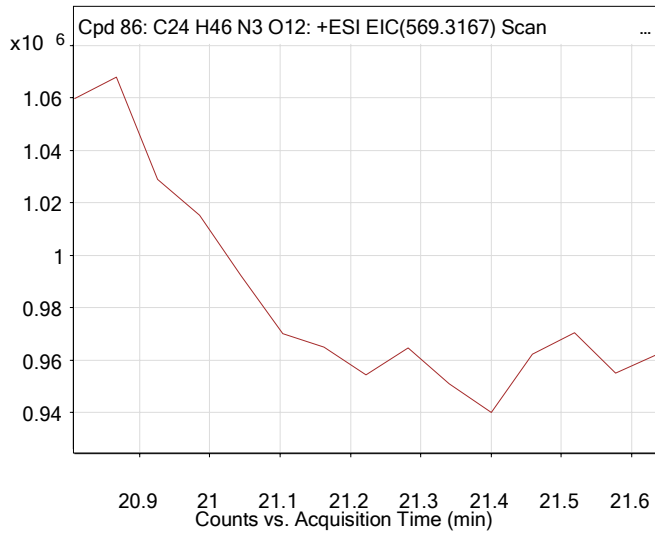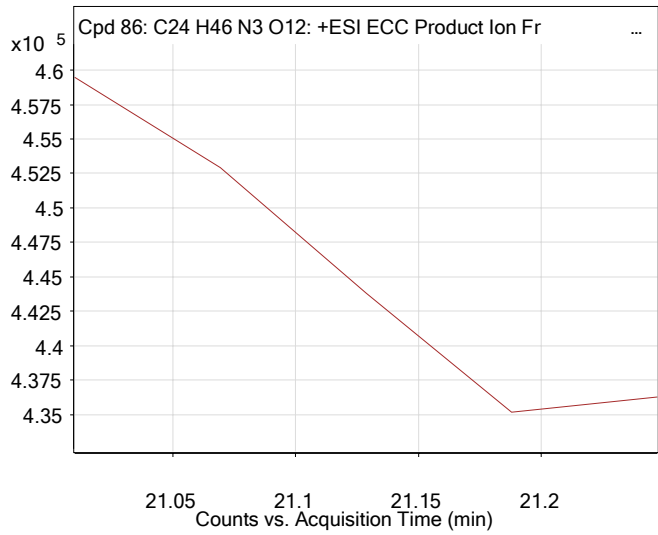

MS Spectrum

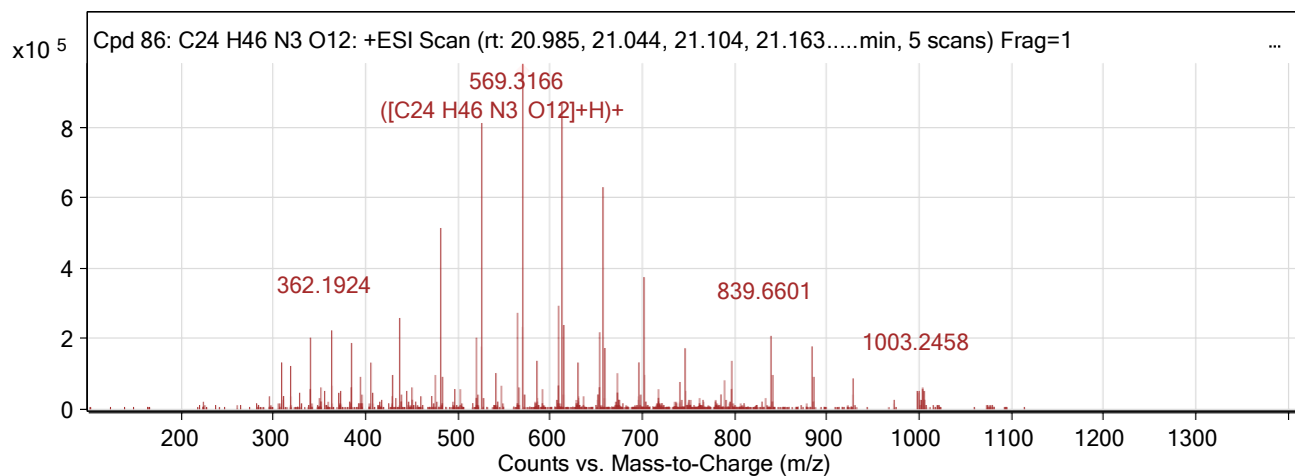

MS Zoomed Spectrum

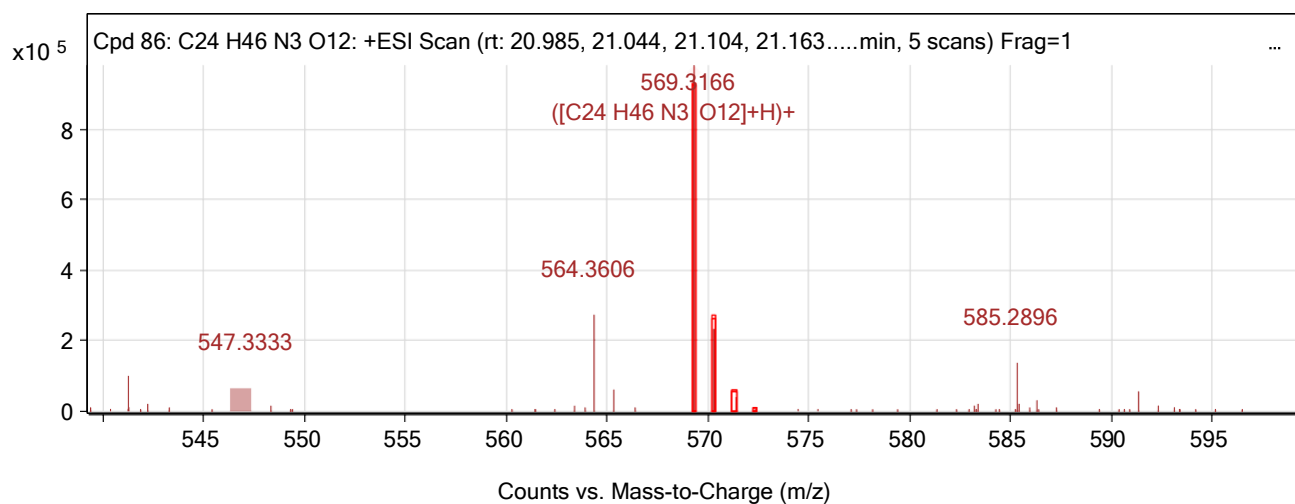

MS Spectrum Peak List

| m/z      | Calc m/z | Diff(ppm) | z | Abund     | Formula                                                        | Ion                |
|----------|----------|-----------|---|-----------|----------------------------------------------------------------|--------------------|
| 481.2634 |          |           | 1 | 512403.81 |                                                                |                    |
| 525.2903 |          |           | 1 | 807483.13 |                                                                |                    |
| 569.3166 | 569.3154 | -2.03     | 1 | 979597.38 | C <sub>24</sub> H <sub>46</sub> N <sub>3</sub> O <sub>12</sub> | (M+H) <sup>+</sup> |
| 570.3193 | 570.3186 | -1.14     | 1 | 235036.47 | C <sub>24</sub> H <sub>46</sub> N <sub>3</sub> O <sub>12</sub> | (M+H) <sup>+</sup> |
| 571.3213 | 571.3209 | -0.64     | 1 | 38795.34  | C <sub>24</sub> H <sub>46</sub> N <sub>3</sub> O <sub>12</sub> | (M+H) <sup>+</sup> |
| 572.3243 | 572.3235 | -1.43     | 1 | 5420.92   | C <sub>24</sub> H <sub>46</sub> N <sub>3</sub> O <sub>12</sub> | (M+H) <sup>+</sup> |
| 608.387  |          |           | 1 | 292471.78 |                                                                |                    |
| 613.3431 |          |           | 1 | 866851.38 |                                                                |                    |
| 657.3691 |          |           | 1 | 624298.75 |                                                                |                    |
| 701.3952 |          |           | 1 | 373002.5  |                                                                |                    |

MSMS Spectrum

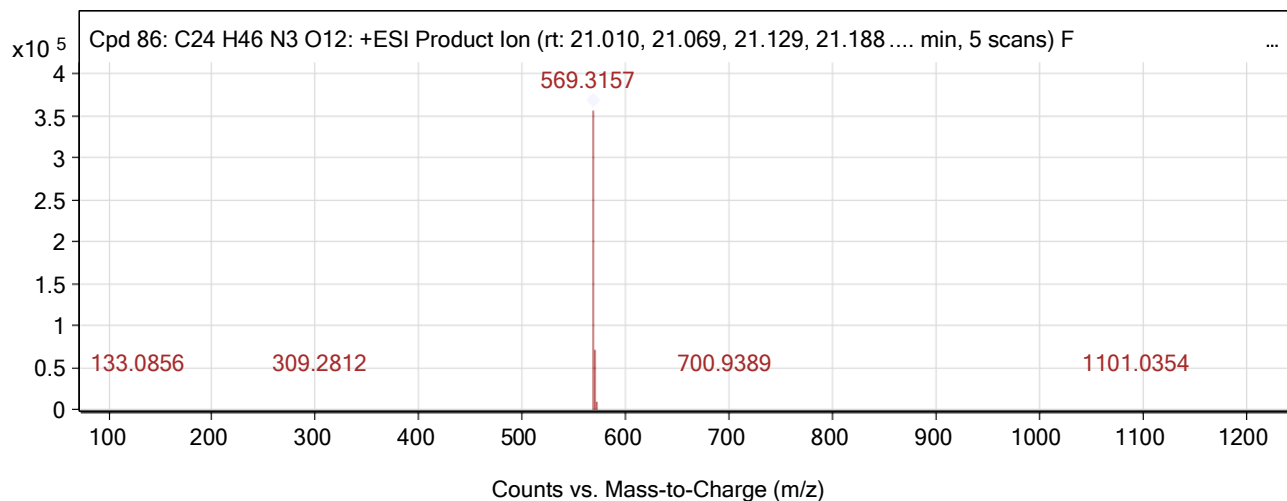

**MS/MS Spectrum Peak List**

| m/z      | Calc m/z | Diff(ppm)  | z | Abund     |
|----------|----------|------------|---|-----------|
| 107.0709 | 107.0689 | -18.3      |   | 19.09     |
| 133.0856 | 133.0859 | 2.5        |   | 51.15     |
| 153.002  | 153.0016 | -2.32      |   | 19.47     |
| 195.1221 | 195.1214 | -3.69      |   | 29.77     |
| 263.1894 | 131.5937 | -500003.8  | 2 | 27.15     |
| 283.1766 | 283.1778 | 4.33       |   | 18.3      |
| 309.2812 | 309.2788 | -7.7       |   | 40.12     |
| 311.2924 | 311.2931 | 2.28       |   | 35.35     |
| 515.3063 | 257.6528 | -500000.61 | 2 | 17.81     |
| 569.3157 | 569.3154 | -0.5       | 1 | 356144.59 |

| Compound Label      | m/z      | RT     | Algorithm  | Mass     |
|---------------------|----------|--------|------------|----------|
| Cpd 87: C28 H52 O14 | 613.3433 | 21.323 | Auto MS/MS | 612.3358 |

**Compound Chromatograms**

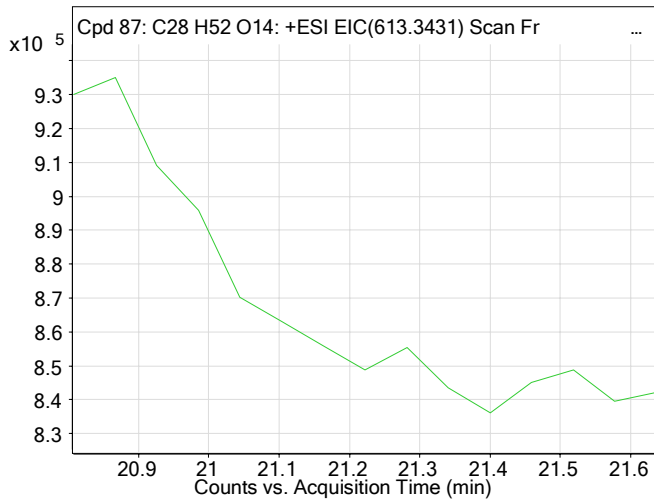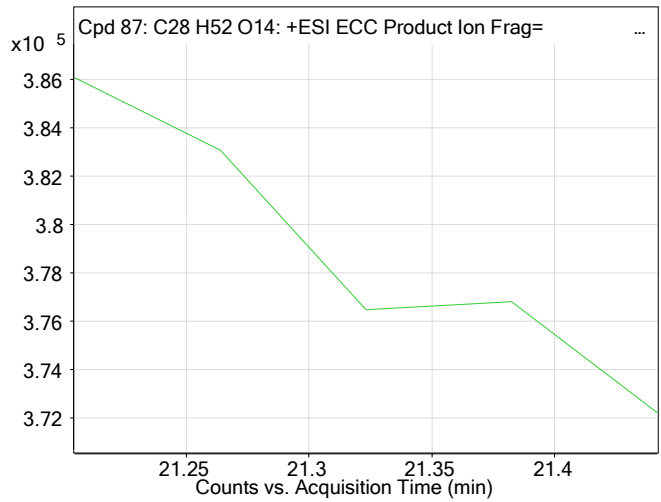

MS Spectrum

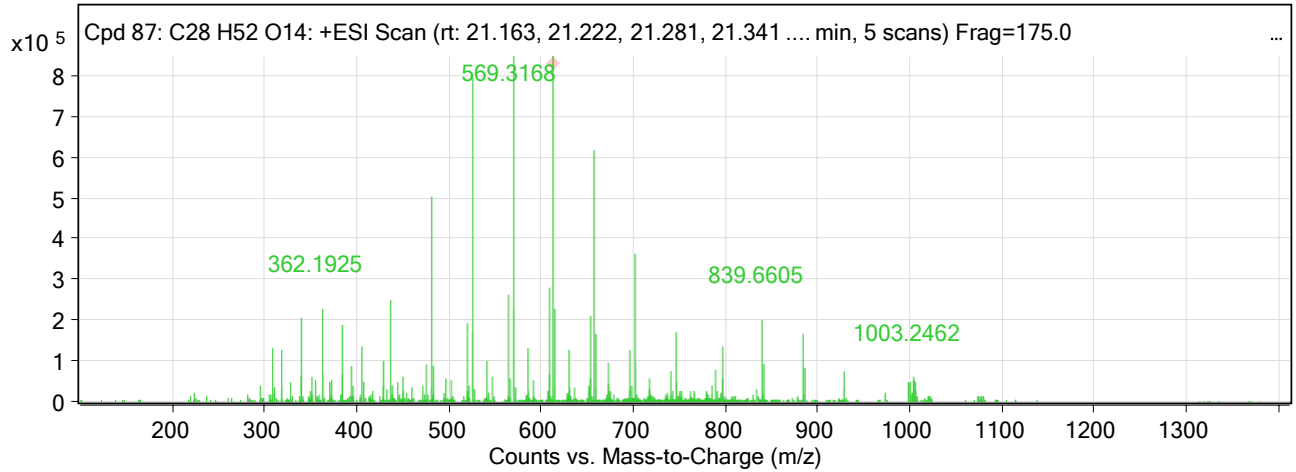

MS Zoomed Spectrum

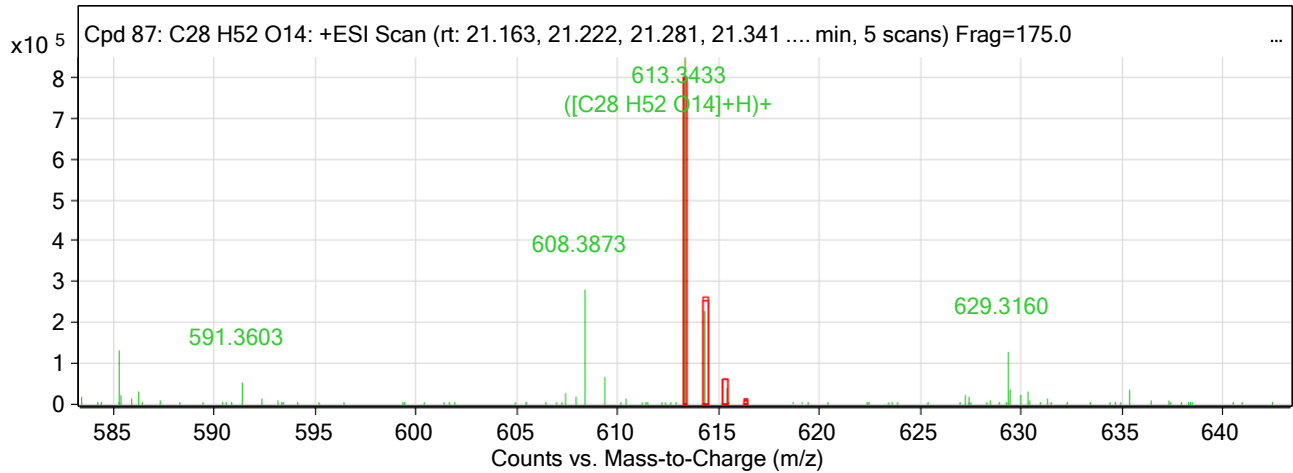

**MS Spectrum Peak List**

| m/z      | Calc m/z | Diff(ppm) | z | Abund     | Formula     | Ion    |
|----------|----------|-----------|---|-----------|-------------|--------|
| 481.2636 |          |           | 1 | 501663.06 |             |        |
| 525.2905 |          |           | 1 | 794739.75 |             |        |
| 569.3168 |          |           | 1 | 955154.13 |             |        |
| 608.3873 |          |           | 1 | 281792.47 |             |        |
| 613.3433 | 613.343  | -0.54     | 1 | 847972.63 | C28 H52 O14 | (M+H)+ |
| 614.3459 | 614.3464 | 0.8       | 1 | 229623.83 | C28 H52 O14 | (M+H)+ |
| 615.3479 | 615.3489 | 1.54      | 1 | 40640.29  | C28 H52 O14 | (M+H)+ |
| 616.3544 | 616.3515 | -4.58     | 1 | 5610.51   | C28 H52 O14 | (M+H)+ |
| 657.3693 |          |           | 1 | 614591.44 |             |        |
| 701.3955 |          |           | 1 | 364782.47 |             |        |

**MS/MS Spectrum**

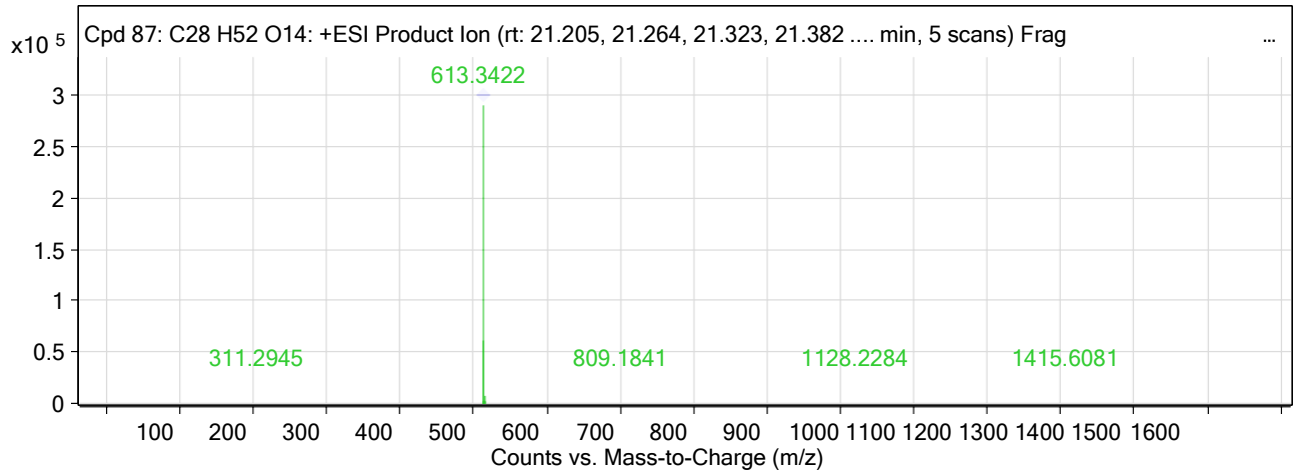

**MS/MS Spectrum Peak List**

| m/z      | Calc m/z | Diff(ppm) | z | Abund     |
|----------|----------|-----------|---|-----------|
| 131.0682 | 131.0703 | 16.06     |   | 20.29     |
| 133.0875 | 133.0859 | -11.55    |   | 44.14     |
| 175.1317 | 175.1329 | 6.91      |   | 43.81     |
| 177.1131 | 177.1121 | -5.52     |   | 28.17     |
| 309.279  | 309.2788 | -0.6      |   | 62.57     |
| 311.2945 | 311.2945 | -0.04     |   | 65.64     |
| 612.6382 |          |           |   | 2521.64   |
| 613.3422 | 613.343  | 1.24      | 1 | 289984.38 |
| 614.345  |          |           | 1 | 60023.27  |
| 615.3472 |          |           | 1 | 7287.14   |

| Compound Label      | m/z      | RT     | Algorithm  | Mass     |
|---------------------|----------|--------|------------|----------|
| Cpd 88: C26 H48 O13 | 569.3169 | 21.425 | Auto MS/MS | 568.3095 |

**Compound Chromatograms**

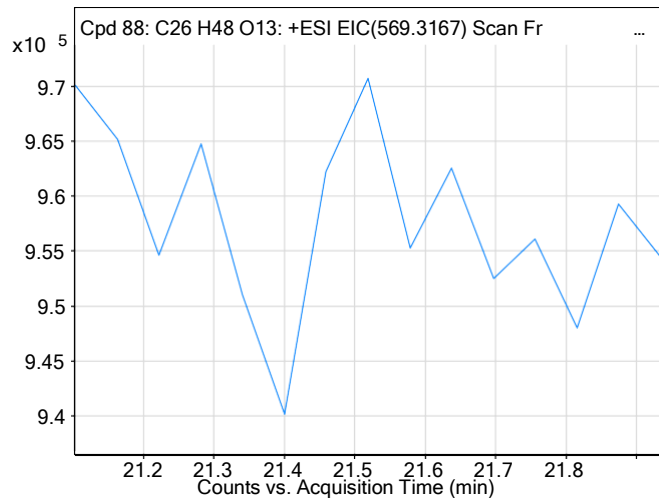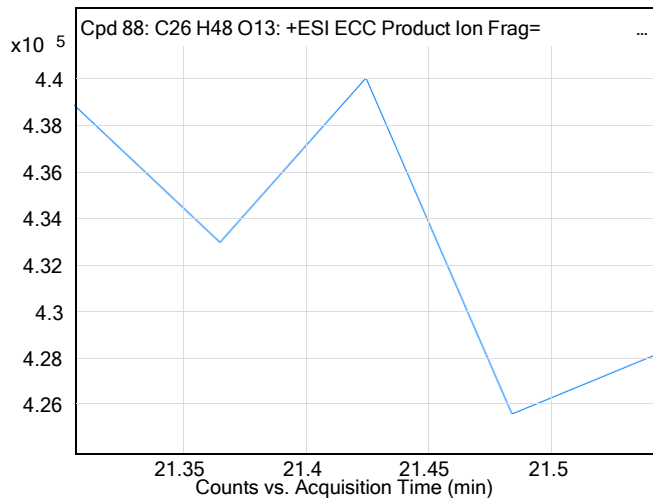

MS Spectrum

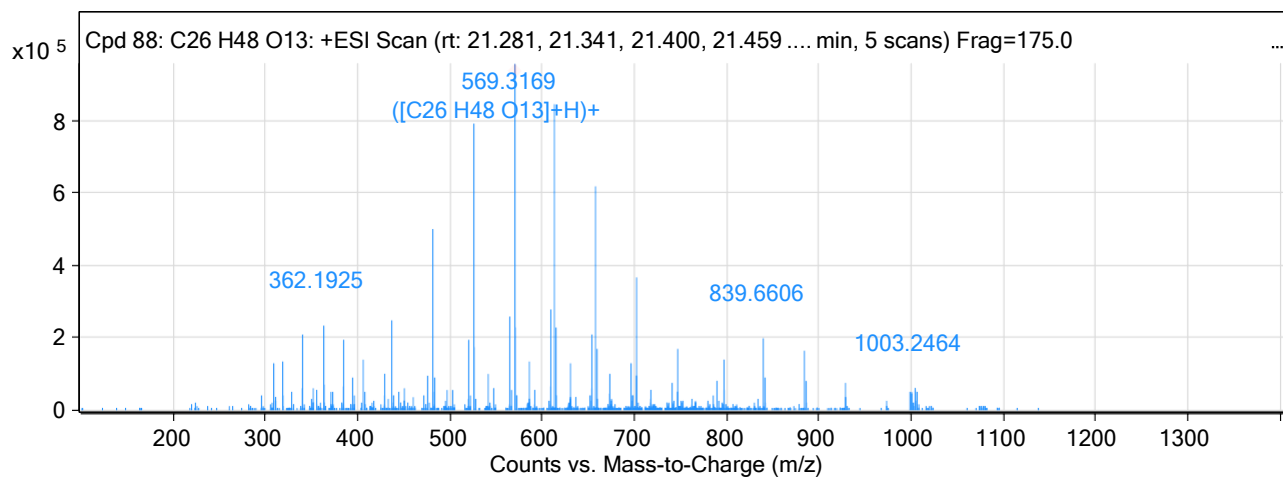

MS Zoomed Spectrum

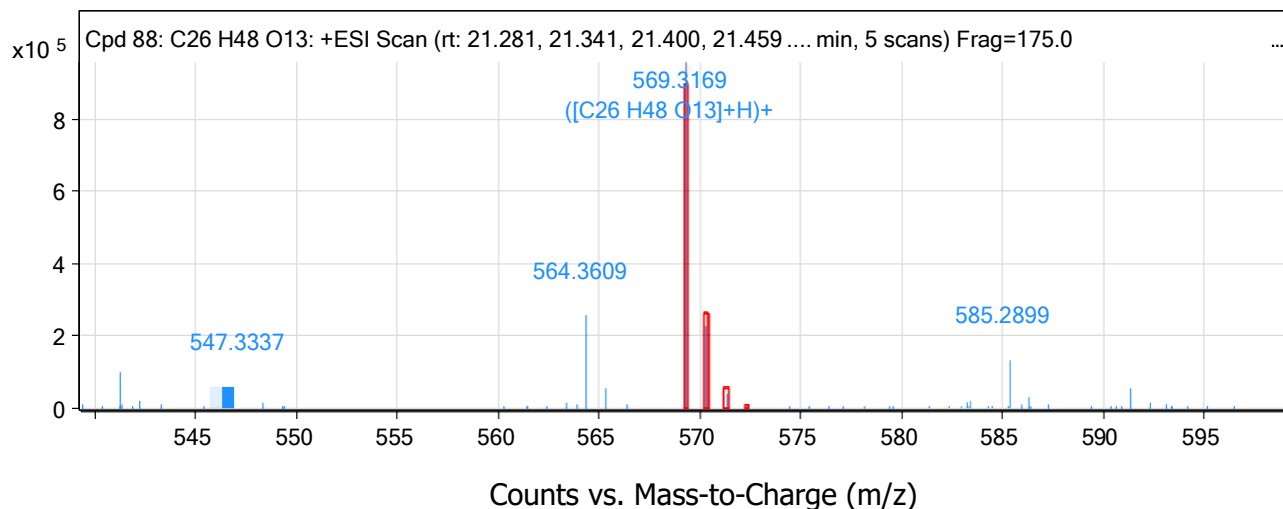

MS Spectrum Peak List

| m/z      | Calc m/z | Diff(ppm) | z | Abund     | Formula     | Ion    |
|----------|----------|-----------|---|-----------|-------------|--------|
| 481.2637 |          |           | 1 | 500838.84 |             |        |
| 525.2906 |          |           | 1 | 791898.19 |             |        |
| 569.3169 | 569.3168 | -0.22     | 1 | 957778.31 | C26 H48 O13 | (M+H)+ |
| 570.3196 | 570.3202 | 0.99      | 1 | 227518.22 | C26 H48 O13 | (M+H)+ |
| 571.3216 | 571.3226 | 1.74      | 1 | 37412.02  | C26 H48 O13 | (M+H)+ |
| 572.3247 | 572.3253 | 1.05      | 1 | 5202.72   | C26 H48 O13 | (M+H)+ |
| 608.3874 |          |           | 1 | 277338.25 |             |        |
| 613.3434 |          |           | 1 | 845831.63 |             |        |
| 657.3695 |          |           | 1 | 615305.69 |             |        |

MSMS Spectrum

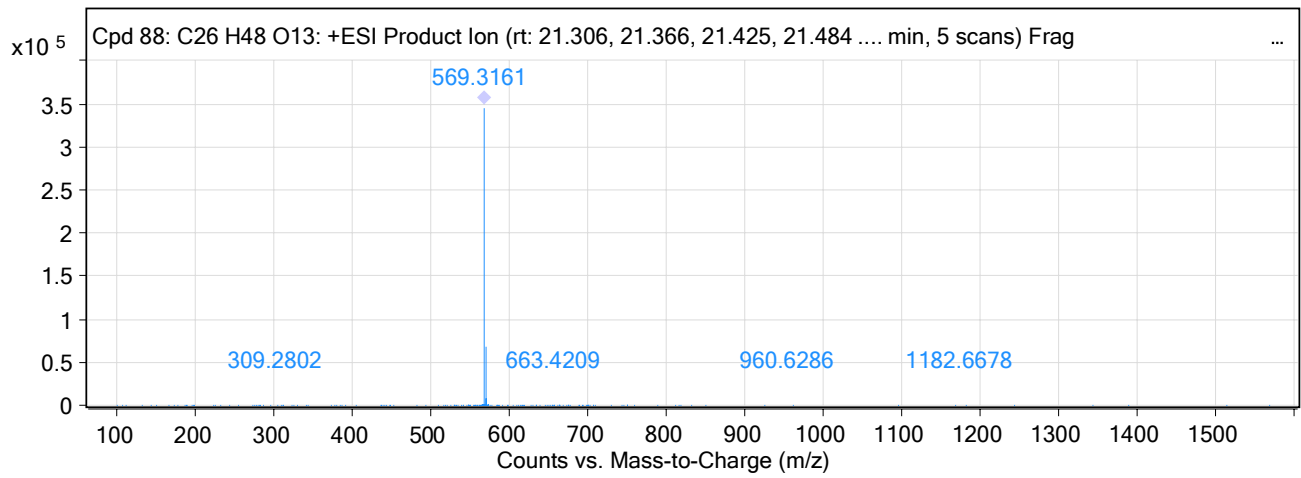

MS/MS Spectrum PeakList

| m/z      | Calc m/z | Diff(ppm) | z | Abund    |
|----------|----------|-----------|---|----------|
| 133.0857 | 133.0859 | 1.41      |   | 38.3     |
| 177.1114 | 177.1121 | 4.29      |   | 27.08    |
| 233.1783 | 233.1747 | -15.35    |   | 14.86    |
| 283.2585 | 283.2632 | 16.49     |   | 14.11    |
| 309.2802 | 309.2788 | -4.58     |   | 37.76    |
| 311.2951 | 311.2945 | -2.05     | 1 | 34.4     |
| 329.2276 | 329.2323 | 14.2      |   | 22.14    |
| 538.2895 | 538.2984 | 16.56     |   | 14.54    |
| 569.3161 | 569.3168 | 1.23      | 1 | 345400.5 |
| 570.3187 |          |           | 1 | 67577.54 |

| Compound Label                                          | m/z     | RT    | Algorithm  | Mass     |
|---------------------------------------------------------|---------|-------|------------|----------|
| Cpd 89: C <sub>28</sub> H <sub>52</sub> O <sub>14</sub> | 613.343 | 21.62 | Auto MS/MS | 612.3355 |

Compound Chromatograms

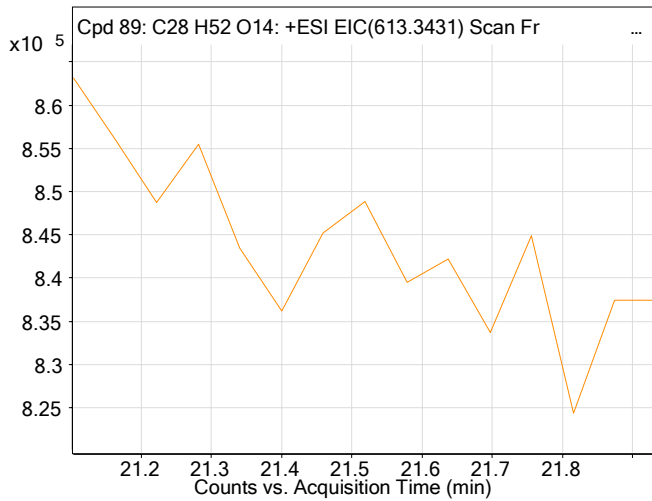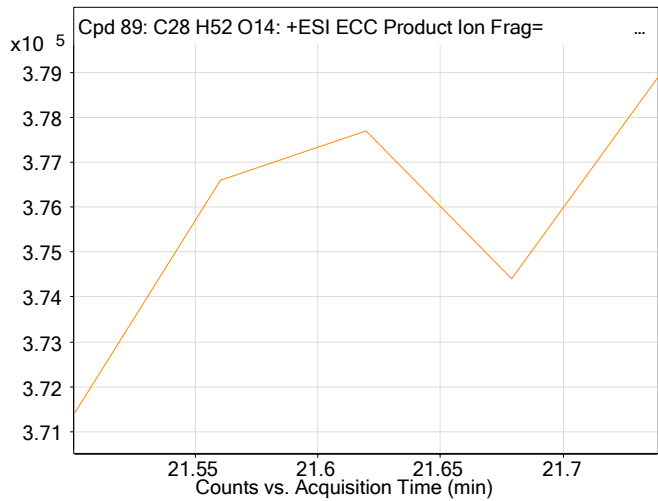

MS Spectrum

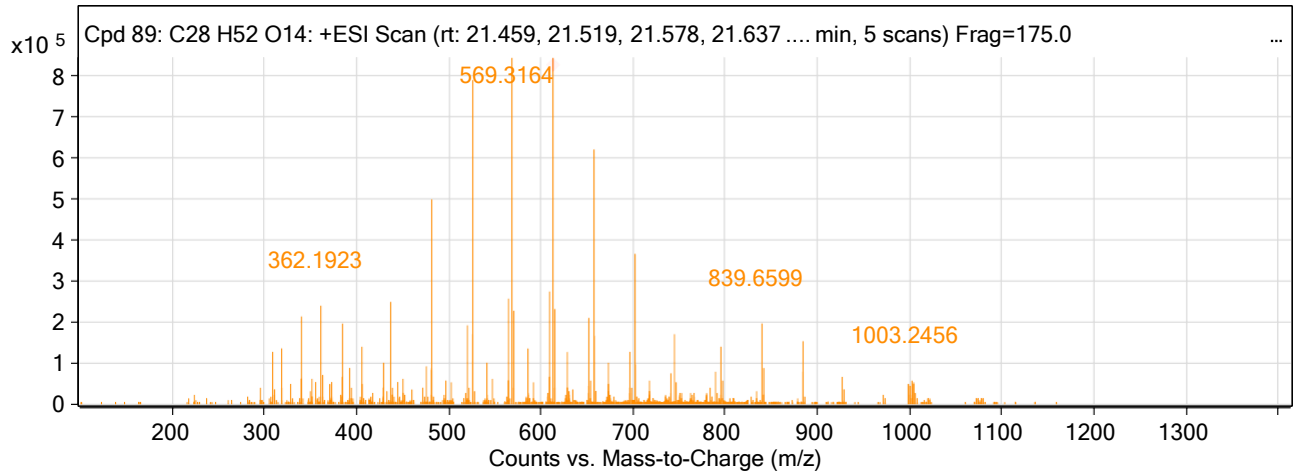

MS Zoomed Spectrum

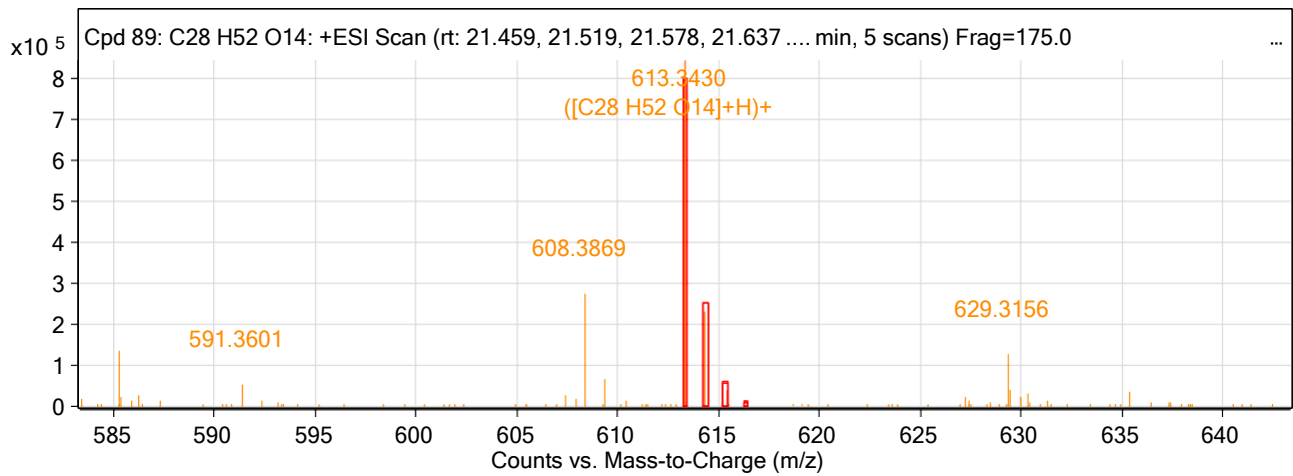

MS Spectrum Peak List

| m/z      | Calc m/z | Diff(ppm) | z | Abund     | Formula     | Ion    |
|----------|----------|-----------|---|-----------|-------------|--------|
| 481.2633 |          |           | 1 | 495701.75 |             |        |
| 525.2902 |          |           | 1 | 787241.63 |             |        |
| 569.3164 |          |           | 1 | 960648    |             |        |
| 608.3869 |          |           | 1 | 274058.81 |             |        |
| 613.343  | 613.343  | 0.04      | 1 | 841898.31 | C28 H52 O14 | (M+H)+ |
| 614.3455 | 614.3464 | 1.45      | 1 | 228213.03 | C28 H52 O14 | (M+H)+ |
| 615.3476 | 615.3489 | 2.09      | 1 | 40824.43  | C28 H52 O14 | (M+H)+ |
| 616.3542 | 616.3515 | -4.26     | 1 | 5683.57   | C28 H52 O14 | (M+H)+ |
| 657.3689 |          |           | 1 | 616528.19 |             |        |
| 701.395  |          |           | 1 | 363027.31 |             |        |

MSMS Spectrum

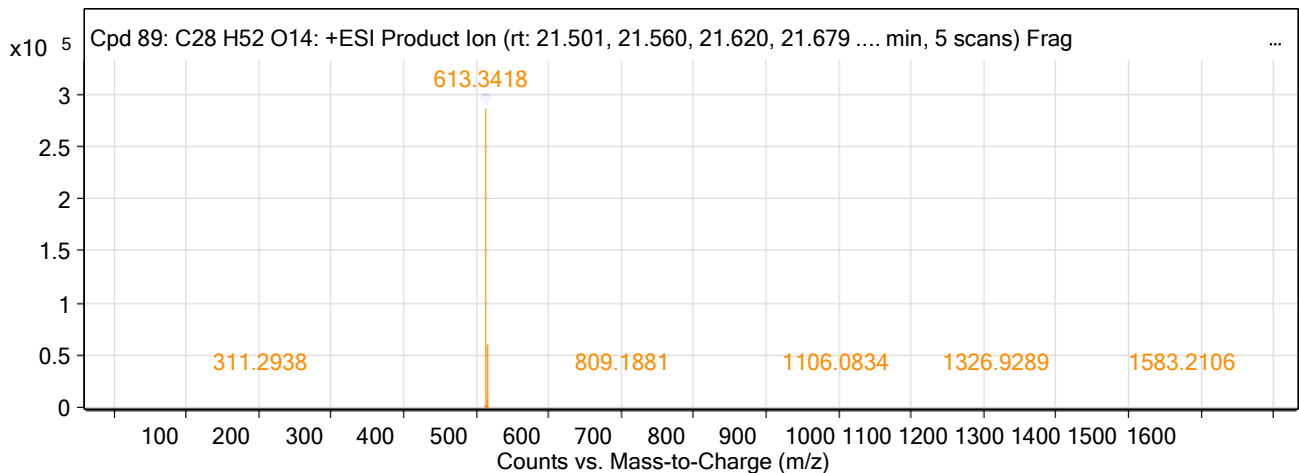



**MS/MS Spectrum Peak List**

| m/z      | Calc m/z | Diff(ppm) | z | Abund     |
|----------|----------|-----------|---|-----------|
| 177.1116 | 177.1121 | 2.75      |   | 37.38     |
| 309.277  | 309.2788 | 5.73      | 1 | 57.22     |
| 612.3876 |          |           | 2 | 2152.49   |
| 612.638  |          |           |   | 2497.91   |
| 612.8889 |          |           | 2 | 1930.78   |
| 613.1399 |          |           | 1 | 1067.59   |
| 613.3418 | 613.343  | 1.86      | 1 | 286156.59 |
| 614.3445 |          |           | 1 | 60805.26  |
| 615.347  |          |           | 1 | 7120.01   |
| 615.414  |          |           | 2 | 1270.65   |

| Compound Label         | m/z      | RT     | Algorithm  | Mass     |
|------------------------|----------|--------|------------|----------|
| Cpd 90: C24 H46 N3 O12 | 569.3162 | 21.722 | Auto MS/MS | 568.3088 |

**Compound Chromatograms**

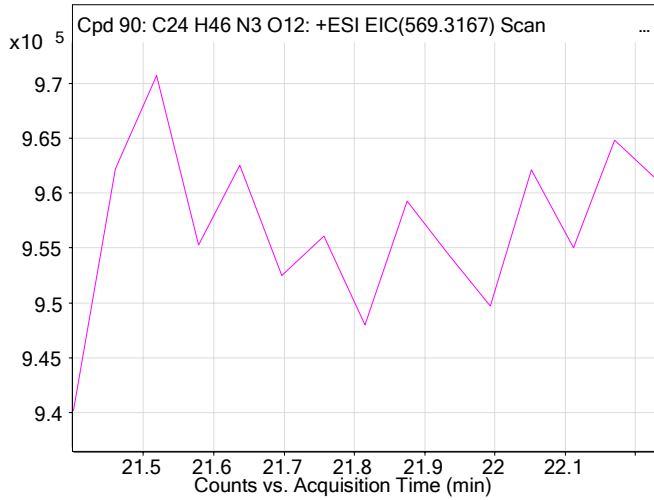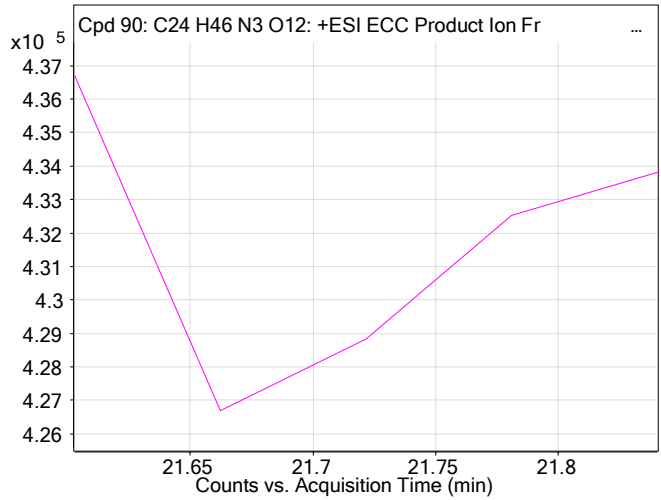

MS Spectrum

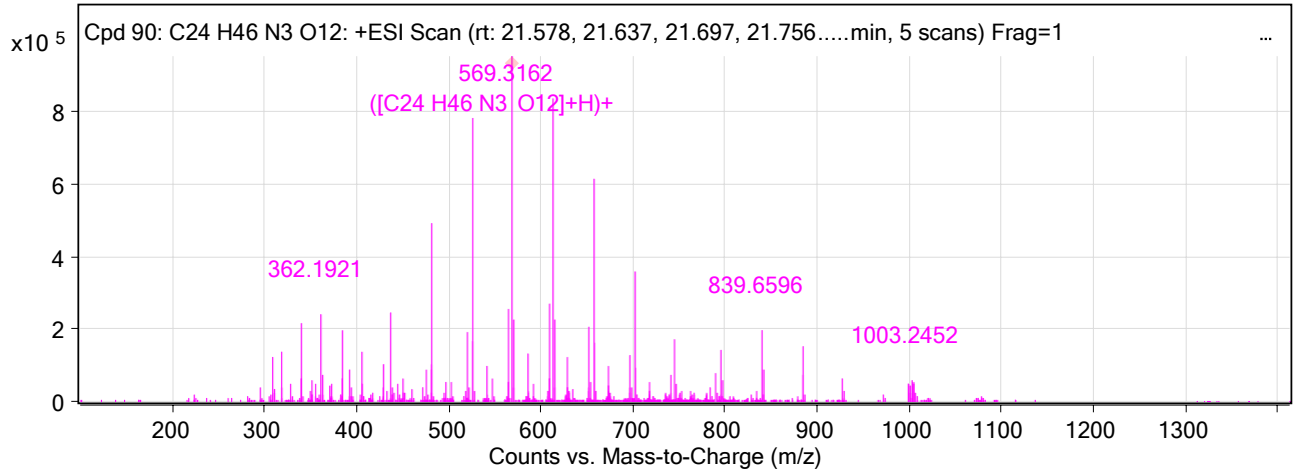

MS Zoomed Spectrum

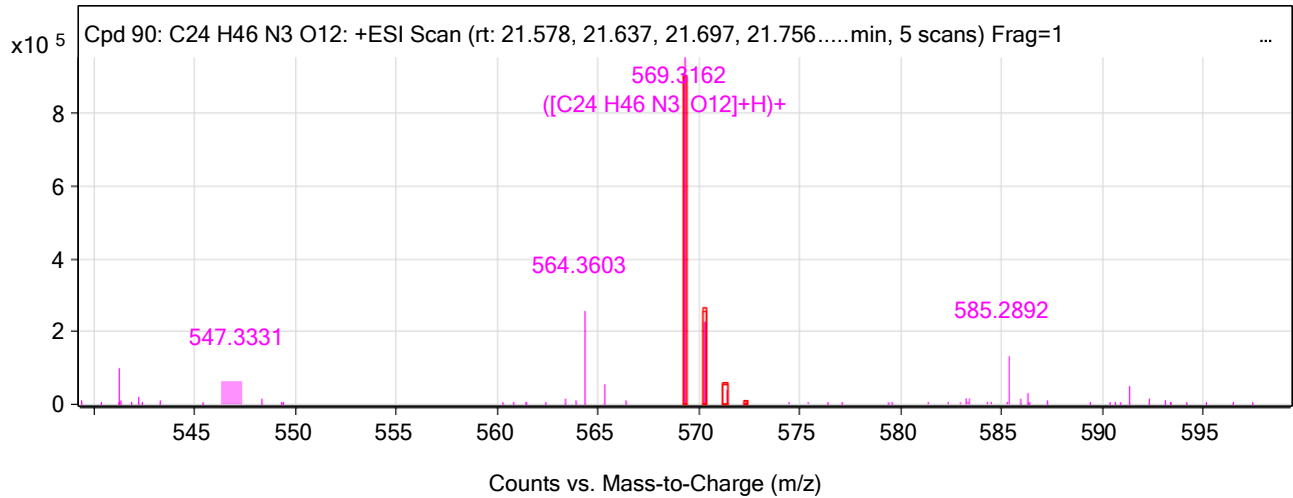

**MS Spectrum Peak List**

| m/z      | Calc m/z | Diff(ppm) | z | Abund     | Formula                                                        | Ion                |
|----------|----------|-----------|---|-----------|----------------------------------------------------------------|--------------------|
| 481.2631 |          |           | 1 | 492522.69 |                                                                |                    |
| 525.29   |          |           | 1 | 784522.88 |                                                                |                    |
| 569.3162 | 569.3154 | -1.38     | 1 | 954876    | C <sub>24</sub> H <sub>46</sub> N <sub>3</sub> O <sub>12</sub> | (M+H) <sup>+</sup> |
| 570.3189 | 570.3186 | -0.53     | 1 | 227012.47 | C <sub>24</sub> H <sub>46</sub> N <sub>3</sub> O <sub>12</sub> | (M+H) <sup>+</sup> |
| 571.321  | 571.3209 | -0.08     | 1 | 37717.49  | C <sub>24</sub> H <sub>46</sub> N <sub>3</sub> O <sub>12</sub> | (M+H) <sup>+</sup> |
| 572.3237 | 572.3235 | -0.32     | 1 | 5193.49   | C <sub>24</sub> H <sub>46</sub> N <sub>3</sub> O <sub>12</sub> | (M+H) <sup>+</sup> |
| 608.3867 |          |           | 1 | 272816.72 |                                                                |                    |
| 613.3428 |          |           | 1 | 836940.69 |                                                                |                    |
| 657.3687 |          |           | 1 | 613375.44 |                                                                |                    |
| 701.3948 |          |           | 1 | 360622.69 |                                                                |                    |

MSMS Spectrum

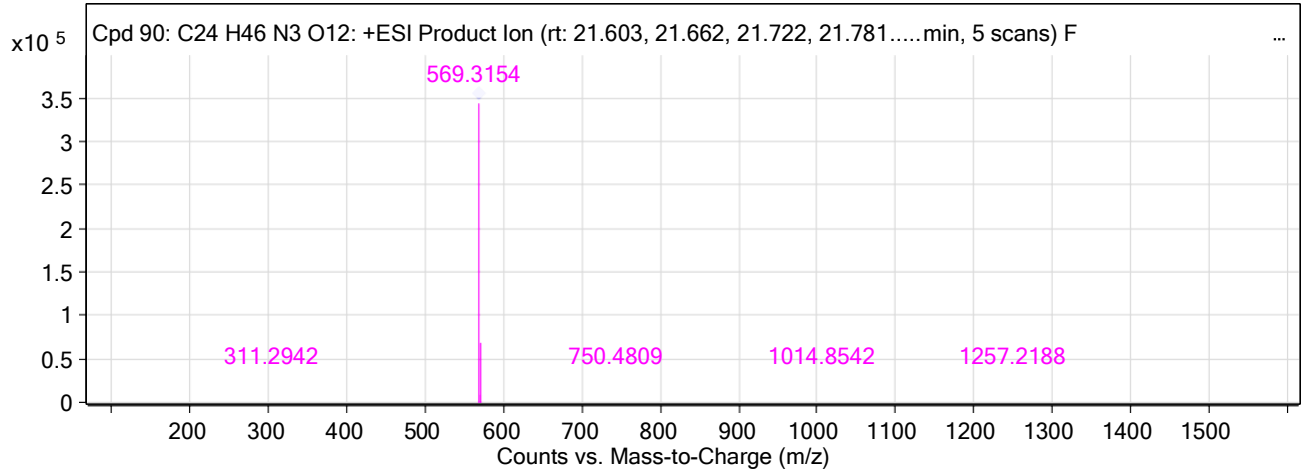

**MS/MS Spectrum PeakList**

| m/z      | Calc m/z | Diff(ppm)  | z | Abund     |
|----------|----------|------------|---|-----------|
| 108.0866 | 108.0808 | -53.49     |   | 19.86     |
| 133.0852 | 133.0846 | -5.02      |   | 33.76     |
| 239.1473 | 239.1476 | 1.33       |   | 15.3      |
| 311.2942 | 311.2945 | 0.79       |   | 50        |
| 387.2802 | 193.6424 | -499994.09 | 2 | 16.05     |
| 538.2942 | 269.1482 | -499997.83 | 2 | 32.71     |
| 568.6116 |          |            |   | 737.61    |
| 569.3154 | 569.3154 | -0.03      | 1 | 343816.41 |
| 570.3179 |          |            | 1 | 67716.4   |
| 571.3203 |          |            | 1 | 8382.67   |

| Compound Label                                          | m/z      | RT     | Algorithm  | Mass     |
|---------------------------------------------------------|----------|--------|------------|----------|
| Cpd 91: C <sub>28</sub> H <sub>52</sub> O <sub>14</sub> | 613.3433 | 21.916 | Auto MS/MS | 612.3358 |

Compound Chromatograms

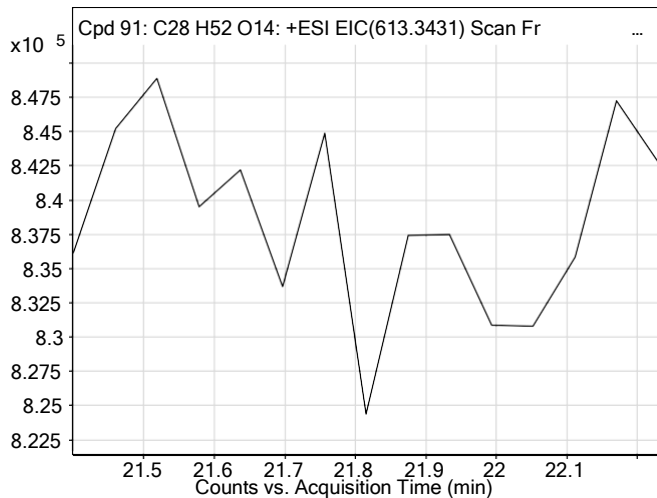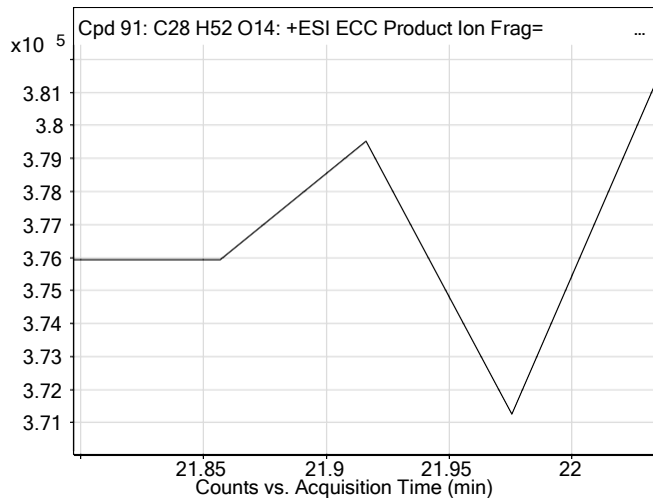

MS Spectrum

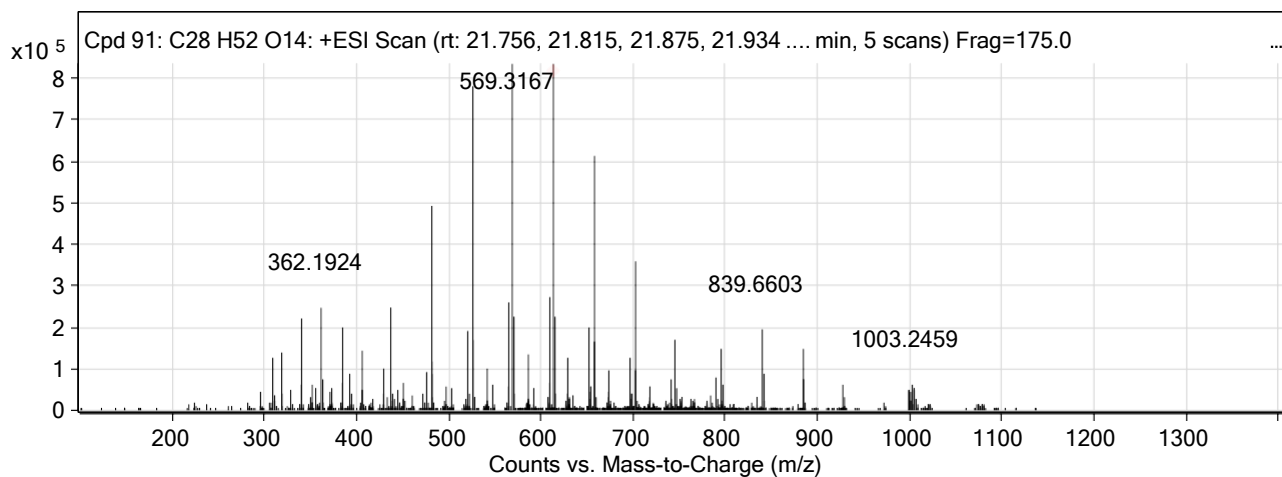

MS Zoomed Spectrum

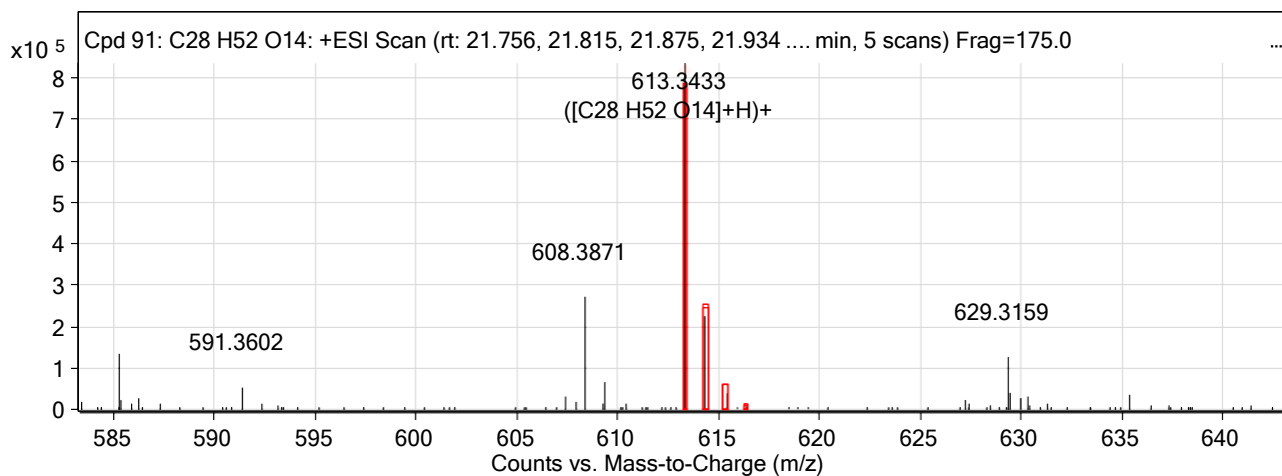

MS Spectrum Peak List

| m/z      | Calc m/z | Diff(ppm) | z | Abund     | Formula     | Ion    |
|----------|----------|-----------|---|-----------|-------------|--------|
| 481.2635 |          |           | 1 | 491774.94 |             |        |
| 525.2904 |          |           | 1 | 781088.13 |             |        |
| 569.3167 |          |           | 1 | 953497    |             |        |
| 608.3871 |          |           | 1 | 272284.03 |             |        |
| 613.3433 | 613.343  | -0.45     | 1 | 835016.13 | C28 H52 O14 | (M+H)+ |
| 614.3458 | 614.3464 | 1.02      | 1 | 224694.7  | C28 H52 O14 | (M+H)+ |
| 615.3478 | 615.3489 | 1.7       | 1 | 40432.45  | C28 H52 O14 | (M+H)+ |
| 616.3555 | 616.3515 | -6.42     | 1 | 5626.62   | C28 H52 O14 | (M+H)+ |
| 657.3692 |          |           | 1 | 609712.44 |             |        |

MSMS Spectrum

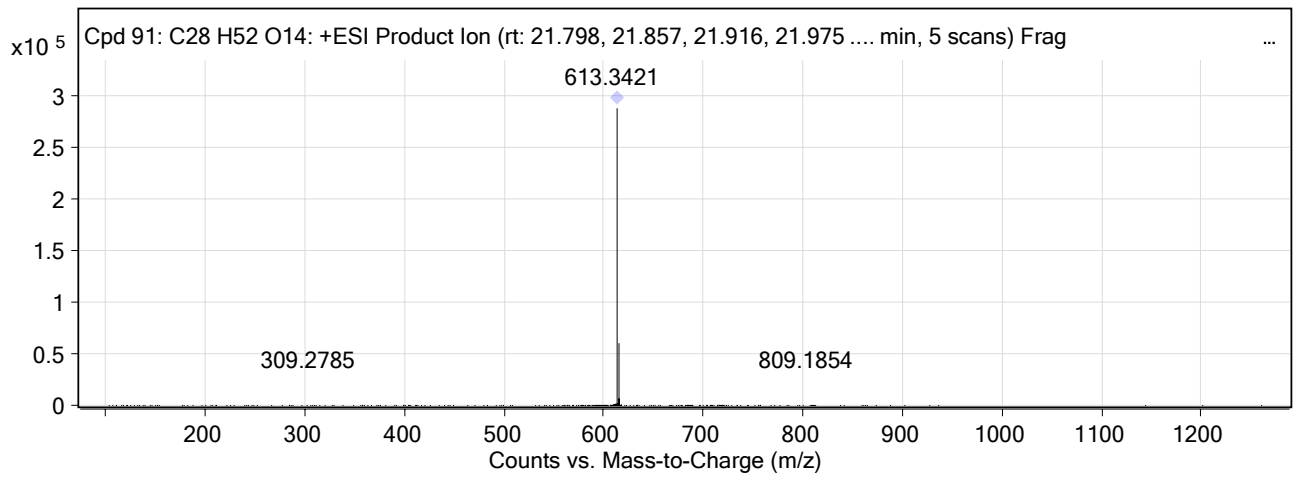

MS/MS Spectrum PeakList

| m/z      | Calc m/z | Diff(ppm)  | z | Abund     |
|----------|----------|------------|---|-----------|
| 199.1264 | 199.1329 | 32.42      |   | 26        |
| 309.2785 | 309.2788 | 1.1        |   | 73.19     |
| 311.2939 | 311.2945 | 1.79       |   | 68.23     |
| 357.0677 | 357.0664 | -3.76      | 1 | 22.36     |
| 609.3124 | 304.6556 | -500001.05 | 2 | 59.81     |
| 612.3281 | 612.3352 | 11.47      |   | 45.27     |
| 612.6386 |          |            | 2 | 2308.37   |
| 613.3421 | 613.343  | 1.47       | 1 | 287998.41 |
| 614.3448 |          |            | 1 | 59611.01  |
| 615.347  |          |            | 1 | 7294.69   |

| Compound Label         | m/z      | RT     | Algorithm  | Mass     |
|------------------------|----------|--------|------------|----------|
| Cpd 92: C24 H46 N3 O12 | 569.3166 | 22.018 | Auto MS/MS | 568.3092 |

Compound Chromatograms

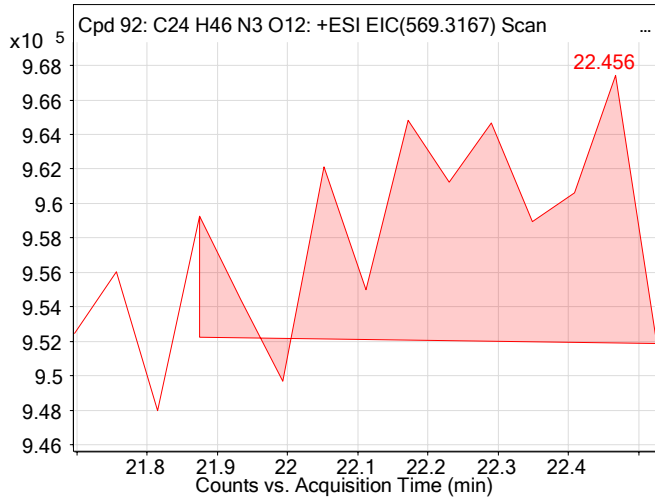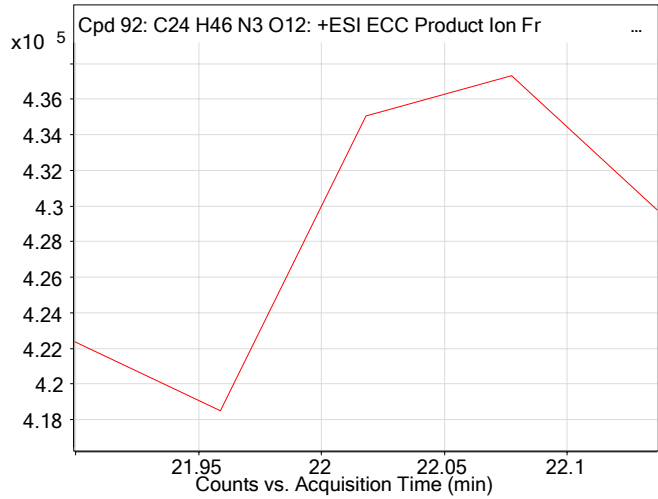

MS Spectrum

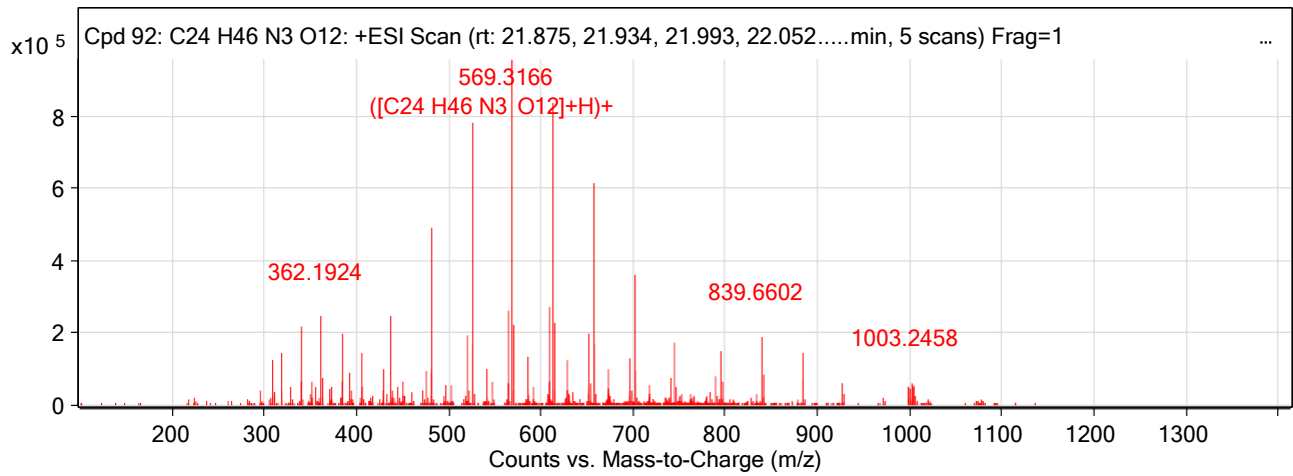

MS Zoomed Spectrum

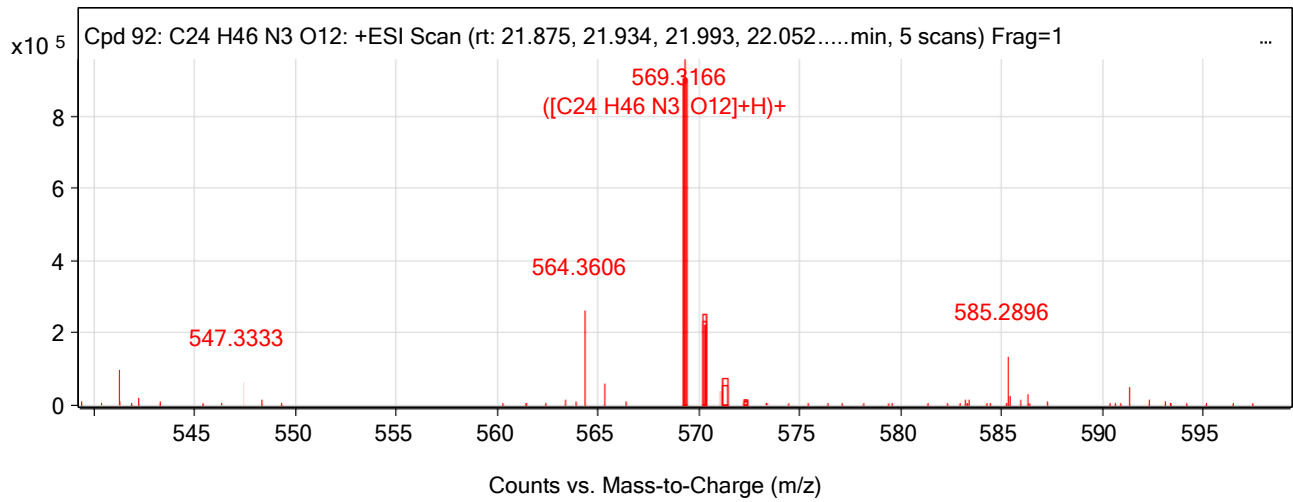

MS Spectrum Peak List

| m/z      | Calc m/z | Diff(ppm) | z | Abund     | Formula                                                        | Ion                |
|----------|----------|-----------|---|-----------|----------------------------------------------------------------|--------------------|
| 481.2634 |          |           | 1 | 489483.41 |                                                                |                    |
| 525.2904 |          |           | 1 | 781387.13 |                                                                |                    |
| 569.3166 | 569.3154 | -2.1      | 1 | 956116.19 | C <sub>24</sub> H <sub>46</sub> N <sub>3</sub> O <sub>12</sub> | (M+H) <sup>+</sup> |
| 570.3193 | 570.3186 | -1.2      | 1 | 221844.59 | C <sub>24</sub> H <sub>46</sub> N <sub>3</sub> O <sub>12</sub> | (M+H) <sup>+</sup> |
| 571.3214 | 571.3209 | -0.79     | 1 | 38110.2   | C <sub>24</sub> H <sub>46</sub> N <sub>3</sub> O <sub>12</sub> | (M+H) <sup>+</sup> |
| 572.324  | 572.3235 | -0.82     | 1 | 5196.88   | C <sub>24</sub> H <sub>46</sub> N <sub>3</sub> O <sub>12</sub> | (M+H) <sup>+</sup> |
| 608.387  |          |           | 1 | 273800.06 |                                                                |                    |
| 613.3432 |          |           | 1 | 834492.63 |                                                                |                    |
| 657.3692 |          |           | 1 | 612728.56 |                                                                |                    |
| 701.3952 |          |           | 1 | 360556.22 |                                                                |                    |

MSMS Spectrum

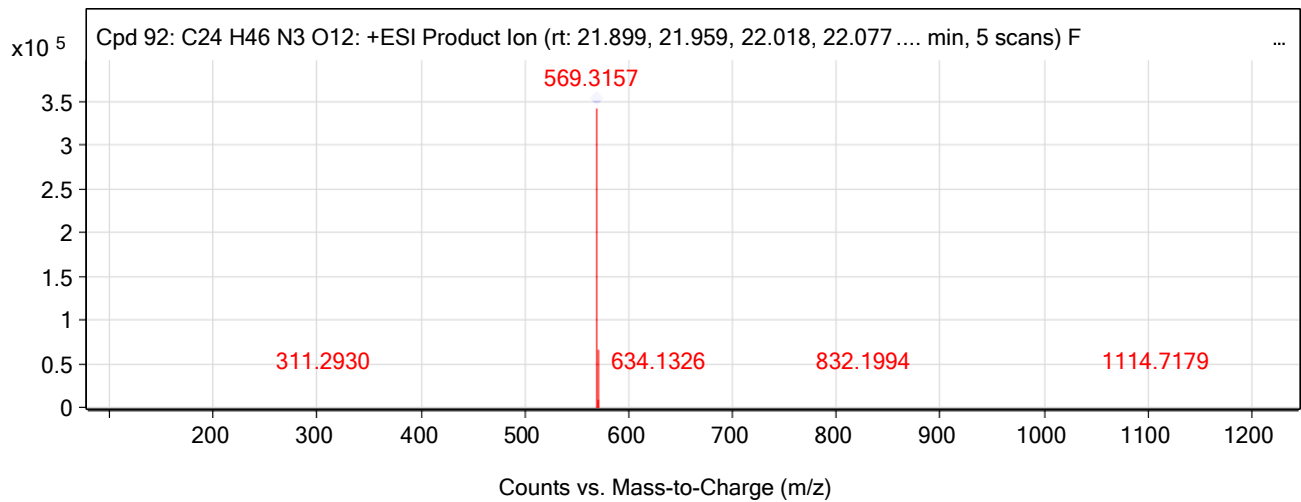

**MS/MS Spectrum Peak List**

| m/z      | Calc m/z | Diff(ppm)  | z | Abund     |
|----------|----------|------------|---|-----------|
| 107.0706 | 107.0689 | -15.76     |   | 15.48     |
| 133.0864 | 133.0859 | -3.8       |   | 67.99     |
| 221.1389 | 221.1384 | -2.39      |   | 21.3      |
| 283.2634 | 283.2632 | -0.76      |   | 21.59     |
| 309.2773 | 309.2775 | 0.69       |   | 16.59     |
| 311.293  | 311.2931 | 0.43       |   | 50.43     |
| 538.294  | 269.1482 | -499997.69 | 2 | 22.24     |
| 539.2932 |          |            | 2 | 19.45     |
| 566.2861 | 566.292  | 10.35      |   | 31.04     |
| 569.3157 | 569.3154 | -0.44      | 1 | 342000.69 |

| Compound Label      | m/z      | RT     | Algorithm  | Mass     |
|---------------------|----------|--------|------------|----------|
| Cpd 93: C28 H52 O14 | 613.3431 | 22.213 | Auto MS/MS | 612.3356 |

**Compound Chromatograms**

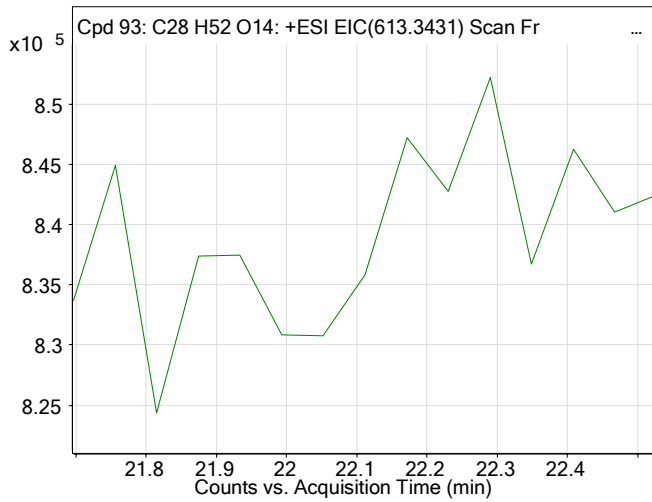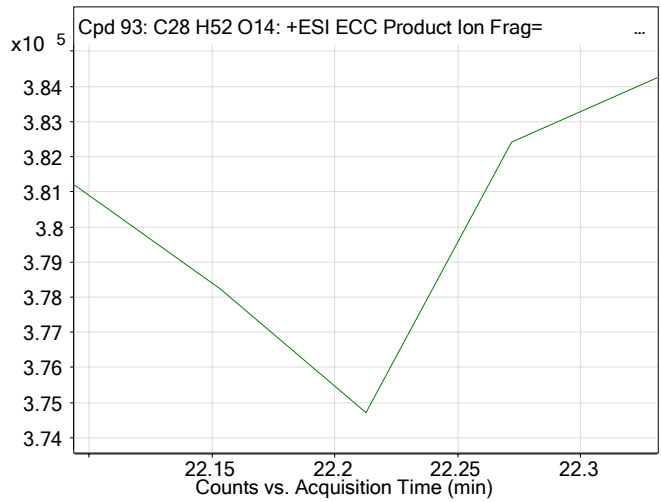

MS Spectrum

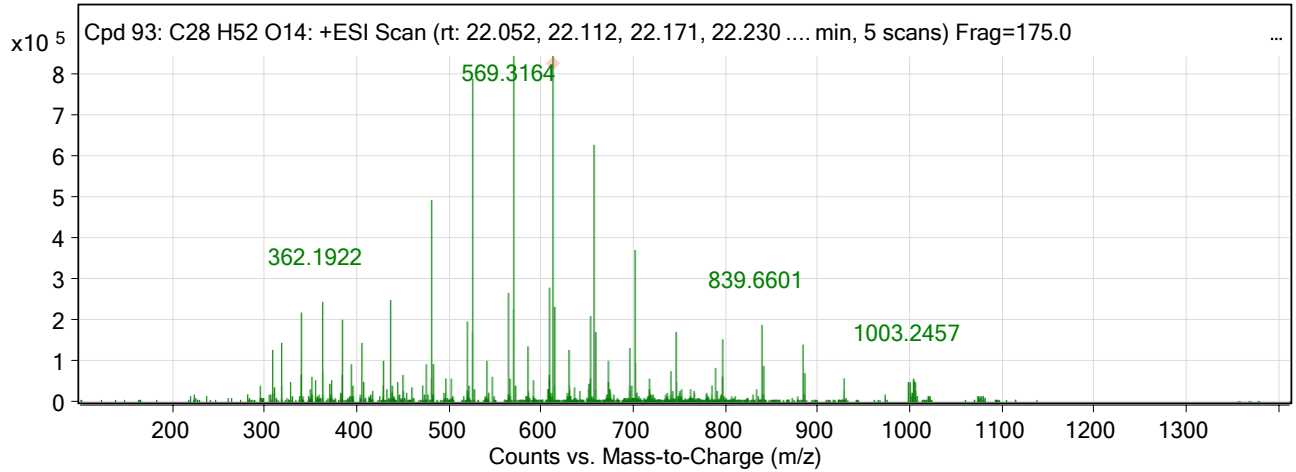

MS Zoomed Spectrum

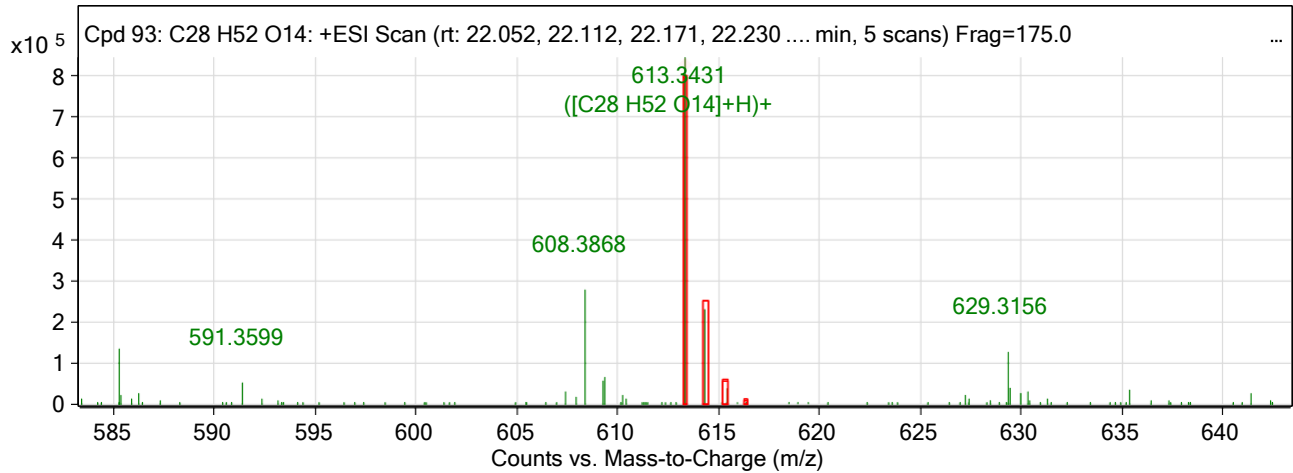

**MS Spectrum Peak List**

| m/z      | Calc m/z | Diff(ppm) | z | Abund     | Formula     | Ion    |
|----------|----------|-----------|---|-----------|-------------|--------|
| 481.2632 |          |           | 1 | 492512.5  |             |        |
| 525.2902 |          |           | 1 | 786330.5  |             |        |
| 569.3164 |          |           | 1 | 961577.81 |             |        |
| 608.3868 |          |           | 1 | 278985.5  |             |        |
| 613.3431 | 613.343  | -0.12     | 1 | 841771.38 | C28 H52 O14 | (M+H)+ |
| 614.3456 | 614.3464 | 1.32      | 1 | 228470.91 | C28 H52 O14 | (M+H)+ |
| 615.3474 | 615.3489 | 2.29      | 1 | 40553.1   | C28 H52 O14 | (M+H)+ |
| 616.3535 | 616.3515 | -3.2      | 1 | 5969.89   | C28 H52 O14 | (M+H)+ |
| 657.369  |          |           | 1 | 624067.44 |             |        |
| 701.395  |          |           | 1 | 366925.84 |             |        |

MSMS Spectrum

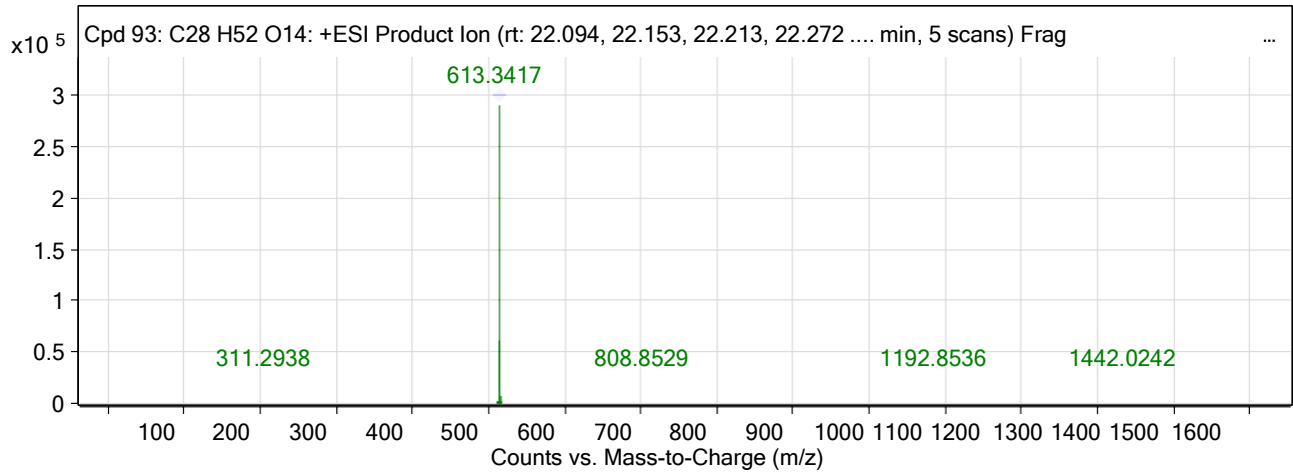

**MS/MS Spectrum Peak List**

| m/z      | Calc m/z | Diff(ppm) | z | Abund     |
|----------|----------|-----------|---|-----------|
| 133.0851 | 133.0859 | 6.06      |   | 53.17     |
| 309.2788 | 309.2788 | -0.06     | 1 | 46.9      |
| 612.3877 |          |           | 2 | 1962.45   |
| 612.6376 |          |           | 2 | 2428.47   |
| 612.8896 |          |           | 2 | 1866.38   |
| 613.1412 |          |           | 2 | 1092.05   |
| 613.3417 | 613.343  | 2.14      | 1 | 290183.84 |
| 614.3444 |          |           | 1 | 60950.44  |
| 615.3468 |          |           | 1 | 7448.76   |
| 615.4139 |          |           | 2 | 1115.01   |

| Compound Label      | m/z      | RT     | Algorithm  | Mass     |
|---------------------|----------|--------|------------|----------|
| Cpd 94: C26 H48 O13 | 569.3168 | 22.315 | Auto MS/MS | 568.3093 |

**Compound Chromatograms**

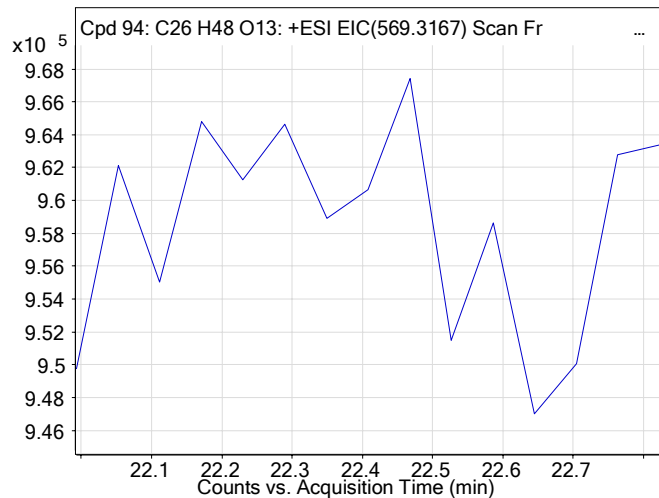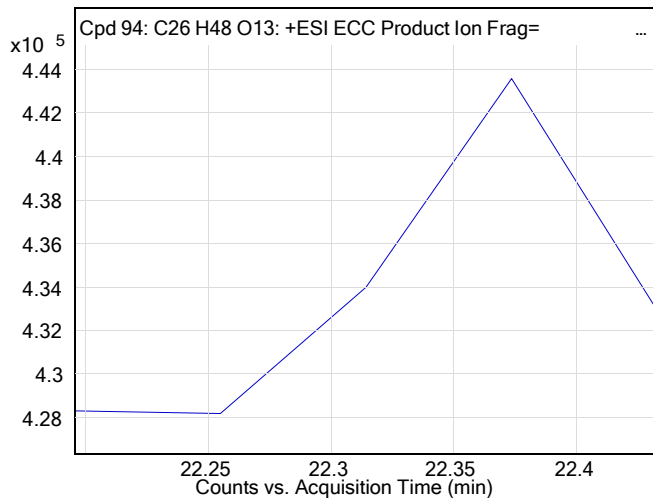

MS Spectrum

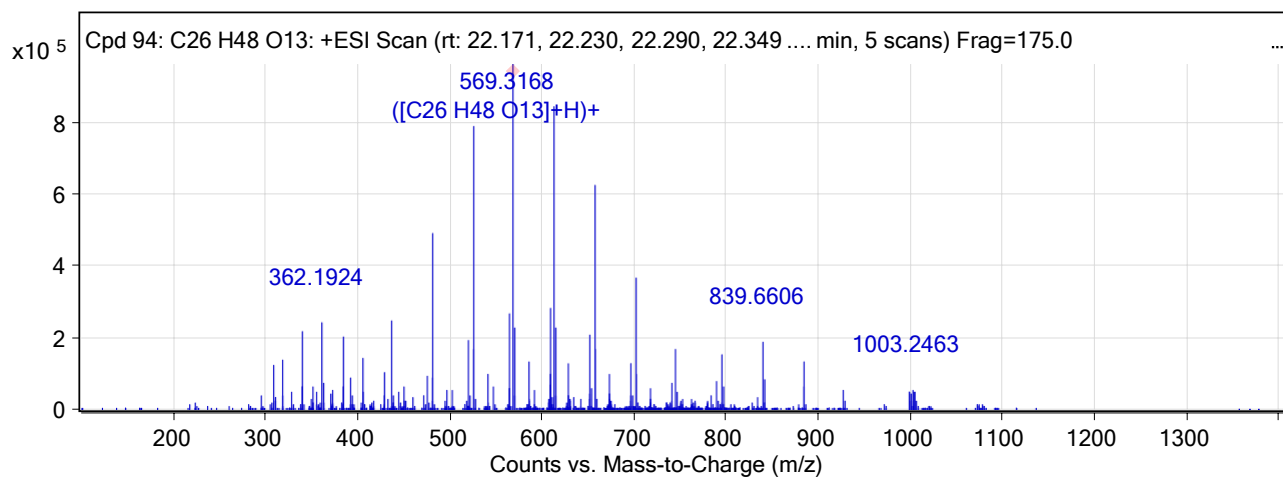

MS Zoomed Spectrum

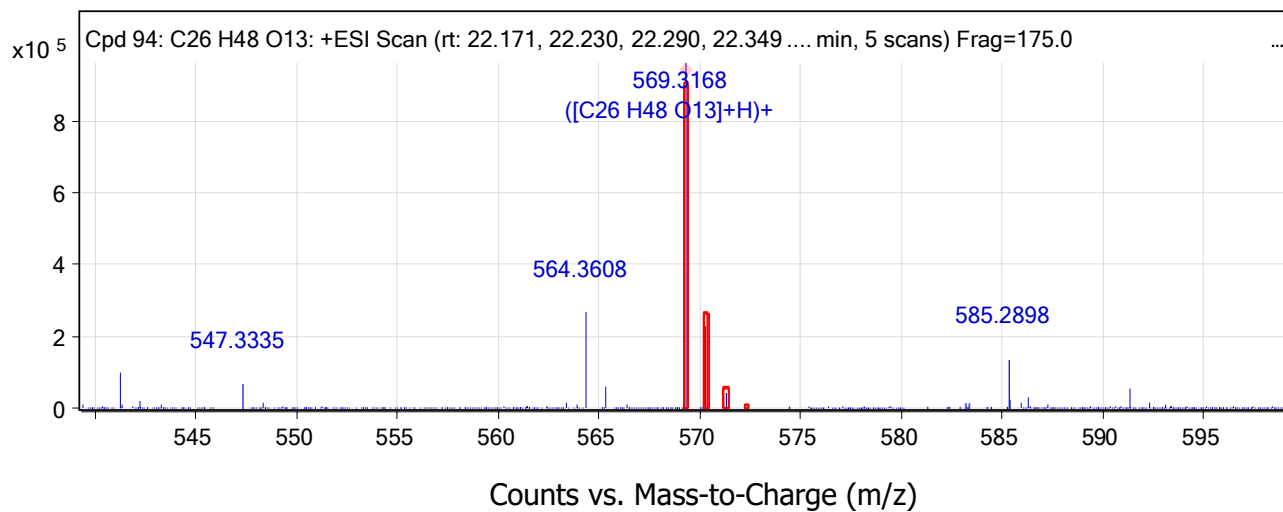

MS Spectrum Peak List

| m/z      | Calc m/z | Diff(ppm) | z | Abund     | Formula     | Ion    |
|----------|----------|-----------|---|-----------|-------------|--------|
| 481.2635 |          |           | 1 | 493414.44 |             |        |
| 525.2905 |          |           | 1 | 788289.56 |             |        |
| 569.3168 | 569.3168 | -0.06     | 1 | 962063.19 | C26 H48 O13 | (M+H)+ |
| 570.3195 | 570.3202 | 1.21      | 1 | 227453    | C26 H48 O13 | (M+H)+ |
| 571.3215 | 571.3226 | 1.95      | 1 | 38805.34  | C26 H48 O13 | (M+H)+ |
| 572.3244 | 572.3253 | 1.54      | 1 | 5585.56   | C26 H48 O13 | (M+H)+ |
| 608.3873 |          |           | 1 | 282260.56 |             |        |
| 613.3435 |          |           | 1 | 845043    |             |        |
| 657.3695 |          |           | 1 | 626398.5  |             |        |



MSMS Spectrum

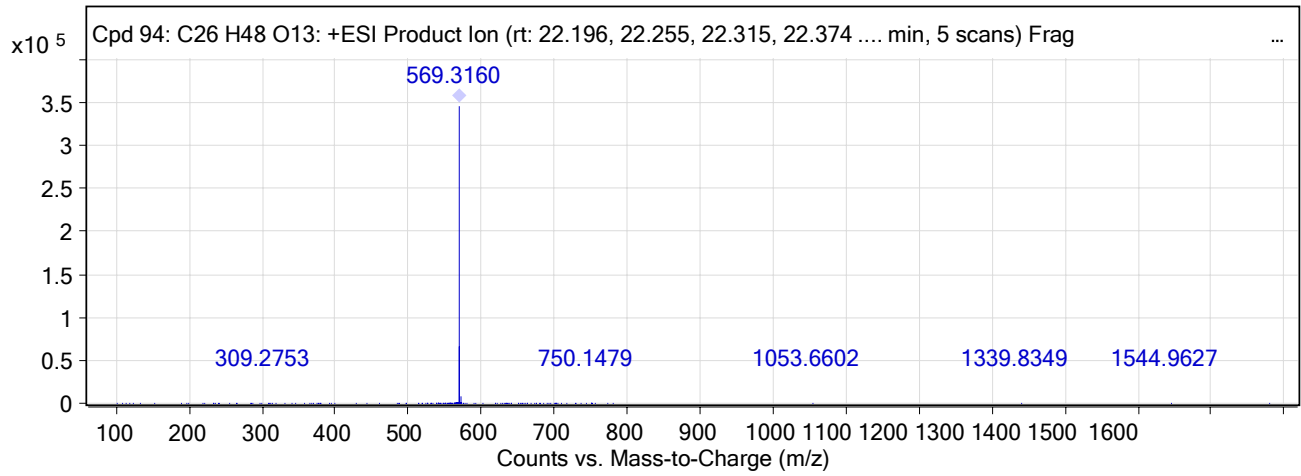

MS/MS Spectrum PeakList

| m/z      | Calc m/z | Diff(ppm) | z | Abund     |
|----------|----------|-----------|---|-----------|
| 101.096  | 101.0961 | 0.96      |   | 11.26     |
| 133.0855 | 133.0859 | 3.24      |   | 38.72     |
| 188.1027 | 188.1043 | 8.39      |   | 14.1      |
| 265.1639 | 265.1646 | 2.66      |   | 11.62     |
| 285.2009 | 285.206  | 18.01     |   | 11.55     |
| 309.2753 | 309.2788 | 11.43     |   | 32.25     |
| 311.2948 | 311.2945 | -1.14     | 1 | 27.74     |
| 318.24   | 318.2401 | 0.24      |   | 11.62     |
| 443.2661 | 443.2639 | -4.9      |   | 11.31     |
| 569.316  | 569.3168 | 1.39      | 1 | 346291.81 |

| Compound Label      | m/z      | RT     | Algorithm  | Mass     |
|---------------------|----------|--------|------------|----------|
| Cpd 95: C28 H52 O14 | 613.3434 | 22.509 | Auto MS/MS | 612.3359 |

Compound Chromatograms

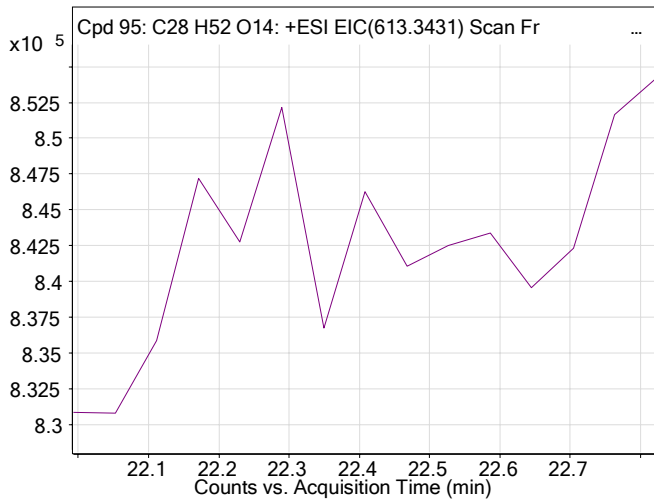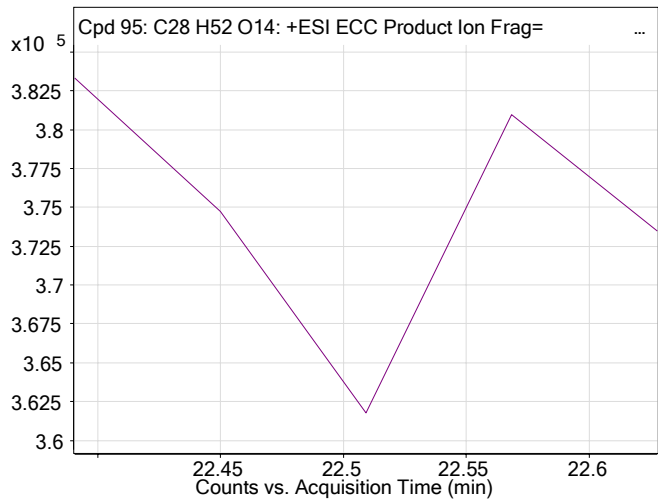

MS Spectrum

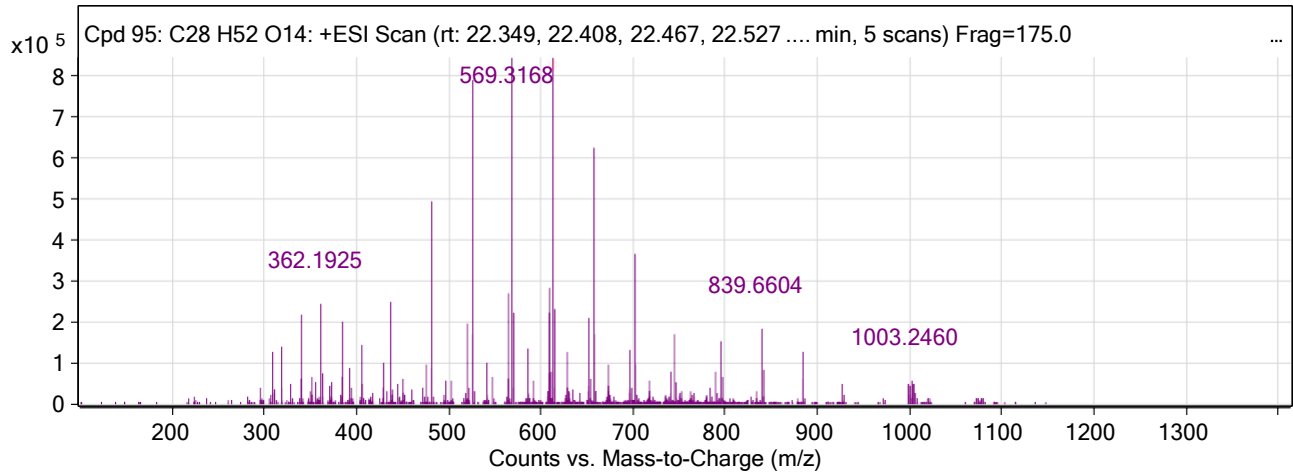

MS Zoomed Spectrum

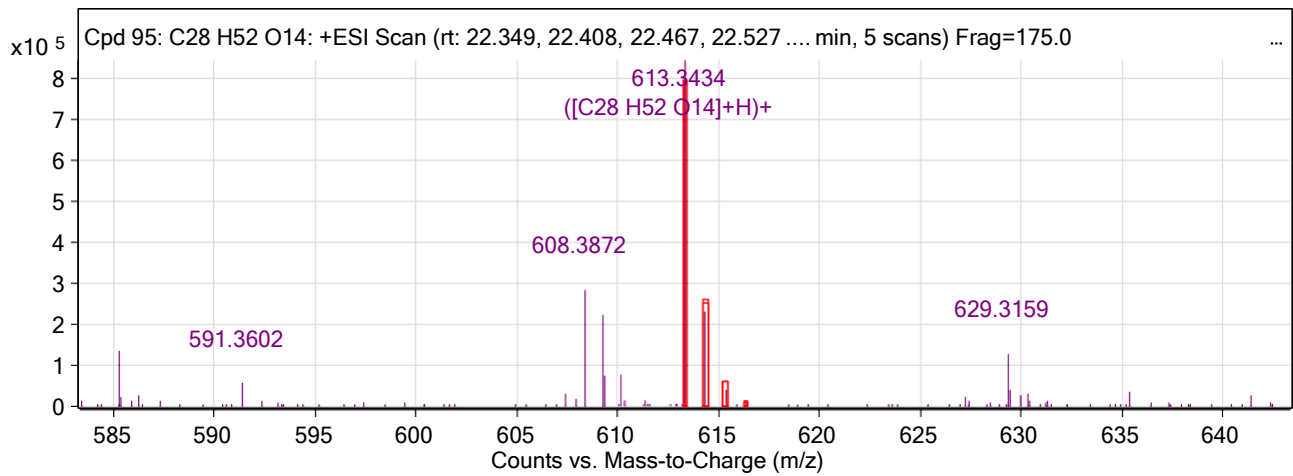

MS Spectrum Peak List

| m/z      | Calc m/z | Diff(ppm) | z | Abund     | Formula     | Ion    |
|----------|----------|-----------|---|-----------|-------------|--------|
| 481.2636 |          |           | 1 | 490970.91 |             |        |
| 525.2905 |          |           | 1 | 786835.38 |             |        |
| 569.3168 |          |           | 1 | 959434.88 |             |        |
| 608.3872 |          |           | 1 | 284346.44 |             |        |
| 613.3434 | 613.343  | -0.62     | 1 | 841986.88 | C28 H52 O14 | (M+H)+ |
| 614.3459 | 614.3464 | 0.87      | 1 | 228758.45 | C28 H52 O14 | (M+H)+ |
| 615.3478 | 615.3489 | 1.68      | 1 | 41237.84  | C28 H52 O14 | (M+H)+ |
| 616.3538 | 616.3515 | -3.71     | 1 | 5973.26   | C28 H52 O14 | (M+H)+ |
| 657.3694 |          |           | 1 | 619504.88 |             |        |
| 701.3954 |          |           | 1 | 366502.94 |             |        |

MSMS Spectrum

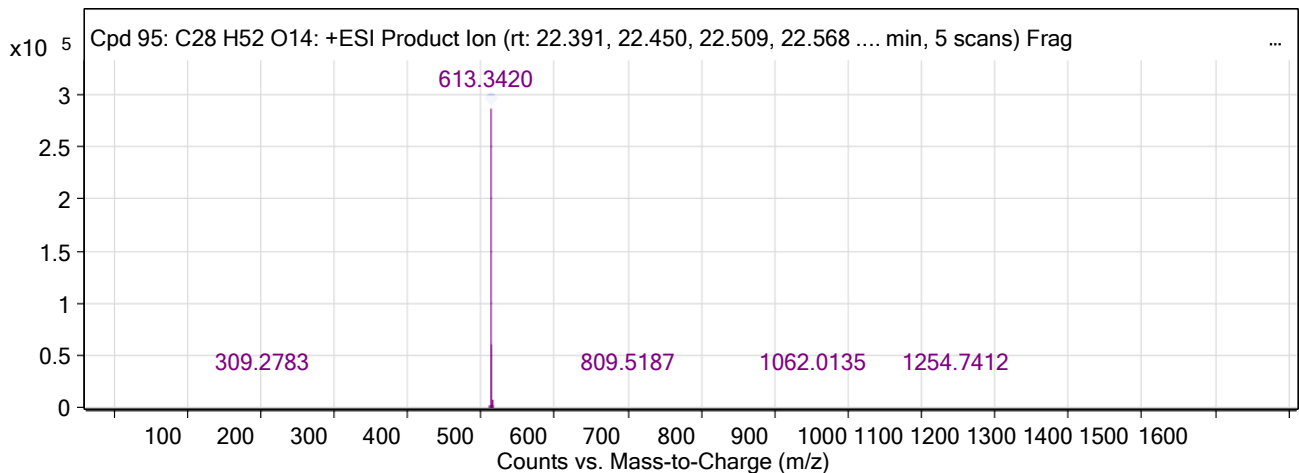

**MS/MS Spectrum Peak List**

| m/z      | Calc m/z | Diff(ppm) | z | Abund     |
|----------|----------|-----------|---|-----------|
| 117.0926 | 117.091  | -13.21    |   | 15.83     |
| 296.1526 | 296.1466 | -20.26    |   | 27.7      |
| 309.2783 | 309.2788 | 1.78      |   | 44.72     |
| 311.2954 | 311.2945 | -3.04     |   | 31.51     |
| 357.0705 | 357.0664 | -11.5     |   | 25.14     |
| 609.3142 | 304.6556 | -50002.55 | 2 | 55.48     |
| 612.3396 | 612.3352 | -7.24     |   | 45.62     |
| 613.342  | 613.343  | 1.57      | 1 | 286754.16 |
| 614.3447 |          |           | 1 | 59750.12  |
| 615.347  |          |           | 1 | 7428.98   |

| Compound Label         | m/z      | RT     | Algorithm  | Mass     |
|------------------------|----------|--------|------------|----------|
| Cpd 96: C24 H46 N3 O12 | 569.3165 | 22.611 | Auto MS/MS | 568.3091 |

**Compound Chromatograms**

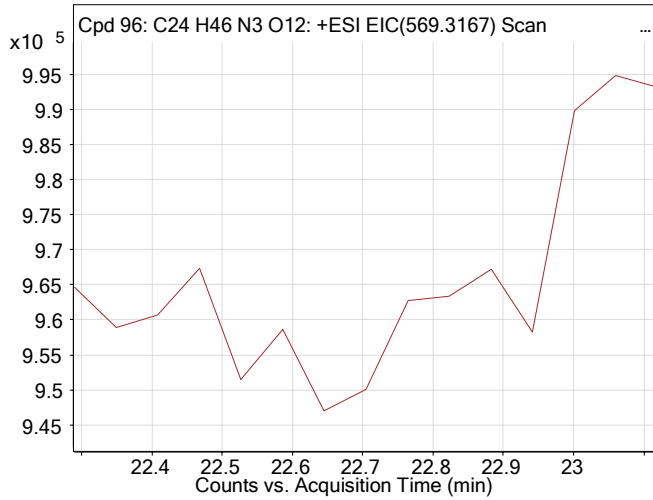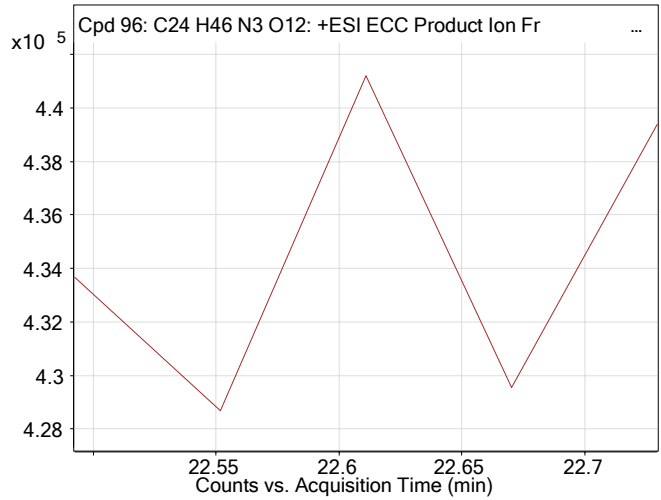

MS Spectrum

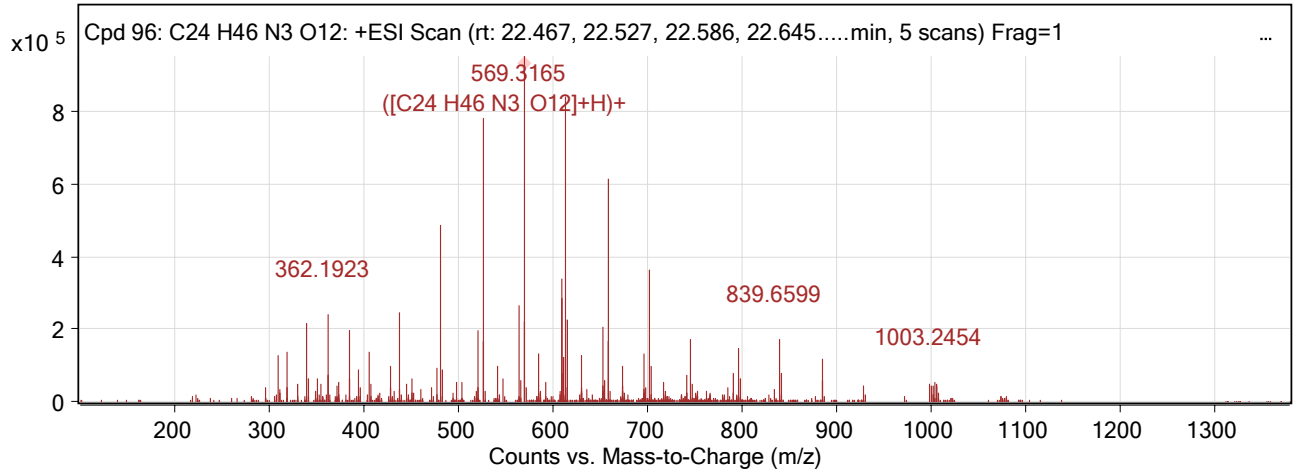

MS Zoomed Spectrum

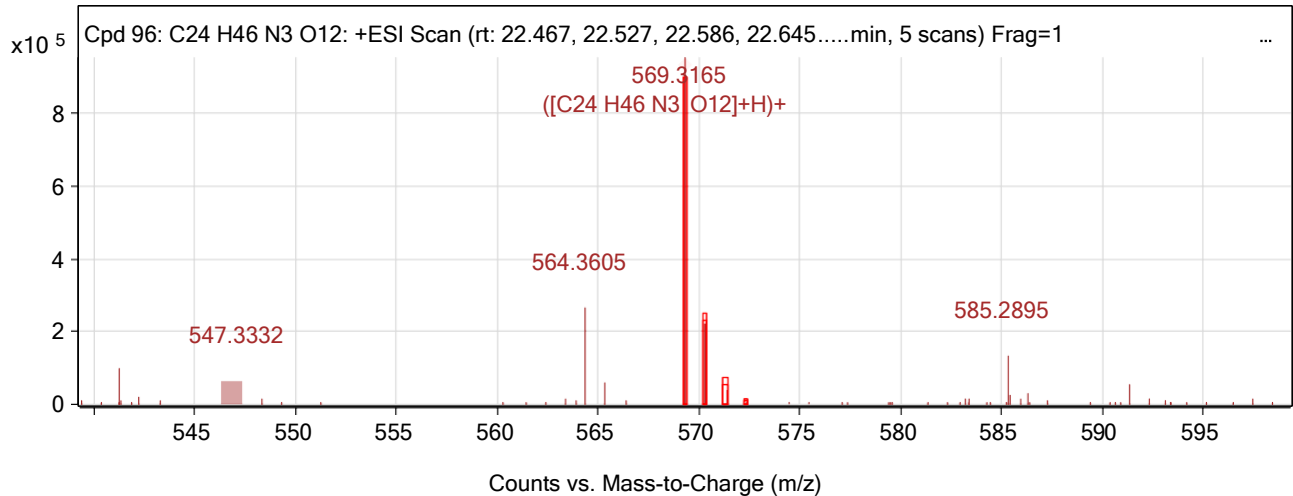

**MS Spectrum Peak List**

| m/z      | Calc m/z | Diff(ppm) | z | Abund     | Formula                                                        | Ion                |
|----------|----------|-----------|---|-----------|----------------------------------------------------------------|--------------------|
| 481.2633 |          |           | 1 | 487133.31 |                                                                |                    |
| 525.2902 |          |           | 1 | 782508.81 |                                                                |                    |
| 569.3165 | 569.3154 | -1.87     | 1 | 954932    | C <sub>24</sub> H <sub>46</sub> N <sub>3</sub> O <sub>12</sub> | (M+H) <sup>+</sup> |
| 570.3192 | 570.3186 | -0.97     | 1 | 221608.91 | C <sub>24</sub> H <sub>46</sub> N <sub>3</sub> O <sub>12</sub> | (M+H) <sup>+</sup> |
| 571.3213 | 571.3209 | -0.54     | 1 | 38150.71  | C <sub>24</sub> H <sub>46</sub> N <sub>3</sub> O <sub>12</sub> | (M+H) <sup>+</sup> |
| 572.3239 | 572.3235 | -0.73     | 1 | 5204.28   | C <sub>24</sub> H <sub>46</sub> N <sub>3</sub> O <sub>12</sub> | (M+H) <sup>+</sup> |
| 609.2725 |          |           | 1 | 342275.94 |                                                                |                    |
| 613.343  |          |           | 1 | 841752.31 |                                                                |                    |
| 657.369  |          |           | 1 | 617424.5  |                                                                |                    |
| 701.395  |          |           | 1 | 366533.5  |                                                                |                    |

MSMS Spectrum

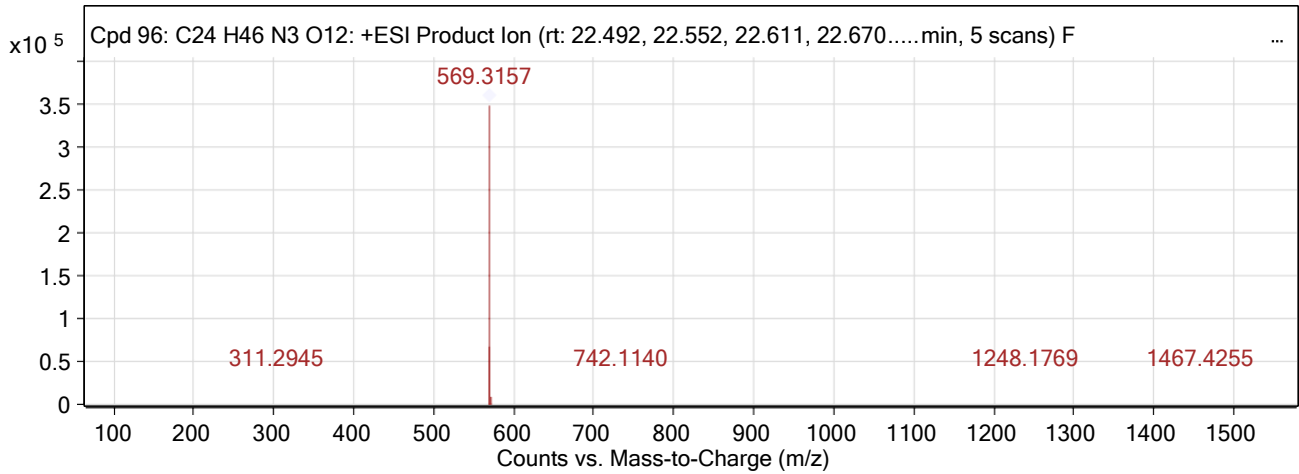

**MS/MS Spectrum Peak List**

| m/z      | Calc m/z | Diff(ppm) | z | Abund     |
|----------|----------|-----------|---|-----------|
| 133.0849 | 133.0846 | -2.34     |   | 25.78     |
| 151.0974 | 151.0992 | 11.73     |   | 22.42     |
| 195.1217 | 195.1214 | -1.81     |   | 18.37     |
| 309.2779 | 309.2775 | -1.29     |   | 32.25     |
| 311.2945 | 311.2945 | -0.22     |   | 52.8      |
| 568.3619 |          |           | 2 | 740.84    |
| 568.6119 |          |           | 2 | 640.99    |
| 569.3157 | 569.3154 | -0.41     | 1 | 348047.66 |
| 570.3183 |          |           | 1 | 67213.73  |
| 571.3205 |          |           | 1 | 8028.4    |

| Compound Label                                          | m/z      | RT     | Algorithm  | Mass     |
|---------------------------------------------------------|----------|--------|------------|----------|
| Cpd 97: C <sub>28</sub> H <sub>52</sub> O <sub>14</sub> | 613.3429 | 22.806 | Auto MS/MS | 612.3354 |

**Compound Chromatograms**

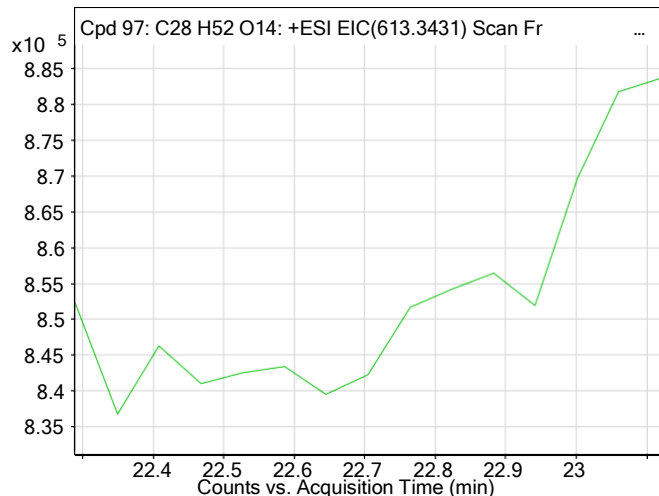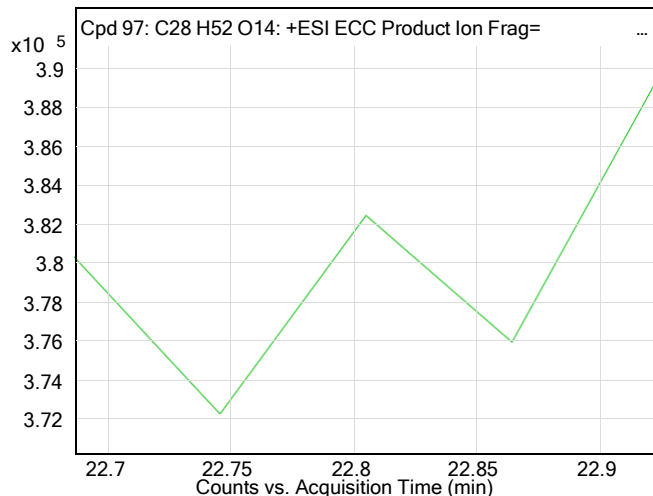

MS Spectrum

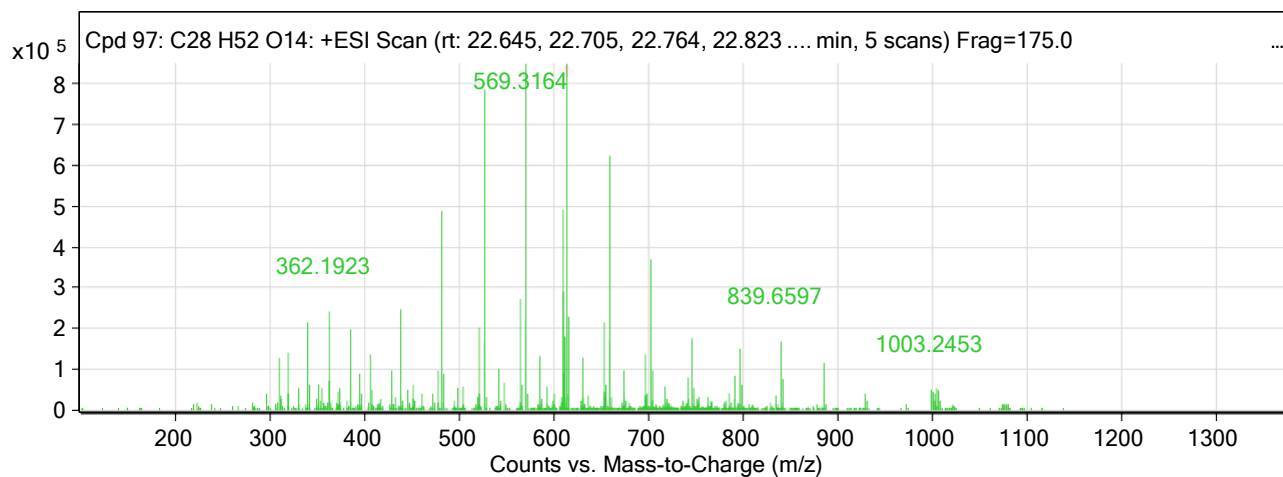

MS Zoomed Spectrum

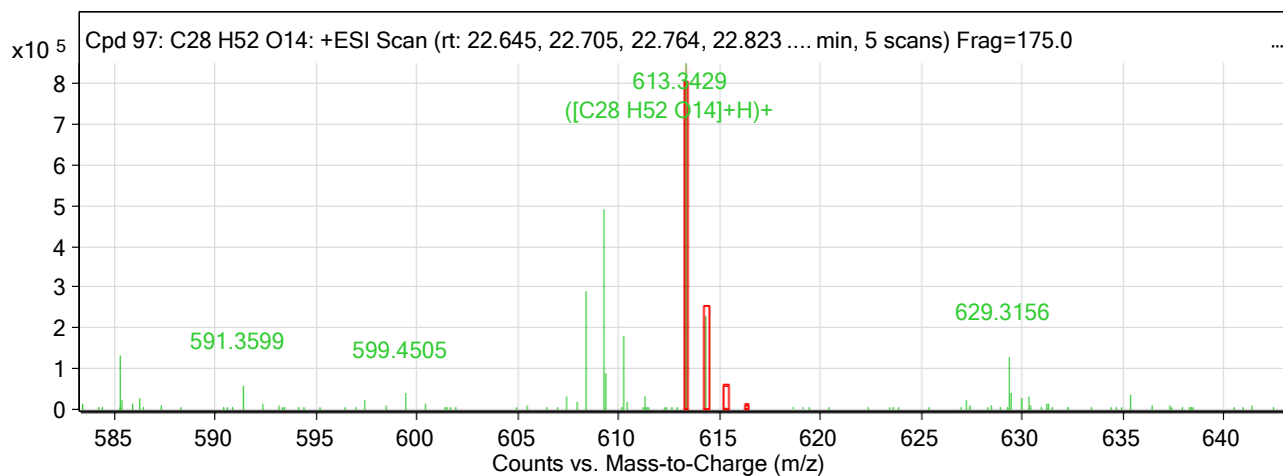

MS Spectrum Peak List

| m/z      | Calc m/z | Diff(ppm) | z | Abund     | Formula     | Ion    |
|----------|----------|-----------|---|-----------|-------------|--------|
| 481.2632 |          |           | 1 | 485446.81 |             |        |
| 525.2902 |          |           | 1 | 784033.25 |             |        |
| 569.3164 |          |           | 1 | 958102.31 |             |        |
| 609.2725 |          |           | 1 | 488988.25 |             |        |
| 613.3429 | 613.343  | 0.11      | 1 | 848836    | C28 H52 O14 | (M+H)+ |
| 614.3454 | 614.3464 | 1.63      | 1 | 229507.75 | C28 H52 O14 | (M+H)+ |
| 615.3474 | 615.3489 | 2.38      | 1 | 41096.92  | C28 H52 O14 | (M+H)+ |
| 616.3546 | 616.3515 | -5.03     | 1 | 5609.77   | C28 H52 O14 | (M+H)+ |
| 657.369  |          |           | 1 | 621833.5  |             |        |

MSMS Spectrum

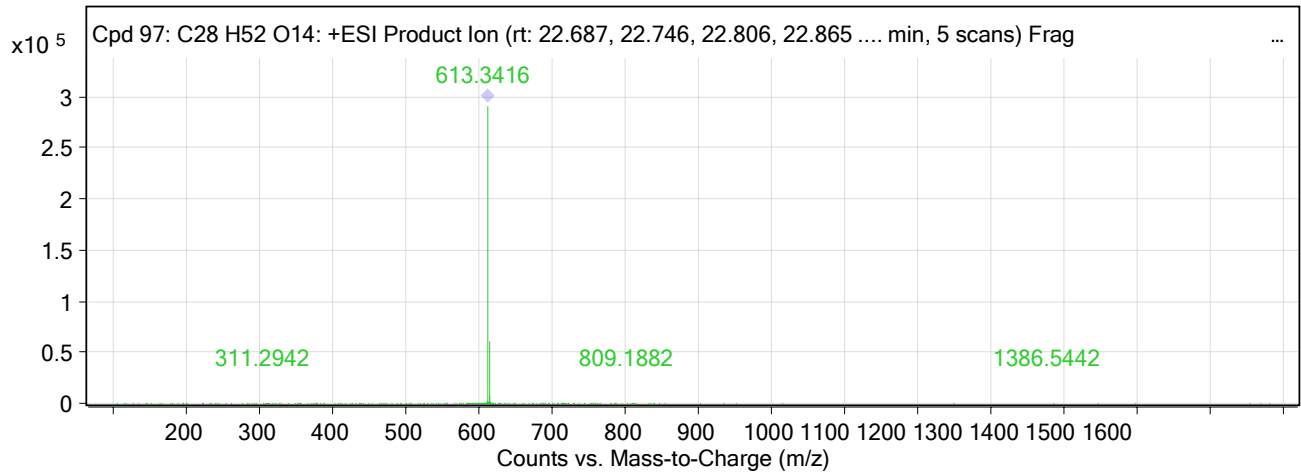

MS/MS Spectrum Peak List

| m/z      | Calc m/z | Diff(ppm) | z | Abund    |
|----------|----------|-----------|---|----------|
| 133.0864 | 133.0859 | -3.41     |   | 22.74    |
| 309.2791 | 309.2788 | -0.96     | 1 | 56.34    |
| 357.0683 | 357.0664 | -5.43     |   | 23.23    |
| 612.3871 |          |           | 2 | 1844.39  |
| 612.6385 |          |           | 2 | 2283.4   |
| 612.8883 |          |           | 2 | 1780.79  |
| 613.3416 | 613.343  | 2.28      | 1 | 2911.27  |
| 614.3444 |          |           | 1 | 60440.22 |
| 615.3468 |          |           | 1 | 7321.81  |
| 615.417  |          |           | 2 | 1338.46  |

| Compound Label         | m/z      | RT     | Algorithm  | Mass     |
|------------------------|----------|--------|------------|----------|
| Cpd 98: C24 H46 N3 O12 | 569.3164 | 22.907 | Auto MS/MS | 568.3091 |

Compound Chromatograms

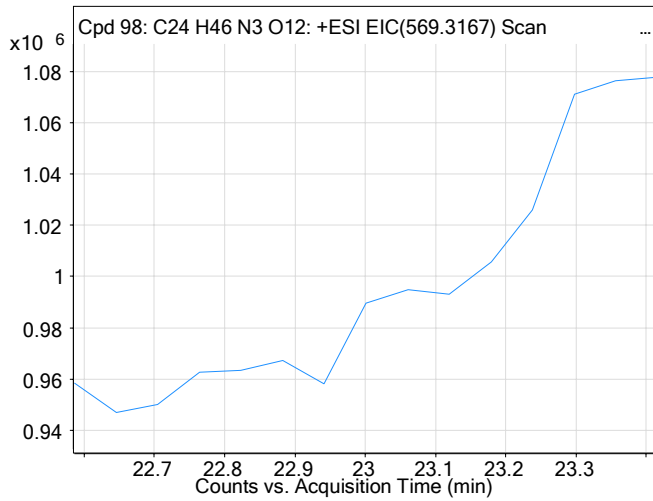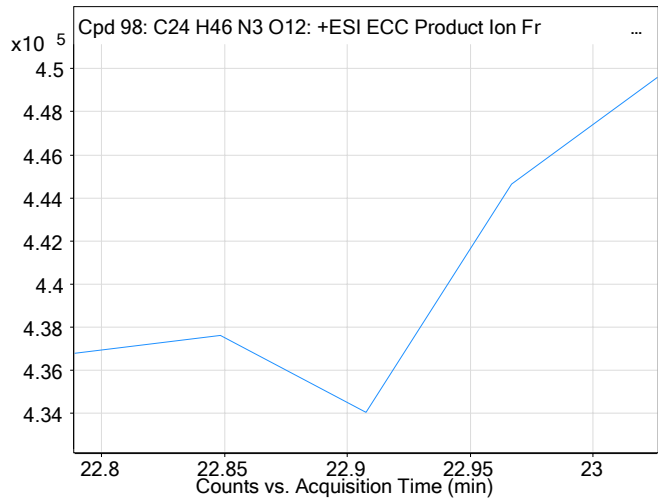

MS Spectrum

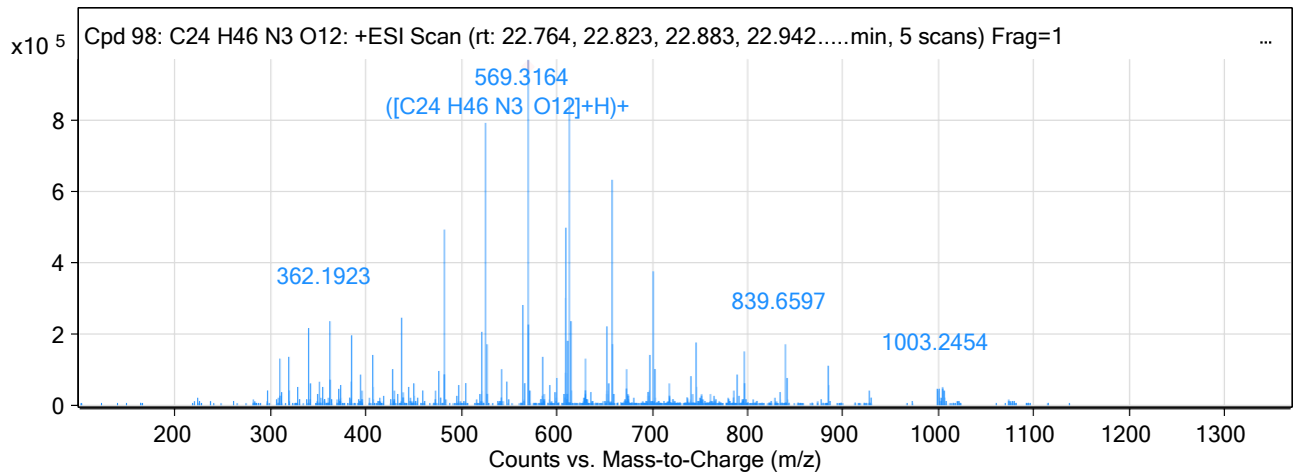

MS Zoomed Spectrum

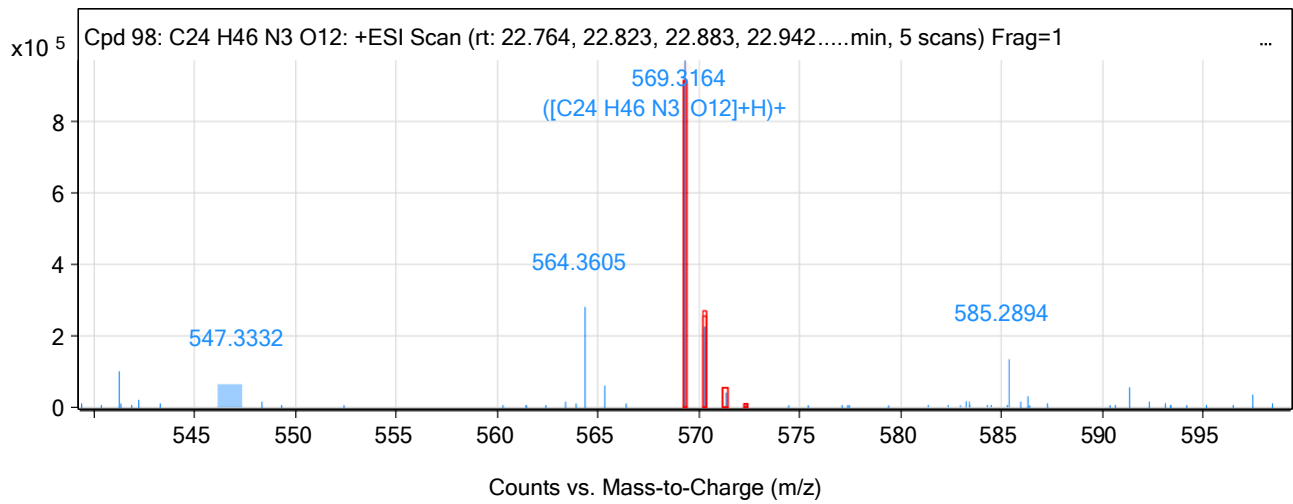

MS Spectrum Peak List

| m/z      | Calc m/z | Diff(ppm) | z | Abund     | Formula                                                        | Ion                |
|----------|----------|-----------|---|-----------|----------------------------------------------------------------|--------------------|
| 481.2633 |          |           | 1 | 488323.66 |                                                                |                    |
| 525.2902 |          |           | 1 | 790957.81 |                                                                |                    |
| 569.3164 | 569.3154 | -1.79     | 1 | 968311.81 | C <sub>24</sub> H <sub>46</sub> N <sub>3</sub> O <sub>12</sub> | (M+H) <sup>+</sup> |
| 570.3192 | 570.3186 | -0.97     | 1 | 226846.58 | C <sub>24</sub> H <sub>46</sub> N <sub>3</sub> O <sub>12</sub> | (M+H) <sup>+</sup> |
| 571.3212 | 571.3209 | -0.46     | 1 | 38698.39  | C <sub>24</sub> H <sub>46</sub> N <sub>3</sub> O <sub>12</sub> | (M+H) <sup>+</sup> |
| 572.3239 | 572.3235 | -0.66     | 1 | 5489.7    | C <sub>24</sub> H <sub>46</sub> N <sub>3</sub> O <sub>12</sub> | (M+H) <sup>+</sup> |
| 609.2726 |          |           | 1 | 492113.16 |                                                                |                    |
| 613.3429 |          |           | 1 | 856787.19 |                                                                |                    |
| 657.369  |          |           | 1 | 627767    |                                                                |                    |
| 701.395  |          |           | 1 | 373394.44 |                                                                |                    |

MSMS Spectrum

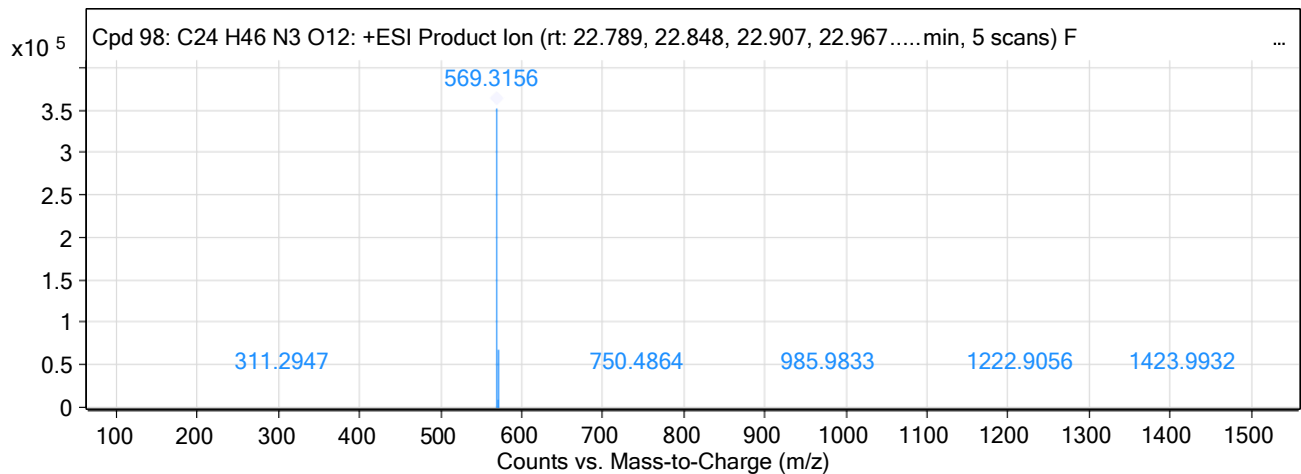

**MS/MS Spectrum Peak List**

| m/z      | Calc m/z | Diff(ppm)  | z | Abund     |
|----------|----------|------------|---|-----------|
| 133.0869 | 133.0859 | -7.72      | 2 | 38.63     |
| 195.1227 | 195.1214 | -7.04      | 2 | 32.82     |
| 311.2947 | 311.2945 | -0.73      | 2 | 71.95     |
| 566.2843 | 283.1457 | -499993.74 | 2 | 42.4      |
| 568.3611 |          |            | 2 | 789.61    |
| 568.6114 |          |            | 2 | 735.24    |
| 568.8625 |          |            | 2 | 737.53    |
| 569.3156 | 569.3154 | -0.23      | 1 | 351660.06 |
| 570.3181 |          |            | 1 | 68387     |
| 571.3207 |          |            | 1 | 8418.54   |

| Compound Label      | m/z      | RT     | Algorithm  | Mass     |
|---------------------|----------|--------|------------|----------|
| Cpd 99: C28 H52 O14 | 613.3431 | 23.102 | Auto MS/MS | 612.3356 |

**Compound Chromatograms**

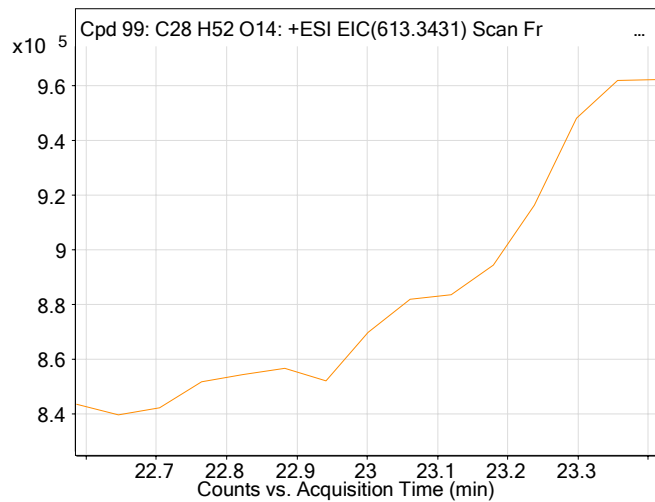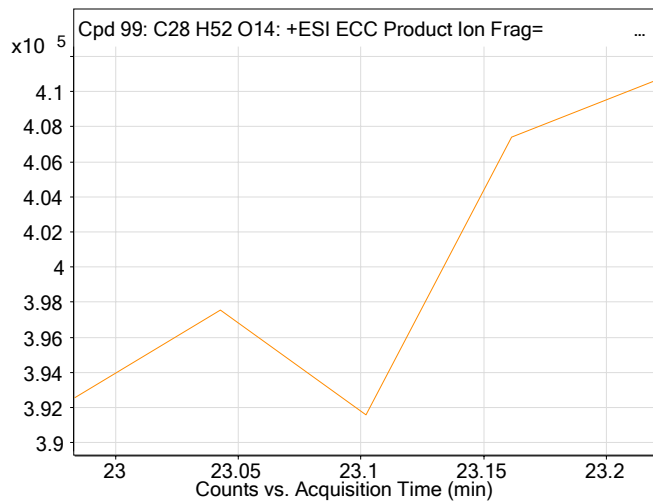

MS Spectrum

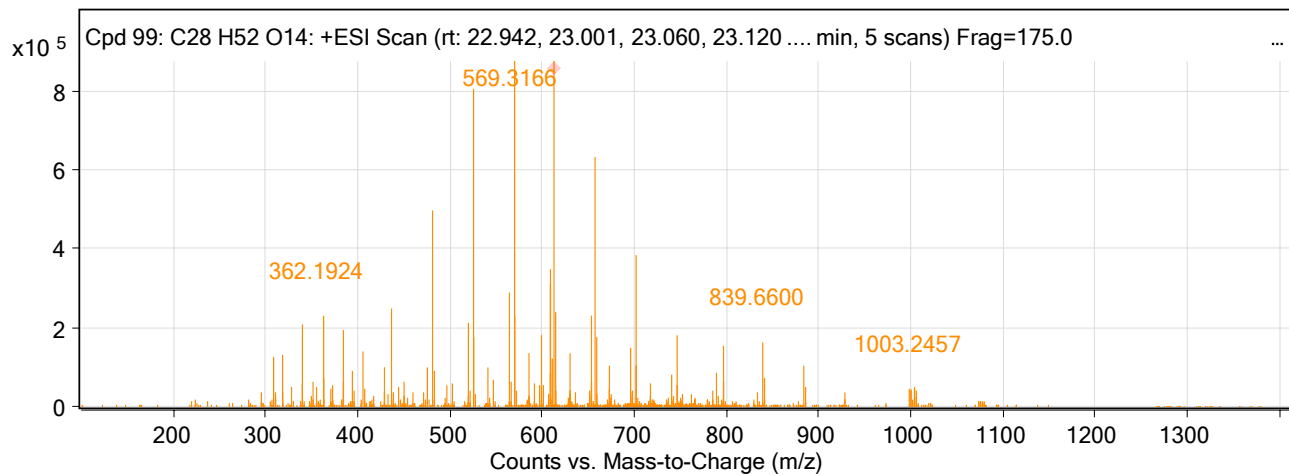

MS Zoomed Spectrum



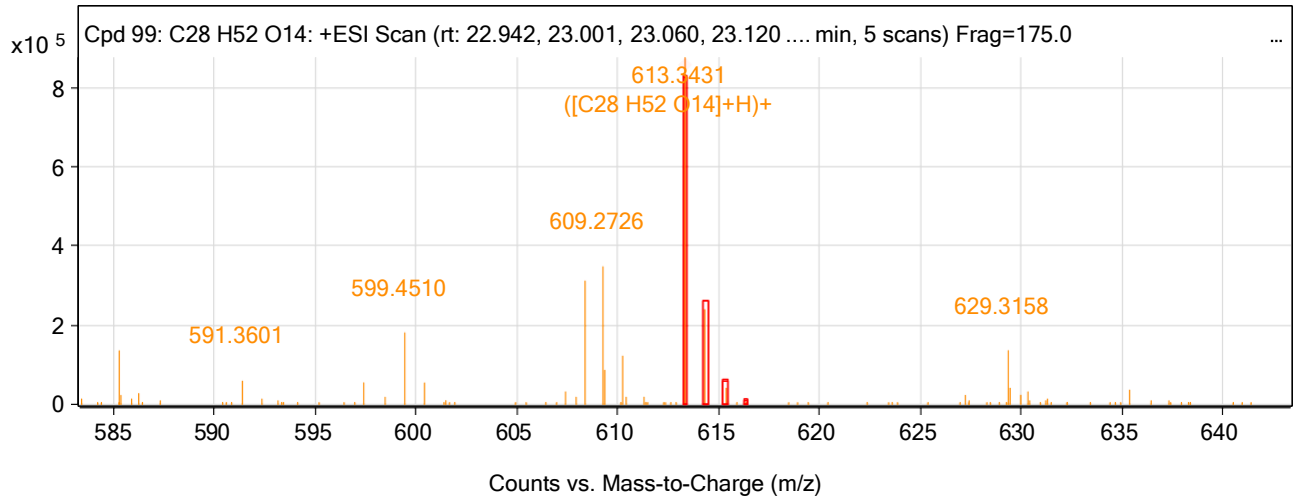

**MS Spectrum Peak List**

| m/z      | Calc m/z | Diff(ppm) | z | Abund     | Formula     | Ion    |
|----------|----------|-----------|---|-----------|-------------|--------|
| 481.2634 |          |           | 1 | 496112.75 |             |        |
| 525.2904 |          |           | 1 | 805220.19 |             |        |
| 569.3166 |          |           | 1 | 988407    |             |        |
| 609.2726 |          |           | 1 | 346863.41 |             |        |
| 613.3431 | 613.343  | -0.26     | 1 | 876264.69 | C28 H52 O14 | (M+H)+ |
| 614.3457 | 614.3464 | 1.17      | 1 | 238717.63 | C28 H52 O14 | (M+H)+ |
| 615.3478 | 615.3489 | 1.8       | 1 | 42226.77  | C28 H52 O14 | (M+H)+ |
| 616.3527 | 616.3515 | -1.92     | 1 | 5883.56   | C28 H52 O14 | (M+H)+ |
| 657.3693 |          |           | 1 | 631444.63 |             |        |
| 701.3952 |          |           | 1 | 383830.31 |             |        |

MSMS Spectrum

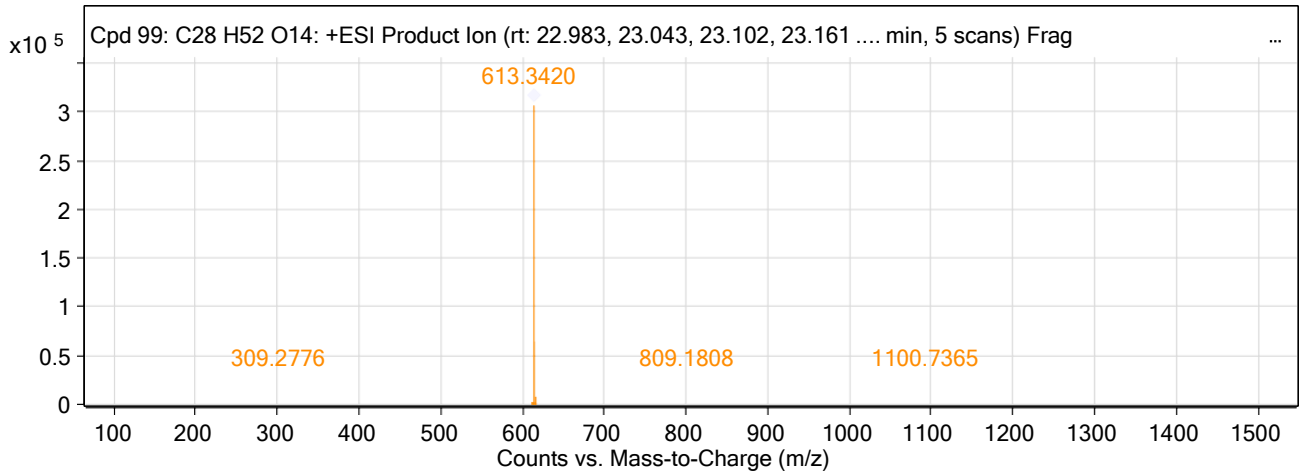

**MS/MS Spectrum Peak List**

| m/z      | Calc m/z | Diff(ppm) | z | Abund     |
|----------|----------|-----------|---|-----------|
| 133.0862 | 133.0859 | -2.24     |   | 46.74     |
| 177.1127 | 177.1121 | -3.05     |   | 18.88     |
| 283.2635 | 283.2632 | -1.23     |   | 28.6      |
| 309.2776 | 309.2788 | 3.77      | 1 | 97.84     |
| 612.6382 |          |           | 2 | 2177.19   |
| 612.8897 |          |           | 2 | 1749.86   |
| 613.342  | 613.343  | 1.62      | 1 | 306716.06 |
| 614.3447 |          |           | 1 | 63915.05  |
| 615.347  |          |           | 1 | 7511.7    |
| 615.42   |          |           | 2 | 2216.45   |

| Compound Label          | m/z      | RT     | Algorithm  | Mass     |
|-------------------------|----------|--------|------------|----------|
| Cpd 100: C24 H46 N3 O12 | 569.3166 | 23.204 | Auto MS/MS | 568.3092 |

Compound Chromatograms

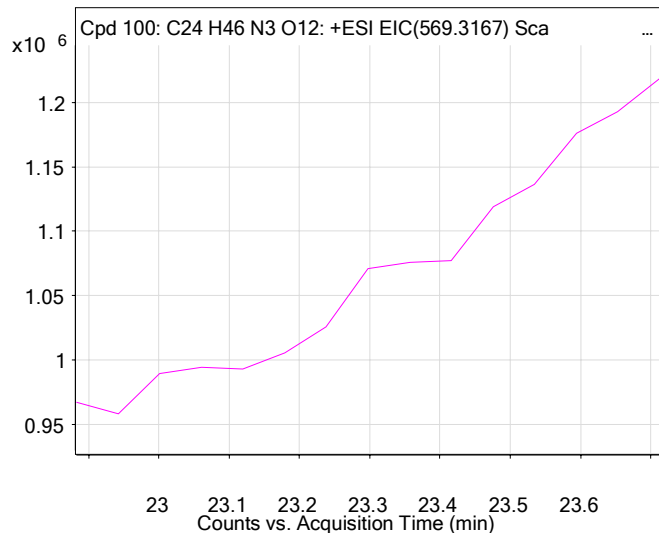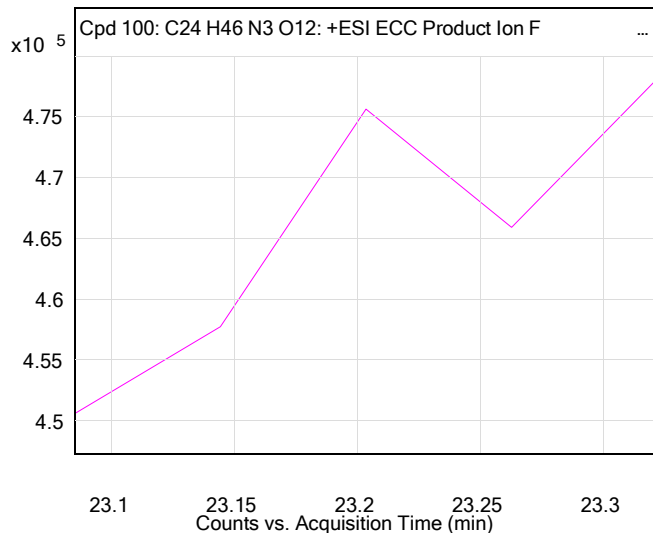

MS Spectrum

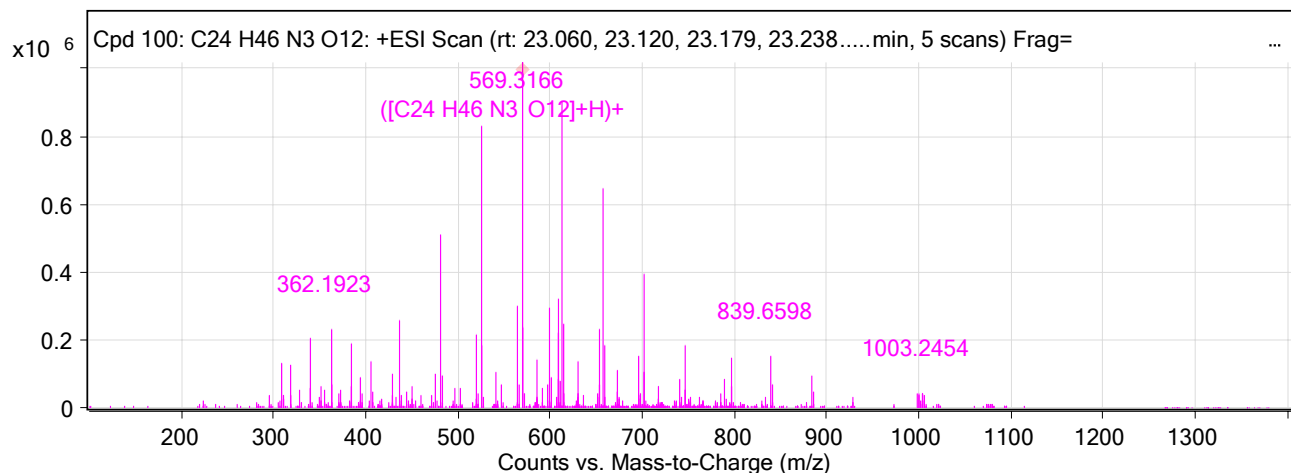

MS Zoomed Spectrum

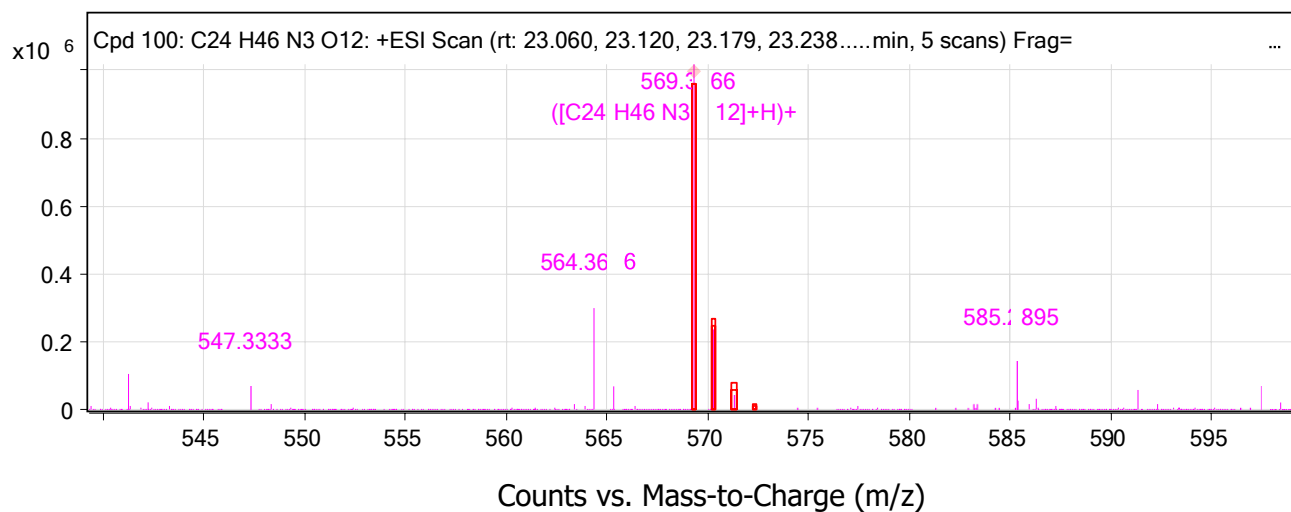

MS Spectrum Peak List

| m/z      | Calc m/z | Diff(ppm) | z | Abund      | Formula                                                        | Ion                |
|----------|----------|-----------|---|------------|----------------------------------------------------------------|--------------------|
| 481.2634 |          |           | 1 | 511095.25  |                                                                |                    |
| 525.2903 |          |           | 1 | 827998.94  |                                                                |                    |
| 569.3166 | 569.3154 | -1.98     | 1 | 1018169.81 | C <sub>24</sub> H <sub>46</sub> N <sub>3</sub> O <sub>12</sub> | (M+H) <sup>+</sup> |
| 570.3192 | 570.3186 | -1.05     | 1 | 235847.03  | C <sub>24</sub> H <sub>46</sub> N <sub>3</sub> O <sub>12</sub> | (M+H) <sup>+</sup> |
| 571.3213 | 571.3209 | -0.66     | 1 | 40767.01   | C <sub>24</sub> H <sub>46</sub> N <sub>3</sub> O <sub>12</sub> | (M+H) <sup>+</sup> |
| 572.324  | 572.3235 | -0.85     | 1 | 5589.57    | C <sub>24</sub> H <sub>46</sub> N <sub>3</sub> O <sub>12</sub> | (M+H) <sup>+</sup> |
| 608.387  |          |           | 1 | 318837.56  |                                                                |                    |

MSMS Spectrum

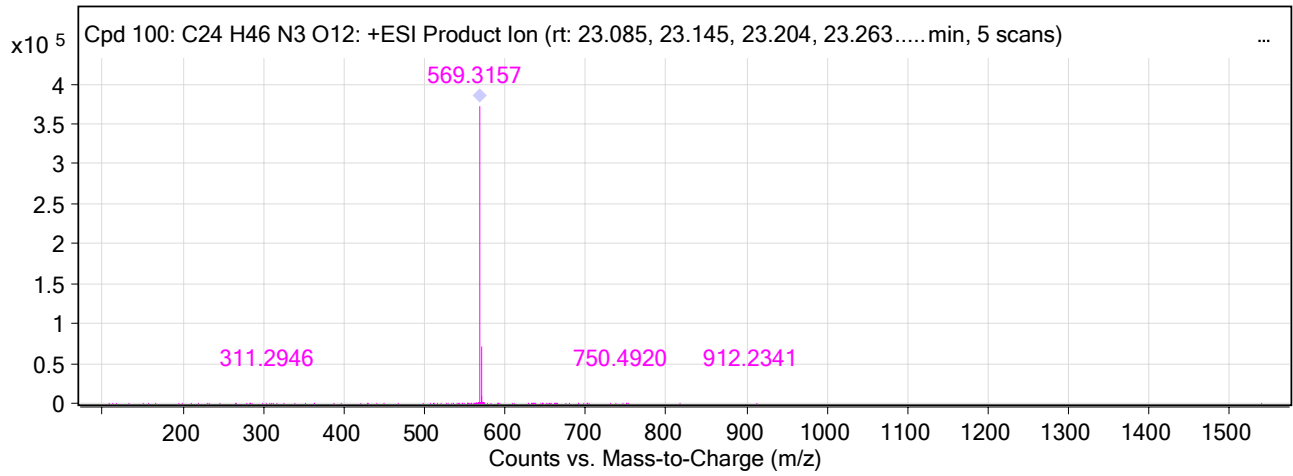

MS/MS Spectrum PeakList

| m/z      | Calc m/z | Diff(ppm) | z | Abund     |
|----------|----------|-----------|---|-----------|
| 133.0857 | 133.0859 | 1.53      |   | 25.66     |
| 232.1283 | 232.1292 | 3.79      |   | 21.99     |
| 283.1766 | 283.1778 | 4.25      |   | 15.16     |
| 283.2627 | 283.2632 | 1.68      |   | 21.41     |
| 307.2219 | 307.2227 | 2.9       |   | 13.14     |
| 309.2801 | 309.2788 | -4.26     |   | 30.51     |
| 311.2946 | 311.2945 | -0.38     |   | 54.59     |
| 337.2355 | 337.236  | 1.34      |   | 17.16     |
| 569.3157 | 569.3154 | -0.5      | 1 | 372855.81 |
| 570.3183 |          |           | 1 | 72597.39  |

| Compound Label       | m/z      | RT     | Algorithm  | Mass     |
|----------------------|----------|--------|------------|----------|
| Cpd 101: C28 H52 O14 | 613.3432 | 23.398 | Auto MS/MS | 612.3357 |

Compound Chromatograms

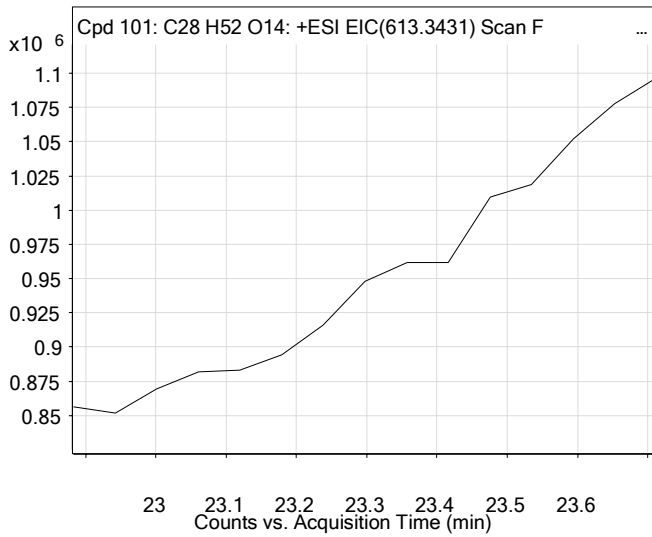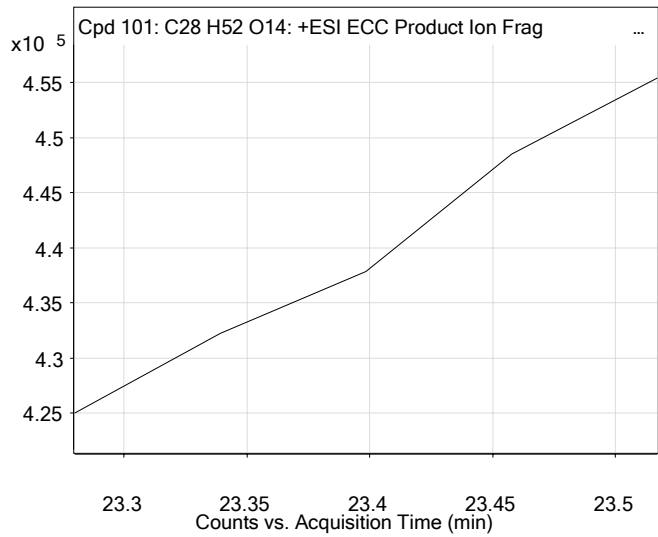

MS Spectrum

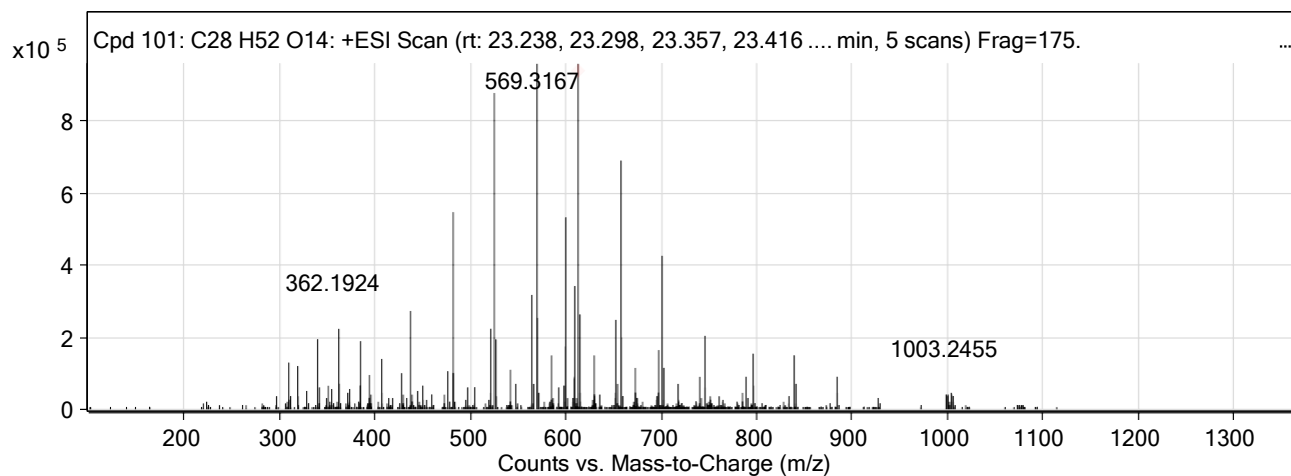

MS Zoomed Spectrum

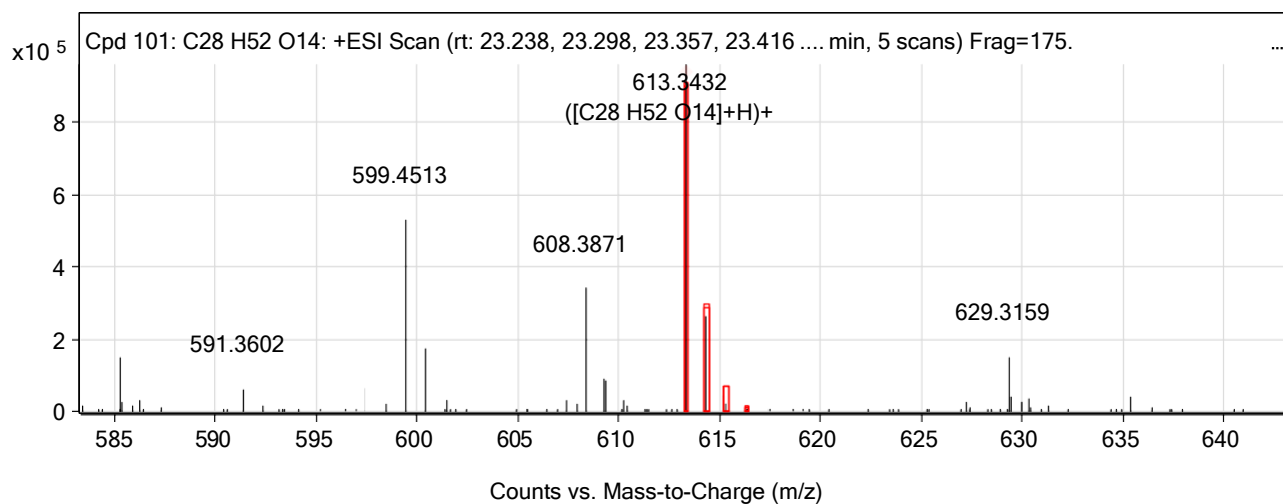

MS Spectrum Peak List

| m/z      | Calc m/z | Diff(ppm) | z | Abund      | Formula                                         | Ion                |
|----------|----------|-----------|---|------------|-------------------------------------------------|--------------------|
| 481.2635 |          |           | 1 | 544845.5   |                                                 |                    |
| 525.2904 |          |           | 1 | 875429.81  |                                                 |                    |
| 569.3167 |          |           | 1 | 1074035.63 |                                                 |                    |
| 599.4513 |          |           | 1 | 528271.88  |                                                 |                    |
| 613.3432 | 613.343  | -0.31     | 1 | 959554.19  | C <sub>28</sub> H <sub>52</sub> O <sub>14</sub> | (M+H) <sup>+</sup> |
| 614.3458 | 614.3464 | 1.05      | 1 | 264389.44  | C <sub>28</sub> H <sub>52</sub> O <sub>14</sub> | (M+H) <sup>+</sup> |
| 615.3477 | 615.3489 | 1.94      | 1 | 46233.35   | C <sub>28</sub> H <sub>52</sub> O <sub>14</sub> | (M+H) <sup>+</sup> |
| 616.3521 | 616.3515 | -0.92     | 1 | 6540.59    | C <sub>28</sub> H <sub>52</sub> O <sub>14</sub> | (M+H) <sup>+</sup> |
| 657.3696 |          |           | 1 | 686650.44  |                                                 |                    |
| 701.3953 |          |           | 1 | 424762.81  |                                                 |                    |

MSMS Spectrum

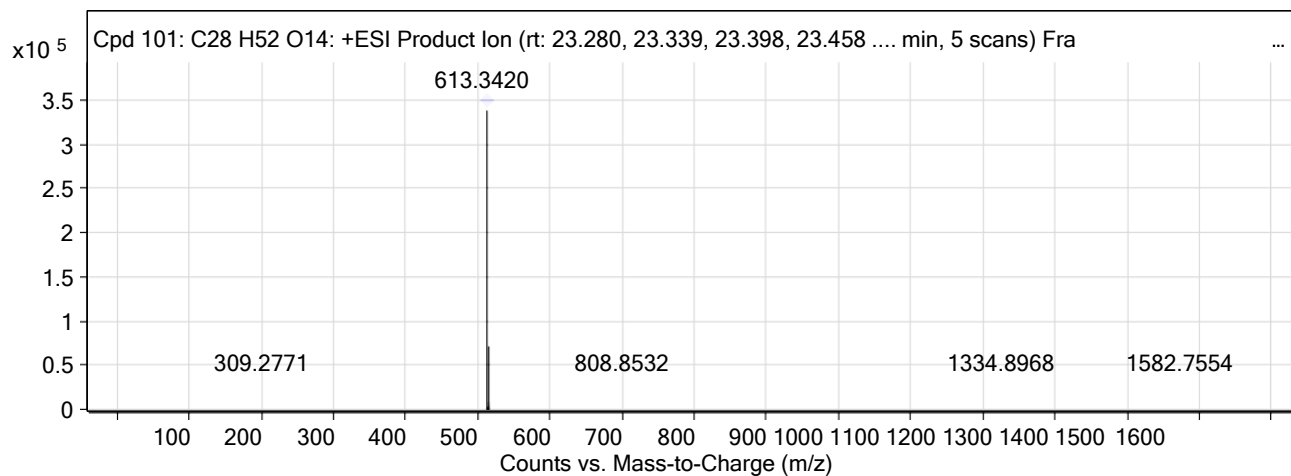

**MS/MS Spectrum Peak List**

| m/z      | Calc m/z | Diff(ppm)  | z | Abund     |
|----------|----------|------------|---|-----------|
| 133.0858 | 133.0859 | 0.59       |   | 26.51     |
| 309.2771 | 309.2788 | 5.53       |   | 62.21     |
| 311.2949 | 311.2945 | -1.43      | 1 | 50.48     |
| 609.3105 | 304.6556 | -499999.48 | 2 | 36.99     |
| 612.638  |          |            | 2 | 2056.73   |
| 612.8888 |          |            | 2 | 1530.2    |
| 613.342  | 613.343  | 1.55       | 1 | 338187.56 |
| 614.3447 |          |            | 1 | 70925.89  |
| 615.3469 |          |            | 1 | 8607.74   |
| 615.4218 |          |            | 1 | 4116.97   |

| Compound Label       | m/z      | RT   | Algorithm  | Mass     |
|----------------------|----------|------|------------|----------|
| Cpd 102: C26 H48 O13 | 569.3171 | 23.5 | Auto MS/MS | 568.3097 |

**Compound Chromatograms**

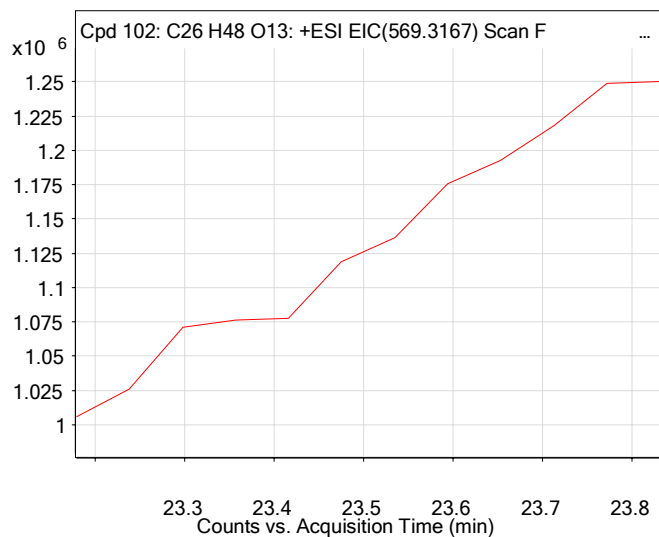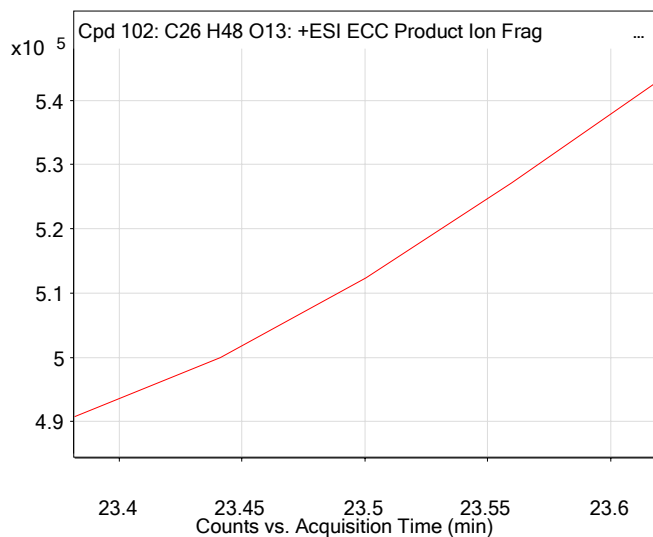

**MS Spectrum**

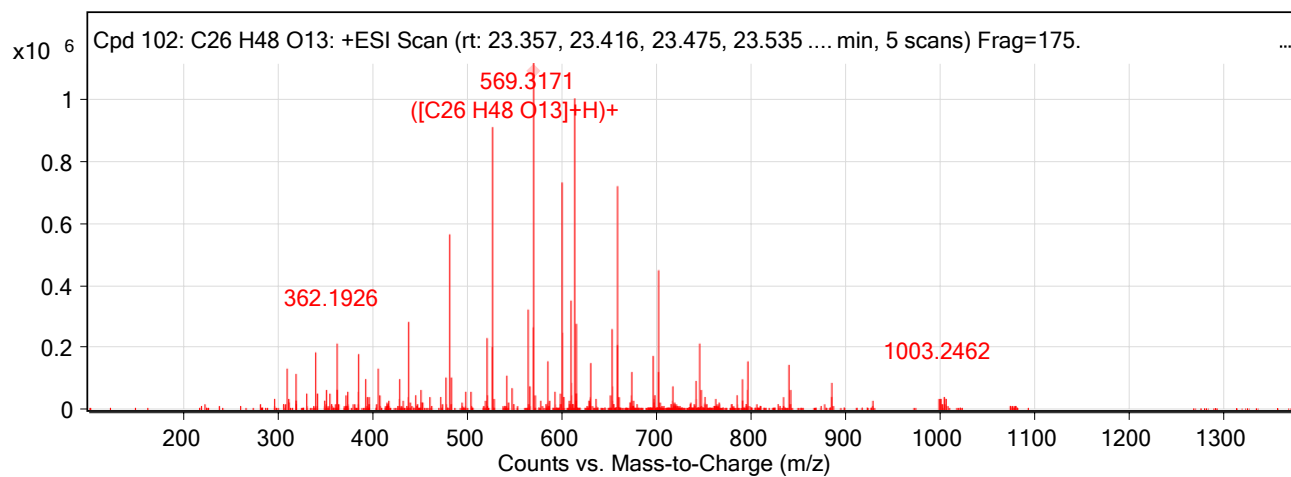

**MS Zoomed Spectrum**

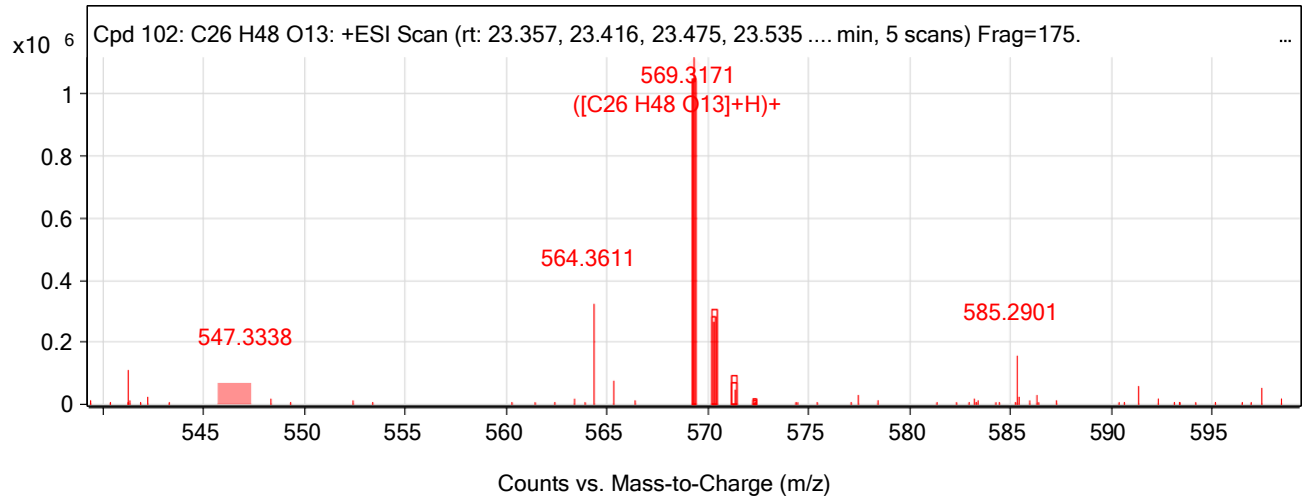

**MS Spectrum Peak List**

| m/z      | Calc m/z | Diff(ppm) | z | Abund      | Formula                                         | Ion    |
|----------|----------|-----------|---|------------|-------------------------------------------------|--------|
| 481.2638 |          |           | 1 | 567055.19  |                                                 |        |
| 525.2908 |          |           | 1 | 909620.69  |                                                 |        |
| 569.3171 | 569.3168 | -0.61     | 1 | 1117186.25 | C <sub>26</sub> H <sub>48</sub> O <sub>13</sub> | (M+H)+ |
| 570.3198 | 570.3202 | 0.77      | 1 | 266097.56  | C <sub>26</sub> H <sub>48</sub> O <sub>13</sub> | (M+H)+ |
| 571.3218 | 571.3226 | 1.39      | 1 | 45469.69   | C <sub>26</sub> H <sub>48</sub> O <sub>13</sub> | (M+H)+ |
| 572.3244 | 572.3253 | 1.48      | 1 | 6041.84    | C <sub>26</sub> H <sub>48</sub> O <sub>13</sub> | (M+H)+ |
| 599.4521 |          |           | 1 | 729352.38  |                                                 |        |
| 613.3436 |          |           | 1 | 1001034.63 |                                                 |        |
| 657.3701 |          |           | 1 | 719228.38  |                                                 |        |
| 701.3958 |          |           | 1 | 448247.31  |                                                 |        |

MSMS Spectrum

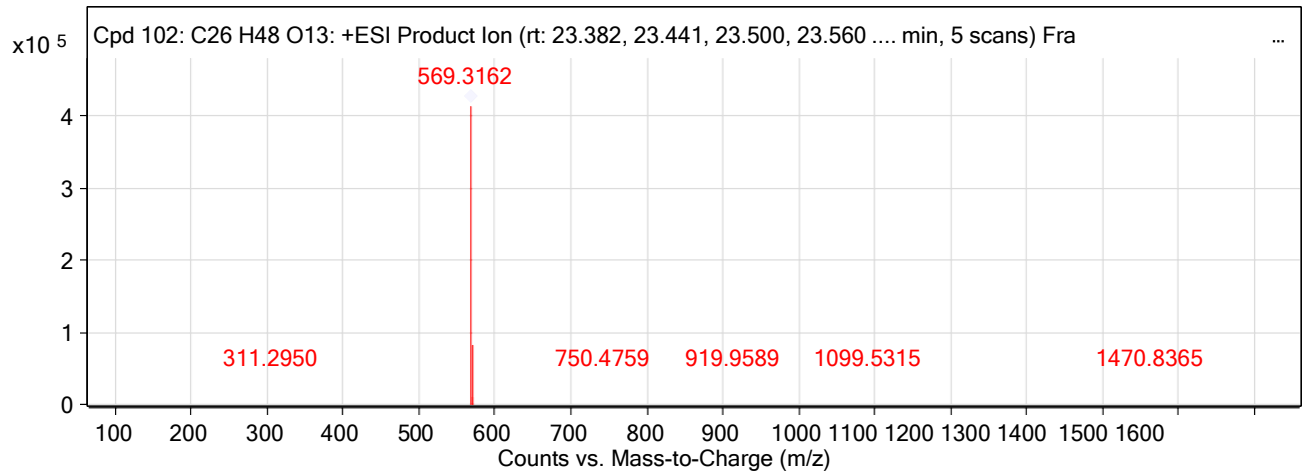

**MS/MS Spectrum PeakList**

| m/z      | Calc m/z | Diff(ppm) | z | Abund     |
|----------|----------|-----------|---|-----------|
| 133.0868 | 133.0859 | -6.42     |   | 36.74     |
| 144.0795 | 144.0761 | -9.92     |   | 12.87     |
| 221.1352 | 221.1384 | 14.24     |   | 11.82     |
| 307.2226 | 307.2268 | 13.71     |   | 13.42     |
| 309.2772 | 309.2788 | 5.12      |   | 35.01     |
| 311.295  | 311.2945 | -1.76     |   | 54.09     |
| 524.3145 | 524.3191 | 8.84      |   | 13.1      |
| 569.3162 | 569.3168 | 0.99      | 1 | 412894.56 |
| 570.3188 |          |           | 1 | 81381.33  |
| 571.321  |          |           | 1 | 9714.04   |

| Compound Label                                           | m/z      | RT     | Algorithm  | Mass     |
|----------------------------------------------------------|----------|--------|------------|----------|
| Cpd 103: C <sub>28</sub> H <sub>52</sub> O <sub>14</sub> | 613.3439 | 23.606 | Auto MS/MS | 612.3364 |

Compound Chromatograms

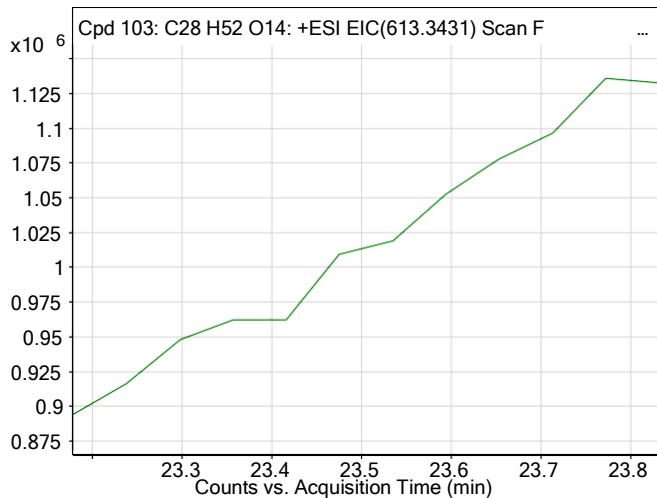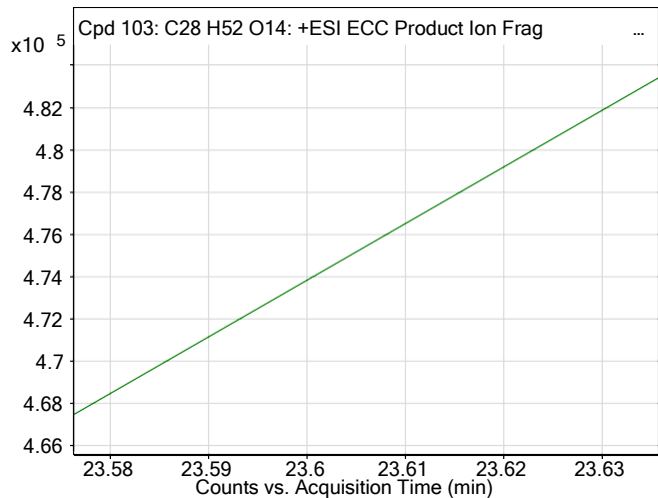

MS Spectrum

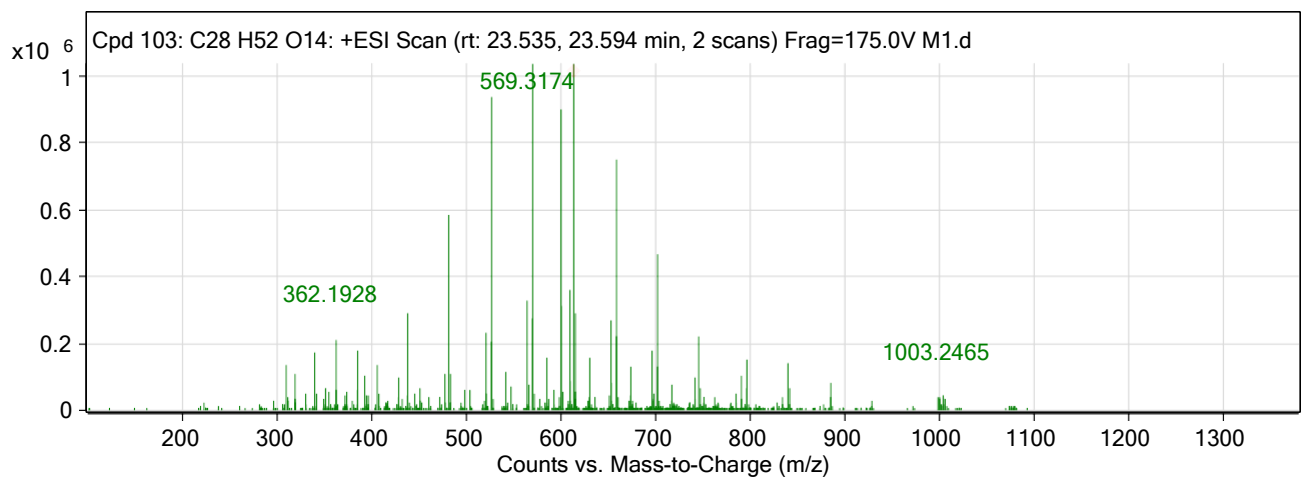

MS Zoomed Spectrum

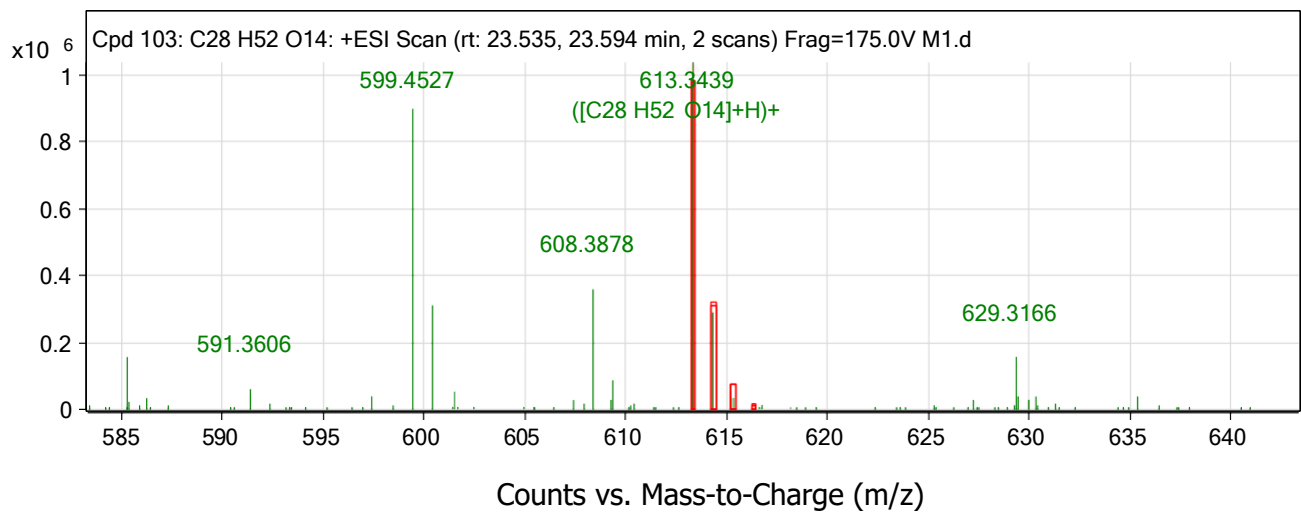

MS Spectrum Peak List

| m/z      | Calc m/z | Diff(ppm) | z | Abund      | Formula     | Ion    |
|----------|----------|-----------|---|------------|-------------|--------|
| 481.264  |          |           | 1 | 582307.13  |             |        |
| 525.291  |          |           | 1 | 937137.38  |             |        |
| 569.3174 |          |           | 1 | 1156344.13 |             |        |
| 599.4527 |          |           | 1 | 897568.38  |             |        |
| 613.3439 | 613.343  | -1.43     | 1 | 1035820.31 | C28 H52 O14 | (M+H)+ |
| 614.3464 | 614.3464 | -0.04     | 1 | 287938.81  | C28 H52 O14 | (M+H)+ |
| 615.3483 | 615.3489 | 0.84      | 1 | 51901.53   | C28 H52 O14 | (M+H)+ |
| 616.3524 | 616.3515 | -1.36     | 1 | 7134.15    | C28 H52 O14 | (M+H)+ |
| 657.3704 |          |           | 1 | 747197.56  |             |        |

MSMS Spectrum

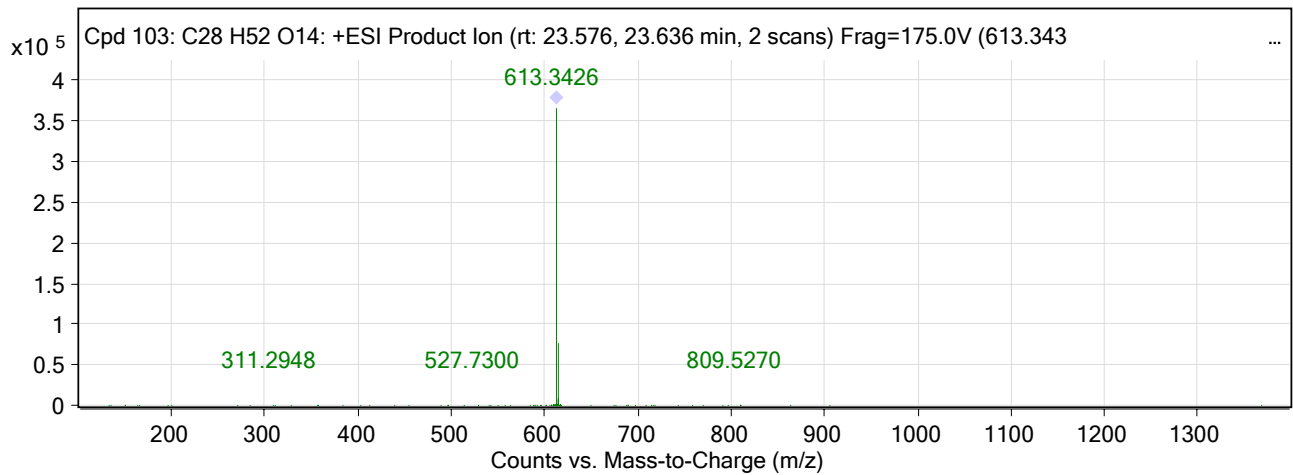

MS/MS Spectrum PeakList

| m/z      | Calc m/z | Diff(ppm) | z | Abund     |
|----------|----------|-----------|---|-----------|
| 133.0848 | 133.0859 | 8.5       |   | 49.9      |
| 166.0896 | 166.0836 | -36.54    |   | 39.06     |
| 309.2779 | 309.2788 | 2.87      |   | 55.92     |
| 311.2948 | 311.2945 | -1.07     |   | 105.16    |
| 600.3332 | 600.3352 | 3.3       |   | 38.5      |
| 612.3877 |          |           | 2 | 1590.68   |
| 613.3426 | 613.343  | 0.64      | 1 | 366254.19 |
| 614.3454 |          |           | 1 | 77266.01  |
| 615.3474 |          |           | 1 | 9642.66   |
| 615.4231 |          |           | 1 | 5856.19   |

| Compound Label       | m/z      | RT     | Algorithm  | Mass     |
|----------------------|----------|--------|------------|----------|
| Cpd 104: C26 H48 O13 | 569.3169 | 23.776 | Auto MS/MS | 568.3094 |

Compound Chromatograms

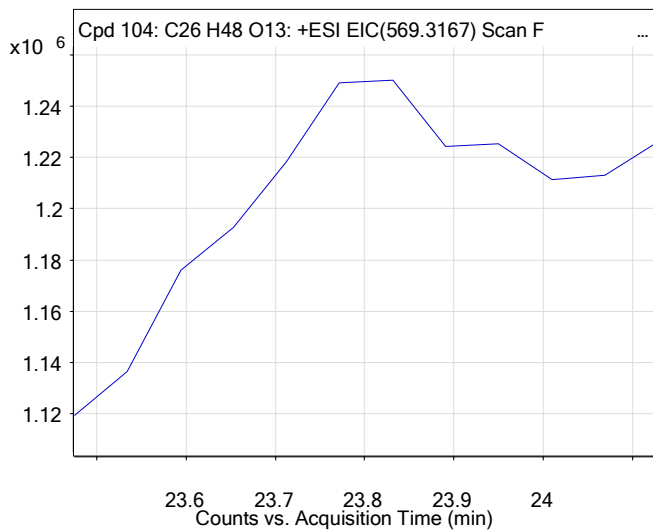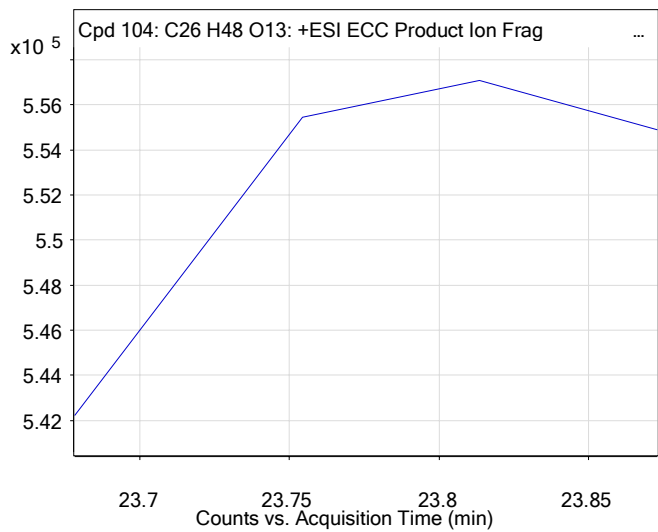

MS Spectrum



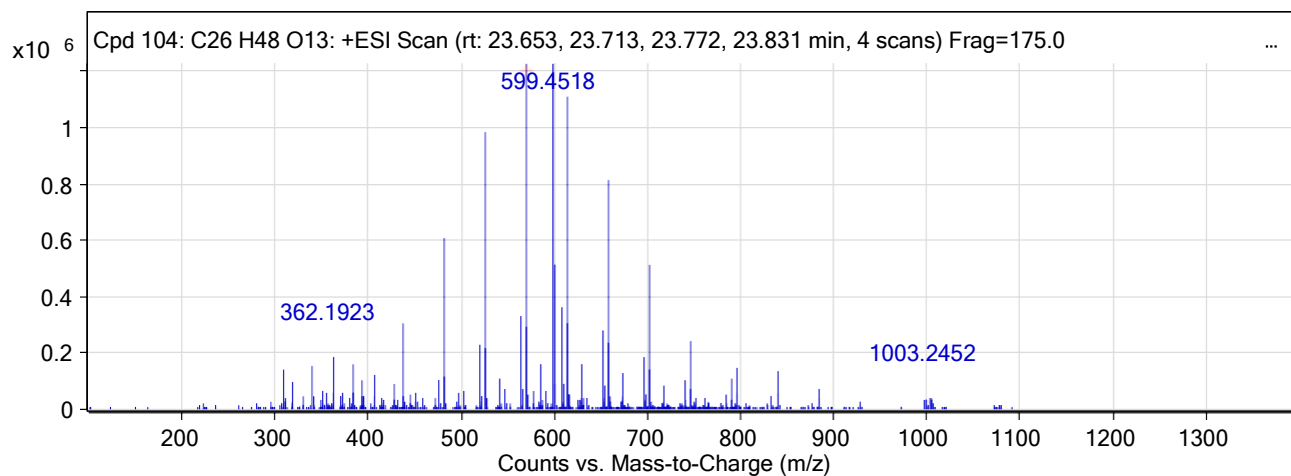

MS Zoomed Spectrum

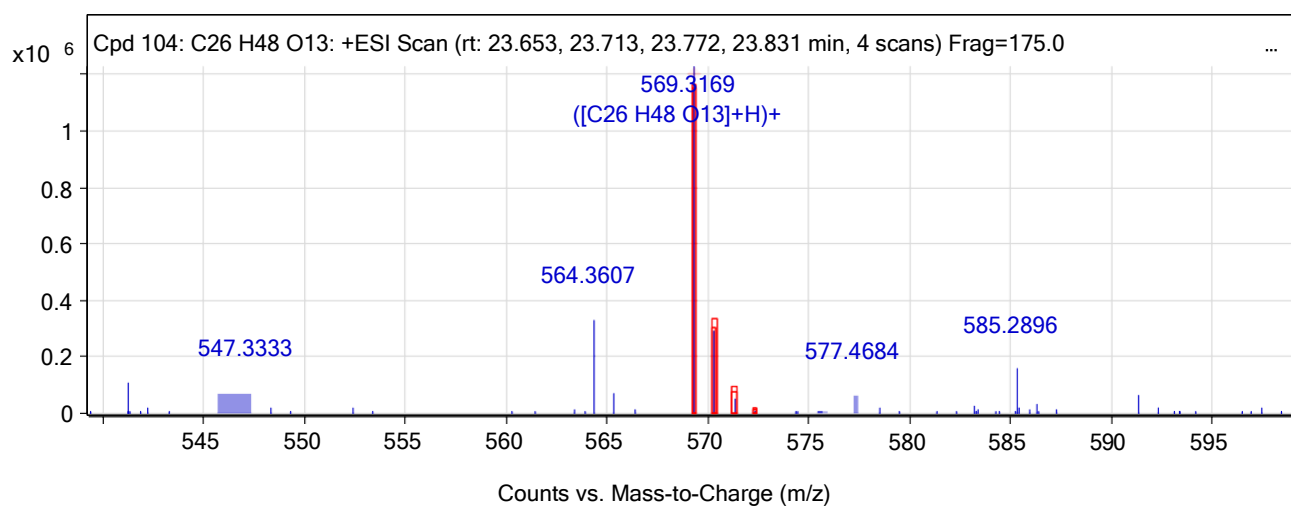

MS Spectrum Peak List

| m/z      | Calc m/z | Diff(ppm) | z | Abund      | Formula                                         | Ion    |
|----------|----------|-----------|---|------------|-------------------------------------------------|--------|
| 481.2635 |          |           | 1 | 608362.13  |                                                 |        |
| 525.2904 |          |           | 1 | 984300.31  |                                                 |        |
| 569.3169 | 569.3168 | -0.25     | 1 | 1227655.13 | C <sub>26</sub> H <sub>48</sub> O <sub>13</sub> | (M+H)+ |
| 570.3194 | 570.3202 | 1.44      | 1 | 293305.69  | C <sub>26</sub> H <sub>48</sub> O <sub>13</sub> | (M+H)+ |
| 571.3213 | 571.3226 | 2.3       | 1 | 49291.32   | C <sub>26</sub> H <sub>48</sub> O <sub>13</sub> | (M+H)+ |
| 572.3238 | 572.3253 | 2.57      | 1 | 6827.15    | C <sub>26</sub> H <sub>48</sub> O <sub>13</sub> | (M+H)+ |
| 599.4518 |          |           | 1 | 1439994.5  |                                                 |        |
| 600.4549 |          |           | 1 | 511647.69  |                                                 |        |
| 613.3431 |          |           | 1 | 1110704.75 |                                                 |        |
| 657.3698 |          |           | 1 | 807785.19  |                                                 |        |

MSMS Spectrum

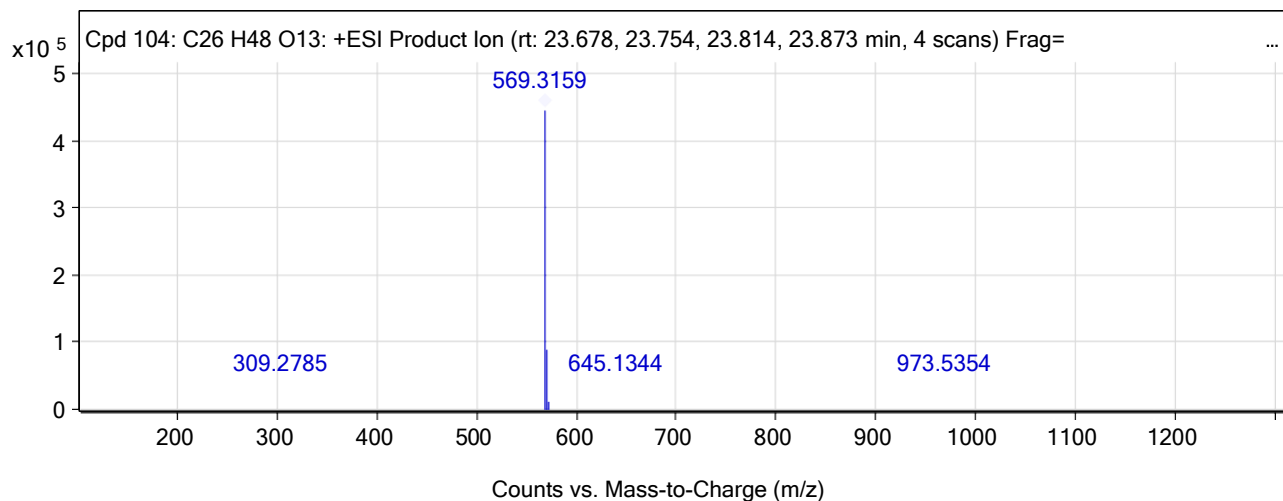

**MS/MS Spectrum Peak List**

| m/z      | Calc m/z | Diff(ppm) | z | Abund     |
|----------|----------|-----------|---|-----------|
| 133.0866 | 133.0859 | -4.73     |   | 30.57     |
| 144.0755 | 144.0781 | 18.02     |   | 25.8      |
| 177.1112 | 177.1121 | 5.18      |   | 24.66     |
| 279.2311 | 279.2319 | 2.58      |   | 19.01     |
| 309.2785 | 309.2788 | 0.85      |   | 35.99     |
| 311.2947 | 311.2945 | -0.72     |   | 25.76     |
| 318.2441 | 318.2401 | -12.57    |   | 29.43     |
| 426.2838 | 426.2823 | -3.4      |   | 18.49     |
| 566.2956 | 566.2933 | -4.02     | 1 | 43.27     |
| 569.3159 | 569.3168 | 1.59      | 1 | 444493.88 |

| Compound Label                                                   | Name                                                    | m/z      | RT     | Algorithm  | Mass     |
|------------------------------------------------------------------|---------------------------------------------------------|----------|--------|------------|----------|
| Cpd 105: 1-(O-alpha-D-glucopyranosyl)-(1,3R,25R)-hexacosanetriol | 1-(O-alpha-D-glucopyranosyl)-(1,3R,25R)-hexacosanetriol | 599.4517 | 23.805 | Auto MS/MS | 576.4623 |

**Compound Chromatograms**

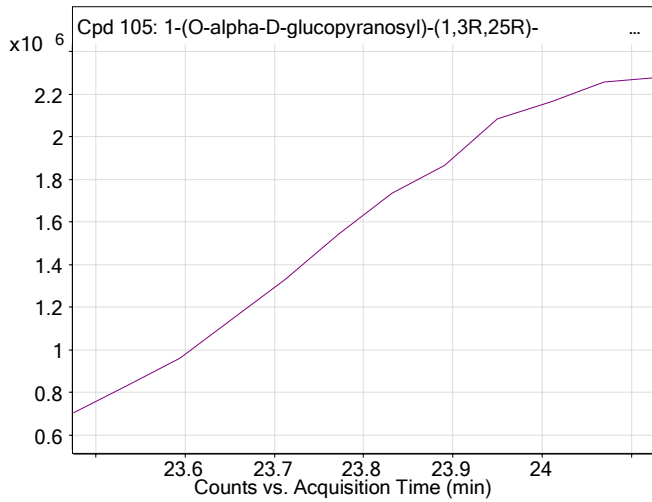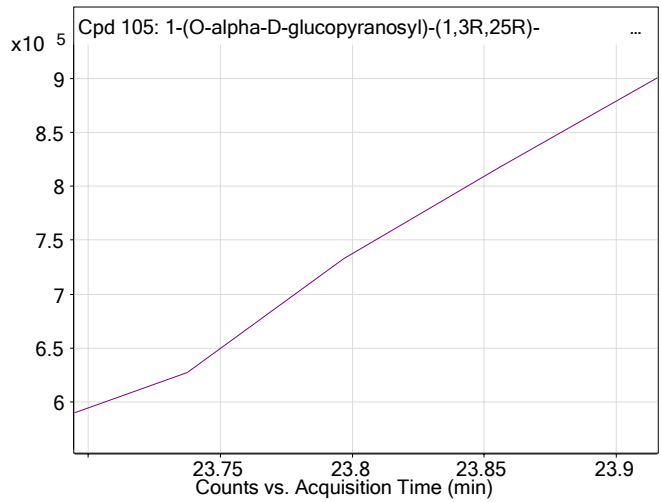

**MS Spectrum**

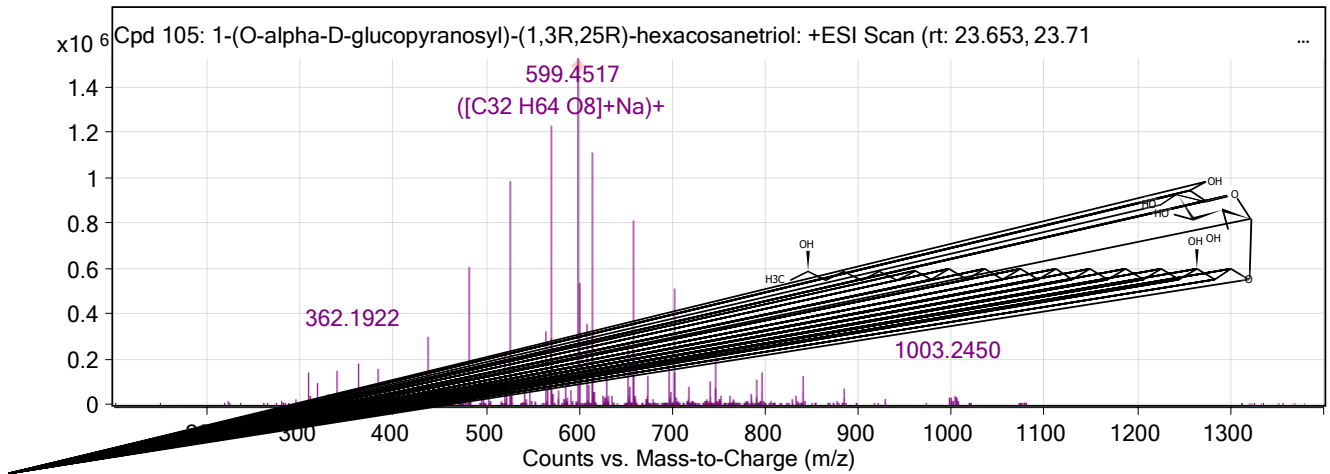

**MS Zoomed Spectrum**

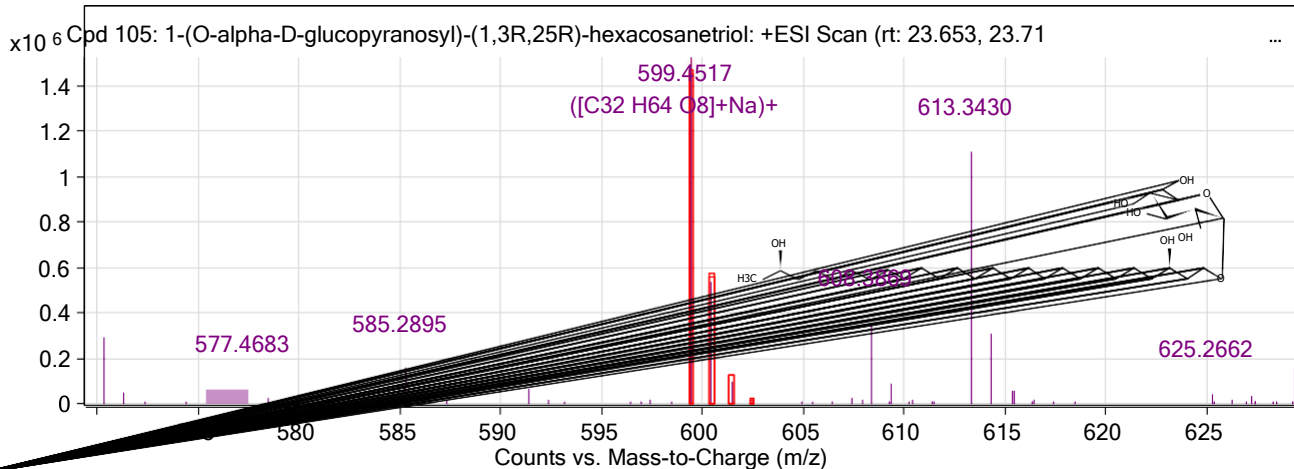

**MS Spectrum Peak List**

| m/z      | Calc m/z | Diff(ppm) | z | Abund      | Formula    | Ion     |
|----------|----------|-----------|---|------------|------------|---------|
| 481.2634 |          |           | 1 | 607703     |            |         |
| 525.2903 |          |           | 1 | 983993.69  |            |         |
| 569.3168 |          |           | 1 | 1227019.25 |            |         |
| 599.4517 | 599.4493 | -3.9      | 1 | 1525543.38 | C32 H64 O8 | (M+Na)+ |
| 600.4548 | 600.4528 | -3.44     | 1 | 538817.63  | C32 H64 O8 | (M+Na)+ |
| 601.4569 | 601.4556 | -2.04     | 1 | 94558.28   | C32 H64 O8 | (M+Na)+ |
| 602.4591 | 602.4584 | -1.05     | 1 | 11598.64   | C32 H64 O8 | (M+Na)+ |
| 613.343  |          |           | 1 | 1112483.5  |            |         |
| 657.3697 |          |           | 1 | 808548.56  |            |         |
| 701.3951 |          |           | 1 | 510865.91  |            |         |

MSMS Spectrum

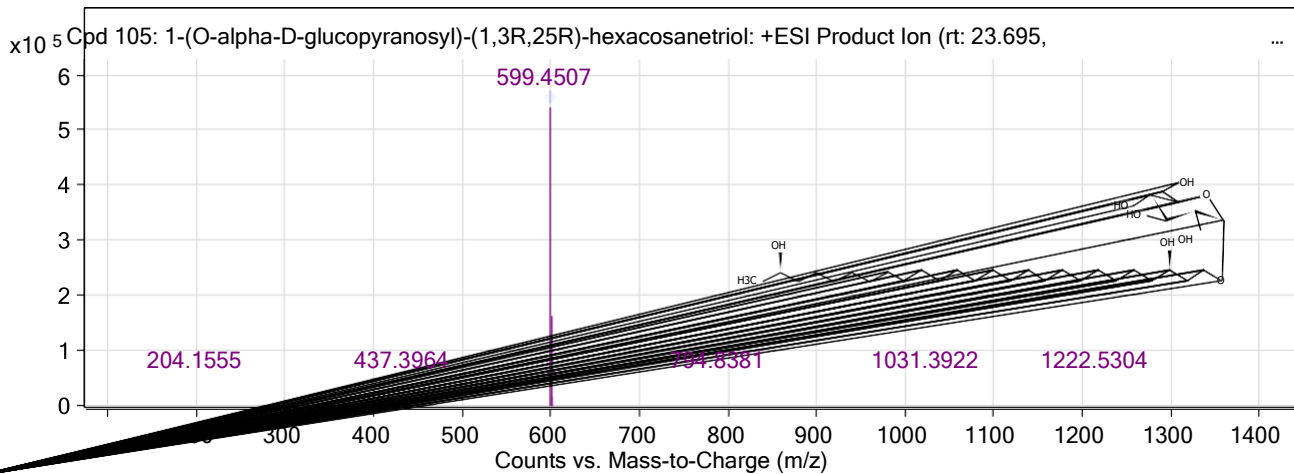

**MS/MS Spectrum Peak List**

| m/z      | Calc m/z | Diff(ppm) | z | Abund     |
|----------|----------|-----------|---|-----------|
| 133.0858 | 133.0859 | 0.78      |   | 43.81     |
| 437.3964 | 437.3989 | 5.65      | 1 | 45.34     |
| 596.4369 | 596.4283 | -14.52    | 1 | 82.17     |
| 598.4338 |          |           | 1 | 1181.01   |
| 599.4507 | 599.4517 | 1.71      | 1 | 540810.13 |
| 600.3798 |          |           |   | 1046.93   |
| 600.4538 |          |           | 1 | 161387.34 |
| 601.3829 |          |           | 2 | 1331.04   |
| 601.4559 |          |           | 1 | 16905.85  |
| 601.6333 |          |           | 2 | 1025.77   |

**Compound Structure**

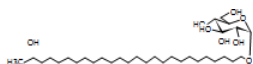

| Compound Label       | m/z      | RT     | Algorithm  | Mass     |
|----------------------|----------|--------|------------|----------|
| Cpd 106: C26 H48 O13 | 569.3169 | 24.051 | Auto MS/MS | 568.3094 |

Compound Chromatograms

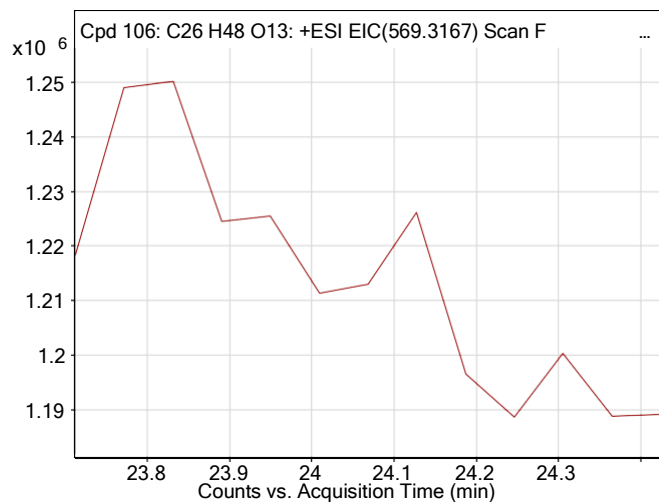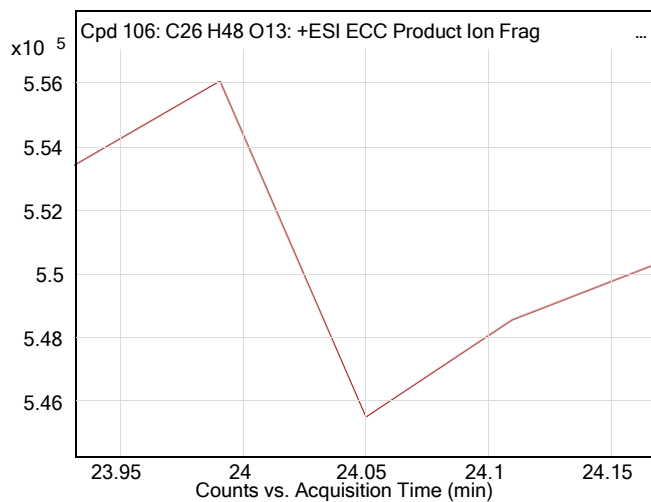

MS Spectrum

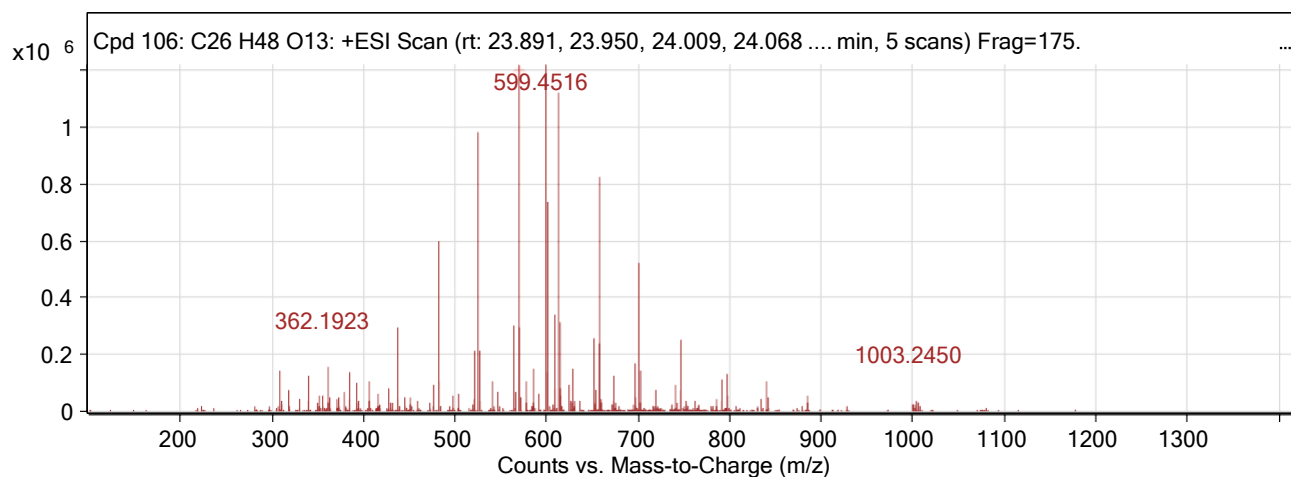

MS Zoomed Spectrum

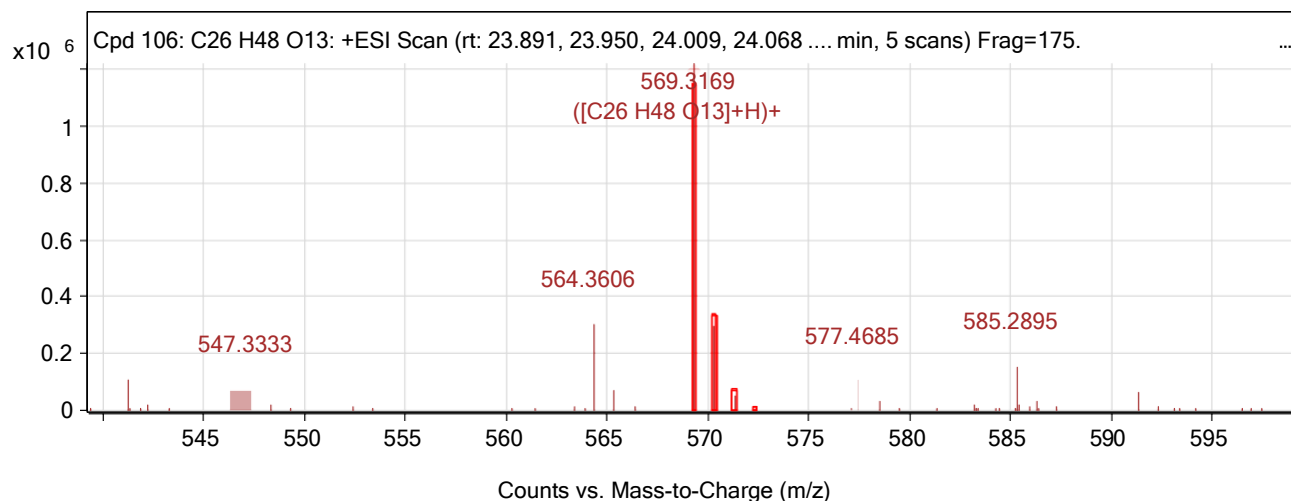

MS Spectrum Peak List

| <i>m/z</i> | Calc <i>m/z</i> | Diff(ppm) | z | Abund      | Formula                                         | Ion                |
|------------|-----------------|-----------|---|------------|-------------------------------------------------|--------------------|
| 481.2634   |                 |           | 1 | 598518.56  |                                                 |                    |
| 525.2903   |                 |           | 1 | 978449.81  |                                                 |                    |
| 569.3169   | 569.3168        | -0.18     | 1 | 1220115.25 | C <sub>26</sub> H <sub>48</sub> O <sub>13</sub> | (M+H) <sup>+</sup> |
| 570.3194   | 570.3202        | 1.47      | 1 | 293695.94  | C <sub>26</sub> H <sub>48</sub> O <sub>13</sub> | (M+H) <sup>+</sup> |
| 571.3214   | 571.3226        | 2.18      | 1 | 49484.75   | C <sub>26</sub> H <sub>48</sub> O <sub>13</sub> | (M+H) <sup>+</sup> |
| 572.3241   | 572.3253        | 2.15      | 1 | 7024.04    | C <sub>26</sub> H <sub>48</sub> O <sub>13</sub> | (M+H) <sup>+</sup> |
| 599.4516   |                 |           | 1 | 2130492.25 |                                                 |                    |
| 600.4551   |                 |           | 1 | 738615.44  |                                                 |                    |
| 613.343    |                 |           | 1 | 1118903.75 |                                                 |                    |
| 657.3699   |                 |           | 1 | 821897.38  |                                                 |                    |

MSMS Spectrum

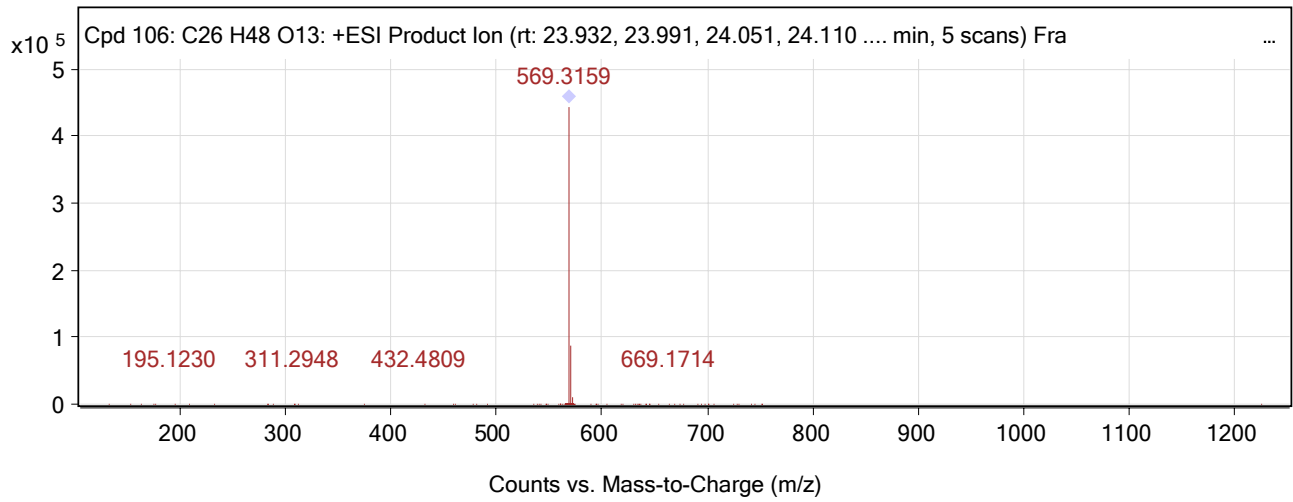

MS/MS Spectrum Peak List

| m/z      | Calc m/z | Diff(ppm)  | z | Abund     |
|----------|----------|------------|---|-----------|
| 133.0865 | 133.0859 | -4.14      |   | 42.47     |
| 175.1311 | 175.1329 | 9.85       |   | 10.45     |
| 177.1111 | 177.1121 | 5.67       |   | 12.05     |
| 208.1325 | 208.1305 | -9.35      |   | 14.52     |
| 283.2691 | 283.2632 | -21.02     |   | 10.81     |
| 309.2781 | 309.2788 | 2.27       |   | 17.79     |
| 311.2948 | 311.2945 | -1.11      |   | 73.84     |
| 481.2654 | 481.2643 | -2.22      |   | 11        |
| 566.3025 | 283.1464 | -500008.59 | 2 | 10.61     |
| 569.3159 | 569.3168 | 1.56       | 1 | 443825.69 |

| Compound Label                                                   | Name                                                    | m/z     | RT     | Algorithm  | Mass     |
|------------------------------------------------------------------|---------------------------------------------------------|---------|--------|------------|----------|
| Cpd 107: 1-(O-alpha-D-glucopyranosyl)-(1,3R,25R)-hexacosanetriol | 1-(O-alpha-D-glucopyranosyl)-(1,3R,25R)-hexacosanetriol | 599.452 | 24.093 | Auto MS/MS | 576.4627 |

Compound Chromatograms

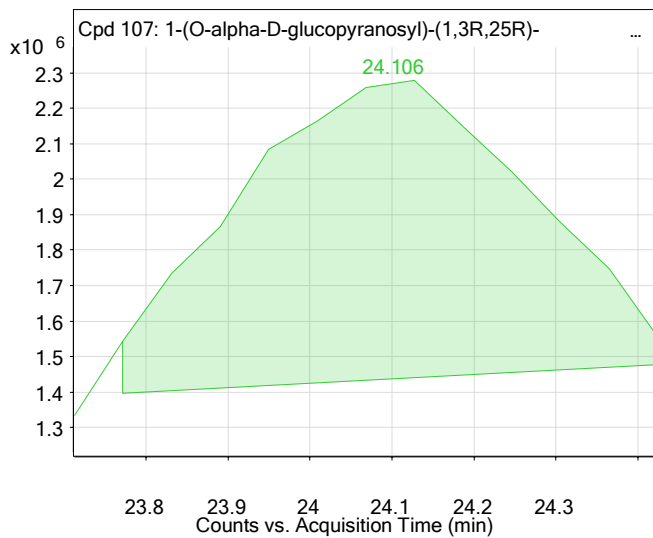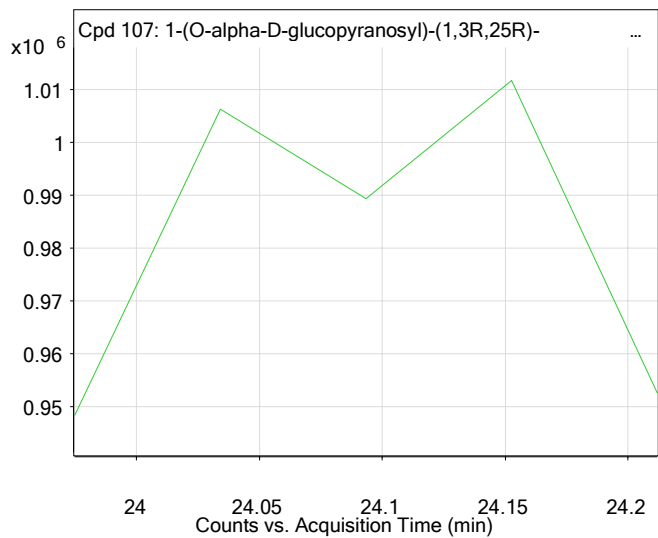

MS Spectrum

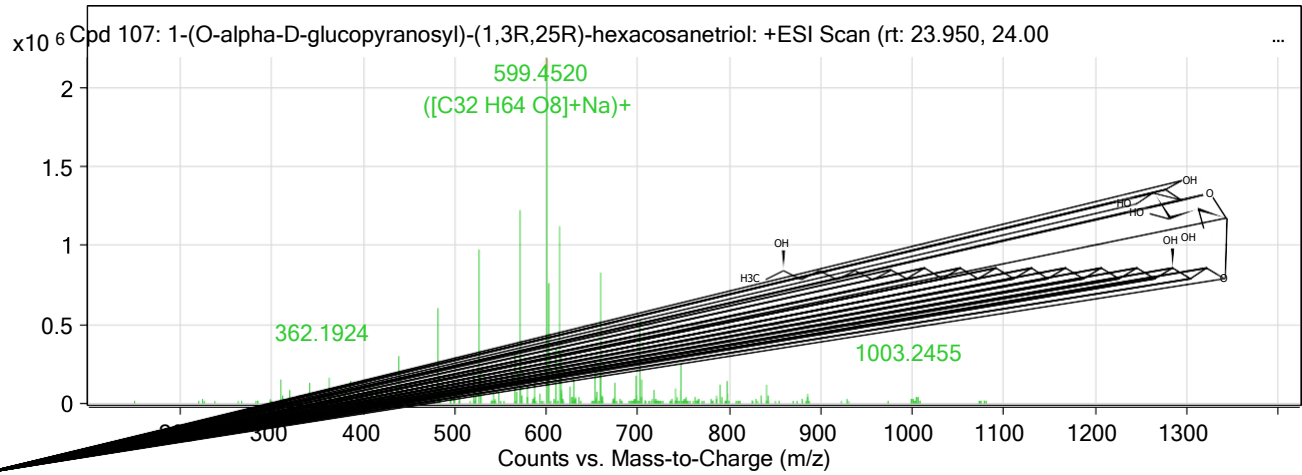

MS Zoomed Spectrum

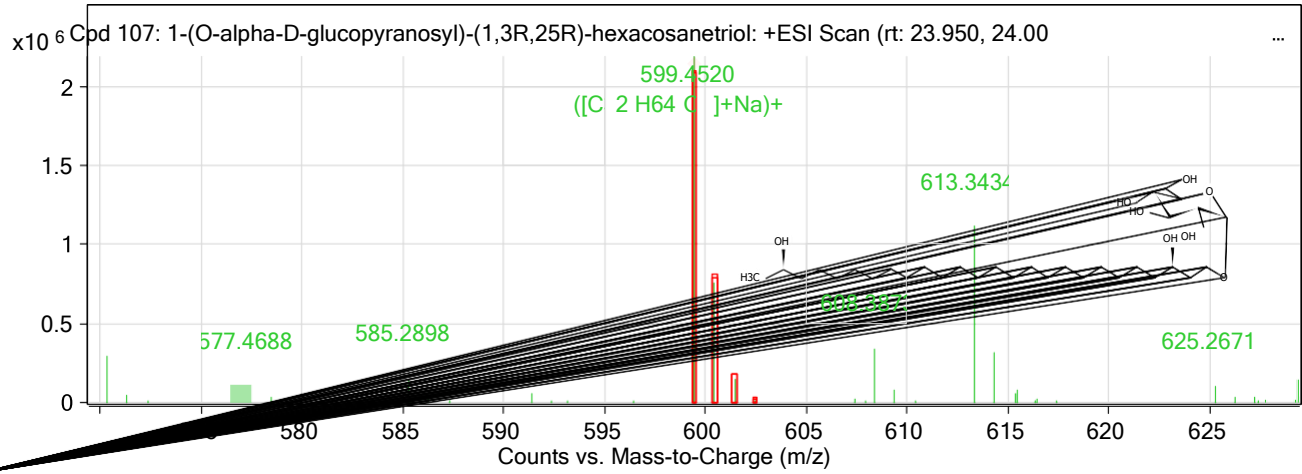

MS Spectrum Peak List

| m/z      | Calc m/z | Diff(ppm) | z | Abund      | Formula    | Ion     |
|----------|----------|-----------|---|------------|------------|---------|
| 481.2636 |          |           | 1 | 595879.81  |            |         |
| 525.2906 |          |           | 1 | 973428.5   |            |         |
| 569.3172 |          |           | 1 | 1214531.5  |            |         |
| 599.452  | 599.4493 | -4.38     | 1 | 2186233.5  | C32 H64 O8 | (M+Na)+ |
| 600.4554 | 600.4528 | -4.44     | 1 | 756813.38  | C32 H64 O8 | (M+Na)+ |
| 601.4575 | 601.4556 | -3.17     | 1 | 141985.89  | C32 H64 O8 | (M+Na)+ |
| 602.4595 | 602.4584 | -1.78     | 1 | 16831.85   | C32 H64 O8 | (M+Na)+ |
| 613.3434 |          |           | 1 | 1112025.75 |            |         |
| 657.3703 |          |           | 1 | 818650.31  |            |         |
| 701.3956 |          |           | 1 | 520570.16  |            |         |

MSMS Spectrum

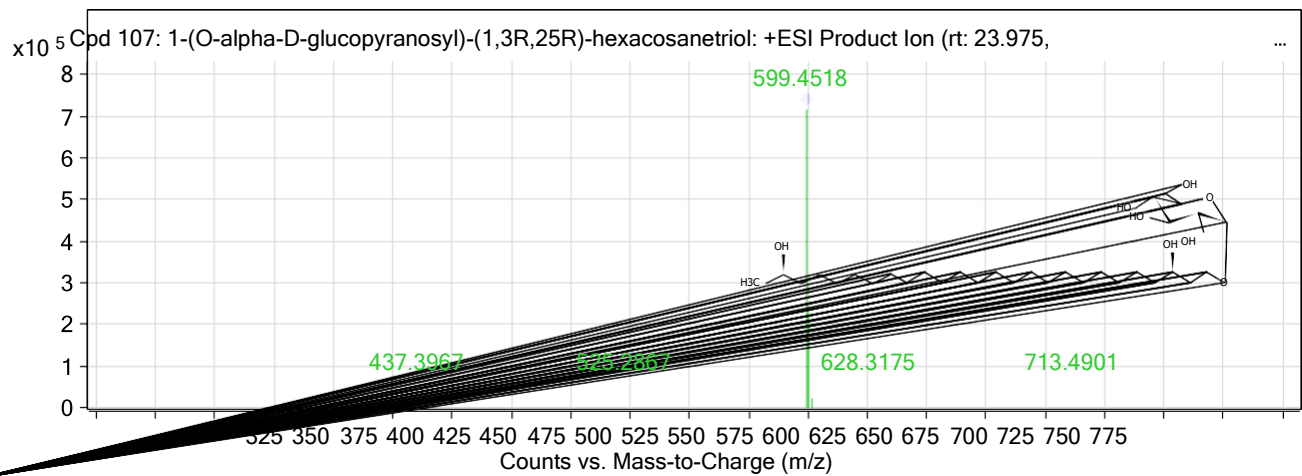

**MS/MS Spectrum Peak List**

| m/z      | Calc m/z | Diff(ppm) | z | Abund     |
|----------|----------|-----------|---|-----------|
| 309.2823 | 309.2788 | -11.34    | 1 | 16.72     |
| 311.2945 | 311.2945 | 0         | 1 | 31.16     |
| 437.3967 | 437.3989 | 5.18      | 1 | 29.71     |
| 485.383  | 485.3837 | 1.34      | 1 | 16.13     |
| 595.4194 | 595.4204 | 1.7       | 1 | 108.91    |
| 599.4518 | 599.4517 | -0.16     | 1 | 717009.44 |
| 600.4544 |          |           | 1 | 228363.16 |
| 601.3841 |          |           | 2 | 1105.52   |
| 601.4564 |          |           | 1 | 23486.63  |
| 601.6329 |          |           | 2 | 1111.56   |

**Compound Structure**

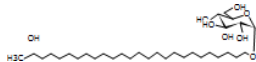

| Compound Label       | m/z      | RT     | Algorithm  | Mass     |
|----------------------|----------|--------|------------|----------|
| Cpd 108: C26 H48 O13 | 569.3171 | 24.347 | Auto MS/MS | 568.3096 |

**Compound Chromatograms**

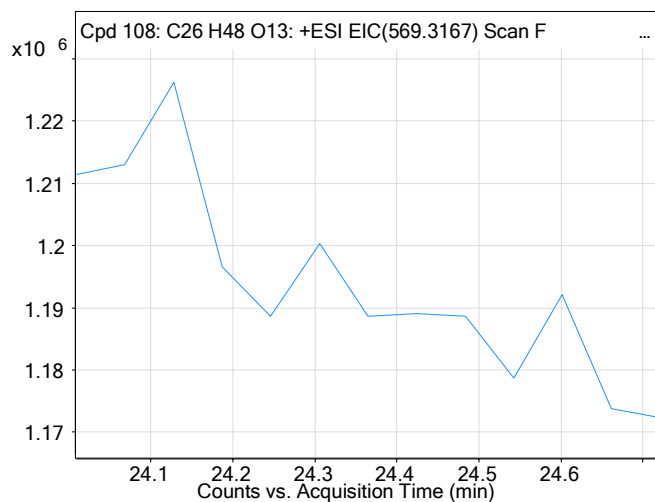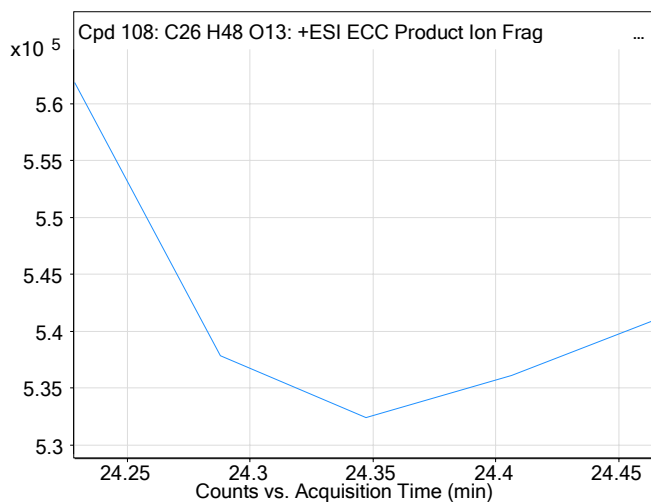

MS Spectrum

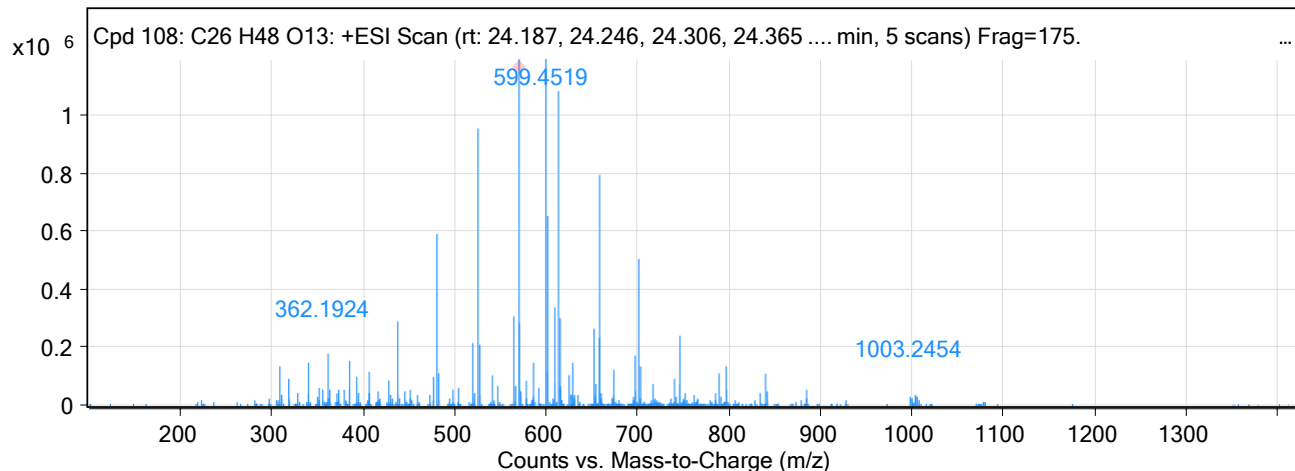

MS Zoomed Spectrum



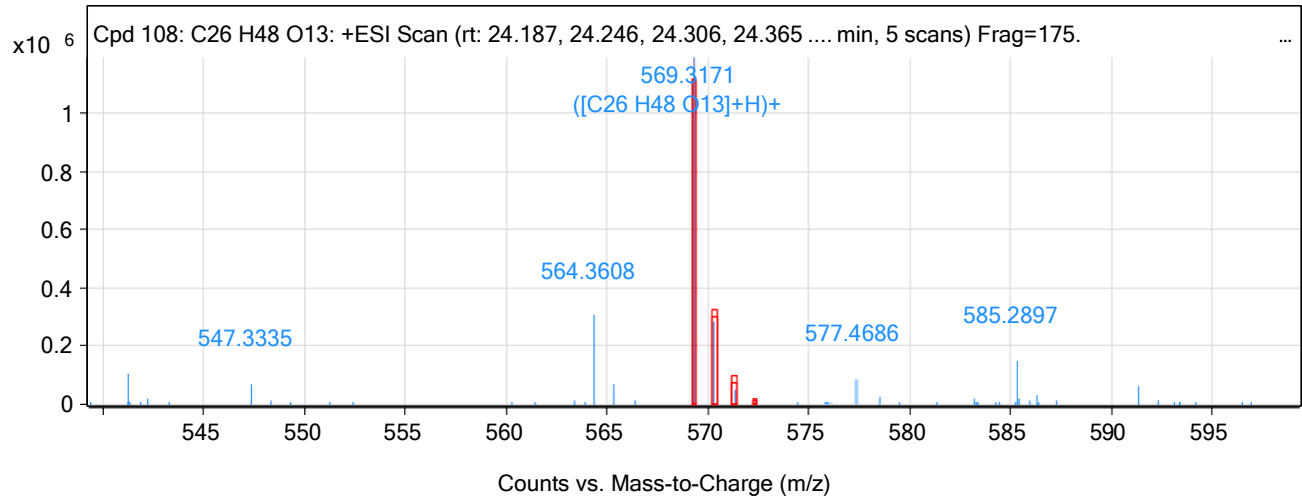

**MS Spectrum Peak List**

| m/z      | Calc m/z | Diff(ppm) | z | Abund      | Formula                                         | Ion                |
|----------|----------|-----------|---|------------|-------------------------------------------------|--------------------|
| 481.2636 |          |           | 1 | 593076.63  |                                                 |                    |
| 525.2905 |          |           | 1 | 955259.31  |                                                 |                    |
| 569.3171 | 569.3168 | -0.55     | 1 | 1192680.13 | C <sub>26</sub> H <sub>48</sub> O <sub>13</sub> | (M+H) <sup>+</sup> |
| 570.3195 | 570.3202 | 1.17      | 1 | 283467.19  | C <sub>26</sub> H <sub>48</sub> O <sub>13</sub> | (M+H) <sup>+</sup> |
| 571.3215 | 571.3226 | 1.97      | 1 | 48371.6    | C <sub>26</sub> H <sub>48</sub> O <sub>13</sub> | (M+H) <sup>+</sup> |
| 572.3238 | 572.3253 | 2.54      | 1 | 6457.95    | C <sub>26</sub> H <sub>48</sub> O <sub>13</sub> | (M+H) <sup>+</sup> |
| 599.4519 |          |           | 1 | 1870128.25 |                                                 |                    |
| 600.4552 |          |           | 1 | 651010.94  |                                                 |                    |
| 613.3433 |          |           | 1 | 1082561.38 |                                                 |                    |
| 657.3702 |          |           | 1 | 790539.25  |                                                 |                    |

MSMS Spectrum

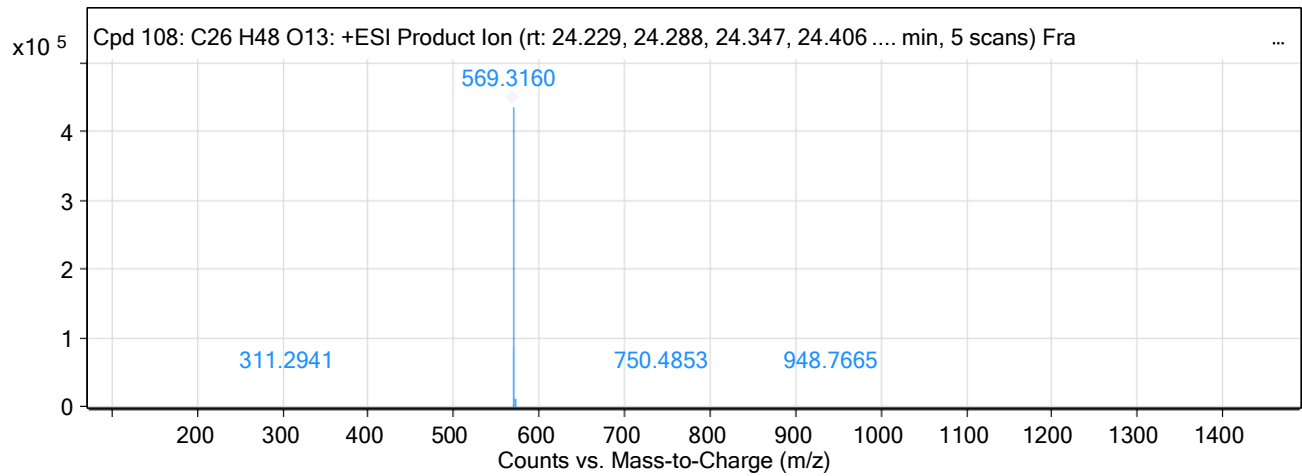

**MS/MS Spectrum Peak List**

| m/z      | Calc m/z | Diff(ppm) | z | Abund     |
|----------|----------|-----------|---|-----------|
| 133.0851 | 133.0859 | 6.06      |   | 23.64     |
| 309.278  | 309.2788 | 2.64      |   | 45.95     |
| 311.2941 | 311.2945 | 1.02      |   | 69.51     |
| 568.3623 |          |           | 2 | 686.67    |
| 568.6119 |          |           | 1 | 524.14    |
| 568.8621 |          |           | 2 | 474.63    |
| 569.316  | 569.3168 | 1.32      | 1 | 435245.06 |
| 570.3186 |          |           | 1 | 85659.48  |
| 571.3207 |          |           | 1 | 10216.75  |
| 571.3884 |          |           | 2 | 715.02    |

| Compound Label                                                   | Name                                                    | m/z      | RT    | Algorithm  | Mass     |
|------------------------------------------------------------------|---------------------------------------------------------|----------|-------|------------|----------|
| Cpd 109: 1-(O-alpha-D-glucopyranosyl)-(1,3R,25R)-hexacosanetriol | 1-(O-alpha-D-glucopyranosyl)-(1,3R,25R)-hexacosanetriol | 599.4517 | 24.39 | Auto MS/MS | 576.4624 |

Compound Chromatograms

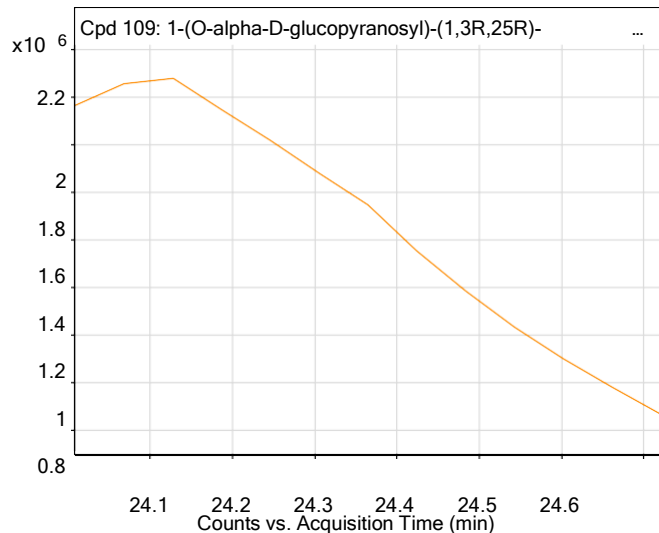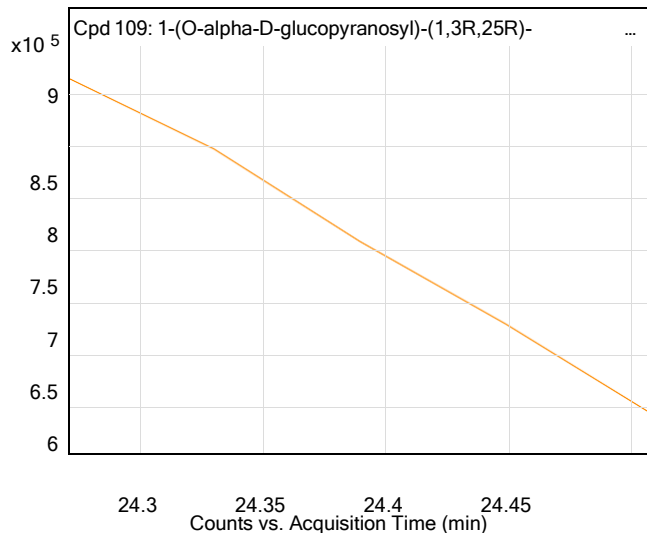

MS Spectrum

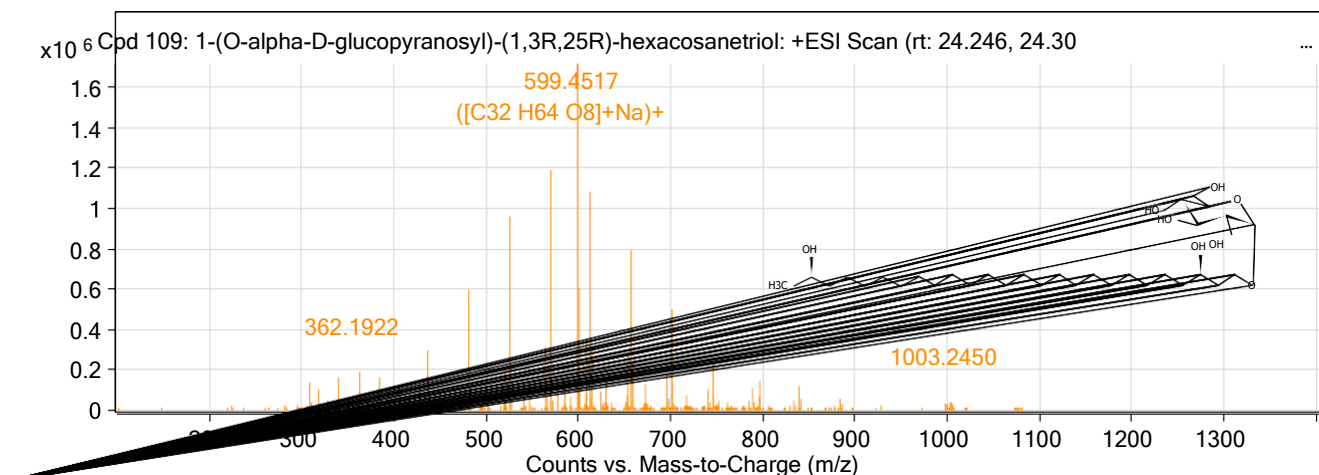

MS Zoomed Spectrum

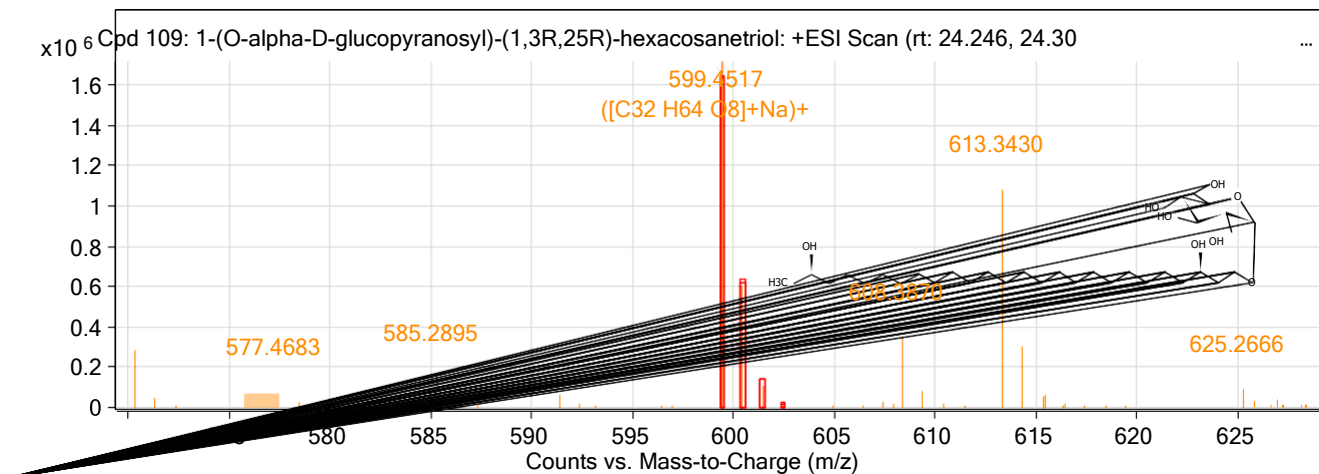

MS Spectrum Peak List

| m/z      | Calc m/z | Diff(ppm) | z | Abund      | Formula    | Ion                 |
|----------|----------|-----------|---|------------|------------|---------------------|
| 481.2634 |          |           | 1 | 593118.31  |            |                     |
| 525.2903 |          |           | 1 | 953829.88  |            |                     |
| 569.3169 |          |           | 1 | 1191094.75 |            |                     |
| 599.4517 | 599.4493 | -3.95     | 1 | 1717793.75 | C32 H64 O8 | [M+Na] <sup>+</sup> |
| 600.4549 | 600.4528 | -3.56     | 1 | 601585.06  | C32 H64 O8 | [M+Na] <sup>+</sup> |
| 601.457  | 601.4556 | -2.21     | 1 | 107491.75  | C32 H64 O8 | [M+Na] <sup>+</sup> |
| 602.4591 | 602.4584 | -1.14     | 1 | 12970.83   | C32 H64 O8 | [M+Na] <sup>+</sup> |
| 613.343  |          |           | 1 | 1080732.25 |            |                     |
| 657.3699 |          |           | 1 | 786895     |            |                     |

MSMS Spectrum

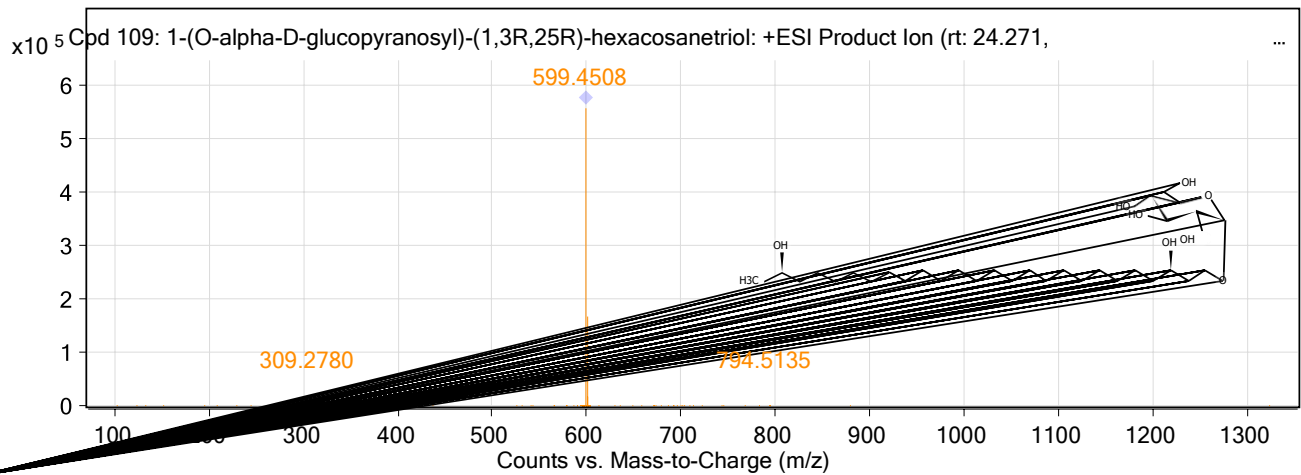

MS/MS Spectrum Peak List

| m/z      | Calc m/z | Diff(ppm) | z | Abund     |
|----------|----------|-----------|---|-----------|
| 133.0875 | 133.0859 | -11.93    |   | 20.24     |
| 309.278  | 309.2788 | 2.72      | 1 | 73.65     |
| 398.3812 | 398.3754 | -14.49    |   | 12.11     |
| 437.3945 | 437.3989 | 10.08     |   | 58.86     |
| 596.4279 | 596.4283 | 0.62      |   | 59.23     |
| 599.4508 | 599.4517 | 1.52      | 1 | 558242.88 |
| 600.4539 |          |           | 1 | 168435.06 |
| 601.3822 |          |           | 2 | 1368.93   |
| 601.4559 |          |           | 1 | 17590.48  |
| 601.6323 |          |           | 2 | 1152.45   |

Compound Structure

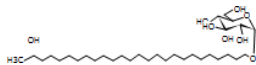

| Compound Label                                                   | Name                                                    | m/z     | RT     | Algorithm  | Mass     |
|------------------------------------------------------------------|---------------------------------------------------------|---------|--------|------------|----------|
| Cpd 110: 1-(O-alpha-D-glucopyranosyl)-(1,3R,25R)-hexacosanetriol | 1-(O-alpha-D-glucopyranosyl)-(1,3R,25R)-hexacosanetriol | 599.452 | 24.606 | Auto MS/MS | 576.4626 |

Compound Chromatograms

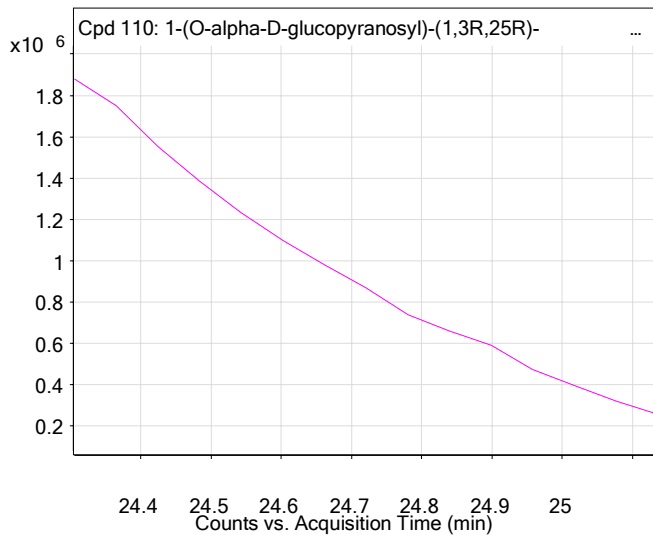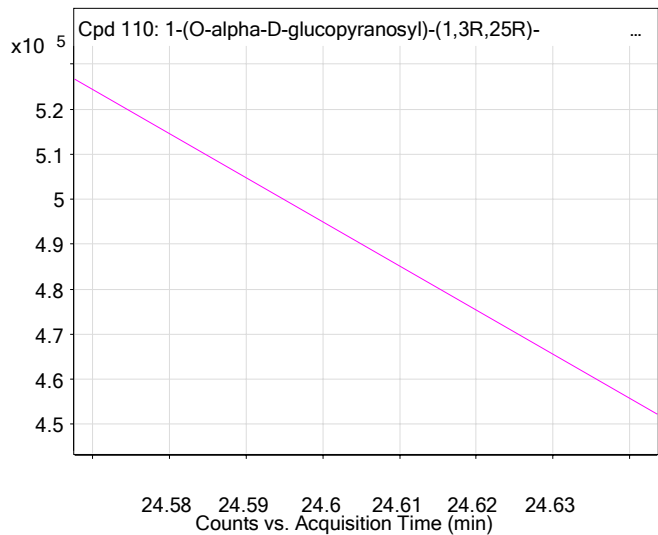

MS Spectrum

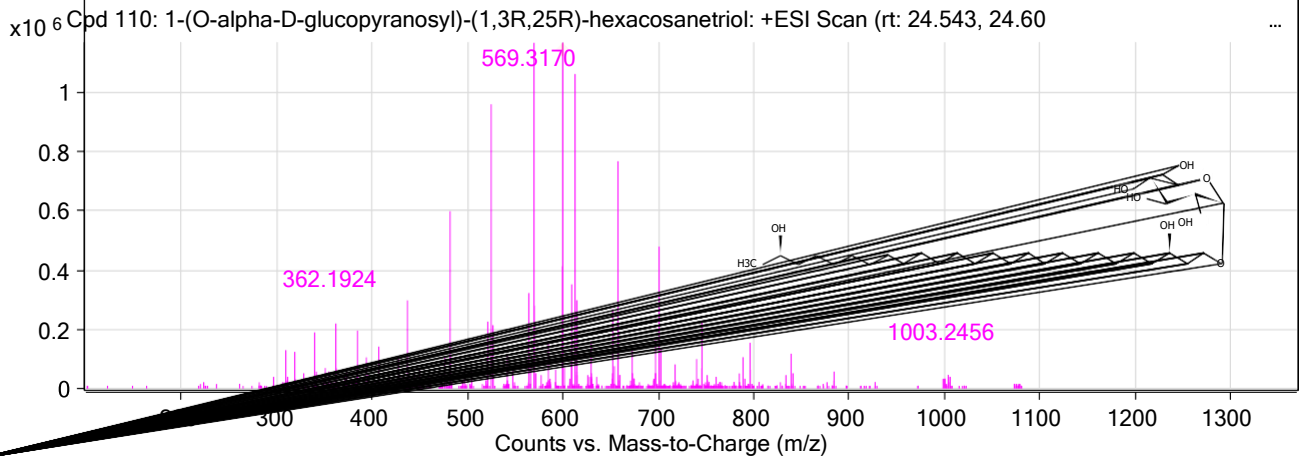

MS Zoomed Spectrum

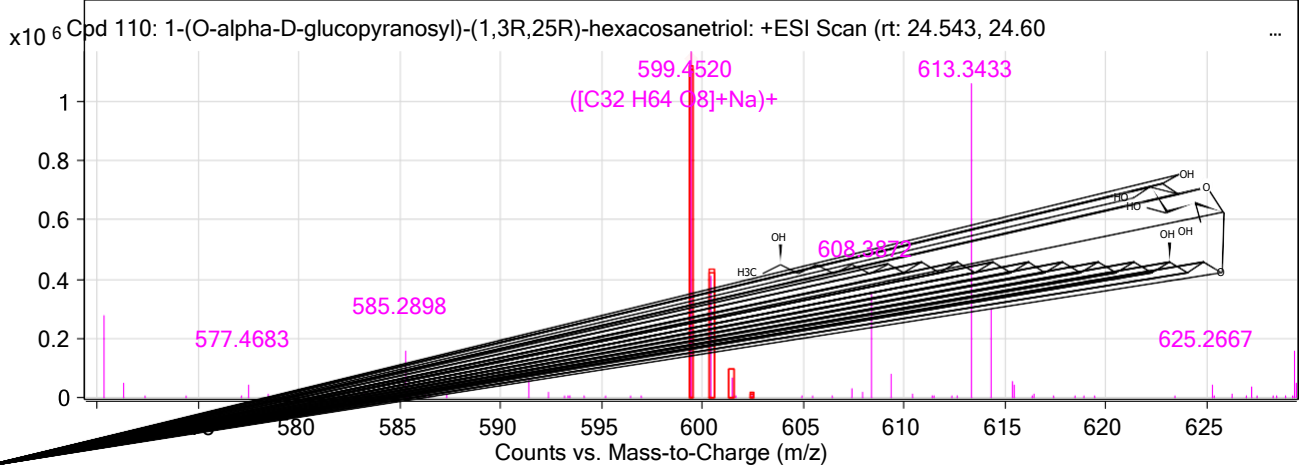

MS Spectrum Peak List

| m/z      | Calc m/z | Diff(ppm) | z | Abund      | Formula    | Ion     |
|----------|----------|-----------|---|------------|------------|---------|
| 481.2636 |          |           | 1 | 597286.75  |            |         |
| 525.2905 |          |           | 1 | 957289.13  |            |         |
| 569.317  |          |           | 1 | 1185430.88 |            |         |
| 599.452  | 599.4493 | -4.42     | 1 | 1167293.75 | C32 H64 O8 | (M+Na)+ |
| 600.4549 | 600.4528 | -3.59     | 1 | 407795.91  | C32 H64 O8 | (M+Na)+ |
| 601.457  | 601.4556 | -2.19     | 1 | 68369.09   | C32 H64 O8 | (M+Na)+ |
| 602.4595 | 602.4584 | -1.83     | 1 | 8401.43    | C32 H64 O8 | (M+Na)+ |
| 613.3433 |          |           | 1 | 1060815.88 |            |         |
| 657.3699 |          |           | 1 | 766827.63  |            |         |
| 701.3954 |          |           | 1 | 477852.44  |            |         |

MSMS Spectrum

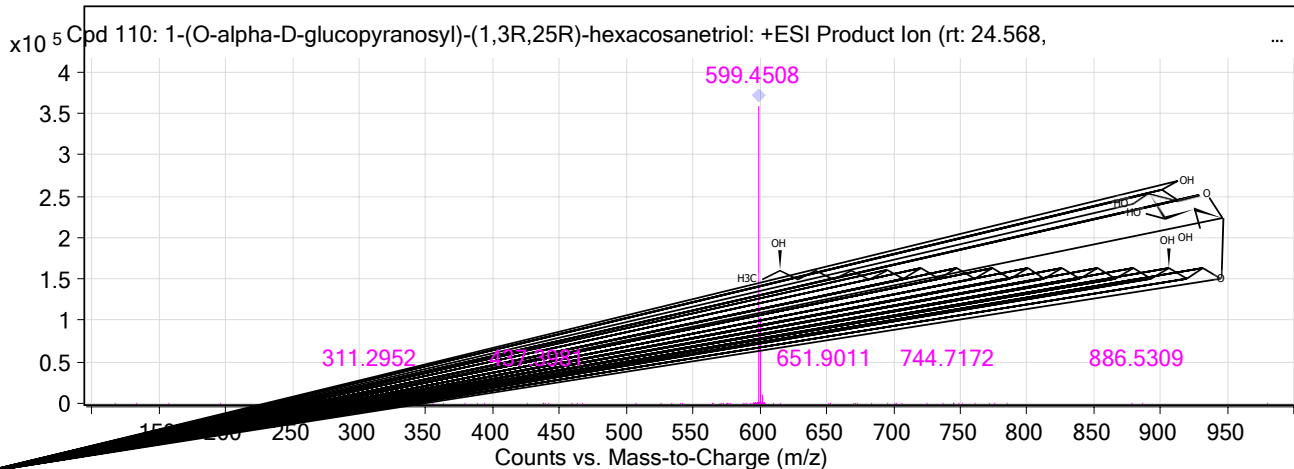

**MS/MS Spectrum Peak List**

| m/z      | Calc m/z | Diff(ppm) | z | Abund     |
|----------|----------|-----------|---|-----------|
| 117.0908 | 117.091  | 1.93      |   | 29.32     |
| 133.0872 | 133.0859 | -9.68     |   | 38.12     |
| 157.1221 | 157.1223 | 1.11      |   | 19.93     |
| 311.2952 | 311.2945 | -2.42     |   | 50.19     |
| 320.2257 | 320.2193 | -19.96    |   | 21.84     |
| 425.2609 | 425.2534 | -17.74    |   | 21.33     |
| 437.3981 | 437.3989 | 1.77      | 1 | 68.94     |
| 597.4315 | 597.4361 | 7.7       |   | 19.78     |
| 599.4508 | 599.4517 | 1.62      | 1 | 358881.88 |
| 600.4537 |          |           | 1 | 103390.81 |

**Compound Structure**

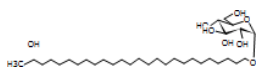

| Compound Label       | m/z     | RT     | Algorithm  | Mass     |
|----------------------|---------|--------|------------|----------|
| Cpd 111: C26 H48 O13 | 569.317 | 24.635 | Auto MS/MS | 568.3095 |

**Compound Chromatograms**

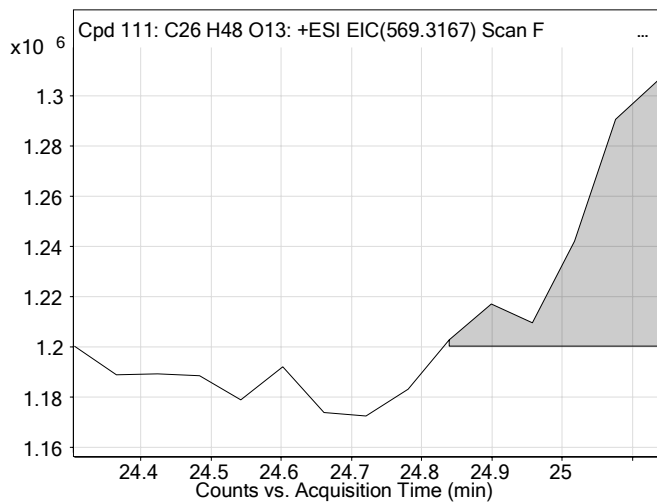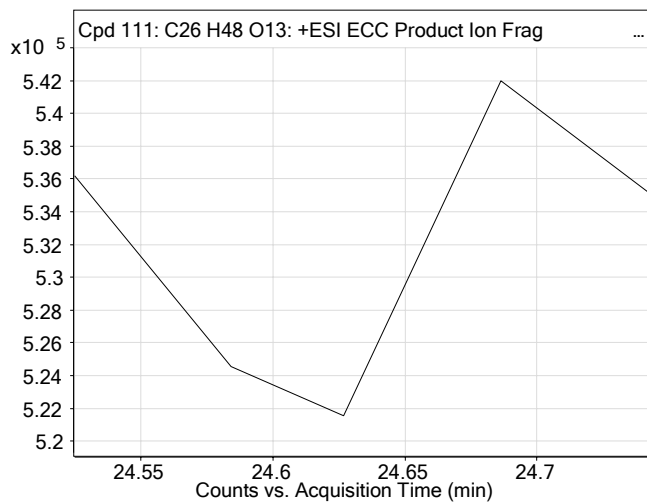

MS Spectrum

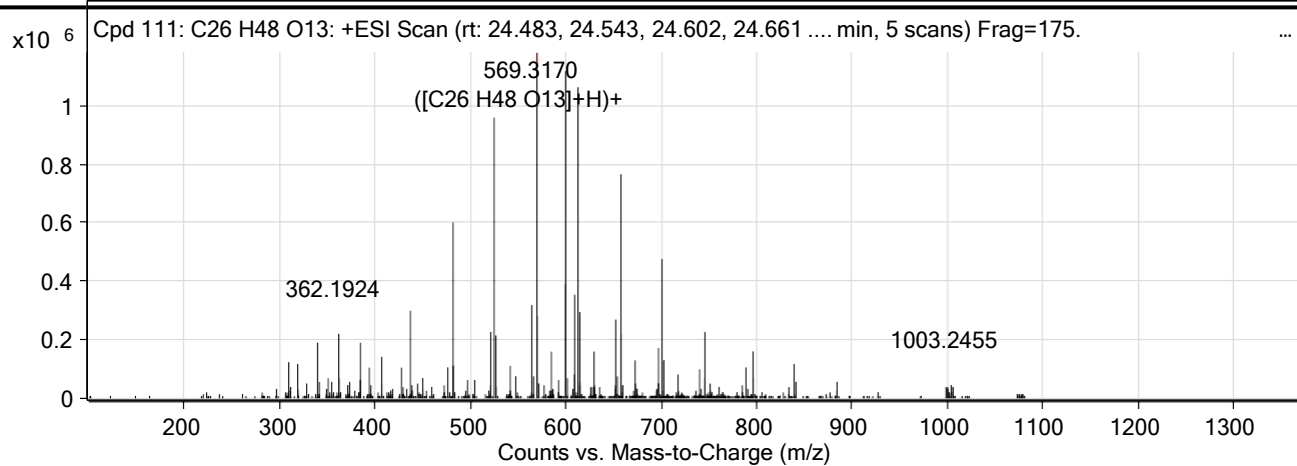

MS Zoomed Spectrum

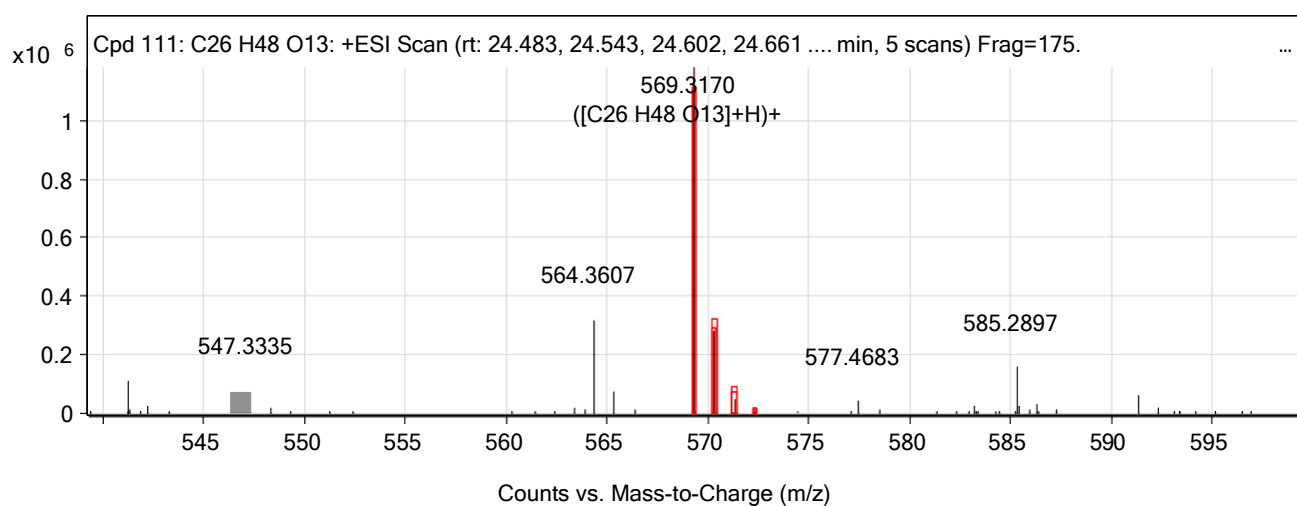

MS Spectrum Peak List

| m/z      | Calc m/z | Diff(ppm) | z | Abund      | Formula                                         | Ion    |
|----------|----------|-----------|---|------------|-------------------------------------------------|--------|
| 481.2635 |          |           | 1 | 596426.63  |                                                 |        |
| 525.2904 |          |           | 1 | 954790     |                                                 |        |
| 569.317  | 569.3168 | -0.37     | 1 | 1181147.75 | C <sub>26</sub> H <sub>48</sub> O <sub>13</sub> | (M+H)+ |
| 570.3194 | 570.3202 | 1.38      | 1 | 277598.38  | C <sub>26</sub> H <sub>48</sub> O <sub>13</sub> | (M+H)+ |
| 571.3214 | 571.3226 | 2.13      | 1 | 47555.25   | C <sub>26</sub> H <sub>48</sub> O <sub>13</sub> | (M+H)+ |
| 572.3245 | 572.3253 | 1.45      | 1 | 6526.93    | C <sub>26</sub> H <sub>48</sub> O <sub>13</sub> | (M+H)+ |
| 599.452  |          |           | 1 | 1113898    |                                                 |        |
| 613.3432 |          |           | 1 | 1058206.63 |                                                 |        |
| 657.3698 |          |           | 1 | 763278.81  |                                                 |        |
| 701.3953 |          |           | 1 | 476090.5   |                                                 |        |

MSMS Spectrum

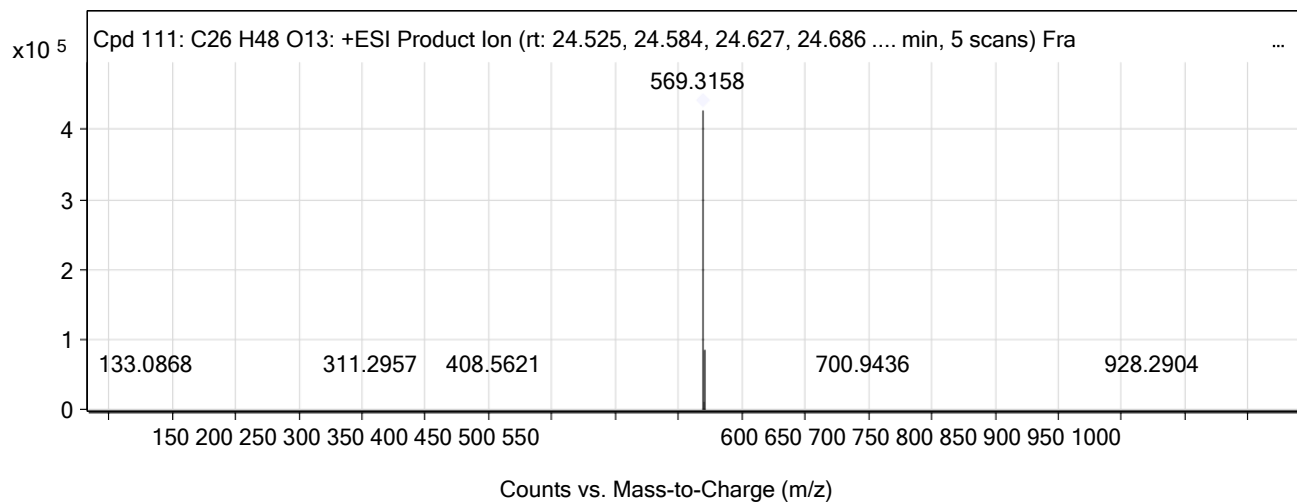

**MS/MS Spectrum Peak List**

| m/z      | Calc m/z | Diff(ppm) | z | Abund     |
|----------|----------|-----------|---|-----------|
| 133.0868 | 133.0859 | -6.94     |   | 44.33     |
| 232.1318 | 232.1305 | -5.6      |   | 15.01     |
| 283.2643 | 283.2632 | -3.95     |   | 12.28     |
| 307.2114 | 307.2115 | 0.46      |   | 12.09     |
| 309.2803 | 309.2788 | -4.98     |   | 25.96     |
| 311.2957 | 311.2945 | -3.95     |   | 59.82     |
| 496.2799 | 496.2878 | 15.95     |   | 14.71     |
| 538.2985 | 538.2984 | -0.17     |   | 26.12     |
| 539.3004 | 539.3062 | 10.75     |   | 27.35     |
| 569.3158 | 569.3168 | 1.63      | 1 | 427114.34 |

| Compound Label       | m/z      | RT     | Algorithm  | Mass     |
|----------------------|----------|--------|------------|----------|
| Cpd 112: C28 H52 O14 | 613.3433 | 24.821 | Auto MS/MS | 612.3358 |

**Compound Chromatograms**

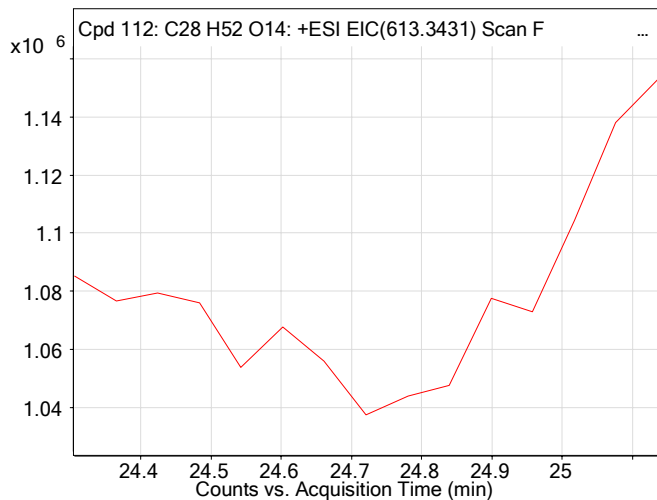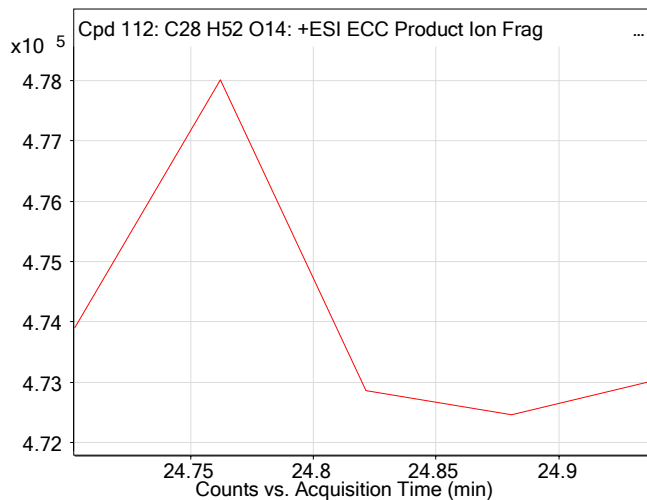

MS Spectrum

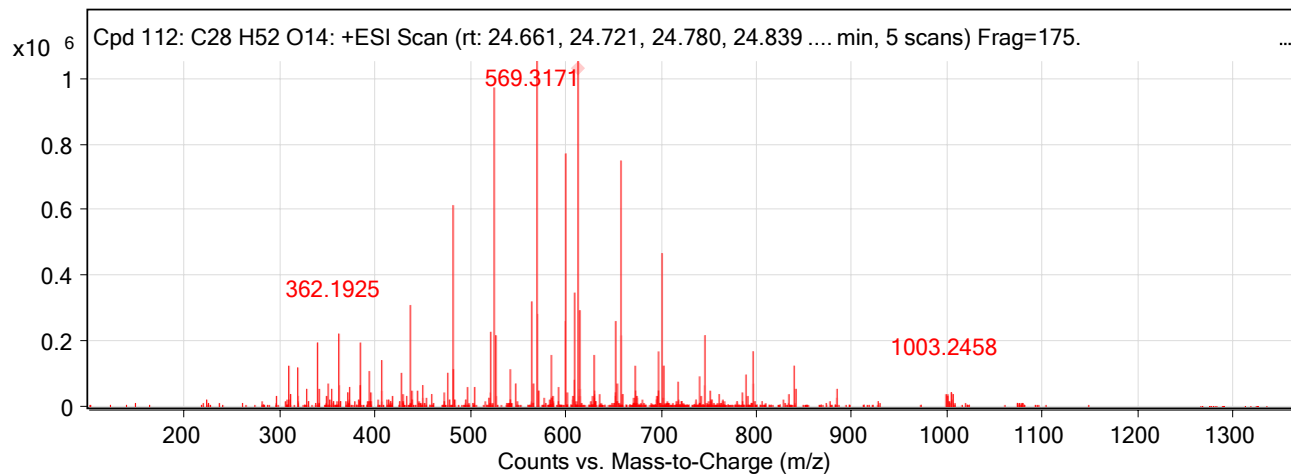

MS Zoomed Spectrum

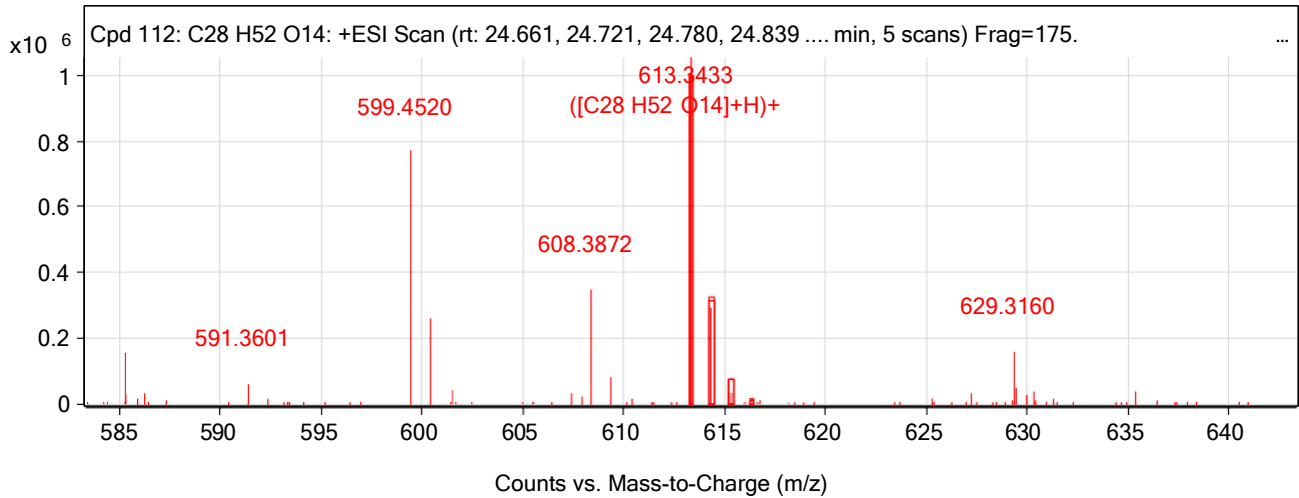

**MS Spectrum Peak List**

| m/z      | Calc m/z | Diff(ppm) | z | Abund      | Formula                                         | Ion    |
|----------|----------|-----------|---|------------|-------------------------------------------------|--------|
| 481.2636 |          |           | 1 | 611477.25  |                                                 |        |
| 525.2905 |          |           | 1 | 970788.38  |                                                 |        |
| 569.3171 |          |           | 1 | 1189866.38 |                                                 |        |
| 599.452  |          |           | 1 | 768206.31  |                                                 |        |
| 613.3433 | 613.343  | -0.5      | 1 | 1052504.13 | C <sub>28</sub> H <sub>52</sub> O <sub>14</sub> | (M+H)+ |
| 614.3459 | 614.3464 | 0.79      | 1 | 291871.13  | C <sub>28</sub> H <sub>52</sub> O <sub>14</sub> | (M+H)+ |
| 615.3478 | 615.3489 | 1.78      | 1 | 51937.61   | C <sub>28</sub> H <sub>52</sub> O <sub>14</sub> | (M+H)+ |
| 616.3519 | 616.3515 | -0.51     | 1 | 7028.24    | C <sub>28</sub> H <sub>52</sub> O <sub>14</sub> | (M+H)+ |
| 657.3698 |          |           | 1 | 748945.88  |                                                 |        |
| 701.3955 |          |           | 1 | 465562.25  |                                                 |        |

MSMS Spectrum

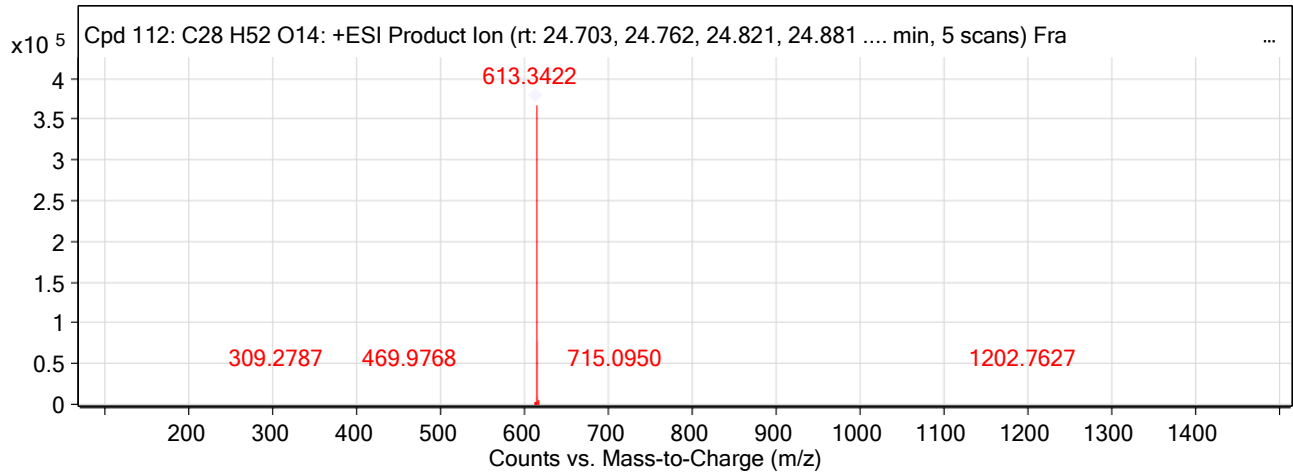

**MS/MS Spectrum Peak List**

| m/z      | Calc m/z | Diff(ppm) | z | Abund     |
|----------|----------|-----------|---|-----------|
| 133.0872 | 133.0859 | -9.57     |   | 39.59     |
| 175.1312 | 175.1329 | 9.54      |   | 16.09     |
| 309.2787 | 309.2788 | 0.38      | 1 | 48.15     |
| 310.2848 |          |           | 1 | 19.66     |
| 311.2953 | 311.2945 | -2.68     |   | 36.1      |
| 312.2972 | 312.3023 | 16.16     |   | 15.84     |
| 589.3356 | 589.343  | 12.61     |   | 18.64     |
| 613.3422 | 613.343  | 1.36      | 1 | 366642.06 |
| 614.3448 |          |           | 1 | 77447.09  |
| 615.3469 |          |           | 1 | 9009.92   |

| Compound Label                                           | m/z      | RT     | Algorithm  | Mass     |
|----------------------------------------------------------|----------|--------|------------|----------|
| Cpd 113: C <sub>26</sub> H <sub>48</sub> O <sub>13</sub> | 569.3169 | 24.923 | Auto MS/MS | 568.3095 |

Compound Chromatograms



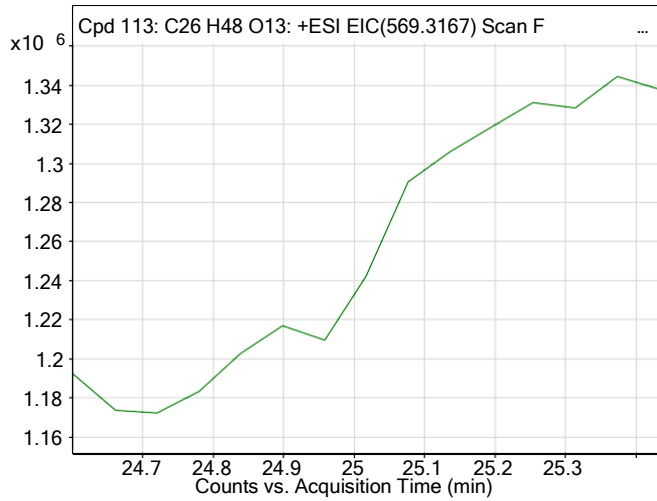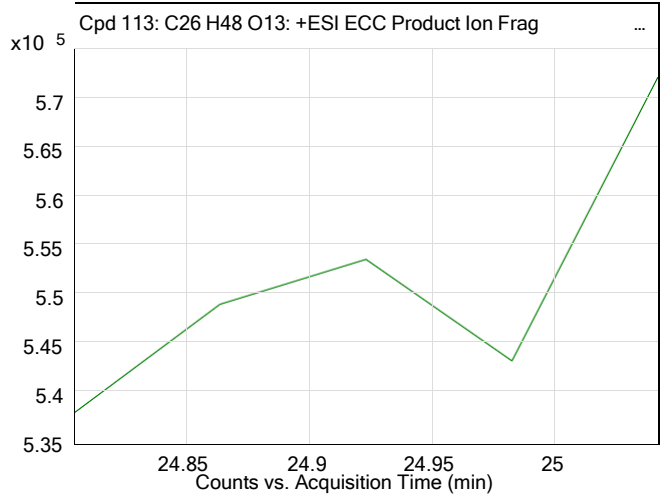

MS Spectrum

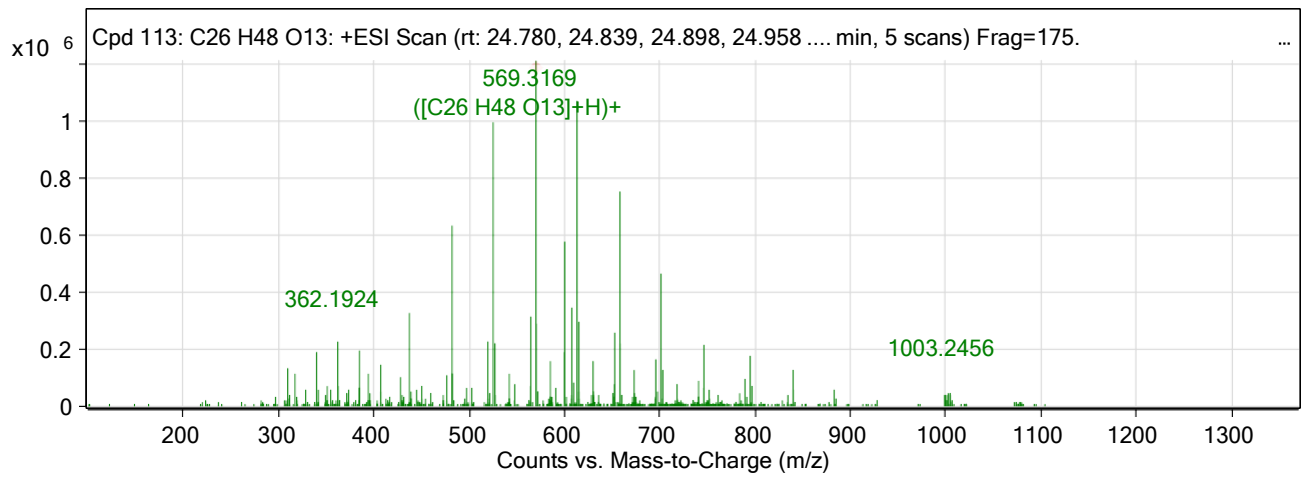

MS Zoomed Spectrum

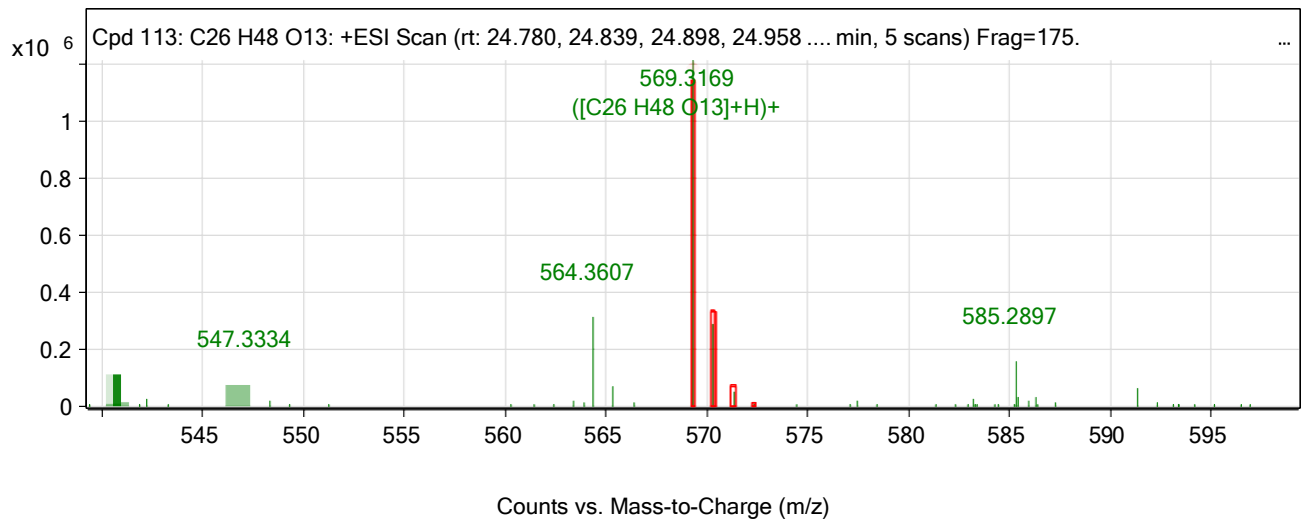

MS Spectrum Peak List

| <i>m/z</i> | Calc <i>m/z</i> | Diff(ppm) | <i>z</i> | Abund      | Formula     | Ion    |
|------------|-----------------|-----------|----------|------------|-------------|--------|
| 481.2635   |                 |           | 1        | 630330.38  |             |        |
| 525.2904   |                 |           | 1        | 995894.19  |             |        |
| 569.3169   | 569.3168        | -0.31     | 1        | 1210979.63 | C26 H48 O13 | (M+H)+ |
| 570.3195   | 570.3202        | 1.29      | 1        | 288643.03  | C26 H48 O13 | (M+H)+ |
| 571.3215   | 571.3226        | 1.97      | 1        | 49471.29   | C26 H48 O13 | (M+H)+ |
| 572.3239   | 572.3253        | 2.41      | 1        | 6738.06    | C26 H48 O13 | (M+H)+ |
| 599.4515   |                 |           | 1        | 572476.81  |             |        |
| 613.3431   |                 |           | 1        | 1069325.5  |             |        |
| 657.3695   |                 |           | 1        | 750678.13  |             |        |

MSMS Spectrum

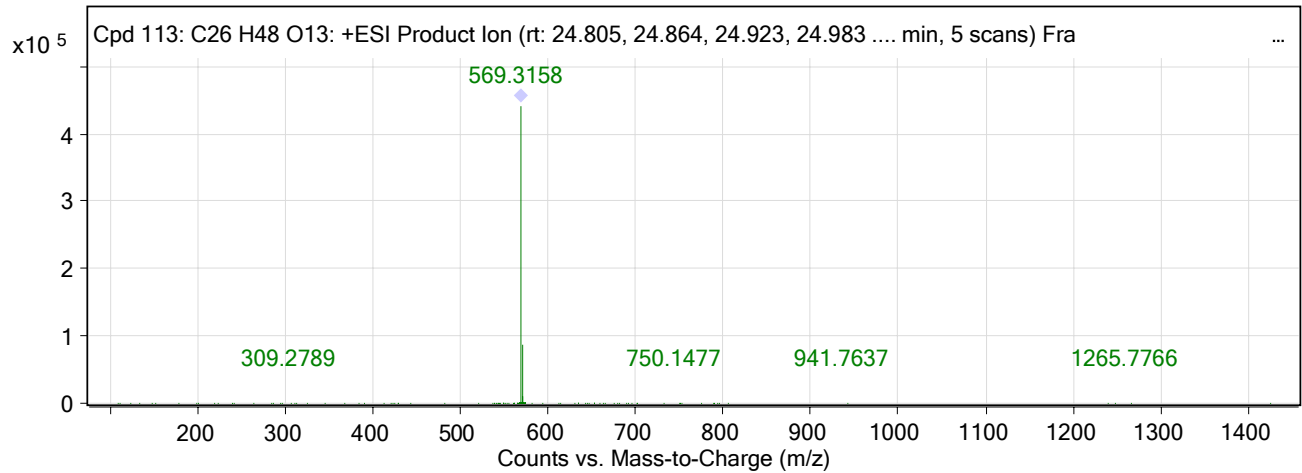

MS/MS Spectrum Peak List

| m/z      | Calc m/z | Diff(ppm) | z | Abund     |
|----------|----------|-----------|---|-----------|
| 133.0857 | 133.0859 | 1.44      |   | 54.25     |
| 309.2789 | 309.2788 | -0.17     |   | 31.51     |
| 538.2932 | 538.2984 | 9.54      |   | 28.58     |
| 539.311  | 539.3062 | -8.94     |   | 21.25     |
| 566.2876 | 283.1464 | -49995.49 | 2 | 22.09     |
| 567.2958 |          |           | 2 | 14.79     |
| 569.3158 | 569.3168 | 1.66      | 1 | 441444.69 |
| 570.3184 |          |           | 1 | 88479.85  |
| 571.3205 |          |           | 1 | 10463.34  |
| 571.3877 |          |           | 2 | 809.09    |

| Compound Label       | m/z     | RT     | Algorithm  | Mass     |
|----------------------|---------|--------|------------|----------|
| Cpd 114: C28 H52 O14 | 613.343 | 25.118 | Auto MS/MS | 612.3355 |

Compound Chromatograms

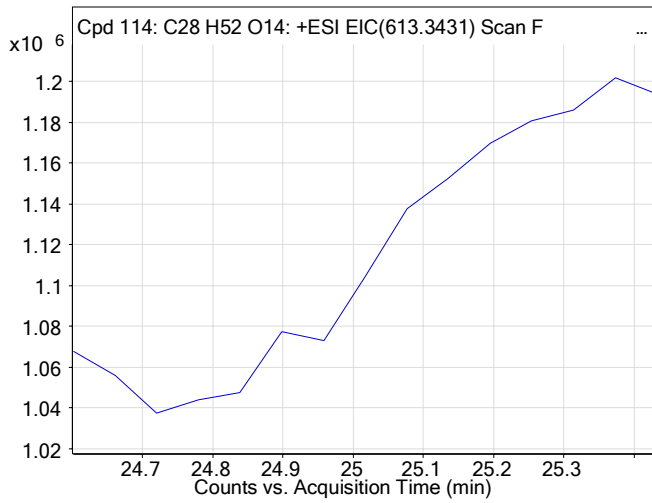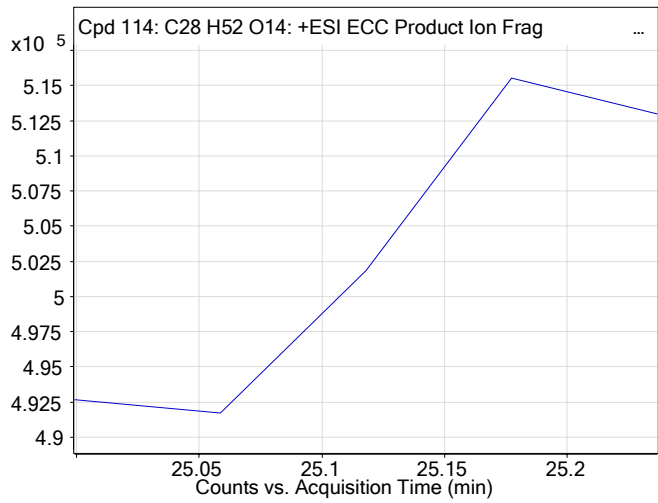

MS Spectrum

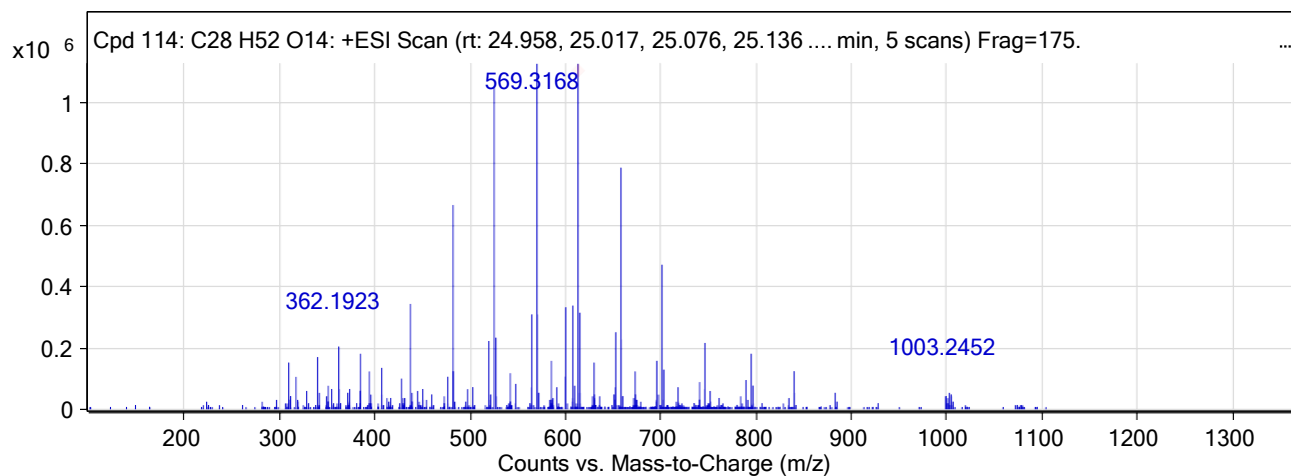

MS Zoomed Spectrum

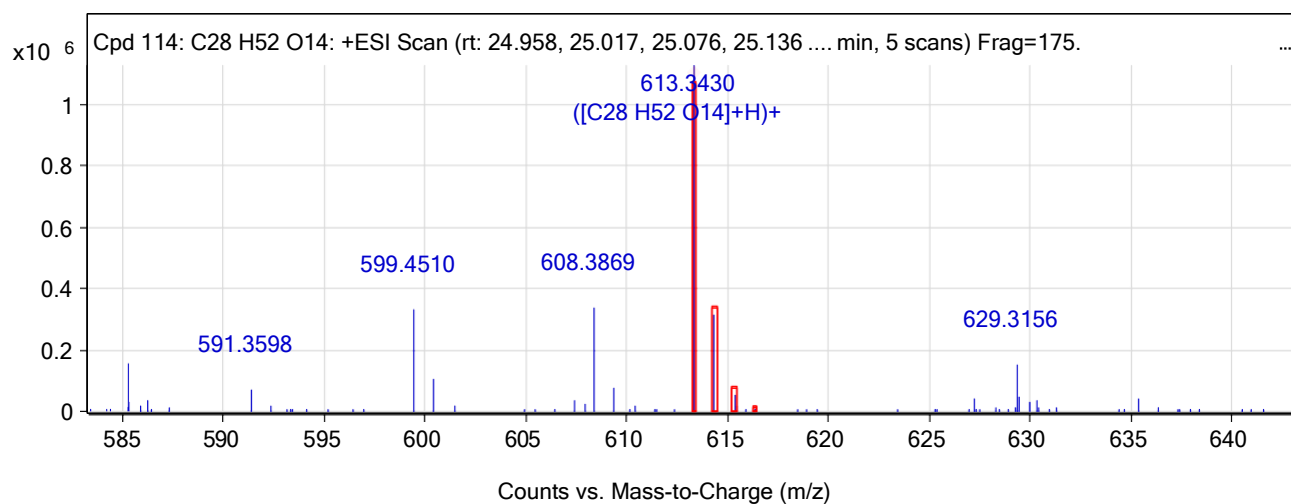

MS Spectrum Peak List

| m/z      | Calc m/z | Diff(ppm) | z | Abund      | Formula                                         | Ion                |
|----------|----------|-----------|---|------------|-------------------------------------------------|--------------------|
| 437.2369 |          |           | 1 | 342799.28  |                                                 |                    |
| 481.2634 |          |           | 1 | 661932.38  |                                                 |                    |
| 525.2902 |          |           | 1 | 1048355.69 |                                                 |                    |
| 569.3168 |          |           | 1 | 1273408.63 |                                                 |                    |
| 613.343  | 613.343  | 0.04      | 1 | 1127644.75 | C <sub>28</sub> H <sub>52</sub> O <sub>14</sub> | (M+H) <sup>+</sup> |
| 614.3456 | 614.3464 | 1.34      | 1 | 312974.06  | C <sub>28</sub> H <sub>52</sub> O <sub>14</sub> | (M+H) <sup>+</sup> |
| 615.3475 | 615.3489 | 2.19      | 1 | 55245.3    | C <sub>28</sub> H <sub>52</sub> O <sub>14</sub> | (M+H) <sup>+</sup> |
| 616.3511 | 616.3515 | 0.75      | 1 | 7672.24    | C <sub>28</sub> H <sub>52</sub> O <sub>14</sub> | (M+H) <sup>+</sup> |
| 657.3692 |          |           | 1 | 787814.63  |                                                 |                    |
| 701.395  |          |           | 1 | 474058.44  |                                                 |                    |

MSMS Spectrum

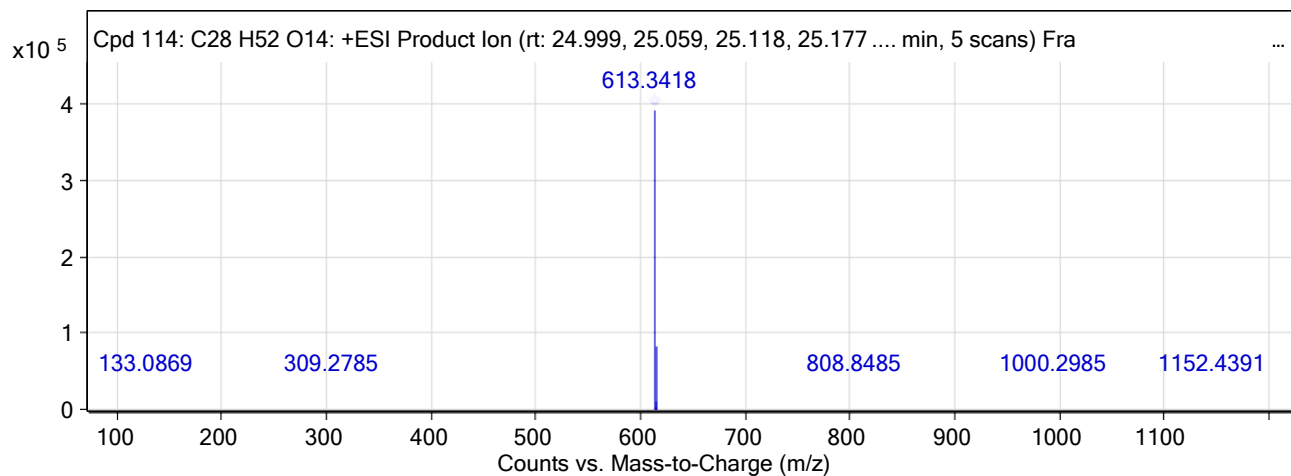

**MS/MS Spectrum Peak List**

| m/z      | Calc m/z | Diff(ppm) | z | Abund     |
|----------|----------|-----------|---|-----------|
| 133.0869 | 133.0859 | -7.63     |   | 20.03     |
| 232.1264 | 232.1305 | 17.96     |   | 19.2      |
| 283.2631 | 283.2632 | 0.35      |   | 18.52     |
| 309.2785 | 309.2788 | 1.03      |   | 63.32     |
| 311.2943 | 311.2945 | 0.43      | 1 | 50.83     |
| 612.6388 |          |           |   | 1256.58   |
| 613.3418 | 613.343  | 1.88      | 1 | 391798.19 |
| 614.3445 |          |           | 1 | 83303.79  |
| 615.3467 |          |           | 1 | 9926.25   |
| 615.4205 |          |           | 2 | 2716.38   |

| Compound Label       | m/z     | RT    | Algorithm  | Mass     |
|----------------------|---------|-------|------------|----------|
| Cpd 115: C26 H48 O13 | 569.317 | 25.22 | Auto MS/MS | 568.3095 |

**Compound Chromatograms**

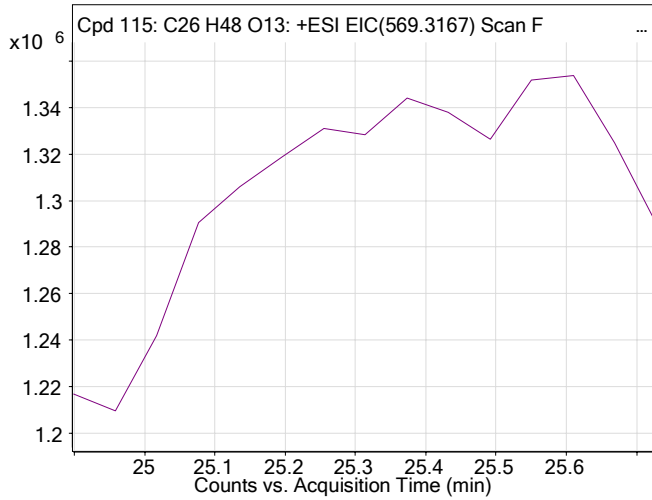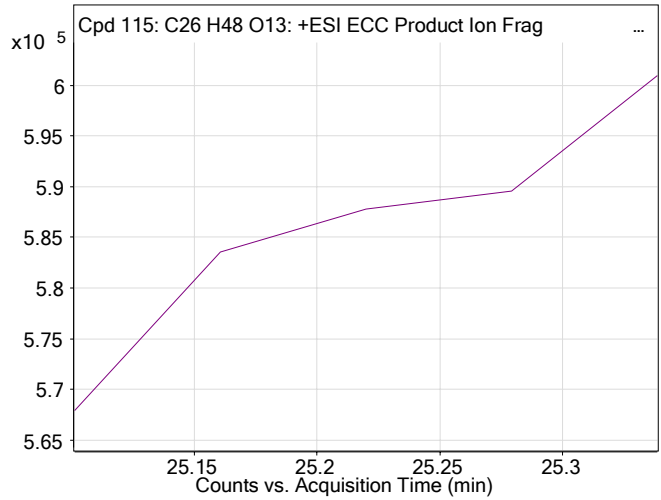

MS Spectrum

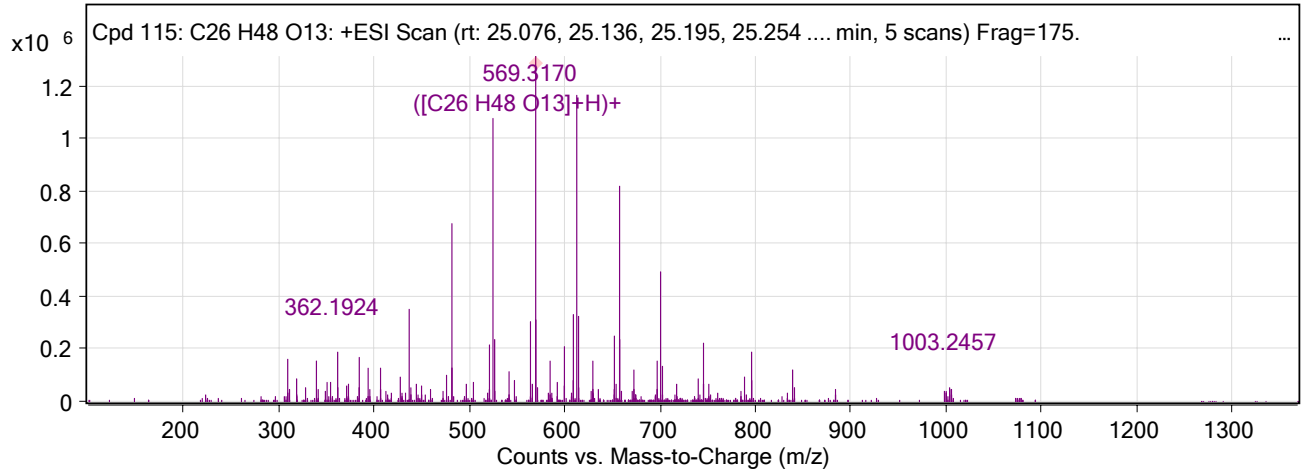

MS Zoomed Spectrum

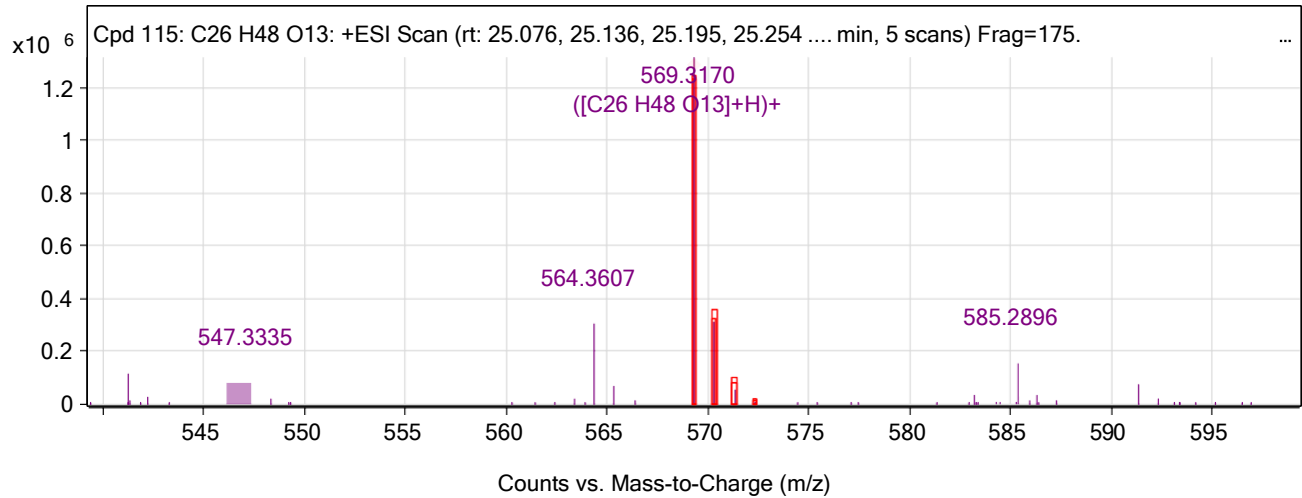

**MS Spectrum Peak List**

| m/z      | Calc m/z | Diff(ppm) | z | Abund      | Formula                                         | Ion    |
|----------|----------|-----------|---|------------|-------------------------------------------------|--------|
| 437.2371 |          |           | 1 | 352291.19  |                                                 |        |
| 481.2635 |          |           | 1 | 675749.13  |                                                 |        |
| 525.2905 |          |           | 1 | 1076950.88 |                                                 |        |
| 569.317  | 569.3168 | -0.37     | 1 | 1314946    | C <sub>26</sub> H <sub>48</sub> O <sub>13</sub> | (M+H)+ |
| 570.3194 | 570.3202 | 1.31      | 1 | 314517.03  | C <sub>26</sub> H <sub>48</sub> O <sub>13</sub> | (M+H)+ |
| 571.3215 | 571.3226 | 2         | 1 | 54123.52   | C <sub>26</sub> H <sub>48</sub> O <sub>13</sub> | (M+H)+ |
| 572.3239 | 572.3253 | 2.38      | 1 | 7230.46    | C <sub>26</sub> H <sub>48</sub> O <sub>13</sub> | (M+H)+ |
| 613.3432 |          |           | 1 | 1165578.25 |                                                 |        |
| 657.3694 |          |           | 1 | 817903.75  |                                                 |        |
| 701.3953 |          |           | 1 | 493260.09  |                                                 |        |

MSMS Spectrum

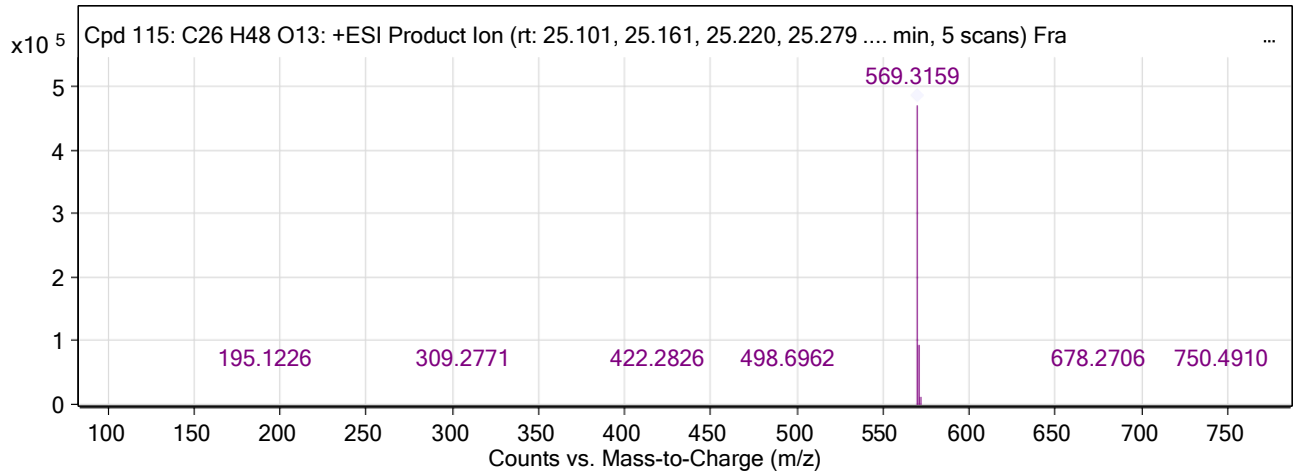

**MS/MS Spectrum Peak List**

| m/z      | Calc m/z | Diff(ppm)  | z | Abund    |
|----------|----------|------------|---|----------|
| 101.0577 | 101.0597 | 20.33      |   | 15.38    |
| 133.0868 | 133.0859 | -6.49      |   | 29.66    |
| 177.1113 | 88.5558  | -499999.24 | 2 | 28.33    |
| 243.1557 | 243.1591 | 13.77      |   | 25.41    |
| 256.1668 | 256.1669 | 0.55       |   | 15.32    |
| 283.2656 | 283.2632 | -8.48      |   | 32.32    |
| 296.1478 | 296.1466 | -4.27      |   | 14.9     |
| 309.2771 | 309.2788 | 5.6        |   | 45.67    |
| 311.2947 | 311.2945 | -0.73      |   | 17.82    |
| 569.3159 | 569.3168 | 1.56       | 1 | 470105.5 |

| Compound Label                                           | m/z      | RT     | Algorithm  | Mass     |
|----------------------------------------------------------|----------|--------|------------|----------|
| Cpd 116: C <sub>28</sub> H <sub>52</sub> O <sub>14</sub> | 613.3437 | 25.414 | Auto MS/MS | 612.3362 |

Compound Chromatograms

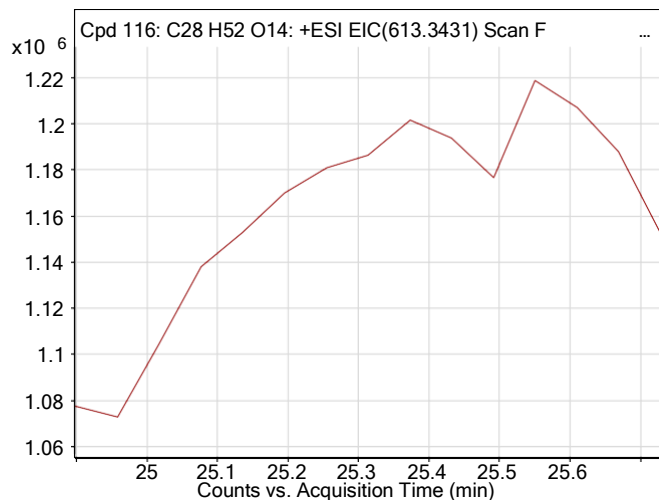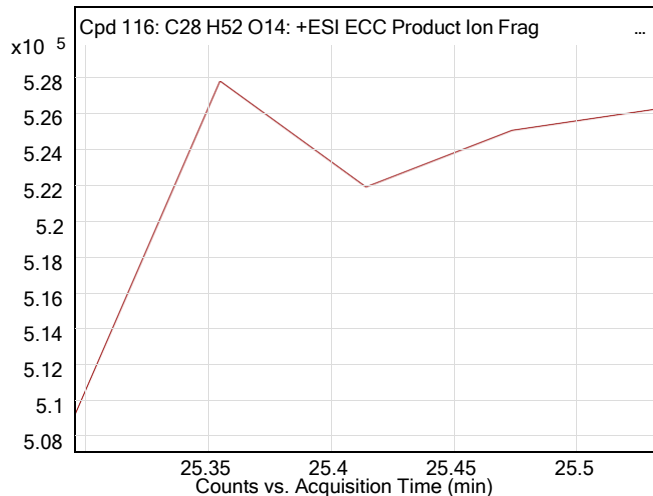

MS Spectrum

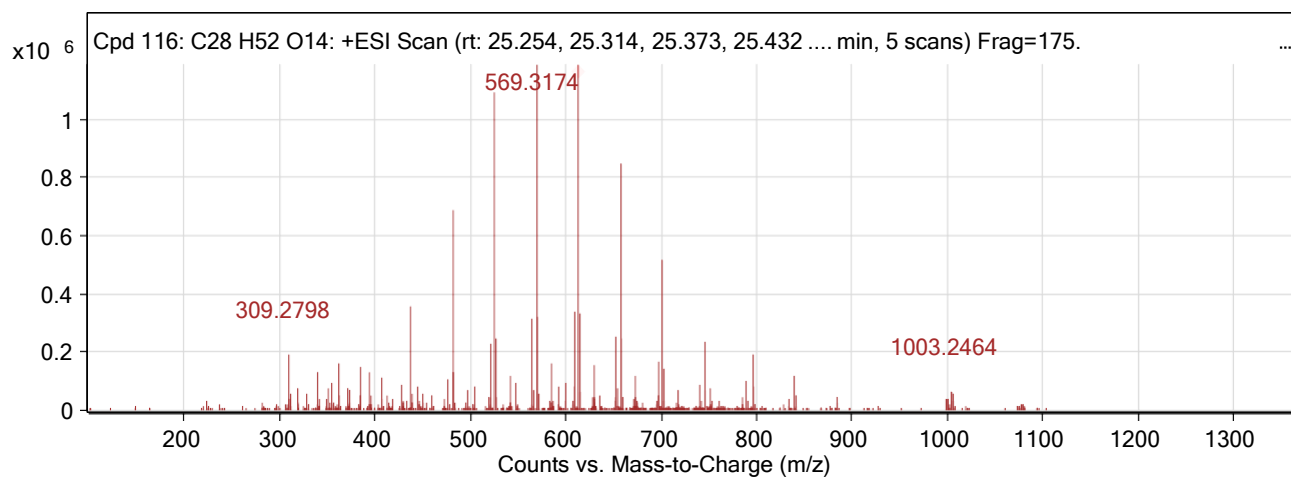

MS Zoomed Spectrum

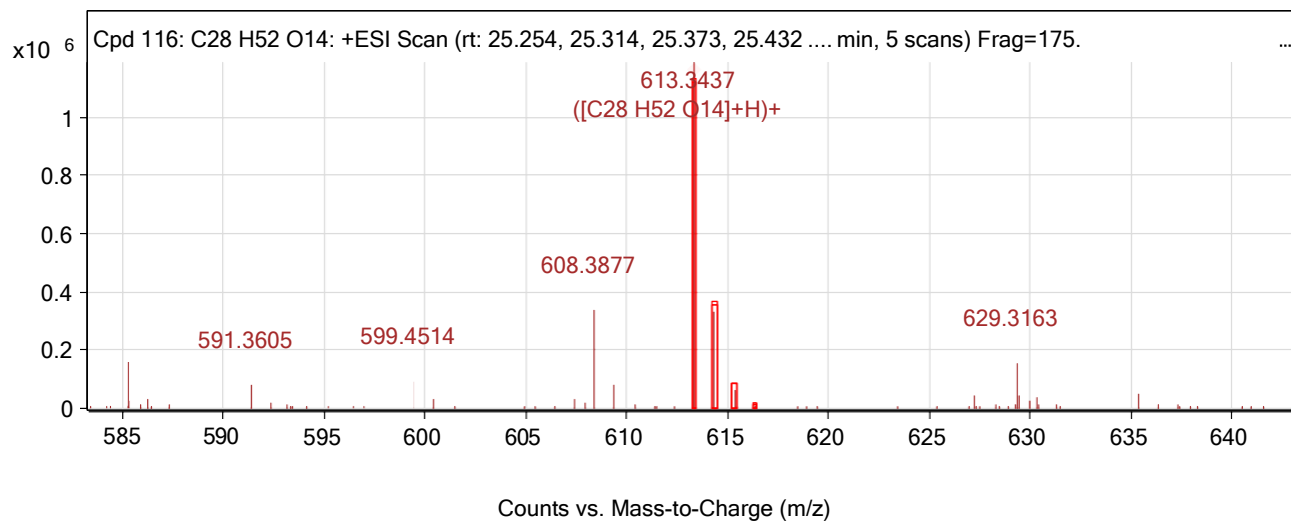

MS Spectrum Peak List

| m/z      | Calc m/z | Diff(ppm) | z | Abund      | Formula     | Ion    |
|----------|----------|-----------|---|------------|-------------|--------|
| 437.2374 |          |           | 1 | 354569.78  |             |        |
| 481.264  |          |           | 1 | 683443.13  |             |        |
| 525.2909 |          |           | 1 | 1088961.38 |             |        |
| 569.3174 |          |           | 1 | 1333679.75 |             |        |
| 613.3437 | 613.343  | -1.22     | 1 | 1187919.75 | C28 H52 O14 | (M+H)+ |
| 614.3464 | 614.3464 | 0.08      | 1 | 332113.06  | C28 H52 O14 | (M+H)+ |
| 615.3482 | 615.3489 | 1.01      | 1 | 59097.24   | C28 H52 O14 | (M+H)+ |
| 616.3513 | 616.3515 | 0.41      | 1 | 7974.69    | C28 H52 O14 | (M+H)+ |
| 657.3699 |          |           | 1 | 846055.13  |             |        |



MSMS Spectrum

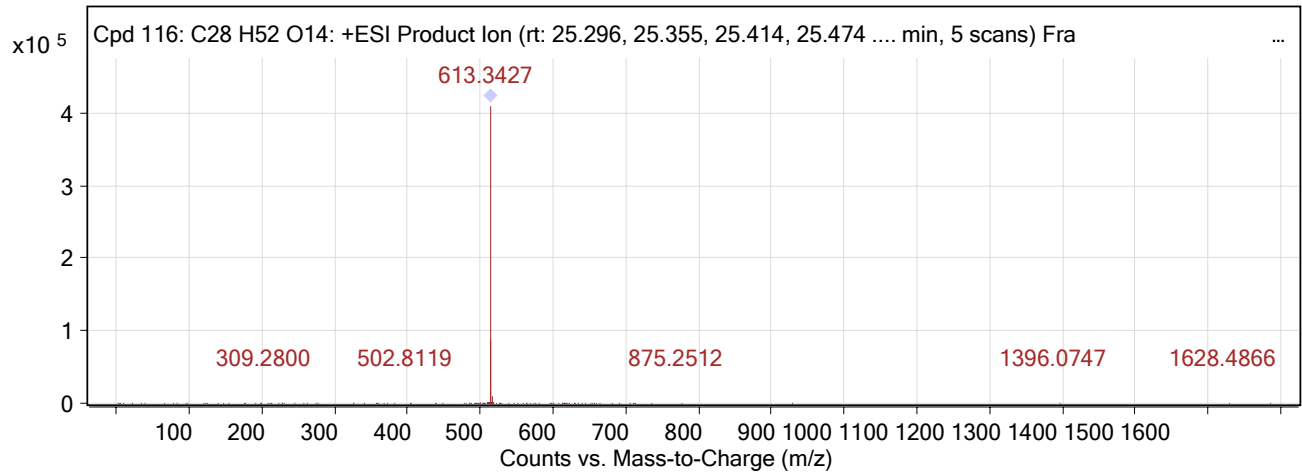

MS/MS Spectrum PeakList

| m/z      | Calc m/z | Diff(ppm)  | z | Abund    |
|----------|----------|------------|---|----------|
| 102.0681 | 102.0675 | -5.65      |   | 13.67    |
| 103.0437 | 103.039  | -45.88     |   | 11.01    |
| 133.0867 | 133.0859 | -6.01      |   | 26.57    |
| 166.1291 | 166.1352 | 37.06      |   | 11.69    |
| 177.1111 | 177.1121 | 5.79       |   | 15.81    |
| 222.9528 | 222.9568 | 17.92      |   | 13.02    |
| 309.28   | 309.2788 | -3.88      |   | 113.76   |
| 311.2947 | 311.2945 | -0.82      | 1 | 76.29    |
| 609.3041 | 304.6556 | -499994.22 | 2 | 102.48   |
| 613.3427 | 613.343  | 0.52       | 1 | 409500.5 |

| Compound Label       | m/z      | RT     | Algorithm  | Mass     |
|----------------------|----------|--------|------------|----------|
| Cpd 117: C26 H48 O13 | 569.3174 | 25.516 | Auto MS/MS | 568.3099 |

Compound Chromatograms

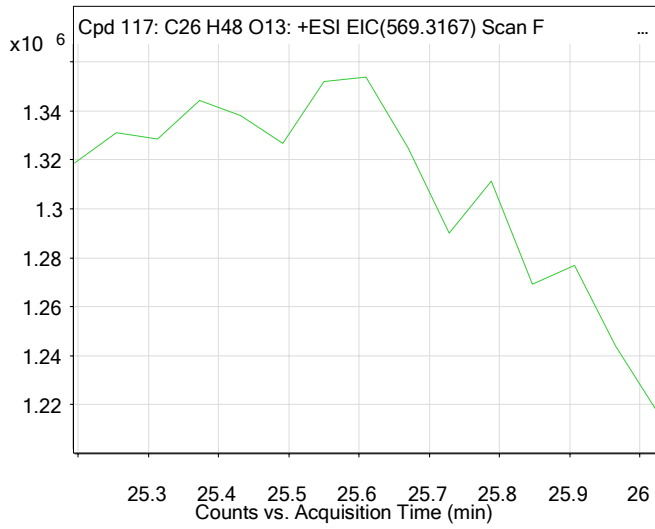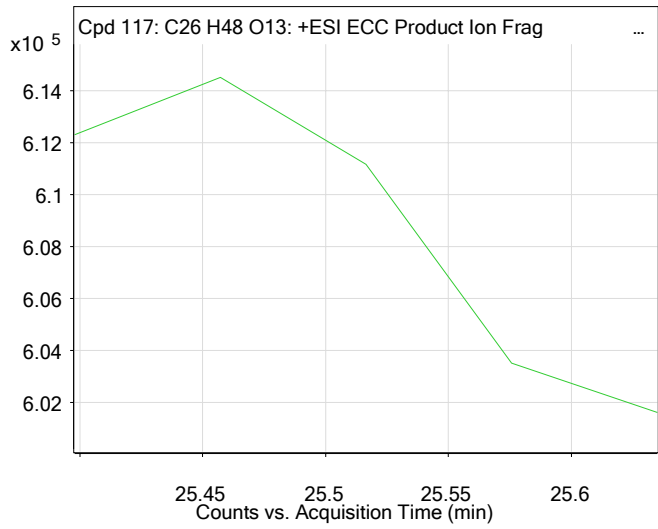

MS Spectrum

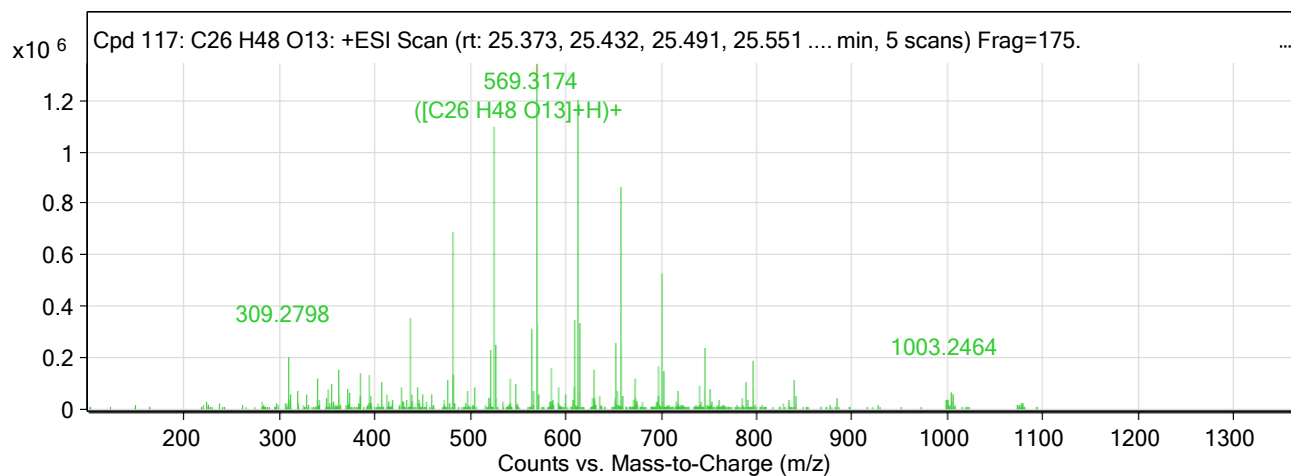

MS Zoomed Spectrum

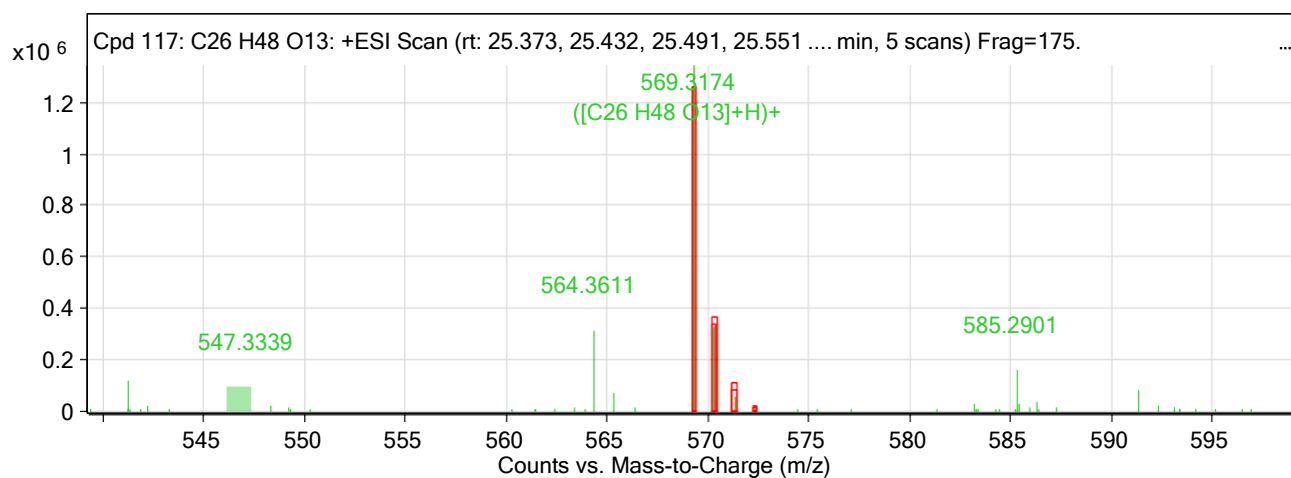

MS Spectrum Peak List

| m/z      | Calc m/z | Diff(ppm) | z | Abund      | Formula                                         | Ion                |
|----------|----------|-----------|---|------------|-------------------------------------------------|--------------------|
| 437.2374 |          |           | 1 | 354562.94  |                                                 |                    |
| 481.264  |          |           | 1 | 683631.38  |                                                 |                    |
| 525.2909 |          |           | 1 | 1095636.88 |                                                 |                    |
| 569.3174 | 569.3168 | -1.1      | 1 | 1342884.13 | C <sub>26</sub> H <sub>48</sub> O <sub>13</sub> | (M+H) <sup>+</sup> |
| 570.3199 | 570.3202 | 0.46      | 1 | 322300.56  | C <sub>26</sub> H <sub>48</sub> O <sub>13</sub> | (M+H) <sup>+</sup> |
| 571.322  | 571.3226 | 1.04      | 1 | 55922.95   | C <sub>26</sub> H <sub>48</sub> O <sub>13</sub> | (M+H) <sup>+</sup> |
| 572.3243 | 572.3253 | 1.7       | 1 | 7129.65    | C <sub>26</sub> H <sub>48</sub> O <sub>13</sub> | (M+H) <sup>+</sup> |
| 613.3436 |          |           | 1 | 1199636.75 |                                                 |                    |
| 657.3699 |          |           | 1 | 857598.31  |                                                 |                    |
| 701.3959 |          |           | 1 | 523610.19  |                                                 |                    |

MSMS Spectrum

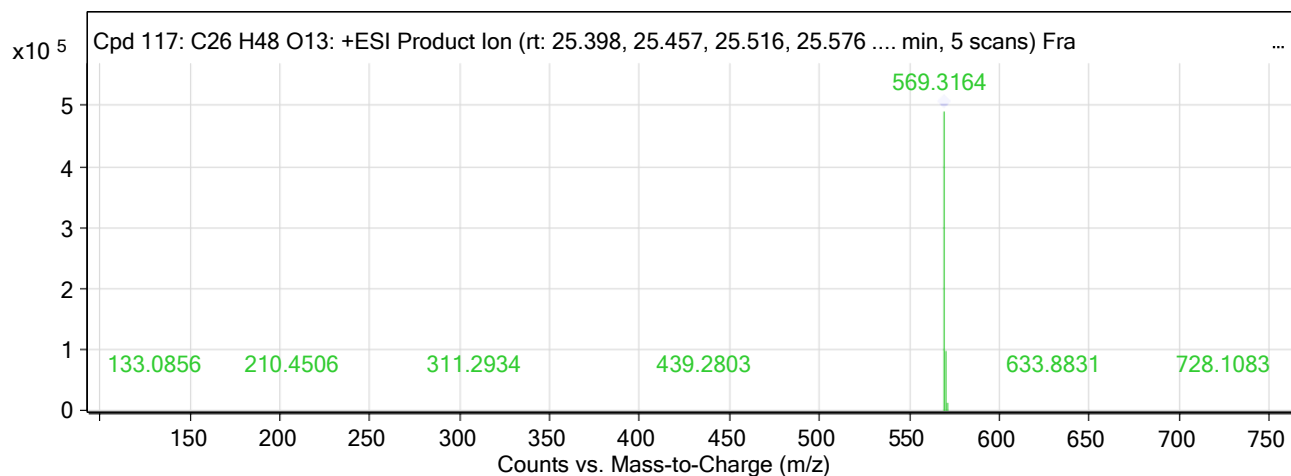

**MS/MS Spectrum Peak List**

| m/z      | Calc m/z | Diff(ppm) | z | Abund     |
|----------|----------|-----------|---|-----------|
| 133.0856 | 133.0859 | 2.67      |   | 76.77     |
| 144.0774 | 144.0781 | 5.14      |   | 19.74     |
| 283.2622 | 283.2632 | 3.52      |   | 35.56     |
| 307.218  | 307.2115 | -21.04    |   | 20.57     |
| 309.2784 | 309.2788 | 1.18      |   | 26.51     |
| 311.2934 | 311.2945 | 3.51      |   | 52.51     |
| 338.2245 | 338.2299 | 16.05     |   | 11.42     |
| 494.279  | 494.2722 | -13.93    |   | 11.16     |
| 545.323  | 545.3168 | -11.39    |   | 12.05     |
| 569.3164 | 569.3168 | 0.72      | 1 | 490164.84 |

| Compound Label       | m/z      | RT     | Algorithm  | Mass     |
|----------------------|----------|--------|------------|----------|
| Cpd 118: C28 H52 O14 | 613.3433 | 25.711 | Auto MS/MS | 612.3359 |

**Compound Chromatograms**

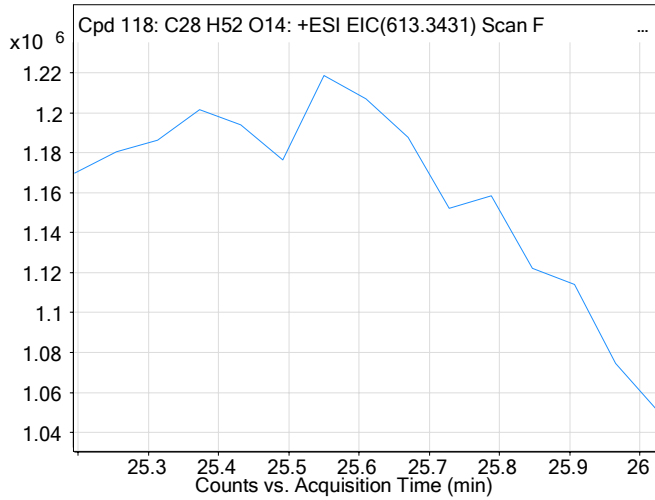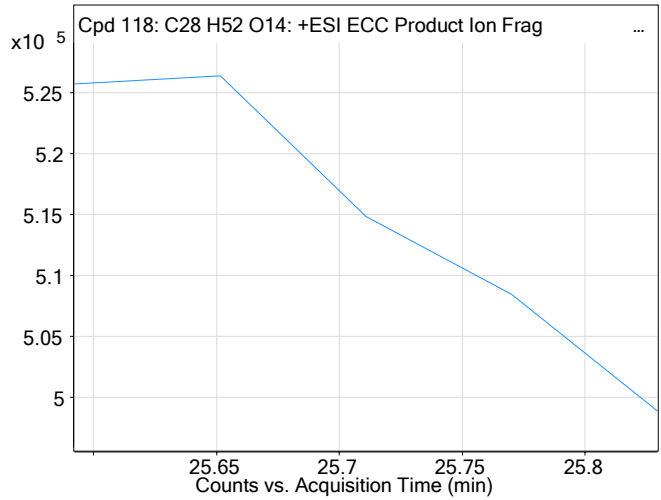

MS Spectrum

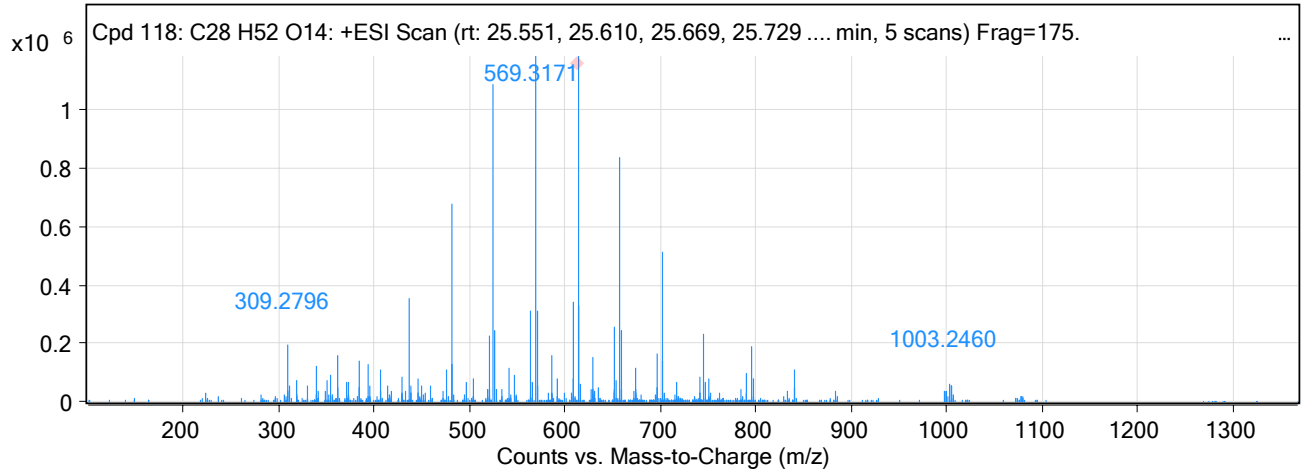

MS Zoomed Spectrum

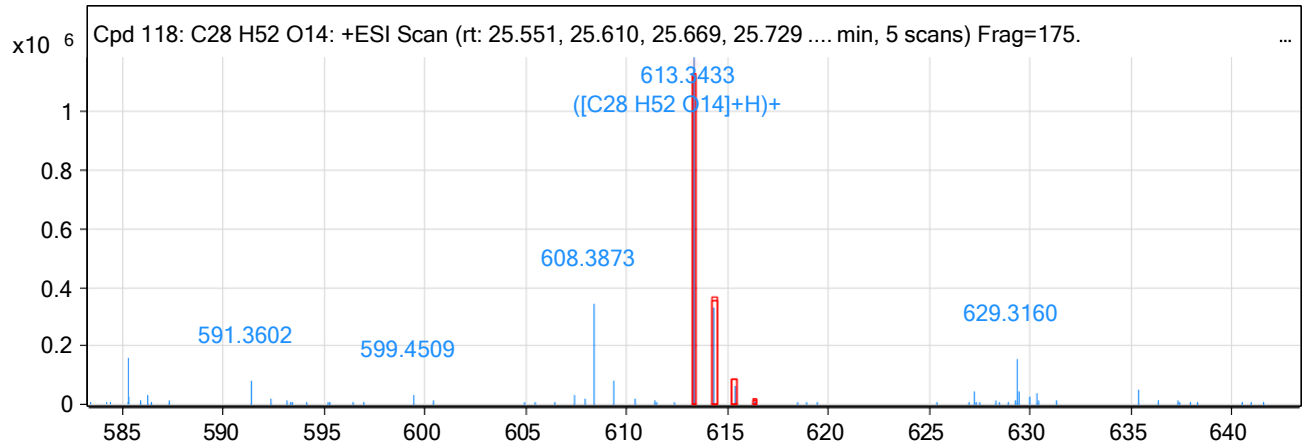

**MS Spectrum Peak List**

| m/z      | Calc m/z | Diff(ppm) | z | Abund      | Formula                                         | Ion                |
|----------|----------|-----------|---|------------|-------------------------------------------------|--------------------|
| 437.2373 |          |           | 1 | 352945.34  |                                                 |                    |
| 481.2638 |          |           | 1 | 675664.25  |                                                 |                    |
| 525.2906 |          |           | 1 | 1087135.38 |                                                 |                    |
| 569.3171 |          |           | 1 | 1326340.38 |                                                 |                    |
| 613.3433 | 613.343  | -0.59     | 1 | 1184993    | C <sub>28</sub> H <sub>52</sub> O <sub>14</sub> | (M+H) <sup>+</sup> |
| 614.3461 | 614.3464 | 0.56      | 1 | 329789.66  | C <sub>28</sub> H <sub>52</sub> O <sub>14</sub> | (M+H) <sup>+</sup> |
| 615.348  | 615.3489 | 1.37      | 1 | 60031.39   | C <sub>28</sub> H <sub>52</sub> O <sub>14</sub> | (M+H) <sup>+</sup> |
| 616.3508 | 616.3515 | 1.18      | 1 | 8159.17    | C <sub>28</sub> H <sub>52</sub> O <sub>14</sub> | (M+H) <sup>+</sup> |
| 657.3696 |          |           | 1 | 839727.19  |                                                 |                    |
| 701.3955 |          |           | 1 | 513441.06  |                                                 |                    |

MSMS Spectrum

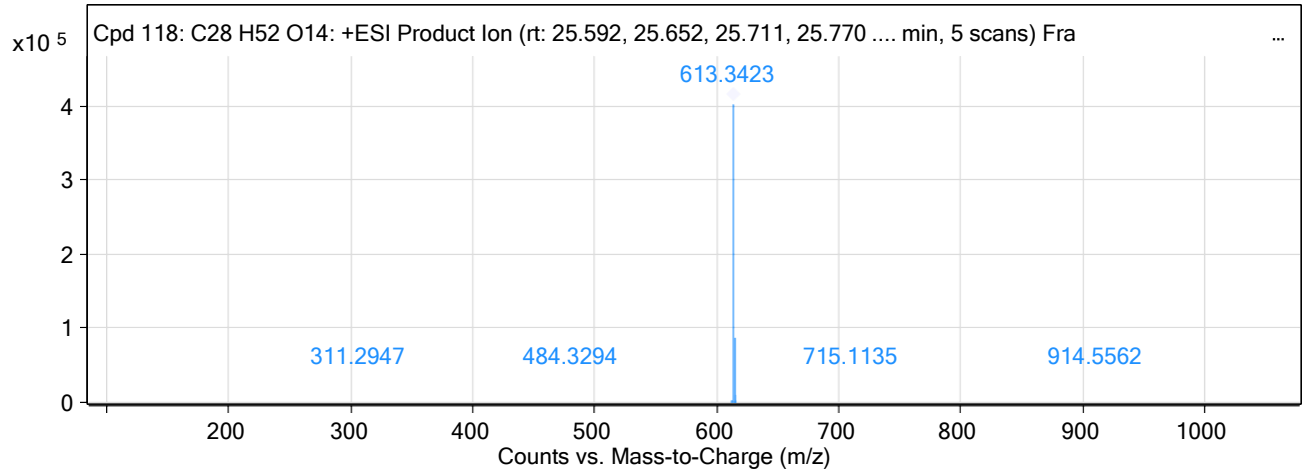

**MS/MS Spectrum Peak List**

| m/z      | Calc m/z | Diff(ppm) | z | Abund     |
|----------|----------|-----------|---|-----------|
| 133.0863 | 133.0859 | -2.69     |   | 65.09     |
| 146.0941 | 146.0937 | -2.42     |   | 12.58     |
| 152.0993 | 152.1043 | 33.12     |   | 12.91     |
| 263.1877 | 263.1853 | -9.24     |   | 12.77     |
| 265.17   | 265.1646 | -20.52    |   | 13.16     |
| 309.2771 | 309.2788 | 5.38      |   | 48.87     |
| 311.2947 | 311.2945 | -0.72     | 1 | 109.95    |
| 357.0632 | 357.0664 | 8.93      |   | 15.24     |
| 560.3487 | 560.3402 | -15.15    |   | 13.22     |
| 613.3423 | 613.343  | 1.14      | 1 | 402697.84 |

| Compound Label                                           | m/z      | RT     | Algorithm  | Mass     |
|----------------------------------------------------------|----------|--------|------------|----------|
| Cpd 119: C <sub>26</sub> H <sub>48</sub> O <sub>13</sub> | 569.3171 | 25.813 | Auto MS/MS | 568.3096 |

**Compound Chromatograms**

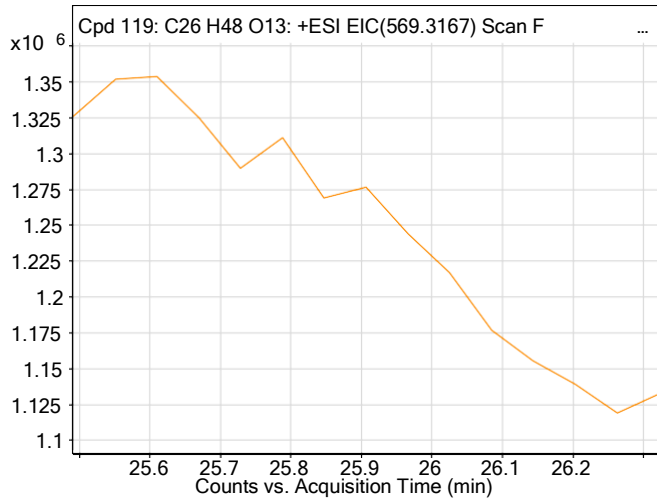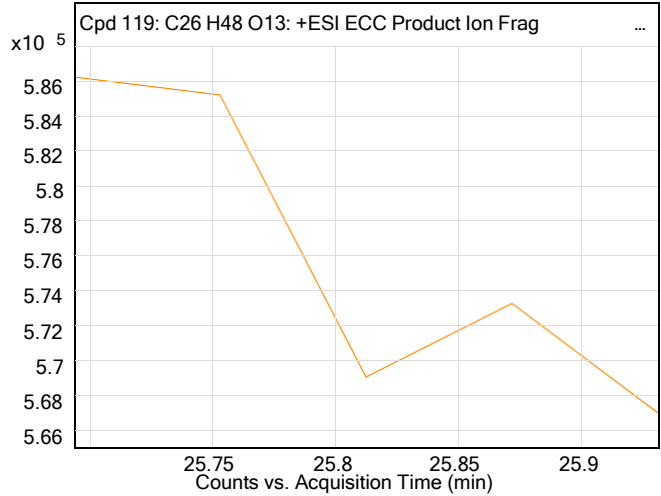

MS Spectrum

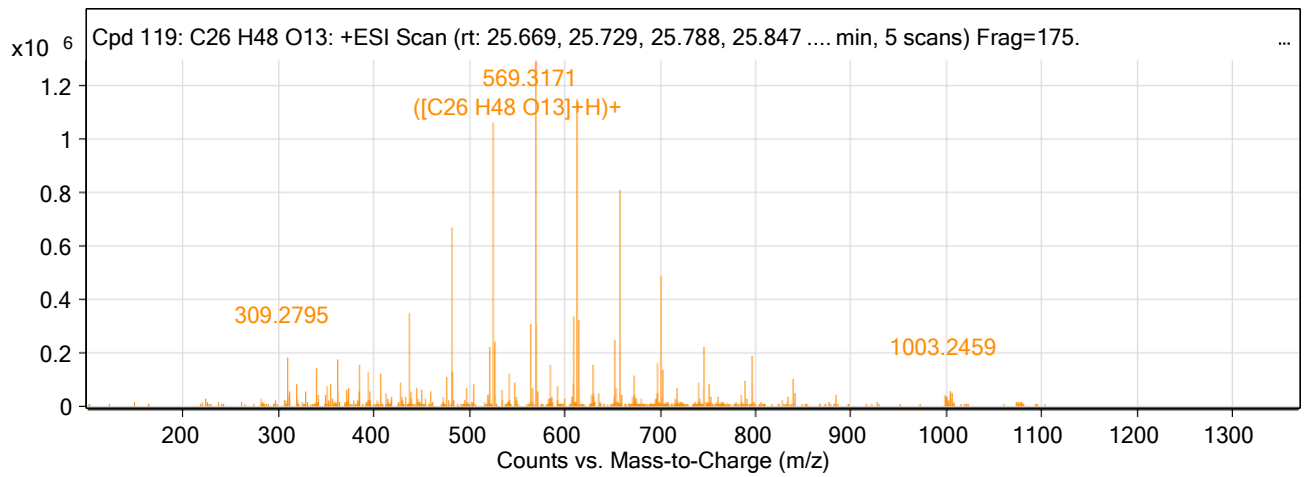

MS Zoomed Spectrum

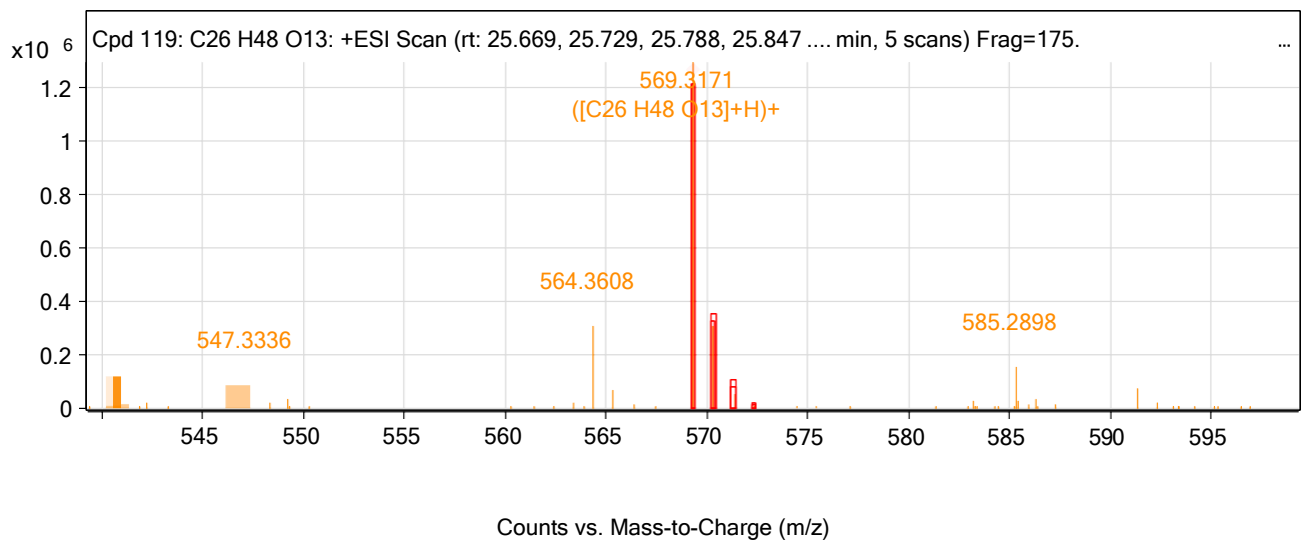

Counts vs. Mass-to-Charge (m/z)

MS Spectrum Peak List

| <i>m/z</i> | Calc <i>m/z</i> | Diff(ppm) | z | Abund      | Formula     | Ion    |
|------------|-----------------|-----------|---|------------|-------------|--------|
| 437.2372   |                 |           | 1 | 350042.69  |             |        |
| 481.2637   |                 |           | 1 | 666751.69  |             |        |
| 525.2906   |                 |           | 1 | 1063187.63 |             |        |
| 569.3171   | 569.3168        | -0.6      | 1 | 1294442.63 | C26 H48 O13 | (M+H)+ |
| 570.3196   | 570.3202        | 1.02      | 1 | 306411.5   | C26 H48 O13 | (M+H)+ |
| 571.3216   | 571.3226        | 1.66      | 1 | 54450.14   | C26 H48 O13 | (M+H)+ |
| 572.3242   | 572.3253        | 1.84      | 1 | 7115.66    | C26 H48 O13 | (M+H)+ |
| 613.3434   |                 |           | 1 | 1147111.25 |             |        |
| 657.3695   |                 |           | 1 | 810197.13  |             |        |

MSMS Spectrum

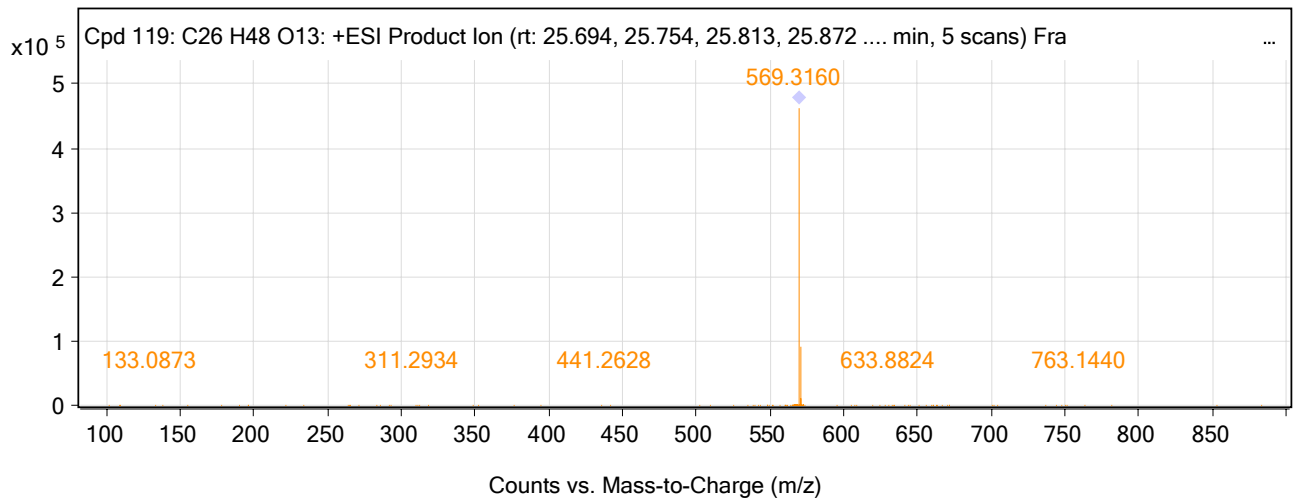

MS/MS Spectrum PeakList

| m/z      | Calc m/z | Diff(ppm) | z | Abund     |
|----------|----------|-----------|---|-----------|
| 133.0873 | 133.0859 | -10.3     |   | 31.91     |
| 177.1117 | 177.1121 | 2.49      |   | 21.71     |
| 190.1223 | 190.12   | -12.36    |   | 11.46     |
| 233.173  | 233.1747 | 7.25      |   | 16.35     |
| 285.2101 | 285.206  | -14.27    |   | 12.18     |
| 291.2124 | 291.2166 | 14.28     |   | 13.8      |
| 309.2802 | 309.2788 | -4.37     |   | 33.06     |
| 311.2934 | 311.2945 | 3.25      |   | 45.59     |
| 441.2628 | 441.2694 | 14.99     |   | 12.61     |
| 569.316  | 569.3168 | 1.4       | 1 | 462977.81 |

| Compound Label       | m/z      | RT     | Algorithm  | Mass     |
|----------------------|----------|--------|------------|----------|
| Cpd 120: C28 H52 O14 | 613.3432 | 26.007 | Auto MS/MS | 612.3357 |

Compound Chromatograms

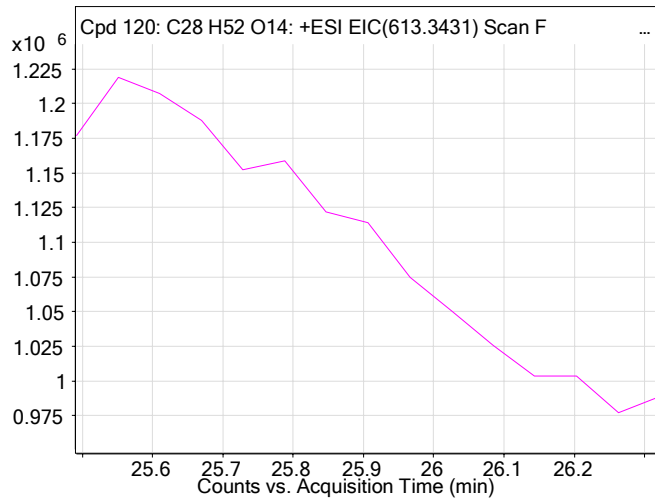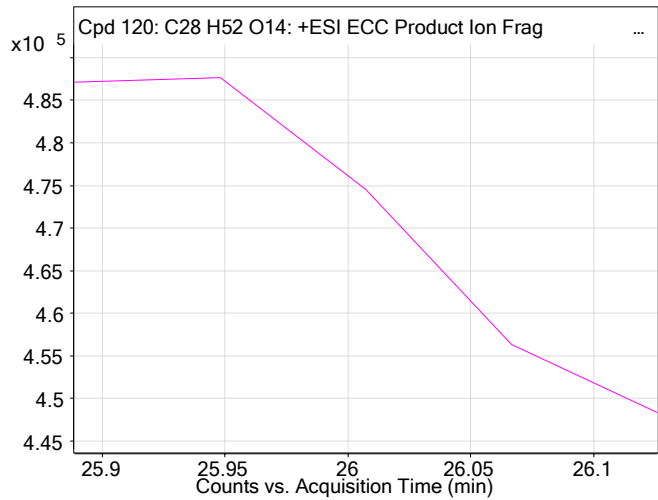

MS Spectrum

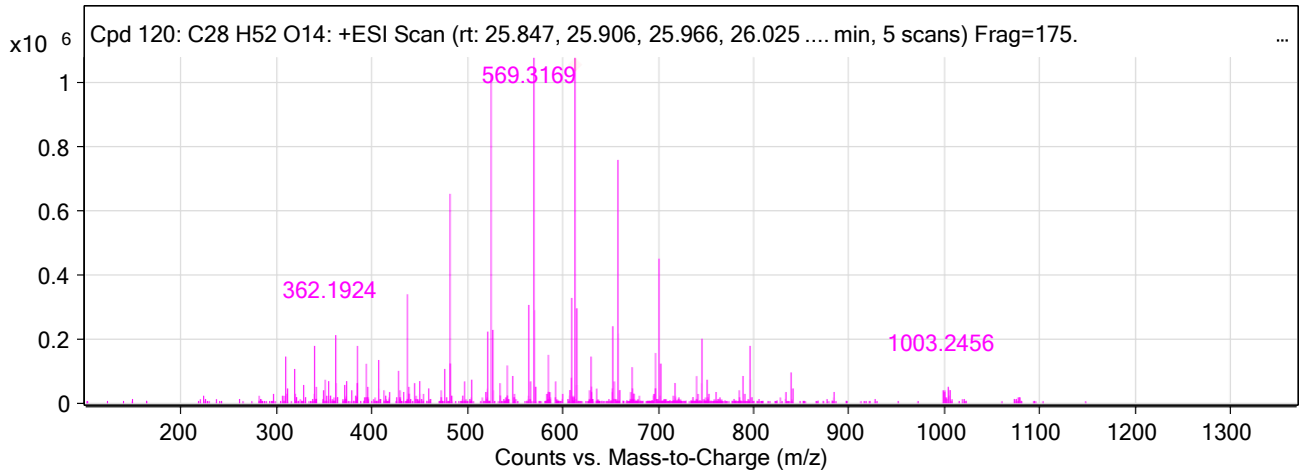

MS Zoomed Spectrum

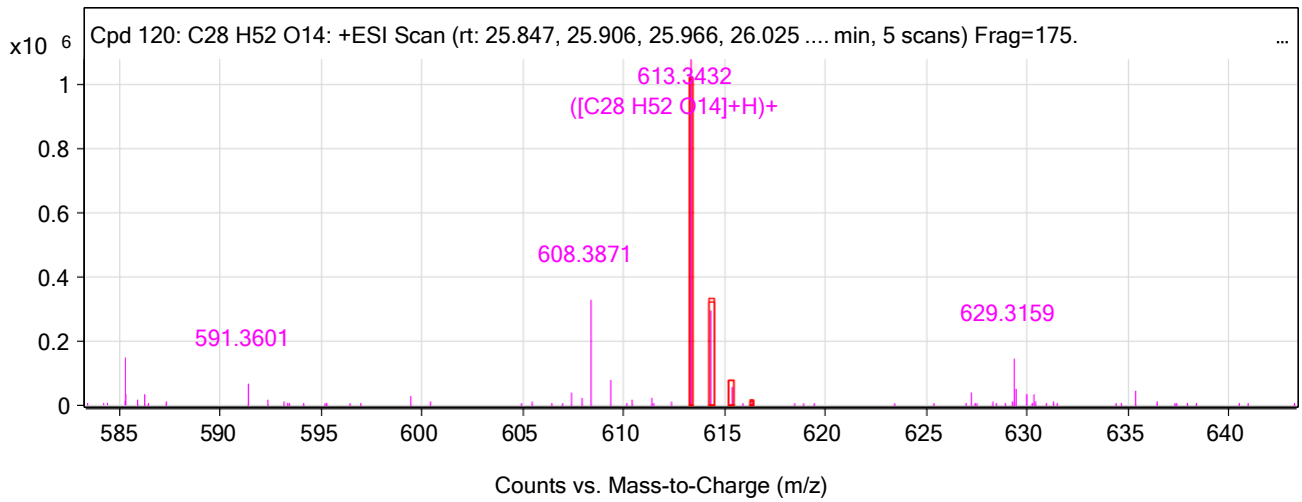

MS Spectrum Peak List

| m/z      | Calc m/z | Diff(ppm) | z | Abund      | Formula                                         | Ion                |
|----------|----------|-----------|---|------------|-------------------------------------------------|--------------------|
| 437.2371 |          |           | 1 | 340249.97  |                                                 |                    |
| 481.2636 |          |           | 1 | 650982.38  |                                                 |                    |
| 525.2905 |          |           | 1 | 1021762    |                                                 |                    |
| 569.3169 |          |           | 1 | 1236800.25 |                                                 |                    |
| 613.3432 | 613.343  | -0.34     | 1 | 1077428.63 | C <sub>28</sub> H <sub>52</sub> O <sub>14</sub> | (M+H) <sup>+</sup> |
| 614.3458 | 614.3464 | 0.99      | 1 | 297382.75  | C <sub>28</sub> H <sub>52</sub> O <sub>14</sub> | (M+H) <sup>+</sup> |
| 615.3477 | 615.3489 | 1.83      | 1 | 54056.3    | C <sub>28</sub> H <sub>52</sub> O <sub>14</sub> | (M+H) <sup>+</sup> |
| 616.351  | 616.3515 | 0.81      | 1 | 7180.11    | C <sub>28</sub> H <sub>52</sub> O <sub>14</sub> | (M+H) <sup>+</sup> |
| 657.3693 |          |           | 1 | 754913.56  |                                                 |                    |
| 701.3953 |          |           | 1 | 449836     |                                                 |                    |

MSMS Spectrum

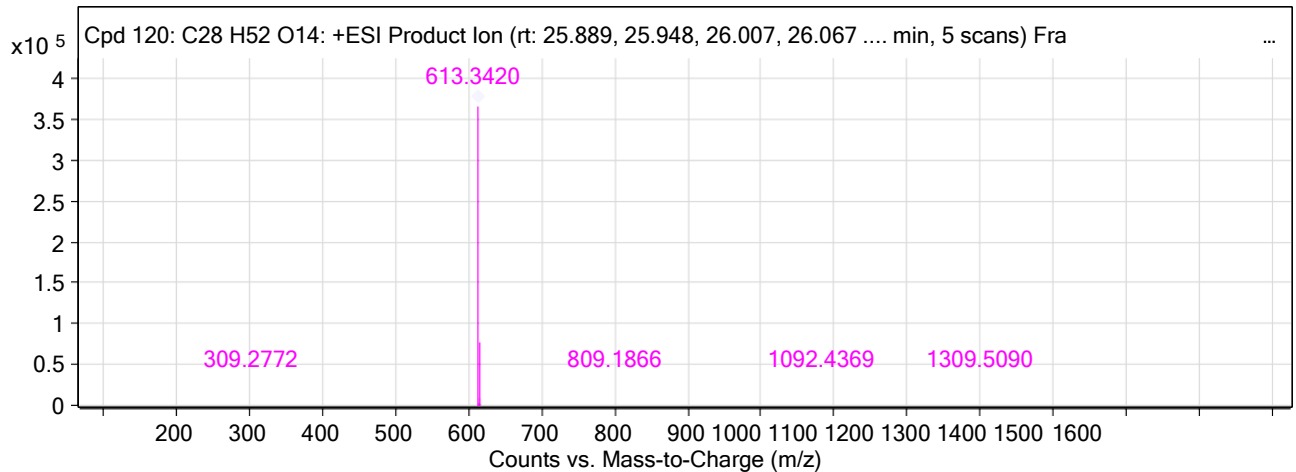



**MS/MS Spectrum Peak List**

| m/z      | Calc m/z | Diff(ppm) | z | Abund     |
|----------|----------|-----------|---|-----------|
| 133.0862 | 133.0859 | -2.42     | 1 | 25.74     |
| 198.1983 | 198.1978 | -2.39     | 1 | 21.44     |
| 274.2134 | 274.2139 | 1.52      | 1 | 15.43     |
| 309.2772 | 309.2788 | 5.27      | 1 | 69.37     |
| 357.0665 | 357.0664 | -0.41     | 1 | 35.3      |
| 612.3938 |          |           | 2 | 2640.78   |
| 613.342  | 613.343  | 1.66      | 1 | 365777.06 |
| 614.3446 |          |           | 1 | 76742.71  |
| 615.3467 |          |           | 1 | 9115.77   |
| 615.4169 |          |           | 2 | 1815.31   |

| Compound Label       | m/z     | RT     | Algorithm  | Mass     |
|----------------------|---------|--------|------------|----------|
| Cpd 121: C26 H48 O13 | 569.317 | 26.109 | Auto MS/MS | 568.3095 |

**Compound Chromatograms**

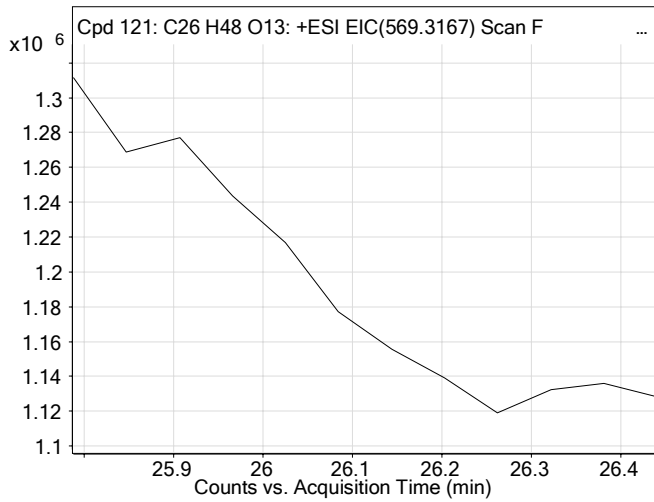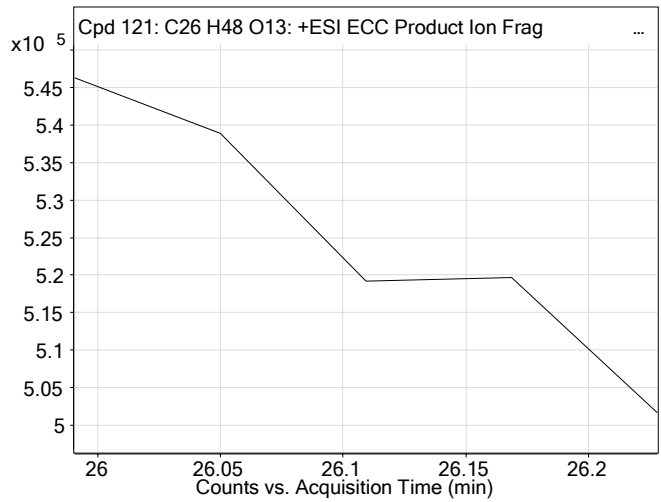

MS Spectrum

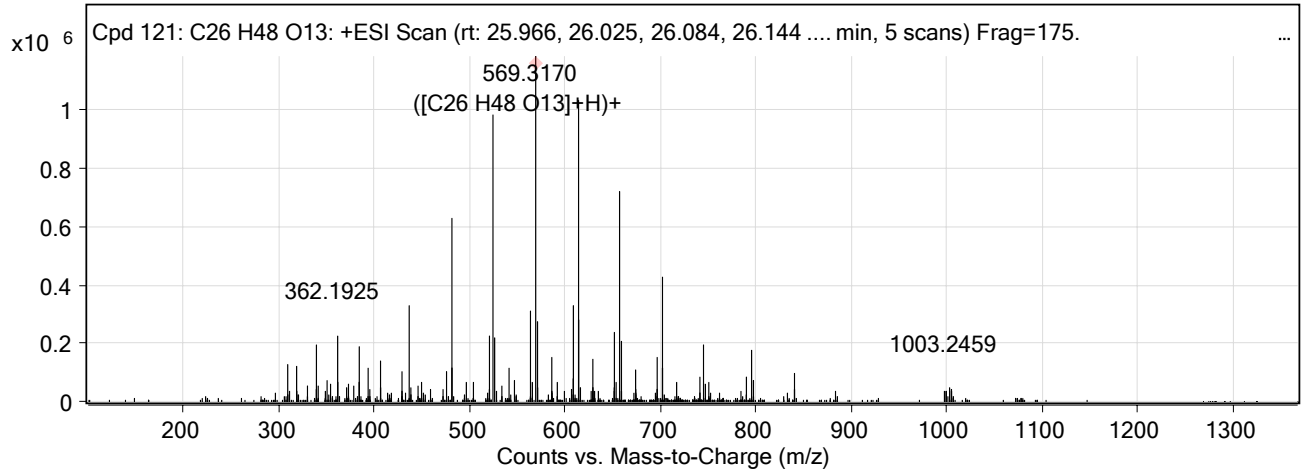

MS Zoomed Spectrum

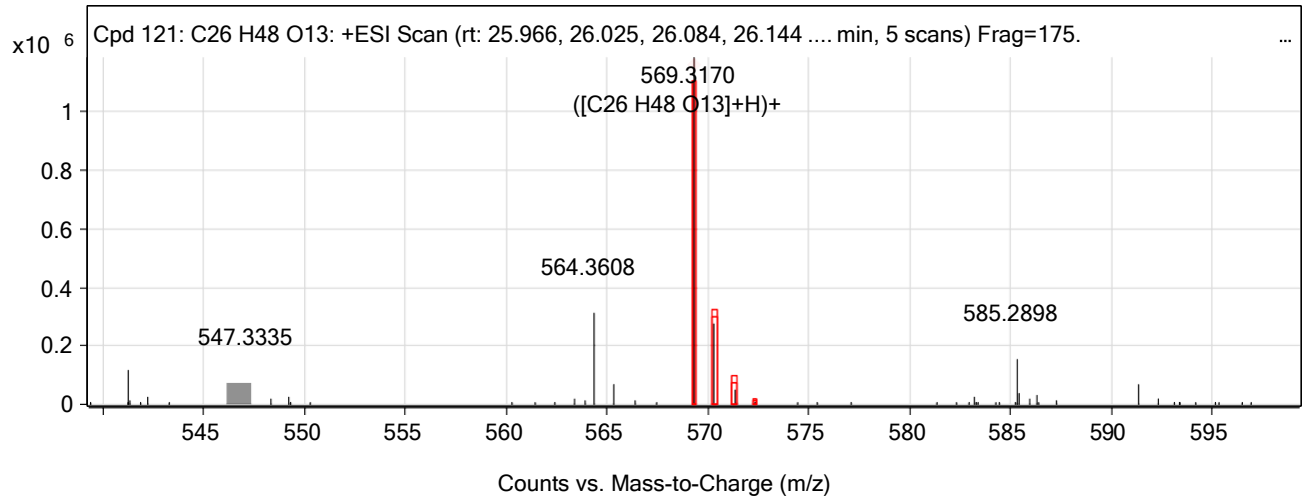

**MS Spectrum Peak List**

| m/z      | Calc m/z | Diff(ppm) | z | Abund     | Formula                                         | Ion                |
|----------|----------|-----------|---|-----------|-------------------------------------------------|--------------------|
| 481.2637 |          |           | 1 | 633336.31 |                                                 |                    |
| 525.2906 |          |           | 1 | 983876.88 |                                                 |                    |
| 569.317  | 569.3168 | -0.4      | 1 | 1186524.5 | C <sub>26</sub> H <sub>48</sub> O <sub>13</sub> | (M+H) <sup>+</sup> |
| 570.3195 | 570.3202 | 1.13      | 1 | 278502.31 | C <sub>26</sub> H <sub>48</sub> O <sub>13</sub> | (M+H) <sup>+</sup> |
| 571.3215 | 571.3226 | 1.83      | 1 | 48579.35  | C <sub>26</sub> H <sub>48</sub> O <sub>13</sub> | (M+H) <sup>+</sup> |
| 572.3243 | 572.3253 | 1.8       | 1 | 6730.81   | C <sub>26</sub> H <sub>48</sub> O <sub>13</sub> | (M+H) <sup>+</sup> |
| 608.3873 |          |           | 1 | 331857.44 |                                                 |                    |
| 613.3433 |          |           | 1 | 1031696.5 |                                                 |                    |
| 657.3695 |          |           | 1 | 719597.56 |                                                 |                    |
| 701.3954 |          |           | 1 | 430183.59 |                                                 |                    |

MSMS Spectrum

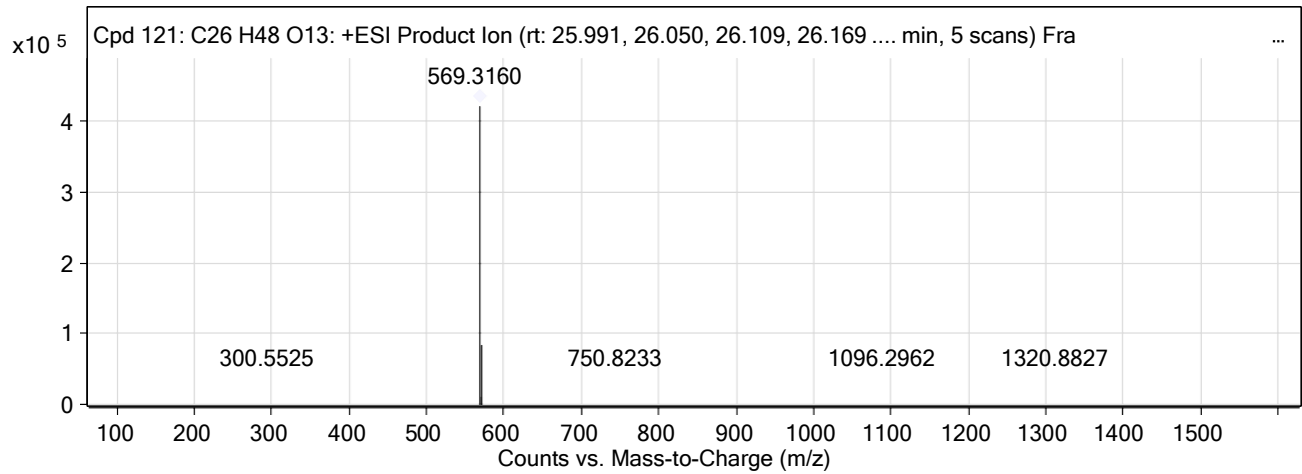

**MS/MS Spectrum PeakList**

| m/z      | Calc m/z | Diff(ppm) | z | Abund     |
|----------|----------|-----------|---|-----------|
| 117.0908 | 117.091  | 1.45      |   | 15.02     |
| 133.085  | 133.0859 | 7.14      |   | 39.47     |
| 265.2491 | 265.2526 | 13.31     |   | 19        |
| 309.2766 | 309.2788 | 7.28      | 1 | 26.5      |
| 438.2743 | 438.2823 | 18.41     |   | 14.51     |
| 566.2885 | 566.2933 | 8.38      |   | 48.8      |
| 569.316  | 569.3168 | 1.34      | 1 | 421506.81 |
| 570.3187 |          |           | 1 | 82221.21  |
| 571.3207 |          |           | 1 | 9931.07   |
| 571.3907 |          |           | 2 | 890.46    |

| Compound Label                                           | m/z      | RT     | Algorithm  | Mass     |
|----------------------------------------------------------|----------|--------|------------|----------|
| Cpd 122: C <sub>28</sub> H <sub>52</sub> O <sub>14</sub> | 613.3437 | 26.215 | Auto MS/MS | 612.3362 |

**Compound Chromatograms**

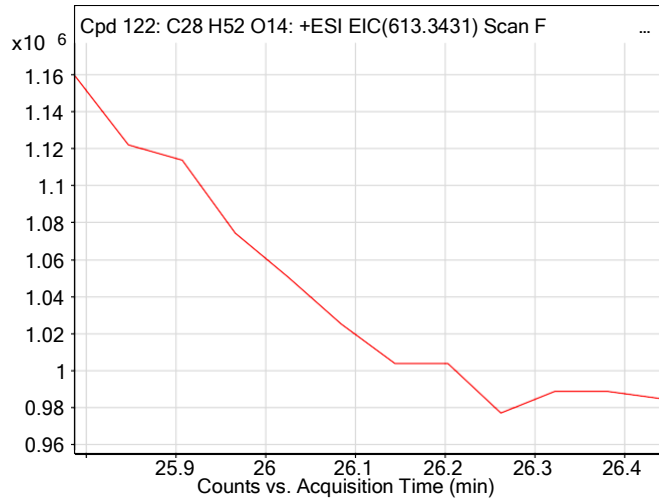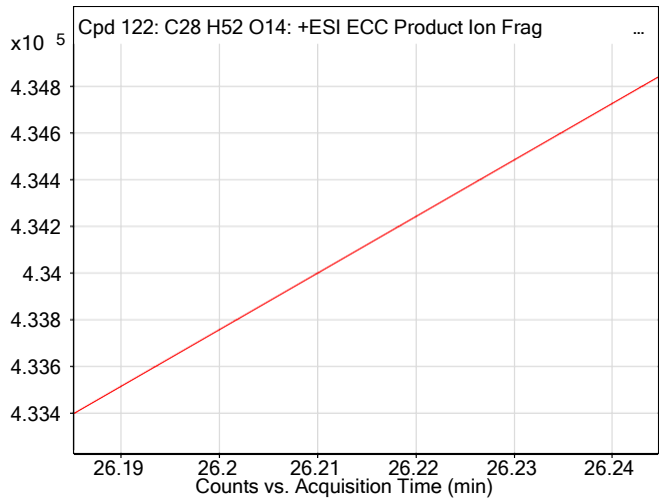

MS Spectrum

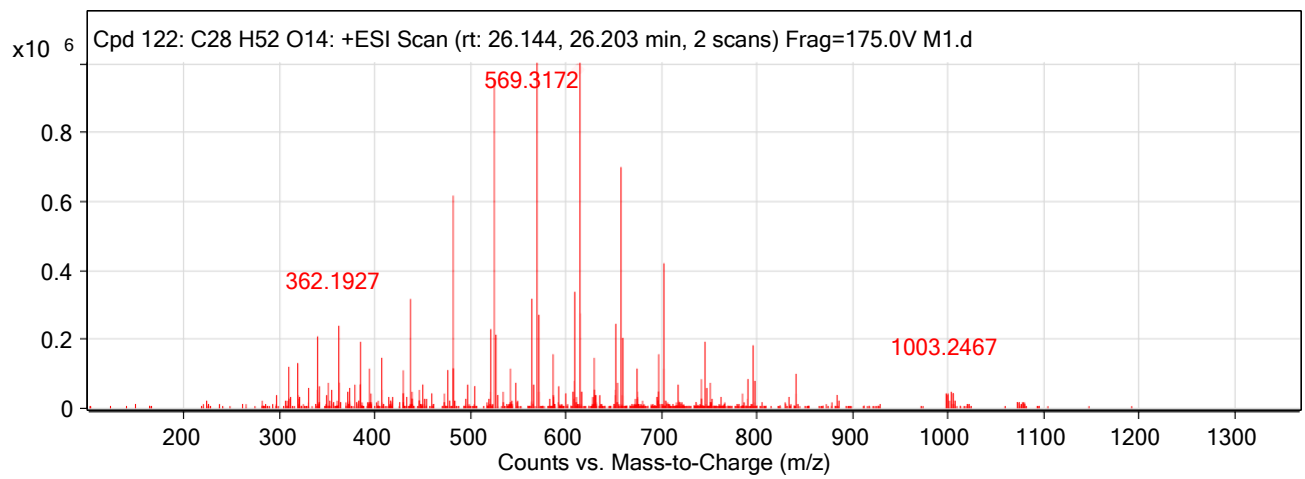

MS Zoomed Spectrum

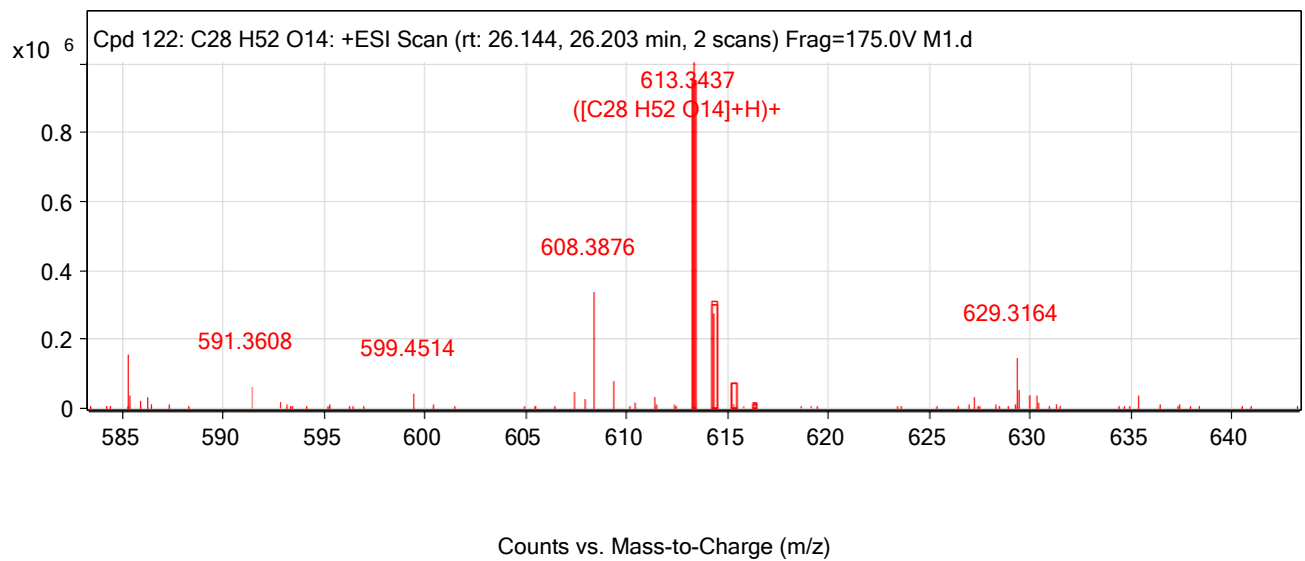

MS Spectrum Peak List

| <i>m/z</i> | Calc <i>m/z</i> | Diff(ppm) | <i>z</i> | Abund      | Formula     | Ion    |
|------------|-----------------|-----------|----------|------------|-------------|--------|
| 481.264    |                 |           | 1        | 613487.44  |             |        |
| 525.2909   |                 |           | 1        | 950788.25  |             |        |
| 569.3172   |                 |           | 1        | 1147327.25 |             |        |
| 608.3876   |                 |           | 1        | 336996.56  |             |        |
| 613.3437   | 613.343         | -1.24     | 1        | 1003813.13 | C28 H52 O14 | (M+H)+ |
| 614.3463   | 614.3464        | 0.15      | 1        | 275381.16  | C28 H52 O14 | (M+H)+ |
| 615.3482   | 615.3489        | 1.06      | 1        | 48801.38   | C28 H52 O14 | (M+H)+ |
| 616.3531   | 616.3515        | -2.57     | 1        | 7017.49    | C28 H52 O14 | (M+H)+ |
| 657.3699   |                 |           | 1        | 699093     |             |        |

MSMS Spectrum

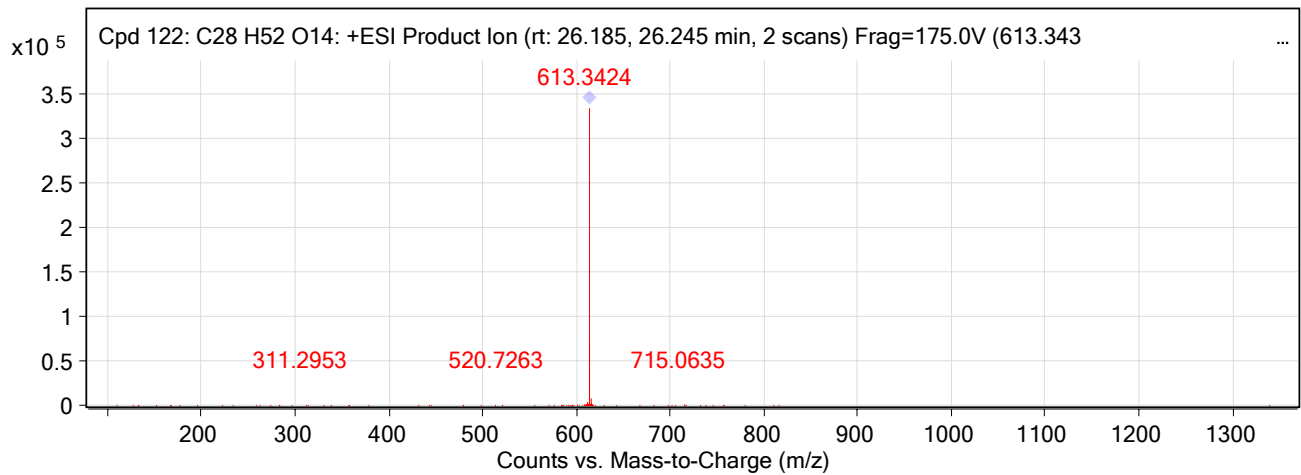

MS/MS Spectrum PeakList

| m/z      | Calc m/z | Diff(ppm) | z | Abund     |
|----------|----------|-----------|---|-----------|
| 133.0867 | 133.0859 | -5.79     |   | 125.26    |
| 177.1137 | 177.1121 | -9.01     |   | 24.09     |
| 283.2634 | 283.2632 | -0.7      |   | 47.26     |
| 296.1509 | 296.1466 | -14.57    |   | 30.75     |
| 311.2953 | 311.2945 | -2.59     |   | 59.58     |
| 312.2993 | 312.3023 | 9.67      |   | 44.84     |
| 357.0705 | 357.0664 | -11.49    |   | 32.03     |
| 576.3396 | 576.3352 | -7.7      |   | 27.13     |
| 585.3526 | 585.3481 | -7.73     |   | 34.3      |
| 613.3424 | 613.343  | 1.03      | 1 | 334551.34 |

| Compound Label       | m/z      | RT     | Algorithm  | Mass     |
|----------------------|----------|--------|------------|----------|
| Cpd 123: C26 H48 O13 | 569.3169 | 26.406 | Auto MS/MS | 568.3095 |

Compound Chromatograms

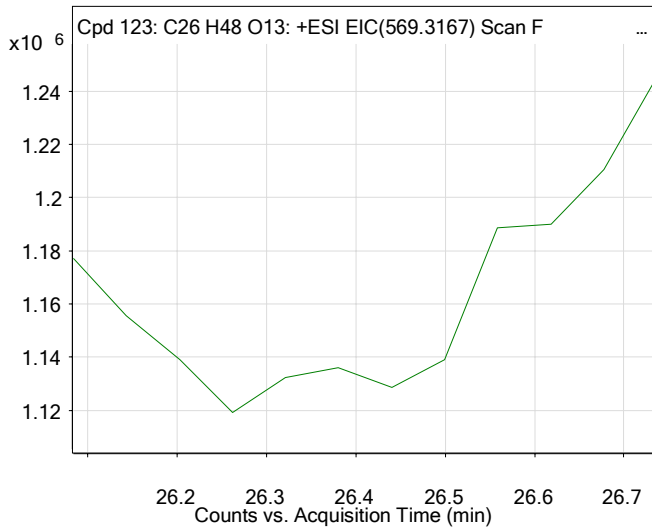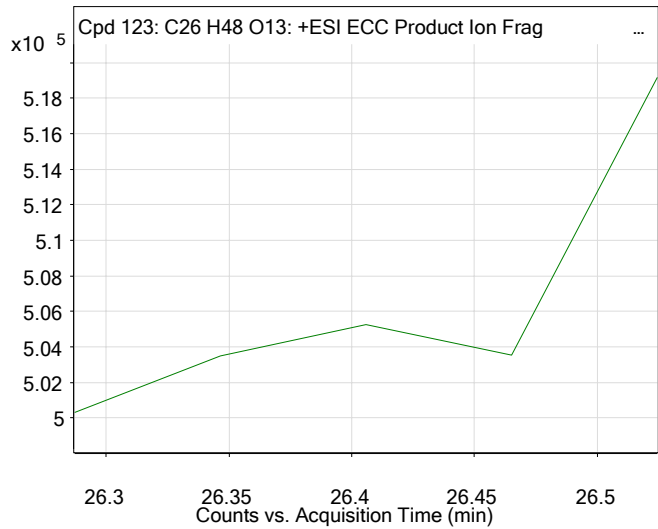

MS Spectrum

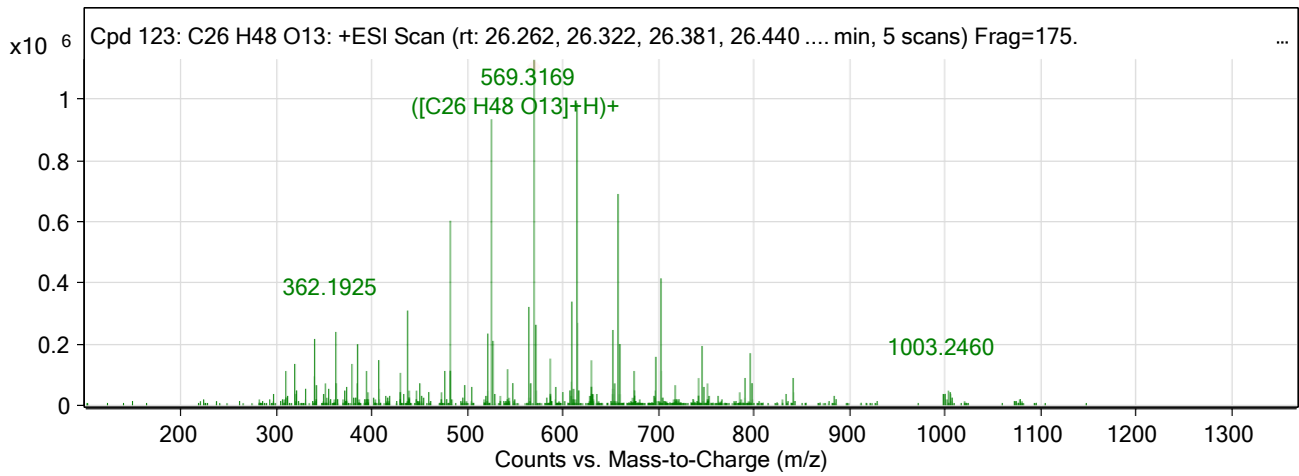

MS Zoomed Spectrum

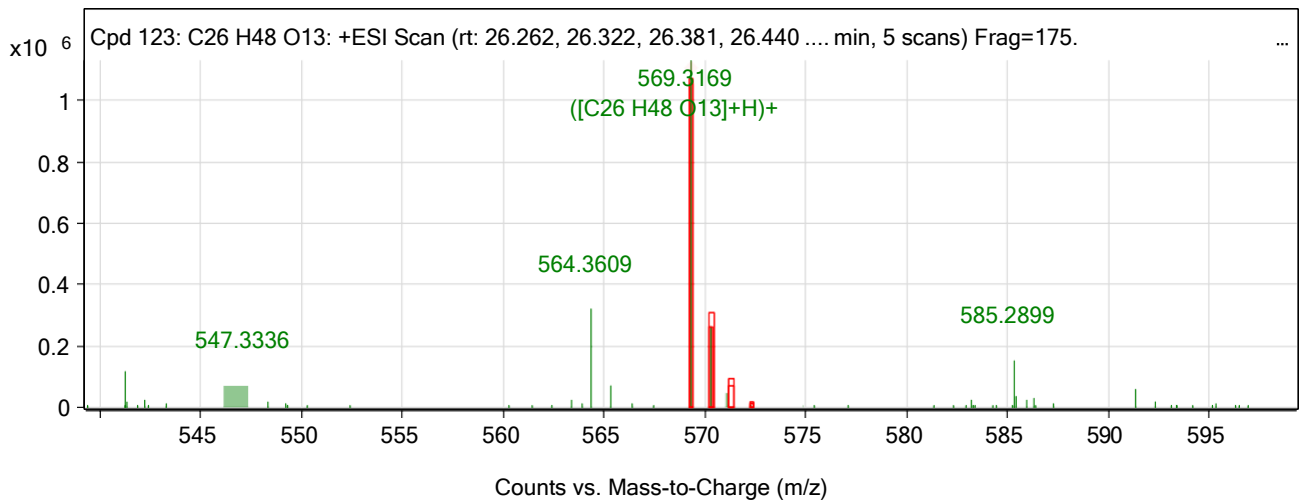

MS Spectrum Peak List

| m/z      | Calc m/z | Diff(ppm) | z | Abund      | Formula                                         | Ion                |
|----------|----------|-----------|---|------------|-------------------------------------------------|--------------------|
| 481.2637 |          |           | 1 | 597981.31  |                                                 |                    |
| 525.2906 |          |           | 1 | 934187.5   |                                                 |                    |
| 569.3169 | 569.3168 | -0.26     | 1 | 1131102.75 | C <sub>26</sub> H <sub>48</sub> O <sub>13</sub> | (M+H) <sup>+</sup> |
| 570.3196 | 570.3202 | 1.03      | 1 | 265065.81  | C <sub>26</sub> H <sub>48</sub> O <sub>13</sub> | (M+H) <sup>+</sup> |
| 571.3216 | 571.3226 | 1.7       | 1 | 45618.41   | C <sub>26</sub> H <sub>48</sub> O <sub>13</sub> | (M+H) <sup>+</sup> |
| 572.3243 | 572.3253 | 1.65      | 1 | 5939.04    | C <sub>26</sub> H <sub>48</sub> O <sub>13</sub> | (M+H) <sup>+</sup> |
| 608.3874 |          |           | 1 | 339823.16  |                                                 |                    |
| 613.3434 |          |           | 1 | 986910.19  |                                                 |                    |
| 657.3696 |          |           | 1 | 686939.19  |                                                 |                    |
| 701.3955 |          |           | 1 | 415200.47  |                                                 |                    |

MSMS Spectrum

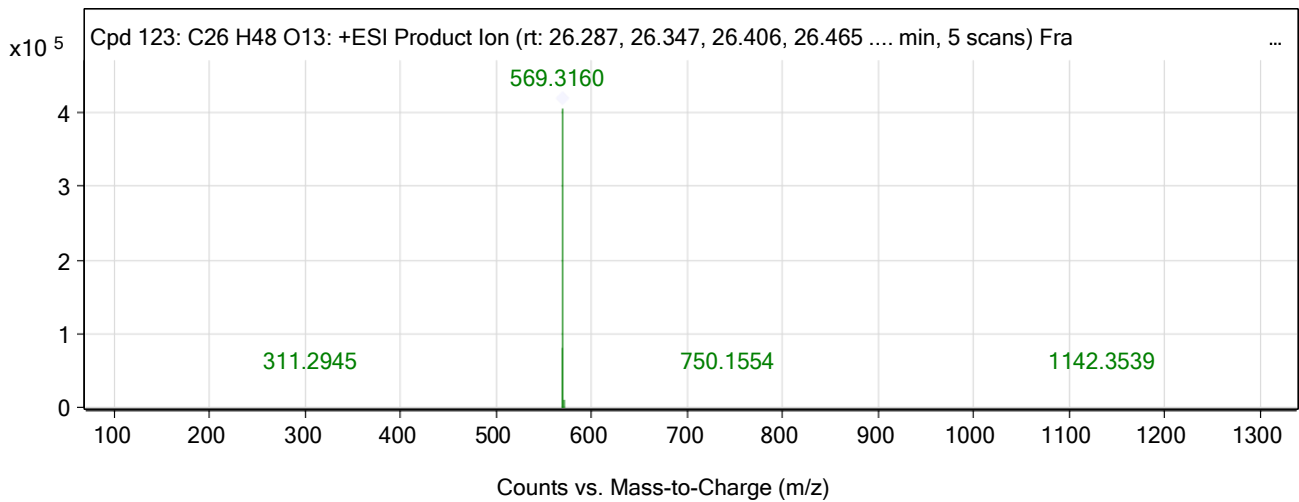

**MS/MS Spectrum Peak List**

| m/z      | Calc m/z | Diff(ppm) | z | Abund     |
|----------|----------|-----------|---|-----------|
| 133.0873 | 133.0859 | -10.25    |   | 32.29     |
| 210.1145 | 210.1098 | -22.2     |   | 26.96     |
| 311.2945 | 311.2945 | -0.11     |   | 58.24     |
| 387.2345 | 387.2377 | 8.33      |   | 15.94     |
| 538.2935 | 538.2984 | 9.03      |   | 17.22     |
| 568.3599 |          |           | 2 | 701.61    |
| 569.316  | 569.3168 | 1.31      | 1 | 405325.31 |
| 570.3186 |          |           | 1 | 79567.23  |
| 571.321  |          |           | 1 | 9623.7    |
| 571.3904 |          |           | 2 | 949.4     |

| Compound Label       | m/z      | RT     | Algorithm  | Mass     |
|----------------------|----------|--------|------------|----------|
| Cpd 124: C24 H44 O12 | 525.2906 | 26.422 | Auto MS/MS | 524.2832 |

**Compound Chromatograms**

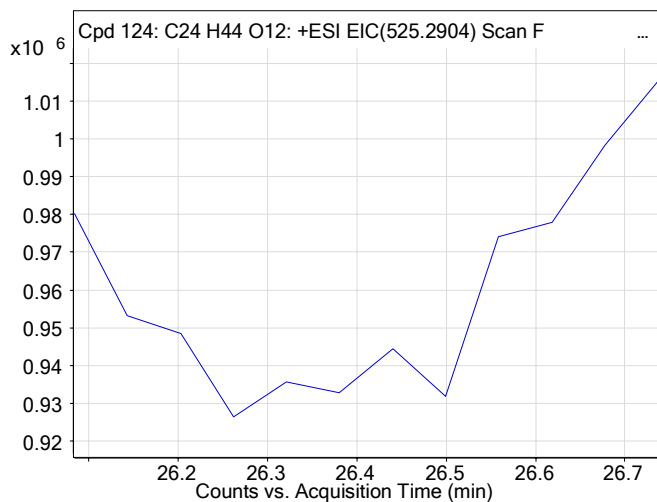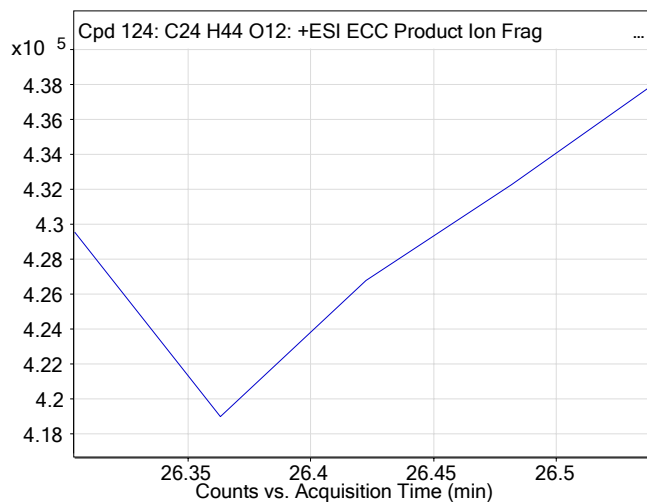

MS Spectrum

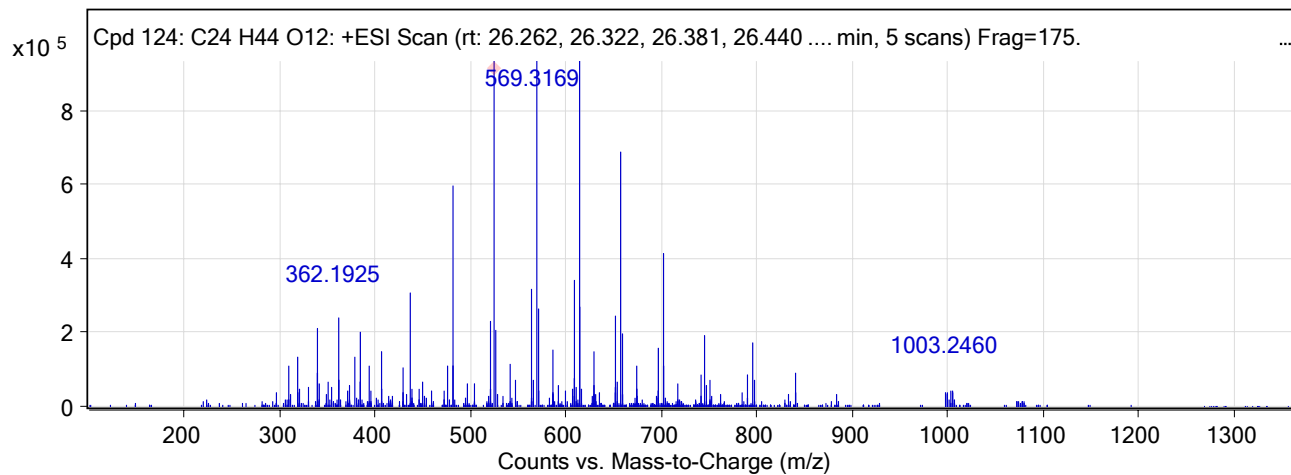

MS Zoomed Spectrum

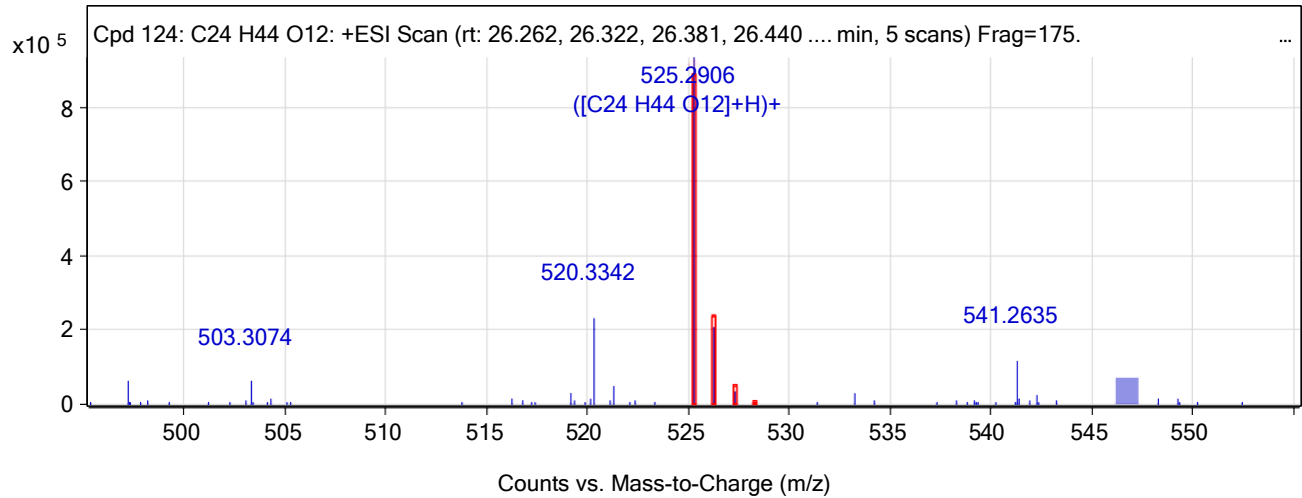

**MS Spectrum Peak List**

| m/z      | Calc m/z | Diff(ppm) | z | Abund      | Formula                                         | Ion    |
|----------|----------|-----------|---|------------|-------------------------------------------------|--------|
| 481.2637 |          |           | 1 | 597981.31  |                                                 |        |
| 525.2906 | 525.2906 | -0.16     | 1 | 934187.5   | C <sub>24</sub> H <sub>44</sub> O <sub>12</sub> | (M+H)+ |
| 526.2933 | 526.294  | 1.35      | 1 | 209124.75  | C <sub>24</sub> H <sub>44</sub> O <sub>12</sub> | (M+H)+ |
| 527.2957 | 527.2963 | 1.2       | 1 | 34684      | C <sub>24</sub> H <sub>44</sub> O <sub>12</sub> | (M+H)+ |
| 528.2985 | 528.299  | 0.9       | 1 | 4650.25    | C <sub>24</sub> H <sub>44</sub> O <sub>12</sub> | (M+H)+ |
| 569.3169 |          |           | 1 | 1131102.75 |                                                 |        |
| 608.3874 |          |           | 1 | 339823.16  |                                                 |        |
| 613.3434 |          |           | 1 | 986910.19  |                                                 |        |
| 657.3696 |          |           | 1 | 686939.19  |                                                 |        |
| 701.3955 |          |           | 1 | 415200.47  |                                                 |        |

MSMS Spectrum

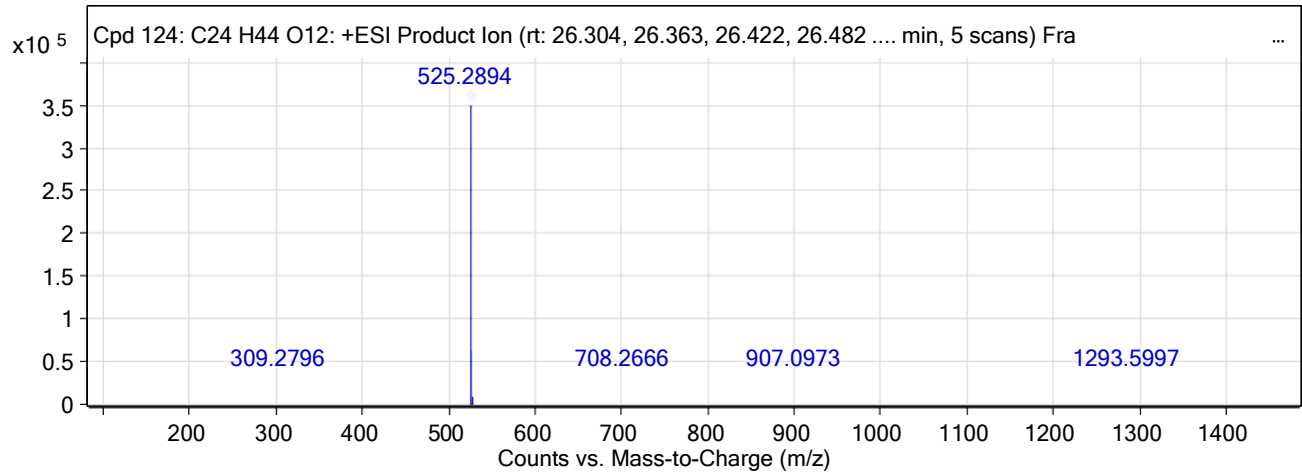

**MS/MS Spectrum PeakList**

| m/z      | Calc m/z | Diff(ppm) | z | Abund     |
|----------|----------|-----------|---|-----------|
| 117.0909 | 117.091  | 1.25      |   | 11.69     |
| 133.0864 | 133.0859 | -3.84     |   | 36.05     |
| 166.0897 | 166.0836 | -37.02    |   | 22.36     |
| 232.1326 | 232.1305 | -8.84     |   | 10.95     |
| 292.2176 | 292.2244 | 23.46     |   | 8.65      |
| 309.2796 | 309.2788 | -2.71     |   | 42.98     |
| 311.2947 | 311.2945 | -0.89     |   | 8.62      |
| 372.2188 | 372.2143 | -12.17    |   | 10        |
| 494.2736 | 494.2722 | -2.93     |   | 23.87     |
| 525.2894 | 525.2906 | 2.15      | 1 | 349515.31 |

| Compound Label                                           | m/z     | RT     | Algorithm  | Mass     |
|----------------------------------------------------------|---------|--------|------------|----------|
| Cpd 125: C <sub>26</sub> H <sub>48</sub> O <sub>13</sub> | 569.317 | 26.702 | Auto MS/MS | 568.3096 |

Compound Chromatograms



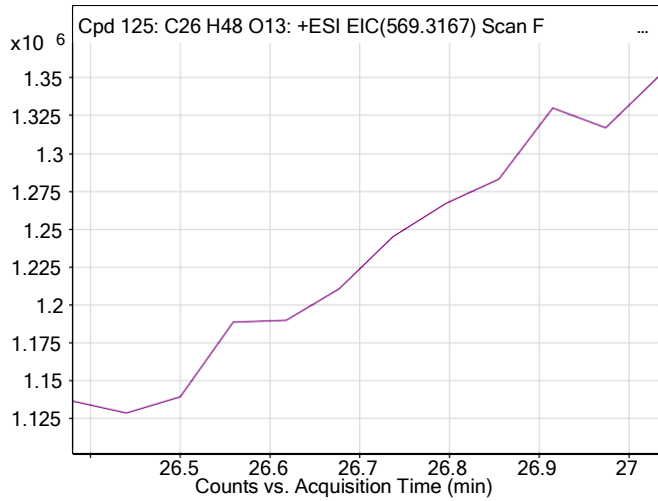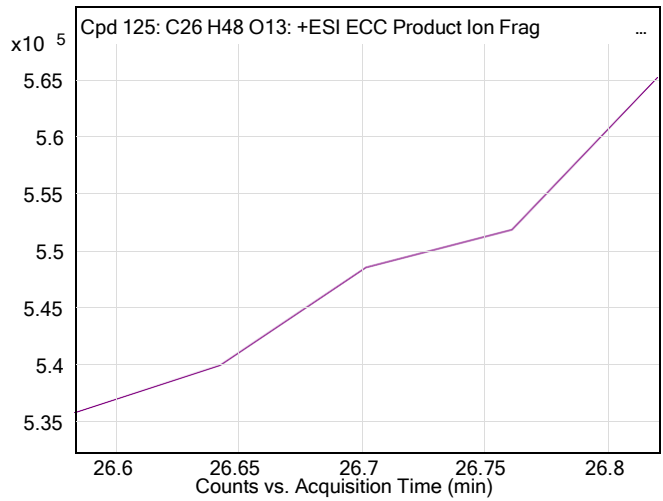

MS Spectrum

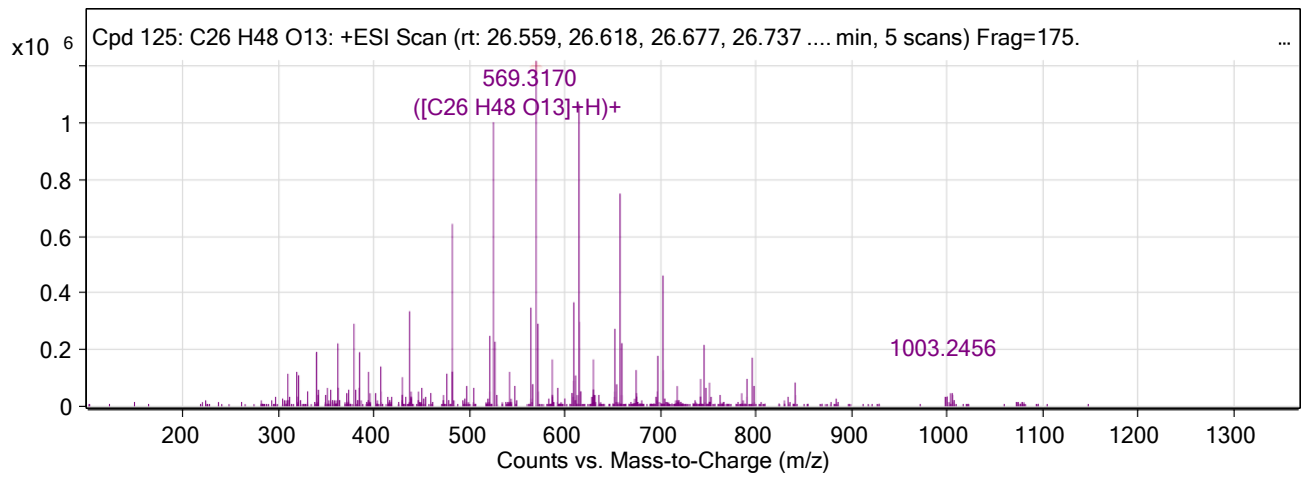

MS Zoomed Spectrum

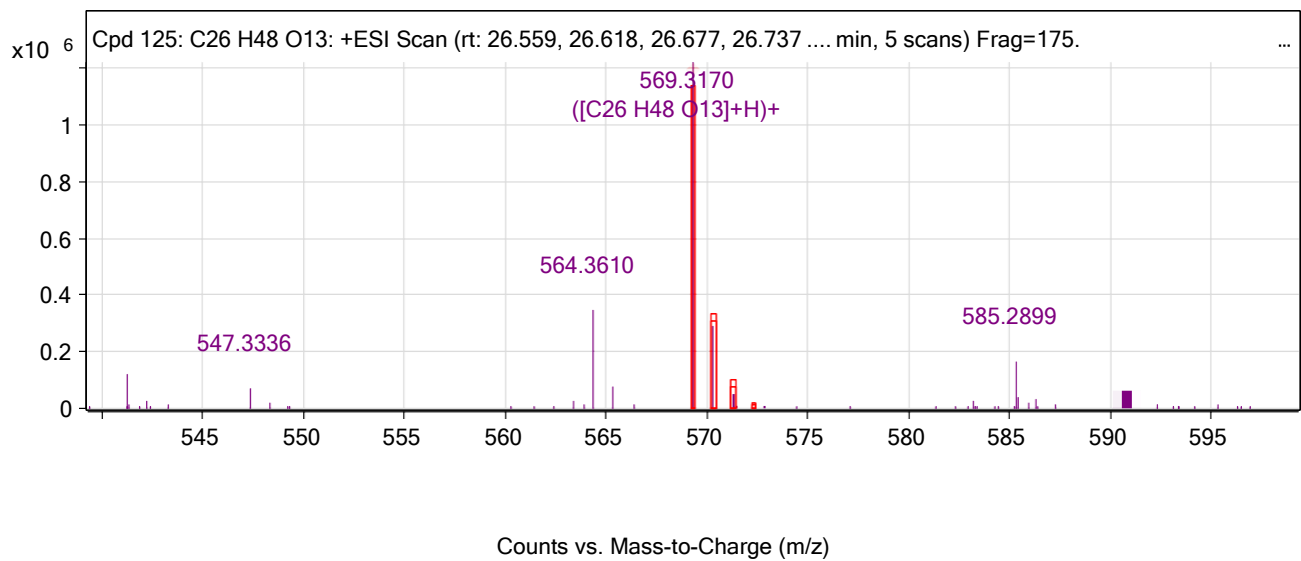

MS Spectrum Peak List

| <i>m/z</i> | Calc <i>m/z</i> | Diff(ppm) | z | Abund      | Formula                                         | Ion                |
|------------|-----------------|-----------|---|------------|-------------------------------------------------|--------------------|
| 481.2637   |                 |           | 1 | 643439.13  |                                                 |                    |
| 525.2906   |                 |           | 1 | 1002167.81 |                                                 |                    |
| 569.317    | 569.3168        | -0.49     | 1 | 1220355.13 | C <sub>26</sub> H <sub>48</sub> O <sub>13</sub> | (M+H) <sup>+</sup> |
| 570.3196   | 570.3202        | 1.02      | 1 | 287053.97  | C <sub>26</sub> H <sub>48</sub> O <sub>13</sub> | (M+H) <sup>+</sup> |
| 571.3216   | 571.3226        | 1.81      | 1 | 49491.14   | C <sub>26</sub> H <sub>48</sub> O <sub>13</sub> | (M+H) <sup>+</sup> |
| 572.3243   | 572.3253        | 1.64      | 1 | 6323.81    | C <sub>26</sub> H <sub>48</sub> O <sub>13</sub> | (M+H) <sup>+</sup> |
| 608.3873   |                 |           | 1 | 367549.75  |                                                 |                    |
| 613.3434   |                 |           | 1 | 1062644.25 |                                                 |                    |
| 657.3695   |                 |           | 1 | 751714.63  |                                                 |                    |

MSMS Spectrum

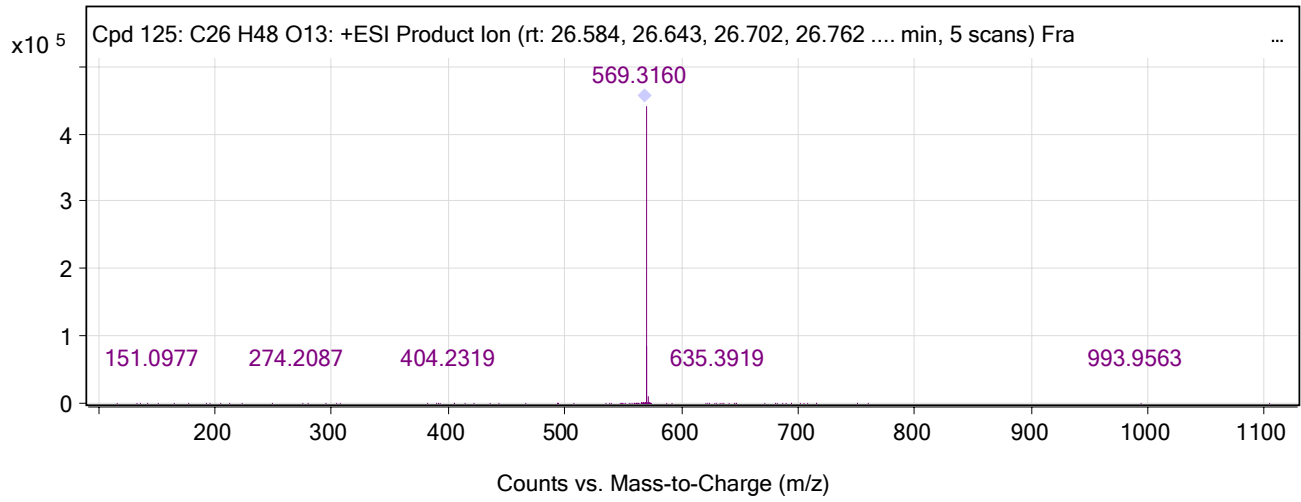

MS/MS Spectrum Peak List

| m/z      | Calc m/z | Diff(ppm)  | z | Abund     |
|----------|----------|------------|---|-----------|
| 133.0873 | 133.0859 | -10.34     |   | 10.8      |
| 136.0925 | 136.0883 | -31.1      |   | 12.56     |
| 165.0929 | 165.091  | -11.25     |   | 14.85     |
| 177.1097 | 177.1121 | 13.76      |   | 12.43     |
| 274.2087 | 274.2139 | 18.93      |   | 15.66     |
| 295.1955 | 295.1904 | -17.41     |   | 10.94     |
| 389.252  | 389.2534 | 3.52       |   | 9.22      |
| 538.3042 | 269.1489 | -500005.89 | 2 | 10.09     |
| 569.316  | 569.3168 | 1.3        | 1 | 441824.41 |
| 570.3187 |          |            | 1 | 85973.86  |

| Compound Label       | m/z      | RT     | Algorithm  | Mass     |
|----------------------|----------|--------|------------|----------|
| Cpd 126: C24 H44 O12 | 525.2906 | 26.719 | Auto MS/MS | 524.2832 |

Compound Chromatograms

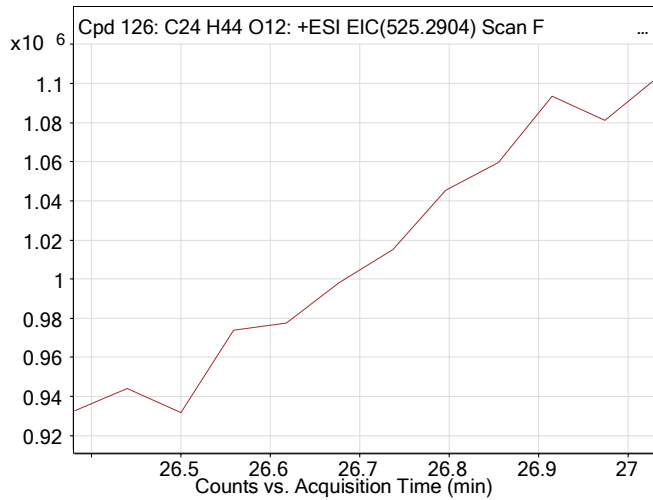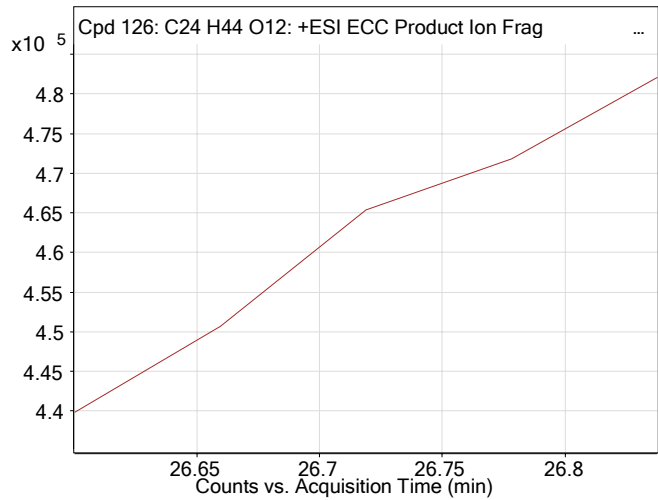

MS Spectrum

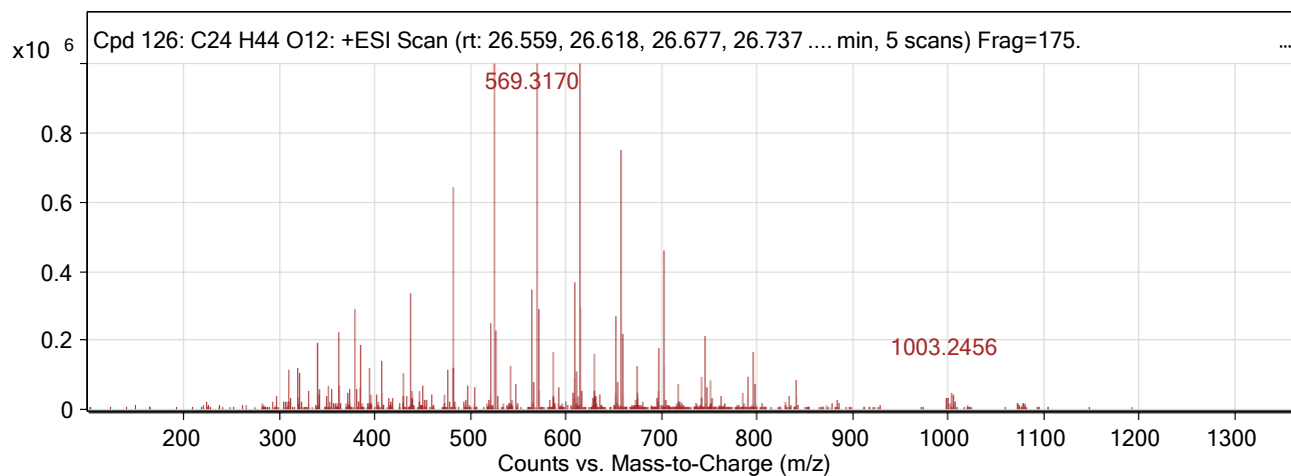

MS Zoomed Spectrum

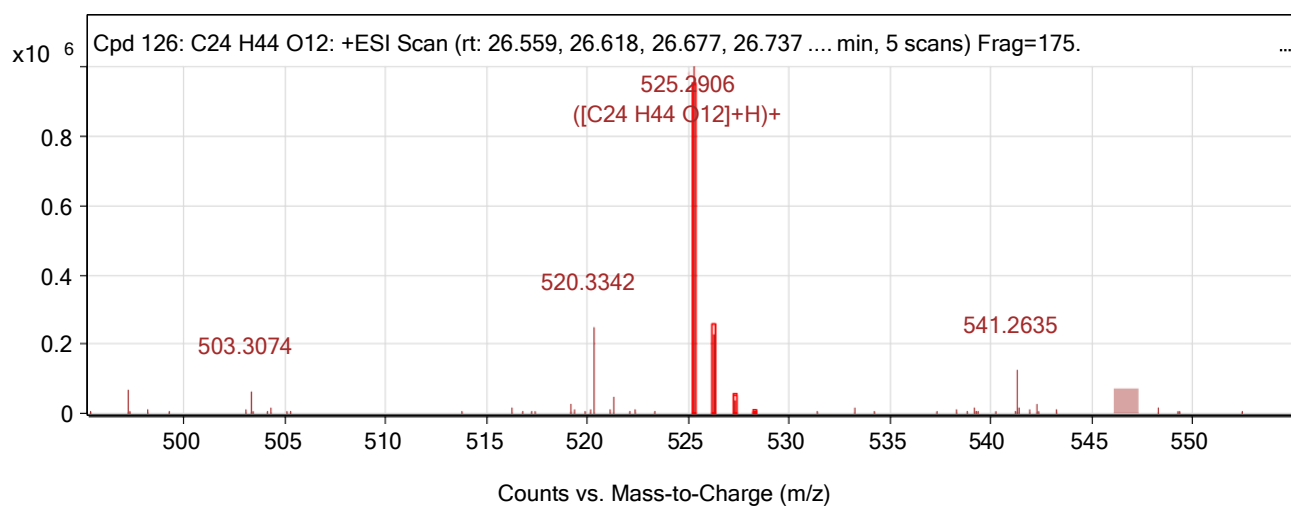

MS Spectrum Peak List

| m/z      | Calc m/z | Diff(ppm) | z | Abund      | Formula                                         | Ion                |
|----------|----------|-----------|---|------------|-------------------------------------------------|--------------------|
| 481.2637 |          |           | 1 | 643439.13  |                                                 |                    |
| 525.2906 | 525.2906 | -0.11     | 1 | 1002167.81 | C <sub>24</sub> H <sub>44</sub> O <sub>12</sub> | (M+H) <sup>+</sup> |
| 526.2933 | 526.294  | 1.32      | 1 | 226014.92  | C <sub>24</sub> H <sub>44</sub> O <sub>12</sub> | (M+H) <sup>+</sup> |
| 527.2956 | 527.2963 | 1.45      | 1 | 37874.53   | C <sub>24</sub> H <sub>44</sub> O <sub>12</sub> | (M+H) <sup>+</sup> |
| 528.298  | 528.299  | 1.84      | 1 | 5052.44    | C <sub>24</sub> H <sub>44</sub> O <sub>12</sub> | (M+H) <sup>+</sup> |
| 569.317  |          |           | 1 | 1220355.13 |                                                 |                    |
| 608.3873 |          |           | 1 | 367549.75  |                                                 |                    |
| 613.3434 |          |           | 1 | 1062644.25 |                                                 |                    |
| 657.3695 |          |           | 1 | 751714.63  |                                                 |                    |
| 701.3955 |          |           | 1 | 458282.09  |                                                 |                    |

MSMS Spectrum

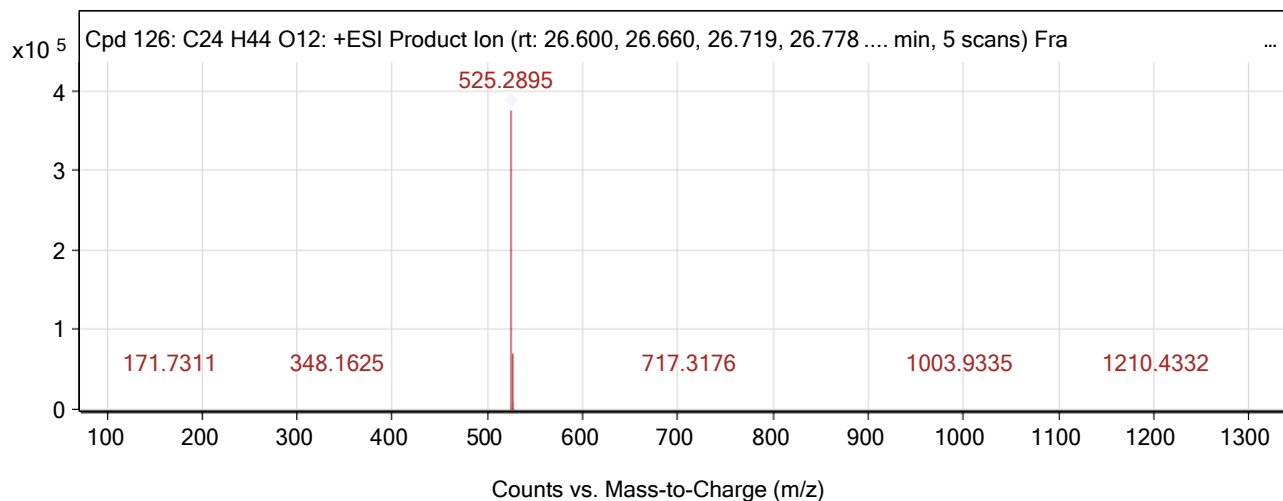

**MS/MS Spectrum Peak List**

| m/z      | Calc m/z | Diff(ppm)  | z | Abund     |
|----------|----------|------------|---|-----------|
| 111.0399 | 111.0441 | 37.38      |   | 10.95     |
| 253.1396 | 253.1434 | 15.29      |   | 13        |
| 263.1946 | 263.2006 | 22.8       |   | 10.27     |
| 277.2486 | 277.2526 | 14.44      |   | 7.93      |
| 296.185  | 296.183  | -6.82      |   | 8.8       |
| 309.2764 | 309.2788 | 7.81       |   | 12.14     |
| 494.2705 | 247.1358 | -499998.84 | 2 | 24.07     |
| 495.2715 |          |            | 2 | 27.03     |
| 522.2675 | 522.2671 | -0.8       | 1 | 60.46     |
| 525.2895 | 525.2906 | 2.06       | 1 | 375469.09 |

| Compound Label          | m/z      | RT     | Algorithm  | Mass     |
|-------------------------|----------|--------|------------|----------|
| Cpd 127: C24 H46 N3 O12 | 569.3166 | 26.999 | Auto MS/MS | 568.3091 |

**Compound Chromatograms**

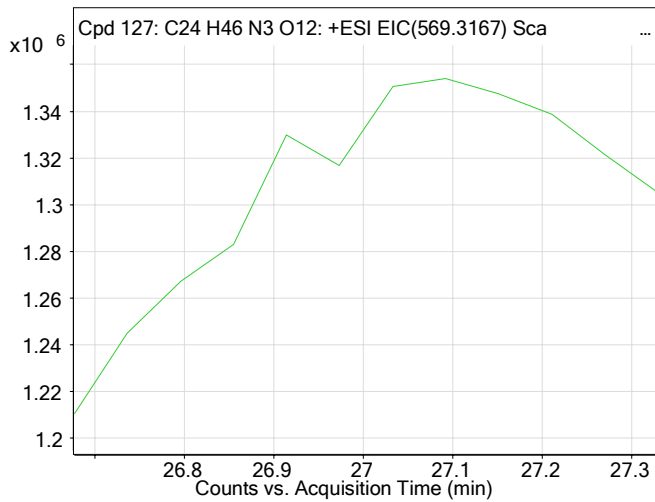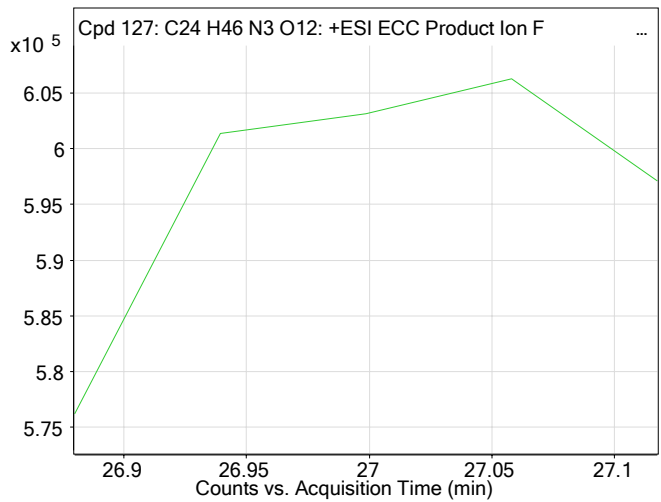

MS Spectrum

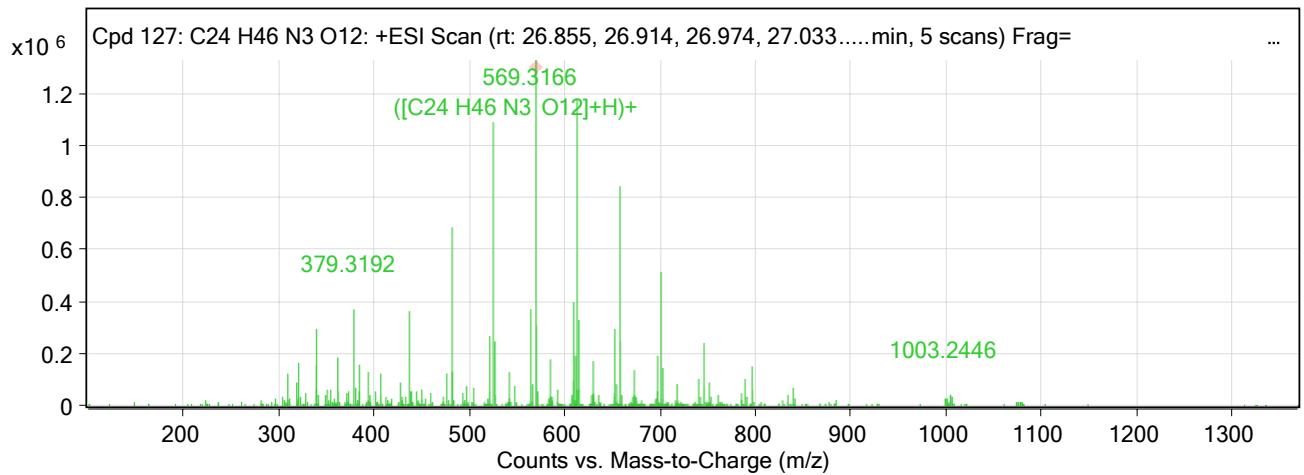

MS Zoomed Spectrum

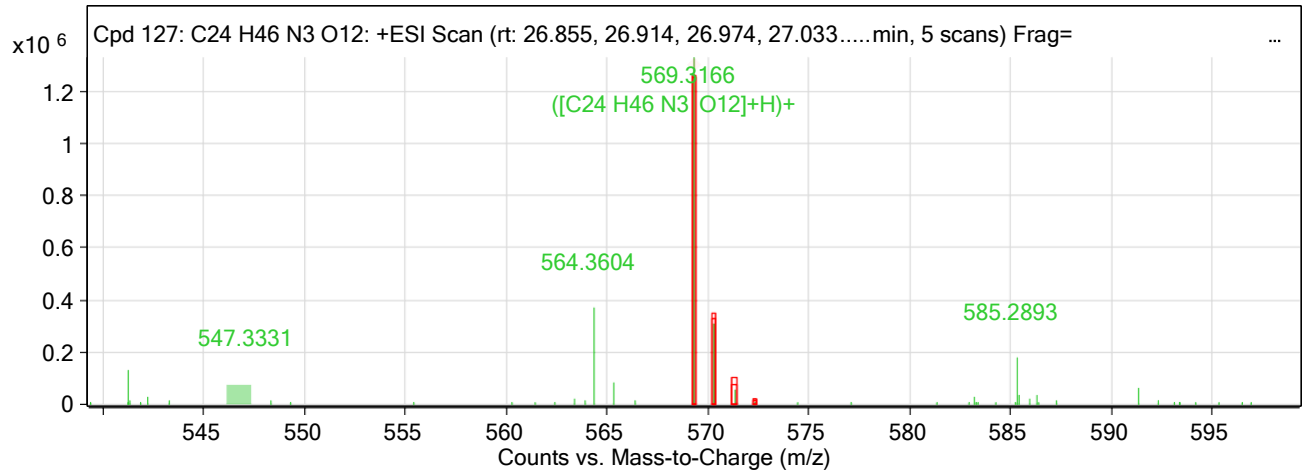

**MS Spectrum Peak List**

| m/z      | Calc m/z | Diff(ppm) | z | Abund      | Formula                                                        | Ion                |
|----------|----------|-----------|---|------------|----------------------------------------------------------------|--------------------|
| 481.2632 |          |           | 1 | 687156.5   |                                                                |                    |
| 525.2901 |          |           | 1 | 1090827.25 |                                                                |                    |
| 569.3166 | 569.3154 | -2.03     | 1 | 1326877.38 | C <sub>24</sub> H <sub>46</sub> N <sub>3</sub> O <sub>12</sub> | (M+H) <sup>+</sup> |
| 570.3191 | 570.3186 | -0.89     | 1 | 310344.09  | C <sub>24</sub> H <sub>46</sub> N <sub>3</sub> O <sub>12</sub> | (M+H) <sup>+</sup> |
| 571.3211 | 571.3209 | -0.19     | 1 | 54245.86   | C <sub>24</sub> H <sub>46</sub> N <sub>3</sub> O <sub>12</sub> | (M+H) <sup>+</sup> |
| 572.3237 | 572.3235 | -0.31     | 1 | 7299.28    | C <sub>24</sub> H <sub>46</sub> N <sub>3</sub> O <sub>12</sub> | (M+H) <sup>+</sup> |
| 608.3868 |          |           | 1 | 400318.59  |                                                                |                    |
| 613.3428 |          |           | 1 | 1176897.13 |                                                                |                    |
| 657.3689 |          |           | 1 | 839534     |                                                                |                    |
| 701.3948 |          |           | 1 | 514791     |                                                                |                    |

MSMS Spectrum

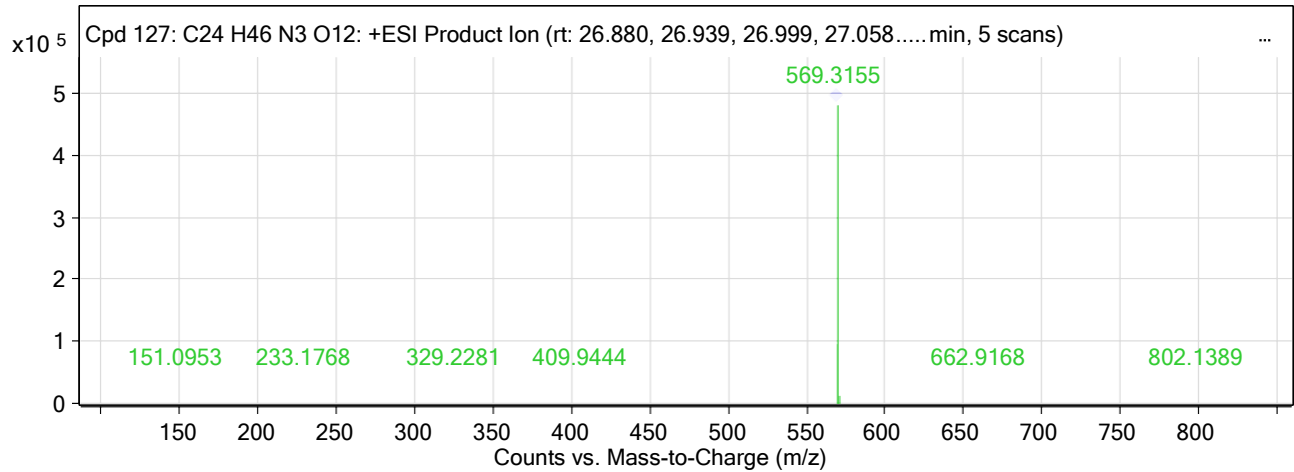

**MS/MS Spectrum PeakList**

| m/z      | Calc m/z | Diff(ppm) | z | Abund     |
|----------|----------|-----------|---|-----------|
| 133.0871 | 133.0859 | -8.84     |   | 29.85     |
| 144.0756 | 144.0768 | 8.15      |   | 13.56     |
| 151.0953 | 151.0951 | -0.84     |   | 46.77     |
| 195.1218 | 195.1214 | -2.47     |   | 14.55     |
| 233.1768 | 233.1774 | 2.46      |   | 15.2      |
| 265.1635 | 265.1632 | -1.13     |   | 10.64     |
| 309.277  | 309.2775 | 1.35      |   | 10.95     |
| 329.2281 | 329.2309 | 8.49      |   | 13.2      |
| 466.2988 | 466.3011 | 4.75      |   | 10.73     |
| 569.3155 | 569.3154 | -0.13     | 1 | 480446.06 |

| Compound Label                                                          | m/z      | RT     | Algorithm  | Mass     |
|-------------------------------------------------------------------------|----------|--------|------------|----------|
| Cpd 128: C <sub>22</sub> H <sub>42</sub> N <sub>3</sub> O <sub>11</sub> | 525.2901 | 27.015 | Auto MS/MS | 524.2827 |

Compound Chromatograms

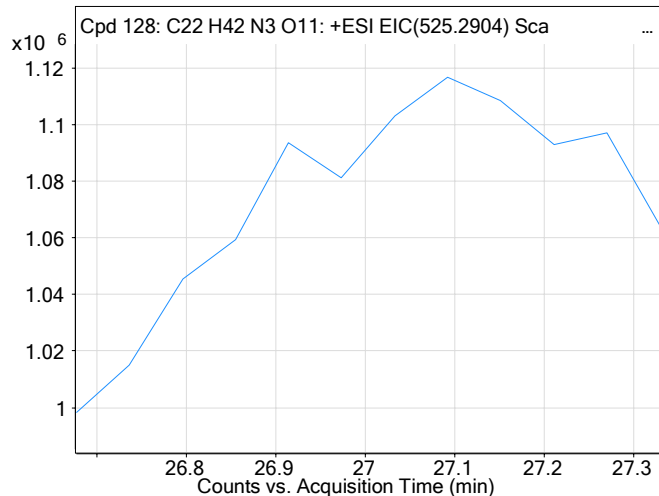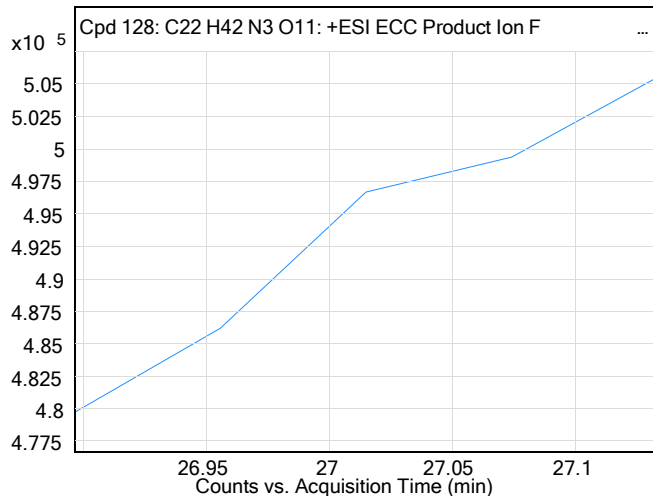

MS Spectrum

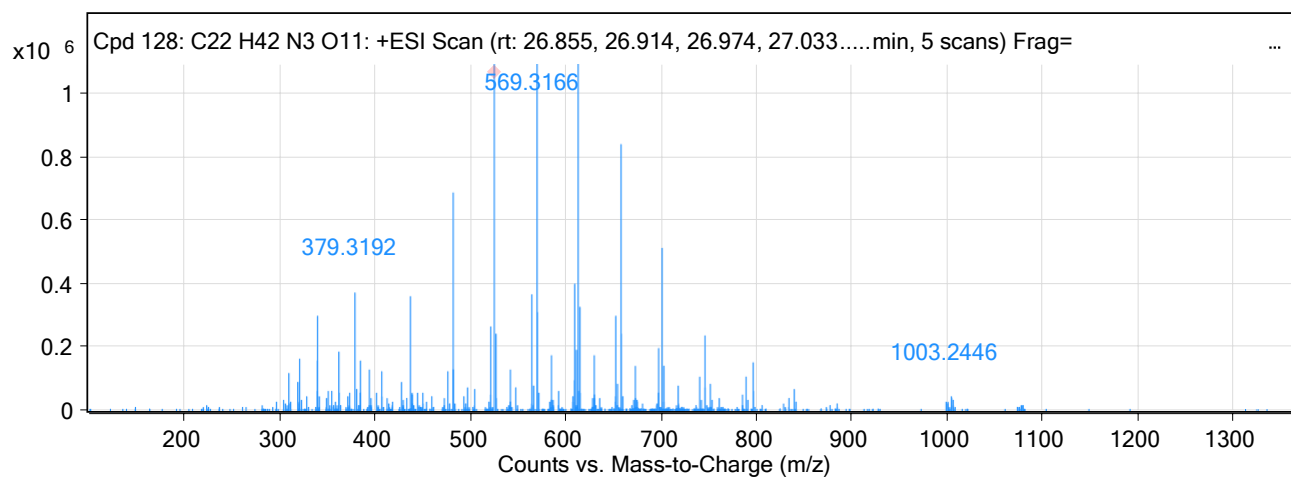

MS Zoomed Spectrum

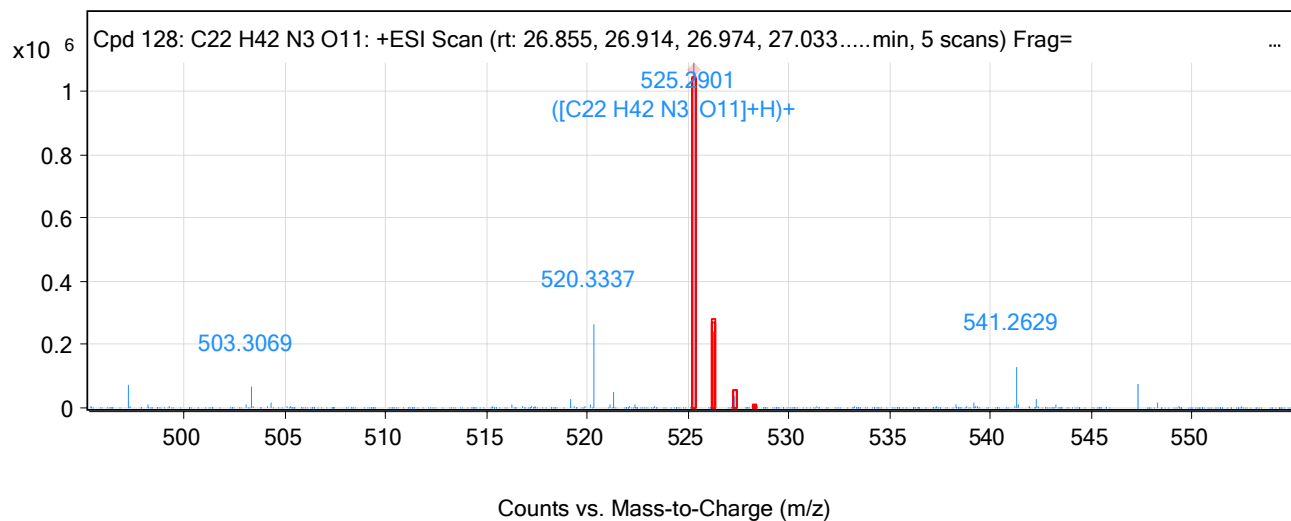

Counts vs. Mass-to-Charge (m/z)

MS Spectrum Peak List

| <i>m/z</i> | Calc <i>m/z</i> | Diff(ppm) | z | Abund      | Formula        | Ion    |
|------------|-----------------|-----------|---|------------|----------------|--------|
| 481.2632   |                 |           | 1 | 687156.5   |                |        |
| 525.2901   | 525.2892        | -1.68     | 1 | 1090827.25 | C22 H42 N3 O11 | (M+H)+ |
| 526.2928   | 526.2924        | -0.8      | 1 | 244549.83  | C22 H42 N3 O11 | (M+H)+ |
| 527.2951   | 527.2947        | -0.76     | 1 | 40639.93   | C22 H42 N3 O11 | (M+H)+ |
| 528.2978   | 528.2972        | -1.04     | 1 | 5166.33    | C22 H42 N3 O11 | (M+H)+ |
| 569.3166   |                 |           | 1 | 1326877.38 |                |        |
| 608.3868   |                 |           | 1 | 400318.59  |                |        |
| 613.3428   |                 |           | 1 | 1176897.13 |                |        |
| 657.3689   |                 |           | 1 | 839534     |                |        |



MSMS Spectrum

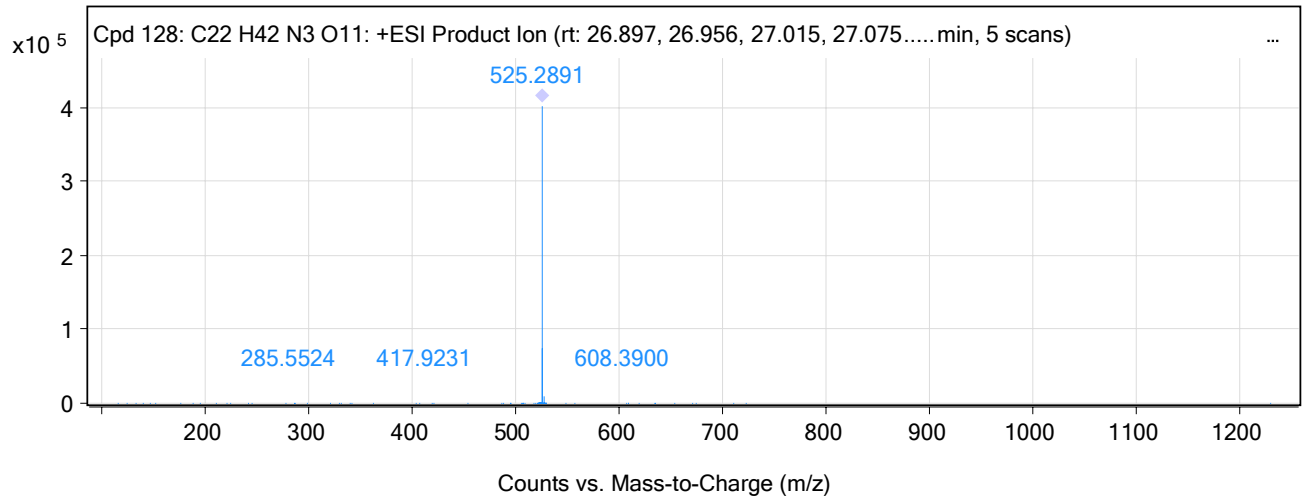

MS/MS Spectrum PeakList

| m/z      | Calc m/z | Diff(ppm) | z | Abund     |
|----------|----------|-----------|---|-----------|
| 124.0805 | 124.0757 | -38.94    |   | 16.69     |
| 151.0973 | 151.0992 | 12.04     |   | 15.28     |
| 188.1035 | 188.103  | -2.9      |   | 13.51     |
| 210.115  | 210.1125 | -11.93    |   | 12.18     |
| 221.1368 | 221.137  | 0.87      |   | 10.74     |
| 285.2069 | 285.206  | -3.01     |   | 11.87     |
| 328.2341 | 328.2357 | 4.89      |   | 10.49     |
| 453.2563 | 453.2568 | 1.24      |   | 10.08     |
| 494.2684 | 494.2708 | 4.95      | 1 | 26.72     |
| 525.2891 | 525.2892 | 0.31      | 1 | 402156.06 |

| Compound Label       | m/z      | RT     | Algorithm  | Mass     |
|----------------------|----------|--------|------------|----------|
| Cpd 129: C26 H48 O13 | 569.3168 | 27.295 | Auto MS/MS | 568.3093 |

Compound Chromatograms

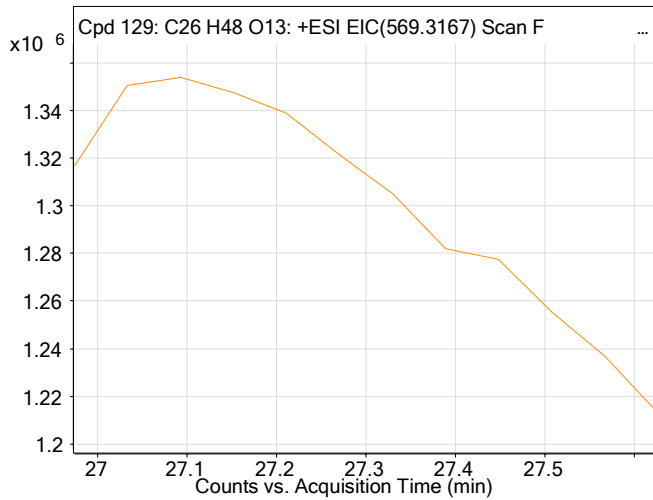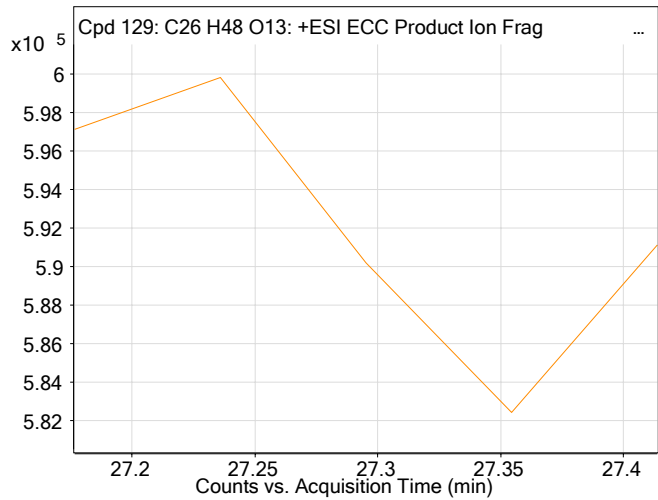

MS Spectrum

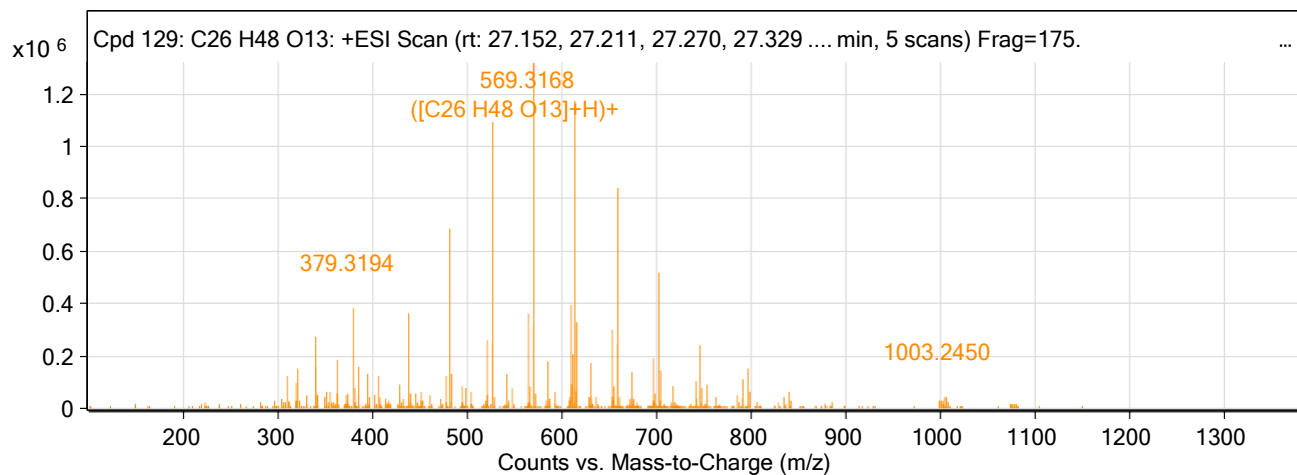

MS Zoomed Spectrum

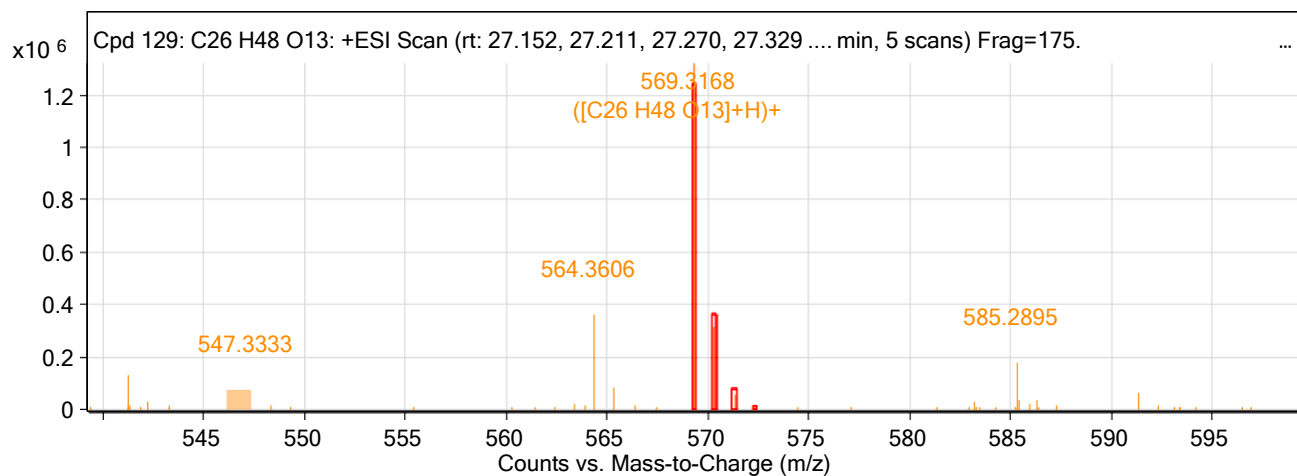

MS Spectrum Peak List

| m/z      | Calc m/z | Diff(ppm) | z | Abund      | Formula                                         | Ion                |
|----------|----------|-----------|---|------------|-------------------------------------------------|--------------------|
| 481.2636 |          |           | 1 | 678218.81  |                                                 |                    |
| 525.2903 |          |           | 1 | 1085649.75 |                                                 |                    |
| 569.3168 | 569.3168 | -0.08     | 1 | 1319097.5  | C <sub>26</sub> H <sub>48</sub> O <sub>13</sub> | (M+H) <sup>+</sup> |
| 570.3193 | 570.3202 | 1.5       | 1 | 313481.5   | C <sub>26</sub> H <sub>48</sub> O <sub>13</sub> | (M+H) <sup>+</sup> |
| 571.3213 | 571.3226 | 2.2       | 1 | 54317.59   | C <sub>26</sub> H <sub>48</sub> O <sub>13</sub> | (M+H) <sup>+</sup> |
| 572.3238 | 572.3253 | 2.64      | 1 | 6884.66    | C <sub>26</sub> H <sub>48</sub> O <sub>13</sub> | (M+H) <sup>+</sup> |
| 608.387  |          |           | 1 | 395547.38  |                                                 |                    |
| 613.3431 |          |           | 1 | 1168113.75 |                                                 |                    |
| 657.3692 |          |           | 1 | 835473.88  |                                                 |                    |
| 701.3951 |          |           | 1 | 515739.19  |                                                 |                    |

MSMS Spectrum

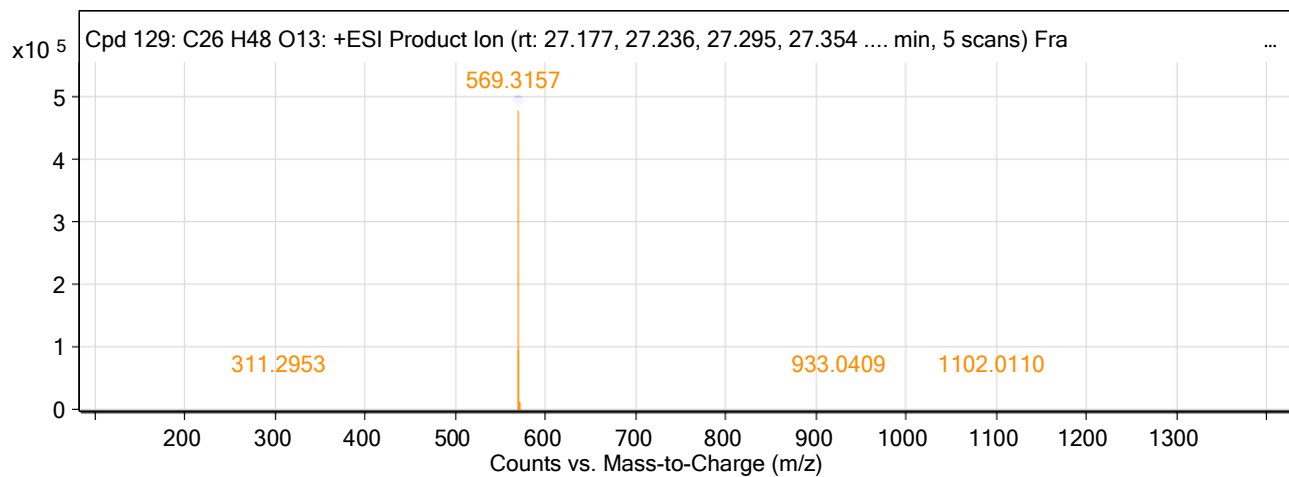

**MS/MS Spectrum Peak List**

| m/z      | Calc m/z | Diff(ppm) | z | Abund     |
|----------|----------|-----------|---|-----------|
| 133.0863 | 133.0859 | -2.47     |   | 61.3      |
| 157.1222 | 157.1223 | 0.57      |   | 10.89     |
| 177.1123 | 177.1121 | -0.69     |   | 11.16     |
| 241.1793 | 241.1798 | 2.25      |   | 14.81     |
| 307.2223 | 307.2268 | 14.65     |   | 11.42     |
| 309.2763 | 309.2788 | 8.24      |   | 18.4      |
| 311.2953 | 311.2945 | -2.68     |   | 46.37     |
| 333.2215 | 333.2272 | 17.13     |   | 14.56     |
| 382.2566 | 382.2561 | -1.34     |   | 14.08     |
| 569.3157 | 569.3168 | 1.83      | 1 | 476343.34 |

| Compound Label          | m/z      | RT     | Algorithm  | Mass     |
|-------------------------|----------|--------|------------|----------|
| Cpd 130: C22 H42 N3 O11 | 525.2903 | 27.312 | Auto MS/MS | 524.2829 |

**Compound Chromatograms**

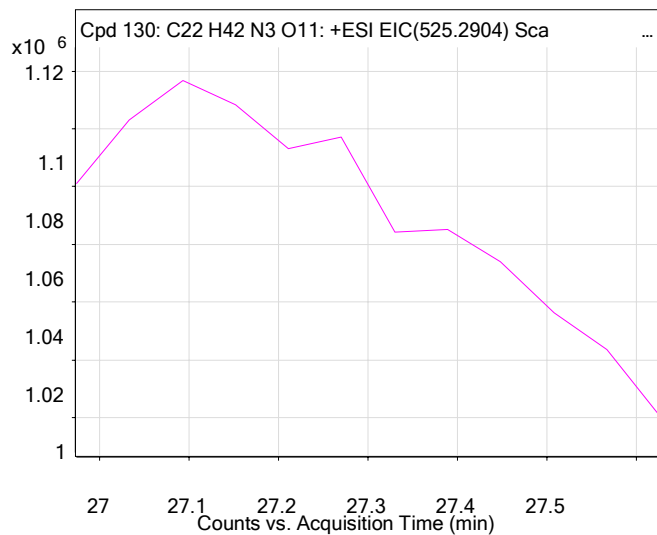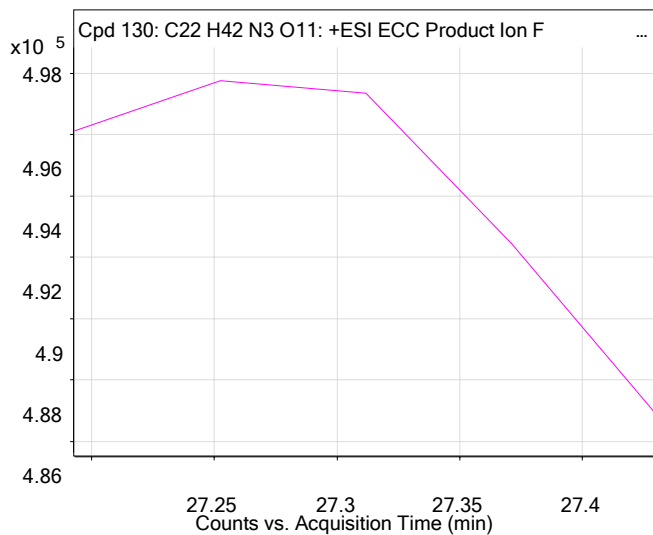

**MS Spectrum**

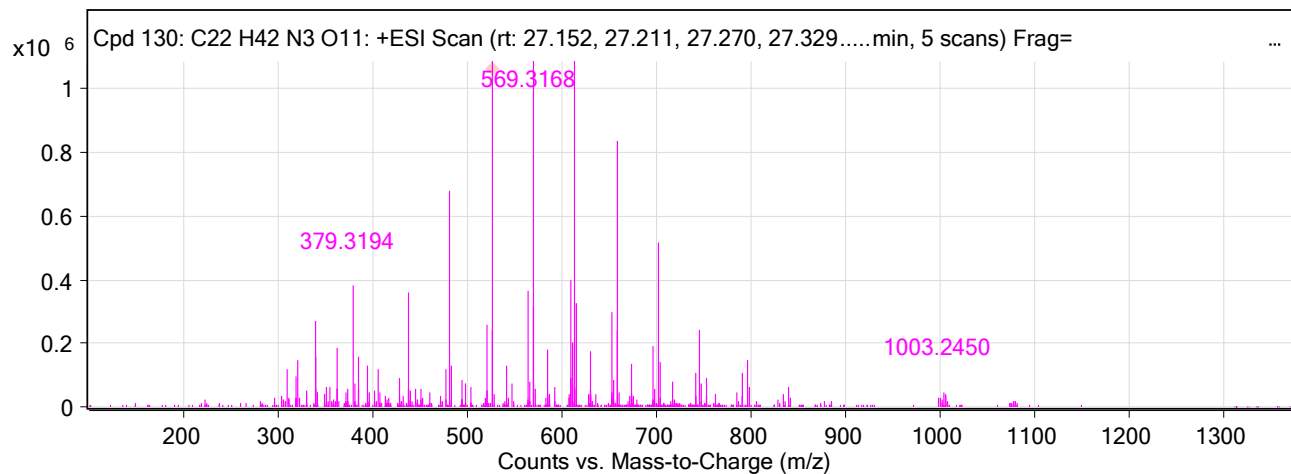

**MS Zoomed Spectrum**

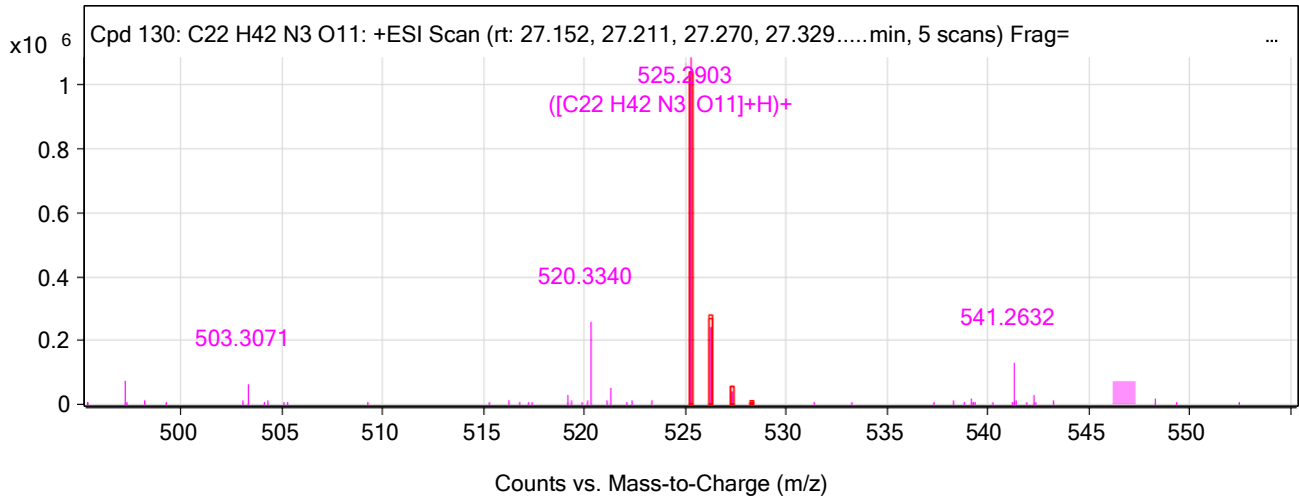

**MS Spectrum Peak List**

| m/z      | Calc m/z | Diff(ppm) | z | Abund      | Formula        | Ion    |
|----------|----------|-----------|---|------------|----------------|--------|
| 481.2636 |          |           | 1 | 678218.81  |                |        |
| 525.2903 | 525.2892 | -2.14     | 1 | 1085649.75 | C22 H42 N3 O11 | (M+H)+ |
| 526.293  | 526.2924 | -1.15     | 1 | 243194.59  | C22 H42 N3 O11 | (M+H)+ |
| 527.2952 | 527.2947 | -0.94     | 1 | 41871.57   | C22 H42 N3 O11 | (M+H)+ |
| 528.298  | 528.2972 | -1.51     | 1 | 5494.75    | C22 H42 N3 O11 | (M+H)+ |
| 569.3168 |          |           | 1 | 1319097.5  |                |        |
| 608.387  |          |           | 1 | 395547.38  |                |        |
| 613.3431 |          |           | 1 | 1168113.75 |                |        |
| 657.3692 |          |           | 1 | 835473.88  |                |        |
| 701.3951 |          |           | 1 | 515739.19  |                |        |

MSMS Spectrum

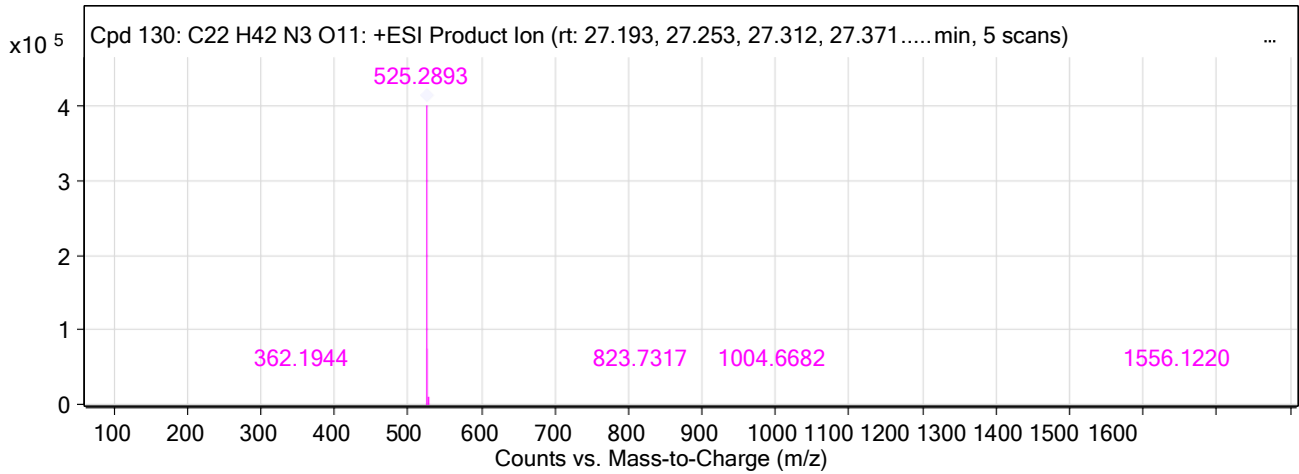

**MS/MS Spectrum Peak List**

| m/z      | Calc m/z | Diff(ppm)  | z | Abund     |
|----------|----------|------------|---|-----------|
| 117.0907 | 117.091  | 2.96       |   | 10.47     |
| 133.0851 | 133.0846 | -4.24      |   | 32.97     |
| 209.0805 | 209.0768 | -17.74     |   | 17.6      |
| 309.2824 | 309.2788 | -11.56     |   | 11.6      |
| 318.2342 | 318.2387 | 14.3       |   | 10.24     |
| 334.245  | 334.2462 | 3.56       |   | 10.86     |
| 362.1944 | 362.1935 | -2.51      |   | 19.26     |
| 478.2779 | 478.2759 | -4.2       |   | 10.03     |
| 494.2742 | 247.1351 | -500003.99 | 2 | 19.47     |
| 525.2893 | 525.2892 | -0.13      | 1 | 400943.59 |

| Compound Label       | m/z      | RT     | Algorithm  | Mass     |
|----------------------|----------|--------|------------|----------|
| Cpd 131: C26 H48 O13 | 569.3168 | 27.592 | Auto MS/MS | 568.3094 |

Compound Chromatograms

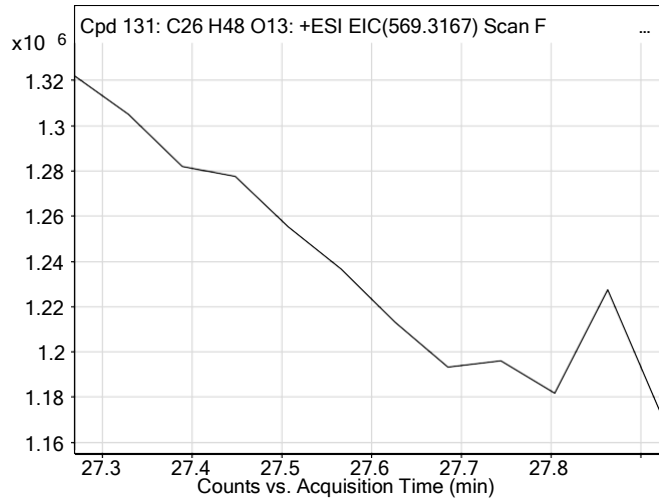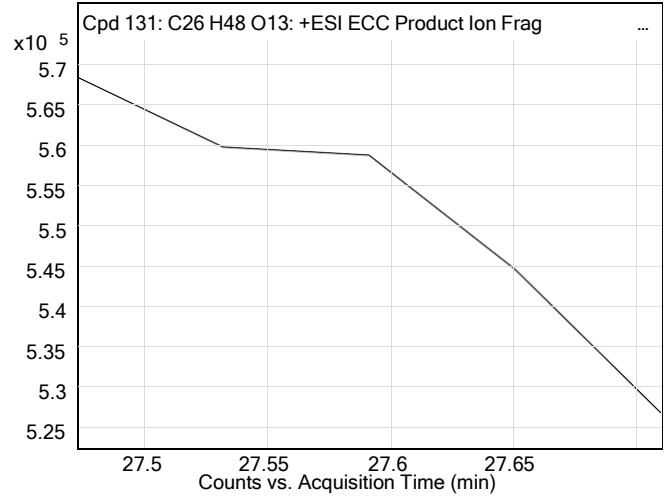

MS Spectrum

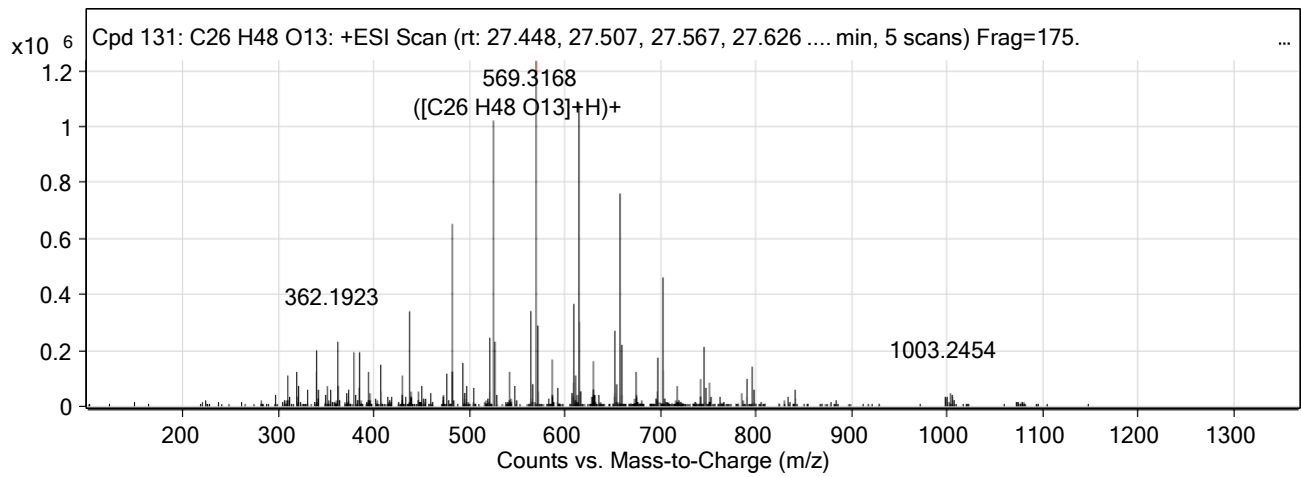

MS Zoomed Spectrum

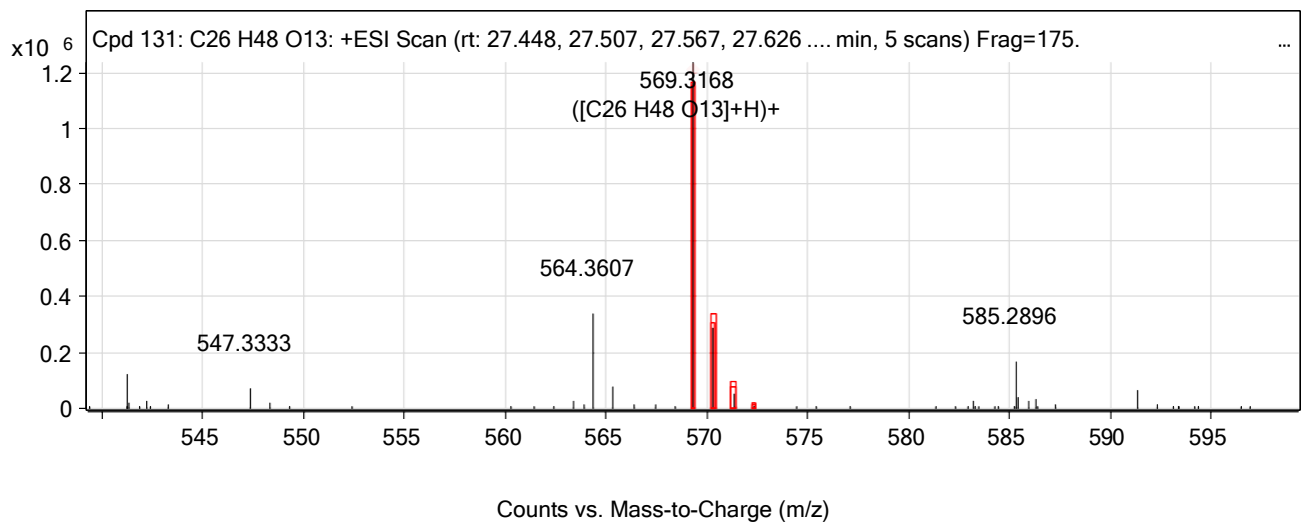

**MS Spectrum Peak List**

| <i>m/z</i> | Calc <i>m/z</i> | Diff(ppm) | z | Abund      | Formula                                         | Ion                |
|------------|-----------------|-----------|---|------------|-------------------------------------------------|--------------------|
| 481.2635   |                 |           | 1 | 650201.56  |                                                 |                    |
| 525.2904   |                 |           | 1 | 1018129.69 |                                                 |                    |
| 569.3168   | 569.3168        | -0.14     | 1 | 1235237.75 | C <sub>26</sub> H <sub>48</sub> O <sub>13</sub> | (M+H) <sup>+</sup> |
| 570.3194   | 570.3202        | 1.48      | 1 | 289762.81  | C <sub>26</sub> H <sub>48</sub> O <sub>13</sub> | (M+H) <sup>+</sup> |
| 571.3213   | 571.3226        | 2.21      | 1 | 50886.73   | C <sub>26</sub> H <sub>48</sub> O <sub>13</sub> | (M+H) <sup>+</sup> |
| 572.3241   | 572.3253        | 2.14      | 1 | 6892.16    | C <sub>26</sub> H <sub>48</sub> O <sub>13</sub> | (M+H) <sup>+</sup> |
| 608.3871   |                 |           | 1 | 363693.88  |                                                 |                    |
| 613.3431   |                 |           | 1 | 1081946.75 |                                                 |                    |
| 657.3692   |                 |           | 1 | 760803.38  |                                                 |                    |

MSMS Spectrum

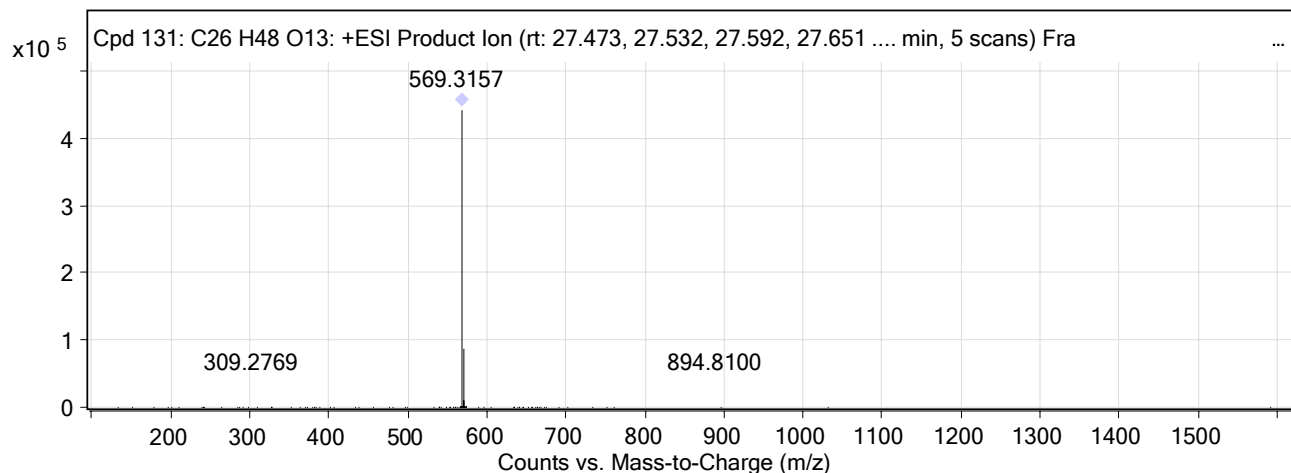

MS/MS Spectrum PeakList

| m/z      | Calc m/z | Diff(ppm) | z | Abund     |
|----------|----------|-----------|---|-----------|
| 133.0864 | 133.0859 | -3.48     |   | 17.54     |
| 283.263  | 283.2632 | 0.49      |   | 15.63     |
| 285.2068 | 285.206  | -2.6      |   | 13.42     |
| 291.2183 | 291.2166 | -6        |   | 12.23     |
| 309.2769 | 309.2788 | 6.16      |   | 22.8      |
| 432.2722 | 432.2718 | -1.06     |   | 13.04     |
| 569.3157 | 569.3168 | 1.83      | 1 | 442308.31 |
| 570.3183 |          |           | 1 | 88089.32  |
| 571.3206 |          |           | 1 | 10556.08  |
| 571.3915 |          |           | 2 | 984.8     |

| Compound Label          | m/z      | RT     | Algorithm  | Mass    |
|-------------------------|----------|--------|------------|---------|
| Cpd 132: C22 H42 N3 O11 | 525.2904 | 27.608 | Auto MS/MS | 524.283 |

Compound Chromatograms

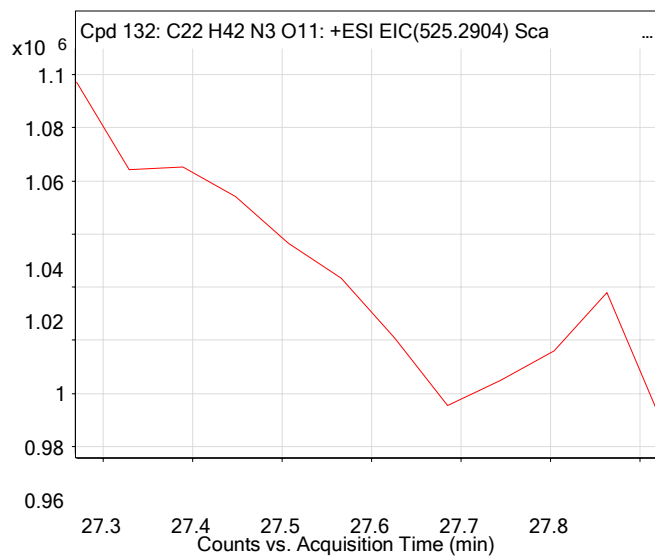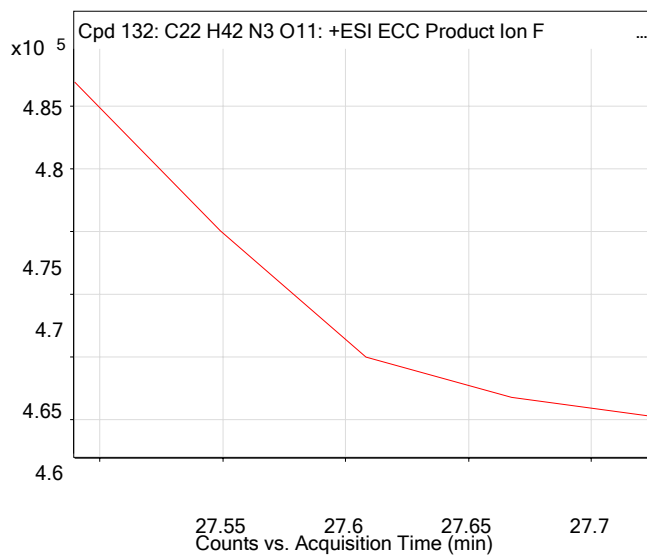

MS Spectrum

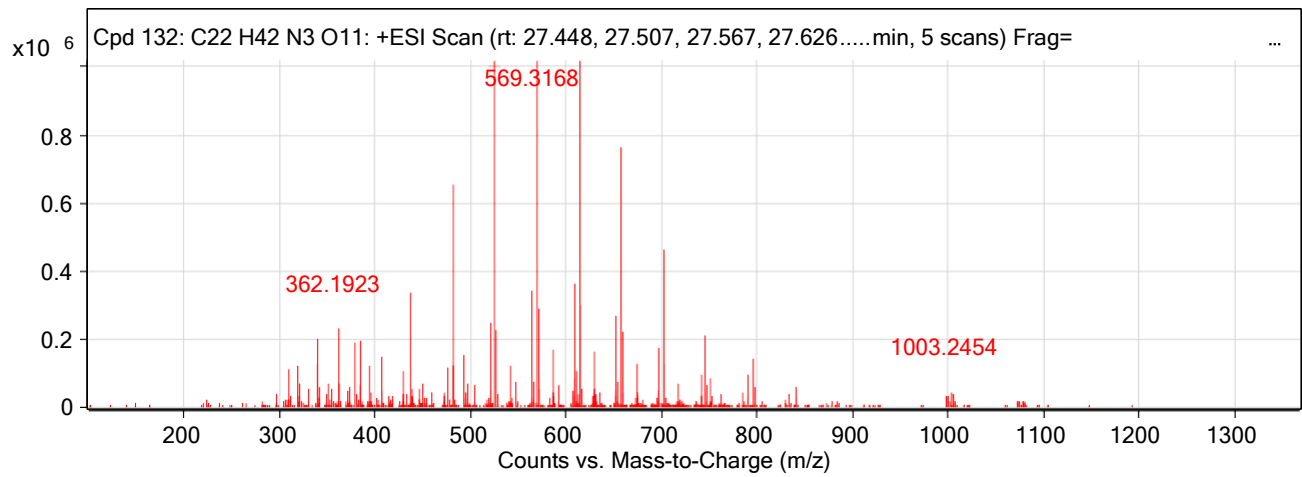

MS Zoomed Spectrum

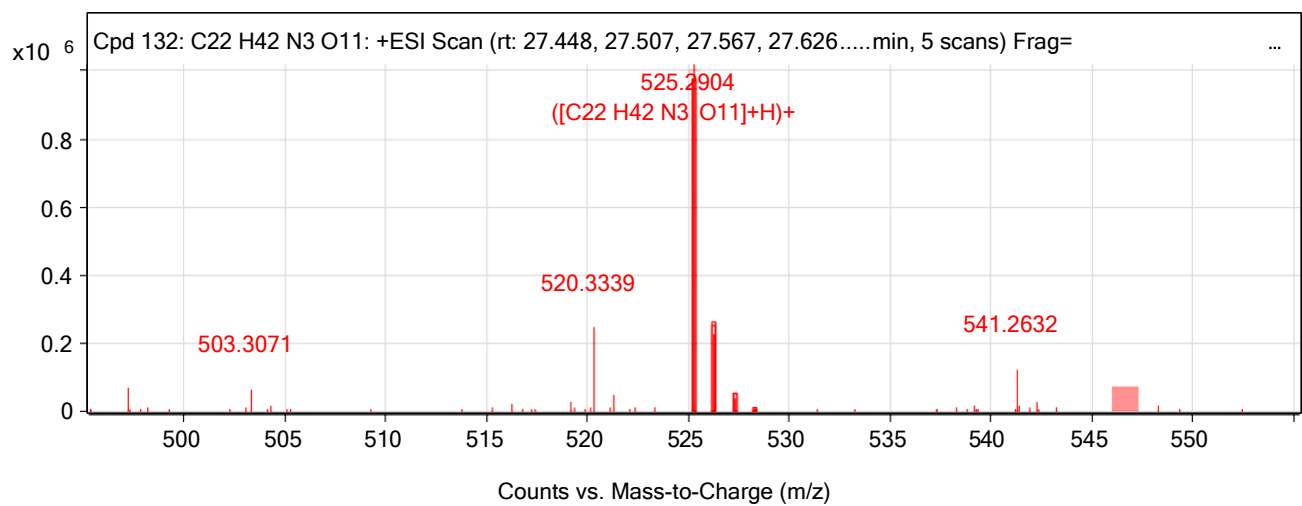

MS Spectrum Peak List

| m/z      | Calc m/z | Diff(ppm) | z | Abund      | Formula        | Ion    |
|----------|----------|-----------|---|------------|----------------|--------|
| 481.2635 |          |           | 1 | 650201.56  |                |        |
| 525.2904 | 525.2892 | -2.22     | 1 | 1018129.69 | C22 H42 N3 O11 | (M+H)+ |
| 526.293  | 526.2924 | -1.29     | 1 | 227756.58  | C22 H42 N3 O11 | (M+H)+ |
| 527.2954 | 527.2947 | -1.33     | 1 | 38335.95   | C22 H42 N3 O11 | (M+H)+ |
| 528.2979 | 528.2972 | -1.26     | 1 | 5128.02    | C22 H42 N3 O11 | (M+H)+ |
| 569.3168 |          |           | 1 | 1235237.75 |                |        |
| 608.3871 |          |           | 1 | 363693.88  |                |        |
| 613.3431 |          |           | 1 | 1081946.75 |                |        |
| 657.3692 |          |           | 1 | 760803.38  |                |        |
| 701.3952 |          |           | 1 | 461156.81  |                |        |

MSMS Spectrum

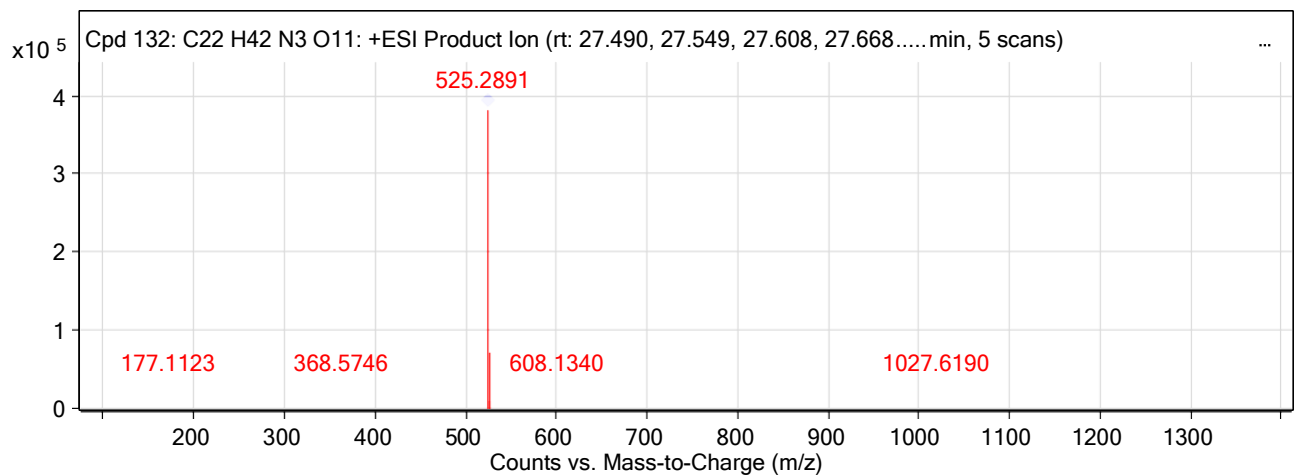



**MS/MS Spectrum Peak List**

| m/z      | Calc m/z | Diff(ppm) | z | Abund     |
|----------|----------|-----------|---|-----------|
| 133.0874 | 133.0886 | 8.76      |   | 15.82     |
| 177.1123 | 177.1121 | -0.94     |   | 32.94     |
| 232.1294 | 232.1292 | -1.11     |   | 24.43     |
| 271.1684 | 271.1652 | -11.74    |   | 12.96     |
| 274.0642 | 274.0643 | 0.29      |   | 11.84     |
| 295.2002 | 295.1989 | -4.42     |   | 10.06     |
| 495.2688 | 495.2674 | -2.86     |   | 25.31     |
| 497.2673 | 497.2705 | 6.31      |   | 13.21     |
| 509.2953 | 509.2943 | -1.94     |   | 39.68     |
| 525.2891 | 525.2892 | 0.16      | 1 | 381051.03 |

| Compound Label          | m/z      | RT     | Algorithm  | Mass     |
|-------------------------|----------|--------|------------|----------|
| Cpd 133: C22 H42 N3 O11 | 525.2899 | 27.845 | Auto MS/MS | 524.2825 |

**Compound Chromatograms**

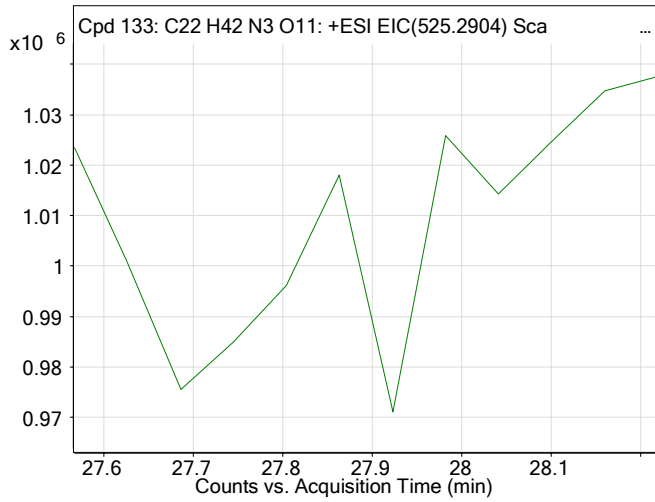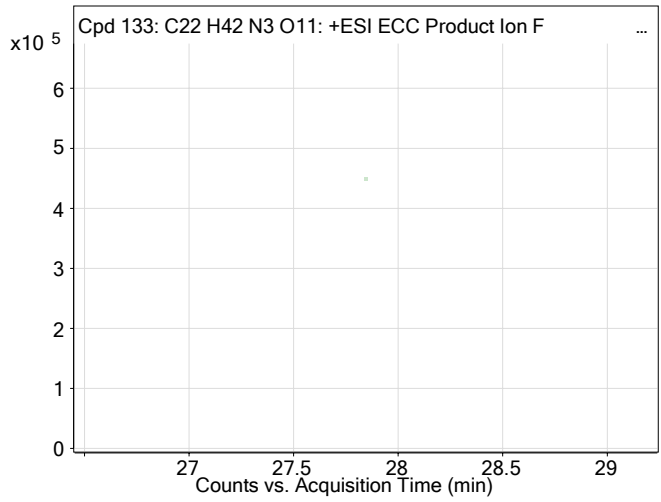

**MS Spectrum**

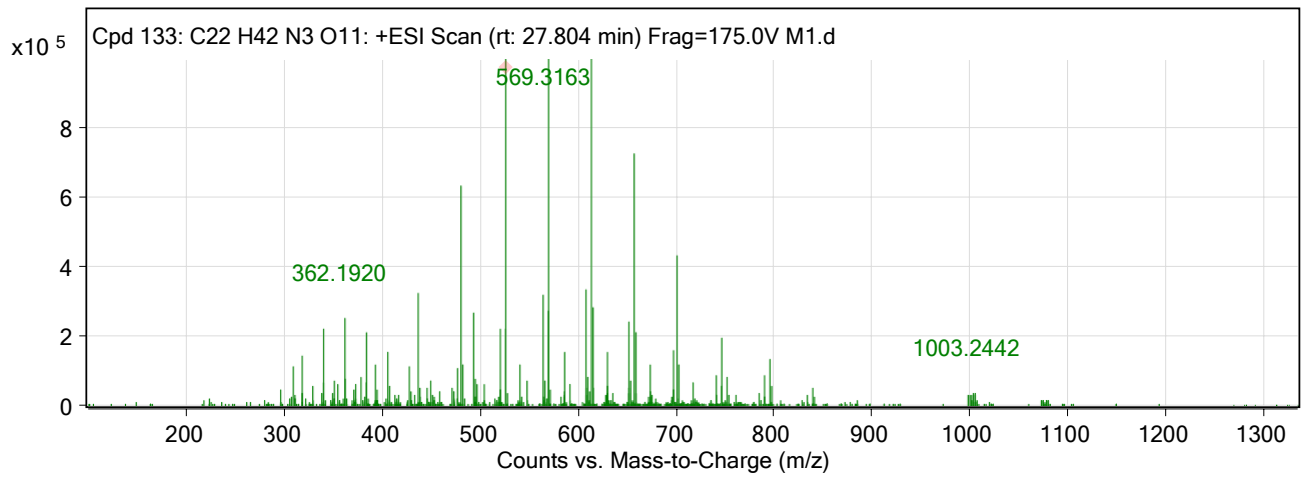

**MS Zoomed Spectrum**

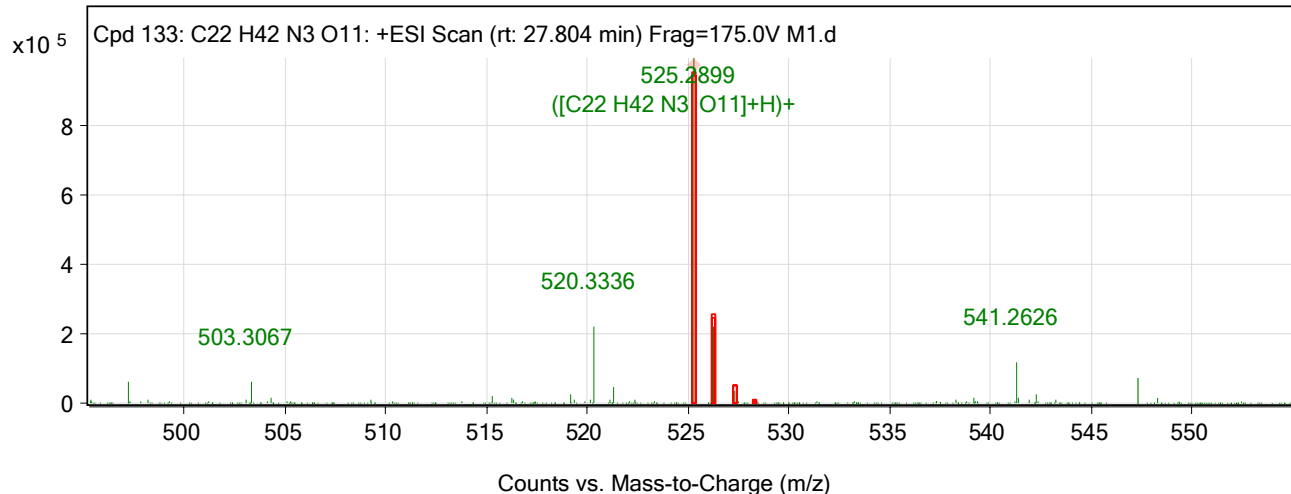

**MS Spectrum Peak List**

| m/z      | Calc m/z | Diff(ppm) | z | Abund      | Formula                                                        | Ion                |
|----------|----------|-----------|---|------------|----------------------------------------------------------------|--------------------|
| 481.2631 |          |           | 1 | 631035.31  |                                                                |                    |
| 525.2899 | 525.2892 | -1.32     | 1 | 996111.56  | C <sub>22</sub> H <sub>42</sub> N <sub>3</sub> O <sub>11</sub> | (M+H) <sup>+</sup> |
| 526.2924 | 526.2924 | -0.04     | 1 | 220428.97  | C <sub>22</sub> H <sub>42</sub> N <sub>3</sub> O <sub>11</sub> | (M+H) <sup>+</sup> |
| 527.295  | 527.2947 | -0.68     | 1 | 37314.72   | C <sub>22</sub> H <sub>42</sub> N <sub>3</sub> O <sub>11</sub> | (M+H) <sup>+</sup> |
| 528.2977 | 528.2972 | -0.97     | 1 | 4870.87    | C <sub>22</sub> H <sub>42</sub> N <sub>3</sub> O <sub>11</sub> | (M+H) <sup>+</sup> |
| 569.3163 |          |           | 1 | 1181843.88 |                                                                |                    |
| 608.3865 |          |           | 1 | 334313.59  |                                                                |                    |
| 613.3425 |          |           | 1 | 1033361.69 |                                                                |                    |
| 657.3686 |          |           | 1 | 723454.56  |                                                                |                    |
| 701.3946 |          |           | 1 | 432939.5   |                                                                |                    |

MSMS Spectrum

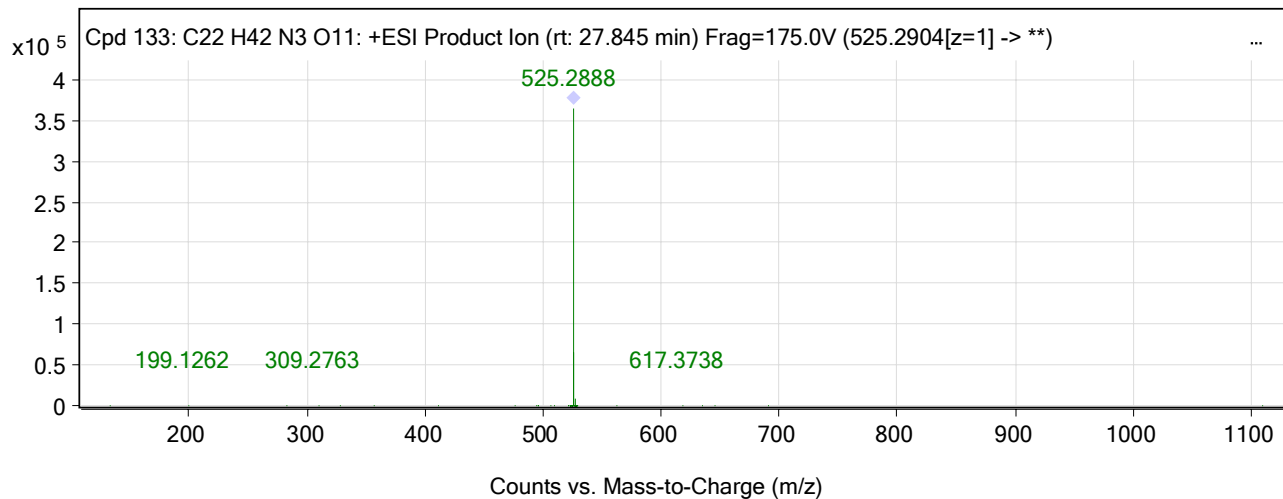

**MS/MS Spectrum Peak List**

| m/z      | Calc m/z | Diff(ppm) | z | Abund     |
|----------|----------|-----------|---|-----------|
| 133.0871 | 133.0859 | -9.22     |   | 54        |
| 199.1262 | 199.1315 | 26.58     |   | 46.62     |
| 283.1759 | 283.1778 | 6.63      |   | 54.86     |
| 309.2763 | 309.2775 | 3.74      |   | 69.73     |
| 327.1944 | 327.1914 | -9.03     |   | 39.45     |
| 494.2744 | 494.2708 | -7.19     | 1 | 88.88     |
| 509.2927 | 509.2943 | 3.21      |   | 138.46    |
| 525.2888 | 525.2892 | 0.88      | 1 | 365067.47 |
| 526.2916 |          |           | 1 | 66137.36  |
| 527.2944 |          |           | 1 | 8798.19   |

| Compound Label                                           | m/z      | RT     | Algorithm  | Mass     |
|----------------------------------------------------------|----------|--------|------------|----------|
| Cpd 134: C <sub>26</sub> H <sub>48</sub> O <sub>13</sub> | 569.3169 | 27.888 | Auto MS/MS | 568.3094 |

Compound Chromatograms

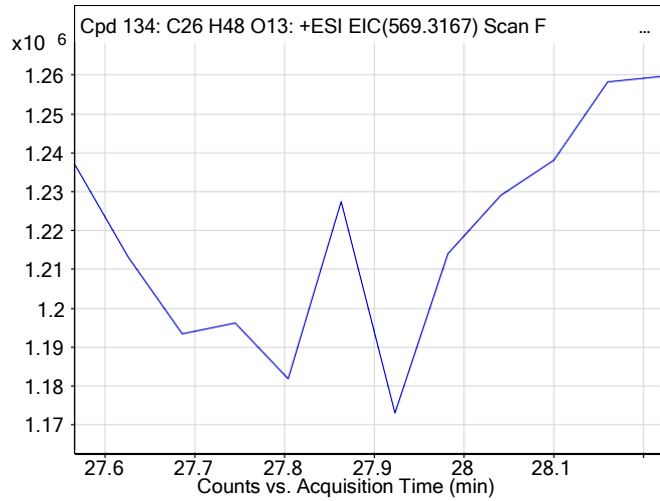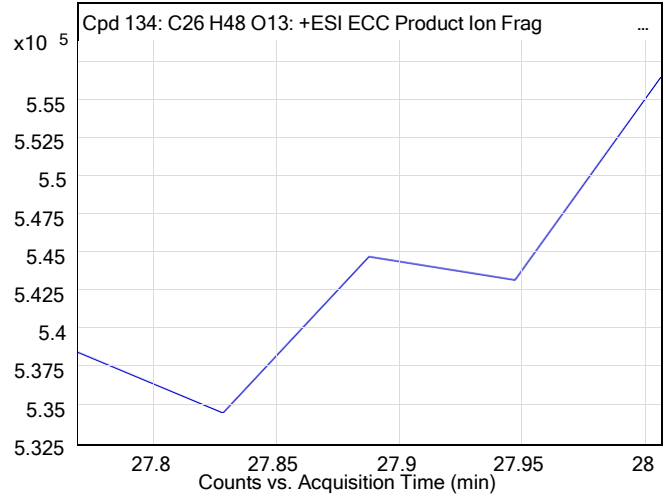

MS Spectrum

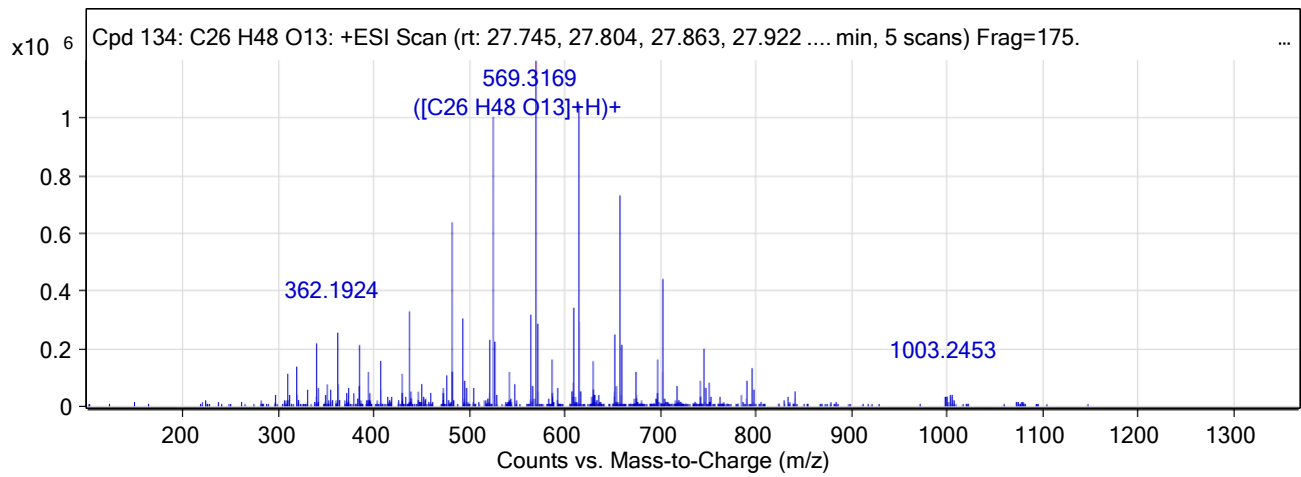

MS Zoomed Spectrum

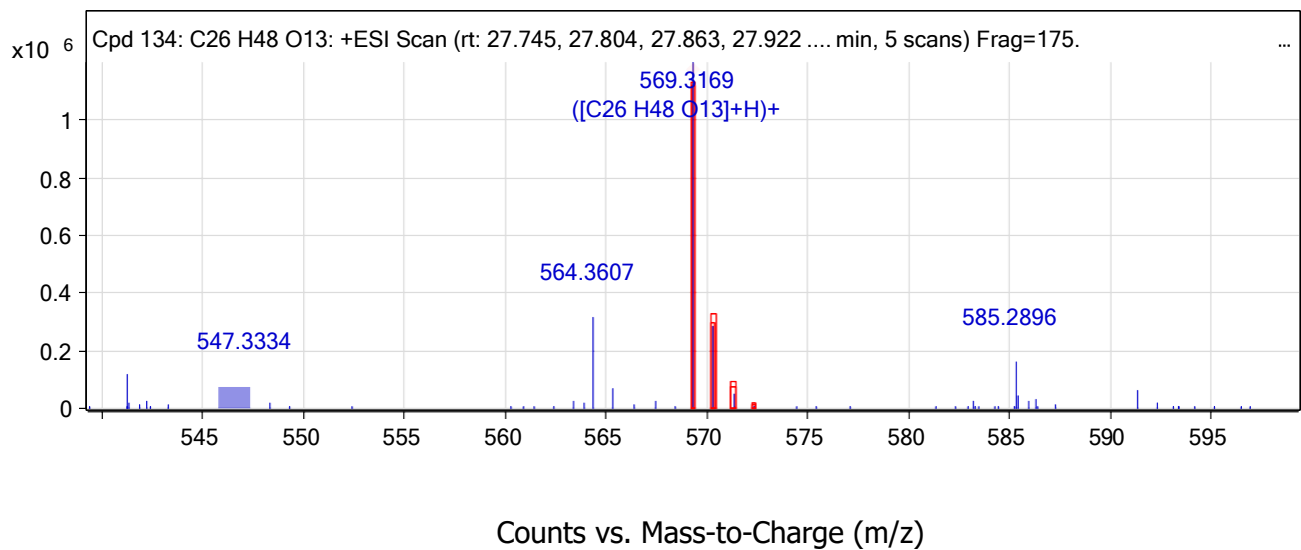

MS Spectrum Peak List

| <i>m/z</i> | Calc <i>m/z</i> | Diff(ppm) | z | Abund      | Formula                                         | Ion                |
|------------|-----------------|-----------|---|------------|-------------------------------------------------|--------------------|
| 481.2635   |                 |           | 1 | 636826.44  |                                                 |                    |
| 525.2904   |                 |           | 1 | 999235.63  |                                                 |                    |
| 569.3169   | 569.3168        | -0.2      | 1 | 1198499.25 | C <sub>26</sub> H <sub>48</sub> O <sub>13</sub> | (M+H) <sup>+</sup> |
| 570.3194   | 570.3202        | 1.44      | 1 | 281516.69  | C <sub>26</sub> H <sub>48</sub> O <sub>13</sub> | (M+H) <sup>+</sup> |
| 571.3213   | 571.3226        | 2.33      | 1 | 48971.41   | C <sub>26</sub> H <sub>48</sub> O <sub>13</sub> | (M+H) <sup>+</sup> |
| 572.324    | 572.3253        | 2.32      | 1 | 6754.69    | C <sub>26</sub> H <sub>48</sub> O <sub>13</sub> | (M+H) <sup>+</sup> |
| 608.3871   |                 |           | 1 | 341391.47  |                                                 |                    |
| 613.3431   |                 |           | 1 | 1047000.38 |                                                 |                    |
| 657.3692   |                 |           | 1 | 730526.63  |                                                 |                    |

MSMS Spectrum

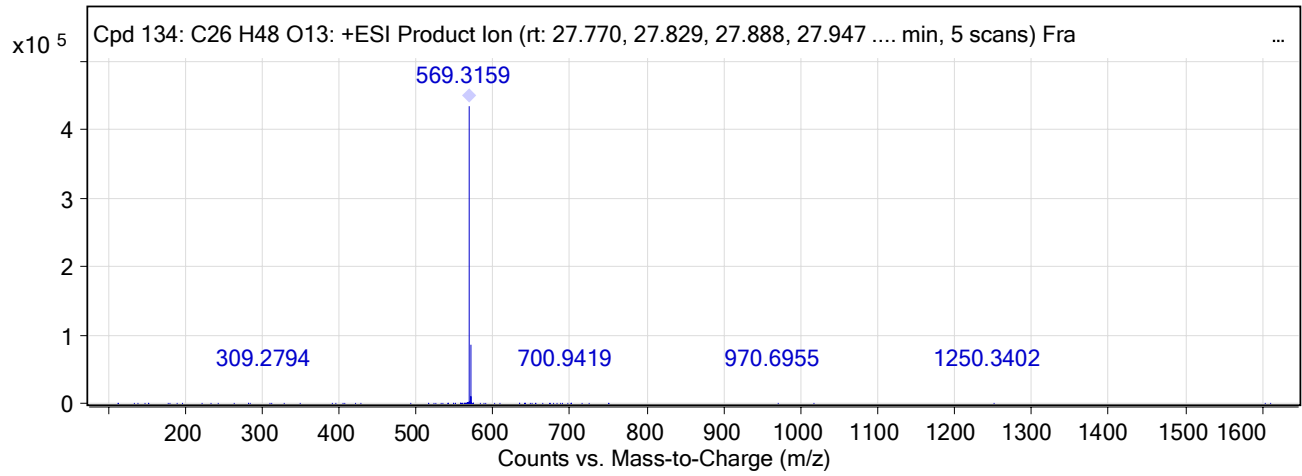

MS/MS Spectrum PeakList

| m/z      | Calc m/z | Diff(ppm) | z | Abund     |
|----------|----------|-----------|---|-----------|
| 113.0987 | 113.0961 | -23.19    |   | 14.41     |
| 133.086  | 133.0859 | -0.81     |   | 60.75     |
| 177.1112 | 177.1121 | 5.19      |   | 15.96     |
| 188.1026 | 188.1043 | 9.13      |   | 14.87     |
| 263.1908 | 263.1853 | -20.95    |   | 25.96     |
| 283.2691 | 283.2632 | -20.85    |   | 16.02     |
| 309.2794 | 309.2788 | -2.04     |   | 40.3      |
| 311.2952 | 311.2945 | -2.45     |   | 29.36     |
| 523.2823 | 523.2749 | -14.11    |   | 13.45     |
| 569.3159 | 569.3168 | 1.58      | 1 | 434960.31 |

| Compound Label       | m/z      | RT     | Algorithm  | Mass     |
|----------------------|----------|--------|------------|----------|
| Cpd 135: C28 H52 O14 | 613.3433 | 27.905 | Auto MS/MS | 612.3358 |

Compound Chromatograms

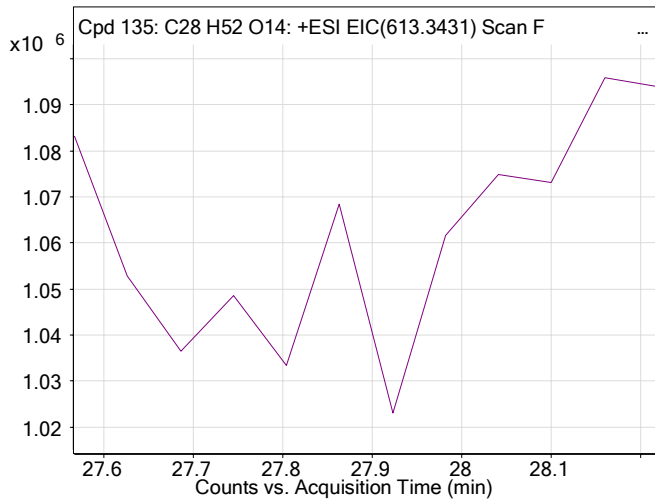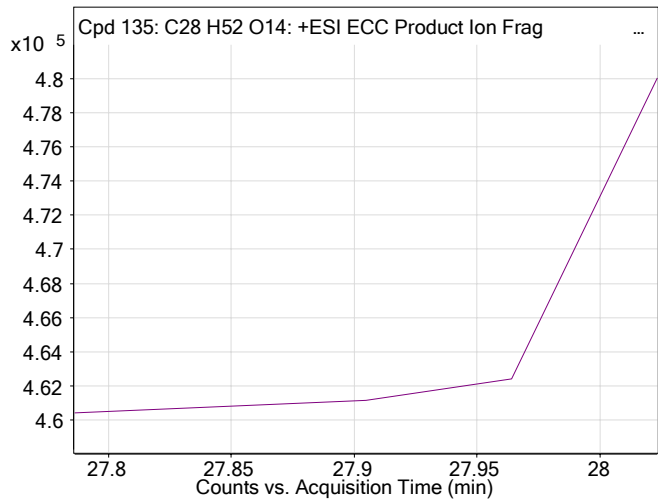

MS Spectrum

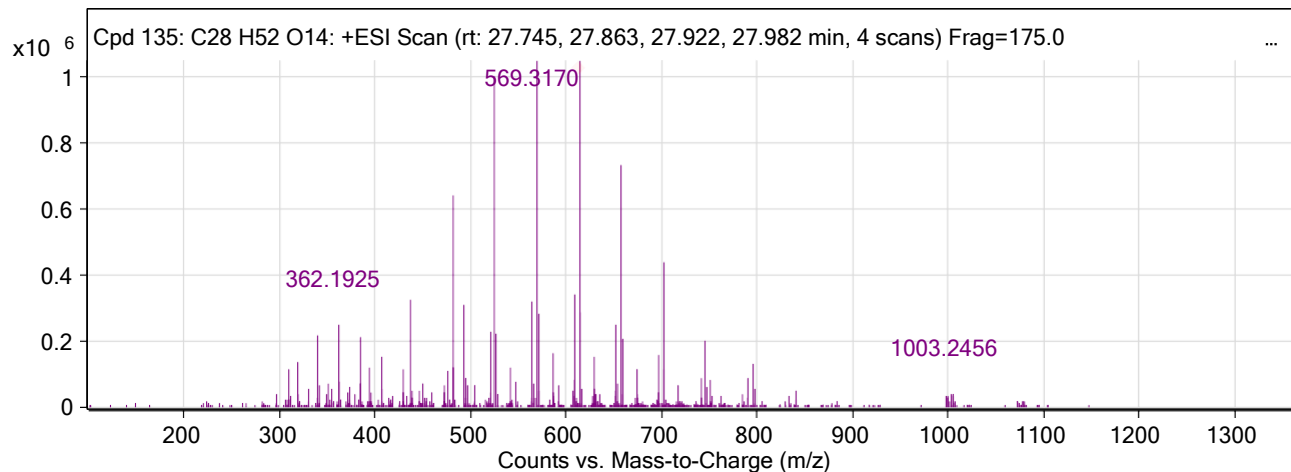

MS Zoomed Spectrum

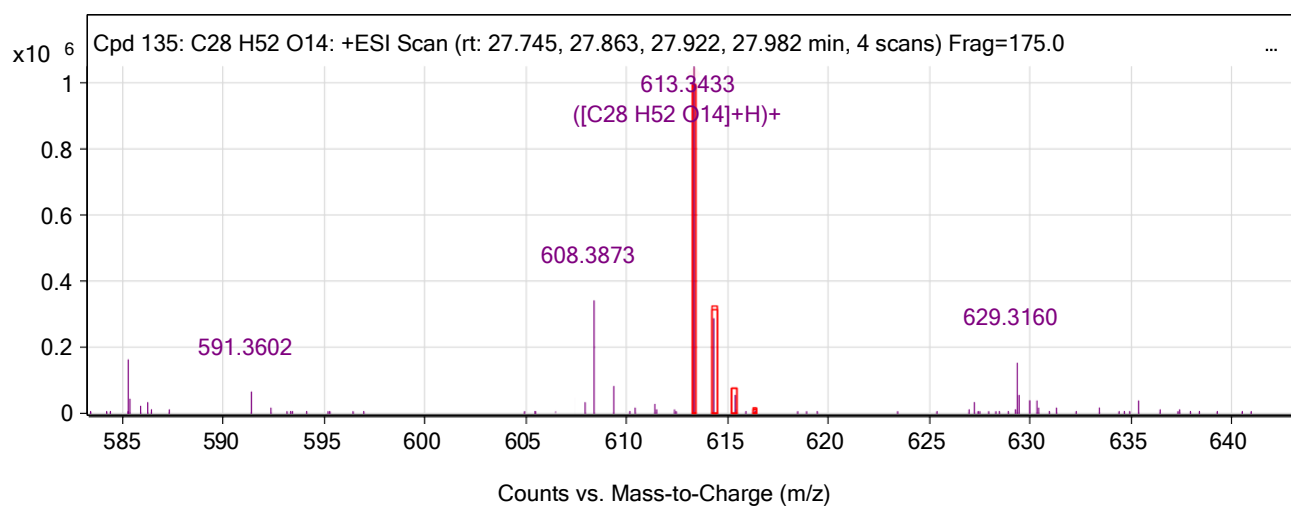

MS Spectrum Peak List

| m/z      | Calc m/z | Diff(ppm) | z | Abund      | Formula                                         | Ion    |
|----------|----------|-----------|---|------------|-------------------------------------------------|--------|
| 481.2636 |          |           | 1 | 638274.25  |                                                 |        |
| 525.2905 |          |           | 1 | 1000016.56 |                                                 |        |
| 569.317  |          |           | 1 | 1202663    |                                                 |        |
| 608.3873 |          |           | 1 | 343160.94  |                                                 |        |
| 613.3433 | 613.343  | -0.49     | 1 | 1050410.13 | C <sub>28</sub> H <sub>52</sub> O <sub>14</sub> | (M+H)+ |
| 614.3459 | 614.3464 | 0.83      | 1 | 289136.91  | C <sub>28</sub> H <sub>52</sub> O <sub>14</sub> | (M+H)+ |
| 615.3478 | 615.3489 | 1.75      | 1 | 52068.78   | C <sub>28</sub> H <sub>52</sub> O <sub>14</sub> | (M+H)+ |
| 616.3511 | 616.3515 | 0.65      | 1 | 7165.96    | C <sub>28</sub> H <sub>52</sub> O <sub>14</sub> | (M+H)+ |
| 657.3694 |          |           | 1 | 732294.69  |                                                 |        |
| 701.3954 |          |           | 1 | 438203.56  |                                                 |        |

MSMS Spectrum

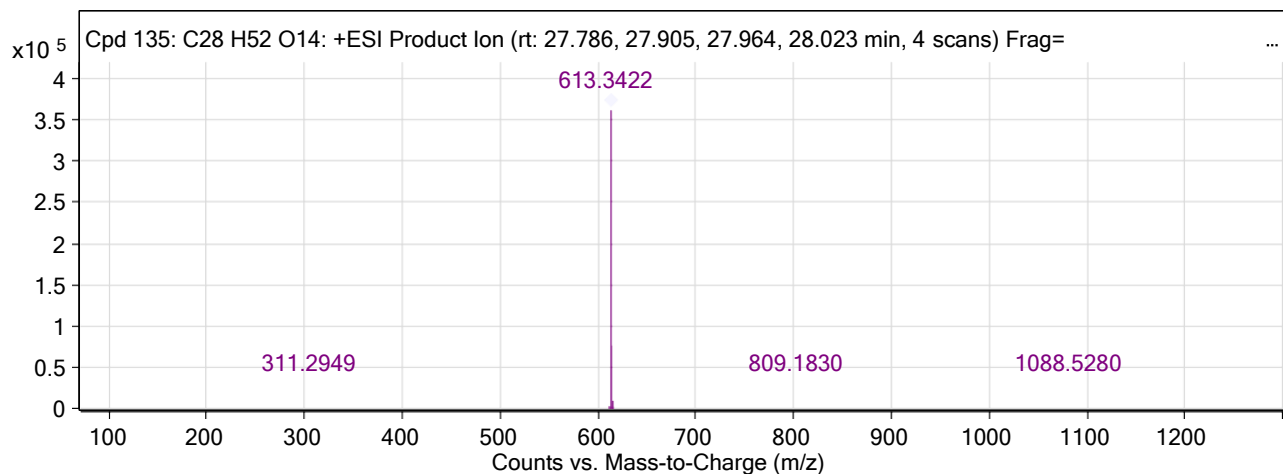

**MS/MS Spectrum Peak List**

| m/z      | Calc m/z | Diff(ppm) | z | Abund     |
|----------|----------|-----------|---|-----------|
| 133.0863 | 133.0859 | -2.58     |   | 52.94     |
| 309.2768 | 309.2788 | 6.57      |   | 62.56     |
| 311.2949 | 311.2945 | -1.56     |   | 66.78     |
| 391.2723 | 391.269  | -8.42     |   | 15.97     |
| 582.322  | 582.3246 | 4.4       |   | 18.52     |
| 612.3936 |          |           | 2 | 2536.95   |
| 613.3422 | 613.343  | 1.2       | 1 | 361481.13 |
| 614.345  |          |           | 1 | 76010.47  |
| 615.3472 |          |           | 1 | 9005.79   |
| 615.4155 |          |           | 2 | 1973.06   |

| Compound Label       | m/z      | RT     | Algorithm  | Mass     |
|----------------------|----------|--------|------------|----------|
| Cpd 136: C26 H48 O13 | 569.3171 | 28.185 | Auto MS/MS | 568.3096 |

**Compound Chromatograms**

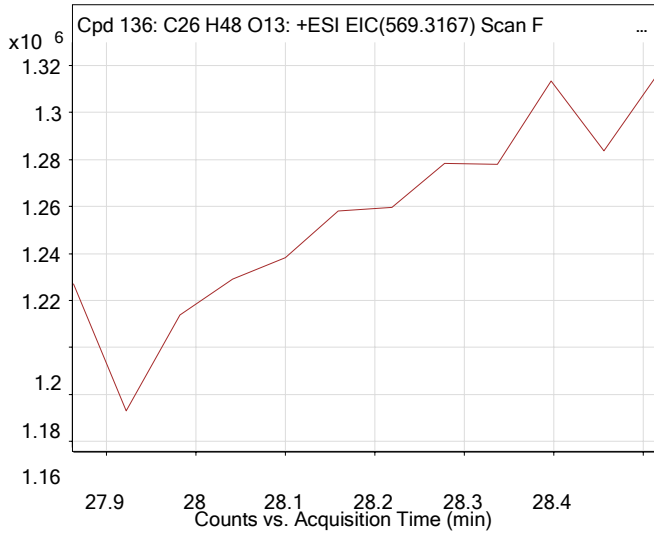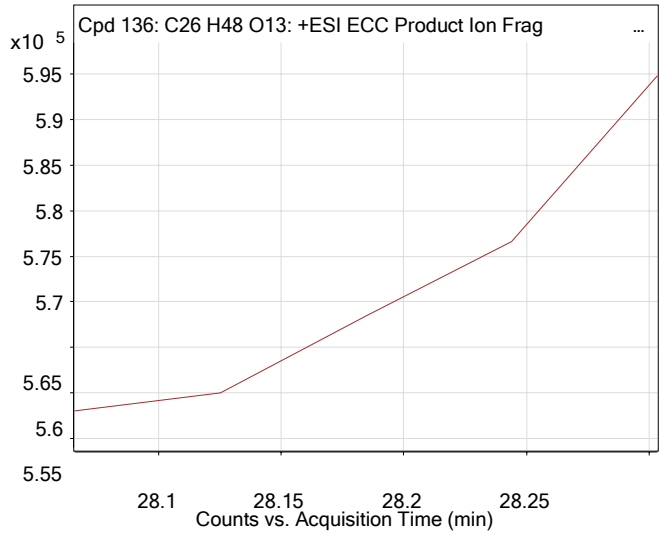

**MS Spectrum**

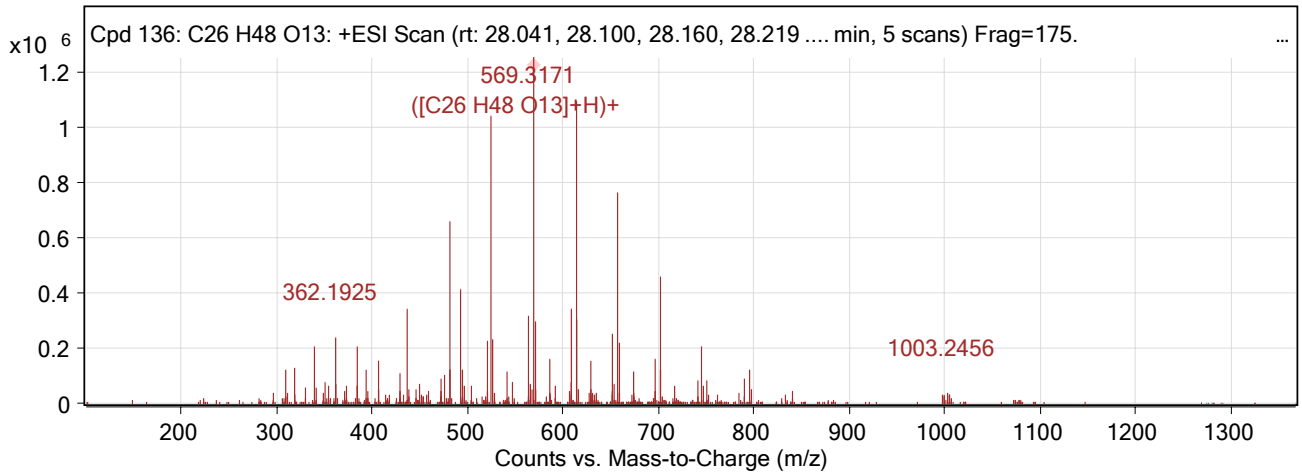

**MS Zoomed Spectrum**

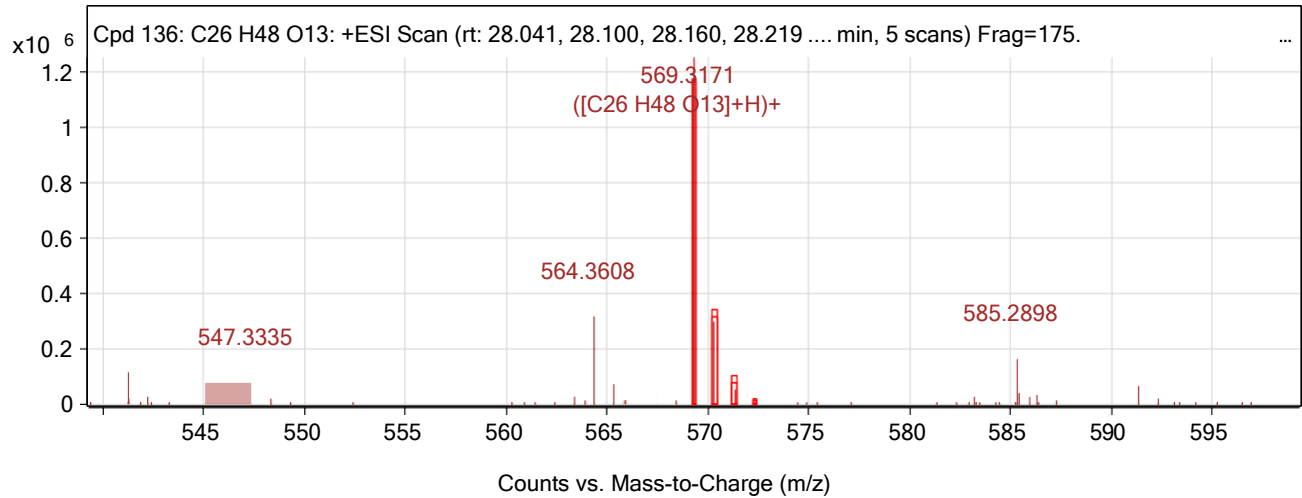

**MS Spectrum Peak List**

| m/z      | Calc m/z | Diff(ppm) | z | Abund      | Formula                                         | Ion    |
|----------|----------|-----------|---|------------|-------------------------------------------------|--------|
| 481.2637 |          |           | 1 | 661945.88  |                                                 |        |
| 493.3304 |          |           | 1 | 415486.88  |                                                 |        |
| 525.2905 |          |           | 1 | 1038701.5  |                                                 |        |
| 569.3171 | 569.3168 | -0.52     | 1 | 1252734.75 | C <sub>26</sub> H <sub>48</sub> O <sub>13</sub> | (M+H)+ |
| 570.3196 | 570.3202 | 1.09      | 1 | 296272.19  | C <sub>26</sub> H <sub>48</sub> O <sub>13</sub> | (M+H)+ |
| 571.3215 | 571.3226 | 1.91      | 1 | 50838.63   | C <sub>26</sub> H <sub>48</sub> O <sub>13</sub> | (M+H)+ |
| 572.3243 | 572.3253 | 1.65      | 1 | 7312.69    | C <sub>26</sub> H <sub>48</sub> O <sub>13</sub> | (M+H)+ |
| 613.3433 |          |           | 1 | 1090813.75 |                                                 |        |
| 657.3694 |          |           | 1 | 759701.81  |                                                 |        |
| 701.3954 |          |           | 1 | 457605.75  |                                                 |        |

MSMS Spectrum

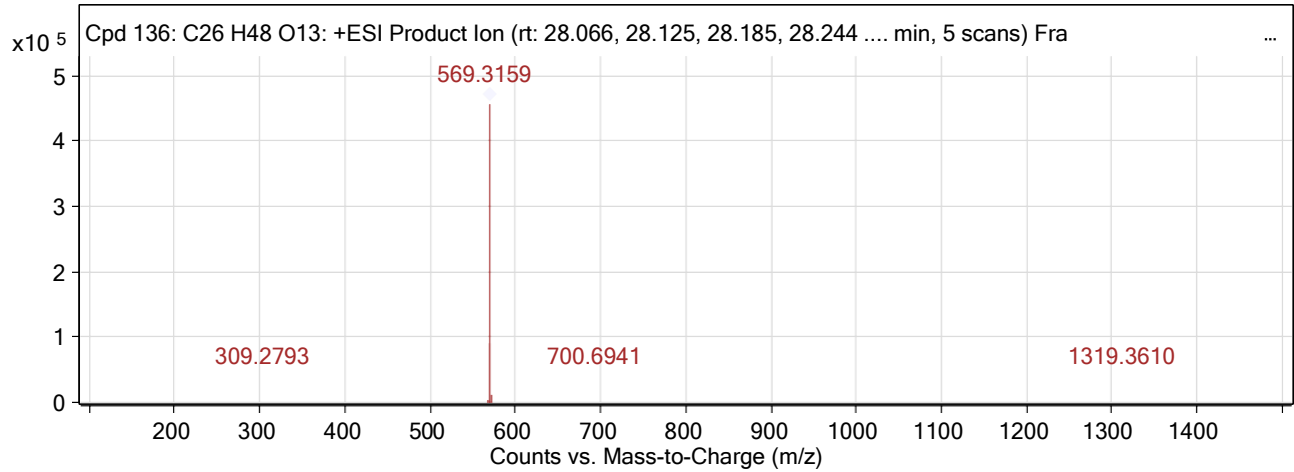

**MS/MS Spectrum Peak List**

| m/z      | Calc m/z | Diff(ppm)  | z | Abund     |
|----------|----------|------------|---|-----------|
| 133.0882 | 133.0859 | -17.34     |   | 11.35     |
| 188.1034 | 188.1043 | 4.73       |   | 18.08     |
| 221.1398 | 221.1384 | -6.64      |   | 14.19     |
| 231.1955 | 231.1955 | -0.11      |   | 10.81     |
| 309.2793 | 309.2788 | -1.54      |   | 39.13     |
| 311.2946 | 311.2945 | -0.47      |   | 26.47     |
| 329.2309 | 329.2323 | 4.12       |   | 11.07     |
| 509.2902 | 509.2956 | 10.75      |   | 11.34     |
| 566.2953 | 283.1464 | -500002.28 | 2 | 30.85     |
| 569.3159 | 569.3168 | 1.51       | 1 | 456134.41 |

| Compound Label                                           | m/z      | RT     | Algorithm  | Mass     |
|----------------------------------------------------------|----------|--------|------------|----------|
| Cpd 137: C <sub>28</sub> H <sub>52</sub> O <sub>14</sub> | 613.3433 | 28.201 | Auto MS/MS | 612.3358 |

Compound Chromatograms



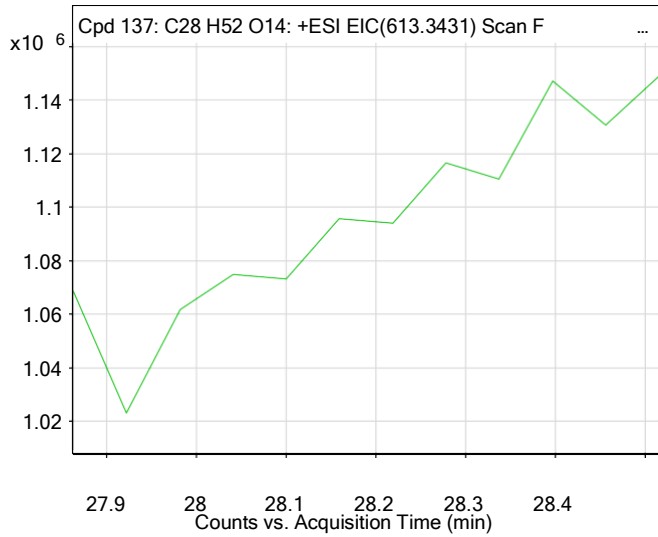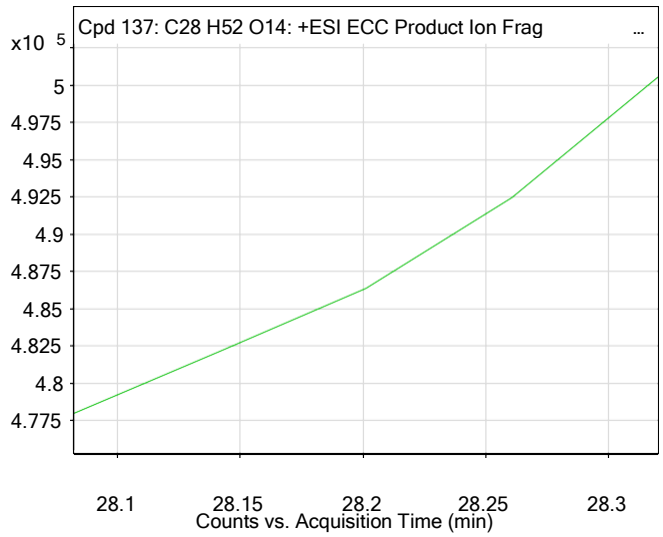

MS Spectrum

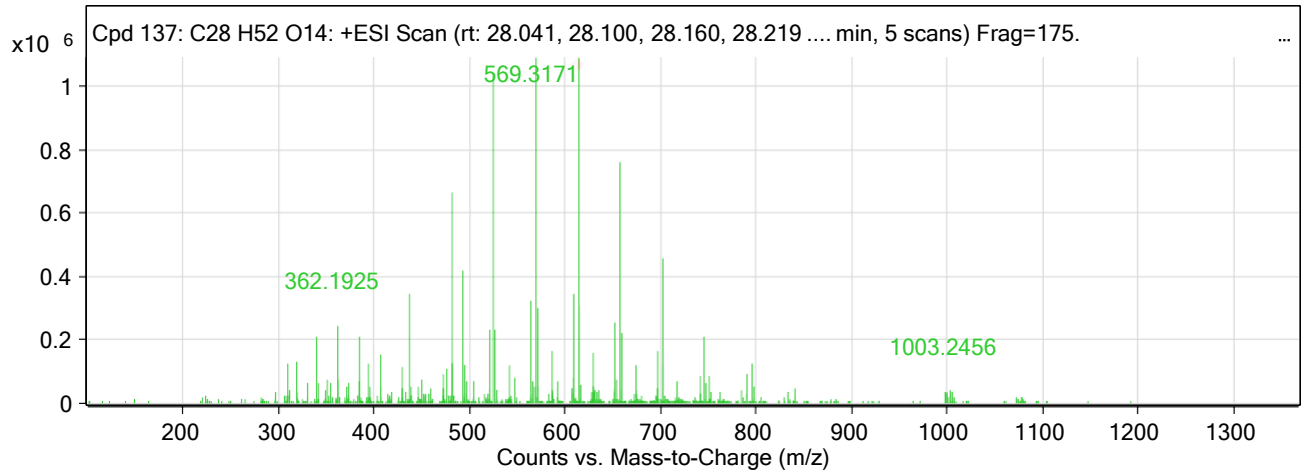

MS Zoomed Spectrum

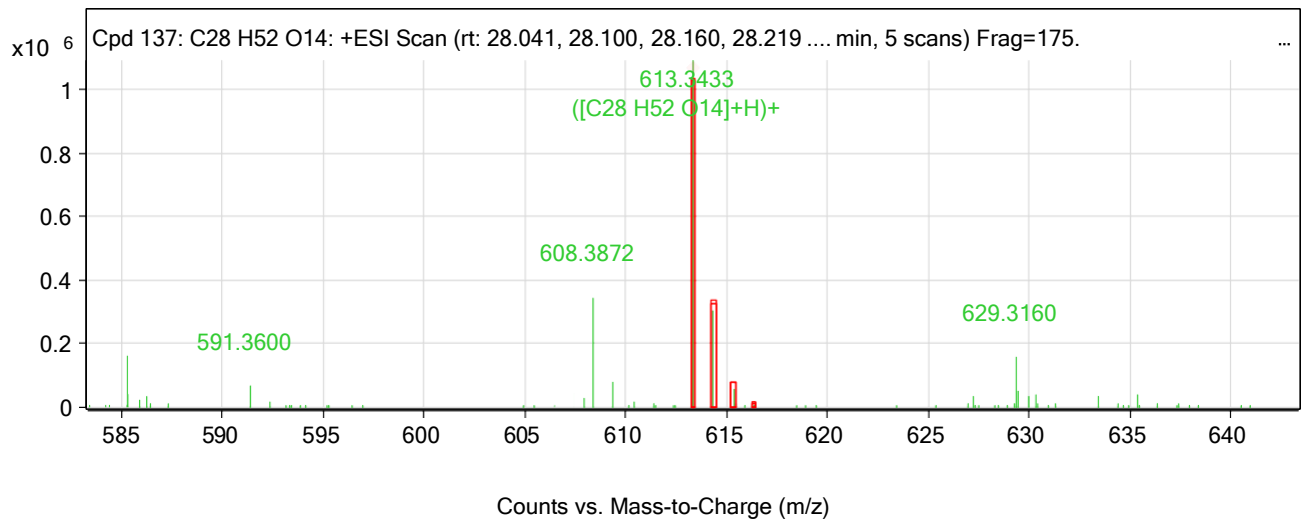

MS Spectrum Peak List

| m/z      | Calc m/z | Diff(ppm) | z | Abund      | Formula     | Ion    |
|----------|----------|-----------|---|------------|-------------|--------|
| 481.2637 |          |           | 1 | 661945.88  |             |        |
| 525.2905 |          |           | 1 | 1038701.5  |             |        |
| 569.3171 |          |           | 1 | 1252734.75 |             |        |
| 613.3433 | 613.343  | -0.55     | 1 | 1090813.75 | C28 H52 O14 | (M+H)+ |
| 614.3459 | 614.3464 | 0.76      | 1 | 302955.56  | C28 H52 O14 | (M+H)+ |
| 615.3478 | 615.3489 | 1.79      | 1 | 54592.06   | C28 H52 O14 | (M+H)+ |
| 616.3513 | 616.3515 | 0.38      | 1 | 7386.11    | C28 H52 O14 | (M+H)+ |
| 617.3635 | 617.354  | -15.31    | 1 | 1396.1     | C28 H52 O14 | (M+H)+ |
| 657.3694 |          |           | 1 | 759701.81  |             |        |

MSMS Spectrum

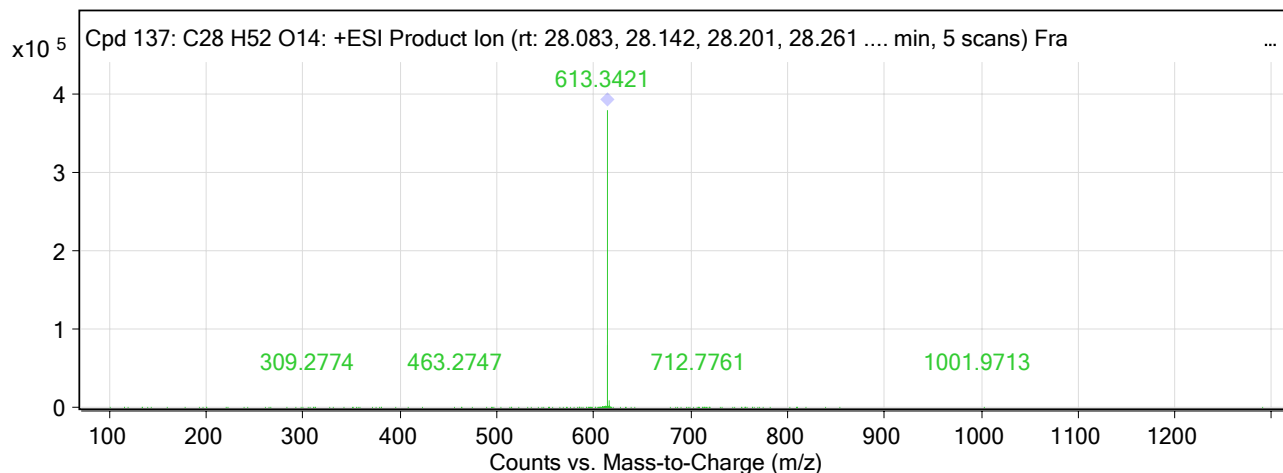

MS/MS Spectrum Peak List

| m/z      | Calc m/z | Diff(ppm)  | z | Abund     |
|----------|----------|------------|---|-----------|
| 115.0769 | 115.0754 | -13.36     |   | 14.81     |
| 133.0856 | 133.0859 | 2.19       |   | 40.22     |
| 177.114  | 177.1121 | -10.42     |   | 17.02     |
| 199.1311 | 199.1329 | 8.73       |   | 13.61     |
| 309.1916 | 309.1908 | -2.64      |   | 15.08     |
| 309.2774 | 309.2788 | 4.44       |   | 97.68     |
| 311.295  | 311.2945 | -1.63      | 1 | 44.14     |
| 597.3439 | 597.3481 | 7.05       |   | 14.01     |
| 610.3129 | 305.1595 | -499995.06 | 2 | 58.24     |
| 613.3421 | 613.343  | 1.43       | 1 | 380161.84 |

| Compound Label       | m/z     | RT     | Algorithm  | Mass     |
|----------------------|---------|--------|------------|----------|
| Cpd 138: C26 H48 O13 | 569.317 | 28.481 | Auto MS/MS | 568.3095 |

Compound Chromatograms

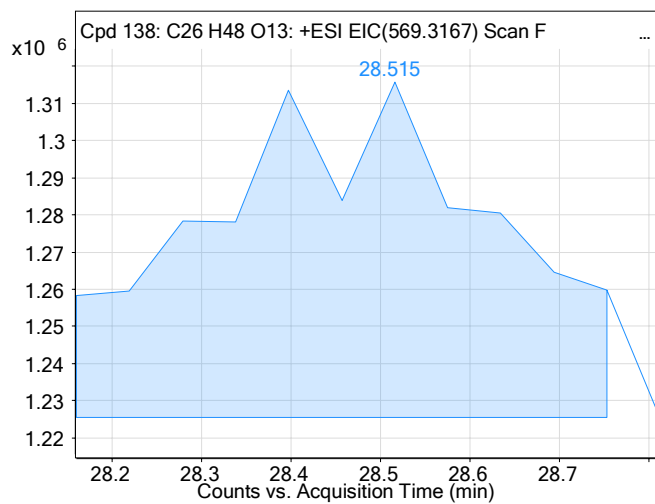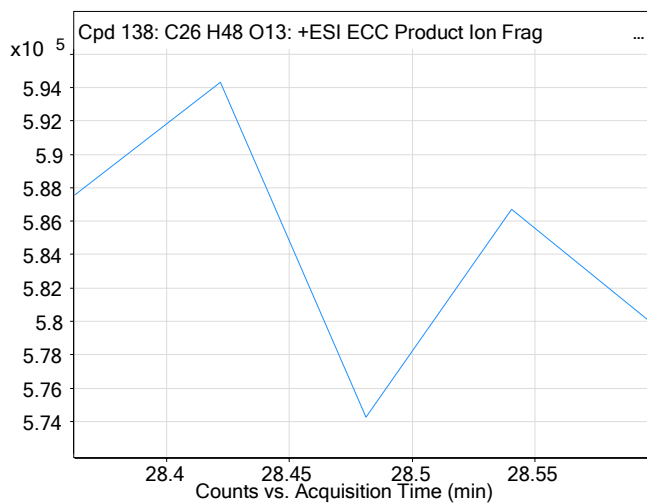

MS Spectrum

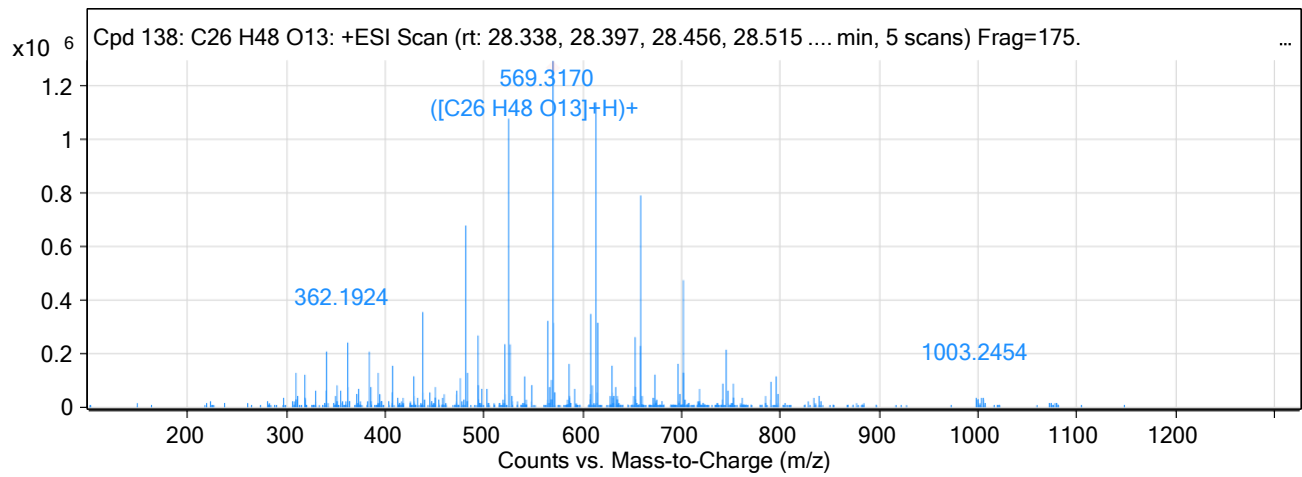

MS Zoomed Spectrum

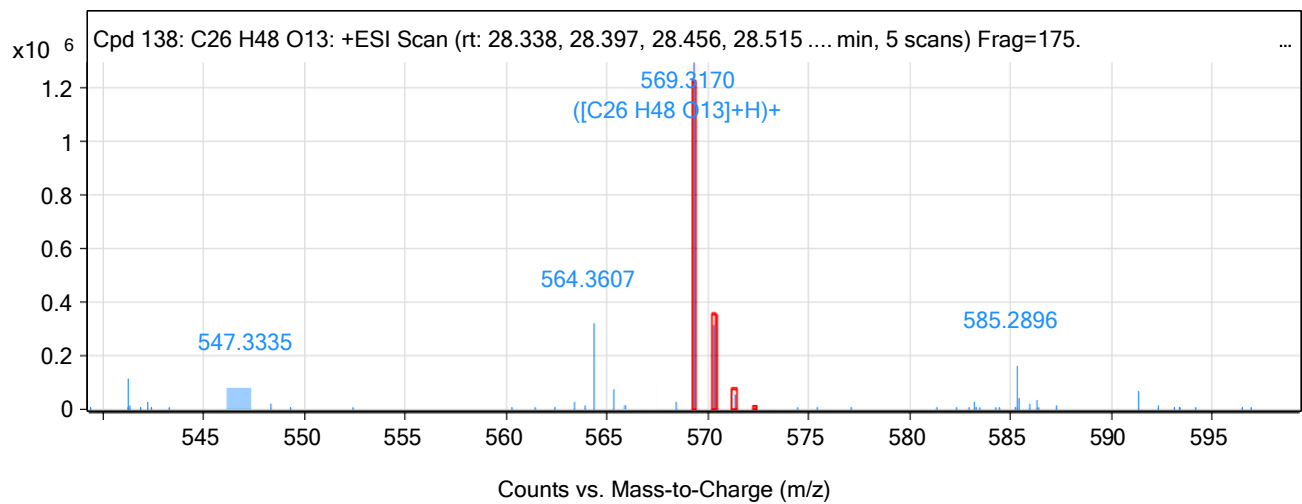

MS Spectrum Peak List

| m/z      | Calc m/z | Diff(ppm) | z | Abund      | Formula                                         | Ion                |
|----------|----------|-----------|---|------------|-------------------------------------------------|--------------------|
| 437.2371 |          |           | 1 | 351094.56  |                                                 |                    |
| 481.2635 |          |           | 1 | 672225.38  |                                                 |                    |
| 525.2904 |          |           | 1 | 1074061.88 |                                                 |                    |
| 569.317  | 569.3168 | -0.36     | 1 | 1294616.38 | C <sub>26</sub> H <sub>48</sub> O <sub>13</sub> | (M+H) <sup>+</sup> |
| 570.3195 | 570.3202 | 1.3       | 1 | 315245.41  | C <sub>26</sub> H <sub>48</sub> O <sub>13</sub> | (M+H) <sup>+</sup> |
| 571.3215 | 571.3226 | 1.9       | 1 | 53240.99   | C <sub>26</sub> H <sub>48</sub> O <sub>13</sub> | (M+H) <sup>+</sup> |
| 572.324  | 572.3253 | 2.32      | 1 | 7472.94    | C <sub>26</sub> H <sub>48</sub> O <sub>13</sub> | (M+H) <sup>+</sup> |
| 613.3432 |          |           | 1 | 1132630.5  |                                                 |                    |
| 657.3693 |          |           | 1 | 787210.19  |                                                 |                    |
| 701.3953 |          |           | 1 | 474025.66  |                                                 |                    |

MSMS Spectrum

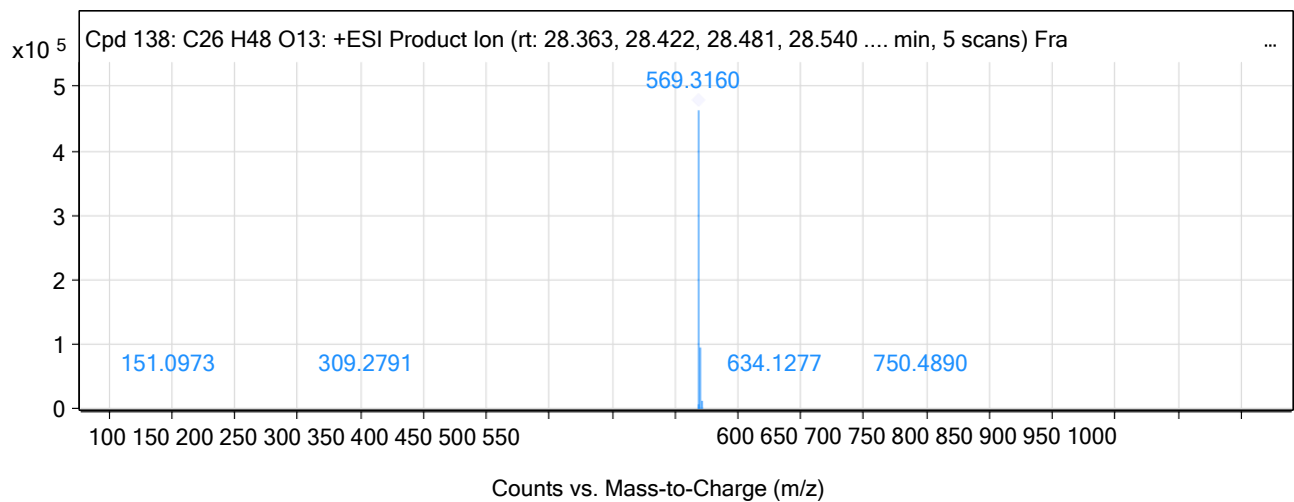

**MS/MS Spectrum Peak List**

| m/z      | Calc m/z | Diff(ppm) | z | Abund     |
|----------|----------|-----------|---|-----------|
| 133.0872 | 133.0859 | -9.52     |   | 23.06     |
| 177.1113 | 177.1121 | 4.87      |   | 12.54     |
| 188.1023 | 188.1043 | 10.88     |   | 27.73     |
| 252.1655 | 252.172  | 25.89     |   | 13.63     |
| 309.2791 | 309.2788 | -1        |   | 49.22     |
| 311.2954 | 311.2945 | -2.92     |   | 40.97     |
| 329.2277 | 329.2323 | 13.84     |   | 12.59     |
| 497.268  | 497.2593 | -17.54    |   | 22.54     |
| 539.3034 | 539.3062 | 5.15      |   | 13.97     |
| 569.316  | 569.3168 | 1.32      | 1 | 462977.09 |

| Compound Label       | m/z      | RT     | Algorithm  | Mass     |
|----------------------|----------|--------|------------|----------|
| Cpd 139: C28 H52 O14 | 613.3432 | 28.498 | Auto MS/MS | 612.3357 |

**Compound Chromatograms**

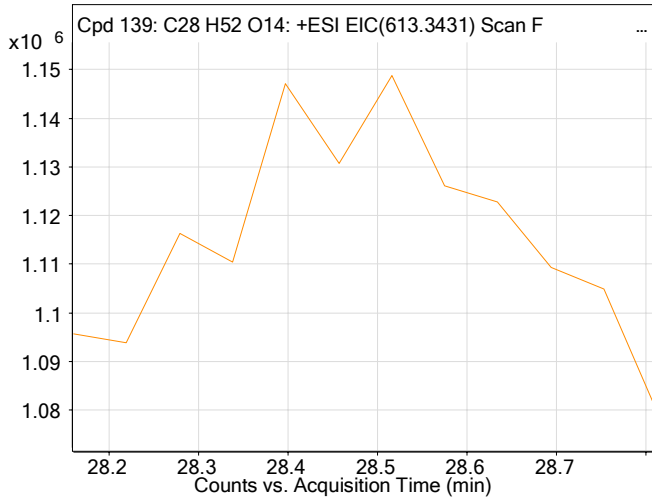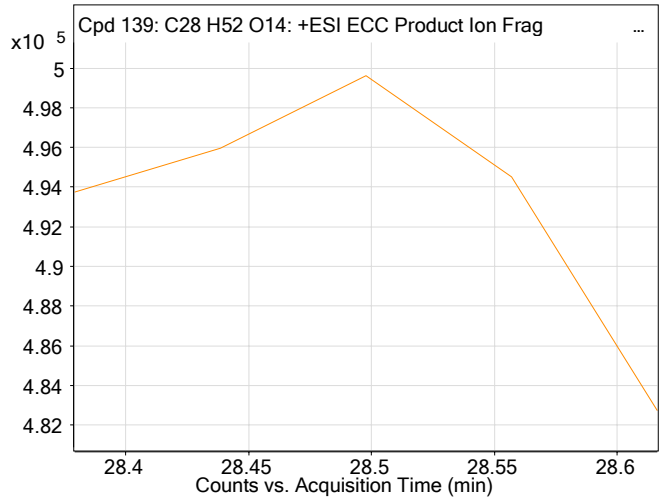

**MS Spectrum**

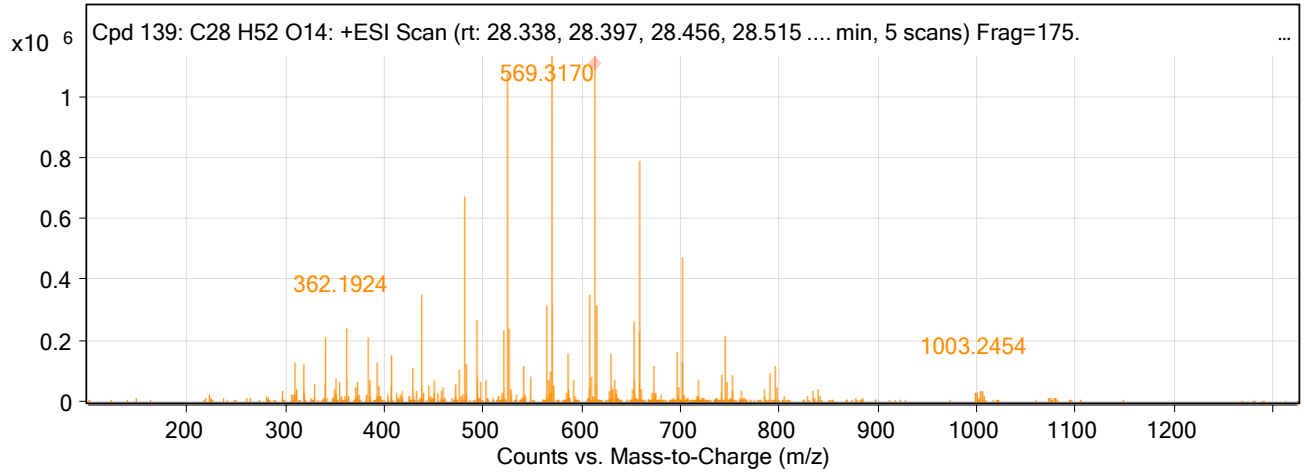

**MS Zoomed Spectrum**

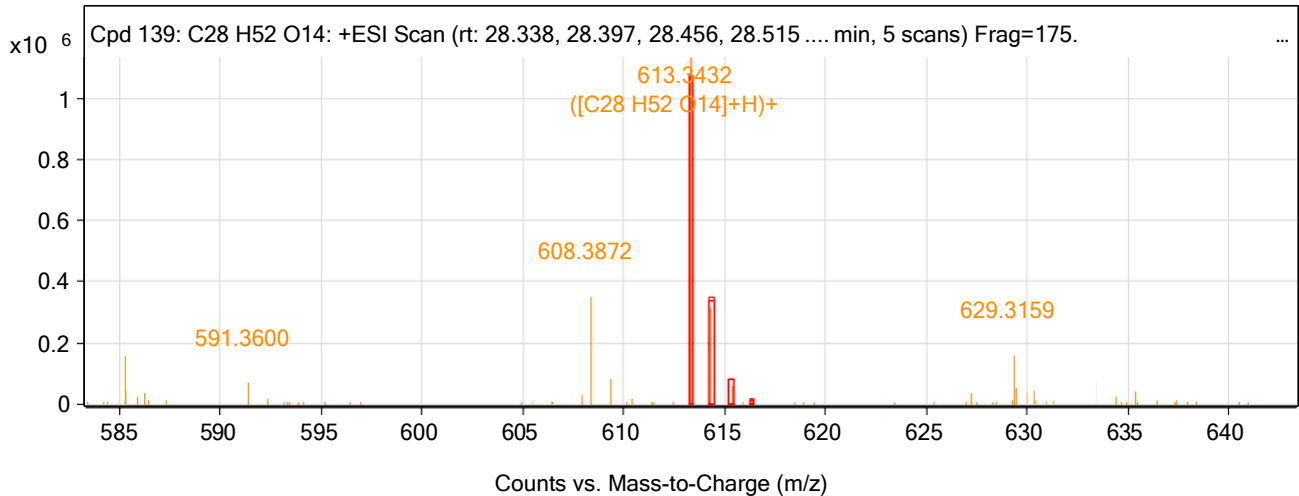

**MS Spectrum Peak List**

| m/z      | Calc m/z | Diff(ppm) | z | Abund      | Formula                                         | Ion                |
|----------|----------|-----------|---|------------|-------------------------------------------------|--------------------|
| 437.2371 |          |           | 1 | 351094.56  |                                                 |                    |
| 481.2635 |          |           | 1 | 672225.38  |                                                 |                    |
| 525.2904 |          |           | 1 | 1074061.88 |                                                 |                    |
| 569.317  |          |           | 1 | 1294616.38 |                                                 |                    |
| 613.3432 | 613.343  | -0.32     | 1 | 1132630.5  | C <sub>28</sub> H <sub>52</sub> O <sub>14</sub> | (M+H) <sup>+</sup> |
| 614.3459 | 614.3464 | 0.9       | 1 | 312969.75  | C <sub>28</sub> H <sub>52</sub> O <sub>14</sub> | (M+H) <sup>+</sup> |
| 615.3477 | 615.3489 | 1.85      | 1 | 56123.29   | C <sub>28</sub> H <sub>52</sub> O <sub>14</sub> | (M+H) <sup>+</sup> |
| 616.3505 | 616.3515 | 1.66      | 1 | 7330.14    | C <sub>28</sub> H <sub>52</sub> O <sub>14</sub> | (M+H) <sup>+</sup> |
| 657.3693 |          |           | 1 | 787210.19  |                                                 |                    |
| 701.3953 |          |           | 1 | 474025.66  |                                                 |                    |

MSMS Spectrum

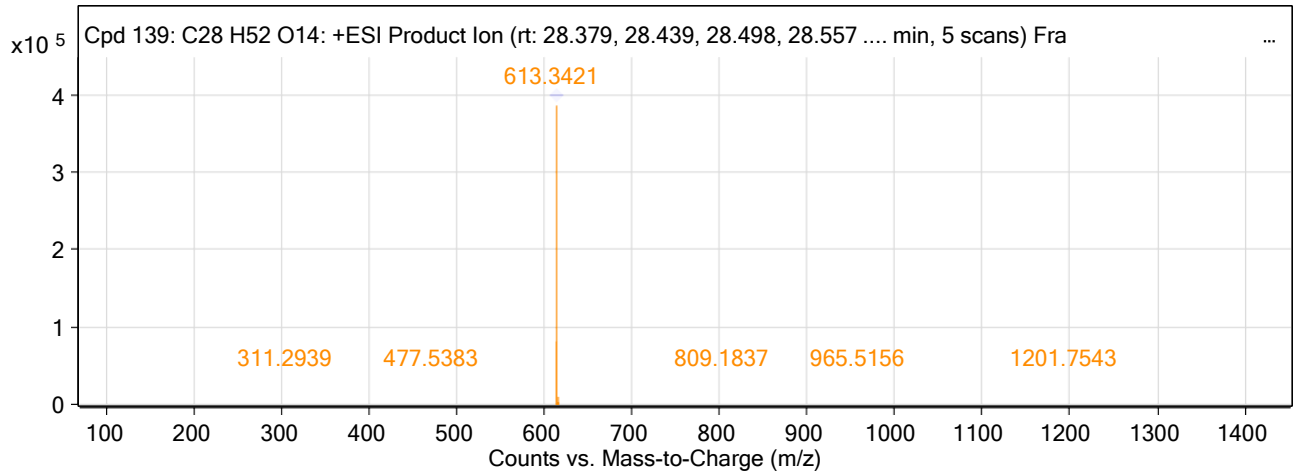

**MS/MS Spectrum Peak List**

| m/z      | Calc m/z | Diff(ppm) | z | Abund     |
|----------|----------|-----------|---|-----------|
| 103.0755 | 103.0754 | -0.92     |   | 13.68     |
| 133.0849 | 133.0859 | 8         | 1 | 62.39     |
| 157.122  | 157.1223 | 2.03      |   | 18.53     |
| 188.1028 | 188.1043 | 8.03      |   | 13.39     |
| 265.2146 | 265.2162 | 5.97      |   | 13.8      |
| 287.182  | 287.1853 | 11.52     |   | 22.34     |
| 309.2773 | 309.2788 | 4.96      | 1 | 55.24     |
| 357.0661 | 357.0664 | 0.72      |   | 19.26     |
| 610.3194 | 610.3195 | 0.12      | 1 | 33.43     |
| 613.3421 | 613.343  | 1.44      | 1 | 385610.72 |

| Compound Label                                           | m/z      | RT     | Algorithm  | Mass     |
|----------------------------------------------------------|----------|--------|------------|----------|
| Cpd 140: C <sub>26</sub> H <sub>48</sub> O <sub>13</sub> | 569.3171 | 28.756 | Auto MS/MS | 568.3096 |

Compound Chromatograms

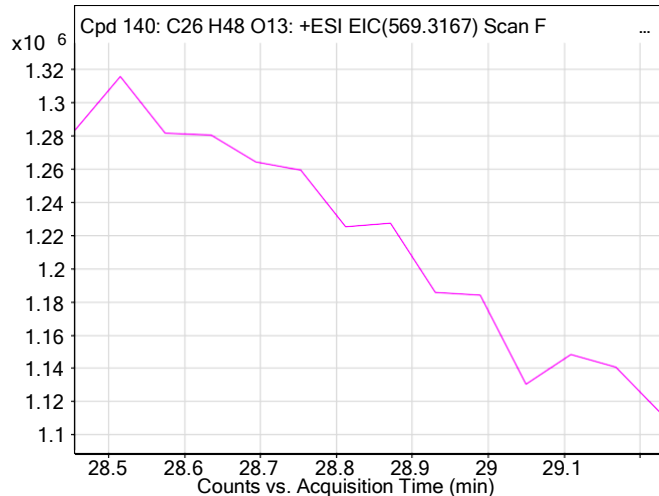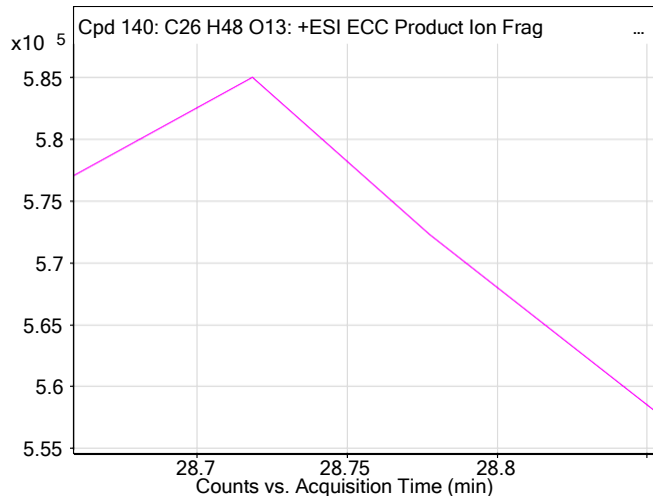

MS Spectrum

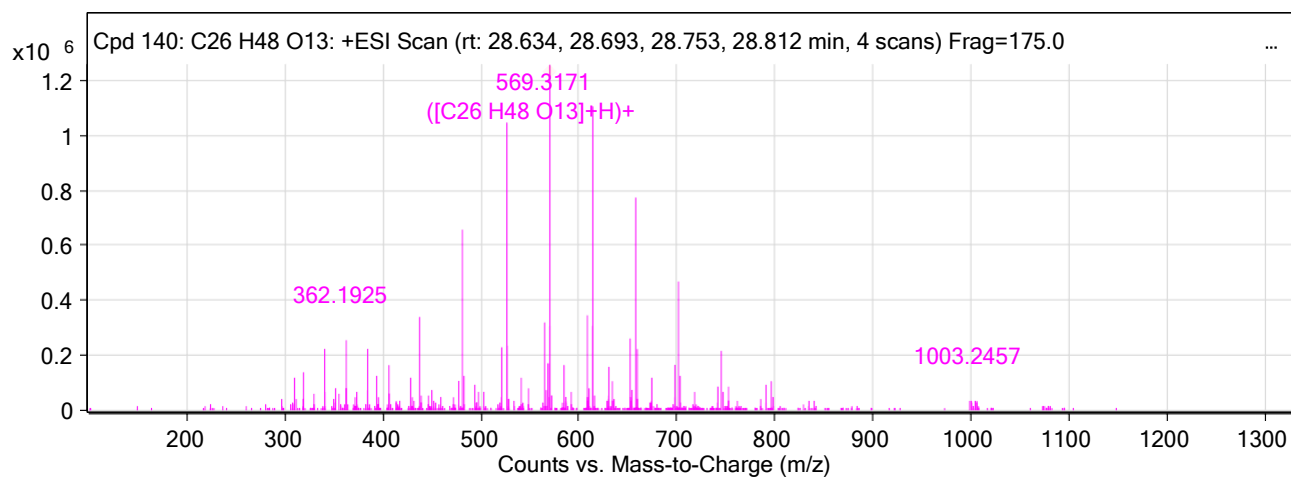

MS Zoomed Spectrum

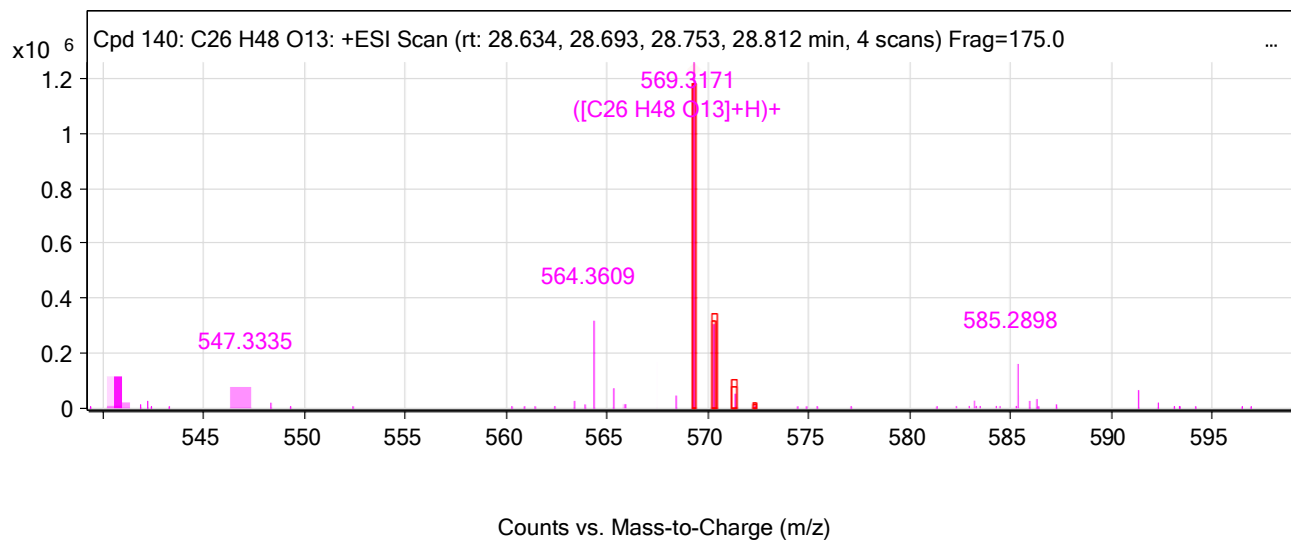

MS Spectrum Peak List

| m/z      | Calc m/z | Diff(ppm) | z | Abund      | Formula     | Ion    |
|----------|----------|-----------|---|------------|-------------|--------|
| 481.2637 |          |           | 1 | 657220.69  |             |        |
| 525.2906 |          |           | 1 | 1043848.75 |             |        |
| 569.3171 | 569.3168 | -0.64     | 1 | 1257624.5  | C26 H48 O13 | (M+H)+ |
| 570.3197 | 570.3202 | 0.95      | 1 | 302069.47  | C26 H48 O13 | (M+H)+ |
| 571.3217 | 571.3226 | 1.62      | 1 | 52255.59   | C26 H48 O13 | (M+H)+ |
| 572.3248 | 572.3253 | 0.93      | 1 | 6459.85    | C26 H48 O13 | (M+H)+ |
| 608.3874 |          |           | 1 | 345995.5   |             |        |
| 613.3433 |          |           | 1 | 1104274.5  |             |        |
| 657.3695 |          |           | 1 | 770959.5   |             |        |



MSMS Spectrum

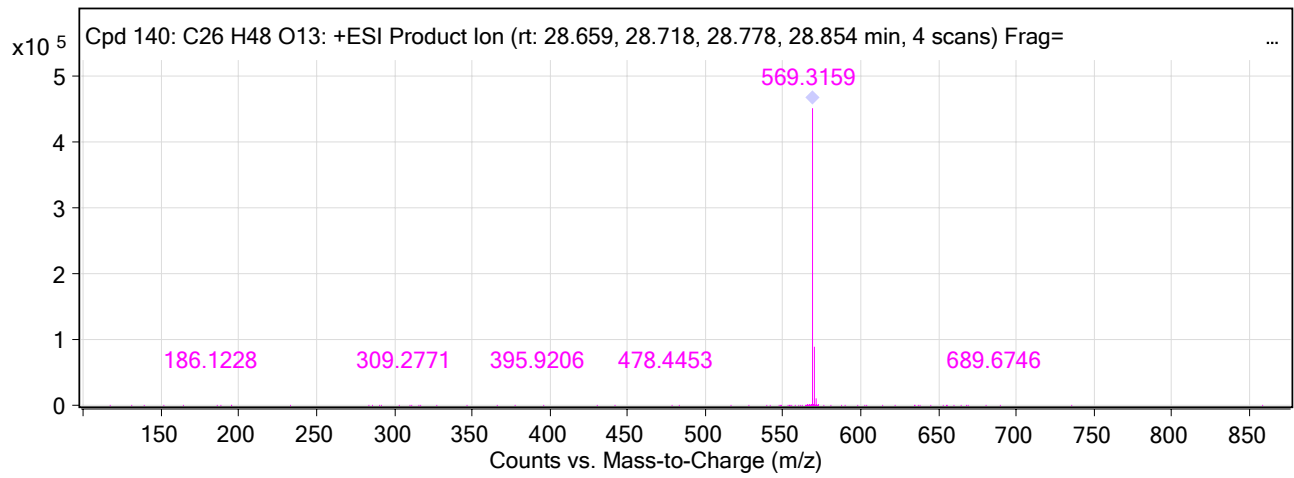

MS/MS Spectrum PeakList

| m/z      | Calc m/z | Diff(ppm) | z | Abund    |
|----------|----------|-----------|---|----------|
| 117.0916 | 117.091  | -4.98     |   | 33.72    |
| 131.0704 | 131.0703 | -1.3      |   | 16.25    |
| 139.1134 | 139.1117 | -11.7     |   | 15.11    |
| 186.1228 | 186.125  | 11.88     |   | 26.22    |
| 283.2634 | 283.2632 | -1.03     |   | 38.78    |
| 285.2013 | 285.206  | 16.44     |   | 18.01    |
| 309.2771 | 309.2788 | 5.36      |   | 54.71    |
| 311.2931 | 311.2945 | 4.5       |   | 14.8     |
| 346.2744 | 346.2714 | -8.61     |   | 17.04    |
| 569.3159 | 569.3168 | 1.5       | 1 | 451880.5 |

| Compound Label       | m/z      | RT     | Algorithm  | Mass     |
|----------------------|----------|--------|------------|----------|
| Cpd 141: C28 H52 O14 | 613.3433 | 28.786 | Auto MS/MS | 612.3358 |

Compound Chromatograms

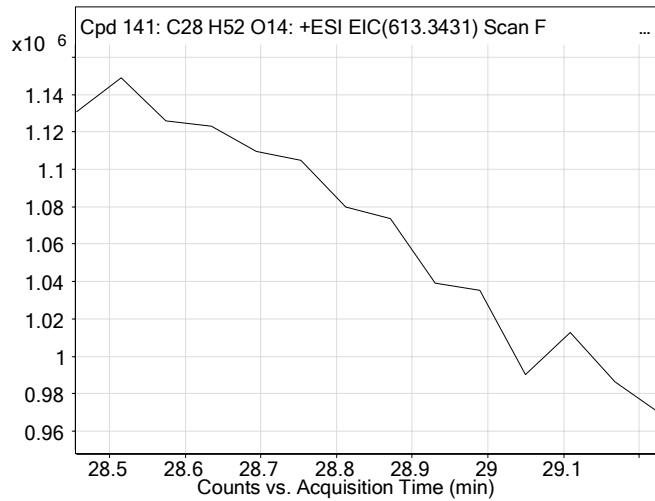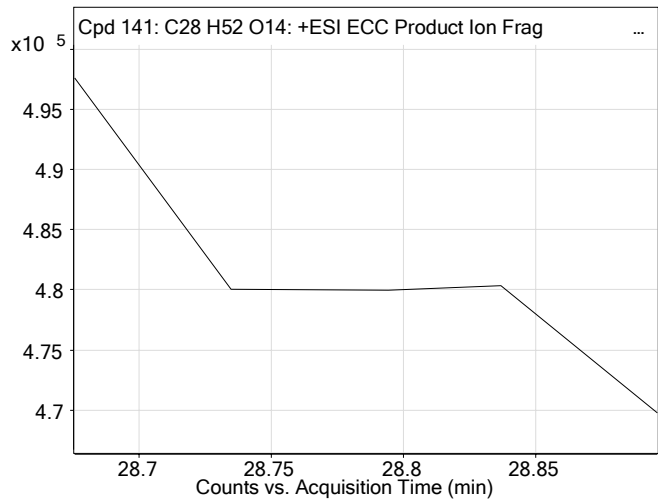

MS Spectrum

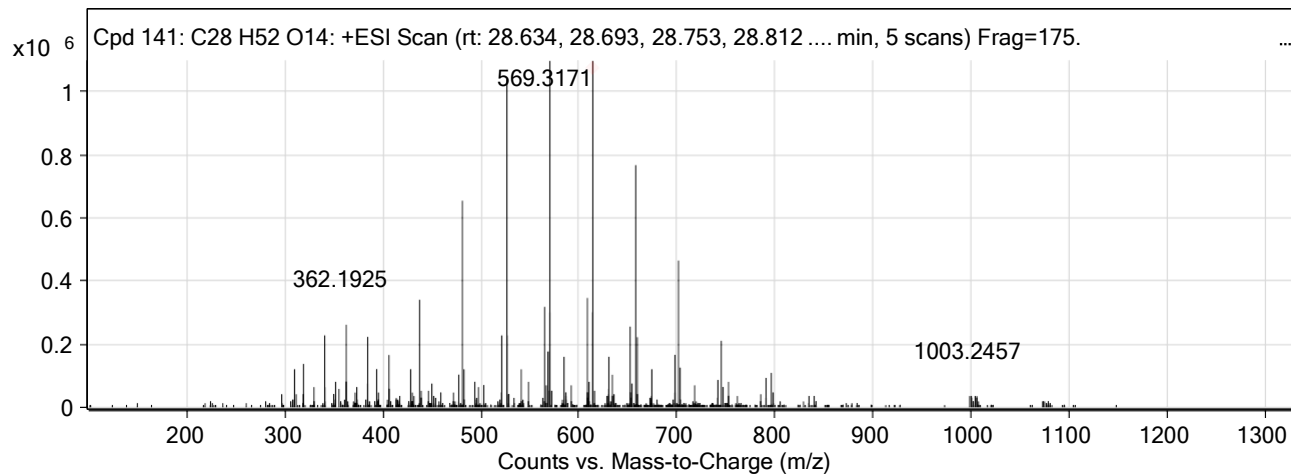

MS Zoomed Spectrum

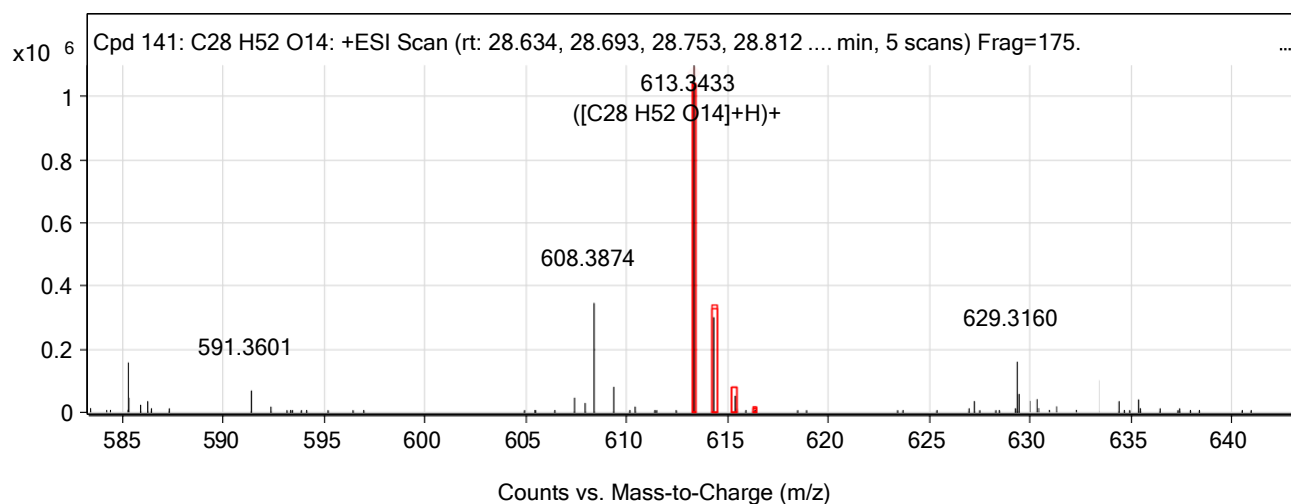

MS Spectrum Peak List

| m/z      | Calc m/z | Diff(ppm) | z | Abund      | Formula     | Ion    |
|----------|----------|-----------|---|------------|-------------|--------|
| 481.2637 |          |           | 1 | 652866.69  |             |        |
| 525.2906 |          |           | 1 | 1038022.69 |             |        |
| 569.3171 |          |           | 1 | 1251585.13 |             |        |
| 608.3874 |          |           | 1 | 344043.16  |             |        |
| 613.3433 | 613.343  | -0.51     | 1 | 1098179.75 | C28 H52 O14 | (M+H)+ |
| 614.3459 | 614.3464 | 0.77      | 1 | 302504.31  | C28 H52 O14 | (M+H)+ |
| 615.3479 | 615.3489 | 1.55      | 1 | 53740.61   | C28 H52 O14 | (M+H)+ |
| 616.3514 | 616.3515 | 0.28      | 1 | 7319.02    | C28 H52 O14 | (M+H)+ |
| 657.3695 |          |           | 1 | 766742.75  |             |        |
| 701.3955 |          |           | 1 | 462257.59  |             |        |

MSMS Spectrum

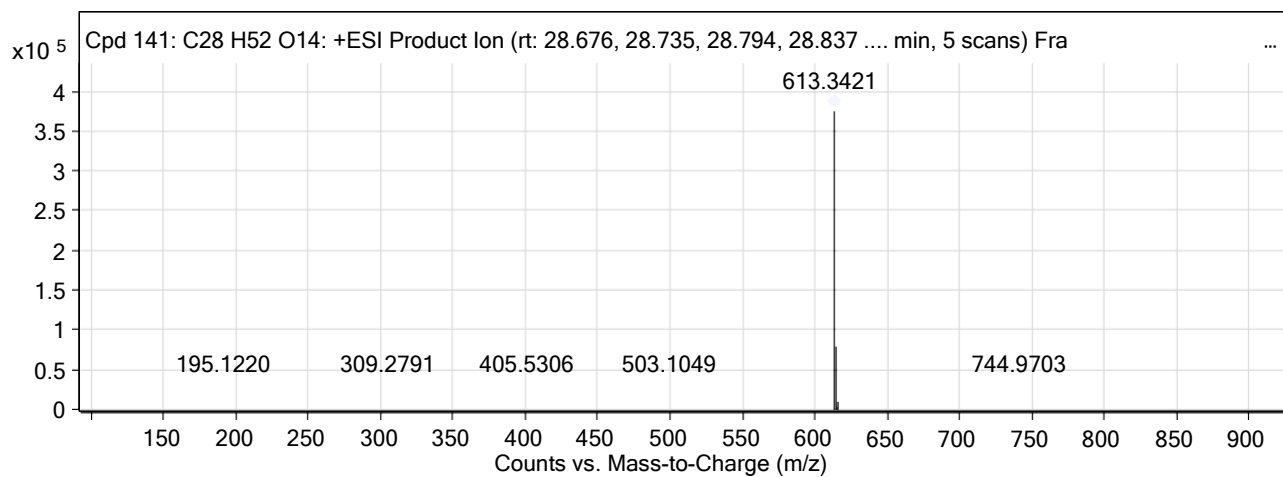

**MS/MS Spectrum Peak List**

| m/z      | Calc m/z | Diff(ppm) | z | Abund     |
|----------|----------|-----------|---|-----------|
| 133.0855 | 133.0859 | 3.52      |   | 13.35     |
| 177.1142 | 177.1121 | -11.63    |   | 20.72     |
| 283.2635 | 283.2632 | -1.33     | 1 | 26.6      |
| 296.1481 | 296.1466 | -5.1      |   | 18.13     |
| 309.2791 | 309.2788 | -1.04     | 1 | 61.36     |
| 357.0692 | 357.0664 | -7.82     |   | 28.05     |
| 490.3438 | 490.35   | 12.67     |   | 11.71     |
| 504.3227 | 504.3293 | 13.08     |   | 10.61     |
| 609.3124 | 304.6556 | -50001.06 | 2 | 67.23     |
| 613.3421 | 613.343  | 1.4       | 1 | 374706.16 |

| Compound Label       | m/z     | RT     | Algorithm  | Mass     |
|----------------------|---------|--------|------------|----------|
| Cpd 142: C26 H48 O13 | 569.317 | 28.972 | Auto MS/MS | 568.3095 |

**Compound Chromatograms**

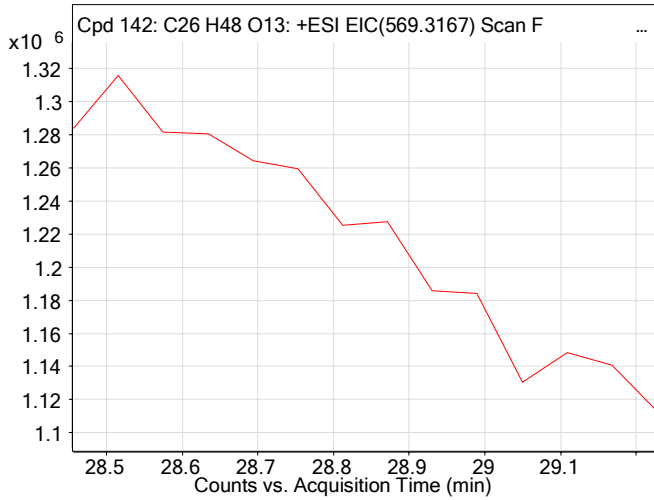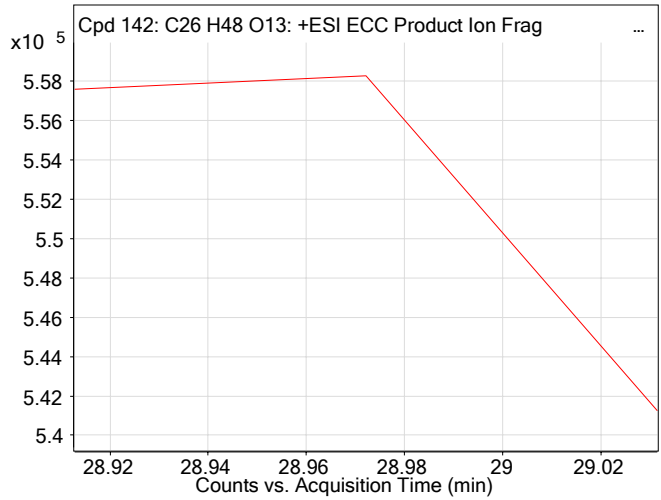

**MS Spectrum**

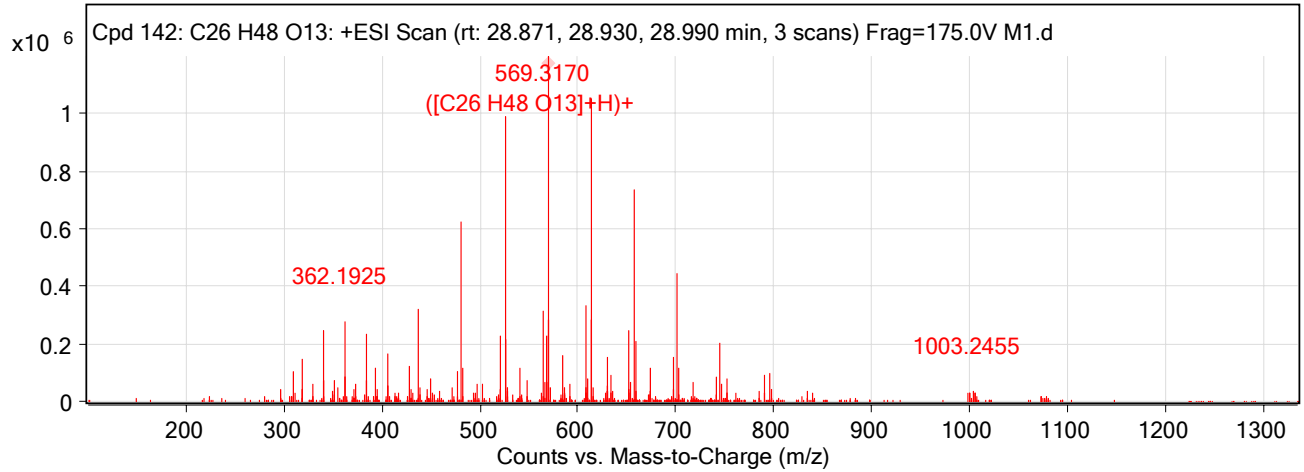

**MS Zoomed Spectrum**

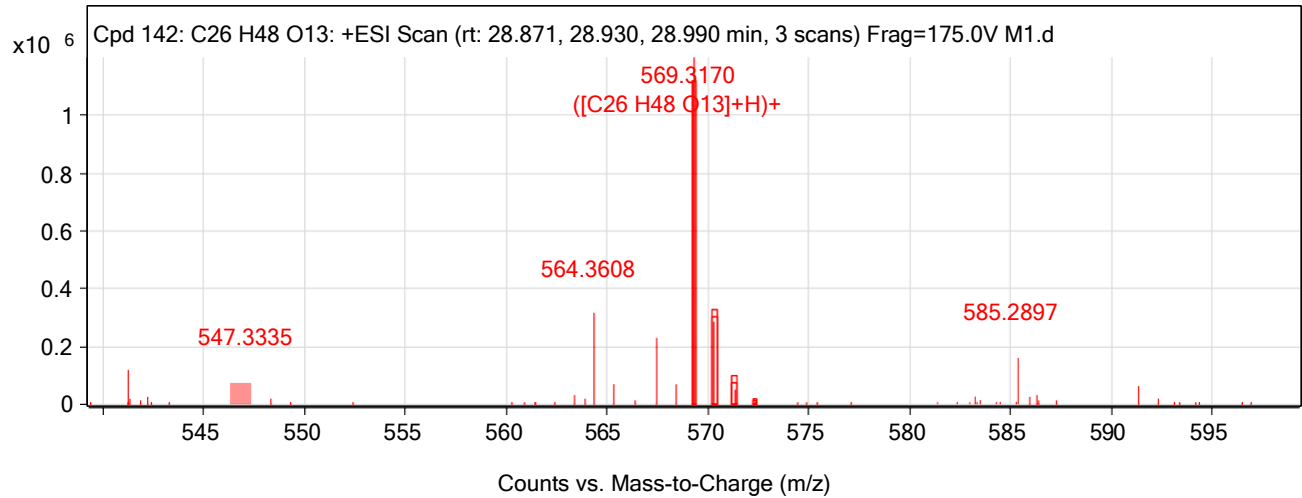

MS Spectrum Peak List

| m/z      | Calc m/z | Diff(ppm) | z | Abund      | Formula                                         | Ion    |
|----------|----------|-----------|---|------------|-------------------------------------------------|--------|
| 481.2636 |          |           | 1 | 624163.81  |                                                 |        |
| 525.2905 |          |           | 1 | 988199.5   |                                                 |        |
| 569.317  | 569.3168 | -0.43     | 1 | 1199141.13 | C <sub>26</sub> H <sub>48</sub> O <sub>13</sub> | (M+H)+ |
| 570.3195 | 570.3202 | 1.2       | 1 | 283641.09  | C <sub>26</sub> H <sub>48</sub> O <sub>13</sub> | (M+H)+ |
| 571.3215 | 571.3226 | 1.9       | 1 | 48125.69   | C <sub>26</sub> H <sub>48</sub> O <sub>13</sub> | (M+H)+ |
| 572.3243 | 572.3253 | 1.65      | 1 | 6077.48    | C <sub>26</sub> H <sub>48</sub> O <sub>13</sub> | (M+H)+ |
| 608.3873 |          |           | 1 | 333581     |                                                 |        |
| 613.3433 |          |           | 1 | 104947.5   |                                                 |        |
| 657.3694 |          |           | 1 | 734032.44  |                                                 |        |
| 701.3954 |          |           | 1 | 443529.34  |                                                 |        |

MSMS Spectrum

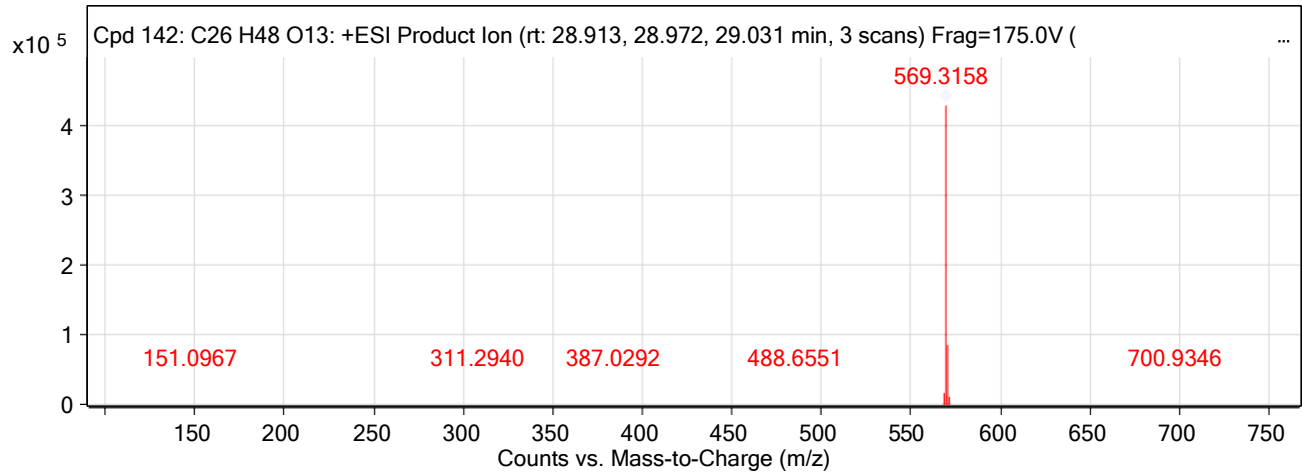

MS/MS Spectrum Peak List

| m/z      | Calc m/z | Diff(ppm)  | z | Abund     |
|----------|----------|------------|---|-----------|
| 133.0864 | 133.0859 | -3.54      |   | 22.31     |
| 166.1299 | 166.1352 | 31.76      |   | 18.4      |
| 283.2646 | 283.2632 | -5.13      |   | 20.51     |
| 309.2836 | 309.2788 | -15.66     |   | 19.56     |
| 311.294  | 311.2945 | 1.33       |   | 44.58     |
| 318.2392 | 318.2401 | 2.69       |   | 20.52     |
| 453.3206 | 453.3211 | 1.1        |   | 21.09     |
| 538.2932 | 538.2984 | 9.66       |   | 30.17     |
| 566.3007 | 283.1464 | -500006.99 | 2 | 17.51     |
| 569.3158 | 569.3168 | 1.62       | 1 | 429930.16 |

| Compound Label                                           | m/z      | RT     | Algorithm  | Mass     |
|----------------------------------------------------------|----------|--------|------------|----------|
| Cpd 143: C <sub>28</sub> H <sub>52</sub> O <sub>14</sub> | 613.3431 | 29.074 | Auto MS/MS | 612.3356 |

Compound Chromatograms

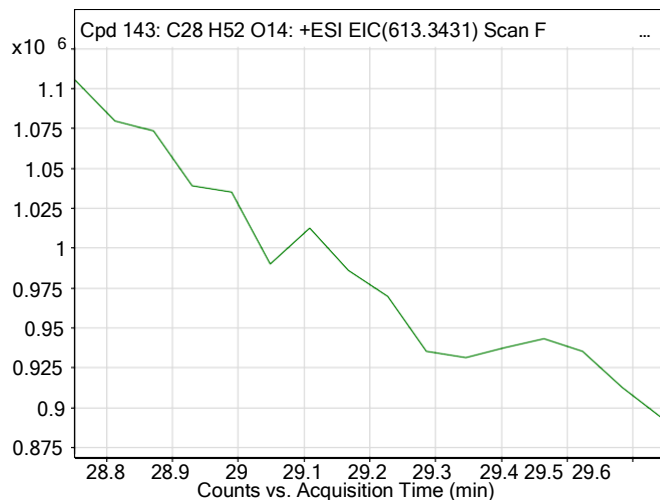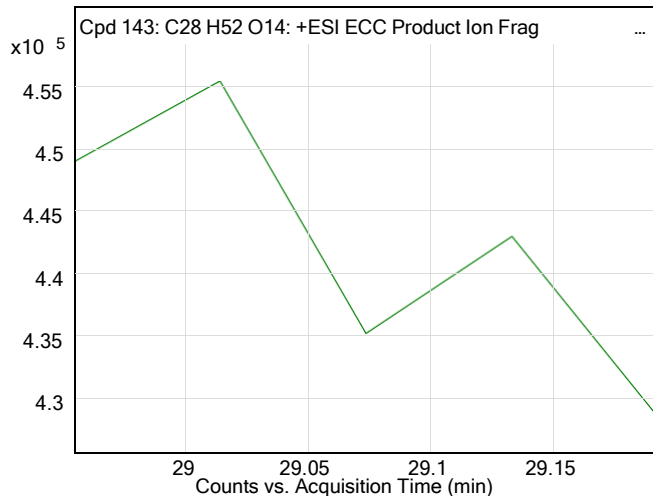

MS Spectrum

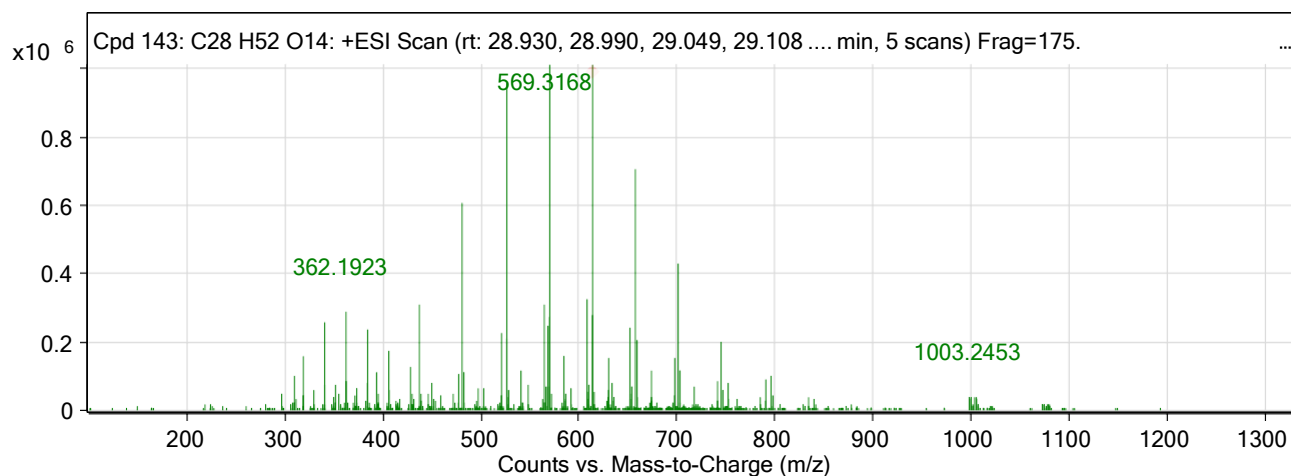

MS Zoomed Spectrum

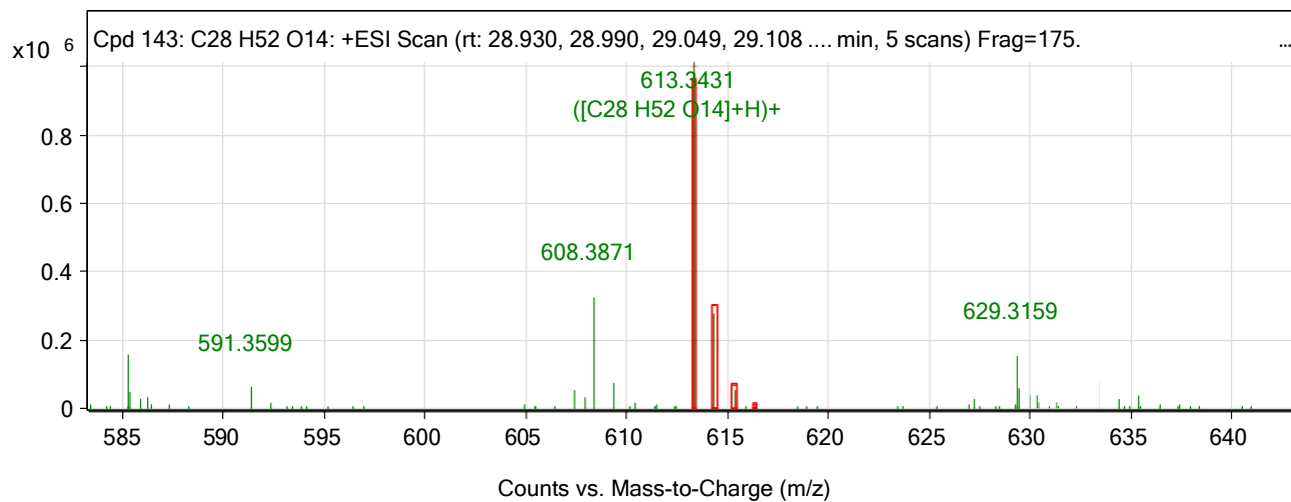

MS Spectrum Peak List

| m/z      | Calc m/z | Diff(ppm) | z | Abund     | Formula | Ion |
|----------|----------|-----------|---|-----------|---------|-----|
| 481.2635 |          |           | 1 | 604136.13 |         |     |
| 525.2904 |          |           | 1 | 954885    |         |     |
| 569.3168 |          |           | 1 | 1157939   |         |     |
| 608.3871 |          |           | 1 | 324997.31 |         |     |

|          |          |       |   |            |             |        |
|----------|----------|-------|---|------------|-------------|--------|
| 613.3431 | 613.343  | -0.16 | 1 | 1012804.38 | C28 H52 O14 | (M+H)+ |
| 614.3457 | 614.3464 | 1.21  | 1 | 276633.28  | C28 H52 O14 | (M+H)+ |
| 615.3476 | 615.3489 | 2.03  | 1 | 50003.73   | C28 H52 O14 | (M+H)+ |
| 616.3508 | 616.3515 | 1.24  | 1 | 6599.56    | C28 H52 O14 | (M+H)+ |
| 657.3692 |          |       | 1 | 703213.44  |             |        |

MSMS Spectrum

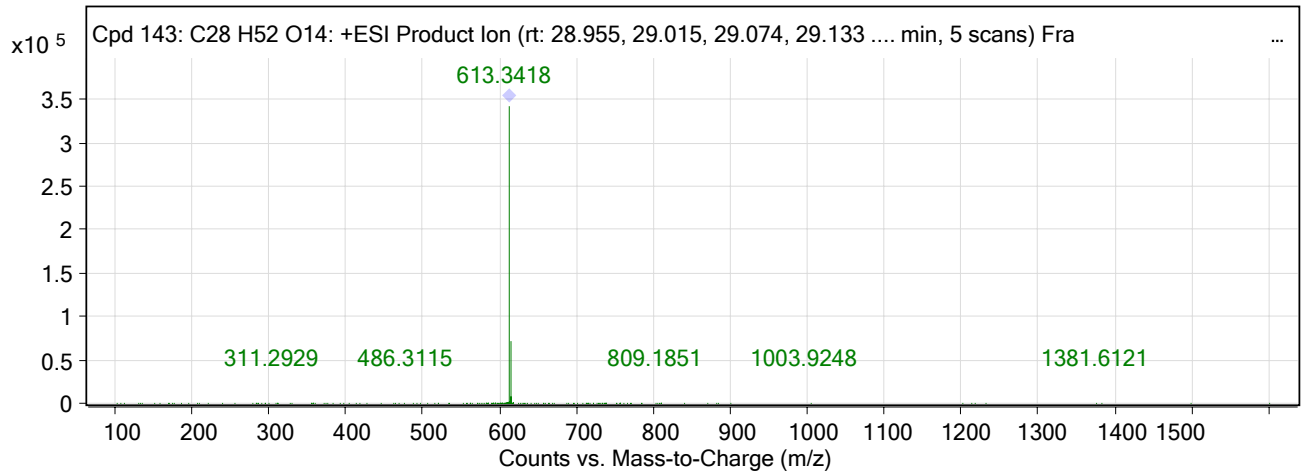

MS/MS Spectrum Peak List

| m/z      | Calc m/z | Diff(ppm) | z | Abund     |
|----------|----------|-----------|---|-----------|
| 103.0753 | 103.0754 | 0.19      |   | 15.42     |
| 177.1122 | 177.1121 | -0.17     |   | 34.67     |
| 296.148  | 296.1466 | -4.76     |   | 22.38     |
| 309.2774 | 309.2788 | 4.54      |   | 19.14     |
| 311.2929 | 311.2945 | 4.93      | 1 | 79.52     |
| 373.0995 | 373.0977 | -4.98     |   | 21.58     |
| 486.3115 | 486.3187 | 14.81     |   | 20.23     |
| 514.2904 | 514.2984 | 15.58     |   | 15.65     |
| 610.3161 | 610.3195 | 5.62      | 1 | 54.41     |
| 613.3418 | 613.343  | 1.87      | 1 | 342543.19 |

| Compound Label          | m/z      | RT    | Algorithm  | Mass     |
|-------------------------|----------|-------|------------|----------|
| Cpd 144: C22 H42 N3 O11 | 525.2901 | 29.18 | Auto MS/MS | 524.2828 |

Compound Chromatograms

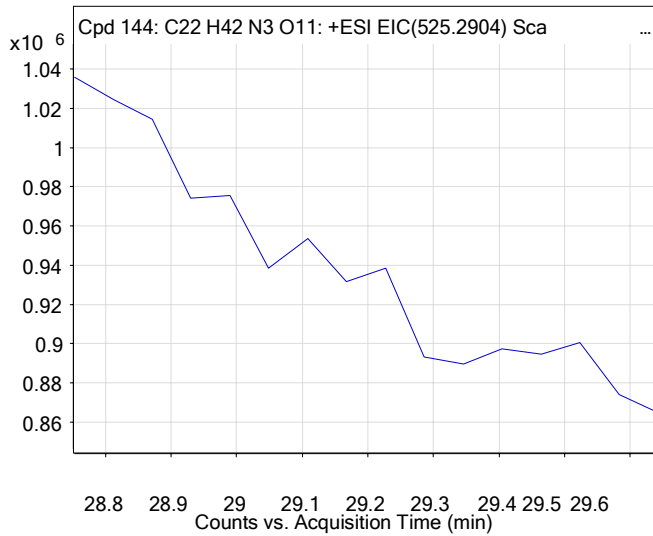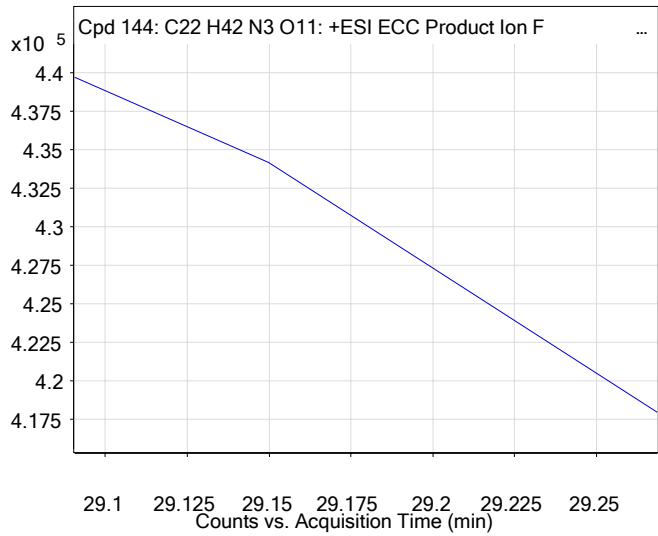

MS Spectrum

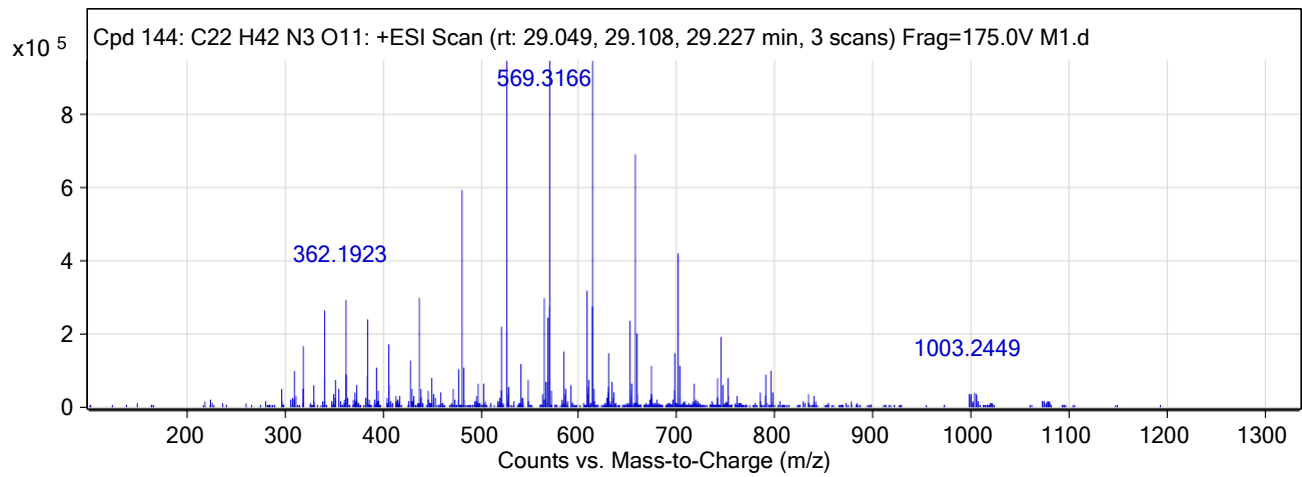

MS Zoomed Spectrum

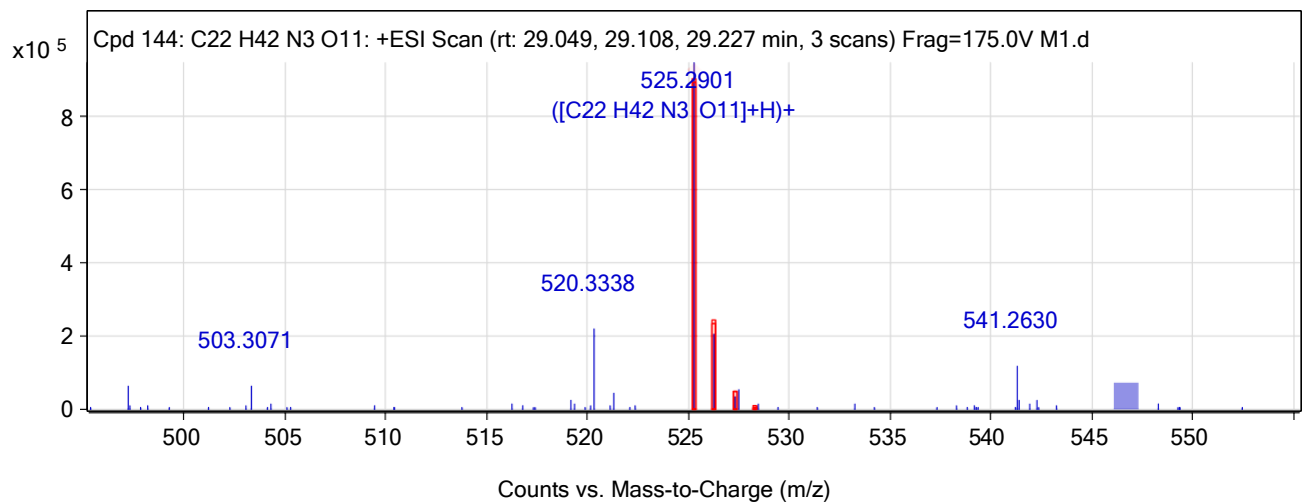

MS Spectrum Peak List

| m/z      | Calc m/z | Diff(ppm) | z | Abund      | Formula        | Ion    |
|----------|----------|-----------|---|------------|----------------|--------|
| 481.2633 |          |           | 1 | 589497.81  |                |        |
| 525.2901 | 525.2892 | -1.78     | 1 | 943682     | C22 H42 N3 O11 | (M+H)+ |
| 526.2928 | 526.2924 | -0.82     | 1 | 204165.88  | C22 H42 N3 O11 | (M+H)+ |
| 527.2953 | 527.2947 | -1.11     | 1 | 33600.35   | C22 H42 N3 O11 | (M+H)+ |
| 528.2983 | 528.2972 | -2.01     | 1 | 4508.36    | C22 H42 N3 O11 | (M+H)+ |
| 569.3166 |          |           | 1 | 1130770.38 |                |        |
| 608.3869 |          |           | 1 | 314310.03  |                |        |
| 613.3428 |          |           | 1 | 990941     |                |        |
| 657.3689 |          |           | 1 | 684617.75  |                |        |
| 701.3949 |          |           | 1 | 419705.13  |                |        |

MSMS Spectrum

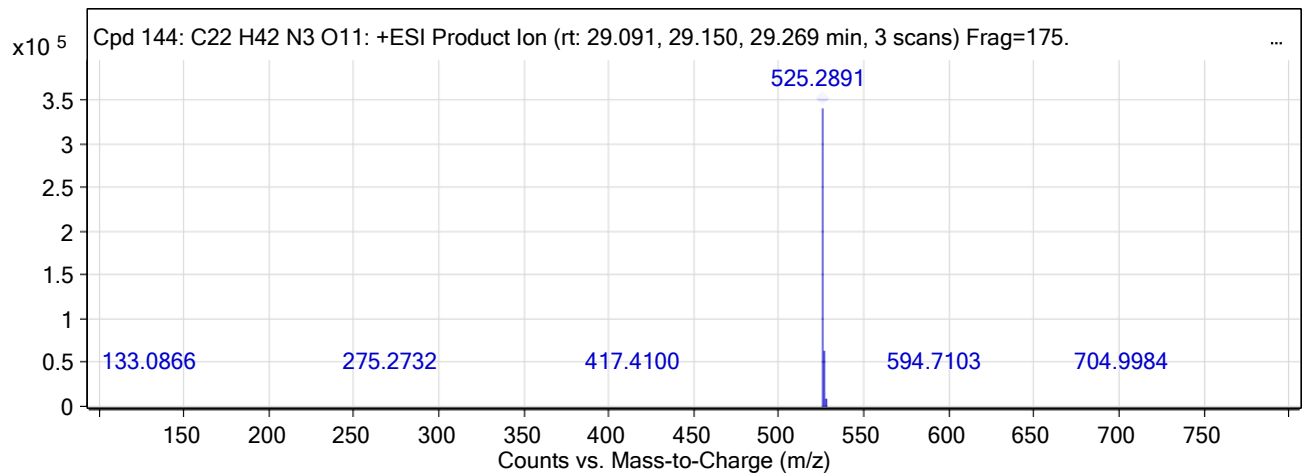



**MS/MS Spectrum Peak List**

| m/z      | Calc m/z | Diff(ppm)  | z | Abund     |
|----------|----------|------------|---|-----------|
| 133.0866 | 133.0859 | -4.85      |   | 56.8      |
| 141.1282 | 141.1274 | -5.93      |   | 18.34     |
| 177.1131 | 177.1121 | -5.69      |   | 31.32     |
| 239.1455 | 239.1476 | 8.81       |   | 18.06     |
| 275.2732 | 275.2733 | 0.37       |   | 19.38     |
| 283.2633 | 283.2632 | -0.4       |   | 17.8      |
| 311.2924 | 311.2931 | 2.4        |   | 17.9      |
| 322.2092 | 322.2098 | 1.84       |   | 18.43     |
| 495.2624 | 247.6334 | -499995.52 | 2 | 18.34     |
| 525.2891 | 525.2892 | 0.22       | 1 | 341041.31 |

| Compound Label       | m/z      | RT     | Algorithm  | Mass     |
|----------------------|----------|--------|------------|----------|
| Cpd 145: C26 H48 O13 | 569.3168 | 29.319 | Auto MS/MS | 568.3094 |

**Compound Chromatograms**

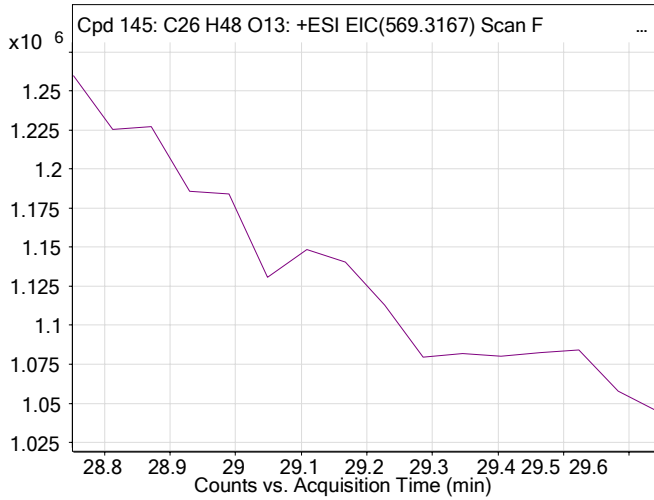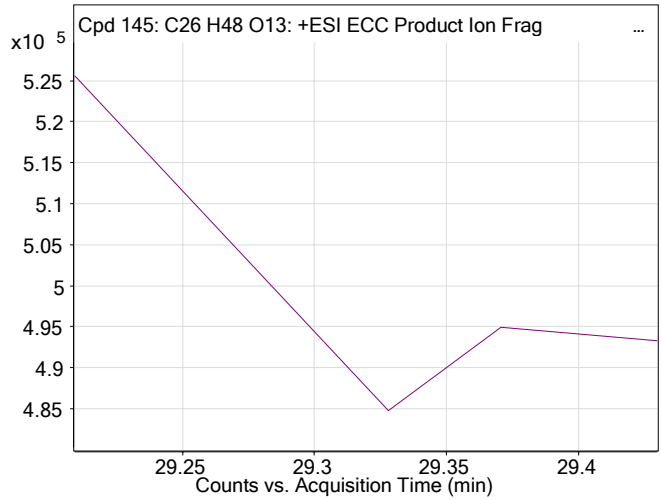

**MS Spectrum**

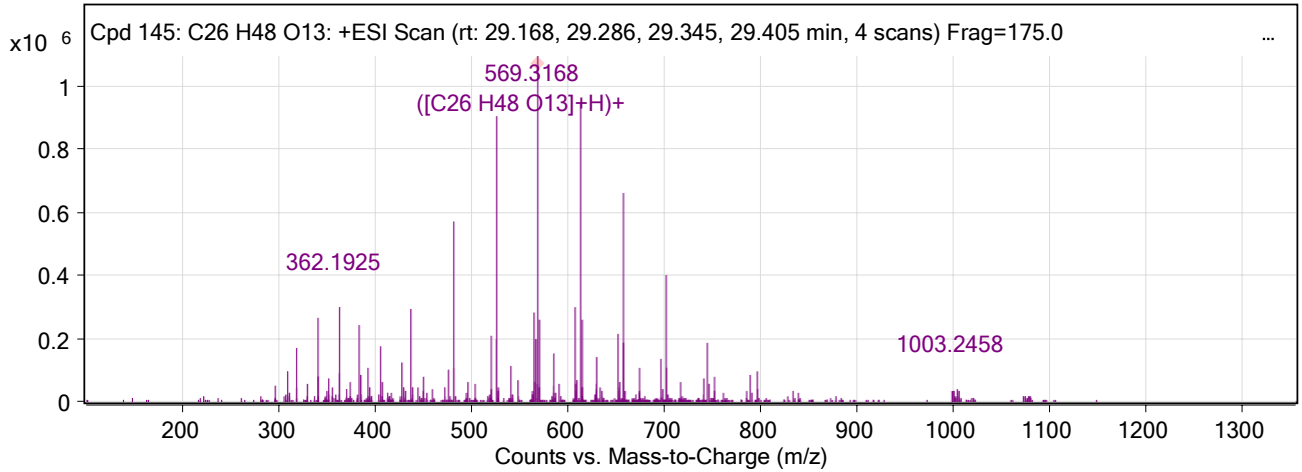

**MS Zoomed Spectrum**

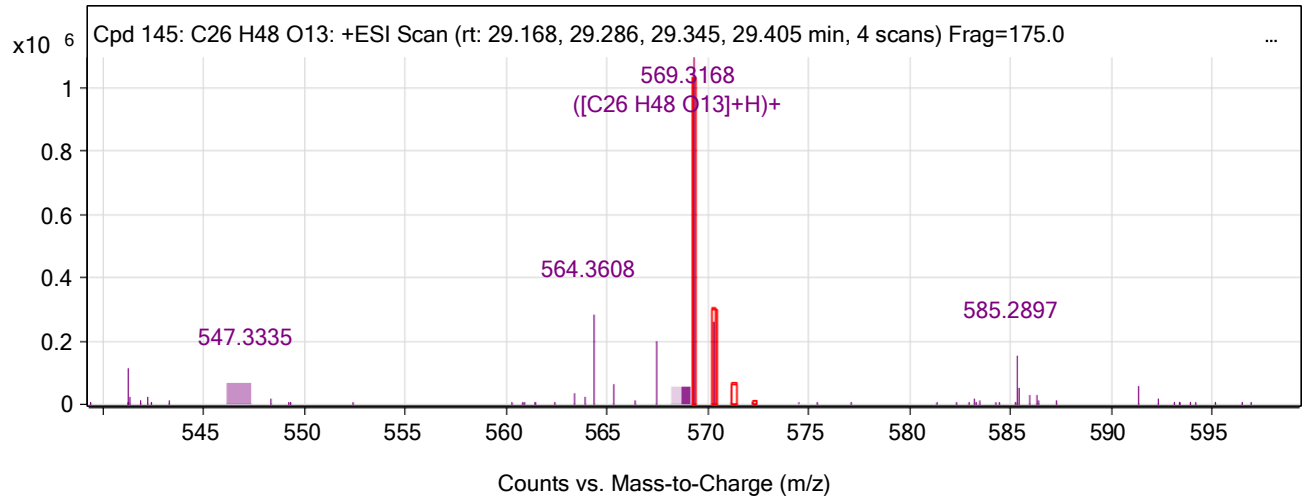

**MS Spectrum Peak List**

| m/z      | Calc m/z | Diff(ppm) | z | Abund     | Formula                                         | Ion    |
|----------|----------|-----------|---|-----------|-------------------------------------------------|--------|
| 362.1925 |          |           | 2 | 299917.5  |                                                 |        |
| 481.2636 |          |           | 1 | 570391.63 |                                                 |        |
| 525.2905 |          |           | 1 | 903126.25 |                                                 |        |
| 569.3168 | 569.3168 | -0.09     | 1 | 1095542   | C <sub>26</sub> H <sub>48</sub> O <sub>13</sub> | (M+H)+ |
| 570.3195 | 570.3202 | 1.27      | 1 | 261198.56 | C <sub>26</sub> H <sub>48</sub> O <sub>13</sub> | (M+H)+ |
| 571.3214 | 571.3226 | 2.04      | 1 | 44018.05  | C <sub>26</sub> H <sub>48</sub> O <sub>13</sub> | (M+H)+ |
| 572.3244 | 572.3253 | 1.6       | 1 | 5649.51   | C <sub>26</sub> H <sub>48</sub> O <sub>13</sub> | (M+H)+ |
| 613.3432 |          |           | 1 | 947812.88 |                                                 |        |
| 657.3694 |          |           | 1 | 660733.25 |                                                 |        |
| 701.3954 |          |           | 1 | 404065.31 |                                                 |        |

MSMS Spectrum

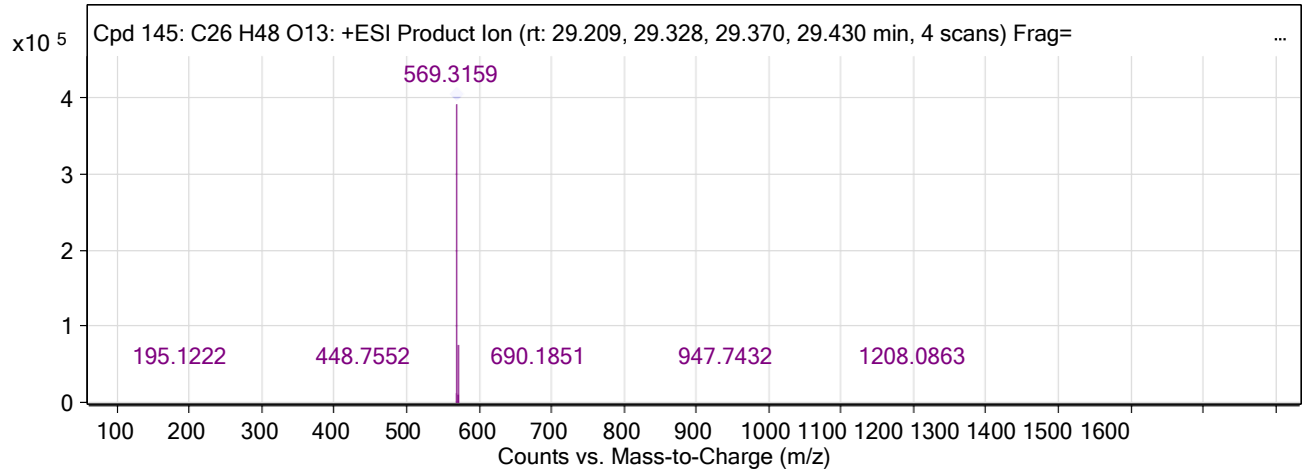

**MS/MS Spectrum Peak List**

| m/z      | Calc m/z | Diff(ppm) | z | Abund     |
|----------|----------|-----------|---|-----------|
| 233.1748 | 233.1747 | -0.32     |   | 24.98     |
| 274.2138 | 274.2139 | 0.32      |   | 18.04     |
| 285.2067 | 285.206  | -2.42     |   | 17.75     |
| 309.2786 | 309.2788 | 0.68      |   | 14.78     |
| 311.2924 | 311.2945 | 6.64      | 1 | 43.23     |
| 384.2005 | 384.199  | -3.84     |   | 14.52     |
| 545.3238 | 545.3168 | -12.81    |   | 21.73     |
| 566.301  | 566.2933 | -13.53    |   | 44.44     |
| 569.3159 | 569.3168 | 1.54      | 1 | 391177.19 |
| 570.3184 |          |           | 1 | 76110.75  |

| Compound Label                                           | m/z      | RT     | Algorithm  | Mass     |
|----------------------------------------------------------|----------|--------|------------|----------|
| Cpd 146: C <sub>28</sub> H <sub>52</sub> O <sub>14</sub> | 613.3432 | 29.349 | Auto MS/MS | 612.3357 |

Compound Chromatograms

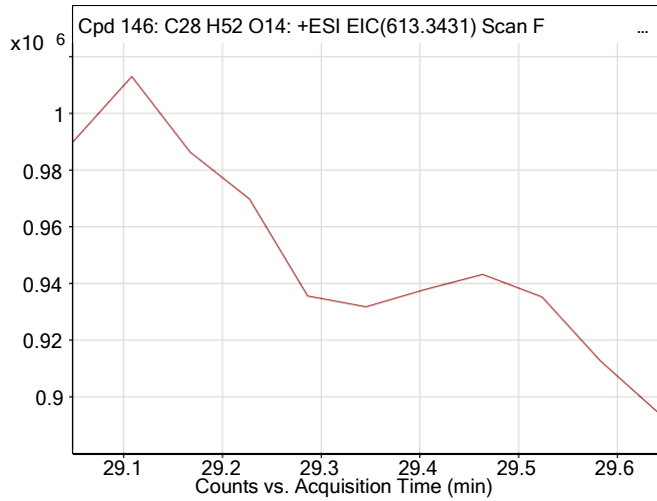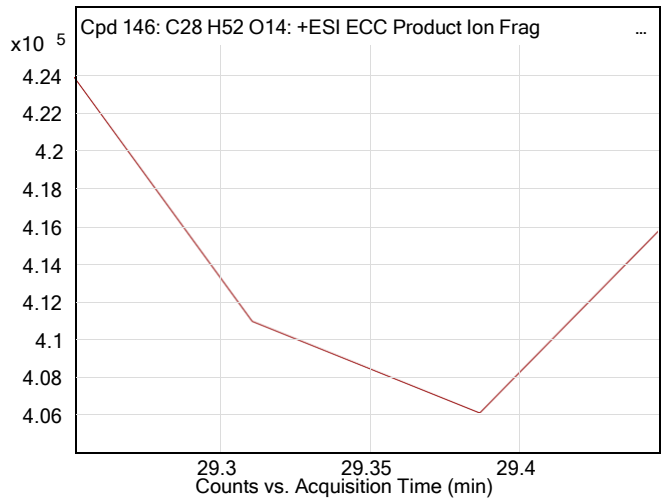

MS Spectrum

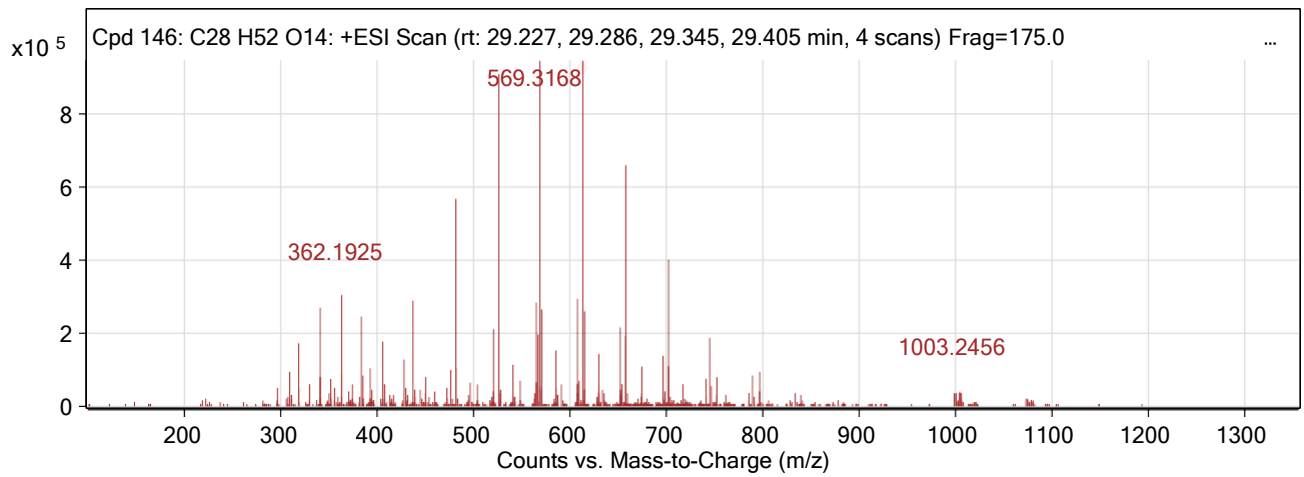

MS Zoomed Spectrum

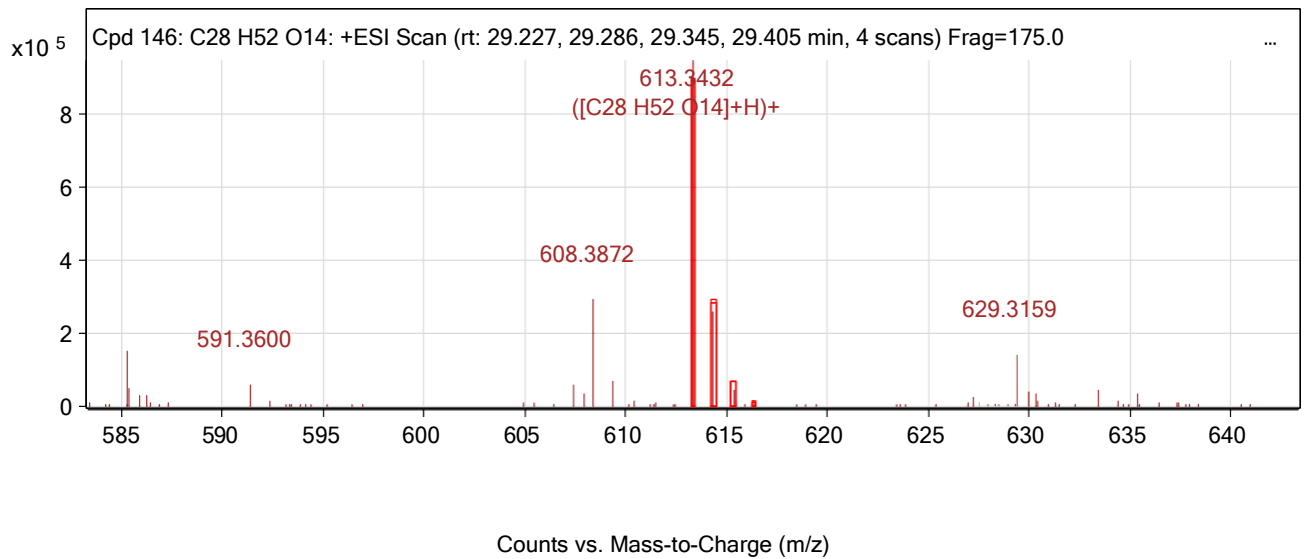

Counts vs. Mass-to-Charge (m/z)

MS Spectrum Peak List

| <i>m/z</i> | Calc <i>m/z</i> | Diff(ppm) | <i>z</i> | Abund      | Formula     | Ion    |
|------------|-----------------|-----------|----------|------------|-------------|--------|
| 362.1925   |                 |           | 2        | 300034.16  |             |        |
| 481.2635   |                 |           | 1        | 566605.13  |             |        |
| 525.2904   |                 |           | 1        | 904751.5   |             |        |
| 569.3168   |                 |           | 1        | 1088695.13 |             |        |
| 613.3432   | 613.343         | -0.29     | 1        | 943671     | C28 H52 O14 | (M+H)+ |
| 614.3458   | 614.3464        | 1.05      | 1        | 259902.72  | C28 H52 O14 | (M+H)+ |
| 615.3477   | 615.3489        | 1.91      | 1        | 46230.77   | C28 H52 O14 | (M+H)+ |
| 616.351    | 616.3515        | 0.95      | 1        | 6281.71    | C28 H52 O14 | (M+H)+ |
| 657.3693   |                 |           | 1        | 658235.13  |             |        |

MSMS Spectrum

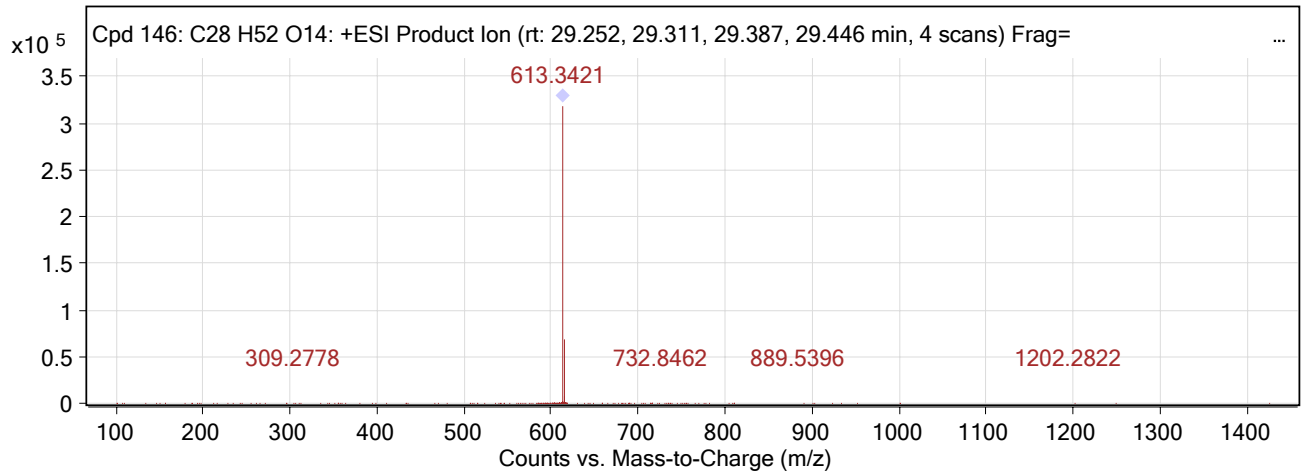

MS/MS Spectrum PeakList

| m/z      | Calc m/z | Diff(ppm)  | z | Abund     |
|----------|----------|------------|---|-----------|
| 133.0854 | 133.0859 | 3.58       |   | 27.13     |
| 309.2778 | 309.2788 | 3.2        |   | 79.54     |
| 311.2915 | 311.2945 | 9.43       |   | 51.03     |
| 357.0636 | 357.0664 | 7.67       | 1 | 33.61     |
| 363.2317 | 363.2377 | 16.57      |   | 18.33     |
| 393.2444 | 393.2483 | 9.98       |   | 18.74     |
| 610.3282 | 305.1595 | -500007.57 | 2 | 37.13     |
| 613.3421 | 613.343  | 1.5        | 1 | 318847.59 |
| 614.3447 |          |            | 1 | 67826.17  |
| 615.347  |          |            | 1 | 8172.08   |

| Compound Label          | m/z      | RT     | Algorithm  | Mass     |
|-------------------------|----------|--------|------------|----------|
| Cpd 147: C24 H46 N3 O12 | 569.3166 | 29.608 | Auto MS/MS | 568.3092 |

Compound Chromatograms

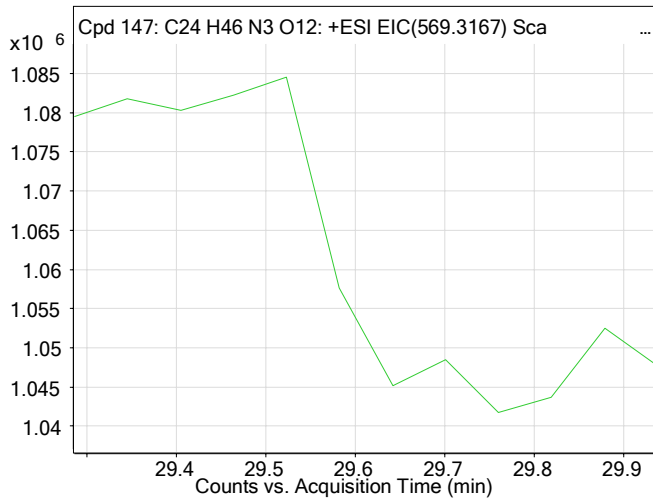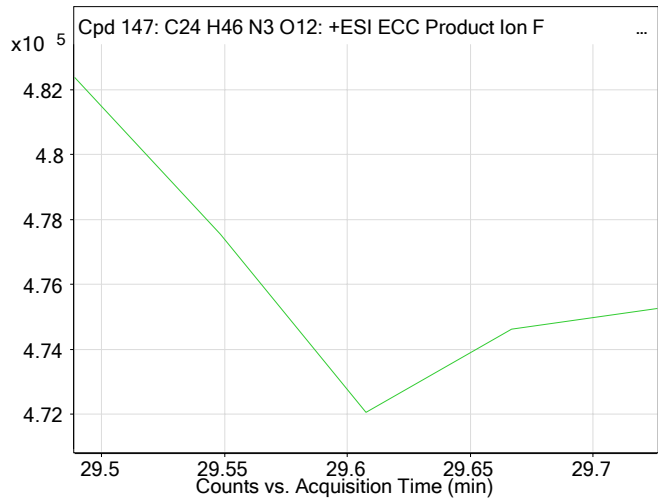

MS Spectrum

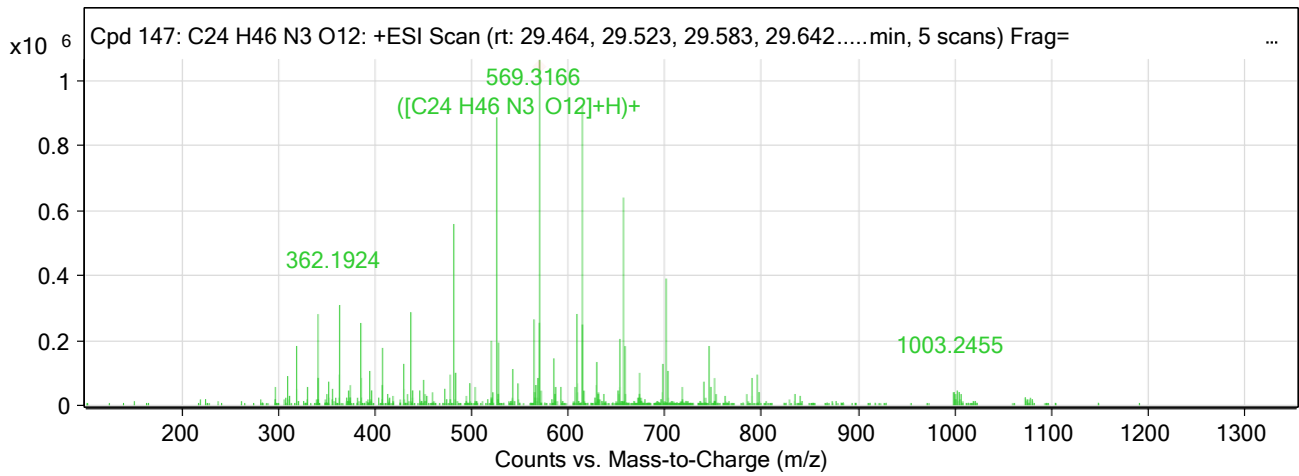

MS Zoomed Spectrum

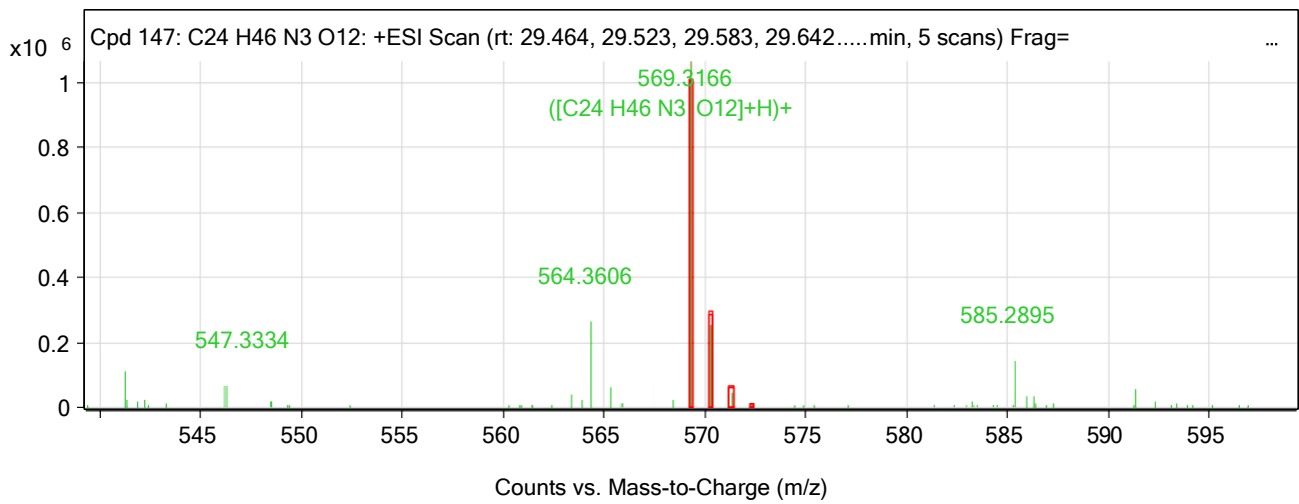

MS Spectrum Peak List

| m/z      | Calc m/z | Diff(ppm) | z | Abund      | Formula                                                        | Ion                |
|----------|----------|-----------|---|------------|----------------------------------------------------------------|--------------------|
| 362.1924 |          |           | 2 | 309336.31  |                                                                |                    |
| 481.2634 |          |           | 1 | 555476.44  |                                                                |                    |
| 525.2903 |          |           | 1 | 882303.63  |                                                                |                    |
| 569.3166 | 569.3154 | -2.07     | 1 | 1063629.13 | C <sub>24</sub> H <sub>46</sub> N <sub>3</sub> O <sub>12</sub> | (M+H) <sup>+</sup> |
| 570.3193 | 570.3186 | -1.25     | 1 | 252301.5   | C <sub>24</sub> H <sub>46</sub> N <sub>3</sub> O <sub>12</sub> | (M+H) <sup>+</sup> |
| 571.3214 | 571.3209 | -0.8      | 1 | 42900.15   | C <sub>24</sub> H <sub>46</sub> N <sub>3</sub> O <sub>12</sub> | (M+H) <sup>+</sup> |
| 572.3243 | 572.3235 | -1.35     | 1 | 5619.08    | C <sub>24</sub> H <sub>46</sub> N <sub>3</sub> O <sub>12</sub> | (M+H) <sup>+</sup> |
| 613.3431 |          |           | 1 | 919383.31  |                                                                |                    |
| 657.3692 |          |           | 1 | 635559.13  |                                                                |                    |
| 701.3952 |          |           | 1 | 389435.53  |                                                                |                    |

MSMS Spectrum

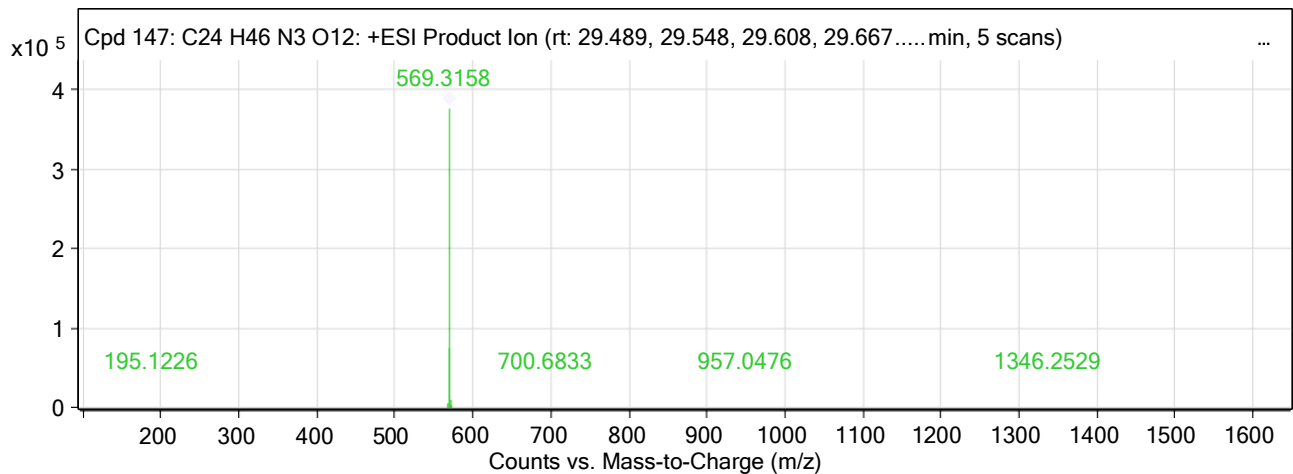

**MS/MS Spectrum Peak List**

| m/z      | Calc m/z | Diff(ppm)  | z | Abund     |
|----------|----------|------------|---|-----------|
| 133.0866 | 133.0859 | -5.34      | 1 | 35.34     |
| 195.1226 | 195.1214 | -6.56      | 1 | 38.89     |
| 263.1444 | 263.1476 | 11.89      | 1 | 12.98     |
| 309.2771 | 309.2775 | 1.02       | 1 | 38.16     |
| 311.2942 | 311.2945 | 0.84       | 1 | 31.57     |
| 538.2934 | 269.1482 | -499997.11 | 2 | 22.63     |
| 566.2939 | 566.292  | -3.46      | 1 | 30.54     |
| 567.2909 |          |            | 1 | 19.33     |
| 569.3158 | 569.3154 | -0.63      | 1 | 375936.84 |
| 570.3184 |          |            | 1 | 73973.11  |

| Compound Label       | m/z      | RT     | Algorithm  | Mass     |
|----------------------|----------|--------|------------|----------|
| Cpd 148: C28 H52 O14 | 613.3431 | 29.624 | Auto MS/MS | 612.3356 |

**Compound Chromatograms**

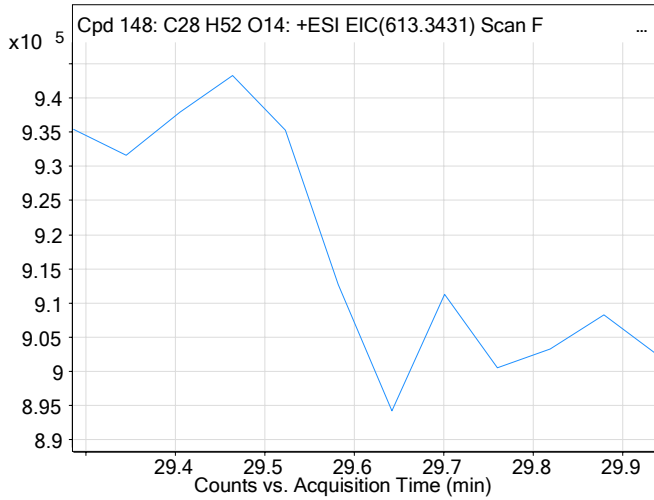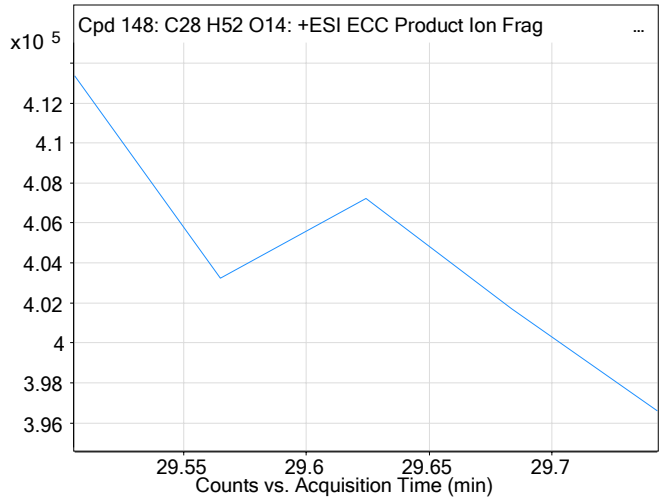

MS Spectrum

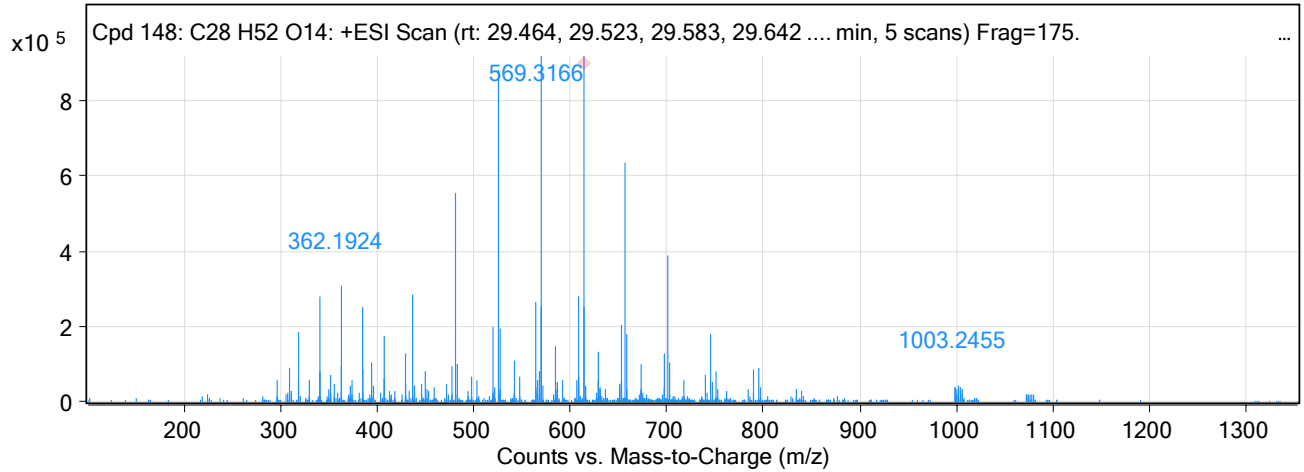

MS Zoomed Spectrum

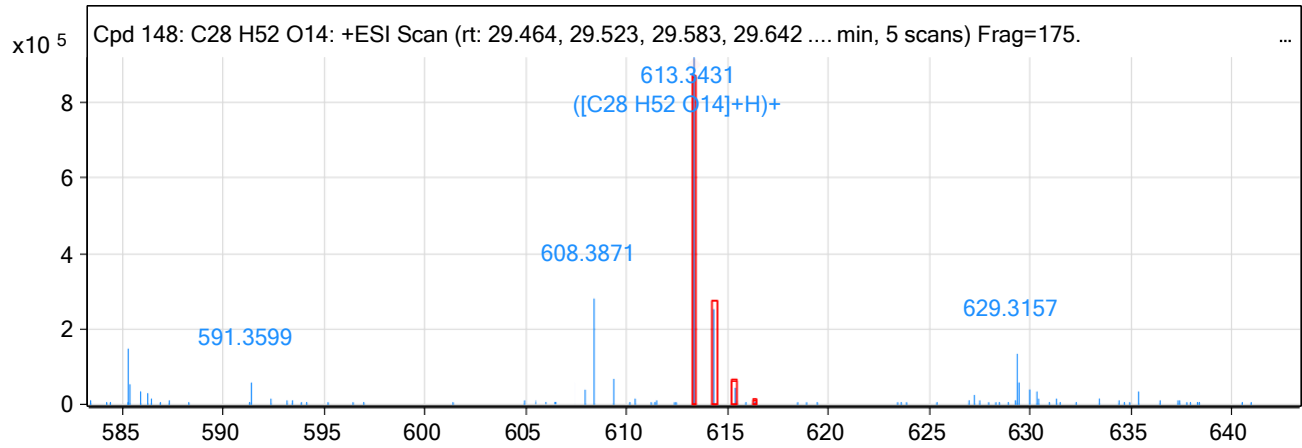

**MS Spectrum Peak List**

| m/z      | Calc m/z | Diff(ppm) | z | Abund      | Formula                                         | Ion    |
|----------|----------|-----------|---|------------|-------------------------------------------------|--------|
| 362.1924 |          |           | 2 | 309336.31  |                                                 |        |
| 481.2634 |          |           | 1 | 555476.44  |                                                 |        |
| 525.2903 |          |           | 1 | 882303.63  |                                                 |        |
| 569.3166 |          |           | 1 | 1063629.13 |                                                 |        |
| 613.3431 | 613.343  | -0.11     | 1 | 919383.31  | C <sub>28</sub> H <sub>52</sub> O <sub>14</sub> | (M+H)+ |
| 614.3457 | 614.3464 | 1.22      | 1 | 249711.97  | C <sub>28</sub> H <sub>52</sub> O <sub>14</sub> | (M+H)+ |
| 615.3477 | 615.3489 | 1.85      | 1 | 45267.2    | C <sub>28</sub> H <sub>52</sub> O <sub>14</sub> | (M+H)+ |
| 616.3516 | 616.3515 | -0.09     | 1 | 6131.24    | C <sub>28</sub> H <sub>52</sub> O <sub>14</sub> | (M+H)+ |
| 657.3692 |          |           | 1 | 635559.13  |                                                 |        |
| 701.3952 |          |           | 1 | 389435.53  |                                                 |        |

MSMS Spectrum

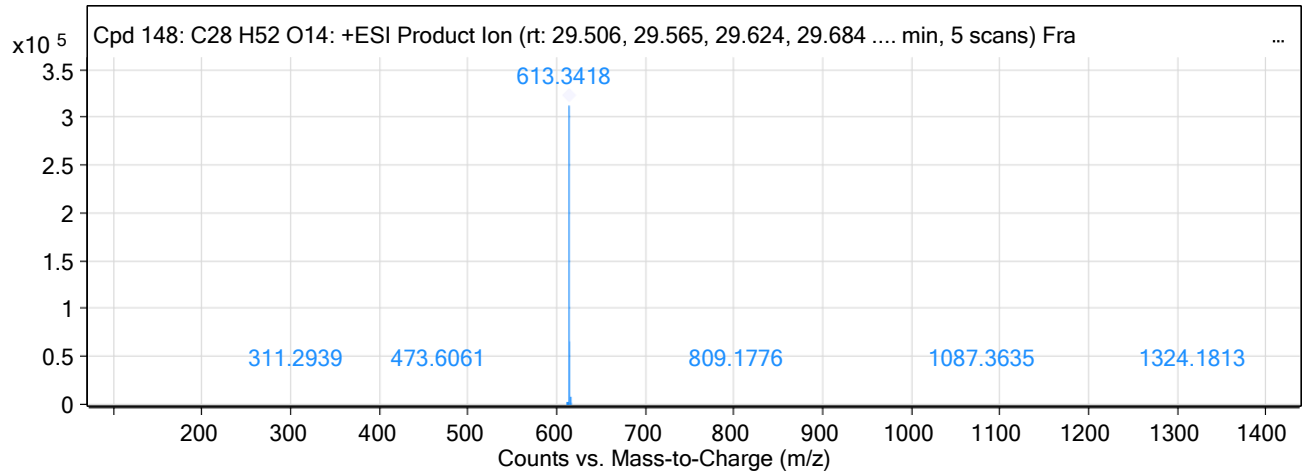

**MS/MS Spectrum Peak List**

| m/z      | Calc m/z | Diff(ppm) | z | Abund     |
|----------|----------|-----------|---|-----------|
| 133.0863 | 133.0859 | -3.01     |   | 45.63     |
| 145.016  | 145.0131 | -19.5     |   | 19        |
| 221.1373 | 221.1384 | 4.95      |   | 28.13     |
| 296.151  | 296.1466 | -15.01    |   | 15.85     |
| 307.2203 | 307.2268 | 21.07     |   | 13.01     |
| 309.1973 | 309.1908 | -21.16    |   | 13        |
| 309.2787 | 309.2788 | 0.43      |   | 38.67     |
| 311.2939 | 311.2945 | 1.89      | 1 | 66.63     |
| 357.0665 | 357.0664 | -0.48     | 1 | 16.55     |
| 613.3418 | 613.343  | 1.93      | 1 | 312112.31 |

| Compound Label                                           | m/z      | RT     | Algorithm  | Mass     |
|----------------------------------------------------------|----------|--------|------------|----------|
| Cpd 149: C <sub>26</sub> H <sub>48</sub> O <sub>13</sub> | 569.3167 | 29.874 | Auto MS/MS | 568.3093 |

Compound Chromatograms



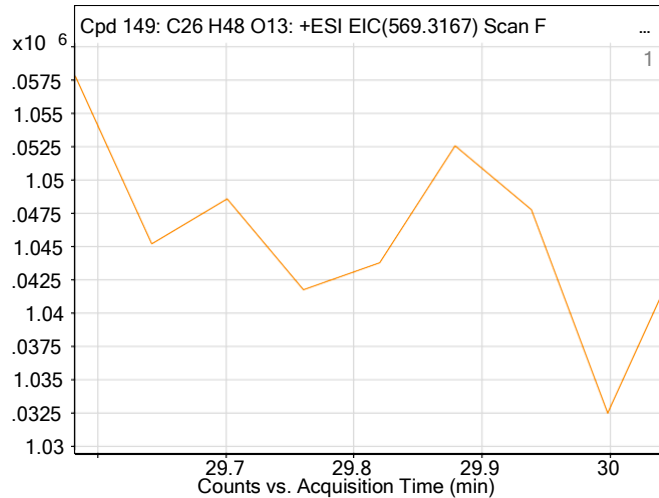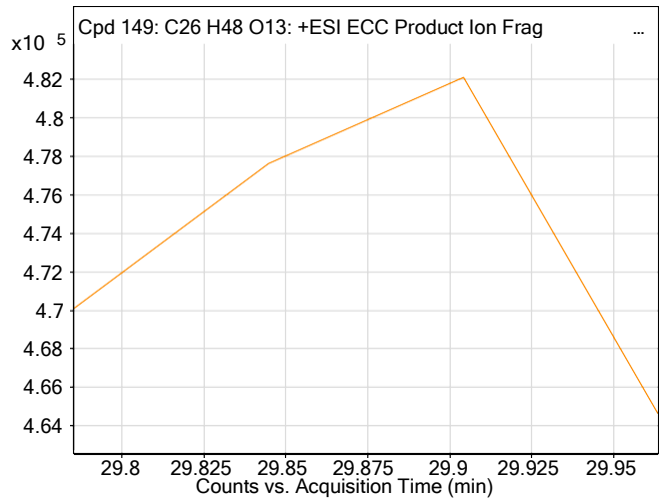

MS Spectrum

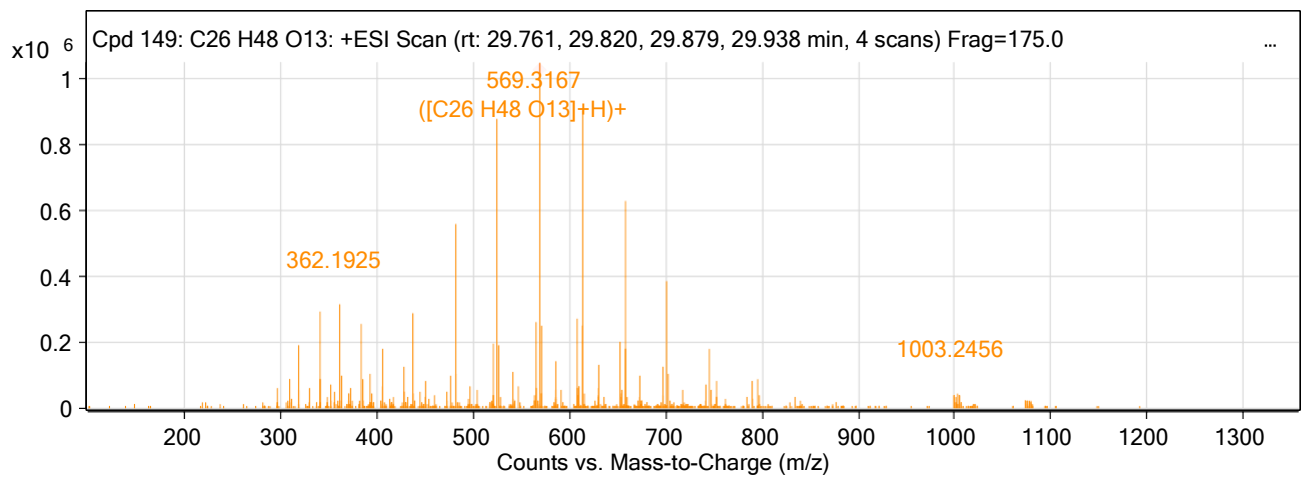

MS Zoomed Spectrum

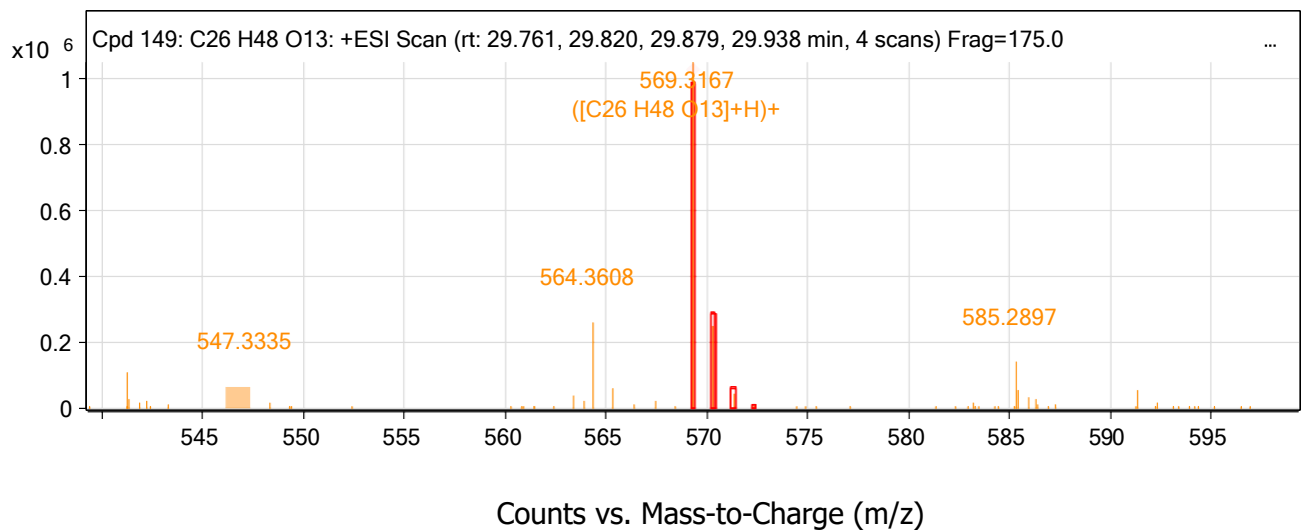

MS Spectrum Peak List

| m/z      | Calc m/z | Diff(ppm) | z | Abund      | Formula     | Ion    |
|----------|----------|-----------|---|------------|-------------|--------|
| 362.1925 |          |           | 2 | 312462     |             |        |
| 481.2636 |          |           | 1 | 557406.63  |             |        |
| 525.2905 |          |           | 1 | 875276.31  |             |        |
| 569.3167 | 569.3168 | 0.06      | 1 | 1046445.19 | C26 H48 O13 | (M+H)+ |
| 570.3195 | 570.3202 | 1.28      | 1 | 249569.02  | C26 H48 O13 | (M+H)+ |
| 571.3216 | 571.3226 | 1.82      | 1 | 42723.23   | C26 H48 O13 | (M+H)+ |
| 572.3243 | 572.3253 | 1.77      | 1 | 6011.05    | C26 H48 O13 | (M+H)+ |
| 613.3432 |          |           | 1 | 903692.19  |             |        |
| 657.3693 |          |           | 1 | 628058.75  |             |        |

MSMS Spectrum

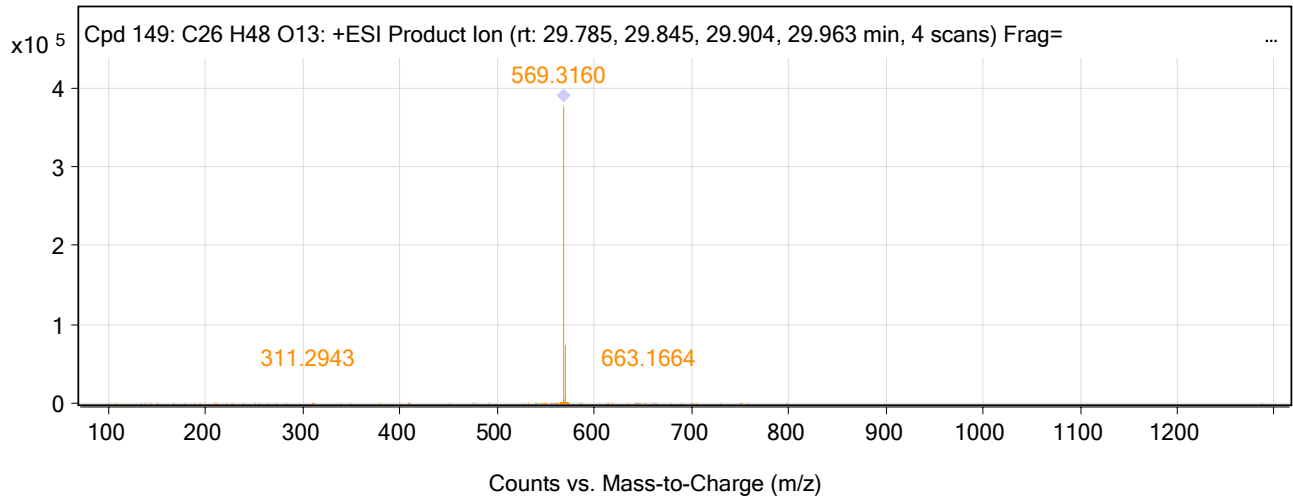

MS/MS Spectrum PeakList

| m/z      | Calc m/z | Diff(ppm) | z | Abund     |
|----------|----------|-----------|---|-----------|
| 142.0981 | 142.0988 | 5.34      |   | 15.06     |
| 177.1112 | 177.1121 | 5.47      |   | 13        |
| 211.0925 | 211.0965 | 18.74     |   | 14.03     |
| 227.1277 | 227.1278 | 0.51      |   | 13.26     |
| 263.1897 | 263.1853 | -16.71    |   | 28.82     |
| 311.2943 | 311.2945 | 0.56      |   | 52.45     |
| 408.2317 | 408.2354 | 8.91      |   | 13.81     |
| 569.316  | 569.3168 | 1.36      | 1 | 376993.81 |
| 570.3186 |          |           | 1 | 74450.87  |
| 571.3208 |          |           | 1 | 8931.74   |

| Compound Label       | m/z      | RT     | Algorithm  | Mass     |
|----------------------|----------|--------|------------|----------|
| Cpd 150: C28 H52 O14 | 613.3432 | 29.891 | Auto MS/MS | 612.3357 |

Compound Chromatograms

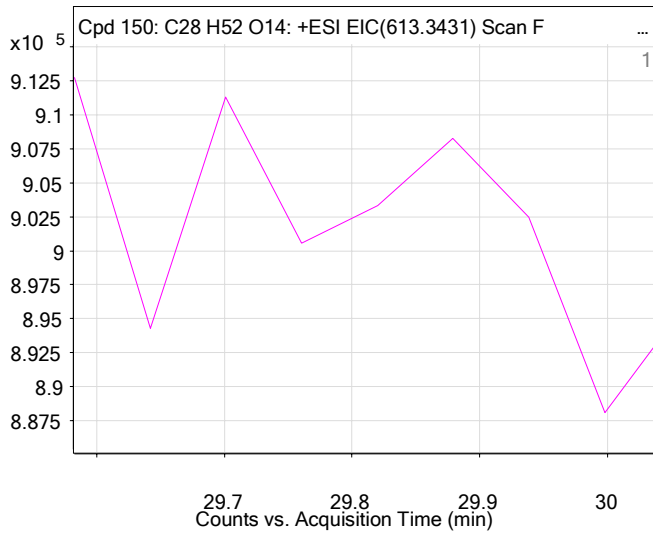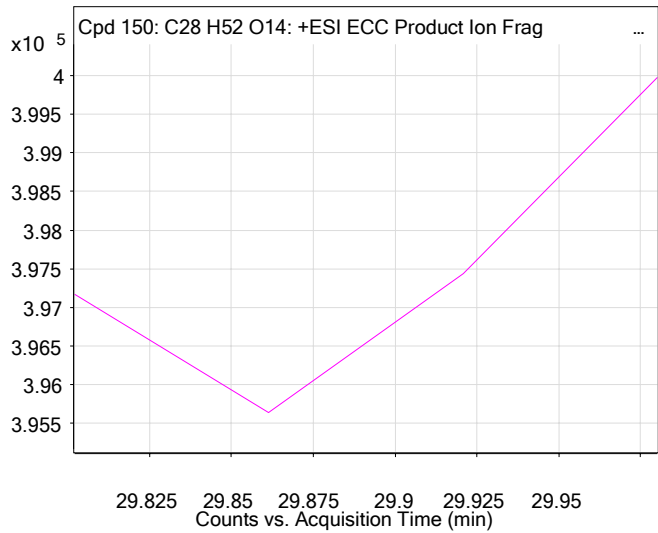

MS Spectrum

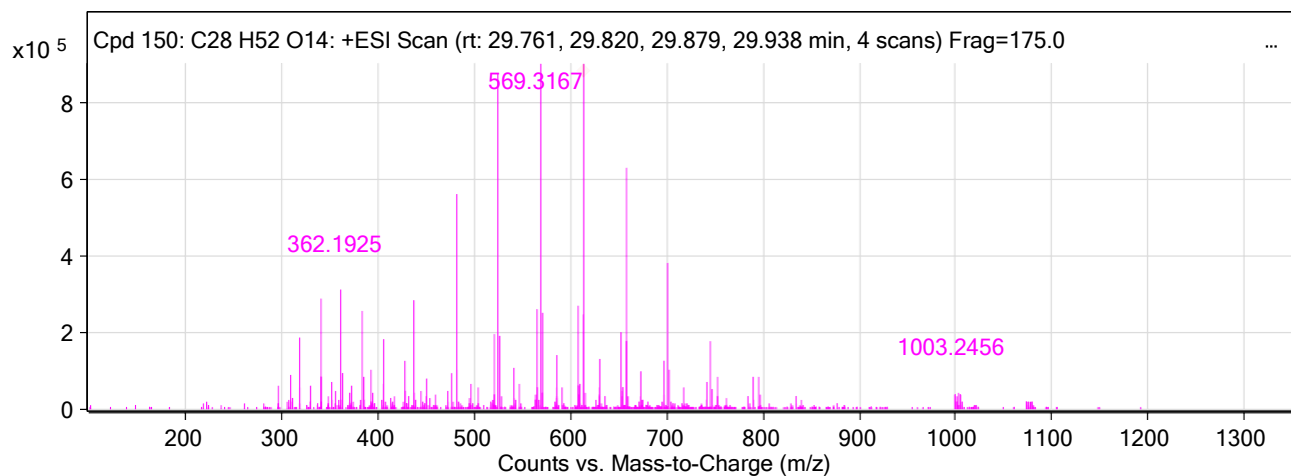

MS Zoomed Spectrum

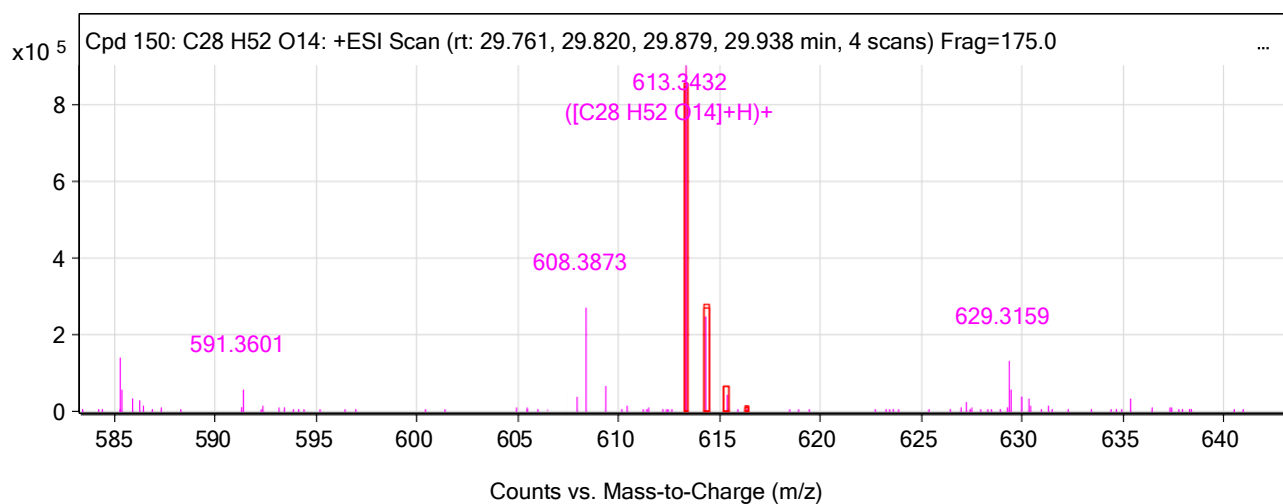

MS Spectrum Peak List

| m/z      | Calc m/z | Diff(ppm) | z | Abund      | Formula                                         | Ion                |
|----------|----------|-----------|---|------------|-------------------------------------------------|--------------------|
| 362.1925 |          |           | 2 | 312462     |                                                 |                    |
| 481.2636 |          |           | 1 | 557406.63  |                                                 |                    |
| 525.2905 |          |           | 1 | 875276.31  |                                                 |                    |
| 569.3167 |          |           | 1 | 1046445.19 |                                                 |                    |
| 613.3432 | 613.343  | -0.39     | 1 | 903692.19  | C <sub>28</sub> H <sub>52</sub> O <sub>14</sub> | (M+H) <sup>+</sup> |
| 614.3458 | 614.3464 | 0.99      | 1 | 248462.2   | C <sub>28</sub> H <sub>52</sub> O <sub>14</sub> | (M+H) <sup>+</sup> |
| 615.3478 | 615.3489 | 1.78      | 1 | 44215.35   | C <sub>28</sub> H <sub>52</sub> O <sub>14</sub> | (M+H) <sup>+</sup> |
| 616.3514 | 616.3515 | 0.29      | 1 | 6187.29    | C <sub>28</sub> H <sub>52</sub> O <sub>14</sub> | (M+H) <sup>+</sup> |
| 657.3693 |          |           | 1 | 628058.75  |                                                 |                    |
| 701.3954 |          |           | 1 | 384081.63  |                                                 |                    |

MSMS Spectrum

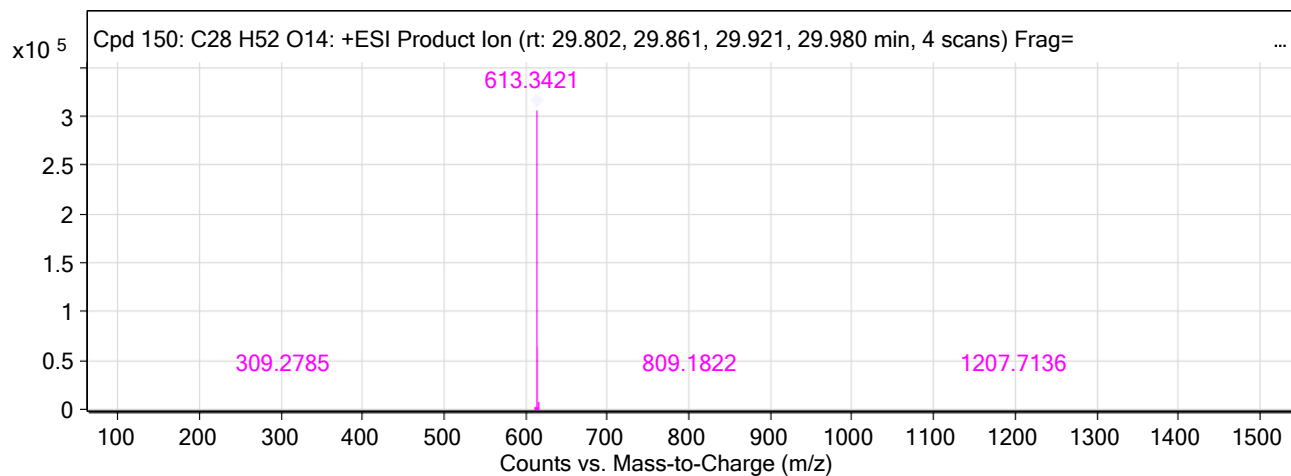

**MS/MS Spectrum Peak List**

| <b>m/z</b> | <b>Calc m/z</b> | <b>Diff(ppm)</b> | <b>z</b> | <b>Abund</b> |
|------------|-----------------|------------------|----------|--------------|
| 175.1352   | 175.1329        | -13.22           |          | 17.16        |
| 221.1371   | 221.1384        | 5.52             |          | 17.34        |
| 233.1771   | 233.1747        | -10.06           |          | 18.27        |
| 252.2019   | 252.2084        | 25.78            |          | 17.39        |
| 309.2785   | 309.2788        | 1.03             | 1        | 84.71        |
| 329.2268   | 329.2323        | 16.53            |          | 15.49        |
| 357.0697   | 357.0664        | -9.2             |          | 13           |
| 529.3314   | 529.3371        | 10.74            |          | 15.32        |
| 610.3121   | 305.1595        | -499994.39       | 2        | 33.67        |
| 613.3421   | 613.343         | 1.43             | 1        | 305906.91    |

--- End Of Report ---
